# Supplementary material for: Delineating yeast cleavage and polyadenylation signals using deep learning
Source: HighWire-hosted journal article supplement (doi:10.1101/gr.278606.123), 2024-06-24
Supplement: Supplemental_Table_S1.xlsx [file Supplemental_Table_S1.xlsx]

## Sheet: Legend
Table S1. The 3'-end sequencing datasets analyzed in this study.
This table lists the samples included in this study. The columns include:
GEO Accession	GEO accession number specific to the published study.
SRA Number	Individual SRA sample number.
Species	Species of the sample of interest.
Data type	Name of the sequencing method used to produce the data.
Genotype	Genotype of the included samples. All samples used in this study were wild-type.
Description	Details of culture conditions for each sample, if the yeast were cultured in rich media or subject to diauxic stress.

## Sheet: Sample Data
GEO Accession	SRA Number	Species	Data type	Genotype	Description
GSE67163	SRR1924458	Saccharomyces cerevisiae	3'READS	Wild type	Rich media
GSE67163	SRR1924459	Saccharomyces cerevisiae	3'READS	Wild type	Rich media
GSE67163	SRR1924460	Saccharomyces cerevisiae	3'READS	Wild type	Rich media
GSE95139	SRR5276077	Saccharomyces cerevisiae	3'READS	Wild type	Rich media
GSE95139	SRR5276079	Saccharomyces cerevisiae	3'READS	Wild type	Rich media
GSE151196	SRR11849623	Saccharomyces cerevisiae	3'READS	Wild type	Rich media
GSE151196	SRR11849624	Saccharomyces cerevisiae	3'READS	Wild type	Rich media
GSE151196	SRR11849625	Saccharomyces cerevisiae	3'READS	Wild type	Diauxic shift
GSE151196	SRR11849626	Saccharomyces cerevisiae	3'READS	Wild type	Diauxic shift
GSE53310	SRR1049516	Saccharomyces cerevisiae	3P-seq	Wild type	YPD media to mid-log phase
GSE75584	GSM1959710	Saccharomyces cerevisiae	Helicos	Wild type	YPD media to log phase
GSE95139	SRR5276080	Schizosaccharomyces pombe	3'READS	Wild type	Rich media
GSE198202	SRR18276461	Arabidopsis thaliana	3'READS+	Col 0 ecotype (wild type)	Exposed to light for 6 hr
GSE198202	SRR18276462	Arabidopsis thaliana	3'READS+	Col 0 ecotype (wild type)	Exposed to light for 6 hr
GSE198202	SRR18276463	Arabidopsis thaliana	3'READS+	Col 0 ecotype (wild type)	Exposed to light for 6 hr
