# Supplementary material for: Delineating yeast cleavage and polyadenylation signals using deep learning
Source: HighWire-hosted journal article supplement (doi:10.1101/gr.278606.123), 2024-06-24
Supplement: Supplemental_Table_S2.xlsx [file Supplemental_Table_S2.xlsx]

## Sheet: Legend
Table S2. The detailed architectures of deep learning models developed in this study.
Tab legend:
S_cerevisiae_PolyaClassifier	Describes the model architecture and required parameters for the S.cerevisiae-specific PolyaClassifier model. The branches, layer types, and hyperparameters are described.
S_cerevisiae_PolyaCleavage	Describes the model architecture and required parameters for the S.cerevisiae-specific PolyaCleavage model. The branches, layer types, and hyperparameters are described.
S_cerevisiae_PolyaStrength	Describes the model architecture and required parameters for the S.cerevisiae-specific PolyaStrength model. The branches, layer types, and hyperparameters are described.
S_pombe_PolyaClassifier	Describes the model architecture and required parameters for the S.pombe-specific PolyaClassifier model. The branches, layer types, and hyperparameters are described.
A_thaliana_PolyaClassifier	Describes the model architecture and required parameters for the A.thaliana-specific PolyaClassifier model. The branches, layer types, and hyperparameters are described.
Table legend:
Branch	Name of the model branch. Describes the purpose of the model architecture: either input, feature extraction, or fully connected layers.
Layer	Type of model layer used.
Parameters	Details required specific to the type of layer.

## Sheet: S_cerevisiae_PolyaClassifier
Branch	Layer	Parameters
Input	One-hot encoding	None
Feature extraction	1D convolution	512 filters
		Filter size 12
		Padding "valid"
		Stride length 1
		ReLU activation
	1D max pooling	Pool size 3
		Stride length 3
	Dropout	Rate 0.5
	Bidirectional LSTM	16 units
		Return sequences TRUE
	Dropout	Rate 0.5
	Flatten
Fully-connected layers	Dense​	256 nodes​
		ReLU activation​
	Dropout​	Rate 0.5
	Dense​	256 nodes​
		ReLU activation​
	Dropout​	Rate 0.5
	Dense​	128 nodes​
		ReLU activation​
	Dropout​	Rate 0.5
	Dense​	64 nodes​
		ReLU activation​
	Output (dense)​	1 node​
		Sigmoid activation​

## Sheet: S_cerevisiae_PolyaCleavage
Branch	Layer	Parameters
Input	One-hot encoding	None
Feature extraction	1D convolution	1024 filters
		Filter size 10
		Padding "valid"
		Stride length 1
		ReLU activation
	1D max pooling	Pool size 3
		Stride length 3
	Dropout	Rate 0.7
	Bidirectional LSTM	256 units
		Return sequences TRUE
	Dropout	Rate 0.7
	Flatten
Fully-connected layers	Dense​	128 nodes
		ReLU activation​
	Dropout​	Rate 0.3
	Output (dense)​	50 nodes
		Softmax activation​

## Sheet: S_cerevisiae_PolyaStrength
Branch	Layer	Parameters
Input	One-hot encoding	None
Feature extraction	1D convolution	256 filters
		Filter size 8
		Padding "valid"
		Stride length 1
		ReLU activation
	1D max pooling	Pool size 3
		Stride length 3
	Dropout	Rate 0.7
	Bidirectional LSTM	16 units
		Return sequences TRUE
	Dropout	Rate 0.7
	Flatten
Fully-connected layers	Dense​	128 nodes​
		ReLU activation​
	Dropout​	Rate 0.3
	Dense​	64 nodes​
		ReLU activation​
	Output (dense)​	1 node​
		Linear activation​

## Sheet: S_pombe_PolyaClassifier
Branch	Layer	Parameters
Input	One-hot encoding	None
Feature extraction	1D convolution	512 filters
		Filter size 6
		Padding "valid"
		Stride length 1
		ReLU activation
	1D max pooling	Pool size 3
		Stride length 3
	Dropout	Rate 0.5
	Bidirectional LSTM	16 units
		Return sequences TRUE
	Dropout	Rate 0.5
	Flatten
Fully-connected layers	Dense​	128 nodes​
		ReLU activation​
	Dropout​	Rate 0.5
	Dense​	64 nodes​
		ReLU activation​
	Output (dense)​	1 node​
		Sigmoid activation​

## Sheet: A_thaliana_PolyaClassifier
Branch	Layer	Parameters
Input	One-hot encoding	None
Feature extraction	1D convolution	512 filters
		Filter size 10
		Padding "valid"
		Stride length 1
		ReLU activation
	1D max pooling	Pool size 3
		Stride length 3
	Dropout	Rate 0.5
	Bidirectional LSTM	16 units
		Return sequences TRUE
	Dropout	Rate 0.5
	Flatten
Fully-connected layers	Dense​	256 nodes​
		ReLU activation​
	Dropout​	Rate 0.5
	Dense​	128 nodes​
		ReLU activation​
	Dropout​	Rate 0.5
	Dense​	64 nodes​
		ReLU activation​
	Output (dense)​	1 node​
		Sigmoid activation​
