# Supplementary material for: Delineating yeast cleavage and polyadenylation signals using deep learning
Source: HighWire-hosted journal article supplement (doi:10.1101/gr.278606.123), 2024-06-24
Supplement: Supplemental_Table_S3.xlsx [file Supplemental_Table_S3.xlsx]

## Sheet: Legend
Table S3. The motifs showing significant importance scores from the PolyaClassifer model in S. cerevisiae.
This table contains the motif importance quantification learned from the S.cerevisiae-specific PolyaClassifier model for 4mers, 5mers, and 6mers.
Description of the columns:
Motif	The hexamer sequence for the motif of interest.
Family	The assigned motif family based on the sequence composition of the motif.
Score	The per-site importance score for the motif of interest in the denoted region.
95% confidence interval: Lower bound	The lower bound on the 95% confidence interval around the per-site importance score in the denoted region.
95% confidence interval: Upper bound	The upper bound on the 95% confidence interval around the per-site importance score in the denoted region.
Sum importance profile	The position-specific sum importance score for each motif at the indicated position centered around the cleavage site.

## Sheet: 4mer motif importance
		[-120, -25) region			[-25, -15) region			[-15, -5) region			[-5, 2) region			[2, 15] region			Sum importance profile
Motif	Family	Mean importance score	95% confidence interval: Lower bound	95% confidence interval: Upper bound	Mean importance score	95% confidence interval: Lower bound	95% confidence interval: Upper bound	Mean importance score	95% confidence interval: Lower bound	95% confidence interval: Upper bound	Mean importance score	95% confidence interval: Lower bound	95% confidence interval: Upper bound	Mean importance score	95% confidence interval: Lower bound	95% confidence interval: Upper bound	-250	-249	-248	-247	-246	-245	-244	-243	-242	-241	-240	-239	-238	-237	-236	-235	-234	-233	-232	-231	-230	-229	-228	-227	-226	-225	-224	-223	-222	-221	-220	-219	-218
AAAA	A-rich_d0	0.277503	0.265932	0.289074	1.90809	1.8588	1.95739	0.55644	0.477053	0.635826	1.75889	1.58488	1.9329	0.369683	0.338569	0.400797	9.64688	15.5666	18.1057	27.7635	34.0249	48.2923	55.3305	65.4069	73.2899	69.9788	66.6599	60.3942	57.8433	61.4256	72.1885	47.7364	34.4582	26.7272	41.2036	58.4358	62.0458	73.7735	51.5647	76.7487	78.6551	94.9451	115.154	98.5807	79.6272	73.0131	84.4912	93.2988	80.6373
AAGA	A-rich_d1	0.255173	0.239206	0.27114	1.25807	1.18936	1.32678	0.150365	0.0571334	0.243596	1.14739	0.959917	1.33486	0.237519	0.18668	0.288358	15.9105	24.7246	34.5715	51.1153	55.961	81.9523	83.0389	81.1235	93.5688	100.012	96.4239	102.904	79.944	89.7474	76.2085	71.3711	69.9332	58.5871	58.3008	58.4827	73.6022	72.081	75.7448	88.8697	87.7998	88.6778	91.9339	95.1369	105.755	86.0192	92.816	95.2242	101.009
AGAA	A-rich_d1	0.334801	0.315498	0.354104	1.21752	1.14799	1.28704	-0.0753157	-0.172394	0.0217626	1.32065	1.14335	1.49794	0.0981678	0.057071	0.139265	12.3619	26.9526	30.9834	46.099	43.0678	51.1337	53.4707	64.9307	75.2672	65.119	61.3421	65.9002	63.6786	53.5335	64.0497	44.6207	50.6385	47.2892	50.2323	59.6542	50.6602	54.5968	62.3456	60.8897	68.2627	75.6992	84.3876	52.175	82.7782	77.4461	67.1988	81.1704	77.1695
AUAA	UA-rich_d1	1.41348	1.38376	1.4432	2.26618	2.21407	2.31829	0.50406	0.437266	0.570853	1.91173	1.76558	2.05787	0.00571939	-0.0320022	0.0434409	0.591679	-1.12318	0.807275	0.940242	-2.73596	-2.62819	-2.51399	-1.88565	-5.39682	-2.99492	-0.949539	-3.14122	-3.75958	-6.55223	-7.59808	-10.0762	-7.18856	-9.50859	-9.71463	-1.33034	-5.03683	-7.43526	3.97392	-5.70834	1.07955	0.239828	-5.38459	-8.51654	-3.36624	-5.30572	-1.39653	-12.756	1.9559
AUAU	UA-rich_d0	2.09622	2.06836	2.12408	1.43277	1.36077	1.50477	0.522083	0.462121	0.582045	2.1075	1.97954	2.23546	0.243919	0.199629	0.288209	-5.314	-5.178	-9.42494	-5.07779	-6.57469	-13.1245	-9.60194	-3.22015	-9.28001	-8.55023	-11.5143	-9.57465	-10.8589	-3.04792	-6.19534	-10.5364	-8.39573	-10.2539	-10.3974	-4.89209	0.961624	-0.958611	-8.32186	-8.81975	-11.6391	-5.44486	-6.04958	1.7785	-7.55298	-10.2732	-4.75404	-15.0807	-8.04695
AUUU	UA-rich_d1	0.912488	0.890659	0.934318	1.29095	1.23775	1.34415	1.18948	1.15256	1.22639	3.16784	3.0807	3.25498	1.03034	0.994967	1.06571	-0.280456	0.815639	-1.13042	-0.429881	-5.34982	5.9471	0.364081	1.94805	3.73385	13.2865	9.06661	5.15873	1.77562	9.78231	16.0066	10.83	15.8383	8.65234	7.98679	11.9431	17.0866	11.3384	14.4591	3.37478	9.73478	8.97908	10.4344	10.8045	7.53028	11.9302	5.65712	10.7301	11.1267
GAAA	A-rich_d1	0.153584	0.141699	0.165468	1.16189	1.09935	1.22443	-0.125076	-0.205727	-0.0444247	2.54389	2.34391	2.74387	0.119563	0.0720896	0.167036	12.81	15.9313	31.4142	32.6969	44.1392	62.0777	60.8254	64.4541	71.3125	69.4445	66.4724	85.7303	83.2177	76.1495	63.7503	50.804	43.6822	53.5213	77.3813	65.245	71.5163	52.9699	68.4593	79.5648	74.0331	95.9244	89.1833	71.9571	61.7422	87.5977	79.7723	56.5473	88.2724
GAAG	A-rich_d2	0.190317	0.173338	0.207295	0.468623	0.393097	0.544148	-0.334026	-0.412649	-0.255403	1.42674	1.17617	1.6773	-0.0849494	-0.141217	-0.0286818	18.0335	26.5437	37.258	38.7361	56.9213	57.8913	73.7096	78.4336	92.5701	75.9072	85.2218	80.5249	55.7693	79.9114	71.1209	75.8074	59.0435	62.4821	68.5714	54.0209	72.9174	65.1351	61.2133	79.6756	89.5218	72.0935	93.088	83.1052	71.2662	70.887	91.1204	87.9552	92.0166
UAUA	UA-rich_d0	2.33906	2.31202	2.3661	1.7217	1.64453	1.79887	0.228893	0.15976	0.298025	2.11755	1.99091	2.24419	0.0714415	0.0271948	0.115688	-4.40914	-5.17194	-9.52789	-8.76917	-14.2353	-14.076	-20.0146	-9.47171	-10.8796	-17.1481	-14.1486	-16.4704	-12.9606	-15.6145	-13.4853	-16.0574	-16.3217	-13.4149	-19.9901	-10.0258	-7.48899	-9.62421	-14.5507	-19.5366	-15.5712	-13.7368	-15.7527	-13.7906	-7.51587	-13.5049	-27.6126	-14.0674	-19.7013
UAUU	UA-rich_d1	1.0049	0.982057	1.02774	1.09288	1.03622	1.14953	1.03802	1.00292	1.07312	2.64101	2.56551	2.7165	0.786366	0.756705	0.816027	-4.22371	-1.59568	-2.9998	-2.73418	-3.76389	-9.68411	-15.7352	-5.7514	-3.17425	-7.05028	-13.7689	-12.0121	-10.4999	-3.9278	-5.08567	-1.15207	-3.85033	-2.3812	-4.15952	0.919794	0.653874	-2.08446	-1.14442	-3.55636	-7.16862	-5.39293	-2.79398	-4.91532	-7.9369	-12.0571	-8.37049	-4.17256	-3.45995
UGUA	UA-rich_d1	1.7436	1.70793	1.77927	1.19773	1.09513	1.30033	0.315367	0.246397	0.384338	1.79969	1.62772	1.97166	0.234444	0.187251	0.281637	-1.46659	-3.4564	-5.82593	-8.1094	-9.12788	-8.00482	-11.3206	-11.8196	-14.7293	-10.0161	-10.2043	-11.2075	-11.5773	-11.3192	-11.5208	-12.8975	-9.99563	-4.33203	-8.05774	-11.3519	-12.4707	-10.0223	-10.7686	-10.03	-12.4356	-7.29734	-11.1363	-8.64147	-12.1556	-5.16139	-12.6577	-5.48344	-10.2467
UUAU	UA-rich_d1	1.30061	1.2721	1.32913	0.975044	0.918937	1.03115	1.00999	0.972426	1.04756	2.87681	2.78457	2.96905	0.776329	0.740801	0.811857	-4.32796	-6.00375	-6.1022	-4.93592	-11.6379	-13.4601	-8.44691	-11.501	-12.9922	-16.4554	-12.5196	-8.8164	-16.0799	-11.9075	-6.0866	-17.6025	-1.09634	-4.55777	2.53295	-0.340757	-4.67567	-5.64819	-2.0587	-8.20233	-6.93096	-10.5386	-5.12636	-11.0704	-10.8601	-12.2742	-10.3494	-11.5372	-17.1743
UUUA	UA-rich_d1	1.15618	1.13259	1.17977	1.54137	1.48155	1.60119	0.905138	0.865281	0.944994	3.58838	3.47354	3.70321	0.901877	0.869574	0.93418	-0.70299	-5.21872	-3.92735	-12.4308	-17.1481	-8.16483	-11.6246	-11.6022	-19.6855	-12.4022	-10.7517	-5.27833	-12.5997	-13.2182	-16.4325	-7.17847	-5.12481	3.18353	-5.76642	-6.19813	-9.26728	-0.00331482	-1.53807	-3.20289	-14.0197	-9.35259	-9.50422	-10.7317	-9.63689	-4.3311	-8.75809	-7.18144	-15.6933
UUUC	U-rich_d1	0.230027	0.217452	0.242603	0.0922807	0.035694	0.148867	0.949645	0.908323	0.990967	3.40609	3.30823	3.50394	1.31086	1.27605	1.34566	0.357189	1.46473	-1.11151	-0.0701673	-4.26353	-10.3036	-2.98106	-4.57994	0.875768	-0.0452215	2.14267	0.0174191	-0.383024	-3.55111	4.28036	4.59926	9.01032	6.27035	7.43539	9.19243	5.42113	10.0976	6.97058	4.16259	-1.81356	5.59528	4.26333	0.757685	8.51316	5.39021	3.45333	10.1564	9.35753
UUUU	U-rich_d0	0.582224	0.569508	0.59494	0.753866	0.709379	0.798353	1.41178	1.38156	1.442	3.11985	3.05957	3.18012	1.81861	1.79172	1.8455	-1.60401	-1.43165	-1.89849	-10.3117	-6.12849	-10.4559	-0.999973	-4.69354	-6.49098	1.01451	0.754788	-1.79506	-4.90758	-0.0669322	13.0225	25.8777	22.783	18.745	19.7705	23.4931	26.4211	23.6727	17.0681	13.6481	10.1037	7.30969	9.92618	11.6272	13.8958	15.3532	14.5419	11.8847	12.5647
[truncated: 468 more columns]

## Sheet: 5mer motif importance
		[-120, -25) region			[-25, -15) region			[-15, -5) region			[-5, 2) region			[2, 15] region			Sum importance profile
Motif	Family	Mean importance score	95% confidence interval: Lower bound	95% confidence interval: Upper bound	Mean importance score	95% confidence interval: Lower bound	95% confidence interval: Upper bound	Mean importance score	95% confidence interval: Lower bound	95% confidence interval: Upper bound	Mean importance score	95% confidence interval: Lower bound	95% confidence interval: Upper bound	Mean importance score	95% confidence interval: Lower bound	95% confidence interval: Upper bound	-250	-249	-248	-247	-246	-245	-244	-243	-242	-241	-240	-239	-238	-237	-236	-235	-234	-233	-232	-231	-230	-229	-228	-227	-226	-225	-224	-223	-222	-221	-220	-219	-218
AAAAA	A-rich_d0	0.292011	0.274405	0.309617	2.06967	1.98355	2.1558	0.470352	0.314296	0.626408	1.31467	1.00934	1.61999	0.572922	0.518796	0.627049	4.71052	4.37457	6.44283	11.075	13.1887	21.6966	24.0919	21.8886	33.7715	27.2794	25.0207	19.3204	25.4806	28.7666	25.4089	11.5455	11.8682	6.08532	16.3705	25.6097	30.1981	24.6684	28.8562	26.0586	37.2401	49.1133	54.8883	41.5123	33.8944	33.3354	41.3049	44.7449	45.2712
AAAAG	A-rich_d1	0.254359	0.229033	0.279685	1.6028	1.48766	1.71795	0.159898	-0.0436383	0.363433	1.90646	1.48223	2.33069	0.3099	0.235983	0.383817	6.55203	4.91325	11.1753	14.9772	14.3267	14.6656	21.3288	23.412	22.1614	25.593	27.955	19.6595	22.8359	24.0396	31.6266	25.3677	16.1619	12.7976	15.4148	26.2607	22.8393	30.9142	16.4463	25.9271	32.8012	30.896	37.3057	32.6091	27.7676	22.5739	21.9843	30.6662	21.1717
AAAAU	A-rich_d1	0.557548	0.524161	0.590935	2.34654	2.26118	2.43189	0.951182	0.830984	1.07138	1.97496	1.70878	2.24114	0.238081	0.191211	0.284952	1.89757	3.53505	1.248	5.96201	8.19428	9.43545	10.9514	13.5253	16.1804	14.0697	13.8706	12.7175	6.20481	9.32948	13.672	7.65986	7.81607	4.97149	7.32602	7.0486	7.06548	14.1261	9.57822	18.1985	8.95764	14.6873	22.5218	15.1245	12.7906	19.4829	15.9637	14.1643	15.8443
AAAGA	A-rich_d1	0.318442	0.29017	0.346714	1.3939	1.27396	1.51384	-0.036612	-0.25738	0.184156	2.21527	1.83058	2.59996	0.455817	0.362969	0.548666	7.91217	9.56408	15.0266	21.4502	21.4986	29.0036	21.4138	33.9481	22.3784	38.0791	36.4526	22.4338	32.0831	23.1786	23.2077	32.5498	22.6254	19.4811	17.0036	19.2496	20.055	21.9808	40.8798	25.7484	29.1517	36.2776	35.1943	42.2714	33.59	35.067	31.8311	25.049	40.3362
AAAUA	UA-rich_d1	1.7604	1.71125	1.80955	2.32467	2.21848	2.43087	0.543951	0.403145	0.684757	2.42276	2.16169	2.68384	0.0215904	-0.0478595	0.0910404	-2.41928	-2.85664	-4.48756	-6.54489	-5.99241	-2.16767	-2.103	-2.61967	3.07081	-1.33621	0.0914514	-3.52355	-2.23188	-5.90335	1.51663	-0.580157	-8.66519	-11.618	-3.27624	0.0127551	0.414901	-6.97787	-2.98353	-0.28984	0.44048	2.60339	1.8213	2.45318	3.51312	-1.31293	-1.54821	-1.46578	-1.39314
AAGAA	A-rich_d1	0.308091	0.282294	0.333888	1.75213	1.63757	1.86669	0.119128	-0.0766611	0.314917	1.37845	1.12315	1.63376	0.473053	0.39475	0.551355	13.7453	19.0469	20.7104	30.6606	30.3654	39.2442	50.1887	42.7324	45.6192	42.9739	54.745	45.009	36.4624	43.4304	41.0804	33.1151	34.0524	30.5304	38.1244	34.6141	33.2289	39.711	38.1105	44.5251	57.2008	52.1338	39.2307	53.0879	59.7547	47.0621	60.3347	53.0118	62.3203
AAUAA	A-rich_d1	1.13457	1.09043	1.17871	2.77508	2.67735	2.87281	0.6033	0.470902	0.735697	1.61288	1.41829	1.80748	0.0818536	0.00699213	0.156715	0.36421	-1.11597	2.28754	0.510765	0.0100814	-0.631167	-1.67007	-1.21003	-1.53262	4.76419	1.72484	-2.88652	-3.10375	-2.28163	-7.35356	0.588849	-1.15392	-6.3973	1.38249	-1.39949	-1.4467	4.46376	-3.57002	0.034049	0.597724	1.10211	-1.5766	1.15944	-0.22321	2.79615	-1.60817	2.002	1.30121
AAUAU	UA-rich_d1	1.55371	1.50243	1.60498	2.20824	2.10998	2.30651	0.981526	0.881999	1.08105	2.22573	2.02252	2.42895	0.277389	0.208274	0.346503	-2.63806	-4.23753	-1.95379	-2.18241	-5.19732	-0.935635	0.734026	-6.23756	-1.0906	1.36229	-2.61854	-2.03242	-2.00244	-2.04374	-1.06439	-0.22992	-2.43135	-1.31418	-5.10463	0.532903	0.49737	-1.29371	-2.20179	-1.31649	-4.711	-0.611941	5.64901	1.41087	-3.13238	-0.0989978	-4.34682	-3.60963	2.39203
ACAUA	UA-rich_d1	2.31029	2.24848	2.37209	1.61099	1.43589	1.78609	0.00261536	-0.129532	0.134763	2.22002	1.95979	2.48025	0.0533144	-0.0634772	0.170106	-3.37135	-2.14111	0.514528	-1.29213	-2.61003	-3.4675	-5.92291	-2.73306	-4.86669	-3.12997	-2.67323	-5.14588	-1.61373	-2.7072	-3.01196	-6.30608	-3.56028	-2.53536	-3.31249	-2.45704	-0.470805	-3.21975	-3.92783	-0.93068	2.03048	-1.69786	-1.26487	-1.95911	-4.69618	-3.0783	-1.77149	-0.755322	-5.25837
AGAAA	A-rich_d1	0.410957	0.374922	0.446993	1.5329	1.40766	1.65814	-0.291963	-0.520649	-0.0632775	1.4181	1.16491	1.6713	0.325064	0.2454	0.404728	5.54685	11.1796	12.9945	20.4868	17.4759	21.2306	25.5497	23.5046	24.9961	19.286	30.5567	24.1558	32.0069	17.3543	21.7638	14.4171	16.3764	24.5156	23.6933	23.3685	17.2525	25.7305	30.1814	25.0015	33.6646	28.0247	28.8533	24.3353	32.5405	31.7404	25.1327	31.8638	33.8342
AGAAG	A-rich_d2	0.321614	0.286312	0.356916	0.749519	0.581497	0.917542	-0.23562	-0.407136	-0.0641037	1.78467	1.44508	2.12427	-0.0185373	-0.119058	0.0819837	7.31164	13.0571	17.0463	20.3676	17.6912	24.2227	25.6508	35.2214	40.0823	35.3139	17.9916	30.7573	24.9674	25.4183	35.5826	21.5143	24.7293	14.9312	15.0188	20.7364	21.803	25.2889	31.412	31.222	27.3533	41.4357	36.7175	25.7955	34.3113	42.4035	40.45	36.3921	27.0586
AUAAA	UA-rich_d1	1.6185	1.56949	1.6675	2.54574	2.45251	2.63896	0.247905	0.112588	0.383222	2.14917	1.89894	2.39941	0.106463	0.0397959	0.173131	0.101622	0.918697	1.44053	1.03461	0.372664	-0.676357	0.457439	2.51208	-1.06415	1.12535	0.938192	1.70607	-2.0504	0.434843	-4.40704	-3.68907	-0.676095	-2.74624	-2.22585	0.68609	-1.26886	-2.6428	3.3935	0.654525	5.47372	1.75	-2.22018	0.917736	0.917145	2.03472	-0.26599	-4.16085	1.04703
AUAAU	UA-rich_d2	1.71336	1.6548	1.77192	2.69325	2.60188	2.78461	0.978295	0.874546	1.08204	2.05828	1.83223	2.28433	0.09588	0.0345425	0.157217	-0.106928	-1.39576	-0.458669	1.11951	-2.53453	-2.39681	-1.32389	-1.54202	-3.19659	-2.87964	-2.34183	-1.04329	-1.40982	-4.96455	0.126152	-3.90919	-5.94465	1.31802	-2.27396	-1.85484	-0.0647412	-5.35284	-1.14765	-6.4643	-1.32085	-1.29421	-4.50417	-6.29116	-0.884672	-0.803768	-1.23472	-5.27828	-2.5049
AUACA	UA-rich_d1	1.90843	1.84783	1.96903	1.43972	1.29104	1.5884	-0.0301455	-0.178933	0.118642	1.65482	1.4214	1.88825	0.0557321	-0.0647194	0.176184	-0.891776	-0.656921	-3.00073	-2.22391	-0.0572649	-0.555085	-2.97714	-3.13473	-3.71518	0.00686121	-2.6044	-3.12699	-1.69165	-1.98708	-0.821734	-3.41153	-1.43832	-3.34888	-2.21465	1.77277	1.36773	-1.14041	0.112846	-1.81515	-3.02196	-2.35279	-5.70076	-0.0739294	1.96174	-4.7511	-0.116902	-2.23223	-3.03386
AUAUA	UA-rich_d0	2.83001	2.78803	2.87198	1.97894	1.83545	2.12242	-0.0919553	-0.255903	0.0719922	1.51978	1.23092	1.80864	-0.0817014	-0.186848	0.0234454	-1.71113	-1.73006	-5.96446	-4.42572	-4.96467	-4.60388	-2.97306	-1.24884	-3.16079	-2.66933	-3.88178	-6.07503	-3.35399	-4.95552	-4.3312	-6.91353	-5.42417	-3.17578	-5.66624	-2.22506	1.92137	-1.03365	-7.42623	-3.96514	-6.13803	-3.17551	-6.62038	6.37907	-3.9391	-6.60045	-2.71227	-10.2252	-8.97927
AUAUU	UA-rich_d1	1.57634	1.52585	1.62682	1.81303	1.70401	1.92206	1.25258	1.17437	1.33078	2.81977	2.661	2.97853	0.725639	0.671401	0.779877	-0.724948	-0.419523	-0.502418	0.200289	-2.22841	-4.34129	-2.33094	-1.58162	0.62684	-0.561166	-1.75428	-0.536821	-2.55408	2.29706	-0.180962	-0.731132	2.23588	-0.617155	-1.33684	0.226413	0.801662	1.71535	0.668173	-3.14565	-1.74144	1.02123	-2.0748	-0.271037	-2.89	-3.92383	0.896038	-0.196425	2.34687
AUGUA	UA-rich_d1	2.59108	2.52331	2.65885	1.85767	1.59012	2.12523	0.135395	-0.05597	0.326759	1.75079	1.43293	2.06865	0.166169	0.0397436	0.292595	-0.470116	-1.94233	-1.81957	-5.07509	-2.89727	-4.5036	-4.48092	-6.77037	-0.442929	-4.00571	-1.1902	-2.06054	-2.87205	-6.36352	-4.24312	-1.2756	-0.085768	-0.594308	-5.6519	-3.60879	-2.68807	-5.07934	-2.7263	-4.92324	-1.31979	-1.47127	-3.18376	-7.39712	-2.43021	-3.21018	-0.356251	-2.73072	-5.20127
AUUUA	UA-rich_d1	1.83263	1.77883	1.88643	2.10812	1.98197	2.23428	0.950049	0.86313	1.03697	3.57363	3.39548	3.75179	0.698102	0.6252	0.771004	-1.66432	-1.76954	-3.39037	-3.62804	-3.66294	-2.03787	-2.30789	-5.33549	-5.85192	-1.98661	-1.36334	-4.29306	-3.29933	-6.39151	-1.51035	-4.63591	-1.54622	-5.13135	-4.61177	-3.96591	-0.514471	2.35296	-1.00296	-3.5496	0.300916	-4.44886	-3.77742	-3.28649	-0.833177	-4.83958	-1.98647	-3.98011	-2.11997
AUUUU	U-rich_d1	0.860152	0.827322	0.892981	1.46734	1.38004	1.55463	1.77454	1.70474	1.84434	3.95267	3.8238	4.08154	1.514	1.45314	1.57487	0.764899	-2.00415	-4.74407	-2.67315	-2.29553	2.77901	0.0292316	-2.83806	2.97605	2.24785	-0.248504	1.91597	-0.328437	6.0397	10.8034	6.49359	7.12371	5.47605	4.70502	3.84017	7.02039	3.12213	3.81265	0.960062	2.36799	2.43291	3.21459	0.453301	5.5608	2.96728	-0.374978	5.22288	5.92434
CAUUU	U-rich_d2	0.63901	0.596408	0.681611	0.875644	0.770172	0.981116	1.31909	1.23183	1.40636	3.88755	3.68483	4.09027	1.02814	0.95119	1.1051	-0.347521	-0.897118	-0.938804	-0.11482	0.786765	0.0638894	0.234663	1.37386	2.91296	1.03773	0.599536	2.70254	2.8508	4.45789	1.95912	4.60608	-0.369651	2.18937	4.09717	4.00073	1.55668	3.85031	1.23139	2.02344	2.84595	2.27704	1.84894	2.06024	1.28518	2.57317	2.69832	2.17724	2.1455
CUUUU	U-rich_d1	0.530155	0.498825	0.561485	0.559006	0.456674	0.661338	1.61451	1.52897	1.70005	3.27268	3.14593	3.39943	1.62065	1.55536	1.68593	0.49657	2.11596	-1.64858	-0.840361	-1.94005	2.34309	-0.377484	-1.62164	-0.441978	-1.66995	-0.781204	-0.762973	1.20538	2.98287	3.42195	3.65305	6.12751	2.57842	3.35361	3.09623	1.74387	2.66046	2.03739	1.32691	1.03259	1.31267	-2.11696	0.635332	1.58212	1.90394	2.54107	3.65686	1.99768
GAAAA	A-rich_d1	0.212647	0.192081	0.233213	1.42798	1.32206	1.5339	-0.277475	-0.45386	-0.10109	2.47824	2.17221	2.78428	0.293317	0.218823	0.367811	6.23325	8.09894	15.9513	13.1475	24.6834	29.0136	27.2001	35.0345	29.5199	36.7471	29.7955	38.8399	35.092	40.8013	21.6339	24.7467	19.1077	25.3461	37.4316	37.52	33.1938	22.8753	34.3162	31.1675	35.7162	53.7713	37.676	33.5619	27.3777	50.4452	40.7305	26.8295	38.2055
GAAGA	A-rich_d2	0.281981	0.253192	0.310771	0.720059	0.542771	0.897347	-0.449954	-0.616914	-0.282994	1.84402	1.56	2.12804	0.103751	-0.00524027	0.212742	11.3662	15.6915	27.8301	31.0578	40.6729	36.3659	46.5969	49.4337	63.894	44.7536	51.7767	43.519	35.9877	44.0467	39.0944	39.1807	29.7569	34.7998	32.3004	38.1015	51.873	40.342	37.1567	47.6991	51.9914	48.2282	55.8301	48.2693	44.4695	42.5234	53.6558	60.6717	64.9305
GAUGA	NA	0.14239	0.0987134	0.186067	0.170281	0.0350034	0.305558	-0.239238	-0.387899	-0.0905762	1.36016	1.00645	1.71387	-0.00210628	-0.0881811	0.0839686	1.01741	13.6457	13.8967	18.3033	23.5912	26.2598	31.5747	25.271	29.2342	19.5255	28.237	36.0387	28.6149	25.5167	28.2577	21.0383	29.7984	29.7166	18.9657	21.2851	21.2309	22.8784	22.7098	28.1909	17.9499	25.9709	19.4889	27.8339	28.2291	33.959	23.1263	33.5624	26.1082
GUAUA	UA-rich_d1	2.46983	2.40689	2.53277	1.61261	1.4214	1.80381	0.234174	0.0820209	0.386326	1.98725	1.73275	2.24174	-0.066728	-0.176046	0.0425899	-0.507455	-2.555	-0.311236	-1.93164	-4.6911	-4.5714	-3.04785	-4.25395	-3.75539	-4.42626	-6.46082	-1.89225	-1.60494	-1.66304	-4.99442	-1.7299	-4.85423	-7.08065	0.760841	-1.03208	-3.45751	-5.61429	-5.47194	-4.19302	-2.41362	-0.941028	-2.54225	-2.52369	-2.03995	-10.0509	-3.22443	-2.57786	-8.07737
UAAAU	UA-rich_d1	2.11736	2.05794	2.17679	2.51736	2.40302	2.6317	0.715078	0.590895	0.839262	3.49066	3.21605	3.76527	-0.0909914	-0.164986	-0.0169969	-1.55293	-0.941244	-1.8502	-0.776693	0.292066	-2.5455	-1.5357	-1.32477	-4.60821	-0.0360974	-6.52691	-2.00016	-4.25633	-4.21137	-2.09502	-10.0949	-8.80725	-1.87325	-3.87235	-2.89525	-3.3224	-5.14151	-1.49135	-0.154773	-2.37156	-3.38231	-4.02343	-3.22435	-4.08778	-2.33766	-0.566529	-4.81713	-8.07204
UAAUA	UA-rich_d2	1.43984	1.38481	1.49487	2.68703	2.59098	2.78308	0.562104	0.464807	0.659401	2.38054	2.19356	2.56753	-0.0610995	-0.121897	-0.00030178	-2.33835	-0.937772	-2.70257	-3.53716	-0.0663595	-5.05712	-3.71239	-4.39069	-1.94211	-6.46555	-5.1803	-5.13124	-5.0243	-4.34524	-3.79266	-3.14779	-5.84811	-2.75926	-5.47998	-2.34805	-2.43142	-3.71962	-5.39752	-6.54962	-6.19435	-5.27038	-2.00035	-3.72168	-5.78181	-2.54452	-4.54942	-1.18913	-5.95354
UACAU	UA-rich_d1	2.26583	2.20231	2.32935	1.15102	0.955885	1.34615	0.395797	0.262107	0.529487	2.87587	2.60746	3.14427	0.224939	0.130104	0.319774	0.28823	-2.9103	0.677279	-3.00615	-1.3672	-0.48679	-1.29689	-1.13712	-3.42077	-1.34382	-1.79716	-3.1006	-1.66741	-2.61528	-0.956687	-2.15529	-2.99874	-2.84275	-0.79114	-0.484038	-3.60333	-1.18897	-3.50566	0.794859	-1.20462	-0.685353	-1.51818	-3.35079	-3.16379	-1.24128	-3.74099	-3.18561	-1.51282
UAUAA	UA-rich_d1	2.29718	2.24051	2.35386	2.58461	2.4806	2.68862	0.345786	0.228991	0.462582	2.67508	2.41988	2.93028	0.0714678	0.0017751	0.14116	-0.662865	-1.64195	-0.745276	-1.86203	-3.16216	-2.99608	-6.23039	-6.69211	-3.01687	-2.59801	-3.52872	-0.994253	-3.3085	-6.02662	-5.1624	-1.75604	-3.28768	-2.84312	-3.48835	-5.53634	-5.6652	-0.683689	-2.02483	-3.59451	-2.64689	-4.75236	-7.15023	-2.47899	-1.84822	-6.08223	-9.27374	-2.9724	-5.57078
UAUAC	UA-rich_d1	2.13711	2.07538	2.19885	1.29427	1.10749	1.48106	0.28122	0.153587	0.408853	1.89468	1.62918	2.16018	0.183343	0.0864385	0.280248	-0.761102	-0.615171	-4.26405	-1.24171	-4.40378	-4.87363	-4.34585	-2.35591	-2.81817	-3.34703	-4.11398	-5.43891	-3.17781	-4.37198	-2.05793	-4.33641	-3.99288	-5.25081	-5.01502	-0.416955	-2.77165	-2.77317	-2.43879	-3.51625	-4.18314	-2.90737	-1.88946	-0.429766	-0.213002	-4.13579	-4.59239	-3.9025	-5.54141
UAUAU	UA-rich_d0	2.76918	2.72637	2.81199	1.35748	1.18618	1.52878	0.484904	0.340865	0.628944	2.7538	2.54735	2.96025	0.276877	0.187523	0.366231	-1.17645	-1.71554	-2.97317	-2.46779	-2.67616	-4.09003	-3.60605	-1.18394	-2.94508	-6.91789	-1.25827	-8.89441	-3.27746	-1.32897	-3.94264	-5.90797	-4.39415	-3.34157	-5.17324	1.33552	1.87397	-2.97117	-5.17717	-9.16563	-2.49587	-5.4385	0.244193	-3.70142	-6.646	-1.60759	-8.12897	-0.676811	-5.80998
UAUGU	UA-rich_d1	2.36731	2.29542	2.4392	1.05533	0.767747	1.34291	0.679766	0.514144	0.845387	2.01196	1.77045	2.25346	0.357818	0.26046	0.455176	-1.50091	-1.90805	-0.853432	-4.92684	-0.835148	-3.32651	-5.94246	-2.28312	-3.82337	-4.50719	-2.7685	-6.57901	-5.3622	-5.0627	-1.65873	-3.08213	-3.77111	-5.00404	-1.56504	-3.18016	-4.59787	-5.4024	-4.41672	0.0408183	-0.976525	-3.28318	-8.84845	-2.76605	-3.78452	-1.20985	-6.22206	-5.55202	-3.5628
UAUUU	UA-rich_d1	1.5249	1.48347	1.56632	1.36207	1.24413	1.48002	1.55018	1.47979	1.62056	3.66303	3.53703	3.78902	1.19368	1.14123	1.24614	0.395303	-3.39543	-1.48254	-2.83508	-2.95654	-3.75941	-4.54696	-3.15797	-3.54937	-3.30701	-4.92479	-5.70719	-3.69043	0.354177	-4.12596	-2.8666	-3.13772	-2.33543	-1.72392	0.92408	-1.6198	-1.6844	-3.565	-4.64562	-1.17001	-2.78178	-1.74642	-1.60939	-2.50689	-4.43519	-3.05466	0.559856	4.26212
UCAUU	U-rich_d2	0.351974	0.318792	0.385156	0.425832	0.342199	0.509464	1.08205	1.00389	1.16021	4.32002	4.09005	4.55	0.936776	0.845443	1.02811	0.430644	-0.0742005	-0.297239	0.293406	-0.0669905	1.02573	0.0562582	1.46273	0.866182	-0.426773	1.27947	0.882155	0.237932	-1.4886	5.08683	-1.15784	1.84911	4.63528	1.59903	-0.716264	-0.228905	2.00705	-0.560447	1.12827	0.466706	1.45669	0.00708765	0.474132	1.14978	1.4664	2.71608	-0.161337	1.83989
UCUUU	U-rich_d1	0.560131	0.527469	0.592792	0.265322	0.133585	0.39706	1.55323	1.47023	1.63623	3.24011	3.10379	3.37643	1.55922	1.49479	1.62365	-0.375562	-0.259835	-0.815004	-0.745631	-1.74567	-1.24645	-2.72183	-3.53248	-2.13778	-1.91036	-3.24629	-2.77225	0.168745	-1.8893	-0.0518545	3.33521	1.82631	1.84337	5.09388	0.351174	1.17727	2.35888	1.30553	-0.426246	1.92578	-1.07429	1.29669	0.723589	1.11994	-0.588184	-1.78751	1.42068	1.43127
UGAAA	A-rich_d2	0.104989	0.0812662	0.128712	1.51541	1.39777	1.63304	-0.0592745	-0.180674	0.062125	3.53178	3.20119	3.86237	0.31412	0.230911	0.397329	4.60473	8.7451	9.30857	15.5323	23.8367	19.2453	17.7768	25.0445	21.6809	22.3646	30.7419	33.6268	30.7516	25.3269	14.1136	9.1572	21.4069	22.8818	19.9259	34.7581	15.9395	21.4374	30.1572	32.7751	28.5023	33.0509	22.4548	21.6345	22.7027	22.5203	20.7828	28.0969	25.8011
UGAAG	NA	0.132176	0.0946666	0.169685	0.700707	0.54388	0.857534	-0.125974	-0.269805	0.0178574	2.43205	1.99945	2.86464	0.166582	0.0686735	0.26449	10.0409	14.1511	9.92654	17.121	23.9379	26.1926	25.7913	38.2076	24.6414	28.2984	31.0249	15.4256	29.8544	31.9888	19.6916	26.6729	21.1469	28.542	30.3794	26.7479	17.8859	21.6566	24.959	34.4213	27.7766	29.7517	23.3243	27.866	27.2676	27.3951	27.0078	32.4026	25.5213
UGUAU	UA-rich_d1	2.25858	2.20042	2.31674	1.06573	0.859206	1.27225	0.677443	0.542832	0.812055	1.88016	1.63745	2.12288	0.513181	0.428347	0.598015	-1.05744	-1.59004	-1.21664	-2.37729	-4.41089	-2.84376	-3.69953	-5.48985	-5.26593	-2.49601	-1.9675	-3.60923	-3.55917	-1.38929	-2.80343	-3.59135	-3.17774	-1.56456	-1.29007	-4.7308	-6.04858	-2.66451	-3.79223	-2.77949	-4.66727	-1.64158	-3.10094	-1.5913	-5.38755	-3.47205	-2.30566	-3.94411	-3.82511
UUAUA	UA-rich_d1	2.28277	2.22678	2.33876	1.82002	1.69839	1.94164	0.778602	0.689835	0.867368	3.54446	3.36491	3.724	0.536203	0.467689	0.604717	-1.78694	-3.98098	-2.13473	-2.9428	-3.52872	-4.53086	-1.79923	-4.11217	-6.14707	-4.66728	-5.00583	-0.737317	-7.78402	-5.03303	-1.82426	-5.07226	-3.21811	-3.29243	-4.33161	0.496145	-4.82115	-1.65568	-4.12978	-4.01162	-0.972132	-5.37556	-2.56724	-4.2275	-5.81673	-6.1307	-5.07058	-4.17292	-7.02882
UUAUU	U-rich_d1	0.894571	0.858742	0.9304	0.918265	0.835117	1.00141	1.49749	1.43272	1.56227	3.64883	3.51269	3.78497	1.1402	1.07951	1.20088	-1.02611	-1.50949	-3.01159	-3.03255	-5.12798	-6.27482	-3.99523	-2.17687	-5.65638	-7.28422	-3.89709	-5.66798	-2.71722	-1.42096	-0.0172918	-3.67667	0.0505751	-1.64071	6.66411	1.16712	0.140915	1.63433	4.1246	-3.48845	1.23655	-1.1023	3.01304	-3.96262	-4.79706	-3.64328	-0.0309935	-2.40987	-2.10869
UUCAU	U-rich_d2	0.600008	0.561296	0.638719	0.483541	0.365724	0.601358	0.995293	0.918343	1.07224	4.43859	4.18151	4.69568	1.09827	1.02548	1.17105	0.142412	0.252925	1.05026	-4.10671	-0.984986	-0.721436	-0.380261	-1.6815	-2.60159	0.723033	2.48786	-0.643303	-2.55992	0.944932	-2.79869	-1.32734	2.81022	-0.234413	0.0914219	-1.09457	0.920826	-1.07899	1.47863	-1.42643	2.49191	1.76994	1.91559	1.51055	-1.14778	1.79949	0.271687	0.632284	1.85509
UUCUU	U-rich_d1	0.461625	0.434268	0.488982	0.0221452	-0.0791568	0.123447	1.5301	1.44963	1.61057	3.24942	3.11884	3.38	1.65762	1.59157	1.72368	0.129058	-0.0389808	-2.44038	-0.874413	-4.59143	-5.29968	-3.86533	-4.54222	-3.56421	-3.49133	-2.45448	-5.15492	-5.08768	-2.60402	-1.76497	3.29367	-1.30819	5.26674	2.44288	5.14613	0.844371	3.49428	0.118616	2.07007	-4.2848	-1.50398	-0.0418523	0.64194	0.130566	-0.14318	0.227327	-1.00097	3.64087
UUGAA	NA	0.108541	0.0807994	0.136283	1.23549	1.11427	1.35671	0.381339	0.269716	0.492961	4.04782	3.71168	4.38395	0.595391	0.526591	0.664192	9.11218	8.14713	11.5324	17.6656	23.7338	17.5466	36.0934	21.3916	14.3887	38.1763	25.203	31.6001	34.1848	14.7868	12.9357	18.8195	26.3911	25.0759	30.4683	20.8929	26.1384	28.6329	22.2884	22.6136	39.1849	23.5173	21.8091	29.8337	21.1296	20.2945	19.3382	20.8305	26.7173
UUUAA	UA-rich_d2	1.03494	0.988607	1.08127	2.58257	2.49054	2.67461	0.801693	0.706303	0.897083	4.42143	4.17455	4.6683	0.573012	0.512153	0.633871	-0.506996	-2.74637	1.02717	-2.9272	-2.221	1.37814	1.19035	-2.07161	-3.96537	-0.0228711	0.58114	0.672723	-1.10406	-1.57316	-4.52855	-0.991874	0.930995	-0.581857	-0.80798	1.77513	-0.993858	1.21081	3.38247	0.431479	-0.889339	-2.81551	-1.87426	-3.44962	-4.84322	0.643459	-1.7619	-0.550411	-4.01597
UUUAU	UA-rich_d1	1.74881	1.70338	1.79423	1.2166	1.09784	1.33537	1.39722	1.32832	1.46612	3.58471	3.41463	3.75479	1.33168	1.2721	1.39126	-2.21375	-1.67296	-1.83213	-3.70157	-7.25901	-1.62281	-3.86045	-3.44807	-4.56507	-3.83611	-3.66313	-4.32177	-6.43001	-3.22237	-6.43625	-0.728414	-3.02767	4.05765	0.742328	-3.55359	-4.40552	0.881882	-1.0275	-0.103402	-5.13804	-2.68804	-3.12169	-4.12659	-3.11227	-2.56576	-3.12913	-3.33165	-4.66082
UUUCA	U-rich_d2	0.272356	0.245726	0.298986	0.82533	0.6961	0.954559	0.947059	0.8534	1.04072	5.14873	4.93435	5.3631	1.16787	1.10787	1.22788	-0.135009	3.98969	0.339633	2.96552	4.53366	-0.393321	1.44167	1.12083	2.86605	2.11354	3.19155	3.46782	2.31633	-0.474237	0.776981	1.91843	4.22405	4.60324	5.29987	6.82151	2.40098	4.71202	3.84027	3.5279	0.836543	2.64336	3.9304	-0.955944	5.67368	2.30175	2.7098	5.53887	3.82941
UUUCU	U-rich_d1	0.479227	0.450013	0.50844	0.181616	0.0732792	0.289953	1.39059	1.32328	1.45791	3.54419	3.40268	3.6857	1.71572	1.65582	1.77562	-0.923274	-1.61286	-1.93193	-2.17989	-6.02467	-8.54841	0.823848	-5.69147	-3.36587	-2.4771	-3.36351	-5.66378	-3.42234	-2.7598	-0.723703	-0.474417	1.86724	-0.799272	1.7209	-0.739662	2.07012	1.14268	-0.621713	-1.27487	3.32048	-1.19814	-0.0670208	-2.62138	2.01327	-0.746313	0.0864697	1.57682	0.946634
UUUUA	U-rich_d1	1.08841	1.05156	1.12526	1.61171	1.51677	1.70664	1.17892	1.10576	1.25208	4.78738	4.62615	4.94861	1.40775	1.34924	1.46627	-1.81495	-1.16454	-5.75041	-8.10722	-2.01561	-3.92456	-2.87119	-5.88016	-6.15181	-4.91076	-2.13616	0.37513	-2.35789	-4.63569	1.15323	4.56949	1.86724	1.05906	0.781575	1.48934	4.24083	-0.0384103	-0.281457	-2.82581	-3.60862	-1.16095	0.0164702	-3.32614	-0.20329	1.84154	-1.56174	-2.50784	1.99528
UUUUC	U-rich_d1	0.308433	0.285139	0.331726	0.157243	0.0455343	0.268952	1.34396	1.26491	1.423	4.23752	4.09455	4.38049	1.82545	1.76788	1.88301	0.74077	-0.11245	-0.570366	-0.645316	-3.42038	-1.54703	-1.64976	-1.12194	-0.0821738	-4.18854	0.0179536	0.674928	-1.13306	2.05864	0.336664	6.03142	1.466	6.48731	2.05667	4.17907	6.06203	6.04086	2.18446	2.53935	0.796863	1.9151	-0.476148	4.76939	0.821874	-0.250584	5.38435	4.86361	5.12879
UUUUG	U-rich_d1	0.486341	0.448376	0.524306	0.344911	0.227799	0.462023	1.30715	1.23161	1.38268	3.16358	2.98952	3.33764	1.55442	1.48335	1.62548	0.495437	2.86953	5.8	4.07841	0.823589	0.305475	8.96563	7.10364	5.83558	10.6463	6.95109	1.15832	4.69589	3.40568	9.8324	13.1452	13.1313	4.64503	6.12681	7.40889	4.53482	10.5555	14.2888	9.24549	5.09959	4.72364	6.34362	4.12952	7.76903	10.2934	8.07897	8.22925	7.28215
UUUUU	U-rich_d0	0.669056	0.648751	0.68936	0.847368	0.760782	0.933954	2.02939	1.9725	2.08628	3.36852	3.26573	3.47132	2.2507	2.20906	2.29234	-1.68789	-2.77296	-4.60658	-4.91204	-1.75141	-7.15114	-3.33581	-3.84227	-4.17175	-2.04531	-3.02161	-2.78652	-4.42388	-0.587718	5.26805	7.95378	8.57695	9.07784	11.264	13.7089	11.0158	12.0332	5.78418	9.38694	5.48368	3.14516	7.90157	4.78036	7.26845	6.96145	4.24864	5.50954	2.60566
[truncated: 468 more columns]

## Sheet: 6mer motif importance
		[-120, -25) region			[-25, -15) region			[-15, -5) region			[-5, 2) region			[2, 15] region			Sum importance profile
Motif	Family	Mean importance score	95% confidence interval: Lower bound	95% confidence interval: Upper bound	Mean importance score	95% confidence interval: Lower bound	95% confidence interval: Upper bound	Mean importance score	95% confidence interval: Lower bound	95% confidence interval: Upper bound	Mean importance score	95% confidence interval: Lower bound	95% confidence interval: Upper bound	Mean importance score	95% confidence interval: Lower bound	95% confidence interval: Upper bound	-250	-249	-248	-247	-246	-245	-244	-243	-242	-241	-240	-239	-238	-237	-236	-235	-234	-233	-232	-231	-230	-229	-228	-227	-226	-225	-224	-223	-222	-221	-220	-219	-218
AAAAAA	A-rich_d0	0.318309	0.291855	0.344764	2.14472	2.00292	2.28651	0.160081	-0.114023	0.434186	0.878167	0.39187	1.36446	0.84265	0.760955	0.924344	2.649	2.01374	2.44641	3.57026	7.06693	10.4672	9.64477	9.0014	14.5918	10.0756	8.25719	7.2084	6.91849	6.80522	7.5599	3.05791	3.34735	-2.25017	6.67519	9.79802	9.10794	8.66366	9.83867	12.3797	19.9917	22.342	27.5758	14.8218	17.8279	18.0135	21.6781	18.5285	22.3001
AAAAAG	A-rich_d1	0.272937	0.23058	0.315295	1.80019	1.57973	2.02066	-0.112014	-0.552159	0.328131	1.58868	0.758285	2.41908	0.497305	0.3522	0.64241	1.47236	5.91046	2.44836	3.43455	3.29216	7.53912	5.23524	12.9556	10.5775	9.87323	9.16344	5.03579	8.2866	11.921	13.2186	6.65444	6.5403	4.0322	8.84808	13.7243	13.7738	10.5359	9.05383	12.1345	13.6453	21.5483	13.5593	18.2275	8.59692	7.97159	9.4395	16.1665	5.73023
AAAAAU	A-rich_d1	0.538994	0.489208	0.588779	2.57067	2.42183	2.71951	0.988673	0.760901	1.21644	1.44208	0.984663	1.89951	0.306411	0.223138	0.389683	0.678488	-1.24511	1.17996	4.73937	2.55756	3.04795	6.87061	2.78206	6.96844	4.62633	6.12778	3.19214	6.85715	7.83186	3.99587	1.84212	3.94836	1.35164	2.60267	4.07458	5.80305	4.77638	5.08493	5.04545	4.97643	9.18032	9.73903	7.85831	8.16998	6.02763	6.30152	9.4265	10.8583
AAAAGA	A-rich_d1	0.305723	0.264	0.347447	1.72648	1.53472	1.91825	-0.24316	-0.755848	0.269527	2.10227	1.45106	2.75349	0.502769	0.356458	0.64908	2.76449	3.33664	7.94185	5.91499	6.28396	5.34187	8.5565	7.55573	15.5085	13.3912	7.00589	6.50505	7.27855	7.68299	12.2078	6.72084	10.0662	3.43846	2.13884	9.53041	12.4846	14.4511	10.0697	7.63418	15.5742	14.2068	17.5358	15.1942	11.9274	10.0427	7.18755	18.6341	12.4753
AAAAGG	A-rich_d2	0.244101	0.189447	0.298755	1.14668	0.789844	1.50352	-0.25779	-0.91694	0.40136	2.05587	0.471123	3.64062	0.243689	0.0685903	0.418787	3.05485	1.97187	3.57213	9.86544	5.12012	9.20604	10.9078	8.94401	5.02475	10.5776	11.7711	6.58933	12.2723	12.6238	17.5559	12.2321	4.00347	6.19814	11.3945	12.9126	9.42299	10.8868	5.58033	13.193	12.2864	13.7066	11.5564	10.9847	11.865	14.7477	14.7723	6.08938	7.08544
AAAAUU	A-rich_d2	0.611848	0.546308	0.677387	2.61449	2.4724	2.75659	1.45072	1.26075	1.64069	2.18505	1.72044	2.64965	0.392929	0.31816	0.467699	0.202903	1.9993	3.23289	3.23801	4.27415	5.33343	5.74983	4.3602	6.01261	8.42877	6.33133	5.71004	-1.48443	1.80118	6.66147	5.02917	4.51919	2.86517	4.2202	1.46913	4.719	7.60788	3.03782	6.7682	4.50012	6.65802	7.41336	7.75494	2.83048	8.74348	5.45896	5.06005	6.73178
AAAGAA	A-rich_d1	0.329049	0.287617	0.370481	1.83484	1.6514	2.01829	-0.0723089	-0.537868	0.39325	2.40031	1.91392	2.88671	0.771216	0.628313	0.914119	6.22465	6.94574	7.31279	12.4407	11.356	15.3565	13.2462	16.1322	12.5114	21.046	14.8082	11.7789	11.5271	15.6791	12.0403	17.0539	12.0348	12.1108	9.12797	6.83733	12.1393	14.8756	18.3507	17.2637	17.2648	14.5447	15.2063	22.3735	21.0249	21.6679	15.7742	15.7071	21.482
AAAGGA	A-rich_d2	0.353243	0.283453	0.423034	1.1979	0.904131	1.49166	0.0232625	-0.667853	0.714378	2.26189	1.34987	3.1739	0.324082	0.11861	0.529553	2.58309	4.99385	3.92911	2.22045	6.25781	8.70212	7.38735	11.1493	3.13685	4.98159	7.96259	5.17728	7.88949	7.85019	8.36324	14.0617	2.53839	5.44155	5.40736	12.8003	8.36773	7.22223	7.27412	9.85334	11.5802	7.84797	10.1148	12.4942	15.6801	14.1048	10.6633	10.8267	6.12182
AAAUAA	A-rich_d1	1.83325	1.75002	1.91648	2.86581	2.66955	3.06208	0.499837	0.140526	0.859147	2.37729	1.98063	2.77395	0.0882634	-0.0463489	0.222876	-0.846038	0.428442	-0.373214	-1.34389	-1.34035	-0.00506982	-0.00844935	-1.19104	2.43489	0.503527	-0.0295644	-3.43433	0.113227	-5.09103	-0.198831	0.0209617	-3.6481	-1.76956	0.175521	-1.9863	2.08148	-3.1004	-0.584978	0.565687	1.88767	-0.485176	0.720276	0.615724	1.93296	0.0739071	3.32042	-1.03184	-0.525104
AAAUAU	UA-rich_d1	2.07388	1.97577	2.172	2.4806	2.29205	2.66916	1.0927	0.884565	1.30083	2.6902	2.23899	3.14141	0.179129	0.066983	0.291275	-1.04263	-0.551435	-1.40565	-2.56876	-0.0792174	0.311384	-2.13694	0.444221	1.47064	-1.34175	0.0398302	0.663328	0.0866758	0.627335	0.73721	1.66794	-2.70549	-2.69722	0.567342	0.7585	-1.29572	-1.10563	-2.73675	-1.2994	-1.43615	3.49776	2.70672	0.366596	-1.26061	-1.35931	-2.14874	-1.10494	-1.41065
AAAUUU	UA-rich_d2	0.858569	0.775253	0.941885	2.66036	2.48428	2.83643	1.82471	1.65899	1.99043	3.63924	3.17064	4.10785	0.67652	0.562007	0.791033	2.69726	0.183055	0.944051	2.6747	4.95001	4.68412	5.80244	5.34466	3.81299	5.8721	1.43087	5.87854	5.71546	7.16483	3.36941	4.21192	4.99412	3.35857	2.18605	3.09874	0.721485	6.48215	2.72232	4.78524	4.34153	2.89386	4.40279	6.33351	4.28031	2.84219	2.65228	3.2416	2.2477
AAGAAA	A-rich_d1	0.385354	0.338999	0.43171	1.95324	1.75539	2.15108	-0.0463789	-0.588061	0.495303	1.53701	1.1242	1.94982	0.735105	0.602231	0.867979	4.88824	7.35104	8.93013	13.4649	9.24871	13.5645	13.02	13.2744	12.7719	20.5068	13.7685	20.8363	12.4108	12.0692	12.789	11.4623	16.6106	18.7255	13.3521	12.4869	15.365	15.6722	15.1598	19.884	13.554	16.5032	17.1612	17.7723	26.8523	16.317	18.5269	22.6811	24.5728
AAGAAG	A-rich_d2	0.333687	0.289584	0.37779	1.25028	0.980296	1.52026	0.00347992	-0.338565	0.345524	1.81078	1.20154	2.42003	0.263316	0.0581934	0.468438	8.83926	11.7464	8.40804	12.7284	13.6917	19.8491	29.0694	28.036	24.3055	10.853	31.06	14.3275	16.1836	23.5107	17.8394	18.1893	8.62497	7.51641	10.3571	15.107	19.3735	21.5618	17.2708	21.3436	31.8323	19.7269	18.0637	26.6747	31.1357	28.7036	28.6676	15.6384	32.6238
AAGAGA	A-rich_d2	0.25286	0.204613	0.301107	0.783705	0.447872	1.11954	-0.282415	-0.759579	0.194749	1.28172	0.478033	2.08542	0.265183	0.030573	0.499794	4.86738	2.66291	5.65968	6.36219	6.92982	12.8651	4.68126	9.83732	5.67987	10.3826	10.9082	10.4039	7.63319	4.65033	4.69426	5.25868	8.15183	6.14185	5.84922	4.81065	8.64805	6.28423	2.25497	9.18414	-3.29768	8.53396	10.3468	13.9117	11.0015	10.0478	6.70932	11.7715	3.17066
AAGGAA	A-rich_d2	0.280861	0.226717	0.335006	1.46017	1.20194	1.7184	0.204048	-0.121641	0.529738	1.33089	0.502563	2.15922	0.655285	0.385288	0.925283	3.73873	8.04039	9.81711	8.88335	5.29426	10.1699	11.0969	8.84531	14.5907	5.28305	8.74996	6.73557	9.83335	8.36747	14.0159	8.82729	11.9683	5.42103	14.1288	7.51891	16.6263	12.1683	11.7238	10.8199	11.034	9.98613	15.2654	14.5452	15.8491	20.9348	11.9624	19.2859	6.15846
AAUAAA	A-rich_d1	1.32214	1.24572	1.39857	2.95866	2.79177	3.12555	0.419146	0.159873	0.678419	1.78758	1.46242	2.11274	0.220594	0.0942089	0.34698	0.915521	-0.121412	1.37429	0.55728	1.32926	-0.804294	0.711949	0.280113	-0.372337	2.95834	2.84136	-0.722391	-1.55142	-0.77133	-1.02273	1.60368	-0.536801	-0.448375	0.503684	-0.453898	-0.974318	1.59983	-0.717906	1.21483	1.09913	2.3753	0.0880162	1.12565	1.51277	-0.0744038	-0.0769864	2.21341	0.10531
AAUAAU	A-rich_d2	1.35265	1.26822	1.43709	3.34022	3.1607	3.51975	1.1365	0.919221	1.35377	1.5734	1.25518	1.89161	0.0405936	-0.0770948	0.158282	-0.383916	-1.69833	1.43731	-0.953128	-1.52646	-0.0159763	-1.10241	-2.1344	-1.09398	0.325733	-0.447776	-1.27895	-3.14115	-0.819279	-3.92853	-0.82097	-0.6346	-1.62822	-0.872297	-2.67893	-0.0933071	0.961294	-1.64024	-0.454039	-0.6386	-1.65709	0.202238	0.610788	-0.15542	0.286321	-0.804731	-1.32912	-0.309709
AAUAUA	UA-rich_d1	2.38342	2.29145	2.47539	2.61927	2.41268	2.82585	0.562366	0.28542	0.839312	1.95589	1.6173	2.29449	0.0524076	-0.0992042	0.204019	-0.813917	-2.81234	-2.54204	-1.21087	-1.90894	-0.516301	-0.493079	0.565344	-1.30294	-0.390784	-3.67299	-0.569915	-0.673707	-1.80724	-1.79377	-0.839188	-0.14032	-0.409321	0.39686	-0.348924	-0.218346	-0.84321	-1.70892	-1.83361	-3.66491	-1.25946	2.36633	-0.438266	-3.70604	-1.30054	-4.59811	-4.99294	-0.05671
AAUUUU	U-rich_d2	0.920677	0.847038	0.994315	2.39782	2.22953	2.5661	2.38957	2.25199	2.52715	4.07631	3.74526	4.40735	1.30421	1.19294	1.41548	0.0081391	-1.48313	0.232518	-0.495798	2.54459	2.21817	0.607448	4.95065	1.75012	1.64577	3.37023	0.52571	6.87788	5.01902	2.39582	2.82627	3.18068	1.82933	2.57426	2.22209	2.77894	0.0683407	2.98542	1.25715	0.620488	3.1344	0.844119	2.2982	2.69428	-2.73019	2.71223	1.82283	2.87938
ACAUAU	UA-rich_d1	2.50847	2.40679	2.61016	1.55258	1.20524	1.89992	0.467099	0.238932	0.695266	2.35242	1.84523	2.85962	0.254235	0.0525504	0.455919	-0.182949	-0.386004	2.49257	-0.332314	0.00778037	0	-1.89193	0	-1.05574	-0.912628	-0.321691	-2.66713	0.0396561	0.0806025	-0.954551	-0.615798	-1.25152	-1.17806	-0.378944	0	-1.44053	-0.435778	-0.733815	2.84741	3.72502	-0.18892	-0.0678941	-1.1227	-0.807552	-2.13081	-0.139006	0.744472	-1.10485
ACUUUU	U-rich_d2	0.804065	0.715398	0.892732	1.57113	1.36991	1.77235	2.04439	1.86356	2.22523	3.75926	3.38292	4.1356	1.28252	1.14281	1.42223	3.48534	-0.409785	0.329137	-0.530533	3.37999	-1.24537	-0.100113	-0.133578	0.161119	0.59156	0.582894	-0.0540147	2.05804	1.91422	0.859057	1.21671	1.89551	1.0942	0.777161	1.14168	1.43724	1.38435	-0.314411	-0.21056	1.3857	0.202418	0.615539	0.514626	0.57649	1.20808	0.501686	1.13892	0.552788
AGAAAA	A-rich_d1	0.467668	0.410737	0.524599	1.75288	1.56939	1.93636	-0.537216	-0.962676	-0.111756	1.3184	0.907941	1.72886	0.565121	0.433666	0.696577	2.4191	5.10361	4.59845	8.04505	7.17574	7.4452	11.0127	7.81503	8.54213	5.46251	14.0633	10.3616	13.4903	4.37953	6.69455	3.85196	8.35156	7.49229	12.9206	10.1386	6.94997	12.9335	9.88848	11.8774	20.3216	11.1789	11.6531	8.06574	9.72269	10.3202	8.75877	11.7459	16.1924
AGAAAG	A-rich_d2	0.273857	0.208475	0.339239	1.05896	0.805457	1.31246	-0.534583	-1.03321	-0.03596	1.22791	0.727164	1.72866	0.341513	0.144354	0.538672	2.17042	3.99913	5.24144	10.8584	4.23581	10.139	10.8496	8.30134	11.3771	6.56611	9.24361	4.00142	8.7277	5.83178	6.76719	6.43983	5.94349	9.82262	7.19848	5.90437	7.96354	6.69866	9.38748	9.41457	8.75107	6.31196	10.5195	8.85791	13.3596	9.72105	7.53779	6.95562	10.5923
AGAAGA	A-rich_d2	0.349551	0.289328	0.409774	0.797937	0.465906	1.12997	-0.237646	-0.601338	0.126046	1.71766	1.25372	2.18161	0.200325	-0.028612	0.429262	3.42566	8.76093	14.2159	15.1494	8.76829	11.165	13.9033	21.5652	22.2337	20.7553	10.2528	16.8389	13.1005	14.9881	17.2424	8.88392	12.359	6.05978	8.09074	12.6513	15.1434	13.2639	20.3293	16.4381	14.6184	19.8816	24.6046	14.1643	20.5894	22.6871	23.9657	22.4405	7.63638
AGAAGG	NA	0.357119	0.279877	0.434361	1.02912	0.757759	1.30048	-0.778669	-1.36675	-0.190587	2.01149	0.607155	3.41582	0.114036	-0.0821319	0.310203	2.82497	5.84811	3.10988	4.32475	5.20799	10.1363	6.6702	5.96217	13.1062	7.77665	8.14609	11.5929	9.85333	5.56113	12.8756	7.53982	6.62085	5.51043	0.673643	3.66825	9.9298	10.8021	7.30096	9.78036	6.72136	13.7606	10.8219	7.56051	9.80664	10.3821	8.44929	6.93667	8.51247
AGGAAA	A-rich_d2	0.300746	0.242932	0.358559	1.11063	0.83354	1.38773	-0.307467	-0.732156	0.117223	1.34024	0.879606	1.80087	0.55072	0.375238	0.726201	3.29158	2.51564	5.54757	7.60432	6.62825	4.25365	6.02125	5.36178	5.22628	7.50588	6.18767	7.10896	7.51396	3.11211	4.29758	2.76658	11.2528	6.9148	2.69678	7.84681	8.58203	9.1825	9.95547	10.5673	9.77047	7.67467	7.5752	17.0063	11.2898	4.81078	10.0814	11.8178	11.2766
AUAAAA	A-rich_d1	1.26426	1.18497	1.34354	2.89251	2.73954	3.04548	0.178864	-0.0688399	0.426567	1.71436	1.31288	2.11584	0.308265	0.192413	0.424116	-0.509065	1.45378	0.61226	1.24665	1.35738	0.13949	1.76808	0.386977	-0.485293	1.99127	0.0506033	0.353825	-0.417419	0.889776	-1.02865	-1.04233	0.0374949	0.0100361	-1.57586	1.94079	-1.04937	2.07644	3.78288	2.95492	1.82385	2.41743	1.3163	1.76503	-0.408516	2.33932	0.0893887	3.14642	1.37948
AUAAAU	UA-rich_d1	2.55569	2.45695	2.65443	2.68632	2.49847	2.87416	0.502459	0.2599	0.745018	2.55373	2.09259	3.01486	-0.0681353	-0.219705	0.0834342	-0.144051	-1.84234	0.576091	0.106352	-0.0978119	-0.614526	-1.31309	-1.09111	-0.167646	-2.41659	0.320112	-0.32927	-1.94452	-0.397666	-2.57103	-0.907121	0.119914	-1.54722	-0.213385	-1.68068	-0.627147	-2.00607	-1.10999	-1.2593	0.0677196	-0.323886	-3.38625	-0.46456	0.279999	1.01846	-1.97833	-2.37734	-2.52378
AUAAUA	A-rich_d2	1.96893	1.87285	2.06501	3.15632	2.99442	3.31822	0.719665	0.506843	0.932488	1.83037	1.57476	2.08598	0.0829205	-0.0276602	0.193501	0.668802	-0.837495	-1.33746	-0.011423	-2.55533	-2.81834	-0.939159	0.114963	-1.53081	-1.34459	-0.347529	-0.92672	-1.38631	-3.51146	-0.734279	-2.24332	-2.8281	-0.911532	-2.59493	-0.367842	-0.866318	-3.62028	-2.02466	-3.29244	-0.64105	-0.446415	-0.639355	-1.53561	-0.698949	-0.507404	-1.07125	-2.31716	-2.57377
AUACAU	UA-rich_d1	2.7136	2.61239	2.8148	1.44506	1.16423	1.7259	0.308087	0.0575875	0.558586	1.59478	1.22493	1.96463	-0.0517423	-0.256368	0.152883	0.116591	-0.486199	-2.66128	-0.510885	0.106131	-0.885732	0	-1.81835	-0.988477	-0.273999	-1.53674	-0.713916	0.586389	0.514172	-0.133991	-1.2026	-0.255463	-0.154693	2.23906	-0.602493	0	-0.15708	0.231996	0.0229757	0.0298399	0.305821	-0.617975	0.0321656	0.689043	-1.3179	-0.381583	-0.206344	-0.696572
AUAUAA	UA-rich_d1	3.13634	3.04268	3.23	2.89848	2.69389	3.10307	0.458312	0.193049	0.723574	2.65546	2.22522	3.0857	0.188378	0.0494538	0.327302	0.00453412	0.105561	-1.17121	-1.15969	-0.916141	-0.923225	-2.35045	-1.19178	-1.62505	-0.720168	-0.503094	-1.02843	-2.57725	-0.603744	-0.0940074	-1.99603	-1.79618	-0.00975033	-3.1164	-2.23453	-0.127143	0.748899	1.15946	-0.651226	-2.00939	-4.7122	-1.34127	0.910422	-3.50123	-3.62017	-2.05159	-3.42714	-1.83489
AUAUAC	UA-rich_d1	2.82883	2.73059	2.92707	1.82038	1.5023	2.13846	0.0717615	-0.190655	0.334178	2.13244	1.59647	2.66841	0.124016	-0.0586416	0.306673	-0.40622	-0.943683	-0.399769	-1.55992	-1.49278	-1.13486	0.299228	0.675866	-0.344397	-0.641117	-2.38806	-2.57256	-1.1854	-0.148399	-0.312202	-1.13061	-1.28386	0	-0.480853	-1.10672	0	-0.790368	-0.184093	-1.43797	-0.967101	-1.16507	0.615562	0.34538	-0.0625944	-1.34922	-0.274289	-2.64528	-1.50403
AUAUAG	UA-rich_d1	3.34794	3.21373	3.48214	2.30867	1.79711	2.82023	0.147557	-0.200759	0.495873	1.14846	0.174994	2.12192	-0.0202111	-0.191302	0.15088	-0.490847	-0.386018	-1.928	-0.81548	-1.65973	-0.637922	0.0121411	0.194448	-1.69581	-0.0915997	-0.264703	-2.23166	-0.10754	-1.96557	-1.60113	-0.84481	-0.0916038	0.48289	-0.476347	-0.758171	-0.159186	-0.103782	-2.30136	-0.682359	-0.45448	0.110942	-2.54325	0.263372	-0.442047	3.04187	-1.24129	-0.528966	-3.61552
AUAUAU	UA-rich_d0	3.01214	2.94996	3.07432	1.42152	1.14329	1.69975	-0.00442733	-0.318904	0.310049	1.15563	0.62975	1.68151	-0.231826	-0.451219	-0.012432	-0.325015	-0.498308	-2.03147	-1.63467	-2.0489	-1.49398	-0.515687	-0.673982	-0.89847	-0.49324	-1.6185	-0.685654	0.218879	-2.52116	-1.15999	-2.31571	-1.81816	-0.14692	-0.193024	2.07631	0.52182	-0.607691	-5.33743	-0.245599	-1.92868	3.3486	-1.96127	2.52334	-0.513094	-2.97297	0.462229	-2.80505	-0.148006
AUAUGU	UA-rich_d1	2.55795	2.44583	2.67006	1.23041	0.847871	1.61296	0.657676	0.252049	1.0633	3.25984	2.52896	3.99072	0.183658	0.00842719	0.358889	-0.909245	-0.403756	-2.09215	-0.896652	-0.955847	-1.9328	-0.914245	-0.343571	0.0606063	-1.11083	-3.87483	0	-0.539088	-0.887475	0.353181	0	-0.567281	-0.914874	-0.435283	-2.95365	-0.663933	-0.133456	-0.414868	0.047835	-0.373732	-3.14221	-0.654004	-0.567911	-0.257516	-1.03867	-0.810717	-1.70063	-0.325016
AUAUUU	UA-rich_d1	2.10599	2.02372	2.18826	2.11244	1.90597	2.3189	1.84324	1.70053	1.98594	3.30189	3.03017	3.5736	1.0922	0.99522	1.18917	-1.46003	-0.27333	-0.180007	-1.08793	0.06787	-1.07457	-1.22184	0.00345476	0.700024	-0.784153	-0.380164	-0.500408	-0.791219	-0.505899	-1.57814	1.62036	-0.179752	-0.460652	-0.977291	-0.796748	1.2064	-0.362158	0.105461	-2.4141	-2.22491	-0.427418	-1.05799	0.413095	-2.07065	-1.75165	0.324736	1.92616	-0.322441
AUGAAG	NA	0.213896	0.139113	0.288678	0.970893	0.719169	1.22262	-0.285897	-0.607741	0.0359471	1.81986	1.31237	2.32734	0.272589	0.073408	0.471771	3.07319	3.40033	6.31186	6.86097	4.32957	6.46095	12.8692	7.71524	11.72	8.99068	0.839631	8.35484	11.7336	8.83493	10.2026	3.95279	8.24143	10.6149	6.69395	4.16879	4.39165	9.86071	16.2547	13.6498	3.2025	6.12387	5.24929	6.98365	10.6706	4.93788	14.3061	10.9854	11.4336
AUGUAA	UA-rich_d2	2.84032	2.69559	2.98505	2.97114	2.51764	3.42464	0.306731	-0.00571092	0.619172	3.75147	3.25581	4.24714	0.126185	-0.125344	0.377713	0.00533807	-1.73925	-0.488479	-0.425592	-0.419935	0.61159	-0.416759	-0.599204	0	-1.41388	-0.275812	-0.531184	-2.0754	0	-0.295605	-0.293101	-0.099717	0	-0.704017	-0.165035	-0.0717633	-0.0457892	-0.799994	-1.70673	-0.0906543	-0.771898	-1.077	-1.49095	0.433768	-3.08823	0	-0.988429	-0.915078
AUGUAU	UA-rich_d1	2.8701	2.77001	2.97019	1.49586	1.0867	1.90501	0.455009	0.102508	0.80751	1.52249	0.822069	2.22291	0.289897	0.0761203	0.503674	-0.632616	-0.147019	-0.828153	-2.43991	-0.130245	-1.15881	-2.25269	-2.22188	-1.3895	-0.597061	0	-0.372779	0	-1.48381	-1.77113	-0.512235	0.736527	0	-2.8698	-1.54975	0	-2.07139	-1.21098	-1.72152	-0.833501	-1.16017	-0.370712	-2.16481	-1.08493	-0.596601	-1.25898	-0.811672	-2.10225
AUUAUU	U-rich_d2	1.03312	0.960427	1.10581	1.47591	1.32215	1.62966	1.82407	1.69511	1.95303	2.44611	2.25185	2.64037	0.941726	0.829076	1.05438	-0.284314	-1.02911	-1.18258	-0.541204	-2.33715	-0.758714	2.06757	-0.976512	-0.590524	-0.451796	-1.1259	-0.514305	1.29061	0.487936	-1.26551	0.681585	-0.550656	1.37229	1.00455	-0.0416464	1.3688	2.49382	0.171044	0.287435	0.458379	0.930093	-0.213253	0.795961	-2.19181	1.41021	-0.514445	-0.76963	-0.819848
AUUUAU	UA-rich_d1	2.38377	2.28935	2.4782	1.84727	1.6314	2.06314	1.52837	1.39038	1.66636	3.5012	3.22137	3.78104	1.04987	0.923535	1.1762	-0.243501	-1.07041	-1.63009	-1.40912	-1.80905	-1.49778	-1.73823	-1.29916	-1.83209	-1.08912	0.923965	-1.33996	-0.71302	-3.35516	-0.447354	0.883699	0.132171	-1.67346	-1.97162	-2.25004	2.3374	1.37144	-0.365068	-1.22245	0.945274	-1.01928	-1.72726	-0.536744	0.292629	-0.691603	-1.16051	-2.42459	0.648928
AUUUCU	U-rich_d2	0.702654	0.628149	0.777159	0.901387	0.685537	1.11724	1.81557	1.63392	1.99722	3.25486	2.89021	3.61951	1.28104	1.16251	1.39958	-1.2311	-0.989101	-0.789971	-1.10601	-2.19023	-0.45533	-0.740355	-1.63854	-1.33517	-0.144184	-1.36665	-1.05249	-0.491379	-0.91463	0.641858	1.19979	-1.05881	-0.44169	-0.169335	0.498063	0.0287249	1.02711	-0.745923	2.74069	-0.785368	0.543473	-1.07724	0.496304	-0.12411	-0.123443	-1.61205	0.99848	0.206759
AUUUUA	U-rich_d2	1.46886	1.38033	1.55739	2.23261	2.04315	2.42207	1.46165	1.29821	1.6251	4.73372	4.48386	4.98359	1.18325	1.04577	1.32072	0.435315	-2.70473	-3.20185	-1.17399	-1.86403	-0.336743	-0.723698	-2.92568	-1.59504	0.328515	0.271352	0.166411	-0.911542	-0.481694	-0.0129231	1.17025	0.721807	-0.508471	0.320212	2.62524	0.125759	-0.117273	-1.2732	-1.20025	0.436845	-1.39575	-1.07828	-0.942259	-0.531722	-0.473383	-0.649226	0.496474	-0.0129929
AUUUUC	U-rich_d2	0.434108	0.379173	0.489042	0.996655	0.806616	1.18669	1.57352	1.43046	1.71658	4.11682	3.85883	4.37481	1.4958	1.35686	1.63473	-0.632141	0.0403471	-0.44411	-1.76318	-0.281052	0.403575	-0.950254	-0.0605568	-0.454732	1.60334	1.28188	0.813129	1.33241	0.440595	2.05503	0.734267	2.83842	0.929146	0.14368	0.555752	1.4246	-0.473589	1.08881	0.569723	0.493217	-0.117864	0.670615	1.46496	0	1.23177	0.073728	0.623367	2.02732
AUUUUU	U-rich_d1	0.980044	0.928722	1.03137	1.65695	1.4918	1.82211	2.56535	2.43336	2.69733	4.45284	4.24206	4.66361	1.95171	1.8551	2.04833	0.401376	-1.08754	-1.00867	-0.0204812	0.743844	0.121213	0.962213	-0.955144	0.734989	-0.343141	0.881557	-1.21617	-0.612733	2.33992	4.34094	0.442077	2.67897	2.74586	2.72914	-0.540393	1.98439	-0.568677	0.249133	-0.710619	1.60238	0.83554	2.8165	0.673016	1.22643	2.49141	-1.56381	2.3458	-0.547519
CAAAAA	A-rich_d1	0.221699	0.177834	0.265563	1.99381	1.77492	2.21271	0.285228	-0.076491	0.646947	2.10546	1.5825	2.62842	0.426307	0.313846	0.538769	-0.802822	1.42765	2.43	3.74365	4.61584	5.94101	5.27412	9.00993	5.08369	5.55645	3.27027	7.94292	4.31973	4.07591	4.24853	2.94518	1.2056	5.476	5.37607	4.54279	8.22674	7.68968	4.46147	8.76121	13.0015	9.10869	7.39578	8.10276	5.15594	6.9804	3.95379	9.23402	5.85853
CAAGAA	A-rich_d2	0.251251	0.204321	0.298181	1.59206	1.33417	1.84995	-0.340395	-0.63023	-0.0505613	1.72823	1.42126	2.03521	0.483614	0.337303	0.629925	3.49671	5.44822	7.2863	3.72677	6.62148	11.3617	7.98549	9.99059	13.7789	11.741	12.7482	7.82213	14.054	6.78569	8.24282	7.59723	3.18782	9.75736	14.4277	9.4455	8.28705	10.3494	10.9142	10.2918	8.81695	7.4063	15.0243	15.32	4.41241	12.8532	10.4316	13.2607	10.8757
CAUAUA	UA-rich_d1	2.2718	2.18463	2.35898	1.37913	1.08193	1.67633	0.0451309	-0.199279	0.289541	2.18661	1.77955	2.59366	0.130894	-0.0458277	0.307615	-0.523518	-1.95332	-0.331951	-1.18339	-1.19699	-0.854967	0	-1.22827	-0.903342	-1.8022	-1.43689	-1.30216	-1.74062	0.0456752	-2.34095	-4.21775	-1.16583	-2.25473	-1.14911	0	-0.354151	-3.85259	0.212453	-1.34008	3.47229	-0.99841	0.350716	-1.07979	-1.09576	0	-3.15023	-2.57129	0.482313
CAUUUU	U-rich_d2	0.625467	0.563627	0.687307	1.15659	0.974236	1.33894	1.96576	1.7889	2.14262	4.66219	4.34166	4.98272	1.40864	1.2569	1.56037	-1.04272	0.0784125	-1.01244	-1.28912	0.580917	-0.131901	-0.443643	0.243337	0.199052	0.703056	0.979622	1.99161	1.3352	2.12082	0.523476	2.45481	0.229364	2.08977	0.532334	1.58857	-0.835876	0.590796	-2.02101	1.88345	1.3861	0.882762	0.164273	0.274148	0.773125	0.677066	0.771126	1.90365	2.69964
CCUUUU	U-rich_d2	0.471346	0.410325	0.532367	0.27023	0.096152	0.444308	2.06534	1.84216	2.28851	3.34541	3.02113	3.6697	1.67745	1.54858	1.80631	-0.913788	-0.681908	-1.14146	-0.311666	0.348532	0.554951	-0.828514	-1.57082	-0.92291	-0.852389	-0.315642	0.918219	1.39886	1.47153	1.48757	0.281208	0.77052	1.5326	0.197979	-0.139246	1.22803	0.765671	-0.238146	0.460121	0.337742	0.126231	-0.0838474	0.159755	0.915284	1.21859	1.31476	0.501122	0.725206
CUAUAU	UA-rich_d1	2.8349	2.70018	2.96961	1.41605	0.836549	1.99556	0.762824	0.49817	1.02748	3.24398	2.77998	3.70798	0.561583	0.400508	0.722658	-0.612604	-0.780616	-0.138323	-0.93605	0.380639	0.137916	-0.343652	-0.7881	-2.62498	-0.559603	-0.859942	0	-0.00802567	-0.325794	-1.15765	-1.78329	-0.373597	-1.07542	0	-0.943646	-0.338623	-0.55116	-0.512421	-0.985024	-2.65958	-1.45069	-2.36751	-3.7449	-0.380911	-0.93601	0	-0.0686803	-0.294363
CUUUUA	U-rich_d2	0.924921	0.837149	1.01269	1.35518	1.12748	1.58288	1.04712	0.877832	1.21641	4.66146	4.30988	5.01305	1.20657	1.08506	1.32808	-0.0203939	-1.03019	-1.04865	-0.199805	-0.326767	-0.000108667	-0.559315	-1.05643	-1.77436	0.0407996	1.64586	-0.206862	-0.482381	0.883059	0.110343	0.21128	0.221739	-0.455177	-0.00957216	1.03252	0.0844839	0.639567	0.10572	-0.0861431	-0.584398	0.175052	-1.17433	-0.0802727	0.752968	-0.869067	0.4161	0.125367	-0.257121
CUUUUC	U-rich_d2	0.243965	0.185463	0.302468	-0.101865	-0.405725	0.201994	1.39048	1.19319	1.58777	3.83657	3.55712	4.11601	1.52678	1.37339	1.68018	0.423849	-0.0201598	-0.0668233	0.396914	-0.471122	-0.179383	-0.489467	0.264278	0	0.116724	-0.340261	-0.0192379	0.642467	0	0.216126	0.337114	1.20864	0.311913	1.33564	1.22709	0.447009	-0.493807	0.636003	-0.318981	0.709517	-0.547228	-0.103341	0	0.182642	1.37413	0.152791	2.18145	0.516357
CUUUUU	U-rich_d1	0.610308	0.561805	0.658812	0.629274	0.433551	0.824998	2.48296	2.32945	2.63647	3.38876	3.16066	3.61686	2.08037	1.97354	2.1872	-0.95258	-0.896437	-0.411368	-0.96171	-2.03284	-1.1053	-0.244754	-0.455712	-0.333575	-2.08575	-0.413389	0.230403	0.349274	3.68102	0.983899	1.40876	1.91455	2.23528	1.56946	1.73148	1.21241	1.14106	0.372045	0.450129	-1.18052	3.40753	0.704487	-0.0315721	0.656582	-0.0448359	-0.479413	0.0670693	0.501287
GAAAAA	A-rich_d1	0.249408	0.214314	0.284502	1.6173	1.41882	1.81578	-0.37337	-0.799731	0.0529917	2.37514	1.72118	3.02911	0.486139	0.360889	0.61139	3.32223	3.35149	5.43291	6.2443	9.90935	6.03265	7.39165	15.2164	9.65427	12.1294	9.41404	12.2489	15.5916	12.4951	4.38636	11.0131	7.12967	11.4832	14.4388	17.3429	8.8487	12.1602	9.21797	7.23849	13.1843	23.5252	9.34034	11.4877	15.1168	20.9497	21.8691	14.5341	13.3218
GAAAAG	A-rich_d2	0.232153	0.187324	0.276982	1.08854	0.86084	1.31623	-0.976472	-1.47475	-0.478195	1.38698	0.575557	2.19841	0.268233	0.0998357	0.43663	1.00535	2.23182	6.04968	4.59059	6.81169	11.4722	11.6295	6.0738	9.52775	14.2134	11.4172	14.8919	10.8849	18.968	6.77638	3.60096	6.65254	11.5387	14.4928	8.60907	14.1376	3.8164	10.3876	15.601	10.4854	13.7252	18.8139	9.48227	7.0898	11.2065	12.9643	1.72506	10.7223
GAAAGA	A-rich_d2	0.194093	0.142397	0.245789	0.68272	0.315787	1.04965	-1.02294	-1.48383	-0.562048	2.71661	2.05509	3.37813	0.428971	0.21097	0.646972	2.79963	5.33365	5.17255	6.68478	8.3887	9.22546	11.346	11.563	13.699	10.0937	4.82831	12.6055	9.03006	10.8381	14.5099	6.66114	5.81226	6.88203	10.5436	6.68686	9.12002	7.75859	9.12203	12.7421	12.1604	7.83808	16.0638	12.3534	10.8299	12.2254	7.26456	6.50993	11.8741
GAAGAA	A-rich_d2	0.308085	0.264692	0.351478	1.11141	0.793368	1.42946	-0.480976	-0.935657	-0.0262961	2.08554	1.75013	2.42095	0.401691	0.253083	0.550298	6.82306	7.96522	12.5916	16.1343	18.5324	23.9242	21.129	22.7585	19.9337	22.8474	19.0686	19.5342	18.1057	20.215	15.0425	11.7356	16.006	18.8954	14.4237	17.7618	22.1672	13.0663	17.4758	29.5011	25.2167	19.3167	26.965	23.0515	25.2401	25.6057	28.0676	33.2999	39.3395
GAAGAG	NA	0.261644	0.186841	0.336448	0.0780207	-0.499292	0.655334	-0.740016	-1.11757	-0.362463	1.73855	1.09493	2.38217	0.0964772	-0.155432	0.348387	2.65316	5.68606	4.30747	7.63938	6.61352	4.50172	10.8536	7.63212	14.8485	9.60431	7.68141	10.7576	6.66677	6.59696	9.40805	5.86582	3.8166	7.18189	4.49132	7.67397	11.4574	6.98625	4.38461	3.13129	12.9956	11.1331	7.52282	5.90387	5.07267	6.89516	10.2942	8.1635	7.12131
GAAGAU	NA	0.33885	0.276802	0.400898	0.918073	0.651387	1.18476	-0.0668442	-0.382301	0.248613	1.97861	1.35708	2.60013	0.0601476	-0.158794	0.279089	2.731	5.43467	6.22252	5.97272	10.1578	5.96853	9.15464	13.6575	17.8648	7.93018	21.3638	9.56272	5.48212	14.9333	10.292	14.6664	10.6095	7.36932	9.38112	8.45485	7.98323	10.9262	9.28566	7.23259	8.79626	13.9806	12.3469	12.8278	2.1271	9.49029	13.5917	10.2773	7.37408
GAUGAA	NA	0.209238	0.144546	0.27393	0.774656	0.532697	1.01661	-0.386021	-0.675601	-0.0964412	2.23329	1.74466	2.72191	0.192257	0.0518407	0.332673	1.13749	6.51691	6.341	5.20691	6.75006	14.3167	8.91222	11.9973	14.0709	7.59144	8.74904	14.115	6.99234	9.71202	9.21628	11.4832	9.62047	13.5024	7.60609	5.92689	6.88008	13.6054	15.3428	6.78243	13.1484	10.1208	3.46068	13.0977	4.61411	14.7934	15.1578	13.808	7.54842
GGAAAA	A-rich_d2	0.267855	0.219198	0.316512	1.14908	0.878457	1.41971	-0.339447	-0.759636	0.0807421	2.9431	2.35657	3.52964	0.313946	0.110377	0.517516	1.98997	5.12184	4.2498	8.97297	6.56052	6.7334	7.34634	6.27213	11.4064	11.6129	9.98893	11.6785	10.0012	7.23371	5.33802	12.6499	7.21718	19.0106	12.8176	3.11102	7.3756	10.0318	6.00769	10.548	13.0149	7.23876	10.3648	9.35789	20.1637	16.5488	5.92726	7.21407	13.0136
GGAAGA	NA	0.438586	0.37205	0.505122	0.399538	0.053503	0.745573	-0.691599	-1.09012	-0.293077	2.1458	1.64097	2.65063	0.369205	0.152728	0.585683	0.164215	3.87721	6.20169	9.24088	2.25092	9.72671	17.676	9.41896	8.22721	6.13399	13.3007	8.19986	9.04466	9.54194	5.89362	2.25674	11.5156	6.60362	5.56049	12.9791	14.6321	4.91395	13.0363	9.26163	7.66214	11.3141	16.3416	4.01824	3.84456	7.5553	13.6763	13.5785	6.70953
GGUGAA	NA	0.251883	0.156892	0.346875	0.40038	-0.0304865	0.831247	-0.552031	-1.0738	-0.0302676	3.65542	3.17383	4.13702	-0.047645	-0.272114	0.176824	2.09364	2.46912	1.38758	5.23625	6.25508	3.30071	7.83189	3.50807	4.67415	14.3163	11.0571	8.04765	5.73455	2.95231	9.20564	8.25585	8.44774	18.1379	4.3286	6.44718	-0.170779	11.9818	2.20482	6.54666	2.66971	1.75069	3.46654	7.11825	4.77351	7.27588	7.76574	4.17888	13.4111
GUAUAU	UA-rich_d1	3.0689	2.96267	3.17513	1.33697	0.947711	1.72624	0.765566	0.544386	0.986746	2.61668	2.18629	3.04707	0.132197	-0.0671207	0.331515	-0.228787	-0.834814	0.0865202	0.64454	-1.08199	-0.631576	0.249805	-0.556394	-1.31695	-0.620429	-4.21006	-1.87256	-0.488066	0.880777	-2.9252	0	-0.726783	-2.4923	1.15619	-0.0386106	-0.50905	-2.96267	-0.619992	-0.516728	-0.81075	-0.324627	0.31592	-0.344365	-0.376409	-2.81971	-0.274109	-0.545576	0.0676359
GUAUGU	UA-rich_d2	2.45611	2.29158	2.62065	0.810275	-0.0270782	1.64763	0.577587	-0.103112	1.25829	1.01061	0.516619	1.50461	0.11707	-0.0784325	0.312572	-0.725518	0.118776	-0.892325	-0.442671	-0.75102	-1.57576	0	-1.91341	-1.92633	-0.735783	-1.18072	-1.50198	-1.15935	-0.526923	-0.274506	-0.376452	-2.39175	0	-0.139103	-0.540726	-2.69577	0.00577111	2.41296	-0.850897	-0.344005	-1.72789	-0.366653	-0.290335	-1.23936	-1.85356	-1.30711	-0.330381	0.00454073
GUUUUU	U-rich_d1	0.624392	0.558496	0.690288	0.663349	0.469575	0.857122	2.34428	2.17135	2.51721	2.50367	2.06053	2.94681	1.90198	1.76556	2.0384	-0.296588	-0.773777	-0.213787	3.19437	-2.50664	0.820311	-1.17638	-0.549547	0.341097	-1.43673	-1.6894	-2.7608	0.448284	0.602031	2.35174	0.856869	0.793874	1.01704	0.816243	3.78723	0.456544	0.083833	0.780587	-0.907963	1.05669	0.427281	-0.555819	1.66814	2.79742	1.03318	1.09585	-0.298444	-0.0521144
UAAAAA	A-rich_d1	0.662458	0.601608	0.723308	2.86485	2.69296	3.03675	0.368572	0.0708941	0.666249	2.15065	1.68869	2.6126	0.186561	0.0900847	0.283037	0.797943	0.299053	1.2087	1.28482	1.52812	3.49576	2.29177	2.05607	1.58542	1.15707	2.23181	1.92611	7.33906	2.73999	-0.307635	0.868741	-0.231614	4.27777	2.06795	1.57325	2.95022	2.58014	4.38025	9.76023	5.34726	5.70357	2.24458	3.36475	-0.366518	2.41095	4.32366	6.32695	2.6591
UAAAUA	UA-rich_d1	2.98892	2.90692	3.07091	2.89207	2.66215	3.12198	0.34023	0.0443773	0.636082	3.37228	2.94677	3.79778	-0.203833	-0.366368	-0.0412978	-0.848194	-2.00513	-2.15859	-1.33881	0.0861784	-1.06829	-1.71696	-0.270127	-3.0689	-0.337431	-3.40851	-1.22375	-2.88576	-1.00898	-0.282487	-6.07559	-5.28754	-1.22406	-0.334435	-1.3407	-2.65541	-2.72457	-1.02648	-1.9743	-1.18842	-0.85973	-2.42708	-0.0391721	-1.29754	-2.33348	-0.307358	-2.90258	-5.12671
UAAUAA	A-rich_d2	1.33723	1.24362	1.43085	3.46927	3.30713	3.63141	0.339683	0.126416	0.552951	2.37098	2.14227	2.59969	-0.125794	-0.2379	-0.0136872	0.00598665	1.20198	-0.538931	0.0541893	1.2465	-0.771907	-1.04963	-0.350783	1.7184	-0.0644073	-2.44525	-0.473952	-1.531	-0.63812	0.780815	0.703804	-2.98637	0.150719	-2.36204	-1.14777	0.400483	-0.802385	-0.417415	-0.548926	0.185466	-3.0344	0.411938	-1.16288	-1.32288	0.438489	-1.41913	-0.724137	-3.36858
UAAUAU	UA-rich_d2	1.94317	1.83985	2.04649	2.67935	2.49421	2.8645	1.10317	0.945256	1.26108	3.01747	2.68444	3.35049	0.191524	0.0784257	0.304622	-0.661394	-1.57026	-0.40609	-1.67197	-1.05479	-1.97139	-1.1206	-0.299286	-0.51068	-1.23028	-1.2507	-1.62162	-1.65192	-1.14714	-1.08718	-1.4433	-0.279809	-1.46771	-0.458313	-1.17695	-1.34913	-0.108032	-0.599302	-3.39003	1.76583	-0.14936	-0.548293	-1.69504	-0.436506	-2.75626	-1.45964	2.66627	-0.958103
UAAUUU	U-rich_d2	1.38813	1.2867	1.48956	2.50066	2.32152	2.67981	1.77051	1.58474	1.95628	4.11814	3.75175	4.48454	0.708735	0.595079	0.822391	-0.468637	0.0603278	-0.688498	0.9616	0.0413241	-1.53917	-0.331948	-0.0575972	0.103365	-1.7705	0.373281	-1.58468	0.591464	-0.506968	-0.469711	-0.971238	-0.438435	-0.187498	-0.53627	-0.393824	-1.58284	-2.02383	0.168184	-0.188011	-0.147554	-3.49541	-1.04139	-0.481898	-2.72047	-0.151754	-1.76924	-2.24296	-2.17012
UACAUA	UA-rich_d1	3.12503	3.03837	3.2117	1.92611	1.54703	2.30518	-0.0989539	-0.384854	0.186946	2.86819	2.46913	3.26726	0.108168	-0.107471	0.323807	0.0123533	-1.92254	-0.0496699	-0.590588	-0.111295	-1.21219	-0.949209	-1.03711	0.014365	-1.26169	-0.15325	-0.777961	-0.90409	-1.93872	-0.5693	-0.287762	-1.07801	-1.21788	-0.610327	1.49901	-2.00821	-0.104332	0.191263	1.25697	-0.509472	-0.212235	-0.105128	-1.55321	-1.94635	-0.842102	0.578565	-1.73148	-0.510462
UACGUA	UA-rich_d2	3.16376	3.02867	3.29885	1.12072	0.689764	1.55168	-0.0866867	-0.402762	0.229388	1.67523	1.00345	2.34701	-0.100292	-0.311786	0.111202	0	-0.426811	-1.32828	-1.93362	-0.701505	0	-2.14784	-0.42963	-1.44125	-0.966398	0	-1.13919	-1.86633	-0.814866	-1.34145	-0.913298	-4.29571	-0.249768	-0.143965	-1.36527	-1.50646	-2.13971	-1.44709	-0.902946	-0.694973	0	0	-0.433599	-3.78463	0	0	0	-1.92575
UACUUU	U-rich_d2	1.32711	1.21601	1.43821	1.36432	1.08089	1.64776	1.82696	1.64169	2.01222	3.96829	3.64168	4.29491	0.963525	0.817495	1.10955	0.697069	0.804241	-0.590287	0.413084	-0.42686	0	-0.389349	-0.185679	0.602633	-1.69981	-0.129093	-0.702799	-2.56253	0.0752849	0.634965	1.5508	1.16917	0.142372	-0.273568	0.502269	-0.758468	-0.989395	-0.486343	-0.170127	-0.32341	0.286352	1.2088	0.000346002	-0.884886	-0.0672027	-0.594253	0.161175	-0.589405
UAGAUA	UA-rich_d1	2.78085	2.64317	2.91852	1.73293	1.36805	2.09782	-0.0944235	-0.377467	0.18862	2.21246	1.67388	2.75105	-0.159322	-0.357623	0.0389788	-0.551824	-1.09218	-2.25324	-0.314776	-0.124702	-1.38058	-1.05923	-0.546573	-1.22757	-1.04919	-0.563322	-1.6823	0.0490444	-3.25223	-1.04246	-0.744719	-0.948772	-1.29567	-1.08134	-1.31337	-1.83321	0.383397	-1.05664	-0.25897	-0.844998	-3.56395	-1.90305	0.0720666	-2.30973	-1.68472	-0.934309	-2.15034	-0.201516
UAUAAA	UA-rich_d1	2.45405	2.36627	2.54184	2.91091	2.73142	3.09041	0.0249547	-0.157607	0.207516	2.62679	2.22244	3.03114	0.126378	0.00487294	0.247884	-0.167789	-0.0534395	-0.143274	-0.594261	-1.32443	0.187821	-0.678215	-1.47225	0.358602	-0.488251	0.00534992	-1.09616	-0.224955	-3.52276	-1.39285	-0.127591	-0.915776	-1.81481	0.640902	-2.14974	-1.9131	-0.244816	0.275789	-0.130165	0.0459669	-0.444599	-1.13458	-0.620719	0.922944	-2.53303	-3.69817	0.192464	-2.63463
UAUAAU	UA-rich_d2	2.71574	2.60428	2.82721	3.01464	2.83803	3.19124	0.930471	0.73924	1.1217	2.97337	2.47681	3.46993	0.22159	0.0980767	0.345104	-0.0583401	-0.00187434	-0.847305	-0.764049	-1.21964	-1.3423	-1.31248	-1.64977	-1.35143	-0.796378	0.0118157	0	-2.98331	-0.560973	-0.810795	-1.53547	-1.11594	0.443722	-0.813796	-0.627411	-2.33751	-0.563528	-0.653498	-0.448024	-0.727932	-2.49309	-4.5594	-0.819713	-1.51557	-2.44355	-4.03541	-1.37214	-1.63036
UAUACA	UA-rich_d1	2.4418	2.34888	2.53471	1.58327	1.26434	1.9022	-0.203626	-0.465393	0.0581414	2.06005	1.69203	2.42807	0.183707	-0.00514919	0.372563	-0.679079	-0.425926	-0.86478	0	-0.744504	-1.62898	-1.32867	-0.654382	0.222228	-1.38104	-2.38109	-0.832076	-0.879187	-0.921729	-0.293442	-1.72227	-3.1823	-0.830087	-1.27313	0.346622	0.0101504	-0.822905	-0.395027	-2.20741	-1.12451	-1.71861	0.446823	2.00238	0.0179922	0.219779	-1.32813	-1.22717	-0.788609
UAUAGA	UA-rich_d1	2.74261	2.62053	2.86468	1.85712	1.4322	2.28204	0.00440333	-0.340319	0.349126	1.59287	1.2445	1.94124	-0.207382	-0.396973	-0.0177917	-0.058002	-0.157951	-0.127115	0.0482786	-0.716119	-0.761587	-0.280329	1.55134	-1.10855	1.22179	-0.236696	0.151529	-2.29728	-1.09882	0.0389241	-0.376712	0	0	1.15327	-1.08011	-0.569546	-0.500432	-0.402524	0.839951	-1.22056	0.088431	-1.66861	-1.70585	0.554412	-0.94283	0.502167	0.0505224	-0.859538
UAUAUA	UA-rich_d0	3.32516	3.26626	3.38405	1.81794	1.42644	2.20944	-1.05779	-1.52664	-0.588948	1.88058	1.40478	2.35639	-0.0802448	-0.282847	0.122358	-0.159696	-0.693549	-0.975442	-0.245795	-0.238504	-0.744637	0.695665	-0.265754	-1.03029	-0.892563	-0.0966033	-0.406086	-2.60834	-1.64424	-1.98385	-0.00693248	0	-1.08148	-1.73187	2.53748	0.589875	-1.79595	-0.658326	-2.3555	-0.987542	-2.99692	3.58405	-0.959616	-0.483538	-0.64699	-1.78674	-0.214418	-1.70618
UAUAUG	UA-rich_d1	2.10294	1.99519	2.21069	0.906428	0.574861	1.23799	0.390861	0.0811595	0.700563	3.26677	2.83066	3.70287	0.248997	0.108771	0.389223	-0.154074	-0.455009	-0.271005	-1.06673	-0.421664	-1.26317	-1.11425	-0.328732	0	-2.2063	-0.597713	-2.21836	-0.738105	0.433805	-0.714108	-1.5918	-0.938624	-0.951995	-2.05723	0.09123	-0.281763	0	0.746828	-1.28581	0	-1.98765	-1.33031	2.19621	-1.05126	1.60903	-1.38955	-0.253553	-0.867966
UAUAUU	UA-rich_d1	2.4003	2.30936	2.49125	1.86749	1.62762	2.10737	1.57356	1.39888	1.74823	3.40367	3.12892	3.67842	0.839294	0.733669	0.944919	-0.562924	-0.630865	-1.22975	-0.93836	-0.856322	-1.08654	-1.29681	-0.188986	0.0621986	-2.71189	0.170049	-4.14401	0	-0.197858	-0.348519	-1.31802	-1.74425	0	-0.558756	-0.982712	-0.0336396	-0.893847	-2.64224	-2.3205	-0.763141	-0.530114	-0.835127	-3.31923	-3.35755	-0.848293	-2.46173	1.02873	-1.95863
UAUGUA	UA-rich_d1	3.35081	3.25646	3.44516	2.33086	1.6394	3.02233	-0.0110421	-0.524082	0.501998	2.14148	1.66272	2.62023	0.14339	-0.0760509	0.362831	-1.28826	-0.698207	0	-1.24601	-2.08292	-0.571943	-2.70557	-0.45776	-1.09078	0.310606	0.326688	-2.3921	-3.56058	-2.58592	-0.441578	0.148419	0	-2.4297	-0.0588648	0	-2.28682	-0.61246	-1.4286	-1.26046	0.924483	-0.998567	-6.34238	0.189287	-2.25429	1.00302	-0.744693	-2.27541	-1.04955
UAUUAU	U-rich_d2	1.56153	1.466	1.65705	1.49748	1.33803	1.65694	1.37214	1.25944	1.48484	2.66637	2.46292	2.86983	0.844135	0.758604	0.929666	-0.628204	-0.215037	-0.866239	-0.589513	-0.57927	-0.420234	-2.43104	-1.09251	-2.37544	-0.610793	-2.05986	-0.629226	-0.848889	-2.01407	-0.196962	-0.649833	-0.564027	-1.27661	0.0790644	0.13845	0.535582	-1.8275	-1.86221	-1.46913	0.775594	-1.4482	-0.39504	-2.84521	-1.68268	-3.00314	-2.2611	-0.956938	-2.73527
UAUUUA	UA-rich_d1	2.58177	2.50065	2.66288	2.23686	1.99505	2.47867	1.21806	1.0588	1.37731	4.22197	4.01028	4.43366	0.875719	0.771014	0.980424	-0.0484105	-1.01457	-0.915965	-2.64985	-1.20414	-0.757722	-0.442028	-1.79002	-1.61524	-0.312461	-2.74554	-1.21621	-2.94844	-0.953625	-2.78376	-2.78927	-3.09682	-2.19207	-1.38679	-1.17403	-0.557298	-0.767784	-2.60664	-0.532325	-1.20317	-1.6617	-1.54118	1.46639	-2.5063	-2.55695	-2.42444	0.812905	-0.9391
UAUUUU	U-rich_d1	1.31117	1.24791	1.37443	1.58783	1.39286	1.78279	2.32767	2.2005	2.45484	4.46424	4.25674	4.67175	1.74885	1.65809	1.83962	-1.20756	-1.96127	-1.1694	-0.623628	-0.0630418	-1.46465	-3.5226	-1.11273	0.122474	-2.11272	-1.78461	-1.70971	1.02571	1.89436	-0.135341	0.476086	0.903425	0.712946	0.296746	0.559448	-0.772974	0.394674	0.0801263	-1.60938	-1.62196	-1.16154	0.140509	-0.129612	-0.303186	-1.02599	-1.36266	-0.31308	1.13563
UCAUUU	U-rich_d2	0.535542	0.470552	0.600531	0.695433	0.522353	0.868513	1.70233	1.51672	1.88794	5.79648	5.43835	6.1546	1.39974	1.22851	1.57097	-0.221456	0.179898	-0.226708	-0.447173	-0.346879	-1.58113	-0.0425518	0.219988	0.235747	-0.84214	1.56537	0.272262	0.185952	-0.0980926	2.30051	-0.695658	0.590399	1.71939	1.93665	0.130467	1.45633	-0.89648	0.303218	0.596479	0.0990867	1.19724	-0.246928	-0.604073	2.39106	0.159266	-0.669133	1.075	-0.017121
UCUAUA	UA-rich_d1	2.42113	2.31046	2.5318	1.67165	1.30237	2.04092	0.585085	0.365404	0.804765	3.19396	2.82449	3.56343	0.585471	0.427904	0.743037	-0.30829	0	-2.48886	-0.0240728	-3.00902	-0.343154	-0.791444	-1.14043	-1.28566	-0.557943	-0.856679	-0.557166	-0.829495	-0.0897882	0	0	-1.33679	-1.04052	-0.451511	-1.01973	0	0	-0.122221	0	-3.25682	0	-0.505637	-1.03767	-1.87708	0.00510994	0	-0.733281	-1.475
UCUUUC	U-rich_d2	0.300518	0.241716	0.359321	-0.292046	-0.678033	0.0939413	1.49521	1.29825	1.69217	4.06164	3.75247	4.37081	1.57086	1.43539	1.70634	-0.251832	-0.182584	-0.597997	-0.529047	0.0313681	-0.326379	-0.208365	-0.273283	-1.04352	0	-0.743025	-1.35433	0.169266	0.326026	0	-0.549565	-0.128433	0.927025	-0.145946	0.149499	0.609448	0.94032	-0.263632	0.0641442	0.0728385	-0.635447	0.181067	0.109748	-0.297024	0.144481	-0.366474	0.59229	0.0916787
UCUUUU	U-rich_d1	0.670538	0.611757	0.729319	0.369852	0.145703	0.594	2.37856	2.22757	2.52955	3.88178	3.63803	4.12553	1.99495	1.88393	2.10598	-0.503103	-0.142374	-0.165559	-0.840959	-1.57631	0.275188	0.0997653	-1.07844	-1.09233	-1.31761	-0.696094	0	-1.02819	0.129038	0.605839	3.15093	-0.231564	0.622769	2.87698	0.0774328	-0.110242	-0.730452	1.64218	-0.116085	0	-1.35491	1.54529	-0.167939	0.59717	0.0543157	0.43777	-0.281922	0.785886
UGAAAA	A-rich_d2	0.165211	0.122341	0.208081	1.74383	1.55458	1.93308	-0.28762	-0.532899	-0.0423414	3.25546	2.72822	3.78271	0.510159	0.383902	0.636417	2.3107	5.73446	2.99977	6.82275	12.2315	6.45967	12.2997	10.4138	8.58576	10.6509	13.1983	12.9306	18.7863	9.43096	6.60693	4.22187	8.39578	10.3571	12.5747	18.404	6.76589	10.7642	12.8844	13.8822	15.6829	15.566	14.4487	12.8464	13.7118	8.89869	13.2531	15.1519	13.839
UGAAGA	NA	0.224444	0.151027	0.297862	1.09993	0.809573	1.39028	-0.191768	-0.554914	0.171379	2.53731	2.02584	3.04879	0.384007	0.251608	0.516405	8.71486	11.6475	8.48635	12.9169	18.2338	20.1512	18.6586	29.0188	15.3432	21.6896	11.4243	10.9	19.581	17.487	13.3634	11.8226	10.2198	15.7305	19.5842	23.4738	11.0677	12.1177	12.5708	14.5848	22.0134	20.6046	7.9045	20.7951	15.6101	15.0419	22.7825	22.8351	14.7556
UGAUGA	NA	0.0914518	0.00432575	0.178578	0.100871	-0.184314	0.386056	0.290181	0.0739553	0.506408	2.00652	1.58383	2.42921	0.392824	0.261535	0.524113	5.54884	3.82743	7.14028	7.35108	16.4901	12.4807	9.65697	13.0061	6.85002	10.4507	9.19551	6.64126	11.1638	11.4643	4.47476	7.55652	12.0245	6.30516	12.3401	17.1582	7.50274	10.6883	10.7563	8.31946	19.5093	14.5276	10.6565	9.73252	18.3002	9.43536	16.7037	11.1575	23.899
UGGAAA	NA	0.301456	0.238421	0.364491	1.26103	1.02332	1.49874	-0.0258268	-0.357745	0.306091	3.90172	3.32193	4.48151	0.472722	0.2924	0.653043	2.93863	4	4.51375	9.11163	6.27866	6.3963	6.01158	9.10821	10.7479	12.6073	10.108	7.41159	6.19348	7.99667	16.1648	7.65989	15.9999	10.4552	8.10553	8.59441	12.029	8.06102	9.03058	9.06023	11.0651	13.9782	9.13089	8.38056	15.816	6.23602	9.39032	11.133	9.57869
UGGUGA	NA	0.330904	0.210817	0.450991	-0.240487	-0.630448	0.149475	-0.0336402	-0.509453	0.442173	3.254	2.58901	3.91899	0.169711	-0.223711	0.563134	1.61055	1.29659	1.73356	4.6491	2.4996	6.80274	6.37865	12.4377	9.65633	9.0023	11.13	10.6245	6.04619	9.39822	7.94546	4.53983	20.0913	7.60188	8.61636	1.61119	15.4934	2.59127	5.03191	3.5117	7.65453	10.738	4.36241	8.13987	4.55553	8.74276	3.53295	15.924	9.84958
UGUAUA	UA-rich_d1	2.9953	2.90843	3.08218	1.67585	1.31486	2.03683	0.411977	0.147571	0.676383	2.36323	1.91189	2.81458	0.250858	0.0775471	0.424168	-0.87927	-0.0177854	-0.324421	-0.658963	-2.85154	-0.0526578	-0.845542	-1.7078	-1.39066	-1.86986	-0.244181	-0.940886	-1.89838	-0.736136	0	-1.11329	-0.449292	0.980565	-0.612753	-0.816927	-2.85728	-1.88228	-0.815	0	-1.05985	0	-0.457252	0.550957	-5.04161	-0.688525	-1.3169	-3.01672	-1.78221
UGUUUU	U-rich_d1	0.504123	0.44162	0.566626	0.559007	0.393647	0.724367	2.07138	1.89232	2.25043	3.14592	2.82942	3.46242	1.98119	1.83489	2.12749	0.831856	0.579362	-0.0285476	0.410688	0.30304	-0.226065	-1.1886	0.35263	0.291838	0.215299	0.0236069	0.487978	0.810557	2.2616	0.564017	2.06794	1.65766	-0.11794	3.1961	0.648702	0.181065	1.06897	-0.317706	0.21153	0.772344	3.62648	1.18715	-0.902346	0.898581	-0.0336501	1.82697	1.66824	1.1513
UUAAUU	U-rich_d2	1.21751	1.11705	1.31797	2.45054	2.28005	2.62103	1.30682	1.1236	1.49005	4.73592	4.31053	5.1613	0.65409	0.545624	0.762555	-0.363527	-0.207152	-0.643461	-2.14336	-1.06243	-1.25261	-0.0778544	-2.66025	-0.954591	-1.03605	-2.15947	-1.85788	-1.34886	-0.571904	0.144119	-0.822801	0.104316	-0.443019	-1.58478	-0.394631	-0.218154	-1.7465	-1.49676	0.267577	-1.53522	-0.612386	-0.168106	-1.60421	-1.01833	-0.0851903	-0.757842	-0.703985	-1.89002
UUACUU	U-rich_d2	0.946944	0.846074	1.04782	0.508098	0.294367	0.721828	1.43126	1.24959	1.61293	4.54026	4.18539	4.89512	0.983508	0.820264	1.14675	0.714752	-1.54432	0	-1.59905	-2.15723	1.0227	-1.70979	-1.94052	-0.966844	-3.08941	-1.02896	1.31238	0.672514	0.0441364	-1.13755	-0.443208	-0.756316	-0.274741	-2.8207	-1.36058	-0.152221	-0.025325	0.878865	-0.392853	-0.33998	-1.92983	-0.664323	-0.0485534	-0.786276	1.73703	0.141605	-0.442969	-1.63263
UUAUAU	UA-rich_d1	3.09888	3.00533	3.19244	1.50759	1.20748	1.80769	1.31966	1.15828	1.48104	4.53181	4.25124	4.81239	0.953001	0.830899	1.0751	-0.643845	-0.810532	-0.657322	-0.818686	-1.62722	-1.37927	-0.560581	-1.53949	-1.62461	0.40901	-2.57414	0.232479	-1.73657	-1.78332	-0.613905	-1.11899	-0.663172	-1.36049	-0.578889	0.975424	-2.18886	-0.503869	-2.85788	-2.29345	0.335095	-0.917657	-0.249354	-3.56641	-1.05494	-0.415589	0.368091	-1.63931	-1.59075
UUAUGU	UA-rich_d2	2.61005	2.46271	2.7574	1.35499	0.694937	2.01505	1.36051	1.12001	1.601	2.90162	2.42277	3.38047	0.755753	0.582598	0.928907	-0.495986	-0.279026	-0.0315401	2.84425	-0.409783	-0.778084	-1.25847	-1.37094	-1.18046	-1.82517	-0.543343	-1.52702	-2.95954	-1.04949	-2.07167	-3.67587	-0.552808	-0.360436	-1.86948	-0.564346	-1.13945	-3.49501	-1.51542	-1.22838	-1.20481	-2.18512	-1.76098	-2.22065	-0.359526	-2.09708	-2.86094	-2.37112	-1.47275
UUAUUA	U-rich_d2	0.945145	0.867993	1.0223	1.25698	1.04836	1.4656	1.20728	1.06891	1.34566	3.02167	2.82126	3.22208	0.79244	0.678997	0.905883	-0.167842	-0.579781	-1.4531	-0.877902	-0.503541	-2.45013	-1.73911	-1.92211	-1.23989	-2.48433	-0.709417	-1.36484	-2.39838	-2.07213	-0.777468	-0.777071	-0.776062	0.13855	0.151833	-0.502965	-0.827871	0.155215	-0.954144	-1.11934	2.72678	-0.952963	-0.802411	-0.138869	-2.92145	-1.39305	-1.97493	-1.03073	-0.692415
UUAUUU	U-rich_d1	1.42139	1.35367	1.48911	1.15286	1.00094	1.30478	2.11089	1.98325	2.23853	4.94818	4.72736	5.169	1.5449	1.44955	1.64024	-1.08823	-0.300871	-1.27058	-1.25788	-2.47718	-2.62079	-0.54026	-3.15009	-2.59068	-2.6966	-3.09507	-0.789177	-0.109497	-1.34636	0.614068	-1.97621	-1.02354	-1.67482	4.15061	0.176089	-0.761794	-0.282312	0.521592	-0.723845	-1.5259	-0.0731867	1.22448	-1.56803	-0.416896	-0.678665	1.89734	-0.401787	-0.0317831
UUCAUU	U-rich_d2	0.461732	0.401558	0.521906	0.390435	0.219809	0.561061	1.4666	1.30064	1.63255	5.49117	5.0978	5.88454	1.44821	1.30567	1.59076	-0.331745	-0.694103	-0.214372	-0.179727	0.24498	0.350505	1.01795	1.74398	-1.35381	0.301181	0.720707	0.146037	-0.0150574	2.02853	-0.910734	0.0781731	1.87261	0.73522	0.393587	-0.870137	0.299053	-1.20334	0.143714	0.387231	0.836064	0.272162	1.30962	1.59799	0.0162885	1.87599	0.714176	0.32159	0.733716
UUCCUU	U-rich_d2	0.188909	0.12463	0.253188	-0.521118	-0.845719	-0.196516	1.33563	1.13312	1.53815	4.20114	3.85779	4.54449	1.69075	1.55246	1.82904	-1.49657	0.352671	-1.11245	-0.390374	0.166178	-1.16677	-0.788229	-0.675503	-0.512801	-0.413996	-0.681481	-0.567883	-0.156074	0.818897	1.59638	0.136495	0.294255	-0.0835573	0.236424	1.08539	0.483605	0.806712	1.05977	1.04522	-1.23478	-0.0621902	0.627181	1.06608	-0.278547	0.698133	1.1377	1.25469	0.521462
UUCUAU	UA-rich_d2	1.59264	1.48295	1.70234	0.799042	0.496879	1.1012	1.26557	1.09573	1.43542	4.19431	3.86964	4.51898	1.31763	1.18783	1.44742	-1.46199	-1.84068	-0.028953	-1.80463	-0.484175	-0.024316	-1.20255	-1.06279	-2.26502	-2.33768	-0.625375	-1.19307	-2.44771	-0.16167	-0.260128	-1.42816	0.596543	-1.01557	-1.4715	0.0321948	-0.734826	0.314366	0.870429	-1.54216	-0.412358	0.0049881	0.202143	-1.47863	-1.10932	0.903193	-0.861994	-1.66761	-1.65425
UUCUUC	U-rich_d2	0.268326	0.21992	0.316732	-0.389763	-0.580265	-0.199261	1.38271	1.20941	1.55601	3.22429	3.01178	3.43681	1.77877	1.62382	1.93372	-0.0512801	-0.419519	-0.489176	-0.217927	-1.00171	-2.05833	-0.165058	-1.1404	-0.989078	0.114772	-0.620098	-0.219947	-0.623383	-0.331878	-0.522219	0.589344	-0.719571	2.15347	-0.0220896	0.761009	0.746463	0.00719793	0.237367	-0.566093	-0.101389	-1.34158	-0.36948	0.498967	-0.0595199	0.884044	0.581662	-0.446178	2.52204
UUCUUU	U-rich_d1	0.616581	0.565695	0.667467	0.325284	0.0553857	0.595183	2.21677	2.06282	2.37072	4.09716	3.87309	4.32123	1.98104	1.86855	2.09353	0.430398	-0.788783	-0.764871	-0.45655	-2.13703	-1.34238	-1.52226	-1.30115	-1.61388	-4.41374	-1.7993	-0.35628	-1.76329	-0.285567	-0.963961	2.12058	1.12058	2.8309	0.269647	0.925724	1.55402	1.20888	0.138768	3.16498	-1.30807	0.914269	0.512547	-0.121083	-0.942571	0.515473	1.94843	-0.319449	2.20765
UUGAAA	NA	0.175239	0.124773	0.225705	1.87185	1.626	2.11771	0.181717	-0.0670891	0.430523	4.58537	4.0974	5.07333	0.629405	0.515643	0.743167	2.5083	3.21924	5.95582	10.4774	9.8041	4.62223	11.0239	10.2006	9.03137	14.2408	20.26	15.4741	14.6389	4.8868	4.83963	7.58924	8.31332	8.53466	14.2585	5.75565	10.6757	14.5487	13.3814	11.8869	17.6027	12.5845	8.00525	10.0332	9.19112	9.52815	11.358	11.3819	10.7943
UUGAAG	NA	0.174152	0.102166	0.246137	0.974556	0.700045	1.24907	0.234587	-0.0202125	0.489386	2.95161	2.14535	3.75786	0.688737	0.513395	0.864079	5.8352	4.69094	3.76334	11.6349	9.99211	12.7647	17.0117	9.10881	7.58857	14.5407	4.43763	11.9077	13.1907	8.32085	9.66772	6.03273	12.986	12.6176	11.6127	12.6396	6.43994	6.84973	8.8643	5.14394	13.1564	11.7942	12.5798	15.8373	7.93508	9.35394	3.90453	7.70145	13.1559
UUGUAU	UA-rich_d2	2.30061	2.18776	2.41345	1.04513	0.698037	1.39222	1.23239	1.06246	1.40232	3.2824	2.91613	3.64867	1.16058	1.01198	1.30918	-0.462692	-0.47116	-0.965012	-0.956693	-1.27106	-1.21207	-2.96153	-2.53002	-1.11991	-0.424559	-1.54004	-1.17959	-0.972758	-1.32034	-0.146161	-1.63816	-0.53826	-0.0208488	-1.09167	-1.22721	-2.38517	-1.35913	-0.523847	0	-0.520748	-0.479732	-0.0574078	-2.47564	-1.40875	-0.972521	-3.08956	-0.808194	0
UUGUUU	U-rich_d1	0.559005	0.492608	0.625402	0.504829	0.293476	0.716181	2.04398	1.85449	2.23347	3.03969	2.6964	3.38297	1.96805	1.82744	2.10867	0.0374295	0.652264	-2.98235	-1.29903	-1.69984	-1.16706	-0.461847	0.640413	1.69199	-1.37447	1.31489	0.43174	2.09342	-1.1956	0.729069	0.751441	-0.121993	-0.0219582	0.901213	-0.00422168	1.05464	0.434143	1.13989	0.510186	-0.333838	0.019324	-0.965504	1.18482	0.378076	1.63883	-0.3875	0.386645	1.20057
UUUAAU	U-rich_d2	1.30592	1.22511	1.38674	2.77669	2.63011	2.92327	1.20331	1.06662	1.34001	4.85176	4.44021	5.2633	0.834851	0.732834	0.936868	-0.515201	-1.86754	-0.120473	-1.85631	-0.536868	0.0482236	-0.975344	-1.29061	-2.64801	-2.16718	-1.62944	-0.685528	0.580345	-1.12956	-1.15655	2.58817	-1.4194	-0.883566	-0.497489	2.87818	-0.805428	-0.899845	-1.21539	-0.391734	-1.92362	-1.61304	-2.24152	-2.8659	-4.73129	0.0435704	-0.849238	-2.05961	-3.10208
UUUACU	U-rich_d2	0.871737	0.775769	0.967705	1.03539	0.824016	1.24676	1.4406	1.29481	1.58639	4.34334	3.92737	4.75932	1.23071	1.09493	1.36648	0.306235	-0.00706877	0.0962962	-1.17486	-0.316549	-0.0492446	-0.355553	-1.48996	-3.49839	-0.585585	-2.03326	0.0490712	0.233053	-0.000216265	-1.49268	-1.08139	-0.366608	0.0897276	-0.203907	0.0680815	-0.823276	1.64033	-1.9267	0.0656474	-0.0599125	-0.53139	0.291845	-1.66766	-1.66161	-0.278959	-1.73233	-1.69872	-0.408779
UUUAUA	UA-rich_d1	2.76813	2.6893	2.84696	2.0335	1.76701	2.29999	1.03298	0.866096	1.19987	3.99113	3.71832	4.26393	1.00442	0.904925	1.10392	-1.70135	-0.149581	-1.69486	-0.85841	-2.21802	-1.2805	-0.0893751	-0.0731405	-1.06132	-1.79059	0.418407	-1.2219	-2.41094	-0.425778	-1.55763	-1.06036	-3.34772	-0.346165	-0.0483939	-3.56292	-0.183838	-0.0286291	-1.28572	0.915662	-1.25146	-1.72155	-2.9648	-0.371923	-1.62721	-1.10082	-1.82314	-1.19105	-3.60847
UUUAUU	U-rich_d1	1.20708	1.14687	1.26729	1.15514	1.01172	1.29857	2.01713	1.90156	2.13269	4.5345	4.26409	4.8049	1.77577	1.67864	1.8729	-0.0460363	-1.82629	-0.609838	-3.11277	-3.86618	-2.06456	-2.21028	-1.35927	-0.399608	-1.2018	-1.98038	-1.08642	-0.714516	-0.133187	-0.455782	-1.02207	0.75416	4.06248	1.94523	0.0993239	-0.443329	-0.0272875	-0.807449	-1.5393	-0.328866	3.05025	0.351876	-3.75133	-1.21331	0.342919	0.235595	-0.163312	0.126937
UUUCAA	NA	0.199408	0.15003	0.248787	1.65036	1.42715	1.87358	0.851567	0.665738	1.0374	5.635	5.27949	5.9905	1.09619	1.00047	1.19191	0.0265915	3.99157	0.309155	3.55878	5.48205	1.95669	1.47315	2.94974	3.03789	2.62112	3.40107	3.39737	2.08075	1.63351	2.19848	1.01372	3.38201	3.11904	4.83316	6.89273	3.78768	3.01408	3.83497	2.2496	1.14621	3.18929	3.80076	0	5.08908	2.97411	2.09134	4.29354	5.36795
UUUCAU	U-rich_d2	0.700381	0.632202	0.768559	0.440255	0.221202	0.659307	1.29363	1.14724	1.44002	5.64259	5.2827	6.00248	1.46791	1.33946	1.59636	0.121629	0.860014	-4.05297	-0.41108	-0.752178	-1.61729	0.425769	-0.986473	0.818669	0.169959	-0.166523	0.326214	0.236264	-1.4032	-0.285169	0.467166	-0.472735	0.545942	-0.288838	0.44288	-0.989294	0.686964	-0.0298276	1.15234	0.79166	0.758615	0.989519	-0.245894	-0.0796472	-0.774645	0.762401	0.597765	0.789583
UUUCCU	U-rich_d2	0.262089	0.204166	0.320012	-0.619818	-0.999246	-0.24039	1.19408	0.973259	1.41491	4.14799	3.80554	4.49045	1.59971	1.46317	1.73625	0.10277	-0.206692	-0.496773	-0.462092	-0.746705	-0.212269	-0.66603	-0.216588	-0.228431	-0.796165	-0.400563	-1.73109	0.631869	3.56096	0.0541821	-0.0185308	0	0.350778	0.957719	0.28852	-0.146999	1.0695	1.3677	0.123969	0.129471	0.900637	-0.863629	-0.361165	0.478794	0.769576	0.791527	0.285811	-0.488366
UUUCUA	U-rich_d2	1.01334	0.925987	1.1007	0.950068	0.682889	1.21725	1.26849	1.09876	1.43822	4.50791	4.26091	4.75491	1.39648	1.28571	1.50725	-0.522175	-0.666079	-0.0790729	-0.126512	-1.36812	-1.23242	2.22487	-2.04848	-0.485015	-1.08088	-1.74635	-2.51135	-1.34502	-0.55288	-1.58204	-0.295137	-1.31294	-1.24262	-0.0630822	-1.69063	-0.128909	1.59094	0.113822	-1.04486	3.48534	-1.37856	-1.59464	-2.06919	0.665963	-0.117448	-0.169898	-1.61188	-1.91953
UUUCUU	U-rich_d1	0.547193	0.500607	0.593779	0.118946	-0.0822993	0.320191	1.96462	1.83615	2.09309	4.03292	3.78238	4.28346	2.06299	1.95871	2.16727	-0.153579	-0.898726	-0.601858	-1.57551	-2.23699	-2.18068	-1.33604	-1.13906	-0.841114	-0.280494	-1.94974	-1.52339	-1.73537	-0.824761	2.21031	-0.260591	2.57011	0.00821811	0.807423	-0.768918	3.19387	1.05297	2.04751	-2.32019	0.0608583	0.678792	-0.195059	0.705355	0.931194	-1.47997	-0.0465173	3.28962	0.916558
UUUGAA	NA	0.113924	0.0660945	0.161754	1.42772	1.21633	1.63911	0.705748	0.473262	0.938234	5.18487	4.74916	5.62058	1.05571	0.918159	1.19326	0.452396	3.67146	6.25783	8.76617	5.19719	4.61957	6.2716	4.80776	11.1708	6.50348	11.1301	13.5835	5.53385	2.71337	6.53554	6.57368	7.7898	18.0241	7.84647	4.88807	8.84305	6.33041	3.61783	14.108	6.78238	7.96116	8.91223	5.77923	2.67618	6.81775	6.87696	10.0898	8.61494
UUUGUA	U-rich_d2	1.95175	1.86168	2.04183	1.37933	1.0565	1.70216	1.1648	0.981951	1.34765	3.7726	3.43216	4.11304	1.23127	1.10069	1.36186	-1.419	-1.59321	-0.862555	-0.933508	-0.937446	-0.912466	-2.53805	-3.66488	-1.02169	-1.82274	-1.15663	-1.20913	-0.587926	-1.77471	-1.49484	-1.05501	-3.25529	-0.783879	-0.224817	-0.389537	-0.766764	0	-1.04682	0	-0.67095	-0.142386	-0.324036	-0.40873	-3.28706	0.347804	-1.69747	-0.0514178	-0.612279
UUUGUU	U-rich_d1	0.394111	0.339742	0.44848	0.47381	0.21425	0.73337	1.88198	1.69375	2.07022	3.34247	3.00908	3.67585	1.96564	1.81848	2.11281	-0.351979	-2.0014	-0.303778	0.577441	-0.0663329	-0.165143	-1.48587	1.65634	-0.38657	1.50549	0.6113	1.04613	-0.4586	0.593102	1.10991	3.46436	3.04108	3.01352	0.676411	1.64318	1.86618	-0.285505	1.30377	1.2602	-0.997757	1.12817	0.27772	0.736655	2.93523	0.622222	1.00708	0.567862	1.18392
UUUUAA	U-rich_d2	0.923986	0.856438	0.991535	2.65312	2.50348	2.80277	1.04336	0.865933	1.22079	5.54466	5.24058	5.84874	0.989488	0.89311	1.08587	-0.666606	0.1597	-1.09148	-0.318251	0.628466	-0.0873598	-0.624089	0.214426	0.864083	-1.00823	1.07822	0.195754	0.874647	-0.671628	-0.210526	0.391786	0.607075	0.280095	0.423983	1.36591	1.98792	2.42676	1.12793	0.537919	-0.506944	-0.319976	-0.40437	-2.3846	1.17807	0.498187	0.0621958	0.489676	0.438446
UUUUAC	U-rich_d2	0.7727	0.692169	0.853231	0.569778	0.353356	0.786201	1.36832	1.1901	1.54654	4.94758	4.56815	5.32702	1.547	1.39641	1.69759	-0.930241	0.143595	0.0810116	-1.61083	-0.91752	-0.569342	-0.490738	-1.70678	-1.07409	-0.680196	-1.07585	-0.223575	-0.71533	-1.42606	0.295095	5.05624	0.562993	0.0774697	0.942697	-0.260251	0.975417	0.5787	1.27003	0.132304	-0.817092	0.624431	0.791521	0.245056	-0.783933	0.645573	-0.313953	-0.9665	0.924544
UUUUAU	U-rich_d1	1.72868	1.65536	1.802	1.32189	1.15514	1.48864	1.72018	1.60554	1.83482	4.78211	4.5152	5.04902	1.88823	1.78257	1.99389	-0.659729	-0.121205	-1.41212	-4.07759	-0.425499	-1.24437	-0.872845	-1.8916	-1.03689	-1.09249	-1.26326	-0.63565	-0.807178	-1.34812	1.13725	0.85183	0.613422	1.88502	-0.196634	0.326937	0.148581	-0.784034	-0.887492	-0.495509	-2.14068	0.174943	0.430268	-3.02196	0.450459	1.05158	-0.998654	-0.392644	2.13471
UUUUCA	U-rich_d2	0.334895	0.288472	0.381317	0.761545	0.493335	1.02976	1.204	1.02209	1.38591	5.96496	5.68115	6.24878	1.65675	1.54802	1.76549	1.4633	0.0558692	-0.0301622	0.356915	-0.0911539	-0.452066	0.647341	0.225006	0.13836	-0.0774251	-0.492601	0.23131	-0.821662	0.920405	0.0900709	3.04834	1.05459	2.4823	1.02799	1.80488	1.66695	3.59278	1.06662	1.2544	0.335147	2.47797	-0.266679	1.47455	0.0416775	1.65323	1.31191	0.529657	0.849283
UUUUCC	U-rich_d2	0.211454	0.159306	0.263601	0.0253121	-0.296425	0.347049	1.38964	1.12141	1.65786	4.25735	3.91657	4.59813	1.8043	1.67859	1.93001	-0.0234274	0.848958	0.470257	-0.340367	0.277283	0.244851	0.270468	-0.0805336	0.239047	-1.50751	0.518651	1.28864	0.265364	0.0220292	0.832715	0.431581	0.344378	2.08846	2.19473	-0.147754	1.31766	1.88202	0.627597	0.830998	0.557863	-0.00621283	0.681631	0.820467	-0.115809	-0.0141625	1.72361	1.46999	2.86113
UUUUCU	U-rich_d1	0.528764	0.480449	0.57708	0.0899182	-0.100789	0.280625	1.90367	1.77378	2.03356	4.16871	3.95914	4.37827	2.23151	2.13104	2.33199	-0.494133	-0.218547	-0.778335	-1.30815	-2.23698	1.98925	-2.46619	-0.612154	-0.515877	-1.58381	-0.991316	-1.1852	-0.552589	0.62312	-0.416881	3.53832	-0.449308	2.75841	0.687968	1.50187	2.27254	1.44248	0.148259	1.10849	1.20767	0.888668	-1.56197	1.15002	-0.570618	0.0204799	3.05848	2.64892	1.92937
UUUUGA	U-rich_d2	0.0333083	-0.0150334	0.0816501	0.741716	0.424658	1.05877	1.14923	0.94157	1.35689	4.99042	4.5853	5.39553	1.44039	1.30989	1.57089	1.40261	3.57842	3.96075	2.76433	1.93066	0.990562	1.77186	5.50513	2.6572	5.2254	7.64465	2.68094	2.18447	1.35395	3.67868	5.75917	11.1336	2.90214	3.31967	5.33397	1.05463	3.71359	10.5196	4.63732	2.56052	2.31357	4.35889	1.98544	3.19703	4.89652	4.27497	7.70964	0.436227
UUUUGU	U-rich_d1	1.16359	1.0798	1.24738	0.63808	0.403976	0.872183	1.85578	1.71225	1.9993	3.0841	2.82833	3.33987	1.94944	1.81668	2.08219	-2.04684	-0.969149	1.28962	-1.1247	-0.347603	-2.31449	0.522463	0	0.743949	0.499519	-0.601957	0.186882	-1.15608	0.488883	0.55094	1.24271	0.562029	0.343094	1.01341	-0.397171	-0.117863	0.487232	0.0601327	-1.33904	0.202157	-0.250787	0.168348	0.681841	1.99135	-2.01684	0.223464	0.663374	1.93556
UUUUUA	U-rich_d1	1.2204	1.16355	1.27725	1.65331	1.47144	1.83518	1.5639	1.44118	1.68663	5.35765	5.12795	5.58735	1.80937	1.71494	1.9038	-1.08046	-1.62066	-2.52457	0.00999799	-0.821412	-1.62361	-2.70246	-2.44065	-1.57403	-0.435744	-1.29416	-0.507781	-3.60529	-0.97448	2.89289	0.663272	0.0708071	0.447979	-0.0258207	0.193383	-0.5178	-0.694405	-2.12727	-0.29788	-0.201802	-1.04186	-0.194616	-0.0665751	0.61484	-0.255106	-1.04534	0.14426	-0.312887
UUUUUC	U-rich_d1	0.395609	0.353989	0.437229	0.138589	-0.0459228	0.3231	1.68196	1.5443	1.81962	4.76428	4.56543	4.96313	2.30588	2.21423	2.39754	0.0563362	-0.544743	-0.60841	-2.00859	-1.37408	-2.60558	0.278844	-0.395719	-0.470474	-3.22355	0.304532	-3.23492	-0.339332	-0.805977	2.0919	-0.267341	1.48153	0.214005	2.20173	2.04556	2.64895	2.06338	0.147095	2.56861	1.94357	-1.74728	1.78294	-1.14307	0.813026	2.62869	2.59502	0.976904	0.450134
UUUUUG	U-rich_d1	0.518275	0.455725	0.580825	0.683103	0.44528	0.920925	1.86054	1.72124	1.99985	3.67288	3.42083	3.92493	1.9324	1.81233	2.05247	0.661615	2.30784	1.69613	0.359116	0.393148	0.78949	2.88837	2.61623	1.16274	3.32718	-0.31459	1.8697	0.242575	1.60595	0.492976	4.8813	1.35479	2.32896	1.53892	3.5578	2.69699	6.81792	0.724227	1.53392	0.858741	2.76382	3.05947	1.75214	3.53417	2.84742	0.97905	0.88938	0.559474
UUUUUU	U-rich_d0	0.726435	0.695695	0.757174	0.967886	0.797321	1.13845	2.92603	2.82988	3.02219	2.56248	2.39659	2.72837	2.67231	2.61144	2.73317	-1.97598	-2.05422	-3.32712	-3.94042	-0.121186	-3.07749	-2.6731	-1.11078	-3.08117	-0.634366	-1.78803	-0.46182	0.173578	0.0903494	0.820513	4.45358	5.91048	7.70632	9.51952	7.81133	7.90011	5.69661	9.54445	6.45888	4.41646	4.41515	3.42545	4.45507	3.95547	2.65172	3.81135	1.71965	3.27513
[truncated: 468 more columns]
