# Supplementary material for: Delineating yeast cleavage and polyadenylation signals using deep learning
Source: HighWire-hosted journal article supplement (doi:10.1101/gr.278606.123), 2024-06-24
Supplement: Supplemental_Table_S4.xlsx [file Supplemental_Table_S4.xlsx]

## Sheet: Legend
Table S4. The poly(A) sites identified in S. cerevisiae.
This table contains the locations and summary characteristics for clustered poly(A) sites identified in S.cerevisiae.
Descriptions of the table columns:
Chromosome	Chromosome where the poly(A) site cluster is located.
ClusterStart	The 0-based start coordinate of the poly(A) site cluster.
ClusterEnd	The 0-based end coordinate of the poly(A) site cluster, exclusive.
RepresentativeSite	The 0-based position of the representative site within the cluster, supported by the most 3'READS.
Strand	Strand, either + or -.
Gene	The assigned gene symbol where the cluster is located.
Feature	The location within the gene where the cluster is located (i.e. exon, intron, 3'UTR, etc.).
RelativePosition	If the poly(A) site cluster is located in the 3'UTR or downstream extended region, is the site the first, middle, or last site compared to other poly(A) site clusters.
Supporting 3'READS	The sum of 3'READS within the cluster boundaries.
Usage	For genes with multiple poly(A) sites, the usage level was calculated as the ratio of supporting 3'READS versus the reads supporting the top 2 3'UTR sites in the same gene.

## Sheet: PolyA sites
Chrom	ClusterStart	ClusterEnd	RepresentativeSite	Strand	Gene	Feature	RelativePosition	Supporting3'READS	Usage
I	21535	21556	21536	+	YAL064W	utr5	utr5	10.3333	0.203947
I	21658	21686	21669	+	YAL064W	coding_exon	CDS	17	0.335526
I	21947	21968	21957	+	YAL064W	utr3	first	16	0.315789
I	21988	22000	21997	+	YAL064W	utr3	middle	34.6667	0.684211
I	22011	22016	22011	+	YAL064W	utr3	last	11.5	0.226974
I	31191	31206	31199	+	YAL062W	utr5	utr5	10	0.0158479
I	31522	31556	31537	+	YAL062W	utr5	utr5	23.4333	0.0371368
I	31586	31608	31596	+	YAL062W	coding_exon	CDS	14	0.022187
I	31608	31632	31619	+	YAL062W	coding_exon	CDS	25.9	0.041046
I	31632	31656	31637	+	YAL062W	coding_exon	CDS	25.0429	0.0396876
I	33002	33015	33010	+	YAL062W	utr3_extended	first	220.083	0.348785
I	33015	33042	33027	+	YAL062W	utr3_extended	middle	410.917	0.651215
I	33059	33070	33068	+	YAL062W	utr3_extended	middle	11	0.0174326
I	33312	33329	33322	+	YAL062W	utr3_extended	last	27.5	0.0435816
I	34829	34854	34841	+	YAL061W	utr3	first	316.5	0.330548
I	34854	34880	34867	+	YAL061W	utr3	middle	310.5	0.324282
I	34905	34931	34916	+	YAL061W	utr3	middle	641	0.669452
I	34931	34957	34934	+	YAL061W	utr3	middle	19	0.0198433
I	35052	35075	35064	+	YAL061W	utr3	middle	29	0.0302872
I	35075	35088	35079	+	YAL061W	utr3	middle	10.5	0.0109661
I	35217	35249	35245	+	YAL061W	utr3_extended	middle	26.75	0.0279373
I	35249	35273	35262	+	YAL061W	utr3_extended	middle	44.5	0.0464752
I	35303	35334	35323	+	YAL061W	utr3_extended	middle	16.5	0.0172324
I	35390	35418	35401	+	YAL061W	utr3_extended	last	11	0.0114883
I	36354	36375	36364	+	YAL060W	utr3_extended	first	170.667	0.0445198
I	36375	36400	36386	+	YAL060W	utr3_extended	middle	1915.67	0.499717
I	36400	36425	36414	+	YAL060W	utr3_extended	middle	1917.83	0.500283
I	36425	36446	36427	+	YAL060W	utr3_extended	last	65	0.0169558
I	37246	37262	37251	+	YAL059W	utr3_extended	first	84	0.257537
I	37262	37291	37271	+	YAL059W	utr3_extended	middle	64	0.196219
I	37291	37327	37310	+	YAL059W	utr3_extended	middle	242.167	0.742463
I	37357	37382	37370	+	YAL059W	utr3_extended	last	18.7	0.0573327
I	38988	38999	38990	+	YAL058W	utr3	first	27.1667	0.0172944
I	38999	39020	39009	+	YAL058W	utr3_extended	middle	1286	0.818674
I	39020	39042	39030	+	YAL058W	utr3_extended	middle	284.833	0.181326
I	39089	39114	39103	+	YAL058W	utr3_extended	middle	70.25	0.0447215
I	39114	39128	39122	+	YAL058W	utr3_extended	middle	31.8333	0.0202653
I	39143	39175	39162	+	YAL058W	utr3_extended	last	19.3333	0.0123077
I	40532	40567	40547	+	YAL056W	coding_exon	CDS	62.0833	0.287201
I	40567	40597	40587	+	YAL056W	coding_exon	CDS	106	0.490362
I	41515	41520	41515	+	YAL056W	coding_exon	CDS	10	0.0462606
I	41625	41654	41636	+	YAL056W	coding_exon	CDS	24.1667	0.111796
I	41801	41821	41801	+	YAL056W	coding_exon	CDS	10	0.0462606
I	41969	41987	41979	+	YAL056W	utr3_extended	first	128.667	0.59522
I	41987	42009	41998	+	YAL056W	utr3_extended	middle	87.5	0.40478
I	42009	42030	42017	+	YAL056W	utr3_extended	middle	40.4167	0.18697
I	42030	42046	42039	+	YAL056W	utr3_extended	last	11.4643	0.0530345
I	42782	42805	42803	+	YAL055W	utr3	first	10.4167	0.215889
I	42805	42832	42816	+	YAL055W	utr3	last	37.8333	0.784111
I	48299	48334	48314	+	YAL053W	utr3	single	4357.17	1
I	49888	49905	49897	+	YAL051W	coding_exon	CDS	10.25	0.0394104
I	49961	49971	49965	+	YAL051W	coding_exon	CDS	31	0.119193
I	49985	49993	49992	+	YAL051W	coding_exon	CDS	25	0.096123
I	51072	51077	51076	+	YAL051W	coding_exon	CDS	12	0.0461391
I	51784	51799	51788	+	YAL051W	utr3	first	63.5833	0.244473
I	51823	51845	51838	+	YAL051W	utr3_extended	middle	23.5	0.0903557
I	51845	51869	51855	+	YAL051W	utr3_extended	middle	196.5	0.755527
I	51869	51886	51869	+	YAL051W	utr3_extended	last	10.8333	0.0416533
I	57950	57975	57960	+	YAL044W-A	utr3	first	659.667	0.679718
I	57975	58001	57989	+	YAL044W-A	utr3	middle	56.8333	0.0585609
I	58001	58034	58012	+	YAL044W-A	utr3	last	310.833	0.320282
I	62631	62662	62645	+	YAL042W	utr3_extended	first	2779	0.913193
I	62662	62690	62679	+	YAL042W	utr3_extended	middle	264.167	0.0868065
I	62690	62718	62699	+	YAL042W	utr3_extended	last	40.0333	0.0131552
I	64117	64147	64134	+	YAL041W	coding_exon	CDS	11.1667	0.106097
I	65160	65194	65173	+	YAL041W	coding_exon	CDS	16	0.152019
I	65424	65451	65440	+	YAL041W	utr3	first	53.4167	0.507522
I	65451	65479	65462	+	YAL041W	utr3	middle	51.8333	0.492478
I	65479	65511	65481	+	YAL041W	utr3	middle	19	0.180523
I	65589	65606	65594	+	YAL041W	utr3_extended	middle	11.5	0.109264
I	65606	65623	65609	+	YAL041W	utr3_extended	last	12.5	0.118765
I	73294	73315	73308	+	YAL038W	utr3	first	287.667	0.0169209
I	73315	73333	73325	+	YAL038W	utr3	middle	695.667	0.04092
I	73358	73384	73370	+	YAL038W	utr3	middle	2521.5	0.148318
I	73384	73412	73398	+	YAL038W	utr3	middle	1138.83	0.0669876
I	73412	73439	73426	+	YAL038W	utr3_extended	middle	10074.3	0.592585
I	73439	73462	73451	+	YAL038W	utr3_extended	middle	6926.33	0.407415
I	73462	73486	73466	+	YAL038W	utr3_extended	last	298.333	0.0175483
I	73903	73920	73909	+	YAL037W	utr5	utr5	25.8333	0.383189
I	74859	74876	74870	+	YAL037W	utr3_extended	first	28.5	0.422744
I	74909	74926	74915	+	YAL037W	utr3_extended	middle	10.1667	0.150803
I	74951	74974	74965	+	YAL037W	utr3_extended	middle	38.9167	0.577256
I	74985	75006	74986	+	YAL037W	utr3_extended	last	10.6667	0.15822
I	79519	79545	79530	+	YAL035W	utr3_extended	first	2489.17	0.287278
I	79545	79572	79560	+	YAL035W	utr3_extended	last	6175.5	0.712722
I	79683	79712	79698	+	YAL034W-A	utr5	utr5	12.2167	0.104766
I	80521	80522	80521	+	YAL034W-A	coding_exon	CDS	10	0.0857563
I	80561	80591	80567	+	YAL034W-A	coding_exon	CDS	15.1667	0.130064
I	80591	80627	80614	+	YAL034W-A	utr3	first	28.3333	0.242976
I	80655	80677	80666	+	YAL034W-A	utr3_extended	middle	30.4429	0.261067
I	80730	80755	80743	+	YAL034W-A	utr3_extended	last	86.1667	0.738933
I	82994	83008	83007	+	YAL033W	coding_exon	CDS	10.5	0.0449038
I	83258	83287	83282	+	YAL033W	utr3	first	118.333	0.506058
I	83287	83309	83298	+	YAL033W	utr3	middle	111	0.474697
I	83309	83331	83315	+	YAL033W	utr3	middle	34	0.145403
I	83331	83357	83342	+	YAL033W	utr3_extended	middle	115.5	0.493942
I	83357	83383	83362	+	YAL033W	utr3_extended	middle	51	0.218104
I	83383	83405	83394	+	YAL033W	utr3_extended	middle	61.3333	0.262295
I	83405	83425	83406	+	YAL033W	utr3_extended	middle	33.1667	0.141839
I	83439	83460	83459	+	YAL033W	utr3_extended	last	10	0.0427655
I	87850	87877	87861	+	YAL030W	utr3_extended	first	144.333	0.366019
I	87877	87914	87893	+	YAL030W	utr3_extended	middle	250	0.633981
I	87914	87948	87934	+	YAL030W	utr3_extended	middle	36.6667	0.0929839
I	87973	88002	87985	+	YAL030W	utr3_extended	last	15.8333	0.0401522
I	94520	94532	94528	+	YAL028W	utr3	first	138	0.613788
I	94559	94581	94567	+	YAL028W	utr3	last	86.8333	0.386212
I	95385	95413	95400	+	YAL027W	coding_exon	CDS	75.25	0.333456
I	95413	95428	95414	+	YAL027W	coding_exon	CDS	10.1667	0.0450517
I	95549	95563	95558	+	YAL027W	utr3_extended	first	13.8333	0.0612999
I	95563	95592	95577	+	YAL027W	utr3_extended	last	211.833	0.9387
I	117904	117924	117913	+	YAL019W	coding_exon	CDS	20	0.387722
I	117946	117968	117957	+	YAL019W	coding_exon	CDS	18	0.34895
I	118294	118304	118303	+	YAL019W	coding_exon	CDS	16	0.310178
I	118373	118397	118385	+	YAL019W	utr3	first	35.3333	0.684976
I	118541	118570	118559	+	YAL019W	utr3_extended	last	16.25	0.315024
I	121039	121072	121059	+	YAL017W	coding_exon	CDS	24.0833	0.0835308
I	124435	124465	124451	+	YAL017W	utr3_extended	first	164.783	0.571536
I	124465	124490	124478	+	YAL017W	utr3_extended	middle	123.533	0.428464
I	124490	124509	124493	+	YAL017W	utr3_extended	last	16.5833	0.0575178
I	125706	125739	125719	+	YAL016W	coding_exon	CDS	11.5	0.0166546
I	125855	125867	125863	+	YAL016W	coding_exon	CDS	11	0.0159305
I	126068	126095	126078	+	YAL016W	coding_exon	CDS	50.3333	0.072894
I	126674	126705	126694	+	YAL016W	coding_exon	CDS	17.5	0.025344
I	126841	126856	126843	+	YAL016W	utr3	first	48.5	0.070239
I	126856	126882	126869	+	YAL016W	utr3	last	642	0.929761
I	130552	130576	130570	+	YAL013W	utr3	first	567.667	0.126565
I	130576	130604	130587	+	YAL013W	utr3_extended	last	3917.5	0.873435
I	132069	132092	132081	+	YAL012W	utr3	first	147665	0.974458
I	132092	132117	132094	+	YAL012W	utr3	last	3870.5	0.0255419
I	134153	134183	134172	+	YAL011W	utr3_extended	single	306.4	1
I	136702	136721	136710	+	YAL009W	utr3_extended	first	241.5	0.427182
I	136721	136744	136732	+	YAL009W	utr3_extended	middle	242.333	0.428656
I	136744	136767	136755	+	YAL009W	utr3_extended	middle	323	0.571344
I	136767	136788	136774	+	YAL009W	utr3_extended	last	18.3333	0.0324292
I	137612	137628	137615	+	YAL008W	utr3	first	28.6	0.0838259
I	137628	137663	137641	+	YAL008W	utr3	middle	176.683	0.517855
I	137663	137695	137684	+	YAL008W	utr3_extended	middle	164.5	0.482145
I	137695	137716	137704	+	YAL008W	utr3_extended	last	22.8333	0.0669239
I	143347	143370	143367	+	YAL003W	utr3_extended	first	28619.5	0.126147
I	143370	143392	143380	+	YAL003W	utr3_extended	middle	198255	0.873853
I	143392	143424	143392	+	YAL003W	utr3_extended	middle	19220.8	0.0847197
I	143424	143455	143444	+	YAL003W	utr3_extended	last	1819.9	0.00802161
I	144686	144702	144691	+	YAL002W	coding_exon	CDS	124.5	0.0942611
I	144725	144741	144729	+	YAL002W	coding_exon	CDS	43	0.032556
I	145841	145856	145848	+	YAL002W	coding_exon	CDS	16.5	0.0124924
I	146184	146195	146184	+	YAL002W	coding_exon	CDS	22	0.0166566
I	146195	146221	146197	+	YAL002W	coding_exon	CDS	28.6667	0.021704
I	146253	146278	146268	+	YAL002W	coding_exon	CDS	18.4167	0.0139436
I	146404	146415	146404	+	YAL002W	coding_exon	CDS	11.5	0.00870684
I	147018	147040	147025	+	YAL002W	coding_exon	CDS	146.167	0.110665
I	147040	147056	147041	+	YAL002W	coding_exon	CDS	27.6667	0.0209469
I	147188	147215	147206	+	YAL002W	coding_exon	CDS	32.7	0.0247577
I	147229	147254	147234	+	YAL002W	coding_exon	CDS	19.5	0.0147638
I	147512	147548	147545	+	YAL002W	utr3	first	20.5833	0.015584
I	147548	147575	147564	+	YAL002W	utr3_extended	middle	196.8	0.149001
I	147575	147597	147586	+	YAL002W	utr3_extended	middle	1124	0.850999
I	147597	147625	147600	+	YAL002W	utr3_extended	middle	30	0.0227135
I	147625	147662	147643	+	YAL002W	utr3_extended	last	66.4333	0.0502978
I	152972	152999	152984	+	YAR002W	coding_exon	CDS	71.9167	0.024636
I	152999	153025	152999	+	YAR002W	coding_exon	CDS	21.6667	0.00742221
I	153190	153212	153201	+	YAR002W	coding_exon	CDS	76.25	0.0261205
I	153212	153235	153222	+	YAR002W	coding_exon	CDS	36.6667	0.0125607
I	153888	153915	153895	+	YAR002W	utr3	first	230.333	0.0789038
I	153915	153952	153934	+	YAR002W	utr3	middle	111.433	0.038173
I	153952	153980	153969	+	YAR002W	utr3_extended	middle	2688.83	0.921096
I	153980	153994	153980	+	YAR002W	utr3_extended	middle	112.167	0.0384242
I	154062	154091	154081	+	YAR002W	utr3_extended	last	20.619	0.00706333
I	155543	155556	155552	+	YAR003W	coding_exon	CDS	19.5	0.0191192
I	155556	155580	155569	+	YAR003W	coding_exon	CDS	74.0667	0.0726203
I	155580	155595	155588	+	YAR003W	coding_exon	CDS	13	0.0127461
I	155620	155638	155633	+	YAR003W	coding_exon	CDS	12.2	0.0119618
I	156004	156020	156008	+	YAR003W	coding_exon	CDS	310.167	0.30411
I	156576	156597	156585	+	YAR003W	utr3_extended	first	57.5	0.0563772
I	156597	156619	156608	+	YAR003W	utr3_extended	middle	52.5	0.0514748
I	156680	156706	156687	+	YAR003W	utr3_extended	middle	16.75	0.0164229
I	156742	156763	156759	+	YAR003W	utr3_extended	middle	74.9167	0.0734537
I	156763	156796	156779	+	YAR003W	utr3_extended	middle	544.583	0.533949
I	156827	156842	156827	+	YAR003W	utr3_extended	middle	25.1667	0.0246752
I	156842	156869	156857	+	YAR003W	utr3_extended	middle	475.333	0.466051
I	156869	156884	156872	+	YAR003W	utr3_extended	middle	16	0.0156876
I	156895	156923	156903	+	YAR003W	utr3_extended	last	63	0.0617698
I	159839	159874	159859	+	YAR008W	utr3_extended	first	137	0.47133
I	159874	159902	159888	+	YAR008W	utr3_extended	middle	153.667	0.52867
I	159902	159927	159915	+	YAR008W	utr3_extended	middle	111.25	0.382741
I	159927	159950	159938	+	YAR008W	utr3_extended	last	16.5	0.0567661
I	170378	170402	170389	+	YAR015W	utr3	first	2761	0.101276
I	170402	170431	170414	+	YAR015W	utr3_extended	middle	20797.5	0.76287
I	170431	170458	170447	+	YAR015W	utr3_extended	middle	6464.67	0.23713
I	170458	170481	170469	+	YAR015W	utr3_extended	last	519	0.0190374
I	184520	184545	184530	+	YAR027W	utr3	first	1703.67	0.422676
I	184545	184579	184559	+	YAR027W	utr3	middle	1234.67	0.306318
I	184579	184611	184598	+	YAR027W	utr3	middle	10.8	0.00267946
I	184611	184639	184623	+	YAR027W	utr3_extended	middle	83.75	0.0207782
I	184639	184668	184654	+	YAR027W	utr3_extended	middle	2327	0.577324
I	184668	184694	184682	+	YAR027W	utr3_extended	last	81.3333	0.0201786
I	185781	185805	185793	+	YAR028W	utr3_extended	single	8331	1
I	186744	186760	186748	+	YAR029W	utr3_extended	first	217.167	0.736574
I	186760	186788	186766	+	YAR029W	utr3_extended	middle	77.6667	0.263426
I	186800	186815	186808	+	YAR029W	utr3_extended	last	49	0.166196
I	186826	186832	186826	+	YAR031W	utr5	utr5	27.6667	0.0101529
I	187851	187878	187869	+	YAR031W	utr3	first	185.333	0.0680122
I	187878	187906	187888	+	YAR031W	utr3	last	2539.67	0.931988
I	188855	188867	188861	+	YAR033W	utr3	first	35.3333	0.016756
I	188881	188909	188903	+	YAR033W	utr3	middle	650.867	0.308658
I	188909	188937	188922	+	YAR033W	utr3	middle	1457.83	0.691342
I	189042	189058	189046	+	YAR033W	utr3_extended	last	64	0.0303505
I	192344	192384	192364	+	YAR035W	utr3	first	222.5	0.370833
I	192384	192415	192408	+	YAR035W	utr3	middle	181.833	0.303056
I	192415	192439	192427	+	YAR035W	utr3	middle	377.5	0.629167
I	192439	192468	192440	+	YAR035W	utr3	last	156.667	0.261111
I	194000	194024	194016	+	YAR042W	coding_exon	CDS	19.1667	0.0124803
I	195224	195252	195241	+	YAR042W	coding_exon	CDS	30.8333	0.0200771
I	196293	196313	196302	+	YAR042W	utr3	first	1180	0.768354
I	196313	196334	196313	+	YAR042W	utr3	middle	194	0.126323
I	196334	196359	196344	+	YAR042W	utr3_extended	middle	355.75	0.231646
I	196359	196384	196373	+	YAR042W	utr3_extended	middle	90.65	0.0590265
I	196417	196447	196436	+	YAR042W	utr3_extended	middle	249.6	0.162526
I	196650	196671	196656	+	YAR042W	utr3_extended	middle	23.1667	0.0150849
I	196774	196793	196781	+	YAR042W	utr3_extended	middle	27.3333	0.017798
I	196793	196817	196793	+	YAR042W	utr3_extended	last	17.25	0.0112323
I	208072	208093	208081	+	YAR050W	utr3	first	109.833	0.736724
I	208093	208123	208105	+	YAR050W	utr3	last	39.25	0.263276
I	223008	223011	223010	+	YAR068W	utr3	single	23.5	1
I	226900	226924	226912	+	YAR071W	utr3	first	19268.7	0.999455
I	226924	226939	226924	+	YAR071W	utr3	last	10.5	0.000544629
II	5862	5884	5868	+	YBL109W	coding_exon	CDS	15.5	NA
II	24874	24904	24891	+	YBL102W	utr3	first	451.133	0.964097
II	24904	24928	24917	+	YBL102W	utr3	last	16.8	0.0359026
II	28681	28705	28701	+	YBL100W-C	utr3	first	44.6667	0.802395
II	29164	29181	29170	+	YBL100W-C	utr3_extended	last	11	0.197605
II	38792	38829	38823	+	YBL099W	utr3	first	78.25	0.0173718
II	38829	38856	38843	+	YBL099W	utr3	middle	909.167	0.201839
II	38856	38884	38856	+	YBL099W	utr3	middle	229	0.050839
II	38884	38910	38902	+	YBL099W	utr3	middle	2428.92	0.53923
II	38910	38938	38921	+	YBL099W	utr3_extended	middle	2075.5	0.46077
II	38938	38969	38955	+	YBL099W	utr3_extended	last	1564.17	0.347252
II	40645	40671	40658	+	YBL098W	utr3_extended	single	19.75	1
II	43252	43287	43272	+	YBL097W	utr3	first	196	0.152084
II	43287	43309	43302	+	YBL097W	utr3	middle	66	0.0512119
II	43338	43354	43344	+	YBL097W	utr3	middle	60.5	0.0469443
II	44125	44143	44125	+	YBL097W	utr3	middle	15.3333	0.0118977
II	44143	44171	44160	+	YBL097W	utr3	middle	232.429	0.18035
II	44171	44194	44175	+	YBL097W	utr3	middle	132.917	0.103135
II	44194	44217	44206	+	YBL097W	utr3	middle	1056.33	0.81965
II	44217	44228	44220	+	YBL097W	utr3	middle	96.5	0.0748781
II	44267	44280	44276	+	YBL097W	utr3_extended	last	35	0.0271578
II	46265	46295	46285	+	YBL092W	coding_exon	CDS	15.5	0.0148143
II	46310	46311	46310	+	YBL092W	coding_exon	CDS	17	0.016248
II	46326	46341	46339	+	YBL092W	coding_exon	CDS	27.3333	0.0261242
II	46401	46421	46405	+	YBL092W	utr3_extended	first	126.917	0.121302
II	46421	46450	46444	+	YBL092W	utr3_extended	middle	169.25	0.161763
II	46450	46478	46462	+	YBL092W	utr3_extended	middle	512.083	0.489431
II	46478	46505	46494	+	YBL092W	utr3_extended	middle	156.333	0.149418
II	46505	46527	46516	+	YBL092W	utr3_extended	middle	534.2	0.510569
II	46527	46548	46537	+	YBL092W	utr3_extended	middle	465	0.44443
II	46548	46570	46548	+	YBL092W	utr3_extended	last	38.75	0.0370359
II	49440	49470	49459	+	YBL090W	utr3_extended	first	1746	0.612095
II	49470	49491	49476	+	YBL090W	utr3_extended	last	1106.5	0.387905
II	49566	49589	49576	+	YBL089W	coding_exon	CDS	35.6667	0.0967669
II	50005	50026	50007	+	YBL089W	coding_exon	CDS	24	0.0651142
II	50026	50064	50045	+	YBL089W	coding_exon	CDS	456.333	1.23807
II	50995	51024	51009	+	YBL089W	utr3	first	226.25	0.613837
II	51024	51060	51039	+	YBL089W	utr3	middle	142.333	0.386163
II	51060	51091	51080	+	YBL089W	utr3_extended	middle	47.8333	0.129776
II	51091	51121	51100	+	YBL089W	utr3_extended	middle	37	0.100384
II	51121	51159	51140	+	YBL089W	utr3_extended	middle	33.3333	0.0904364
II	51159	51190	51177	+	YBL089W	utr3_extended	last	27	0.0732534
II	64522	64537	64533	+	YBL085W	coding_exon	CDS	29.3333	0.296796
II	65829	65853	65842	+	YBL085W	coding_exon	CDS	11.5833	0.117201
II	65853	65876	65864	+	YBL085W	coding_exon	CDS	35.3333	0.357504
II	65876	65889	65879	+	YBL085W	coding_exon	CDS	13.5	0.136594
II	66078	66106	66086	+	YBL085W	coding_exon	CDS	20.8333	0.210793
II	66880	66912	66893	+	YBL085W	utr3_extended	first	53.25	0.538786
II	66928	66940	66928	+	YBL085W	utr3_extended	middle	45.5833	0.461214
II	66940	66961	66940	+	YBL085W	utr3_extended	last	16.4167	0.166105
II	73008	73034	73017	+	YBL081W	utr3_extended	first	566	0.446666
II	73034	73067	73034	+	YBL081W	utr3_extended	middle	400.5	0.316059
II	73067	73096	73084	+	YBL081W	utr3_extended	middle	69.6667	0.0549783
II	73096	73127	73108	+	YBL081W	utr3_extended	last	701.167	0.553334
II	77461	77478	77467	+	YBL079W	coding_exon	CDS	13.6667	0.00950339
II	77658	77672	77666	+	YBL079W	coding_exon	CDS	27	0.018775
II	78078	78109	78097	+	YBL079W	coding_exon	CDS	47.3333	0.0329142
II	78890	78911	78900	+	YBL079W	coding_exon	CDS	16.25	0.0112998
II	79526	79535	79526	+	YBL079W	coding_exon	CDS	19.3333	0.0134438
II	79556	79578	79567	+	YBL079W	coding_exon	CDS	83.1667	0.0578316
II	79578	79596	79578	+	YBL079W	coding_exon	CDS	27.75	0.0192965
II	79609	79620	79609	+	YBL079W	coding_exon	CDS	18.6667	0.0129802
II	79826	79851	79837	+	YBL079W	utr3	first	1091	0.758649
II	79851	79882	79851	+	YBL079W	utr3	middle	347.083	0.241351
II	79882	79913	79900	+	YBL079W	utr3_extended	middle	43	0.0299009
II	79979	80001	79991	+	YBL079W	utr3_extended	last	14.6667	0.0101988
II	90457	90484	90471	+	YBL071W-A	utr3_extended	first	956	0.899341
II	90484	90506	90486	+	YBL071W-A	utr3_extended	last	107	0.100659
II	90663	90683	90667	+	YBL069W	utr5	utr5	226.5	NA
II	90683	90719	90699	+	YBL069W	utr5	utr5	39	NA
II	91757	91768	91765	+	YBL069W	coding_exon	CDS	29.5	NA
II	92047	92075	92063	+	YBL068W-A	utr3_extended	first	44.0833	0.0218054
II	92075	92098	92086	+	YBL068W-A	utr3_extended	middle	332.667	0.164551
II	92098	92120	92110	+	YBL068W-A	utr3_extended	middle	1166.5	0.576999
II	92163	92190	92176	+	YBL068W-A	utr3_extended	middle	260.917	0.12906
II	92190	92215	92203	+	YBL068W-A	utr3_extended	middle	855.167	0.423001
II	92215	92234	92227	+	YBL068W-A	utr3_extended	middle	11.8333	0.00585326
II	92270	92301	92280	+	YBL068W-A	utr3_extended	last	82.1667	0.040643
II	93471	93493	93482	+	YBL068W	utr3	first	2062.5	0.955598
II	93517	93532	93519	+	YBL068W	utr3	middle	52.9583	0.0245367
II	93575	93591	93577	+	YBL068W	utr3_extended	middle	20.2143	0.00936569
II	93666	93683	93676	+	YBL068W	utr3_extended	last	95.8333	0.0444015
II	103697	103723	103711	+	YBL063W	coding_exon	CDS	15.5	NA
II	104698	104709	104698	+	YBL063W	coding_exon	CDS	22.5	NA
II	104973	104991	104985	+	YBL063W	coding_exon	CDS	35.0667	NA
II	105270	105301	105285	+	YBL063W	utr3_extended	single	14.75	1
II	105301	105326	105316	+	YBL062W	coding_exon	CDS	65.6667	NA
II	105337	105346	105341	+	YBL062W	coding_exon	CDS	17	NA
II	108856	108880	108868	+	YBL060W	coding_exon	CDS	163.667	1.82528
II	108880	108898	108892	+	YBL060W	coding_exon	CDS	12.25	0.136617
II	109937	109971	109955	+	YBL060W	coding_exon	CDS	20.9167	0.233271
II	109986	110017	110002	+	YBL060W	utr3	first	44	0.490706
II	110017	110043	110032	+	YBL060W	utr3_extended	middle	28.0833	0.313197
II	110043	110074	110053	+	YBL060W	utr3_extended	middle	31.3333	0.349442
II	110147	110154	110147	+	YBL060W	utr3_extended	middle	27.5	0.306691
II	110212	110228	110219	+	YBL060W	utr3_extended	last	45.6667	0.509294
II	111227	111247	111236	+	YBL059W	coding_exon	CDS	80.5	0.17152
II	111247	111270	111266	+	YBL059W	utr3_extended	first	24.5	0.0522017
II	111270	111299	111282	+	YBL059W	utr3_extended	last	444.833	0.947798
II	111401	111429	111415	+	YBL058W	utr5	utr5	28.1667	0.0125455
II	111429	111458	111434	+	YBL058W	utr5	utr5	10	0.00445401
II	112318	112352	112337	+	YBL058W	coding_exon	CDS	131.8	0.0587039
II	112352	112385	112355	+	YBL058W	coding_exon	CDS	66.25	0.0295078
II	112466	112497	112485	+	YBL058W	coding_exon	CDS	37.1833	0.0165615
II	112789	112813	112801	+	YBL058W	utr3_extended	first	76.25	0.0339618
II	112813	112839	112824	+	YBL058W	utr3_extended	last	2168.92	0.966038
II	115342	115370	115364	+	YBL056W	utr3	first	117.083	0.0377181
II	115370	115393	115382	+	YBL056W	utr3	middle	1471.5	0.47404
II	115393	115415	115404	+	YBL056W	utr3	middle	460	0.148188
II	115415	115442	115423	+	YBL056W	utr3	middle	153.845	0.0495609
II	115492	115523	115512	+	YBL056W	utr3	middle	31.3333	0.010094
II	115523	115547	115534	+	YBL056W	utr3_extended	middle	61.3333	0.0197584
II	115547	115570	115559	+	YBL056W	utr3_extended	middle	1632.67	0.52596
II	115570	115591	115580	+	YBL056W	utr3_extended	last	87.5	0.0281879
II	118182	118206	118195	+	YBL054W	coding_exon	CDS	97	0.896764
II	118294	118323	118318	+	YBL054W	coding_exon	CDS	25.5833	0.236518
II	118323	118357	118334	+	YBL054W	coding_exon	CDS	39.1667	0.362096
II	118357	118395	118379	+	YBL054W	coding_exon	CDS	27.1667	0.251156
II	119163	119202	119181	+	YBL054W	utr3	first	43	0.397535
II	119202	119234	119223	+	YBL054W	utr3	middle	20.6667	0.191063
II	119282	119302	119285	+	YBL054W	utr3_extended	last	65.1667	0.602465
II	119302	119335	119318	+	YBL053W	utr5	utr5	601.167	NA
II	119335	119366	119352	+	YBL053W	coding_exon	CDS	136.333	NA
II	119366	119390	119379	+	YBL053W	coding_exon	CDS	93	NA
II	119390	119416	119390	+	YBL053W	coding_exon	CDS	26.5	NA
II	125534	125551	125538	+	YBL050W	coding_exon	CDS	34.4	NA
II	126168	126200	126180	+	YBL050W	utr3_extended	single	1538.33	1
II	127490	127515	127507	+	YBL049W	utr3_extended	single	14.6667	1
II	133832	133843	133832	+	YBL046W	utr3_extended	first	26.6	0.176823
II	133919	133944	133933	+	YBL046W	utr3_extended	last	123.833	0.823177
II	136504	136525	136508	+	YBL043W	utr5	utr5	10	NA
II	136525	136555	136542	+	YBL043W	utr5	utr5	10.5	NA
II	136630	136646	136630	+	YBL043W	utr5	utr5	22.1667	NA
II	137689	137697	137692	+	YBL043W	utr3_extended	single	13	1
II	142008	142048	142027	+	YBL041W	utr3	first	2495.5	0.690939
II	142079	142097	142082	+	YBL041W	utr3	middle	151.5	0.0419464
II	142097	142130	142112	+	YBL041W	utr3_extended	last	1116.25	0.309061
II	143320	143343	143332	+	YBL039W-B	utr5	utr5	167.5	0.29853
II	143343	143369	143343	+	YBL039W-B	utr5	utr5	28.5	0.0507946
II	143369	143397	143384	+	YBL039W-B	utr5	utr5	40.3333	0.0718847
II	143654	143675	143664	+	YBL039W-B	utr3	first	26	0.0463389
II	143675	143696	143690	+	YBL039W-B	utr3	middle	110	0.196049
II	143696	143721	143706	+	YBL039W-B	utr3	last	451.083	0.803951
II	146776	146792	146781	+	YBL038W	coding_exon	CDS	55.6667	0.0780009
II	146931	146959	146942	+	YBL038W	utr3_extended	first	375.833	0.526623
II	146959	146987	146976	+	YBL038W	utr3_extended	middle	337.833	0.473377
II	146987	147013	146996	+	YBL038W	utr3_extended	last	46.5	0.0651565
II	147476	147506	147488	+	YBL037W	coding_exon	CDS	54	NA
II	147973	147983	147973	+	YBL037W	coding_exon	CDS	12.5	NA
II	148223	148246	148233	+	YBL037W	coding_exon	CDS	80.1667	NA
II	148474	148479	148474	+	YBL037W	coding_exon	CDS	12.1667	NA
II	148591	148604	148601	+	YBL037W	coding_exon	CDS	12	NA
II	148842	148863	148846	+	YBL037W	coding_exon	CDS	22.3333	NA
II	148878	148893	148881	+	YBL037W	coding_exon	CDS	27.75	NA
II	148893	148914	148904	+	YBL037W	coding_exon	CDS	13	NA
II	149304	149323	149314	+	YBL037W	coding_exon	CDS	18.5	NA
II	149706	149726	149721	+	YBL037W	coding_exon	CDS	64.5	NA
II	150408	150443	150422	+	YBL037W	utr3_extended	single	12.8333	1
II	161500	161520	161508	+	YBL032W	utr3_extended	first	35.9167	0.105819
II	161520	161539	161531	+	YBL032W	utr3_extended	last	303.5	0.894181
II	162723	162752	162741	+	YBL031W	utr3_extended	first	13.7083	0.156709
II	162808	162835	162814	+	YBL031W	utr3_extended	middle	23.3333	0.266739
II	162854	162886	162873	+	YBL031W	utr3_extended	last	64.1429	0.733261
II	166133	166152	166141	+	YBL029W	coding_exon	CDS	65.1667	0.24984
II	166152	166174	166152	+	YBL029W	coding_exon	CDS	38.3333	0.146965
II	166254	166277	166265	+	YBL029W	coding_exon	CDS	25	0.0958466
II	166431	166467	166447	+	YBL029W	coding_exon	CDS	69.3333	0.265815
II	166467	166504	166486	+	YBL029W	coding_exon	CDS	35.8333	0.13738
II	166504	166538	166521	+	YBL029W	coding_exon	CDS	25.5	0.0977636
II	166595	166609	166597	+	YBL029W	coding_exon	CDS	11.6667	0.0447284
II	166609	166633	166620	+	YBL029W	coding_exon	CDS	10.5	0.0402556
II	166780	166789	166785	+	YBL029W	coding_exon	CDS	35.5	0.136102
II	167356	167378	167367	+	YBL029W	utr3	first	128.5	0.492652
II	167441	167471	167453	+	YBL029W	utr3_extended	middle	20.5	0.0785942
II	167471	167504	167488	+	YBL029W	utr3_extended	last	132.333	0.507348
II	169412	169441	169422	+	YBL027W	utr3	first	1231	0.04334
II	169441	169470	169459	+	YBL027W	utr3	middle	18659.9	0.656962
II	169470	169500	169471	+	YBL027W	utr3	middle	9743.42	0.343038
II	169500	169530	169518	+	YBL027W	utr3	last	411.5	0.0144877
II	171152	171174	171163	+	YBL026W	utr3_extended	first	4976.17	0.962244
II	171174	171199	171184	+	YBL026W	utr3_extended	last	195.25	0.0377556
II	172148	172161	172159	+	YBL025W	utr3	first	16.3333	0.0485629
II	172278	172310	172296	+	YBL025W	utr3_extended	middle	10.1	0.0300297
II	172376	172389	172383	+	YBL025W	utr3_extended	last	320	0.951437
II	172466	172491	172479	+	YBL024W	utr5	utr5	317.5	0.242397
II	172491	172520	172502	+	YBL024W	utr5	utr5	69.3333	0.0529329
II	174653	174688	174669	+	YBL024W	utr3	first	250.667	0.191373
II	174688	174720	174707	+	YBL024W	utr3_extended	middle	905.5	0.691309
II	174783	174819	174799	+	YBL024W	utr3_extended	middle	73.5119	0.0561231
II	174819	174856	174855	+	YBL024W	utr3_extended	middle	22.8333	0.0174322
II	174856	174888	174873	+	YBL024W	utr3_extended	middle	404.333	0.308691
II	174888	174916	174888	+	YBL024W	utr3_extended	last	16.0833	0.0122789
II	182585	182614	182597	+	YBL020W	coding_exon	CDS	14	0.0159363
II	183554	183576	183560	+	YBL020W	coding_exon	CDS	77.1667	0.0878391
II	183938	183955	183938	+	YBL020W	coding_exon	CDS	13.3333	0.0151774
II	184167	184179	184174	+	YBL020W	utr3_extended	first	13.4167	0.0152722
II	184179	184202	184190	+	YBL020W	utr3_extended	middle	33	0.037564
II	184202	184223	184214	+	YBL020W	utr3_extended	last	845.5	0.962436
II	186000	186015	186004	+	YBL019W	utr3_extended	first	35	0.04245
II	186015	186037	186026	+	YBL019W	utr3_extended	last	789.5	0.95755
II	192372	192395	192390	+	YBL016W	utr5	utr5	13.1667	0.0172098
II	192841	192850	192848	+	YBL016W	coding_exon	CDS	11.1667	0.0145957
II	193525	193552	193539	+	YBL016W	utr3	first	25.0667	0.032764
II	193552	193572	193558	+	YBL016W	utr3	middle	12.5	0.0163384
II	193631	193657	193646	+	YBL016W	utr3_extended	middle	740	0.967236
II	193657	193682	193661	+	YBL016W	utr3_extended	last	12.1667	0.0159028
II	195791	195819	195810	+	YBL015W	utr3_extended	first	95.6667	0.512043
II	195903	195930	195919	+	YBL015W	utr3_extended	middle	40.6667	0.217663
II	195930	195946	195930	+	YBL015W	utr3_extended	middle	12.8333	0.0686887
II	195946	195963	195961	+	YBL015W	utr3_extended	middle	29.0833	0.155665
II	195963	195985	195973	+	YBL015W	utr3_extended	middle	91.1667	0.487957
II	195985	195998	195985	+	YBL015W	utr3_extended	last	10	0.0535236
II	204654	204682	204661	+	YBL011W	coding_exon	CDS	51	0.0348599
II	204728	204758	204742	+	YBL011W	coding_exon	CDS	33.65	0.0230007
II	204758	204787	204774	+	YBL011W	coding_exon	CDS	82	0.0560492
II	205068	205107	205086	+	YBL011W	coding_exon	CDS	33.1833	0.0226817
II	205107	205131	205127	+	YBL011W	coding_exon	CDS	28	0.0191388
II	205174	205196	205178	+	YBL011W	coding_exon	CDS	38.5	0.0263158
II	205874	205911	205894	+	YBL011W	utr3_extended	first	252.917	0.172875
II	205911	205941	205927	+	YBL011W	utr3_extended	middle	656.167	0.448508
II	205941	205975	205955	+	YBL011W	utr3_extended	middle	806.833	0.551492
II	205975	206007	205995	+	YBL011W	utr3_extended	middle	38.7857	0.0265111
II	206007	206032	206018	+	YBL011W	utr3_extended	middle	512	0.349966
II	206032	206057	206045	+	YBL011W	utr3_extended	middle	96.5	0.0659604
II	206057	206085	206068	+	YBL011W	utr3_extended	last	211.5	0.144566
II	208787	208819	208806	+	YBL009W	coding_exon	CDS	24.5833	NA
II	208832	208845	208832	+	YBL009W	coding_exon	CDS	13.5	NA
II	209316	209338	209337	+	YBL008W-A	utr5	utr5	14.5833	NA
II	209338	209360	209349	+	YBL008W-A	utr5	utr5	436.833	NA
II	209360	209378	209362	+	YBL008W-A	utr5	utr5	14.75	NA
II	211870	211901	211885	+	YBL008W	coding_exon	CDS	136.267	0.347915
II	211990	212016	212005	+	YBL008W	coding_exon	CDS	25	0.0638298
II	212187	212208	212197	+	YBL008W	utr3_extended	first	103.833	0.265106
II	212208	212221	212209	+	YBL008W	utr3_extended	middle	29.6667	0.0757447
II	212245	212267	212255	+	YBL008W	utr3_extended	middle	287.833	0.734894
II	212267	212291	212278	+	YBL008W	utr3_extended	middle	33.75	0.0861702
II	212417	212435	212419	+	YBL008W	utr3_extended	middle	21.6667	0.0553191
II	212462	212477	212472	+	YBL008W	utr3_extended	last	22.6667	0.0578723
II	217440	217460	217443	+	YBL005W	utr5	utr5	14.1667	0.0201422
II	218249	218276	218262	+	YBL005W	coding_exon	CDS	18.0333	0.0256398
II	218290	218313	218301	+	YBL005W	coding_exon	CDS	13.5	0.0191943
II	218538	218568	218550	+	YBL005W	coding_exon	CDS	79.1333	0.112512
II	218631	218645	218642	+	YBL005W	coding_exon	CDS	34.8333	0.0495261
II	218662	218678	218667	+	YBL005W	coding_exon	CDS	10	0.014218
II	219074	219095	219089	+	YBL005W	coding_exon	CDS	16.4	0.0233175
II	219819	219843	219836	+	YBL005W	coding_exon	CDS	17.2667	0.0245498
II	219957	219981	219966	+	YBL005W	coding_exon	CDS	15	0.021327
II	219981	220007	219996	+	YBL005W	coding_exon	CDS	22.6667	0.0322275
II	220007	220031	220007	+	YBL005W	coding_exon	CDS	19.5	0.0277251
II	220045	220060	220059	+	YBL005W	coding_exon	CDS	35	0.049763
II	220060	220084	220070	+	YBL005W	coding_exon	CDS	157.5	0.223934
II	220084	220111	220084	+	YBL005W	coding_exon	CDS	141.5	0.201185
II	220375	220403	220395	+	YBL005W	coding_exon	CDS	26.2	0.0372512
II	220535	220571	220551	+	YBL005W	utr3_extended	first	13.25	0.0188389
II	220668	220695	220684	+	YBL005W	utr3_extended	middle	525.167	0.746682
II	220755	220767	220764	+	YBL005W	utr3_extended	middle	15	0.021327
II	220767	220786	220778	+	YBL005W	utr3_extended	middle	42	0.0597156
II	220797	220816	220811	+	YBL005W	utr3_extended	middle	11.75	0.0167062
II	220816	220834	220827	+	YBL005W	utr3_extended	middle	178.167	0.253318
II	220845	220858	220856	+	YBL005W	utr3_extended	last	20	0.028436
II	227903	227922	227916	+	YBL004W	coding_exon	CDS	12.1667	0.0662776
II	228558	228572	228561	+	YBL004W	coding_exon	CDS	20	0.108949
II	228788	228820	228809	+	YBL004W	coding_exon	CDS	13	0.0708171
II	229642	229664	229660	+	YBL004W	coding_exon	CDS	17	0.092607
II	230290	230309	230306	+	YBL004W	coding_exon	CDS	11.1667	0.0608301
II	230309	230331	230321	+	YBL004W	coding_exon	CDS	287.333	1.56524
II	230670	230698	230688	+	YBL004W	coding_exon	CDS	43.75	0.238327
II	230847	230868	230867	+	YBL004W	coding_exon	CDS	27	0.147082
II	230909	230926	230909	+	YBL004W	coding_exon	CDS	13.6	0.0740856
II	230926	230954	230942	+	YBL004W	coding_exon	CDS	10.2667	0.0559274
II	231927	231940	231931	+	YBL004W	coding_exon	CDS	16.6667	0.0907912
II	232764	232778	232767	+	YBL004W	coding_exon	CDS	33.5	0.18249
II	232778	232803	232782	+	YBL004W	coding_exon	CDS	10.6333	0.0579248
II	232803	232834	232818	+	YBL004W	coding_exon	CDS	76.9667	0.419274
II	233498	233527	233513	+	YBL004W	coding_exon	CDS	83.5	0.454864
II	233562	233584	233566	+	YBL004W	coding_exon	CDS	20.5	0.111673
II	234097	234125	234117	+	YBL004W	coding_exon	CDS	10.5	0.0571984
II	234826	234850	234838	+	YBL004W	coding_exon	CDS	10.6667	0.0581064
II	235152	235184	235166	+	YBL004W	utr3_extended	first	139.321	0.758949
II	235184	235216	235201	+	YBL004W	utr3_extended	middle	28.3833	0.154617
II	235216	235246	235231	+	YBL004W	utr3_extended	last	44.25	0.241051
II	236383	236409	236385	+	YBL002W	utr5	utr5	66	0.0213041
II	236596	236632	236614	+	YBL002W	coding_exon	CDS	18.25	0.0058909
II	236965	236997	236977	+	YBL002W	utr3	first	842.167	0.271842
II	237033	237063	237048	+	YBL002W	utr3	middle	156.167	0.0504089
II	237063	237097	237078	+	YBL002W	utr3	middle	1499.5	0.484022
II	237097	237127	237121	+	YBL002W	utr3_extended	middle	108.5	0.0350226
II	237127	237149	237138	+	YBL002W	utr3_extended	middle	1598.5	0.515978
II	237149	237176	237159	+	YBL002W	utr3_extended	middle	68.5333	0.0221218
II	237176	237204	237193	+	YBL002W	utr3_extended	last	112.833	0.0364213
II	243773	243798	243788	+	YBR003W	coding_exon	CDS	199.867	NA
II	244216	244246	244235	+	YBR003W	utr3	single	12.4167	1
II	246635	246662	246651	+	YBR005W	utr3_extended	first	217	0.151202
II	246662	246685	246662	+	YBR005W	utr3_extended	middle	95.8333	0.0667751
II	246685	246714	246697	+	YBR005W	utr3_extended	middle	921.667	0.642202
II	246714	246742	246730	+	YBR005W	utr3_extended	middle	513.5	0.357798
II	246742	246775	246754	+	YBR005W	utr3_extended	last	38.3333	0.02671
II	247864	247870	247868	+	YBR006W	coding_exon	CDS	13.5	0.0337416
II	248577	248609	248596	+	YBR006W	utr3_extended	first	20.4167	0.0510289
II	248609	248633	248622	+	YBR006W	utr3_extended	middle	42.2667	0.10564
II	248633	248658	248644	+	YBR006W	utr3_extended	last	357.833	0.89436
II	256813	256834	256823	+	YBR010W	utr3	first	708.333	0.122747
II	256834	256856	256844	+	YBR010W	utr3	middle	1221.5	0.211673
II	256856	256885	256867	+	YBR010W	utr3_extended	middle	1272.2	0.220459
II	256885	256920	256903	+	YBR010W	utr3_extended	middle	4498.5	0.779541
II	256920	256947	256936	+	YBR010W	utr3_extended	last	192.643	0.0333829
II	270812	270826	270824	+	YBR016W	utr3_extended	first	66.8333	0.0271349
II	270826	270851	270839	+	YBR016W	utr3_extended	middle	2254.5	0.915347
II	270851	270870	270863	+	YBR016W	utr3_extended	middle	208.5	0.0846529
II	270904	270936	270917	+	YBR016W	utr3_extended	middle	46.4722	0.0188681
II	270936	270967	270955	+	YBR016W	utr3_extended	last	31.8889	0.0129472
II	278897	278914	278910	+	YBR020W	utr5	utr5	13.3333	0.27027
II	278914	278944	278925	+	YBR020W	utr5	utr5	68.5	1.38851
II	279006	279044	279025	+	YBR020W	coding_exon	CDS	14.9405	0.302847
II	280620	280641	280623	+	YBR020W	utr3	first	37.3333	0.756757
II	280641	280664	280659	+	YBR020W	utr3_extended	middle	12	0.243243
II	280749	280783	280762	+	YBR020W	utr3_extended	last	10.5	0.212838
II	282270	282281	282276	+	YBR021W	coding_exon	CDS	34	0.0382309
II	282644	282659	282650	+	YBR021W	coding_exon	CDS	80.3333	0.0903298
II	282723	282746	282739	+	YBR021W	coding_exon	CDS	16.6667	0.0187406
II	283390	283410	283398	+	YBR021W	utr3_extended	first	15.25	0.0171477
II	283426	283450	283429	+	YBR021W	utr3_extended	middle	77	0.0865817
II	283450	283488	283470	+	YBR021W	utr3_extended	middle	480	0.53973
II	283488	283518	283506	+	YBR021W	utr3_extended	middle	409.333	0.46027
II	283518	283548	283525	+	YBR021W	utr3_extended	last	204	0.229385
II	284316	284333	284320	+	YBR022W	utr3	first	32.3333	0.0503047
II	284333	284365	284346	+	YBR022W	utr3	middle	77.8833	0.121172
II	284365	284395	284383	+	YBR022W	utr3	middle	84.9167	0.132115
II	284395	284418	284395	+	YBR022W	utr3	middle	79.8333	0.124206
II	284418	284439	284428	+	YBR022W	utr3_extended	last	557.833	0.867885
II	290551	290583	290565	+	YBR024W	utr3_extended	single	514.5	1
II	299965	299992	299979	+	YBR030W	utr3_extended	first	127.167	0.701932
II	299992	300016	300005	+	YBR030W	utr3_extended	last	54	0.298068
II	301330	301353	301341	+	YBR031W	utr3	first	34460	0.799954
II	301353	301376	301365	+	YBR031W	utr3	last	8617.5	0.200046
II	301492	301505	301503	+	YBR032W	utr5	utr5	14	NA
II	304781	304796	304785	+	YBR033W	utr3	first	20.8333	0.523013
II	305019	305032	305019	+	YBR033W	utr3_extended	middle	19	0.476987
II	305316	305333	305326	+	YBR033W	utr3_extended	last	11	0.276151
II	313492	313513	313511	+	YBR038W	coding_exon	CDS	18.5	0.0191066
II	313880	313888	313880	+	YBR038W	coding_exon	CDS	10	0.0103279
II	313912	313948	313929	+	YBR038W	coding_exon	CDS	26	0.0268526
II	314028	314049	314047	+	YBR038W	coding_exon	CDS	20.5	0.0211722
II	314067	314095	314087	+	YBR038W	coding_exon	CDS	42	0.0433772
II	314539	314562	314541	+	YBR038W	coding_exon	CDS	12.9167	0.0133402
II	314936	314963	314952	+	YBR038W	utr3_extended	first	123.75	0.127808
II	314963	314985	314974	+	YBR038W	utr3_extended	middle	844.5	0.872192
II	314985	315001	314985	+	YBR038W	utr3_extended	last	24.6	0.0254067
II	316575	316600	316583	+	YBR039W	utr3	first	17.8333	0.0271113
II	316651	316675	316662	+	YBR039W	utr3	middle	22	0.0334457
II	316675	316708	316687	+	YBR039W	utr3_extended	last	635.783	0.966554
II	319345	319359	319354	+	YBR041W	coding_exon	CDS	25.9	0.20659
II	319359	319382	319372	+	YBR041W	coding_exon	CDS	133.5	1.06486
II	320359	320378	320370	+	YBR041W	utr3_extended	first	38.75	0.309087
II	320398	320428	320410	+	YBR041W	utr3_extended	middle	48.5357	0.387143
II	320428	320457	320445	+	YBR041W	utr3_extended	middle	21.9167	0.174817
II	320457	320481	320469	+	YBR041W	utr3_extended	last	76.8333	0.612857
II	332449	332471	332460	+	YBR047W	utr3_extended	first	339	0.665141
II	332471	332495	332478	+	YBR047W	utr3_extended	last	170.667	0.334859
II	333977	334006	333999	+	YBR048W	utr3_extended	first	549.833	0.0355868
II	334006	334037	334036	+	YBR048W	utr3_extended	middle	6200.25	0.401298
II	334037	334071	334054	+	YBR048W	utr3_extended	last	9250.25	0.598702
II	338788	338817	338803	+	YBR051W	utr3_extended	single	14.25	1
II	342795	342817	342806	+	YBR054W	utr5	utr5	19.1667	0.0892857
II	342817	342841	342828	+	YBR054W	utr5	utr5	19.9167	0.0927795
II	342841	342867	342854	+	YBR054W	utr5	utr5	18.8333	0.0877329
II	342867	342893	342880	+	YBR054W	utr5	utr5	10.6667	0.0496894
II	343049	343076	343059	+	YBR054W	utr5	utr5	46.4167	0.216227
II	344375	344409	344390	+	YBR054W	utr3	first	109.5	0.510093
II	344466	344484	344482	+	YBR054W	utr3_extended	middle	10.6667	0.0496894
II	344484	344511	344495	+	YBR054W	utr3_extended	middle	105.167	0.489907
II	344592	344613	344602	+	YBR054W	utr3_extended	middle	95	0.442547
II	344613	344635	344613	+	YBR054W	utr3_extended	middle	15.2667	0.071118
II	344635	344657	344646	+	YBR054W	utr3_extended	middle	100	0.465839
II	344657	344680	344667	+	YBR054W	utr3_extended	last	13	0.060559
II	349410	349434	349423	+	YBR056W	utr3	first	6836.5	0.963892
II	349434	349458	349436	+	YBR056W	utr3	middle	256.1	0.0361081
II	349471	349490	349478	+	YBR056W	utr3_extended	last	34.1667	0.00481723
II	351513	351543	351525	+	YBR056W-A	utr3_extended	first	16.5	0.610358
II	351543	351573	351561	+	YBR056W-A	utr3_extended	last	10.5333	0.389642
II	381281	381301	381286	+	YBR071W	utr3	first	21.5	0.0113277
II	381301	381330	381315	+	YBR071W	utr3_extended	middle	1876.5	0.988672
II	381506	381532	381520	+	YBR071W	utr3_extended	last	15	0.00790306
II	382828	382851	382839	+	YBR072W	utr3_extended	single	530	1
II	384716	384733	384720	+	YBR073W	coding_exon	CDS	25.3333	0.014968
II	385493	385507	385496	+	YBR073W	coding_exon	CDS	18.7	0.0110487
II	385507	385529	385518	+	YBR073W	coding_exon	CDS	25.3333	0.014968
II	386028	386039	386036	+	YBR073W	utr3_extended	first	32.6667	0.0193008
II	386039	386060	386049	+	YBR073W	utr3_extended	middle	968	0.571935
II	386060	386081	386069	+	YBR073W	utr3_extended	middle	724.5	0.428065
II	386104	386127	386117	+	YBR073W	utr3_extended	middle	23.6667	0.0139833
II	386127	386148	386137	+	YBR073W	utr3_extended	last	30.3333	0.0179222
II	387541	387568	387558	+	YBR074W	coding_exon	CDS	14.8333	0.0184781
II	387607	387636	387625	+	YBR074W	coding_exon	CDS	53.1667	0.0662307
II	387636	387666	387646	+	YBR074W	coding_exon	CDS	180.867	0.225309
II	387761	387783	387778	+	YBR074W	coding_exon	CDS	41	0.0510744
II	388576	388592	388580	+	YBR074W	coding_exon	CDS	14.6667	0.0182705
II	388592	388616	388603	+	YBR074W	coding_exon	CDS	98.8333	0.123118
II	388616	388641	388628	+	YBR074W	coding_exon	CDS	49.1667	0.0612478
II	388641	388666	388653	+	YBR074W	coding_exon	CDS	34.3333	0.0427696
II	389235	389264	389261	+	YBR074W	utr3	first	337.5	0.42043
II	389264	389292	389277	+	YBR074W	utr3	middle	465.25	0.57957
II	389292	389319	389294	+	YBR074W	utr3	middle	291.924	0.363655
II	389319	389349	389330	+	YBR074W	utr3	last	126.09	0.157073
II	391673	391696	391687	+	YBR076W	utr3_extended	single	14	1
II	394761	394780	394772	+	YBR078W	utr3	first	486.667	0.0445799
II	394857	394882	394874	+	YBR078W	utr3	middle	1028.4	0.094204
II	394882	394906	394893	+	YBR078W	utr3_extended	middle	5798.5	0.531157
II	394906	394935	394919	+	YBR078W	utr3_extended	middle	468.833	0.0429463
II	394963	394987	394976	+	YBR078W	utr3_extended	middle	316.5	0.0289922
II	395084	395107	395096	+	YBR078W	utr3_extended	middle	143.75	0.0131679
II	395107	395136	395117	+	YBR078W	utr3_extended	middle	256.083	0.0234579
II	395207	395232	395229	+	YBR078W	utr3_extended	middle	971.817	0.0890208
II	395232	395259	395247	+	YBR078W	utr3_extended	middle	5118.23	0.468843
II	395259	395277	395259	+	YBR078W	utr3_extended	last	347.5	0.0318319
II	409133	409154	409143	+	YBR083W	utr5	utr5	54.3333	0.0225645
II	409250	409286	409270	+	YBR083W	coding_exon	CDS	67.5	0.0280325
II	410659	410691	410679	+	YBR083W	utr3_extended	first	356.167	0.147915
II	410691	410716	410703	+	YBR083W	utr3_extended	middle	1910.5	0.793424
II	410716	410739	410717	+	YBR083W	utr3_extended	middle	497.417	0.206576
II	410739	410767	410750	+	YBR083W	utr3_extended	middle	211.317	0.0877591
II	410767	410794	410783	+	YBR083W	utr3_extended	last	104.333	0.0433293
II	414057	414082	414070	+	YBR084W	utr3_extended	first	1438	0.923967
II	414082	414099	414085	+	YBR084W	utr3_extended	middle	92	0.0591133
II	414130	414147	414141	+	YBR084W	utr3_extended	last	118.333	0.0760334
II	417010	417030	417023	+	YBR085W	utr3	first	47	0.124503
II	417066	417098	417081	+	YBR085W	utr3	middle	330.5	0.875497
II	417098	417118	417098	+	YBR085W	utr3_extended	middle	12.6667	0.0335541
II	417144	417162	417151	+	YBR085W	utr3_extended	middle	26	0.0688742
II	417162	417173	417162	+	YBR085W	utr3_extended	last	10	0.0264901
II	424667	424691	424680	+	YBR087W	coding_exon	CDS	11.6667	0.00587988
II	424863	424890	424878	+	YBR087W	utr3_extended	first	1602.17	0.807476
II	424890	424912	424895	+	YBR087W	utr3_extended	middle	382	0.192524
II	424933	424953	424943	+	YBR087W	utr3_extended	last	21	0.0105838
II	432322	432342	432322	+	YBR094W	coding_exon	CDS	11.5833	0.018106
II	432710	432726	432713	+	YBR094W	coding_exon	CDS	21	0.0328253
II	433231	433249	433238	+	YBR094W	coding_exon	CDS	14.4167	0.0225348
II	433294	433306	433297	+	YBR094W	coding_exon	CDS	77	0.12036
II	434036	434063	434046	+	YBR094W	coding_exon	CDS	15.8333	0.0247493
II	434372	434389	434382	+	YBR094W	utr3_extended	first	162.75	0.254396
II	434389	434413	434401	+	YBR094W	utr3_extended	last	477	0.745604
II	436777	436801	436790	+	YBR096W	utr3	single	12026.5	1
II	437728	437750	437739	+	YBR097W	coding_exon	CDS	11.8333	0.0855422
II	438348	438353	438348	+	YBR097W	coding_exon	CDS	10.5	0.0759036
II	440854	440868	440857	+	YBR097W	coding_exon	CDS	11.3333	0.0819277
II	441367	441399	441386	+	YBR097W	utr3	first	83.75	0.605422
II	441472	441494	441481	+	YBR097W	utr3	middle	38.6667	0.279518
II	441494	441515	441507	+	YBR097W	utr3	middle	13.25	0.0957831
II	441529	441543	441529	+	YBR097W	utr3	middle	11	0.0795181
II	443650	443679	443662	+	YBR097W	utr3_extended	middle	18	0.13012
II	443730	443751	443747	+	YBR097W	utr3_extended	middle	28.6833	0.207349
II	443765	443776	443767	+	YBR097W	utr3_extended	middle	30.75	0.222289
II	443856	443891	443871	+	YBR097W	utr3_extended	middle	38	0.274699
II	443891	443928	443910	+	YBR097W	utr3_extended	last	54.5833	0.394578
II	449348	449384	449363	+	YBR103W	utr3_extended	single	1780.7	1
II	449550	449580	449559	+	YBR104W	utr5	utr5	12.1667	0.0113038
II	450499	450529	450518	+	YBR104W	coding_exon	CDS	73.5	0.0682874
II	450529	450549	450534	+	YBR104W	coding_exon	CDS	17.2333	0.0160111
II	450607	450635	450623	+	YBR104W	coding_exon	CDS	21.5	0.0199752
II	450703	450727	450715	+	YBR104W	utr3	first	71.15	0.0661041
II	450727	450751	450739	+	YBR104W	utr3_extended	middle	674.5	0.626665
II	450751	450776	450763	+	YBR104W	utr3_extended	middle	217.5	0.202075
II	450776	450799	450788	+	YBR104W	utr3_extended	middle	401.833	0.373335
II	451124	451137	451124	+	YBR104W	utr3_extended	last	11	0.0102199
II	453276	453300	453289	+	YBR106W	utr3_extended	first	482.5	0.0624057
II	453325	453352	453345	+	YBR106W	utr3_extended	middle	100	0.0129338
II	453352	453379	453363	+	YBR106W	utr3_extended	last	7249.17	0.937594
II	454764	454785	454764	+	YBR108W	utr5	utr5	205.333	0.918033
II	454808	454820	454819	+	YBR108W	utr5	utr5	10	0.0447094
II	457690	457714	457706	+	YBR108W	utr3	first	13.4167	0.0599851
II	457714	457726	457722	+	YBR108W	utr3	middle	10.25	0.0458271
II	457740	457751	457740	+	YBR108W	utr3	middle	12.5	0.0558867
II	457798	457817	457816	+	YBR108W	utr3	middle	73.5	0.328614
II	457828	457864	457845	+	YBR108W	utr3	middle	137.167	0.613264
II	457864	457888	457883	+	YBR108W	utr3_extended	last	86.5	0.386736
II	460303	460328	460317	+	YBR110W	utr3_extended	first	610.667	0.646208
II	460328	460349	460328	+	YBR110W	utr3_extended	last	334.333	0.353792
II	462679	462706	462697	+	YBR111W-A	utr3	first	76.3333	0.27978
II	462741	462769	462757	+	YBR111W-A	utr3	last	196.5	0.72022
II	467258	467286	467269	+	YBR114W	coding_exon	CDS	27.3333	0.00609371
II	468551	468566	468556	+	YBR114W	coding_exon	CDS	38.3333	0.00854606
II	469625	469655	469636	+	YBR114W	utr3	first	24.5	0.00546204
II	469655	469685	469673	+	YBR114W	utr3	middle	316.533	0.0705681
II	469685	469707	469696	+	YBR114W	utr3_extended	middle	2566.67	0.572214
II	469707	469737	469716	+	YBR114W	utr3_extended	middle	1918.83	0.427786
II	469737	469771	469757	+	YBR114W	utr3_extended	middle	121.333	0.0270501
II	469771	469797	469784	+	YBR114W	utr3_extended	last	40.8333	0.00910341
II	479078	479110	479090	+	YBR118W	utr3	first	1181.17	0.0480699
II	479110	479141	479130	+	YBR118W	utr3	middle	13691.3	0.557196
II	479141	479163	479147	+	YBR118W	utr3	last	10880.5	0.442804
II	480408	480422	480416	+	YBR119W	utr3_extended	first	10.4	0.0363976
II	480422	480451	480435	+	YBR119W	utr3_extended	middle	109.15	0.382
II	480451	480477	480466	+	YBR119W	utr3_extended	middle	176.583	0.618
II	480477	480496	480485	+	YBR119W	utr3_extended	last	32.8333	0.114909
II	491160	491186	491171	+	YBR126W-A	utr3_extended	first	55.2857	0.0963877
II	491186	491214	491200	+	YBR126W-A	utr3_extended	middle	472.286	0.823405
II	491214	491240	491214	+	YBR126W-A	utr3_extended	middle	101.291	0.176595
II	491240	491269	491252	+	YBR126W-A	utr3_extended	middle	21.8333	0.0380652
II	491269	491301	491285	+	YBR126W-A	utr3_extended	middle	10	0.0174345
II	491469	491492	491486	+	YBR126W-A	utr3_extended	last	10.5	0.0183062
II	499345	499373	499350	+	YBR131W	utr3	single	10.7242	1
II	505396	505411	505407	+	YBR135W	utr3	first	56.8333	0.563636
II	505482	505507	505496	+	YBR135W	utr3_extended	middle	43.0833	0.427273
II	505507	505528	505516	+	YBR135W	utr3_extended	middle	44	0.436364
II	505528	505549	505538	+	YBR135W	utr3_extended	middle	12.5667	0.124628
II	505549	505574	505551	+	YBR135W	utr3_extended	last	19.875	0.197107
II	508636	508655	508654	+	YBR136W	coding_exon	CDS	12.75	0.0228079
II	508655	508685	508667	+	YBR136W	coding_exon	CDS	16.1	0.0288006
II	508685	508709	508702	+	YBR136W	coding_exon	CDS	22.1	0.0395337
II	508892	508915	508906	+	YBR136W	coding_exon	CDS	12.75	0.0228079
II	511967	511978	511972	+	YBR136W	coding_exon	CDS	23	0.0411437
II	512379	512395	512393	+	YBR136W	coding_exon	CDS	21.25	0.0380132
II	512955	512984	512969	+	YBR136W	utr3	first	518.433	0.927402
II	512984	513010	512985	+	YBR136W	utr3	last	40.5833	0.0725977
II	513663	513690	513679	+	YBR137W	utr3	first	458.667	0.572379
II	513715	513743	513729	+	YBR137W	utr3	middle	342.667	0.427621
II	513789	513816	513800	+	YBR137W	utr3_extended	middle	55.5	0.0692596
II	513816	513846	513831	+	YBR137W	utr3_extended	last	30.6667	0.0382696
II	517198	517226	517215	+	YBR139W	utr3	first	88.5	0.064663
II	517268	517293	517279	+	YBR139W	utr3	middle	64.9833	0.0474805
II	517319	517351	517331	+	YBR139W	utr3	middle	100.967	0.0737719
II	517351	517386	517370	+	YBR139W	utr3	middle	1267.67	0.926228
II	517386	517415	517386	+	YBR139W	utr3_extended	middle	66.6667	0.0487104
II	517415	517439	517428	+	YBR139W	utr3_extended	middle	58.1667	0.0424998
II	517439	517462	517442	+	YBR139W	utr3_extended	middle	14.8333	0.0108381
II	517499	517504	517499	+	YBR139W	utr3_extended	middle	15.8	0.0115444
II	517516	517526	517516	+	YBR139W	utr3_extended	last	11.75	0.00858521
II	527315	527326	527315	+	YBR141W-A	utr3_extended	first	10.5	0.0200318
II	527672	527694	527687	+	YBR141W-A	utr3_extended	middle	14.5	0.027663
II	527694	527724	527722	+	YBR141W-A	utr3_extended	middle	146.833	0.280127
II	527724	527753	527741	+	YBR141W-A	utr3_extended	middle	377.333	0.719873
II	527753	527778	527755	+	YBR141W-A	utr3_extended	last	78.8333	0.150397
II	529788	529815	529806	+	YBR142W	coding_exon	CDS	25.9	0.0250399
II	529959	529988	529968	+	YBR142W	coding_exon	CDS	61.5	0.0594576
II	530462	530489	530476	+	YBR142W	coding_exon	CDS	17.6667	0.01708
II	530515	530537	530529	+	YBR142W	coding_exon	CDS	19.1667	0.0185302
II	530702	530739	530721	+	YBR142W	utr3_extended	first	92.9167	0.089831
II	530739	530768	530757	+	YBR142W	utr3_extended	middle	780.233	0.754322
II	530792	530816	530805	+	YBR142W	utr3_extended	middle	254.117	0.245678
II	530816	530839	530822	+	YBR142W	utr3_extended	middle	132.75	0.128341
II	530839	530855	530842	+	YBR142W	utr3_extended	middle	24	0.023203
II	530881	530910	530894	+	YBR142W	utr3_extended	last	35.8333	0.0346433
II	534828	534842	534828	+	YBR145W	utr3	first	12.5	0.0408163
II	534842	534874	534855	+	YBR145W	utr3_extended	middle	63.6667	0.207891
II	534874	534905	534899	+	YBR145W	utr3_extended	middle	66.6667	0.217687
II	534905	534937	534916	+	YBR145W	utr3_extended	middle	239.583	0.782313
II	534958	534976	534962	+	YBR145W	utr3_extended	middle	64.6667	0.211156
II	534976	535001	534990	+	YBR145W	utr3_extended	middle	48.5	0.158367
II	535016	535027	535016	+	YBR145W	utr3_extended	last	20.1667	0.0658503
II	535613	535624	535618	+	YBR146W	coding_exon	CDS	10.8333	0.0102686
II	536202	536217	536214	+	YBR146W	utr3	first	17.1667	0.0162717
II	536217	536244	536228	+	YBR146W	utr3	middle	33.25	0.0315166
II	536257	536270	536264	+	YBR146W	utr3_extended	middle	12.5	0.0118483
II	536270	536300	536283	+	YBR146W	utr3_extended	middle	859	0.814218
II	536300	536324	536317	+	YBR146W	utr3_extended	last	196	0.185782
II	536484	536497	536486	+	YBR147W	utr5	utr5	14.75	NA
II	536497	536512	536505	+	YBR147W	utr5	utr5	14	NA
II	537466	537495	537480	+	YBR147W	utr3	single	23.1	1
II	537882	537896	537885	+	YBR148W	coding_exon	CDS	22.5	NA
II	539785	539824	539805	+	YBR148W	utr3	single	76.7833	1
II	541109	541133	541122	+	YBR149W	utr3	first	4077.83	0.82071
II	541188	541214	541203	+	YBR149W	utr3_extended	middle	890.833	0.17929
II	541214	541238	541225	+	YBR149W	utr3_extended	middle	834.333	0.167919
II	541238	541261	541238	+	YBR149W	utr3_extended	middle	128.55	0.0258721
II	541261	541283	541271	+	YBR149W	utr3_extended	last	31.9167	0.00642359
II	546066	546091	546074	+	YBR151W	utr3	first	74.6667	0.145691
II	546091	546118	546107	+	YBR151W	utr3_extended	middle	260.5	0.508293
II	546164	546193	546182	+	YBR151W	utr3_extended	middle	65.5	0.127805
II	546193	546210	546204	+	YBR151W	utr3_extended	middle	252	0.491707
II	546290	546299	546292	+	YBR151W	utr3_extended	last	11.75	0.0229268
II	548252	548276	548265	+	YBR153W	utr3	first	283.75	0.180054
II	548276	548306	548286	+	YBR153W	utr3	middle	18.5	0.0117392
II	548306	548344	548326	+	YBR153W	utr3	middle	37.25	0.023637
II	548344	548386	548362	+	YBR153W	utr3	middle	112.75	0.0715457
II	548386	548425	548410	+	YBR153W	utr3_extended	middle	1292.17	0.819946
II	548425	548442	548425	+	YBR153W	utr3_extended	last	23.3333	0.0148062
II	550969	550993	550981	+	YBR155W	utr3	first	54.35	0.133265
II	550993	551017	550995	+	YBR155W	utr3	middle	44.2667	0.108541
II	551017	551044	551039	+	YBR155W	utr3	middle	34	0.0833674
II	551044	551071	551065	+	YBR155W	utr3	middle	89.5	0.219452
II	551071	551102	551083	+	YBR155W	utr3_extended	last	318.333	0.780548
II	556271	556307	556291	+	YBR158W	utr5	utr5	244.75	0.123632
II	556307	556335	556323	+	YBR158W	utr5	utr5	57.7667	0.02918
II	556335	556358	556346	+	YBR158W	utr5	utr5	86.8333	0.0438626
II	556358	556380	556369	+	YBR158W	utr5	utr5	831.5	0.42002
II	556380	556405	556385	+	YBR158W	utr5	utr5	115	0.0580906
II	556405	556441	556420	+	YBR158W	utr5	utr5	45.8333	0.023152
II	556970	556995	556983	+	YBR158W	coding_exon	CDS	22.5	0.0113655
II	557431	557463	557445	+	YBR158W	coding_exon	CDS	29.25	0.0147752
II	557463	557493	557481	+	YBR158W	coding_exon	CDS	94.5167	0.0477437
II	557493	557519	557505	+	YBR158W	coding_exon	CDS	273	0.137902
II	557733	557758	557749	+	YBR158W	coding_exon	CDS	48.75	0.0246254
II	558069	558091	558080	+	YBR158W	coding_exon	CDS	58.1667	0.0293821
II	558278	558308	558294	+	YBR158W	utr3	first	105.417	0.0532497
II	558308	558335	558328	+	YBR158W	utr3	middle	119.667	0.0604479
II	558335	558361	558347	+	YBR158W	utr3	middle	1860	0.939552
II	558361	558386	558382	+	YBR158W	utr3_extended	middle	25.3333	0.0127968
II	558386	558409	558398	+	YBR158W	utr3_extended	middle	86.6333	0.0437616
II	558409	558435	558420	+	YBR158W	utr3_extended	last	38.6	0.0194982
II	559805	559832	559812	+	YBR159W	utr3	first	113.333	0.707412
II	559850	559866	559850	+	YBR159W	utr3_extended	middle	21.8333	0.136281
II	559866	559901	559881	+	YBR159W	utr3_extended	last	46.875	0.292588
II	560996	561010	560996	+	YBR160W	utr3_extended	first	11.75	0.0249293
II	561010	561030	561024	+	YBR160W	utr3_extended	middle	16.5	0.0350071
II	561050	561080	561067	+	YBR160W	utr3_extended	middle	420.667	0.892504
II	561080	561106	561104	+	YBR160W	utr3_extended	middle	36.8	0.0780764
II	561106	561129	561118	+	YBR160W	utr3_extended	last	50.6667	0.107496
II	562378	562399	562387	+	YBR161W	coding_exon	CDS	26.1667	0.0721424
II	562424	562438	562430	+	YBR161W	coding_exon	CDS	21.4333	0.0590925
II	562546	562578	562560	+	YBR161W	coding_exon	CDS	13.5	0.03722
II	562855	562886	562875	+	YBR161W	utr3_extended	first	273.167	0.75313
II	562886	562911	562886	+	YBR161W	utr3_extended	middle	89.5417	0.24687
II	562995	563025	563009	+	YBR161W	utr3_extended	last	13.75	0.0379092
II	565489	565512	565499	+	YBR162W-A	utr3	first	3872.33	0.245092
II	565512	565536	565525	+	YBR162W-A	utr3	middle	11927.2	0.754908
II	565536	565558	565537	+	YBR162W-A	utr3	last	1108.21	0.0701424
II	565582	565614	565594	+	YBR163W	utr5	utr5	108.833	0.101342
II	565678	565689	565686	+	YBR163W	utr5	utr5	15.3333	0.014278
II	565807	565821	565819	+	YBR163W	coding_exon	CDS	10.1667	0.0094669
II	567506	567521	567510	+	YBR163W	utr3_extended	first	29.7	0.0276558
II	567521	567550	567532	+	YBR163W	utr3_extended	middle	776.833	0.723365
II	567550	567578	567567	+	YBR163W	utr3_extended	middle	297.083	0.276635
II	567578	567606	567580	+	YBR163W	utr3_extended	middle	269.667	0.251106
II	567606	567639	567623	+	YBR163W	utr3_extended	middle	16.0833	0.0149763
II	567666	567680	567677	+	YBR163W	utr3_extended	middle	24.6667	0.0229689
II	567691	567712	567700	+	YBR163W	utr3_extended	middle	11	0.0102429
II	567739	567764	567753	+	YBR163W	utr3_extended	middle	17.1667	0.0159851
II	567837	567865	567848	+	YBR163W	utr3_extended	last	21.75	0.020253
II	569729	569731	569729	+	YBR165W	utr3	first	10	0.213523
II	569817	569844	569833	+	YBR165W	utr3_extended	last	36.8333	0.786477
II	573275	573284	573275	+	YBR168W	coding_exon	CDS	12.1667	0.145709
II	573656	573684	573673	+	YBR168W	utr3	first	37.1667	0.44511
II	573684	573701	573685	+	YBR168W	utr3	middle	11.75	0.140719
II	573731	573762	573744	+	YBR168W	utr3	middle	38.4167	0.46008
II	573762	573792	573779	+	YBR168W	utr3	middle	18.5833	0.222555
II	573792	573816	573807	+	YBR168W	utr3_extended	middle	32.8333	0.393214
II	573816	573848	573827	+	YBR168W	utr3_extended	last	45.0833	0.53992
II	578987	579008	579007	+	YBR171W	utr3	first	49.5	0.0325877
II	579008	579036	579019	+	YBR171W	utr3_extended	middle	166.833	0.109833
II	579036	579067	579052	+	YBR171W	utr3_extended	middle	1182.4	0.778422
II	579067	579101	579067	+	YBR171W	utr3_extended	middle	336.571	0.221578
II	579101	579132	579120	+	YBR171W	utr3_extended	last	212.607	0.139967
II	583437	583462	583457	+	YBR175W	utr3	first	1194.83	0.338864
II	583462	583484	583472	+	YBR175W	utr3	last	2331.17	0.661136
II	584697	584723	584708	+	YBR176W	utr3	first	29.1429	0.0472
II	584749	584770	584759	+	YBR176W	utr3	middle	12.0833	0.0195703
II	584791	584813	584802	+	YBR176W	utr3_extended	middle	366.6	0.593748
II	584813	584840	584820	+	YBR176W	utr3_extended	middle	63.75	0.10325
II	584840	584866	584856	+	YBR176W	utr3_extended	middle	250.833	0.406252
II	584913	584925	584915	+	YBR176W	utr3_extended	last	15.2667	0.024726
II	595946	595962	595951	+	YBR183W	utr5	utr5	10	NA
II	595987	596006	595987	+	YBR183W	utr5	utr5	11	NA
II	596035	596061	596049	+	YBR183W	utr5	utr5	539.833	NA
II	596061	596084	596072	+	YBR183W	utr5	utr5	109.167	NA
II	596084	596111	596095	+	YBR183W	utr5	utr5	129.15	NA
II	596111	596143	596127	+	YBR183W	coding_exon	CDS	59.3333	NA
II	596143	596170	596159	+	YBR183W	coding_exon	CDS	305.25	NA
II	596170	596194	596175	+	YBR183W	coding_exon	CDS	29.75	NA
II	596194	596216	596207	+	YBR183W	coding_exon	CDS	25.8333	NA
II	597100	597116	597113	+	YBR183W	utr3_extended	single	12.5	1
II	599065	599096	599076	+	YBR184W	utr3	single	27.1333	1
II	603467	603486	603470	+	YBR187W	coding_exon	CDS	103.167	0.0886565
II	603486	603513	603502	+	YBR187W	utr3_extended	first	262.167	0.225294
II	603513	603524	603517	+	YBR187W	utr3_extended	middle	11.5	0.00988256
II	603582	603616	603599	+	YBR187W	utr3_extended	middle	764.167	0.656689
II	603616	603648	603633	+	YBR187W	utr3_extended	middle	283.167	0.24334
II	603648	603679	603663	+	YBR187W	utr3_extended	middle	63.8333	0.0548553
II	603704	603727	603720	+	YBR187W	utr3_extended	middle	57.1667	0.0491263
II	603727	603752	603738	+	YBR187W	utr3_extended	last	399.5	0.343311
II	605538	605565	605553	+	YBR189W	utr3_extended	first	10637	0.366225
II	605565	605599	605577	+	YBR189W	utr3_extended	last	18408	0.633775
II	606766	606788	606786	+	YBR190W	utr3_extended	single	13	1
II	607230	607262	607241	+	YBR191W	utr3_extended	first	802.667	0.0668119
II	607262	607297	607282	+	YBR191W	utr3_extended	middle	11168	0.929595
II	607308	607346	607327	+	YBR191W	utr3_extended	last	845.833	0.0704049
II	608663	608676	608667	+	YBR192W	coding_exon	CDS	30.1667	0.0933953
II	608687	608694	608687	+	YBR192W	coding_exon	CDS	22.3333	0.0691434
II	608747	608762	608758	+	YBR192W	coding_exon	CDS	20	0.0619195
II	608900	608921	608917	+	YBR192W	utr3	first	66	0.204334
II	608921	608941	608933	+	YBR192W	utr3	middle	257	0.795666
II	608976	608994	608980	+	YBR192W	utr3	middle	41	0.126935
II	608994	609020	609008	+	YBR192W	utr3	middle	13.5	0.0417957
II	609020	609047	609032	+	YBR192W	utr3	middle	23.5667	0.0729618
II	609047	609076	609062	+	YBR192W	utr3_extended	last	22.9	0.0708978
II	610078	610109	610093	+	YBR194W	coding_exon	CDS	16.9167	0.0531136
II	610548	610569	610564	+	YBR194W	utr3_extended	first	15	0.0470958
II	610569	610600	610583	+	YBR194W	utr3_extended	middle	25.6667	0.0805861
II	610600	610629	610617	+	YBR194W	utr3_extended	middle	210.833	0.661957
II	610629	610657	610632	+	YBR194W	utr3_extended	middle	60.1667	0.188906
II	610657	610684	610673	+	YBR194W	utr3_extended	last	107.667	0.338043
II	620420	620441	620430	+	YBR199W	utr3	first	849.667	0.427362
II	620441	620469	620451	+	YBR199W	utr3	middle	755.2	0.379847
II	620469	620497	620486	+	YBR199W	utr3_extended	middle	1138.5	0.572638
II	620497	620519	620500	+	YBR199W	utr3_extended	middle	152	0.0764523
II	620555	620572	620561	+	YBR199W	utr3_extended	last	18	0.00905357
II	622057	622073	622057	+	YBR200W	coding_exon	CDS	57.6667	0.140308
II	622404	622415	622404	+	YBR200W	coding_exon	CDS	11	0.026764
II	622728	622760	622748	+	YBR200W	utr3_extended	first	354.5	0.86253
II	622760	622779	622760	+	YBR200W	utr3_extended	last	56.5	0.13747
II	624053	624089	624069	+	YBR201W	coding_exon	CDS	82.4167	0.122232
II	624124	624153	624137	+	YBR201W	coding_exon	CDS	154.167	0.228643
II	624153	624179	624155	+	YBR201W	coding_exon	CDS	16.25	0.0241003
II	624179	624200	624189	+	YBR201W	coding_exon	CDS	87.4167	0.129647
II	624200	624221	624208	+	YBR201W	coding_exon	CDS	62.75	0.0930641
II	624221	624247	624226	+	YBR201W	utr3	first	15.7	0.0232846
II	624247	624271	624263	+	YBR201W	utr3	middle	20.3667	0.0302057
II	624304	624323	624312	+	YBR201W	utr3	middle	50	0.0741546
II	624323	624355	624334	+	YBR201W	utr3_extended	middle	624.267	0.925845
II	624452	624475	624464	+	YBR201W	utr3_extended	middle	37	0.0548744
II	624475	624498	624484	+	YBR201W	utr3_extended	middle	41.15	0.0610293
II	624831	624832	624831	+	YBR201W	utr3_extended	last	19	0.0281788
II	627634	627648	627636	+	YBR202W	coding_exon	CDS	33.75	0.0108196
II	627648	627667	627660	+	YBR202W	coding_exon	CDS	46	0.0147467
II	628425	628451	628439	+	YBR202W	utr3_extended	first	41.8333	0.013411
II	628451	628474	628473	+	YBR202W	utr3_extended	middle	941.333	0.301774
II	628474	628497	628485	+	YBR202W	utr3_extended	middle	2178	0.698226
II	628497	628511	628498	+	YBR202W	utr3_extended	last	34	0.0108998
II	631736	631750	631745	+	YBR203W	coding_exon	CDS	17.7	0.339297
II	632000	632014	632013	+	YBR203W	utr3	first	21	0.402556
II	632063	632089	632075	+	YBR203W	utr3	middle	14	0.268371
II	632105	632130	632116	+	YBR203W	utr3	middle	19.3333	0.370607
II	632156	632174	632167	+	YBR203W	utr3_extended	middle	19.1	0.366134
II	632453	632479	632459	+	YBR203W	utr3_extended	last	31.1667	0.597444
II	634337	634360	634348	+	YBR205W	coding_exon	CDS	122.333	0.268717
II	634436	634463	634448	+	YBR205W	coding_exon	CDS	17.5	0.0384404
II	634926	634953	634942	+	YBR206W	utr3	first	7139	0.624646
II	634976	635001	634988	+	YBR206W	utr3_extended	middle	4289.87	0.375354
II	635001	635030	635013	+	YBR206W	utr3_extended	last	1638.1	0.14333
II	635030	635058	635047	+	YBR205W	utr3_extended	first	322.25	0.707853
II	635058	635079	635064	+	YBR205W	utr3_extended	last	133	0.292147
II	636567	636600	636586	+	YBR207W	utr3	first	105.333	0.153696
II	636611	636631	636611	+	YBR207W	utr3_extended	middle	13.5	0.0196984
II	636631	636661	636652	+	YBR207W	utr3_extended	middle	310.333	0.452821
II	636661	636682	636671	+	YBR207W	utr3_extended	middle	375	0.547179
II	636682	636704	636682	+	YBR207W	utr3_extended	middle	31.8667	0.0464981
II	636704	636728	636716	+	YBR207W	utr3_extended	last	11	0.0160506
II	645464	645480	645472	+	YBR210W	utr5	utr5	13	0.0555753
II	645831	645854	645843	+	YBR210W	coding_exon	CDS	27.9	0.119273
II	646160	646177	646162	+	YBR210W	utr3_extended	first	16.5	0.0705379
II	646177	646208	646192	+	YBR210W	utr3_extended	middle	131.583	0.562522
II	646208	646235	646223	+	YBR210W	utr3_extended	middle	102.333	0.437478
II	646235	646264	646235	+	YBR210W	utr3_extended	last	17.75	0.0758817
II	647714	647735	647725	+	YBR212W	utr5	utr5	193.5	0.21608
II	647832	647854	647843	+	YBR212W	utr5	utr5	21	0.0234506
II	649836	649861	649846	+	YBR212W	coding_exon	CDS	26	0.0290341
II	649874	649894	649883	+	YBR212W	coding_exon	CDS	73.6667	0.0822632
II	650039	650064	650049	+	YBR212W	utr3	first	307	0.342825
II	650093	650120	650109	+	YBR212W	utr3_extended	middle	588.5	0.657175
II	650120	650141	650120	+	YBR212W	utr3_extended	last	89.7333	0.100205
II	651298	651333	651314	+	YBR213W	utr3	first	428.667	0.696736
II	651372	651399	651387	+	YBR213W	utr3_extended	middle	186.583	0.303264
II	651399	651424	651406	+	YBR213W	utr3_extended	last	40.1667	0.0652851
II	652381	652388	652385	+	YBR214W	coding_exon	CDS	10.1667	NA
II	655373	655394	655380	+	YBR215W	utr3	first	37.75	0.0891908
II	655421	655445	655434	+	YBR215W	utr3	middle	368	0.869462
II	655480	655507	655491	+	YBR215W	utr3_extended	middle	12.5833	0.0297303
II	655606	655628	655616	+	YBR215W	utr3_extended	middle	34	0.0803308
II	655628	655648	655640	+	YBR215W	utr3_extended	middle	16.3333	0.0385903
II	655697	655711	655709	+	YBR215W	utr3_extended	middle	12	0.028352
II	655776	655798	655781	+	YBR215W	utr3_extended	last	55.25	0.130538
II	658340	658354	658343	+	YBR217W	coding_exon	CDS	11.3333	0.0147454
II	658496	658516	658505	+	YBR217W	utr3	first	20.5333	0.0267152
II	658669	658700	658680	+	YBR217W	utr3	middle	189.933	0.247116
II	658700	658727	658719	+	YBR217W	utr3	last	578.667	0.752884
II	671785	671805	671794	+	YBR225W	coding_exon	CDS	56	0.538462
II	671805	671836	671806	+	YBR225W	coding_exon	CDS	80.3333	0.772436
II	672363	672373	672368	+	YBR225W	coding_exon	CDS	106.5	1.02404
II	672837	672858	672852	+	YBR225W	coding_exon	CDS	59.1667	0.56891
II	672918	672942	672931	+	YBR225W	coding_exon	CDS	220.083	2.11619
II	672942	672957	672944	+	YBR225W	coding_exon	CDS	54.6333	0.525321
II	673553	673583	673572	+	YBR225W	utr3_extended	first	83	0.798077
II	673583	673609	673591	+	YBR225W	utr3_extended	middle	18.3333	0.176282
II	673642	673660	673649	+	YBR225W	utr3_extended	last	21	0.201923
II	676290	676316	676302	+	YBR228W	utr3_extended	first	63	0.724138
II	676316	676342	676330	+	YBR228W	utr3_extended	last	24	0.275862
II	680583	680617	680601	+	YBR230W-A	utr3	first	56.8333	0.600881
II	680617	680646	680633	+	YBR230W-A	utr3	middle	15.3333	0.162115
II	680671	680696	680684	+	YBR230W-A	utr3	middle	10.7061	0.113192
II	680696	680721	680707	+	YBR230W-A	utr3	middle	37.75	0.399119
II	680721	680751	680734	+	YBR230W-A	utr3	middle	20	0.211454
II	680751	680779	680768	+	YBR230W-A	utr3_extended	last	18	0.190308
II	684798	684821	684803	+	YBR233W	utr3	first	87.6667	0.140028
II	684821	684850	684838	+	YBR233W	utr3_extended	last	538.4	0.859972
II	685286	685307	685293	+	YBR233W-A	utr3	first	50.5	0.064745
II	685370	685404	685388	+	YBR233W-A	utr3	middle	40.8333	0.0523515
II	685446	685471	685460	+	YBR233W-A	utr3_extended	middle	118.167	0.151499
II	685471	685493	685477	+	YBR233W-A	utr3_extended	middle	80.3333	0.102994
II	685493	685517	685504	+	YBR233W-A	utr3_extended	middle	329.4	0.422317
II	685517	685543	685529	+	YBR233W-A	utr3_extended	middle	153.333	0.196585
II	685543	685572	685557	+	YBR233W-A	utr3_extended	middle	153	0.196158
II	685572	685599	685587	+	YBR233W-A	utr3_extended	middle	450.583	0.577683
II	685599	685623	685605	+	YBR233W-A	utr3_extended	last	61.4167	0.078741
II	686929	686955	686943	+	YBR235W	coding_exon	CDS	12.6667	0.0197147
II	688085	688112	688094	+	YBR235W	coding_exon	CDS	32	0.0498054
II	688159	688179	688164	+	YBR235W	coding_exon	CDS	26.0333	0.0405188
II	688585	688611	688601	+	YBR235W	coding_exon	CDS	11.4286	0.0177877
II	690034	690059	690053	+	YBR235W	coding_exon	CDS	24.8333	0.0386511
II	690265	690298	690284	+	YBR235W	utr3	first	22.3333	0.0347601
II	690298	690323	690312	+	YBR235W	utr3	middle	13.5	0.0210117
II	690323	690346	690333	+	YBR235W	utr3	middle	47.0833	0.0732815
II	690346	690371	690359	+	YBR235W	utr3_extended	middle	584	0.908949
II	690371	690396	690372	+	YBR235W	utr3_extended	last	58.5	0.0910506
II	692648	692657	692653	+	YBR237W	coding_exon	CDS	15	0.0173344
II	692677	692701	692681	+	YBR237W	coding_exon	CDS	13.1333	0.0151772
II	692718	692731	692720	+	YBR237W	coding_exon	CDS	21.5	0.0248459
II	692773	692789	692777	+	YBR237W	coding_exon	CDS	10.9333	0.0126348
II	692789	692817	692800	+	YBR237W	coding_exon	CDS	17.6667	0.020416
II	694539	694564	694546	+	YBR237W	utr3_extended	first	155	0.179122
II	694577	694596	694585	+	YBR237W	utr3_extended	middle	574.167	0.663521
II	694596	694610	694607	+	YBR237W	utr3_extended	last	291.167	0.336479
II	705209	705238	705225	+	YBR242W	coding_exon	CDS	18.9167	0.025058
II	705392	705420	705413	+	YBR242W	utr3_extended	first	62.3167	0.0825477
II	705420	705444	705433	+	YBR242W	utr3_extended	middle	90	0.119218
II	705444	705465	705454	+	YBR242W	utr3_extended	middle	567.167	0.751297
II	705465	705490	705475	+	YBR242W	utr3_extended	middle	187.75	0.248703
II	705490	705524	705505	+	YBR242W	utr3_extended	middle	44.7667	0.0593001
II	705524	705553	705542	+	YBR242W	utr3_extended	middle	162.5	0.215256
II	705553	705569	705554	+	YBR242W	utr3_extended	middle	67.6667	0.0896346
II	705602	705615	705611	+	YBR242W	utr3_extended	last	10	0.0132465
II	708039	708061	708049	+	YBR244W	utr3	first	85.0833	0.0812251
II	708061	708092	708072	+	YBR244W	utr3	middle	315	0.300716
II	708092	708123	708111	+	YBR244W	utr3	middle	153.611	0.146645
II	708123	708149	708135	+	YBR244W	utr3	middle	73.2778	0.0699549
II	708149	708183	708163	+	YBR244W	utr3_extended	middle	64.1667	0.061257
II	708183	708213	708202	+	YBR244W	utr3_extended	middle	732.5	0.699284
II	708213	708235	708220	+	YBR244W	utr3_extended	middle	168.833	0.161177
II	708235	708253	708246	+	YBR244W	utr3_extended	middle	18.6667	0.0178202
II	708265	708287	708268	+	YBR244W	utr3_extended	middle	22.75	0.0217184
II	708300	708315	708300	+	YBR244W	utr3_extended	last	22.5	0.0214797
II	712843	712869	712848	+	YBR246W	utr3_extended	first	12.5	0.0205198
II	712869	712901	712890	+	YBR246W	utr3_extended	middle	565.167	0.92777
II	712901	712924	712911	+	YBR246W	utr3_extended	last	44	0.0722298
II	720732	720745	720734	+	YBR250W	utr3	single	98.6667	1
II	722060	722088	722076	+	YBR251W	coding_exon	CDS	10	0.0150113
II	722088	722117	722099	+	YBR251W	coding_exon	CDS	70.6	0.105979
II	722215	722242	722225	+	YBR251W	coding_exon	CDS	22.2	0.033325
II	722311	722338	722336	+	YBR251W	utr3	first	16.25	0.0243933
II	722338	722372	722351	+	YBR251W	utr3	middle	35.5833	0.0534151
II	722372	722409	722393	+	YBR251W	utr3_extended	middle	494.417	0.742182
II	722409	722444	722424	+	YBR251W	utr3_extended	last	171.75	0.257818
II	723102	723127	723116	+	YBR252W	utr3	first	15130.4	0.78697
II	723127	723152	723127	+	YBR252W	utr3	middle	4095.75	0.21303
II	723152	723177	723166	+	YBR252W	utr3_extended	last	605.417	0.0314892
II	723715	723745	723726	+	YBR253W	utr3_extended	single	2206.5	1
II	726343	726365	726353	+	YBR255W	coding_exon	CDS	10.75	0.0234035
II	726525	726542	726537	+	YBR255W	coding_exon	CDS	35.6667	0.0776488
II	726581	726595	726583	+	YBR255W	utr3	first	190.667	0.415094
II	726617	726640	726627	+	YBR255W	utr3	middle	93.6667	0.203919
II	726668	726695	726682	+	YBR255W	utr3_extended	middle	268.667	0.584906
II	726695	726713	726707	+	YBR255W	utr3_extended	middle	28	0.0609579
II	727034	727055	727043	+	YBR255W	utr3_extended	middle	130.167	0.283382
II	727067	727084	727078	+	YBR255W	utr3_extended	last	10.5	0.0228592
II	729569	729584	729569	+	YBR257W	coding_exon	CDS	12.5833	0.0141704
II	729734	729761	729744	+	YBR257W	utr3_extended	first	355.5	0.400338
II	729761	729790	729777	+	YBR257W	utr3_extended	middle	474	0.533784
II	729790	729815	729796	+	YBR257W	utr3_extended	middle	34	0.0382883
II	729844	729883	729864	+	YBR257W	utr3_extended	middle	414	0.466216
II	729975	730001	729984	+	YBR257W	utr3_extended	middle	17.1667	0.0193318
II	730001	730037	730018	+	YBR257W	utr3_extended	last	10.3667	0.0116742
II	731925	731942	731929	+	YBR259W	coding_exon	CDS	20.3333	0.0807947
II	732256	732266	732259	+	YBR259W	coding_exon	CDS	27.5	0.109272
II	732510	732526	732515	+	YBR259W	utr3_extended	first	171.167	0.680132
II	732526	732539	732535	+	YBR259W	utr3_extended	middle	16	0.0635762
II	732578	732601	732589	+	YBR259W	utr3_extended	middle	40.5833	0.161258
II	732623	732645	732633	+	YBR259W	utr3_extended	middle	80.5	0.319868
II	732677	732702	732691	+	YBR259W	utr3_extended	middle	16.7667	0.0666225
II	732897	732910	732897	+	YBR259W	utr3_extended	last	41.3333	0.164238
II	737759	737786	737770	+	YBR263W	utr3	first	251.167	0.0355198
II	737786	737818	737801	+	YBR263W	utr3	middle	6820	0.96448
II	737879	737904	737889	+	YBR263W	utr3_extended	last	88.5	0.0125156
II	739652	739675	739667	+	YBR265W	utr3	first	799.833	0.385122
II	739675	739697	739686	+	YBR265W	utr3	last	1277	0.614878
II	740643	740667	740656	+	YBR267W	coding_exon	CDS	42.6667	0.0270213
II	741096	741124	741107	+	YBR267W	utr3	first	555	0.351488
II	741124	741154	741141	+	YBR267W	utr3_extended	middle	1024	0.648512
II	741154	741177	741154	+	YBR267W	utr3_extended	last	104.917	0.066445
II	741674	741700	741694	+	YBR268W	utr3_extended	first	158.75	0.0749233
II	741700	741722	741711	+	YBR268W	utr3_extended	middle	1873.83	0.88437
II	741722	741748	741733	+	YBR268W	utr3_extended	middle	245	0.11563
II	741748	741773	741762	+	YBR268W	utr3_extended	middle	113.783	0.0537009
II	741773	741794	741778	+	YBR268W	utr3_extended	last	33.8667	0.0159836
II	746104	746130	746108	+	YBR271W	coding_exon	CDS	424.333	0.785027
II	746130	746165	746151	+	YBR271W	utr3	first	40.3333	0.0746177
II	746165	746193	746178	+	YBR271W	utr3	middle	136.5	0.252528
II	746193	746222	746208	+	YBR271W	utr3	middle	399.833	0.739702
II	746222	746248	746245	+	YBR271W	utr3	middle	17.2	0.0318204
II	746248	746272	746260	+	YBR271W	utr3	middle	140.7	0.260298
II	746272	746292	746272	+	YBR271W	utr3	last	70	0.129502
II	751293	751314	751294	+	YBR274W	utr3_extended	first	28	0.0112435
II	751314	751344	751333	+	YBR274W	utr3_extended	middle	2097	0.842056
II	751344	751367	751344	+	YBR274W	utr3_extended	middle	62	0.0248963
II	751367	751391	751380	+	YBR274W	utr3_extended	middle	393.333	0.157944
II	751413	751439	751424	+	YBR274W	utr3_extended	last	25.6667	0.0103065
II	760968	760996	760982	+	YBR278W	utr3	first	318.733	0.582978
II	760996	761020	760996	+	YBR278W	utr3	middle	24.9	0.0455432
II	761020	761042	761031	+	YBR278W	utr3_extended	middle	175	0.320083
II	761042	761065	761043	+	YBR278W	utr3_extended	middle	41.1667	0.0752957
II	761065	761091	761090	+	YBR278W	utr3_extended	middle	108.267	0.198025
II	761091	761115	761103	+	YBR278W	utr3_extended	last	228	0.417022
II	762691	762726	762711	+	YBR279W	utr3_extended	first	475.067	0.905061
II	762726	762751	762740	+	YBR279W	utr3_extended	last	49.8333	0.0949387
II	768714	768744	768725	+	YBR282W	utr3_extended	first	43.6429	0.208682
II	768744	768781	768762	+	YBR282W	utr3_extended	middle	165.493	0.791318
II	768781	768803	768800	+	YBR282W	utr3_extended	last	26.1	0.124799
II	771514	771528	771525	+	YBR284W	coding_exon	CDS	10	NA
II	771528	771543	771542	+	YBR284W	coding_exon	CDS	11.5	NA
II	771703	771725	771713	+	YBR284W	coding_exon	CDS	21	NA
II	773792	773810	773799	+	YBR284W	utr3	single	77.8333	1
II	774494	774524	774506	+	YBR285W	utr3	single	14.5	1
II	774771	774783	774782	+	YBR286W	coding_exon	CDS	150	0.0564963
II	775584	775602	775597	+	YBR286W	coding_exon	CDS	74.5	0.0280598
II	775614	775625	775614	+	YBR286W	coding_exon	CDS	106.167	0.0399868
II	776363	776397	776378	+	YBR286W	utr3_extended	first	2635.67	0.992703
II	776397	776434	776398	+	YBR286W	utr3_extended	last	19.375	0.00729744
II	777646	777672	777661	+	YBR287W	coding_exon	CDS	615.5	0.456783
II	777672	777684	777677	+	YBR287W	coding_exon	CDS	232	0.172175
II	777813	777835	777819	+	YBR287W	coding_exon	CDS	12.8333	0.00952405
II	777835	777862	777856	+	YBR287W	utr3	first	84.1667	0.0624629
II	777862	777893	777873	+	YBR287W	utr3	middle	548.667	0.407184
II	777893	777922	777913	+	YBR287W	utr3_extended	middle	471	0.349545
II	777949	777979	777967	+	YBR287W	utr3_extended	middle	552.333	0.409905
II	777979	778005	777979	+	YBR287W	utr3_extended	middle	21.6667	0.0160796
II	778005	778030	778020	+	YBR287W	utr3_extended	middle	795.133	0.590095
II	778080	778095	778082	+	YBR287W	utr3_extended	last	22.3333	0.0165743
II	781286	781302	781293	+	YBR289W	coding_exon	CDS	52.6667	0.0625743
II	781343	781369	781355	+	YBR289W	coding_exon	CDS	24.6667	0.0293069
II	781497	781500	781497	+	YBR289W	coding_exon	CDS	11	0.0130693
II	782409	782431	782420	+	YBR289W	utr3_extended	first	42.1667	0.050099
II	782431	782454	782441	+	YBR289W	utr3_extended	middle	644.167	0.765347
II	782454	782479	782467	+	YBR289W	utr3_extended	middle	197.5	0.234653
II	782479	782496	782482	+	YBR289W	utr3_extended	last	11.8333	0.0140594
II	782866	782890	782877	+	YBR290W	coding_exon	CDS	18	0.0162626
II	782890	782918	782902	+	YBR290W	coding_exon	CDS	45.6667	0.0412588
II	782918	782948	782921	+	YBR290W	coding_exon	CDS	24.6667	0.0222858
II	782948	782974	782963	+	YBR290W	coding_exon	CDS	15	0.0135522
II	783132	783150	783143	+	YBR290W	coding_exon	CDS	24.6667	0.0222858
II	783150	783177	783162	+	YBR290W	coding_exon	CDS	143	0.129197
II	783177	783210	783192	+	YBR290W	coding_exon	CDS	10	0.00903478
II	783613	783628	783613	+	YBR290W	utr3	first	25.25	0.0228128
II	783628	783663	783642	+	YBR290W	utr3	middle	797.5	0.720524
II	783663	783694	783683	+	YBR290W	utr3	middle	309.333	0.279476
II	783726	783743	783732	+	YBR290W	utr3_extended	last	10.3333	0.00933594
II	787988	788000	787997	+	YBR293W	coding_exon	CDS	27.1667	0.0858618
II	788096	788111	788096	+	YBR293W	coding_exon	CDS	33.3333	0.105352
II	788176	788211	788191	+	YBR293W	coding_exon	CDS	16.4167	0.0518858
II	788471	788493	788481	+	YBR293W	utr3	first	17.5833	0.0555731
II	788493	788516	788500	+	YBR293W	utr3	middle	24.25	0.0766435
II	788516	788532	788527	+	YBR293W	utr3	middle	25.5	0.0805942
II	788579	788600	788597	+	YBR293W	utr3_extended	middle	23	0.0726928
II	788621	788649	788634	+	YBR293W	utr3_extended	middle	149.5	0.472503
II	788649	788676	788663	+	YBR293W	utr3_extended	middle	166.9	0.527497
II	788676	788701	788688	+	YBR293W	utr3_extended	middle	21.6786	0.0685163
II	788701	788727	788714	+	YBR293W	utr3_extended	last	18	0.05689
II	792796	792812	792806	+	YBR295W	utr5	utr5	10.5	0.0500795
II	794781	794807	794792	+	YBR295W	coding_exon	CDS	34	0.162162
II	795423	795440	795429	+	YBR295W	coding_exon	CDS	20.5	0.0977742
II	796279	796308	796297	+	YBR295W	coding_exon	CDS	35.1667	0.167727
II	796505	796530	796519	+	YBR295W	utr3_extended	first	167.5	0.798887
II	796530	796542	796539	+	YBR295W	utr3_extended	middle	39	0.18601
II	796601	796620	796618	+	YBR295W	utr3_extended	middle	42.1667	0.201113
II	796639	796664	796652	+	YBR295W	utr3_extended	middle	18	0.0858506
II	796664	796685	796664	+	YBR295W	utr3_extended	last	10.4583	0.0498808
II	800601	800619	800601	+	YBR297W	coding_exon	CDS	10.5	0.0263709
II	800725	800753	800738	+	YBR297W	coding_exon	CDS	11.1667	0.0280452
II	800936	800969	800951	+	YBR297W	coding_exon	CDS	17.7	0.0444537
II	800999	801031	801019	+	YBR297W	coding_exon	CDS	12.5	0.0313939
II	802131	802153	802146	+	YBR297W	utr3	first	70.6667	0.17748
II	802153	802185	802165	+	YBR297W	utr3	last	327.5	0.82252
II	807153	807176	807160	+	YBR299W	utr3	first	59.5	0.476636
II	807221	807249	807233	+	YBR299W	utr3	middle	65.3333	0.523364
II	807613	807629	807613	+	YBR299W	utr3_extended	last	21.5	0.17223
II	809492	809499	809494	+	YBR301W	utr3	single	10.5	1
III	18574	18581	18578	+	YCL063W	utr3	first	11.3333	0.0604444
III	18648	18664	18658	+	YCL063W	utr3_extended	middle	11.5	0.0613333
III	18678	18703	18692	+	YCL063W	utr3_extended	middle	30.8667	0.164622
III	18703	18721	18713	+	YCL063W	utr3_extended	middle	77	0.410667
III	18739	18767	18750	+	YCL063W	utr3_extended	middle	110.5	0.589333
III	18767	18786	18783	+	YCL063W	utr3_extended	last	22.5	0.12
III	23977	24005	23986	+	YCL058W-A	utr3	single	1428.83	1
III	24732	24749	24743	+	YCL057W	utr5	utr5	31.3333	0.00667974
III	26526	26538	26529	+	YCL057W	coding_exon	CDS	49.5	0.0105526
III	26612	26626	26617	+	YCL057W	coding_exon	CDS	47.5	0.0101262
III	26938	26972	26956	+	YCL057W	utr3	first	135.333	0.0288508
III	26972	27000	26988	+	YCL057W	utr3	middle	2614.63	0.557396
III	27000	27028	27011	+	YCL057W	utr3	middle	1106.5	0.235887
III	27028	27055	27044	+	YCL057W	utr3	middle	2076.17	0.442604
III	27055	27079	27055	+	YCL057W	utr3	last	676.667	0.144254
III	29003	29033	29018	+	YCL055W	utr3_extended	first	292.25	0.730169
III	29033	29065	29048	+	YCL055W	utr3_extended	middle	22.3	0.0557152
III	29065	29101	29081	+	YCL055W	utr3_extended	middle	19.4333	0.048553
III	29101	29131	29120	+	YCL055W	utr3_extended	middle	108	0.269831
III	29131	29160	29141	+	YCL055W	utr3_extended	last	75	0.187383
III	32060	32079	32061	+	YCL054W	coding_exon	CDS	11.25	0.105061
III	32079	32112	32096	+	YCL054W	coding_exon	CDS	13.9333	0.13012
III	32880	32895	32882	+	YCL054W	coding_exon	CDS	16	0.14942
III	33123	33152	33139	+	YCL054W	coding_exon	CDS	11.8333	0.110508
III	34073	34110	34091	+	YCL054W	utr3_extended	first	81.881	0.764664
III	34110	34141	34128	+	YCL054W	utr3_extended	last	25.2	0.235336
III	37647	37674	37661	+	YCL051W	utr3_extended	first	82.3333	0.504082
III	37719	37742	37730	+	YCL051W	utr3_extended	last	81	0.495918
III	41379	41394	41383	+	YCL048W-A	utr5	utr5	28.6667	NA
III	41394	41406	41394	+	YCL048W-A	utr5	utr5	11	NA
III	43647	43650	43648	+	YCL048W	utr3	single	11	1
III	51610	51638	51621	+	YCL042W	utr3_extended	single	12.1667	1
III	51638	51670	51654	+	YCL040W	coding_exon	CDS	43.1667	NA
III	52492	52507	52496	+	YCL039W	utr5	utr5	57.8333	NA
III	52507	52528	52517	+	YCL039W	utr5	utr5	2999.08	NA
III	52528	52557	52536	+	YCL039W	utr5	utr5	518	NA
III	60759	60776	60772	+	YCL036W	utr3_extended	first	11.5	0.0936591
III	60812	60831	60821	+	YCL036W	utr3_extended	middle	53.7857	0.438045
III	60831	60855	60841	+	YCL036W	utr3_extended	middle	69	0.561955
III	60855	60883	60869	+	YCL036W	utr3_extended	last	10.5	0.0855148
III	62783	62801	62793	+	YCL034W	utr3_extended	first	67	0.148504
III	62821	62853	62841	+	YCL034W	utr3_extended	last	384.167	0.851496
III	64562	64592	64580	+	YCL032W	utr3_extended	first	131.625	0.575305
III	64592	64621	64599	+	YCL032W	utr3_extended	middle	30.5	0.133309
III	64663	64688	64675	+	YCL032W	utr3_extended	middle	89.5	0.391186
III	64688	64718	64700	+	YCL032W	utr3_extended	last	97.1667	0.424695
III	71424	71451	71435	+	YCL028W	utr3_extended	first	1466.33	0.574357
III	71451	71478	71474	+	YCL028W	utr3_extended	middle	55.5	0.0217391
III	71478	71506	71490	+	YCL028W	utr3_extended	last	1086.67	0.425643
III	71739	71760	71758	+	YCL027W	utr5	utr5	20.5	0.239766
III	73379	73412	73393	+	YCL027W	utr3_extended	first	11.6667	0.136452
III	73412	73445	73431	+	YCL027W	utr3_extended	last	73.8333	0.863548
III	81330	81346	81332	+	YCL024W	coding_exon	CDS	21.6667	0.586907
III	81346	81362	81359	+	YCL024W	coding_exon	CDS	20.5	0.555305
III	82064	82077	82064	+	YCL024W	coding_exon	CDS	12.5	0.3386
III	82102	82125	82114	+	YCL024W	coding_exon	CDS	22	0.595937
III	82205	82234	82224	+	YCL024W	coding_exon	CDS	13	0.352144
III	82350	82374	82362	+	YCL024W	utr3_extended	first	20.9167	0.566591
III	82374	82394	82385	+	YCL024W	utr3_extended	last	16	0.433409
III	84090	84103	84094	+	YCL021W-A	utr3	first	118.5	0.371473
III	84298	84310	84299	+	YCL021W-A	utr3_extended	middle	131.667	0.412748
III	84310	84329	84320	+	YCL021W-A	utr3_extended	last	187.333	0.587252
III	92476	92504	92491	+	YCL018W	utr3	first	108.85	0.475639
III	92504	92532	92516	+	YCL018W	utr3_extended	last	120	0.524361
III	98118	98147	98129	+	YCL014W	coding_exon	CDS	29.0833	0.153501
III	101196	101203	101201	+	YCL014W	utr3	first	15	0.0791696
III	101288	101307	101292	+	YCL014W	utr3	middle	48.4667	0.255806
III	101307	101331	101321	+	YCL014W	utr3_extended	middle	141	0.744194
III	101431	101447	101441	+	YCL014W	utr3_extended	last	10.6667	0.0562984
III	107504	107529	107518	+	YCL005W-A	utr3	first	1453.25	0.756343
III	107529	107550	107539	+	YCL005W-A	utr3	last	468.167	0.243657
III	108874	108887	108882	+	YCL005W	utr3_extended	first	13	0.00315266
III	108887	108913	108911	+	YCL005W	utr3_extended	middle	1108.5	0.268825
III	108913	108941	108927	+	YCL005W	utr3_extended	middle	3015	0.731175
III	108941	108969	108941	+	YCL005W	utr3_extended	middle	42.9167	0.0104078
III	108980	109000	108989	+	YCL005W	utr3_extended	last	325	0.0788165
III	110587	110614	110598	+	YCL004W	coding_exon	CDS	33.25	NA
III	111290	111301	111290	+	YCL004W	utr3_extended	single	12.2	1
III	112457	112483	112471	+	YCL001W	coding_exon	CDS	51.0833	0.0489195
III	112511	112546	112527	+	YCL001W	utr3	first	426.567	0.408497
III	112546	112577	112565	+	YCL001W	utr3_extended	middle	617.667	0.591503
III	112577	112604	112583	+	YCL001W	utr3_extended	last	223.5	0.214033
III	114275	114287	114280	+	YCL001W-B	utr3_extended	single	28	1
III	115729	115737	115729	+	YCR001W	coding_exon	CDS	12.5	NA
III	119236	119264	119256	+	YCR003W	utr3	first	185.75	0.230626
III	119264	119286	119275	+	YCR003W	utr3	middle	619.667	0.769374
III	119286	119309	119289	+	YCR003W	utr3_extended	last	37.85	0.0469943
III	128718	128721	128718	+	YCR008W	coding_exon	CDS	10.5	0.100159
III	129024	129046	129034	+	YCR008W	coding_exon	CDS	47	0.448331
III	130122	130150	130134	+	YCR008W	coding_exon	CDS	42.75	0.40779
III	130150	130184	130166	+	YCR008W	coding_exon	CDS	107	1.02067
III	130334	130353	130334	+	YCR008W	utr3_extended	first	24.8333	0.236884
III	130353	130390	130372	+	YCR008W	utr3_extended	middle	80	0.763116
III	130474	130488	130486	+	YCR008W	utr3_extended	last	14.5	0.138315
III	137770	137792	137781	+	YCR012W	coding_exon	CDS	10.3333	0.00624144
III	137816	137842	137829	+	YCR012W	coding_exon	CDS	26.8333	0.0162076
III	137842	137870	137843	+	YCR012W	coding_exon	CDS	18.4167	0.0111239
III	137900	137917	137916	+	YCR012W	coding_exon	CDS	11.5	0.00694612
III	137972	138000	137982	+	YCR012W	coding_exon	CDS	106.833	0.0645285
III	138000	138031	138018	+	YCR012W	coding_exon	CDS	82.3333	0.0497302
III	138098	138128	138109	+	YCR012W	coding_exon	CDS	46.8333	0.0282878
III	138128	138162	138147	+	YCR012W	coding_exon	CDS	62.65	0.0378413
III	138235	138257	138246	+	YCR012W	coding_exon	CDS	52	0.0314086
III	138338	138372	138361	+	YCR012W	coding_exon	CDS	27.3333	0.0165096
III	138525	138538	138536	+	YCR012W	coding_exon	CDS	85.25	0.0514919
III	138570	138596	138584	+	YCR012W	coding_exon	CDS	73.1667	0.0441934
III	138641	138673	138655	+	YCR012W	coding_exon	CDS	43.6667	0.0263751
III	138802	138824	138817	+	YCR012W	coding_exon	CDS	49.3333	0.0297979
III	139074	139102	139084	+	YCR012W	utr3	first	330.333	0.199525
III	139102	139135	139131	+	YCR012W	utr3_extended	middle	56.3333	0.0340259
III	139135	139163	139150	+	YCR012W	utr3_extended	middle	1325.27	0.800475
III	139163	139190	139176	+	YCR012W	utr3_extended	last	37.1667	0.0224491
III	144412	144422	144421	+	YCR016W	coding_exon	CDS	41	0.10884
III	144549	144574	144561	+	YCR016W	utr3_extended	first	112.667	0.299089
III	144574	144600	144577	+	YCR016W	utr3_extended	middle	255	0.676931
III	144600	144623	144604	+	YCR016W	utr3_extended	middle	101.767	0.270153
III	144623	144654	144631	+	YCR016W	utr3_extended	middle	49.5833	0.131626
III	144654	144685	144674	+	YCR016W	utr3_extended	middle	121.7	0.323069
III	144685	144710	144695	+	YCR016W	utr3_extended	middle	45.5	0.120786
III	144710	144739	144725	+	YCR016W	utr3_extended	last	28.3333	0.0752146
III	153905	153930	153929	+	YCR019W	utr3	first	37.9	0.0475008
III	153930	153954	153943	+	YCR019W	utr3	middle	574.5	0.720032
III	153999	154024	154007	+	YCR019W	utr3_extended	middle	21.3333	0.0267375
III	154024	154052	154041	+	YCR019W	utr3_extended	middle	223.381	0.279968
III	154052	154068	154054	+	YCR019W	utr3_extended	middle	26	0.0325863
III	154132	154159	154142	+	YCR019W	utr3_extended	middle	116.05	0.145448
III	154159	154185	154176	+	YCR019W	utr3_extended	last	39.8333	0.0499239
III	156003	156026	156015	+	YCR020W-B	utr3_extended	first	37.9833	0.479891
III	156026	156046	156036	+	YCR020W-B	utr3_extended	middle	28.1	0.355022
III	156064	156076	156064	+	YCR020W-B	utr3_extended	last	41.1667	0.520109
III	180386	180408	180401	+	YCR032W	coding_exon	CDS	11	0.0116639
III	180430	180455	180443	+	YCR032W	coding_exon	CDS	32.3333	0.0342847
III	180515	180540	180522	+	YCR032W	coding_exon	CDS	13.1667	0.0139613
III	180755	180768	180755	+	YCR032W	coding_exon	CDS	13.3333	0.014138
III	180932	180945	180942	+	YCR032W	coding_exon	CDS	32	0.0339313
III	184653	184680	184665	+	YCR032W	coding_exon	CDS	45	0.0477158
III	186059	186087	186070	+	YCR032W	utr3	first	41.75	0.0442697
III	186087	186117	186103	+	YCR032W	utr3	middle	459.583	0.48732
III	186117	186147	186131	+	YCR032W	utr3	middle	29.5	0.0312804
III	186147	186172	186162	+	YCR032W	utr3	last	483.5	0.51268
III	187108	187119	187108	+	YCR033W	coding_exon	CDS	12.6667	0.0250494
III	187119	187138	187130	+	YCR033W	coding_exon	CDS	22.5	0.0444957
III	190313	190332	190319	+	YCR033W	utr3	first	33.1667	0.06559
III	190332	190364	190344	+	YCR033W	utr3_extended	last	472.5	0.93441
III	191112	191133	191128	+	YCR034W	coding_exon	CDS	81.5	0.0152102
III	191319	191338	191333	+	YCR034W	coding_exon	CDS	73	0.0136238
III	191366	191379	191368	+	YCR034W	coding_exon	CDS	284.333	0.0530645
III	191425	191451	191439	+	YCR034W	coding_exon	CDS	84.5	0.01577
III	191678	191702	191690	+	YCR034W	utr3	first	113	0.0210889
III	191702	191725	191714	+	YCR034W	utr3	middle	77.5	0.0144636
III	191747	191777	191758	+	YCR034W	utr3	middle	118	0.0220221
III	191777	191807	191796	+	YCR034W	utr3_extended	middle	5089.93	0.949922
III	191807	191836	191808	+	YCR034W	utr3_extended	middle	268.333	0.0500784
III	191884	191913	191899	+	YCR034W	utr3_extended	last	119.333	0.0222709
III	194299	194331	194315	+	YCR036W	utr3	first	720.333	0.803346
III	194331	194363	194331	+	YCR036W	utr3_extended	middle	176.333	0.196654
III	194363	194392	194380	+	YCR036W	utr3_extended	middle	59.5833	0.0664498
III	194778	194793	194787	+	YCR036W	utr3_extended	last	26.3333	0.029368
III	201177	201192	201181	+	YCR040W	utr3_extended	first	171	0.784404
III	201192	201214	201195	+	YCR040W	utr3_extended	middle	16.0833	0.0737768
III	201214	201244	201225	+	YCR040W	utr3_extended	middle	16.25	0.0745413
III	201244	201273	201263	+	YCR040W	utr3_extended	middle	21.4167	0.0982416
III	201535	201556	201544	+	YCR040W	utr3_extended	last	47	0.215596
III	213931	213954	213952	+	YCR048W	utr3_extended	first	130.333	0.045806
III	213954	213979	213967	+	YCR048W	utr3_extended	last	2715	0.954194
III	214860	214881	214870	+	YCR051W	utr3_extended	first	4166.1	0.837131
III	214881	214905	214889	+	YCR051W	utr3_extended	middle	810.542	0.162869
III	214905	214936	214918	+	YCR051W	utr3_extended	last	299.508	0.0601828
III	216619	216643	216629	+	YCR053W	utr5	utr5	420	0.0520937
III	216643	216673	216656	+	YCR053W	utr5	utr5	223.25	0.0276903
III	216673	216703	216689	+	YCR053W	utr5	utr5	273.5	0.0339229
III	218309	218337	218320	+	YCR053W	utr3_extended	first	6236.33	0.773508
III	218337	218373	218353	+	YCR053W	utr3_extended	middle	1826.07	0.226492
III	218373	218403	218392	+	YCR053W	utr3_extended	middle	410.9	0.050965
III	218403	218426	218414	+	YCR053W	utr3_extended	middle	1824	0.226235
III	218450	218481	218461	+	YCR053W	utr3_extended	last	172	0.0213336
III	224842	224876	224856	+	YCR060W	utr3_extended	first	4407	0.993649
III	224876	224908	224876	+	YCR060W	utr3_extended	middle	28.1667	0.00635076
III	224908	224932	224920	+	YCR060W	utr3_extended	last	23.8333	0.00537372
III	226584	226593	226585	+	YCR061W	coding_exon	CDS	61.6667	0.0640426
III	226731	226759	226744	+	YCR061W	coding_exon	CDS	22.6667	0.02354
III	226759	226778	226774	+	YCR061W	coding_exon	CDS	26	0.0270018
III	227475	227484	227482	+	YCR061W	utr3	first	50	0.0519265
III	227665	227694	227680	+	YCR061W	utr3	middle	53.9	0.0559767
III	227743	227768	227760	+	YCR061W	utr3_extended	middle	13.1333	0.0136394
III	227768	227798	227780	+	YCR061W	utr3_extended	middle	47.4667	0.0492955
III	227798	227821	227815	+	YCR061W	utr3_extended	last	909	0.944023
III	228577	228594	228586	+	YCR063W	coding_exon	CDS	10.5	0.018973
III	228607	228623	228613	+	YCR063W	coding_exon	CDS	10.1667	0.0183707
III	229146	229165	229151	+	YCR063W	utr3	first	29.8333	0.0539075
III	229165	229189	229178	+	YCR063W	utr3	middle	474.417	0.85725
III	229189	229213	229199	+	YCR063W	utr3	last	79	0.14275
III	230342	230356	230342	+	YCR065W	coding_exon	CDS	11.6667	0.0457218
III	230356	230381	230370	+	YCR065W	coding_exon	CDS	53.6	0.210059
III	230755	230765	230763	+	YCR065W	coding_exon	CDS	13.5	0.0529066
III	231112	231127	231115	+	YCR065W	utr3	first	51.5	0.201829
III	231153	231169	231153	+	YCR065W	utr3	middle	126.667	0.496408
III	231169	231202	231170	+	YCR065W	utr3	middle	13.3333	0.0522534
III	231321	231340	231328	+	YCR065W	utr3_extended	middle	128.5	0.503592
III	231340	231362	231351	+	YCR065W	utr3_extended	last	40	0.15676
III	233121	233137	233125	+	YCR066W	utr3_extended	first	27	0.447514
III	233137	233160	233149	+	YCR066W	utr3_extended	middle	27.3333	0.453039
III	233160	233179	233161	+	YCR066W	utr3_extended	last	33	0.546961
III	237031	237053	237038	+	YCR068W	utr5	utr5	17.8667	0.503286
III	237053	237088	237067	+	YCR068W	utr5	utr5	30.2	0.850704
III	237139	237146	237139	+	YCR068W	utr5	utr5	11.3	0.31831
III	238780	238796	238791	+	YCR068W	utr3	first	24.5	0.690141
III	238942	238956	238942	+	YCR068W	utr3_extended	last	11	0.309859
III	240074	240111	240090	+	YCR069W	utr3	first	484.733	0.0886859
III	240111	240142	240131	+	YCR069W	utr3_extended	middle	4981	0.911314
III	240142	240164	240142	+	YCR069W	utr3_extended	last	447.333	0.0818432
III	248021	248046	248033	+	YCR073W-A	utr3	first	454	0.890633
III	248046	248076	248058	+	YCR073W-A	utr3	middle	18.5	0.0362923
III	248076	248111	248076	+	YCR073W-A	utr3	middle	14.75	0.0289358
III	248111	248147	248128	+	YCR073W-A	utr3_extended	last	55.75	0.109367
III	249172	249191	249182	+	YCR075W-A	coding_exon	CDS	45.5	0.154107
III	249213	249222	249220	+	YCR075W-A	utr3	first	12	0.0406435
III	249270	249292	249281	+	YCR075W-A	utr3	middle	158.5	0.536833
III	249292	249314	249293	+	YCR075W-A	utr3	middle	136.75	0.463167
III	249314	249346	249318	+	YCR075W-A	utr3	middle	56.6667	0.191928
III	249429	249458	249440	+	YCR075W-A	utr3_extended	last	13.8	0.0467401
III	254270	254286	254285	+	YCR079W	utr3_extended	first	31.25	0.402114
III	254286	254311	254298	+	YCR079W	utr3_extended	last	46.4643	0.597886
III	255195	255218	255205	+	YCR081W	coding_exon	CDS	187.833	0.247122
III	255782	255811	255795	+	YCR081W	coding_exon	CDS	16.5	0.0217081
III	255811	255839	255827	+	YCR081W	coding_exon	CDS	16.2	0.0213135
III	255951	255968	255956	+	YCR081W	coding_exon	CDS	12.3333	0.0162263
III	258705	258728	258718	+	YCR081W	utr3	first	25.6667	0.0337682
III	259241	259259	259248	+	YCR081W	utr3_extended	middle	45.3333	0.0596426
III	259343	259378	259361	+	YCR081W	utr3_extended	last	714.75	0.940357
III	259378	259408	259378	+	YCR082W	utr3	first	189.5	0.190309
III	259408	259441	259421	+	YCR082W	utr3_extended	middle	682.25	0.685162
III	259441	259471	259460	+	YCR082W	utr3_extended	middle	313.5	0.314838
III	259471	259493	259472	+	YCR082W	utr3_extended	last	15.9286	0.0159966
III	259979	259995	259993	+	YCR083W	utr3	first	10.5	0.263048
III	260074	260094	260083	+	YCR083W	utr3_extended	middle	26.25	0.65762
III	260094	260116	260105	+	YCR083W	utr3_extended	last	13.6667	0.34238
III	263202	263214	263213	+	YCR085W	coding_exon	CDS	20.5	NA
III	263214	263237	263226	+	YCR085W	coding_exon	CDS	35.8333	NA
III	264006	264026	264015	+	YCR086W	utr3	single	1078.5	1
III	266892	266914	266908	+	YCR088W	utr3	first	77.125	0.00761465
III	266914	266938	266925	+	YCR088W	utr3	middle	1281	0.126475
III	266938	266963	266950	+	YCR088W	utr3	middle	160.483	0.0158447
III	266963	266989	266975	+	YCR088W	utr3_extended	middle	8847.5	0.873525
III	266989	267012	266989	+	YCR088W	utr3_extended	last	67.3333	0.00664791
III	267257	267296	267275	+	YCR089W	utr5	utr5	38.3333	NA
III	269790	269800	269790	+	YCR089W	coding_exon	CDS	26.3333	NA
III	269861	269885	269873	+	YCR089W	coding_exon	CDS	29.3333	NA
III	269885	269904	269893	+	YCR089W	coding_exon	CDS	18.5	NA
III	270614	270626	270617	+	YCR089W	coding_exon	CDS	14.3333	NA
III	270937	270962	270956	+	YCR089W	coding_exon	CDS	23.1667	NA
III	270974	270992	270984	+	YCR089W	coding_exon	CDS	121.5	NA
III	271028	271043	271028	+	YCR089W	coding_exon	CDS	10.5	NA
III	271436	271457	271436	+	YCR089W	coding_exon	CDS	15	NA
III	272311	272330	272319	+	YCR089W	utr3_extended	single	385.167	1
III	275888	275902	275893	+	YCR091W	coding_exon	CDS	21.3333	0.0823681
III	276793	276805	276798	+	YCR091W	utr3	first	25	0.0965251
III	276978	277010	276993	+	YCR091W	utr3	middle	11.5	0.0444015
III	277010	277030	277026	+	YCR091W	utr3	middle	234	0.903475
III	277233	277249	277238	+	YCR091W	utr3_extended	middle	12.1667	0.0469755
III	277278	277289	277278	+	YCR091W	utr3_extended	middle	12.9	0.0498069
III	277289	277302	277299	+	YCR091W	utr3_extended	middle	13.1667	0.0508366
III	277349	277378	277359	+	YCR091W	utr3_extended	last	21.8333	0.0842986
III	280321	280335	280330	+	YCR093W	coding_exon	CDS	39.3333	0.0759087
III	280335	280360	280348	+	YCR093W	coding_exon	CDS	221.767	0.427983
III	280360	280385	280371	+	YCR093W	coding_exon	CDS	141.267	0.272628
III	280385	280409	280385	+	YCR093W	coding_exon	CDS	33.1667	0.0640077
III	281528	281557	281546	+	YCR093W	coding_exon	CDS	70.5	0.136057
III	281966	281996	281979	+	YCR093W	coding_exon	CDS	165	0.31843
III	281996	282024	282012	+	YCR093W	coding_exon	CDS	60.5	0.116758
III	282024	282046	282035	+	YCR093W	coding_exon	CDS	41.5	0.0800901
III	282069	282086	282075	+	YCR093W	coding_exon	CDS	27.6667	0.0533934
III	282086	282102	282095	+	YCR093W	coding_exon	CDS	11	0.0212287
III	282228	282250	282237	+	YCR093W	coding_exon	CDS	23.5	0.0453522
III	282609	282634	282624	+	YCR093W	coding_exon	CDS	98.6667	0.190415
III	282672	282704	282689	+	YCR093W	coding_exon	CDS	13.5	0.0260534
III	282815	282846	282834	+	YCR093W	coding_exon	CDS	17.6667	0.0340946
III	283334	283357	283351	+	YCR093W	coding_exon	CDS	12.3333	0.0238019
III	284581	284591	284587	+	YCR093W	coding_exon	CDS	26	0.0501769
III	284863	284876	284874	+	YCR093W	coding_exon	CDS	34.25	0.0660984
III	284876	284899	284887	+	YCR093W	coding_exon	CDS	131	0.252814
III	284899	284921	284910	+	YCR093W	coding_exon	CDS	70.4	0.135864
III	284921	284943	284921	+	YCR093W	coding_exon	CDS	10.4	0.0200708
III	285169	285188	285176	+	YCR093W	coding_exon	CDS	10.8333	0.020907
III	285188	285209	285199	+	YCR093W	coding_exon	CDS	83.5	0.161145
III	285322	285333	285324	+	YCR093W	coding_exon	CDS	11.5	0.0221936
III	285441	285453	285448	+	YCR093W	coding_exon	CDS	15.8667	0.0306208
III	285453	285477	285465	+	YCR093W	coding_exon	CDS	81	0.15632
III	285477	285507	285489	+	YCR093W	coding_exon	CDS	12.5	0.0241235
III	285541	285562	285551	+	YCR093W	coding_exon	CDS	12.5	0.0241235
III	285587	285596	285587	+	YCR093W	coding_exon	CDS	15.4	0.0297202
III	285832	285843	285832	+	YCR093W	coding_exon	CDS	11.8333	0.0228369
III	286282	286315	286294	+	YCR093W	coding_exon	CDS	24.5	0.0472821
III	286501	286532	286526	+	YCR093W	utr3_extended	first	28.6667	0.0553233
III	286532	286554	286543	+	YCR093W	utr3_extended	middle	440.333	0.849791
III	286554	286569	286557	+	YCR093W	utr3_extended	last	77.8333	0.150209
III	287999	288024	288004	+	YCR094W	utr3	first	520.117	0.223759
III	288024	288055	288044	+	YCR094W	utr3	middle	69.4333	0.0298709
III	288200	288221	288210	+	YCR094W	utr3_extended	last	1804.33	0.776241
III	294278	294302	294295	+	YCR097W	coding_exon	CDS	19.5833	0.0122381
III	294302	294326	294314	+	YCR097W	coding_exon	CDS	51.25	0.0320272
III	294326	294349	294337	+	YCR097W	utr3	first	361.7	0.226034
III	294349	294373	294360	+	YCR097W	utr3	last	1238.5	0.773966
III	308247	308257	308252	+	YCR104W	utr3	single	59.5	1
III	310177	310196	310185	+	YCR105W	utr3	first	22.4	0.186667
III	310196	310217	310206	+	YCR105W	utr3	middle	44.1667	0.368056
III	310272	310302	310285	+	YCR105W	utr3	last	75.8333	0.631944
III	312813	312824	312818	+	YCR106W	coding_exon	CDS	12.6667	NA
III	312824	312854	312835	+	YCR106W	coding_exon	CDS	46.5	NA
III	313771	313802	313783	+	YCR107W	utr5	utr5	50.5833	1.65847
III	313802	313839	313820	+	YCR107W	utr5	utr5	27.9286	0.915691
III	313882	313890	313882	+	YCR107W	utr5	utr5	11	0.360656
III	314518	314531	314525	+	YCR107W	coding_exon	CDS	13.8333	0.453552
III	314909	314940	314926	+	YCR107W	coding_exon	CDS	63.1667	2.07104
III	315056	315076	315056	+	YCR107W	utr3	first	18.6667	0.612022
III	315205	315207	315205	+	YCR107W	utr3_extended	middle	10.5	0.344262
III	315261	315268	315265	+	YCR107W	utr3_extended	last	11.8333	0.387978
IV	3563	3581	3568	+	YDL248W	utr3_extended	single	20	1
IV	3812	3827	3824	+	YDL247W-A	coding_exon	CDS	15.3333	NA
IV	20586	20609	20593	+	YDL241W	utr5	utr5	206.667	0.066787
IV	20962	20999	20978	+	YDL241W	coding_exon	CDS	35.25	0.0113915
IV	20999	21037	21020	+	YDL241W	utr3	first	2026.17	0.654781
IV	21037	21064	21053	+	YDL241W	utr3	middle	409.333	0.132281
IV	21064	21085	21070	+	YDL241W	utr3	middle	305	0.0985646
IV	21085	21109	21096	+	YDL241W	utr3	middle	228.833	0.0739504
IV	21109	21132	21112	+	YDL241W	utr3	middle	46.25	0.0149463
IV	21132	21158	21142	+	YDL241W	utr3	middle	91.7333	0.0296448
IV	21158	21186	21174	+	YDL241W	utr3	middle	51.0667	0.0165028
IV	21243	21265	21254	+	YDL241W	utr3	middle	1068.25	0.345219
IV	21265	21286	21271	+	YDL241W	utr3_extended	middle	34.9167	0.0112838
IV	21286	21315	21296	+	YDL241W	utr3_extended	middle	130.833	0.0422805
IV	21315	21345	21334	+	YDL241W	utr3_extended	middle	793.25	0.256349
IV	21395	21409	21397	+	YDL241W	utr3_extended	middle	96	0.0310236
IV	21409	21432	21425	+	YDL241W	utr3_extended	middle	80.1667	0.0259069
IV	21432	21463	21442	+	YDL241W	utr3_extended	middle	211.833	0.0684566
IV	21573	21591	21577	+	YDL241W	utr3_extended	last	19.6667	0.00635553
IV	24142	24153	24146	+	YDL240W	coding_exon	CDS	11	0.0348653
IV	25901	25919	25907	+	YDL240W	utr3	first	71.5	0.226624
IV	26071	26088	26078	+	YDL240W	utr3_extended	middle	11.0833	0.0351294
IV	26106	26133	26114	+	YDL240W	utr3_extended	middle	225.5	0.714739
IV	26133	26163	26152	+	YDL240W	utr3_extended	middle	90	0.285261
IV	26163	26185	26174	+	YDL240W	utr3_extended	last	41.6667	0.132066
IV	31895	31921	31907	+	YDL237W	utr3	first	754.333	0.498788
IV	31921	31947	31921	+	YDL237W	utr3	middle	272.5	0.180185
IV	31947	31975	31959	+	YDL237W	utr3_extended	middle	551.833	0.364889
IV	31975	32001	31995	+	YDL237W	utr3_extended	middle	383.5	0.253582
IV	32001	32022	32011	+	YDL237W	utr3_extended	middle	758	0.501212
IV	32022	32047	32030	+	YDL237W	utr3_extended	middle	634.333	0.41944
IV	32047	32075	32048	+	YDL237W	utr3_extended	middle	68.5	0.0452942
IV	32075	32103	32089	+	YDL237W	utr3_extended	middle	12.3333	0.00815517
IV	32103	32129	32117	+	YDL237W	utr3_extended	last	185.333	0.122548
IV	33357	33394	33373	+	YDL236W	utr3	first	1129.67	0.0945684
IV	33394	33431	33415	+	YDL236W	utr3	middle	10815.8	0.905432
IV	33431	33465	33431	+	YDL236W	utr3	last	398.667	0.0333738
IV	38332	38354	38339	+	YDL233W	utr3_extended	first	633.5	0.942708
IV	38354	38382	38368	+	YDL233W	utr3_extended	middle	27.2667	0.0405754
IV	38382	38409	38395	+	YDL233W	utr3_extended	middle	26.4167	0.0393105
IV	38409	38436	38423	+	YDL233W	utr3_extended	last	38.5	0.0572917
IV	38765	38787	38783	+	YDL232W	utr3	first	21.0833	0.0091823
IV	38787	38812	38798	+	YDL232W	utr3	middle	313	0.136319
IV	38812	38837	38829	+	YDL232W	utr3	middle	163.833	0.0713534
IV	38837	38864	38848	+	YDL232W	utr3_extended	middle	794.083	0.345843
IV	38864	38901	38880	+	YDL232W	utr3_extended	last	1502	0.654157
IV	43722	43754	43742	+	YDL230W	utr3_extended	first	1753.67	0.708743
IV	43754	43778	43765	+	YDL230W	utr3_extended	last	720.667	0.291257
IV	45957	45987	45967	+	YDL229W	utr3	first	2706.8	0.259613
IV	45987	46021	46007	+	YDL229W	utr3	middle	7719.5	0.740387
IV	46021	46041	46027	+	YDL229W	utr3	last	169.25	0.016233
IV	54145	54173	54171	+	YDL225W	utr3	first	82	0.0368236
IV	54173	54195	54184	+	YDL225W	utr3	middle	2102.17	0.944016
IV	54195	54219	54202	+	YDL225W	utr3	middle	124.667	0.0559838
IV	54219	54237	54224	+	YDL225W	utr3_extended	middle	55.8333	0.025073
IV	54264	54281	54264	+	YDL225W	utr3_extended	last	17.9167	0.0080458
IV	62521	62544	62539	+	YDL221W	coding_exon	CDS	51.9167	NA
IV	65807	65840	65825	+	YDL219W	utr3_extended	first	606.417	0.855384
IV	65840	65865	65854	+	YDL219W	utr3_extended	middle	58.7	0.0827996
IV	65865	65876	65868	+	YDL219W	utr3_extended	middle	29.8333	0.0420816
IV	66022	66046	66041	+	YDL219W	utr3_extended	last	102.524	0.144616
IV	79183	79215	79202	+	YDL212W	utr3_extended	first	3453.35	0.958372
IV	79215	79241	79215	+	YDL212W	utr3_extended	last	150	0.0416279
IV	86069	86094	86074	+	YDL210W	utr3	single	12.5	1
IV	88108	88131	88119	+	YDL208W	utr3_extended	first	8867	0.845846
IV	88131	88158	88134	+	YDL208W	utr3_extended	last	1616	0.154154
IV	88209	88242	88221	+	YDL207W	utr5	utr5	62	0.0417696
IV	89643	89663	89657	+	YDL207W	coding_exon	CDS	13.75	0.00926342
IV	89905	89924	89921	+	YDL207W	utr3	first	54.8333	0.0369414
IV	89924	89948	89937	+	YDL207W	utr3	middle	1429.5	0.963059
IV	89948	89959	89948	+	YDL207W	utr3	last	17	0.011453
IV	90050	90080	90068	+	YDL206W	utr5	utr5	27.5	0.0983607
IV	90672	90681	90677	+	YDL206W	coding_exon	CDS	10	0.0357675
IV	91813	91840	91823	+	YDL206W	coding_exon	CDS	12.6667	0.0453055
IV	91922	91955	91950	+	YDL206W	coding_exon	CDS	63.6667	0.22772
IV	91955	91983	91970	+	YDL206W	coding_exon	CDS	34	0.12161
IV	92047	92075	92063	+	YDL206W	coding_exon	CDS	12.3333	0.0441133
IV	92455	92478	92477	+	YDL206W	utr3	first	35.5833	0.127273
IV	92478	92498	92489	+	YDL206W	utr3_extended	middle	244	0.872727
IV	92695	92718	92708	+	YDL206W	utr3_extended	last	10.8333	0.0387481
IV	94563	94591	94575	+	YDL204W	utr5	utr5	122.833	NA
IV	94591	94617	94591	+	YDL204W	utr5	utr5	10.3333	NA
IV	94617	94640	94636	+	YDL204W	coding_exon	CDS	12.1667	NA
IV	94640	94673	94653	+	YDL204W	coding_exon	CDS	14.9167	NA
IV	95960	95983	95964	+	YDL204W	utr3_extended	single	59	1
IV	99283	99311	99288	+	YDL202W	utr3	first	11.2143	0.013664
IV	99311	99352	99334	+	YDL202W	utr3	middle	48.9167	0.0596024
IV	99352	99383	99369	+	YDL202W	utr3_extended	last	771.8	0.940398
IV	100445	100465	100462	+	YDL201W	utr3	first	293	0.122229
IV	100465	100489	100475	+	YDL201W	utr3_extended	middle	1350.8	0.563506
IV	100489	100516	100503	+	YDL201W	utr3_extended	middle	1046.33	0.436494
IV	100516	100545	100529	+	YDL201W	utr3_extended	last	39.3333	0.0164085
IV	107232	107254	107243	+	YDL196W	utr3_extended	single	14.8333	1
IV	109402	109417	109412	+	YDL195W	coding_exon	CDS	78	0.0873982
IV	109527	109537	109530	+	YDL195W	coding_exon	CDS	25.5	0.0285725
IV	109758	109780	109771	+	YDL195W	coding_exon	CDS	40.5	0.0453798
IV	109889	109913	109896	+	YDL195W	coding_exon	CDS	33.3333	0.0373497
IV	110248	110270	110259	+	YDL195W	coding_exon	CDS	24.8333	0.0278255
IV	110300	110321	110313	+	YDL195W	coding_exon	CDS	23.6667	0.0265183
IV	111134	111145	111137	+	YDL195W	utr3_extended	first	37.4167	0.041925
IV	111145	111172	111170	+	YDL195W	utr3_extended	middle	558.5	0.625794
IV	111172	111202	111189	+	YDL195W	utr3_extended	middle	333.967	0.374206
IV	111202	111226	111203	+	YDL195W	utr3_extended	last	206.5	0.231381
IV	112735	112756	112745	+	YDL194W	coding_exon	CDS	14.1667	0.345528
IV	112782	112809	112797	+	YDL194W	coding_exon	CDS	33.3333	0.813008
IV	114272	114297	114294	+	YDL194W	utr3	first	11.9167	0.29065
IV	114297	114321	114308	+	YDL194W	utr3	middle	26.6667	0.650407
IV	114383	114399	114383	+	YDL194W	utr3	last	14.3333	0.349593
IV	115924	115935	115930	+	YDL193W	utr3	first	62.8333	0.102418
IV	115935	115958	115945	+	YDL193W	utr3	middle	433	0.705786
IV	115958	115984	115962	+	YDL193W	utr3	middle	86.25	0.140587
IV	115984	116009	115998	+	YDL193W	utr3	middle	180.5	0.294214
IV	116009	116040	116009	+	YDL193W	utr3	middle	57.5	0.0937245
IV	116040	116073	116060	+	YDL193W	utr3_extended	last	80.8333	0.131758
IV	116899	116926	116921	+	YDL192W	utr3	first	697.5	0.186262
IV	116926	116958	116937	+	YDL192W	utr3	middle	1557	0.415786
IV	116958	116996	116978	+	YDL192W	utr3	middle	1991.87	0.531914
IV	116996	117025	117014	+	YDL192W	utr3	middle	1752.85	0.468086
IV	117047	117072	117066	+	YDL192W	utr3	middle	76.5	0.0204288
IV	117072	117100	117084	+	YDL192W	utr3	middle	151.083	0.0403457
IV	117100	117127	117115	+	YDL192W	utr3	middle	606.167	0.161873
IV	117127	117160	117139	+	YDL192W	utr3	middle	410.333	0.109577
IV	117402	117423	117406	+	YDL192W	utr3_extended	last	97.6667	0.0260812
IV	118557	118584	118573	+	YDL191W	utr3_extended	first	6835.83	0.627121
IV	118584	118605	118600	+	YDL191W	utr3_extended	middle	442.483	0.0405936
IV	118605	118627	118615	+	YDL191W	utr3_extended	middle	4064.5	0.372879
IV	118627	118649	118627	+	YDL191W	utr3_extended	middle	484.7	0.0444665
IV	118649	118676	118660	+	YDL191W	utr3_extended	middle	292.083	0.0267958
IV	118676	118706	118691	+	YDL191W	utr3_extended	last	345.333	0.031681
IV	123328	123358	123346	+	YDL189W	coding_exon	CDS	29.8333	0.0259045
IV	123646	123670	123666	+	YDL189W	utr3_extended	first	179.667	0.156006
IV	123670	123693	123682	+	YDL189W	utr3_extended	middle	972	0.843994
IV	123693	123715	123693	+	YDL189W	utr3_extended	last	56.6762	0.0492123
IV	126840	126852	126848	+	YDL185W	coding_exon	CDS	14.3333	0.0246111
IV	126866	126898	126877	+	YDL185W	coding_exon	CDS	25.5	0.0437849
IV	126915	126954	126934	+	YDL185W	coding_exon	CDS	19.5	0.0334826
IV	126990	126999	126997	+	YDL185W	coding_exon	CDS	10	0.0171705
IV	128668	128674	128668	+	YDL185W	coding_exon	CDS	11	0.0188876
IV	128799	128831	128817	+	YDL185W	coding_exon	CDS	15.8333	0.0271867
IV	128831	128866	128845	+	YDL185W	coding_exon	CDS	10.1429	0.0174158
IV	129068	129081	129079	+	YDL185W	coding_exon	CDS	14.0833	0.0241818
IV	129081	129101	129094	+	YDL185W	coding_exon	CDS	36.1667	0.0621001
IV	129185	129198	129186	+	YDL185W	coding_exon	CDS	16.8333	0.0289037
IV	129198	129226	129210	+	YDL185W	coding_exon	CDS	39.3333	0.0675375
IV	129551	129573	129561	+	YDL185W	coding_exon	CDS	11	0.0188876
IV	130017	130057	130036	+	YDL185W	utr3	first	394.5	0.677378
IV	130057	130092	130077	+	YDL185W	utr3	middle	90.2381	0.154944
IV	130092	130118	130106	+	YDL185W	utr3	middle	187.893	0.322622
IV	130118	130148	130122	+	YDL185W	utr3_extended	middle	112.333	0.192882
IV	130148	130179	130167	+	YDL185W	utr3_extended	middle	168.667	0.28961
IV	130179	130204	130179	+	YDL185W	utr3_extended	middle	39.6667	0.0681098
IV	130204	130228	130216	+	YDL185W	utr3_extended	middle	66.0833	0.113469
IV	130258	130269	130258	+	YDL185W	utr3_extended	middle	10	0.0171705
IV	130269	130287	130280	+	YDL185W	utr3_extended	middle	21.5	0.0369167
IV	130299	130323	130301	+	YDL185W	utr3_extended	middle	114.833	0.197175
IV	130323	130358	130345	+	YDL185W	utr3_extended	last	101.5	0.174281
IV	133465	133507	133486	+	YDL182W	coding_exon	CDS	17.3333	NA
IV	134809	134825	134814	+	YDL182W	utr3	single	791	1
IV	135533	135560	135544	+	YDL181W	utr3	single	1240.17	1
IV	137375	137397	137383	+	YDL180W	coding_exon	CDS	14.5	0.00854197
IV	137548	137576	137565	+	YDL180W	utr3	first	1136	0.669219
IV	137576	137597	137582	+	YDL180W	utr3	middle	555.667	0.327344
IV	137597	137619	137601	+	YDL180W	utr3	middle	561.5	0.330781
IV	137619	137641	137630	+	YDL180W	utr3	middle	40.1333	0.0236426
IV	137641	137662	137647	+	YDL180W	utr3	middle	25.8333	0.0152185
IV	137683	137710	137694	+	YDL180W	utr3_extended	last	31.1167	0.0183309
IV	139233	139267	139253	+	YDL179W	utr3_extended	first	60.8333	0.0786808
IV	139267	139292	139281	+	YDL179W	utr3_extended	middle	17.8333	0.0230653
IV	139292	139314	139302	+	YDL179W	utr3_extended	middle	160	0.206941
IV	139340	139377	139356	+	YDL179W	utr3_extended	middle	359.833	0.465402
IV	139377	139417	139397	+	YDL179W	utr3_extended	middle	413.333	0.534598
IV	139417	139453	139437	+	YDL179W	utr3_extended	middle	24.1167	0.0311921
IV	139453	139478	139468	+	YDL179W	utr3_extended	last	25.25	0.0326579
IV	141160	141175	141174	+	YDL178W	utr3_extended	first	328.5	0.0836162
IV	141175	141200	141189	+	YDL178W	utr3_extended	middle	3600.17	0.916384
IV	141200	141221	141209	+	YDL178W	utr3_extended	last	82.75	0.0210631
IV	142938	142958	142947	+	YDL176W	coding_exon	CDS	30.5	0.0480189
IV	144315	144344	144333	+	YDL176W	utr3_extended	first	538.333	0.847547
IV	144344	144361	144353	+	YDL176W	utr3_extended	last	96.8333	0.152453
IV	148770	148776	148770	+	YDL173W	coding_exon	CDS	32	0.370871
IV	149089	149104	149092	+	YDL173W	utr3	first	26.45	0.306548
IV	149190	149215	149203	+	YDL173W	utr3_extended	last	59.8333	0.693452
IV	157956	157974	157961	+	YDL170W	utr3	first	37.25	0.202813
IV	157974	157987	157986	+	YDL170W	utr3	middle	23	0.125227
IV	158023	158037	158023	+	YDL170W	utr3_extended	middle	24.5	0.133394
IV	158037	158070	158050	+	YDL170W	utr3_extended	middle	130.333	0.709619
IV	158070	158091	158089	+	YDL170W	utr3_extended	last	53.3333	0.290381
IV	160795	160827	160815	+	YDL168W	utr3	first	2925.17	0.941982
IV	160827	160858	160835	+	YDL168W	utr3	middle	48	0.0154573
IV	160858	160892	160876	+	YDL168W	utr3	middle	180.167	0.0580185
IV	160951	160978	160966	+	YDL168W	utr3	last	58.5	0.0188386
IV	164886	164913	164902	+	YDL165W	utr3	first	4191.92	0.965453
IV	164913	164936	164915	+	YDL165W	utr3	middle	109.333	0.0251809
IV	165379	165392	165390	+	YDL165W	utr3_extended	last	150	0.034547
IV	169170	169192	169181	+	YDL161W	utr3	first	5240.67	0.921414
IV	169192	169214	169198	+	YDL161W	utr3	middle	446.967	0.0785857
IV	169256	169268	169261	+	YDL161W	utr3_extended	middle	39.8333	0.0070035
IV	169300	169323	169309	+	YDL161W	utr3_extended	last	33.25	0.00584602
IV	173278	173300	173293	+	YDL159W	coding_exon	CDS	27.1667	0.210949
IV	173300	173325	173312	+	YDL159W	coding_exon	CDS	251.4	1.95212
IV	174060	174087	174071	+	YDL159W	utr3_extended	first	11.5	0.0892973
IV	174135	174165	174149	+	YDL159W	utr3_extended	middle	104.333	0.810146
IV	174165	174196	174167	+	YDL159W	utr3_extended	last	24.45	0.189854
IV	177141	177144	177143	+	YDL156W	utr3_extended	single	11.5	1
IV	177416	177435	177424	+	YDL155W	coding_exon	CDS	38	0.0476838
IV	177463	177482	177473	+	YDL155W	coding_exon	CDS	86.3333	0.108334
IV	177573	177597	177586	+	YDL155W	coding_exon	CDS	49.2	0.0617379
IV	177646	177651	177646	+	YDL155W	coding_exon	CDS	13.5	0.0169403
IV	178172	178197	178184	+	YDL155W	utr3_extended	first	757.417	0.950434
IV	178197	178220	178209	+	YDL155W	utr3_extended	last	39.5	0.049566
IV	178220	178240	178225	+	YDL154W	utr5	utr5	16.5	0.0621664
IV	178240	178262	178249	+	YDL154W	utr5	utr5	21.9524	0.0827091
IV	178262	178286	178275	+	YDL154W	utr5	utr5	64	0.24113
IV	178286	178308	178292	+	YDL154W	utr5	utr5	13.2	0.0497331
IV	181093	181133	181112	+	YDL154W	utr3	first	201.167	0.757928
IV	181133	181170	181153	+	YDL154W	utr3	middle	51.1667	0.192779
IV	181194	181213	181212	+	YDL154W	utr3	middle	32.4167	0.122135
IV	181213	181241	181224	+	YDL154W	utr3	last	64.25	0.242072
IV	183400	183424	183418	+	YDL152W	utr3_extended	single	10.5	1
IV	184633	184653	184635	+	YDL150W	utr3	first	13.3333	0.00994406
IV	184653	184682	184680	+	YDL150W	utr3_extended	middle	91.5	0.0682411
IV	184682	184704	184693	+	YDL150W	utr3_extended	middle	1110	0.827843
IV	184704	184725	184705	+	YDL150W	utr3_extended	middle	209.4	0.156172
IV	184725	184754	184735	+	YDL150W	utr3_extended	last	230.833	0.172157
IV	185916	185933	185932	+	YDL149W	coding_exon	CDS	41	0.320521
IV	186045	186072	186057	+	YDL149W	coding_exon	CDS	24	0.187622
IV	187676	187701	187686	+	YDL149W	coding_exon	CDS	50.3333	0.393485
IV	187974	187994	187977	+	YDL149W	utr3_extended	first	89.25	0.69772
IV	188007	188022	188014	+	YDL149W	utr3_extended	middle	38.6667	0.30228
IV	188052	188064	188058	+	YDL149W	utr3_extended	last	21.75	0.170033
IV	192387	192417	192406	+	YDL147W	utr3_extended	single	19175.8	1
IV	192642	192661	192647	+	YDL146W	utr5	utr5	13.5833	0.0582559
IV	192680	192694	192687	+	YDL146W	utr5	utr5	10.6667	0.045747
IV	193669	193688	193669	+	YDL146W	coding_exon	CDS	19.8333	0.0850608
IV	193688	193718	193706	+	YDL146W	coding_exon	CDS	84.1667	0.360972
IV	193718	193743	193729	+	YDL146W	coding_exon	CDS	27.6667	0.118656
IV	193743	193770	193756	+	YDL146W	coding_exon	CDS	26.3333	0.112938
IV	194098	194125	194116	+	YDL146W	coding_exon	CDS	18.25	0.0782702
IV	194125	194157	194136	+	YDL146W	coding_exon	CDS	329.067	1.41129
IV	194243	194262	194245	+	YDL146W	utr3	first	64.6667	0.277341
IV	194262	194298	194279	+	YDL146W	utr3	middle	118.667	0.508935
IV	194336	194362	194342	+	YDL146W	utr3	middle	37.9833	0.162902
IV	194362	194395	194382	+	YDL146W	utr3	middle	114.5	0.491065
IV	194395	194414	194400	+	YDL146W	utr3	middle	48.1	0.20629
IV	194426	194436	194431	+	YDL146W	utr3_extended	middle	44.8333	0.19228
IV	194551	194567	194551	+	YDL146W	utr3_extended	last	11	0.0471766
IV	201033	201059	201040	+	YDL143W	coding_exon	CDS	10.5	0.051726
IV	201094	201117	201112	+	YDL143W	coding_exon	CDS	52.3333	0.257809
IV	201117	201146	201128	+	YDL143W	coding_exon	CDS	121.583	0.598954
IV	201175	201182	201176	+	YDL143W	coding_exon	CDS	50.5	0.248777
IV	201665	201690	201679	+	YDL143W	utr3_extended	first	117.743	0.580034
IV	201712	201735	201724	+	YDL143W	utr3_extended	middle	17.5	0.0862099
IV	201735	201756	201743	+	YDL143W	utr3_extended	middle	11.8667	0.0584585
IV	201819	201846	201833	+	YDL143W	utr3_extended	middle	85.25	0.419966
IV	201860	201865	201861	+	YDL143W	utr3_extended	last	31	0.152715
IV	204675	204695	204677	+	YDL141W	coding_exon	CDS	431	1.62081
IV	204695	204724	204713	+	YDL141W	coding_exon	CDS	249.333	0.937637
IV	204724	204748	204725	+	YDL141W	coding_exon	CDS	24.75	0.0930743
IV	204773	204791	204785	+	YDL141W	coding_exon	CDS	13	0.0488875
IV	205059	205088	205077	+	YDL141W	coding_exon	CDS	47.3333	0.178001
IV	205165	205188	205183	+	YDL141W	utr3	first	13.8333	0.0520213
IV	205208	205231	205217	+	YDL141W	utr3_extended	middle	21.5	0.0808524
IV	205246	205281	205261	+	YDL141W	utr3_extended	middle	45.3333	0.170479
IV	205281	205313	205301	+	YDL141W	utr3_extended	middle	59.4167	0.223441
IV	205313	205342	205313	+	YDL141W	utr3_extended	middle	19	0.071451
IV	205342	205372	205359	+	YDL141W	utr3_extended	middle	206.5	0.776559
IV	205372	205390	205373	+	YDL141W	utr3_extended	last	40	0.150423
IV	214488	214515	214504	+	YDL138W	coding_exon	CDS	10.3333	0.0558659
IV	214515	214542	214526	+	YDL138W	coding_exon	CDS	14.1667	0.0765904
IV	214718	214740	214720	+	YDL138W	coding_exon	CDS	29	0.156785
IV	215657	215668	215659	+	YDL138W	utr3	first	10.5	0.056767
IV	215691	215717	215710	+	YDL138W	utr3	middle	27.25	0.147324
IV	215717	215738	215727	+	YDL138W	utr3	middle	98.3333	0.531627
IV	215738	215769	215743	+	YDL138W	utr3	middle	86.6333	0.468373
IV	215769	215800	215789	+	YDL138W	utr3	middle	79.5	0.429807
IV	215800	215819	215803	+	YDL138W	utr3	last	11.3333	0.0612723
IV	217110	217138	217124	+	YDL137W	utr3	first	675	0.0700728
IV	217190	217214	217203	+	YDL137W	utr3	middle	4928.5	0.511636
IV	217214	217236	217225	+	YDL137W	utr3_extended	middle	4704.33	0.488364
IV	217257	217278	217267	+	YDL137W	utr3_extended	middle	1346.5	0.139782
IV	217278	217295	217282	+	YDL137W	utr3_extended	middle	335.214	0.0347991
IV	217308	217324	217313	+	YDL137W	utr3_extended	last	201.5	0.020918
IV	218414	218436	218428	+	YDL136W	utr3_extended	first	336.083	0.0379052
IV	218436	218458	218446	+	YDL136W	utr3_extended	middle	6908.92	0.779223
IV	218458	218482	218458	+	YDL136W	utr3_extended	middle	1334	0.150455
IV	218482	218506	218495	+	YDL136W	utr3_extended	middle	1957.5	0.220777
IV	218506	218535	218511	+	YDL136W	utr3_extended	last	481.667	0.0543248
IV	223769	223792	223780	+	YDL133W	utr3	first	153.833	0.0250834
IV	223792	223820	223799	+	YDL133W	utr3	middle	151.214	0.0246563
IV	223820	223854	223836	+	YDL133W	utr3	last	5979.05	0.974917
IV	224468	224486	224485	+	YDL132W	coding_exon	CDS	13	0.013386
IV	224486	224511	224502	+	YDL132W	coding_exon	CDS	37.5	0.0386134
IV	225053	225069	225056	+	YDL132W	coding_exon	CDS	51.5	0.053029
IV	225668	225700	225681	+	YDL132W	coding_exon	CDS	81.5	0.0839197
IV	225700	225725	225719	+	YDL132W	coding_exon	CDS	10.25	0.0105543
IV	225867	225884	225880	+	YDL132W	coding_exon	CDS	18.6667	0.0192209
IV	226247	226273	226257	+	YDL132W	coding_exon	CDS	16.5	0.0169899
IV	226885	226901	226894	+	YDL132W	utr3_extended	first	60.3333	0.0621246
IV	226901	226924	226912	+	YDL132W	utr3_extended	middle	812.5	0.836623
IV	226924	226947	226924	+	YDL132W	utr3_extended	middle	158.667	0.163377
IV	226947	226969	226957	+	YDL132W	utr3_extended	last	18.1667	0.018706
IV	227407	227430	227419	+	YDL131W	coding_exon	CDS	138.833	0.0212864
IV	227430	227458	227440	+	YDL131W	coding_exon	CDS	136.833	0.0209797
IV	228753	228780	228765	+	YDL131W	utr3	first	968.667	0.148519
IV	228780	228806	228795	+	YDL131W	utr3	middle	453.367	0.0695117
IV	228806	228830	228816	+	YDL131W	utr3_extended	middle	5553.5	0.851481
IV	228830	228858	228843	+	YDL131W	utr3_extended	last	552.333	0.0846856
IV	229576	229602	229588	+	YDL130W-A	utr3	first	5747.67	0.924112
IV	229602	229627	229615	+	YDL130W-A	utr3	last	472	0.0758883
IV	230603	230632	230619	+	YDL130W	utr3_extended	first	5265.67	0.896195
IV	230632	230662	230644	+	YDL130W	utr3_extended	last	609.917	0.103805
IV	232104	232130	232116	+	YDL129W	utr3	first	17.1667	0.407115
IV	232292	232307	232296	+	YDL129W	utr3_extended	last	25	0.592885
IV	232922	232952	232938	+	YDL128W	coding_exon	CDS	38.3333	0.0372953
IV	233764	233781	233773	+	YDL128W	coding_exon	CDS	20.25	0.0197016
IV	233808	233825	233820	+	YDL128W	coding_exon	CDS	13.5	0.0131344
IV	233838	233858	233842	+	YDL128W	coding_exon	CDS	31.1429	0.0302995
IV	233898	233916	233910	+	YDL128W	utr3	first	21.25	0.0206746
IV	233916	233937	233928	+	YDL128W	utr3	middle	47.5	0.0462137
IV	233963	233974	233963	+	YDL128W	utr3	middle	10.75	0.0104589
IV	233974	233996	233987	+	YDL128W	utr3	middle	23.3333	0.0227015
IV	233996	234028	234007	+	YDL128W	utr3	middle	776	0.754986
IV	234028	234063	234048	+	YDL128W	utr3_extended	middle	251.833	0.245014
IV	234063	234091	234078	+	YDL128W	utr3_extended	last	125.633	0.122231
IV	234867	234895	234882	+	YDL127W	utr5	utr5	16.75	0.0227016
IV	234895	234925	234907	+	YDL127W	utr5	utr5	12.6	0.017077
IV	235986	236007	236003	+	YDL127W	utr3_extended	first	23.1667	0.0313982
IV	236007	236030	236019	+	YDL127W	utr3_extended	middle	714.667	0.968602
IV	236030	236045	236039	+	YDL127W	utr3_extended	last	15.25	0.0206686
IV	241219	241251	241250	+	YDL124W	utr3_extended	first	69	0.0206186
IV	241251	241280	241268	+	YDL124W	utr3_extended	middle	3231.5	0.965636
IV	241280	241300	241280	+	YDL124W	utr3_extended	last	115	0.0343643
IV	241455	241466	241455	+	YDL123W	coding_exon	CDS	16.5	0.170128
IV	241480	241489	241482	+	YDL123W	coding_exon	CDS	15	0.154662
IV	242158	242163	242158	+	YDL123W	utr3	first	10.5	0.108263
IV	242301	242330	242327	+	YDL123W	utr3	middle	36.3857	0.375166
IV	242330	242346	242340	+	YDL123W	utr3	last	60.6	0.624834
IV	243924	243946	243935	+	YDL122W	coding_exon	CDS	105.667	0.153604
IV	243946	243975	243956	+	YDL122W	coding_exon	CDS	53.5	0.077771
IV	244914	244934	244920	+	YDL122W	coding_exon	CDS	98	0.142459
IV	244934	244961	244947	+	YDL122W	coding_exon	CDS	31.1667	0.0453059
IV	245004	245028	245024	+	YDL122W	utr3_extended	first	27.8333	0.0404603
IV	245028	245052	245041	+	YDL122W	utr3_extended	middle	435.5	0.633071
IV	245052	245074	245061	+	YDL122W	utr3_extended	last	252.417	0.366929
IV	246100	246131	246117	+	YDL120W	coding_exon	CDS	13.8333	0.00716691
IV	246303	246343	246325	+	YDL120W	coding_exon	CDS	32.4167	0.0167948
IV	246490	246516	246515	+	YDL120W	utr3	first	644.167	0.333736
IV	246516	246542	246528	+	YDL120W	utr3_extended	middle	1286	0.666264
IV	246542	246566	246555	+	YDL120W	utr3_extended	middle	254	0.131595
IV	246566	246588	246587	+	YDL120W	utr3_extended	middle	22.8333	0.0118297
IV	246588	246611	246600	+	YDL120W	utr3_extended	middle	372.833	0.193161
IV	246611	246636	246611	+	YDL120W	utr3_extended	middle	219.833	0.113893
IV	246636	246661	246650	+	YDL120W	utr3_extended	last	154.833	0.0802176
IV	248295	248327	248313	+	YDL117W	utr5	utr5	13.6	0.0336107
IV	250488	250509	250498	+	YDL117W	coding_exon	CDS	115	0.284208
IV	250820	250836	250830	+	YDL117W	coding_exon	CDS	54.6667	0.135102
IV	251263	251290	251287	+	YDL117W	utr3	first	11.3333	0.0280089
IV	251290	251312	251301	+	YDL117W	utr3	middle	47.8333	0.118214
IV	251312	251334	251320	+	YDL117W	utr3	middle	20.6667	0.051075
IV	251356	251380	251369	+	YDL117W	utr3_extended	middle	329.8	0.815059
IV	251380	251409	251388	+	YDL117W	utr3_extended	last	74.8333	0.184941
IV	253576	253604	253588	+	YDL116W	coding_exon	CDS	25.6667	0.0123596
IV	253779	253801	253799	+	YDL116W	utr3_extended	first	61.5833	0.0296549
IV	253801	253829	253811	+	YDL116W	utr3_extended	middle	1870	0.900482
IV	253829	253861	253846	+	YDL116W	utr3_extended	middle	206.667	0.0995185
IV	253924	253946	253935	+	YDL116W	utr3_extended	middle	15.2	0.00731942
IV	253989	254006	253989	+	YDL116W	utr3_extended	last	21.8333	0.0105136
IV	254948	254971	254955	+	YDL114W-A	coding_exon	CDS	10.8333	NA
IV	255065	255084	255076	+	YDL114W-A	utr3_extended	single	60	1
IV	259446	259466	259455	+	YDL112W	coding_exon	CDS	17.75	0.00810996
IV	259810	259836	259821	+	YDL112W	coding_exon	CDS	19.6667	0.00898568
IV	262077	262091	262080	+	YDL112W	coding_exon	CDS	47.5	0.0217027
IV	262091	262118	262094	+	YDL112W	coding_exon	CDS	28.4	0.0129759
IV	262198	262211	262207	+	YDL112W	coding_exon	CDS	13	0.00593969
IV	263229	263240	263236	+	YDL112W	utr3	first	19.5	0.00890953
IV	263240	263254	263251	+	YDL112W	utr3	middle	62.3333	0.02848
IV	263282	263315	263295	+	YDL112W	utr3_extended	middle	87.5	0.0399787
IV	263315	263346	263335	+	YDL112W	utr3_extended	middle	2044	0.933902
IV	263346	263368	263357	+	YDL112W	utr3_extended	middle	144.667	0.0660981
IV	263368	263390	263381	+	YDL112W	utr3_extended	middle	33.75	0.0154203
IV	263390	263414	263401	+	YDL112W	utr3_extended	middle	114.417	0.0522769
IV	263414	263430	263417	+	YDL112W	utr3_extended	last	62.6667	0.0286323
IV	268722	268745	268734	+	YDL108W	utr3_extended	first	2145	0.723684
IV	268745	268770	268751	+	YDL108W	utr3_extended	middle	572.667	0.193207
IV	268770	268795	268784	+	YDL108W	utr3_extended	last	819	0.276316
IV	268820	268839	268833	+	YDL107W	utr5	utr5	36.6667	0.140584
IV	270041	270065	270049	+	YDL107W	utr3	first	45.75	0.175411
IV	270065	270091	270080	+	YDL107W	utr3	middle	90.1667	0.345709
IV	270091	270112	270092	+	YDL107W	utr3	middle	31.4667	0.120647
IV	270112	270144	270123	+	YDL107W	utr3	last	170.65	0.654291
IV	273091	273109	273095	+	YDL105W	coding_exon	CDS	64.5	0.0182242
IV	273350	273361	273350	+	YDL105W	coding_exon	CDS	16.6	0.00469026
IV	273634	273655	273635	+	YDL105W	utr3	first	15.5	0.00437946
IV	273685	273701	273685	+	YDL105W	utr3_extended	middle	19	0.00536837
IV	273701	273731	273717	+	YDL105W	utr3_extended	middle	3133.25	0.885286
IV	273731	273756	273745	+	YDL105W	utr3_extended	middle	406	0.114714
IV	273756	273775	273762	+	YDL105W	utr3_extended	last	298	0.0841986
IV	278554	278563	278557	+	YDL102W	coding_exon	CDS	20.1667	0.0313472
IV	278753	278789	278772	+	YDL102W	coding_exon	CDS	35.55	0.0552591
IV	278807	278825	278814	+	YDL102W	coding_exon	CDS	19.3333	0.0300518
IV	279764	279785	279764	+	YDL102W	coding_exon	CDS	30.6667	0.0476684
IV	280091	280104	280102	+	YDL102W	coding_exon	CDS	20.5	0.0318653
IV	280273	280303	280287	+	YDL102W	utr3_extended	first	535	0.831606
IV	280303	280329	280318	+	YDL102W	utr3_extended	middle	18.3333	0.0284974
IV	280329	280357	280339	+	YDL102W	utr3_extended	middle	108.333	0.168394
IV	280357	280387	280375	+	YDL102W	utr3_extended	middle	97	0.150777
IV	280387	280404	280399	+	YDL102W	utr3_extended	last	39.5	0.061399
IV	284504	284541	284522	+	YDL099W	utr3_extended	first	2687	0.970562
IV	284541	284570	284541	+	YDL099W	utr3_extended	last	81.5	0.0294383
IV	289016	289040	289023	+	YDL095W	coding_exon	CDS	23	0.0939628
IV	289082	289095	289092	+	YDL095W	coding_exon	CDS	162	0.661825
IV	289172	289195	289178	+	YDL095W	coding_exon	CDS	69	0.281888
IV	289575	289607	289586	+	YDL095W	utr3_extended	first	35.3111	0.144258
IV	289607	289638	289627	+	YDL095W	utr3_extended	middle	68.2778	0.278938
IV	289638	289651	289639	+	YDL095W	utr3_extended	middle	18	0.0735361
IV	289664	289682	289673	+	YDL095W	utr3_extended	middle	24.9167	0.101793
IV	289701	289723	289712	+	YDL095W	utr3_extended	middle	176.5	0.721062
IV	289723	289739	289732	+	YDL095W	utr3_extended	last	61	0.249206
IV	291995	292000	291995	+	YDL093W	coding_exon	CDS	13	0.0355904
IV	292388	292417	292403	+	YDL093W	utr3_extended	first	192.75	0.527697
IV	292417	292447	292430	+	YDL093W	utr3_extended	last	172.517	0.472303
IV	293318	293350	293334	+	YDL092W	utr3_extended	first	17.8333	0.0164476
IV	293350	293390	293366	+	YDL092W	utr3_extended	middle	1020.25	0.940973
IV	293390	293425	293414	+	YDL092W	utr3_extended	last	64	0.059027
IV	297201	297222	297220	+	YDL089W	coding_exon	CDS	14	NA
IV	298329	298363	298345	+	YDL089W	utr3_extended	single	124.9	1
IV	302100	302116	302100	+	YDL086W	coding_exon	CDS	12.6667	0.135884
IV	302256	302288	302265	+	YDL086W	utr3	first	26.0833	0.279814
IV	302288	302322	302310	+	YDL086W	utr3	middle	44.8333	0.480958
IV	302411	302447	302429	+	YDL086W	utr3_extended	middle	48.3833	0.519042
IV	302447	302484	302464	+	YDL086W	utr3_extended	middle	16	0.171643
IV	302484	302518	302504	+	YDL086W	utr3_extended	last	13.8333	0.1484
IV	304922	304937	304923	+	YDL085W	utr3	single	17	1
IV	306626	306647	306643	+	YDL084W	utr3	first	15.0833	0.0283658
IV	306647	306674	306663	+	YDL084W	utr3	middle	451.143	0.848423
IV	306674	306695	306685	+	YDL084W	utr3	middle	50	0.0940304
IV	306695	306714	306705	+	YDL084W	utr3_extended	middle	80.6	0.151577
IV	306725	306743	306729	+	YDL084W	utr3_extended	middle	10.8333	0.0203733
IV	306743	306763	306757	+	YDL084W	utr3_extended	last	17.3333	0.0325972
IV	309419	309433	309421	+	YDL082W	utr3_extended	first	186.333	0.0418554
IV	309492	309518	309507	+	YDL082W	utr3_extended	middle	1402.83	0.315114
IV	309518	309547	309529	+	YDL082W	utr3_extended	middle	3049	0.684886
IV	309547	309575	309564	+	YDL082W	utr3_extended	middle	125.667	0.0282281
IV	309831	309848	309842	+	YDL082W	utr3_extended	last	16	0.00359402
IV	323009	323039	323035	+	YDL075W	utr3_extended	first	2954.33	0.215948
IV	323039	323072	323054	+	YDL075W	utr3_extended	middle	10726.4	0.784052
IV	323072	323110	323089	+	YDL075W	utr3_extended	middle	2384.83	0.17432
IV	323110	323144	323130	+	YDL075W	utr3_extended	last	1782.83	0.130317
IV	327533	327549	327537	+	YDL073W	coding_exon	CDS	28.6667	0.0759885
IV	329040	329058	329053	+	YDL073W	coding_exon	CDS	17.6667	0.0468301
IV	329606	329639	329622	+	YDL073W	utr3_extended	first	62	0.164347
IV	329699	329728	329714	+	YDL073W	utr3_extended	last	315.25	0.835653
IV	331171	331193	331187	+	YDL070W	coding_exon	CDS	78.8333	0.050232
IV	331277	331288	331280	+	YDL070W	coding_exon	CDS	17	0.0108323
IV	332044	332064	332059	+	YDL070W	coding_exon	CDS	11.25	0.00716842
IV	332187	332199	332195	+	YDL070W	coding_exon	CDS	20	0.0127439
IV	332199	332224	332210	+	YDL070W	coding_exon	CDS	25.1667	0.016036
IV	332224	332252	332237	+	YDL070W	coding_exon	CDS	20.1667	0.0128501
IV	332252	332277	332266	+	YDL070W	coding_exon	CDS	12.7429	0.00811966
IV	332343	332360	332357	+	YDL070W	coding_exon	CDS	85.8333	0.0546924
IV	332378	332384	332378	+	YDL070W	coding_exon	CDS	13.8333	0.0088145
IV	332569	332589	332581	+	YDL070W	coding_exon	CDS	13.75	0.0087614
IV	332600	332613	332600	+	YDL070W	coding_exon	CDS	13.4667	0.00858087
IV	332613	332633	332625	+	YDL070W	coding_exon	CDS	10.5	0.00669053
IV	332967	332984	332970	+	YDL070W	utr3	first	22.3	0.0142094
IV	333049	333080	333076	+	YDL070W	utr3	middle	87.3833	0.05568
IV	333080	333108	333096	+	YDL070W	utr3	middle	299.633	0.190924
IV	333108	333139	333120	+	YDL070W	utr3_extended	middle	1269.75	0.809076
IV	333139	333175	333157	+	YDL070W	utr3_extended	middle	117.5	0.0748702
IV	333175	333206	333192	+	YDL070W	utr3_extended	last	203.667	0.129775
IV	335045	335069	335058	+	YDL066W	coding_exon	CDS	14.8333	0.0363414
IV	335232	335234	335232	+	YDL066W	coding_exon	CDS	10	0.0244998
IV	336146	336164	336158	+	YDL066W	utr3	first	120	0.293998
IV	336204	336225	336215	+	YDL066W	utr3_extended	middle	51.5	0.126174
IV	336260	336275	336260	+	YDL066W	utr3_extended	middle	30.3333	0.074316
IV	336275	336302	336290	+	YDL066W	utr3_extended	middle	227.167	0.556554
IV	336302	336325	336313	+	YDL066W	utr3_extended	middle	161.333	0.395263
IV	336325	336351	336337	+	YDL066W	utr3_extended	middle	181	0.443446
IV	336435	336446	336445	+	YDL066W	utr3_extended	middle	11	0.0269498
IV	336518	336533	336526	+	YDL066W	utr3_extended	last	156.5	0.383422
IV	338128	338150	338130	+	YDL064W	utr3_extended	first	74.1333	0.134911
IV	338150	338180	338169	+	YDL064W	utr3_extended	middle	329.5	0.599636
IV	338180	338202	338191	+	YDL064W	utr3_extended	middle	133	0.242038
IV	338202	338224	338202	+	YDL064W	utr3_extended	middle	17.5833	0.0319988
IV	338224	338250	338236	+	YDL064W	utr3_extended	middle	220	0.400364
[truncated: 28,932 more rows]
