# Supplementary material for: Delineating yeast cleavage and polyadenylation signals using deep learning
Source: HighWire-hosted journal article supplement (doi:10.1101/gr.278606.123), 2024-06-24
Supplement: Supplemental_Table_S5.xlsx [file Supplemental_Table_S5.xlsx]

## Sheet: Legend
Table S5. The motifs showing significant importance scores from the PolyaStrength model in S. cerevisiae.
This table contains the motif importance quantification learned from the S.cerevisiae-specific PolyaStrength model for 6mers.
Description of the columns:
Motif	The hexamer sequence for the motif of interest.
Family	The assigned motif family based on the sequence composition of the motif.
Score	The per-site importance score for the motif of interest in the denoted region.
95% confidence interval: Lower bound	The lower bound on the 95% confidence interval around the per-site importance score in the denoted region.
95% confidence interval: Upper bound	The upper bound on the 95% confidence interval around the per-site importance score in the denoted region.
Sum importance profile	The position-specific sum importance score for each motif at the indicated position centered around the poly(A) site.

## Sheet: 6mer motif importance
		[-120, -25) region			[-25, -15) region			[-15, -5) region			[-5, 2) region			[2, 15] region			Sum importance profile
Motif	Family	Mean importance score	95% confidence interval: Lower bound	95% confidence interval: Upper bound	Mean importance score	95% confidence interval: Lower bound	95% confidence interval: Upper bound	Mean importance score	95% confidence interval: Lower bound	95% confidence interval: Upper bound	Mean importance score	95% confidence interval: Lower bound	95% confidence interval: Upper bound	Mean importance score	95% confidence interval: Lower bound	95% confidence interval: Upper bound	-250	-249	-248	-247	-246	-245	-244	-243	-242	-241	-240	-239	-238	-237	-236	-235	-234	-233	-232	-231	-230	-229	-228	-227	-226	-225	-224	-223	-222	-221	-220	-219	-218
AAAAAA	A-rich_d0	0.0181731	0.0085519	0.0277942	0.943283	0.876946	1.00962	-0.201374	-0.370908	-0.0318393	-0.719409	-0.880365	-0.558452	-0.0726526	-0.0974217	-0.0478834	0.597081	1.00779	0.353905	0.674942	0.269761	0.676848	0.832567	0.0110453	-0.202002	0.775489	1.13804	1.11163	-0.0594659	0.408723	1.38256	1.1432	1.73074	1.39724	1.59051	1.40907	1.37784	1.10238	0.800743	2.32312	2.67577	1.67508	2.32656	1.35692	2.2461	1.23578	0.623283	1.07541	1.34931
AAAAAG	A-rich_d1	-0.0012144	-0.0195731	0.0171443	0.941652	0.832977	1.05033	-0.138237	-0.266732	-0.00974187	-0.435907	-0.577681	-0.294133	-0.129677	-0.175174	-0.0841809	0.246103	0.202008	0.353765	0.616733	0.243166	-0.001333	0.0570856	-0.012757	0.309781	0.258599	0.130146	0.0353779	0.542327	0.327591	0.40414	1.02734	0.379095	0.407141	0.896694	0.866418	1.04835	0.271786	0.998198	1.06879	0.553999	0.823766	2.0516	1.17759	1.28093	1.23422	0.0150995	0.626524	1.11479
AAAAAU	A-rich_d1	0.045517	0.0278182	0.0632158	0.994407	0.916374	1.07244	0.230244	0.0908137	0.369673	-0.539091	-0.68085	-0.397333	-0.129019	-0.167394	-0.0906442	0.0214486	0.254354	0.110494	0.173729	0.264406	0.334218	0.374585	0.443073	0.0826311	-0.384347	-0.70935	0.128608	-0.122761	0.582355	0.0622655	0.563243	-0.298731	0.20436	0.911345	0.452719	-0.319537	0.65278	0.114036	0.378505	0.979261	0.365402	0.291856	0.218008	0.837993	0.854108	0.345879	-0.679854	0.183849
AAAAGA	A-rich_d1	-0.0214274	-0.0369333	-0.00592153	0.88662	0.778348	0.994893	-0.24414	-0.472908	-0.0153715	-0.499439	-0.614178	-0.3847	-0.0951549	-0.138658	-0.0516518	0.224316	0.317863	0.582021	-0.0485723	0.143878	-0.0798915	-0.0664421	-0.380496	-0.202162	0.0873837	-0.263578	0.396262	0.838754	0.297636	0.643768	0.332978	0.304895	0.574928	1.03209	0.778611	0.334527	0.902795	0.540423	0.999188	0.946087	0.699626	0.675799	1.77808	1.11212	0.874753	1.16886	0.534835	0.914307
AAAAGG	A-rich_d2	-0.0163075	-0.0358088	0.00319381	0.673518	0.497227	0.849809	-0.149634	-0.439575	0.140307	-0.620559	-0.85187	-0.389248	-0.152583	-0.217103	-0.0880638	0.106742	-0.0338998	0.210336	0.20332	0.0980701	-0.205761	-0.142349	0.178964	-0.287357	0.246252	0.170451	0.00760529	-0.13413	0.170702	0.691764	0.400617	0.550343	0.398646	0.684556	1.00919	0.319694	1.10517	0.00130738	0.84232	0.439687	0.635986	0.41479	0.103795	0.788383	1.47907	0.486481	0.291321	0.394709
AAAAUA	A-rich_d1	0.145512	0.123579	0.167446	0.963737	0.881981	1.04549	0.060704	-0.096476	0.217884	-0.737245	-0.901955	-0.572536	-0.157268	-0.199746	-0.114789	-0.428327	0.00704058	0.180256	0.0633664	0.550272	0.127876	-0.128708	0.117483	-0.0780187	0.0428118	0.0962856	-0.622797	-0.128411	-0.553473	0.189792	-0.533888	0.186914	-0.231442	-0.286634	0.286831	0.0553332	-0.737531	0.403299	0.129622	-0.382182	0.403154	0.33051	-0.181287	0.312312	-0.0782027	-0.420779	-0.0196053	-0.325689
AAACAA	A-rich_d1	0.00824614	-0.0159626	0.0324549	0.995423	0.877749	1.1131	0.0930877	-0.0831612	0.269337	-0.748314	-0.981165	-0.515463	-0.158102	-0.228476	-0.0877274	-0.010383	0.170164	0.105884	0.0491198	-0.0479085	0.415981	0.0940944	-0.0559942	-0.0850923	-0.109234	0.321531	0.201269	0.208208	-0.0883366	-0.119068	0.188372	0.771842	0.147495	0.351351	0.191795	0.682899	0.356546	0.727027	0.46949	0.657864	0.199188	0.551583	0.562584	-0.0365983	0.0962076	-0.0850339	0.557636	0.501258
AAAGAA	A-rich_d1	-0.000981885	-0.0168761	0.0149123	0.852504	0.747271	0.957736	-0.344605	-0.756666	0.0674565	-0.724125	-0.920254	-0.527995	-0.157644	-0.206254	-0.109033	0.296326	0.427081	-0.0052065	0.975648	0.17641	0.137735	0.288168	0.4642	-0.203322	-0.247219	0.578094	-0.0299103	0.363998	0.592045	-0.122743	1.37326	0.695735	0.661508	1.42406	1.0006	0.227562	0.216406	1.01372	0.888987	1.2673	0.698408	0.643188	1.00074	2.79244	1.3575	0.688465	0.461922	-0.0463349
AAAGAG	A-rich_d2	-0.00242912	-0.0217717	0.0169134	0.608499	0.408784	0.808215	-0.424994	-0.673434	-0.176555	-0.35193	-0.497649	-0.206212	-0.149202	-0.201973	-0.0964305	0.104494	0.095516	0.132216	0.154639	-0.0308021	0.224493	-0.0629873	0.230322	-0.196537	-0.00690871	0.652855	0.00335278	0.269079	0.206385	-0.0133834	0.237413	0.675721	-0.299017	0.713388	0.331433	0.503714	0.00387596	0.424018	0.231559	0.391564	0.0360963	0.334766	0.427305	0.885176	0.00752148	0.533836	0.0974244	0.445754
AAAGCG	NA	0.00272138	-0.0458053	0.051248	0.664692	0.345556	0.983828	-0.0965629	-0.342025	0.148899	-0.56306	-0.748141	-0.377979	-0.269989	-0.424911	-0.115068	-0.0135995	-0.0561045	0.00366196	-0.0577182	0.182702	-0.0305593	0.106094	0.0769585	-0.034546	0.116507	-0.100155	0.00682674	0.0504147	-0.0186193	0.128115	0.0943954	0.0200583	0.44324	-0.0415107	0.17254	0.0399457	0.127064	0.220655	0.188408	0.834207	0.210102	0.163027	0.205572	-0.0271155	0.0830255	0.0740174	0.583713	0.0933468
AAAGGA	A-rich_d2	-0.00959524	-0.0342413	0.0150508	0.536008	0.406293	0.665724	-0.0358561	-0.640194	0.568482	-0.639232	-1.00708	-0.271381	-0.192446	-0.258118	-0.126774	0.0258412	0.143643	-0.107066	0.0431516	0.127168	-0.255071	-0.244845	0.0973224	0.233008	-0.218531	0.214624	0.0596516	0.367102	-0.112935	0.1698	1.13839	0.278158	0.269411	0.662792	0.157184	0.518707	0.304629	0.849691	0.256341	0.947699	0.426923	0.883607	0.788141	0.493033	0.707606	0.82939	0.134301	0.0797244
AAAUAA	A-rich_d1	0.360153	0.330309	0.389998	0.942034	0.859964	1.0241	-0.39813	-0.627454	-0.168807	-0.768358	-0.911013	-0.625703	-0.214538	-0.265725	-0.163351	-0.0288399	0.0389545	0.0363269	-0.353516	-0.183702	-0.094293	-0.409795	-0.391231	0.061901	-0.669422	-0.290015	-0.60961	-0.913032	-0.840132	-0.809459	0.131608	-0.854516	-1.20784	-0.207117	-0.16526	-0.131042	-0.198691	-0.623414	0.076623	0.309625	-0.362644	0.208509	-0.176782	-0.0636064	-0.549626	-0.047212	-2.27908	-0.383393
AAAUAG	UA-rich_d2	0.403169	0.355917	0.450421	0.487066	0.357447	0.616686	-0.543682	-0.806884	-0.280481	-0.388742	-0.60777	-0.169714	-0.209576	-0.284256	-0.134897	0.0147383	-0.383139	-0.456402	0.0323487	0.0900885	0.00767218	0.00457923	-0.0608426	-0.00948986	-0.0849152	-0.196504	-0.0293353	-0.429015	-0.929993	-0.098208	-0.131008	-0.196453	-0.375928	-0.299743	-0.291807	-0.044345	-0.256928	-0.712609	0.0370292	-0.561451	-0.122155	0.0773273	-0.517636	-0.350387	-1.26173	-0.515596	0.0899061	0.0401184
AACAAA	A-rich_d1	-0.0138777	-0.0385824	0.010827	0.918511	0.793526	1.0435	-0.103326	-0.310431	0.103778	-0.525624	-0.646302	-0.404946	-0.128087	-0.176499	-0.0796757	0.160823	0.0109039	0.244178	0.198694	-0.360525	-0.223833	0.0885691	-0.141462	0.0242146	-0.104398	0.00262729	0.111118	-0.0932419	0.307351	0.193207	-0.246977	0.0958656	0.449823	0.123699	-0.0999201	0.652139	0.725573	-0.0221202	0.281009	0.470175	0.460267	-0.0779738	0.35412	1.26853	0.238589	0.0793813	-0.102874	0.499051
AACGAA	A-rich_d2	-0.0283758	-0.0585104	0.00175887	0.837818	0.64067	1.03497	0.241786	-0.230427	0.713999	-0.588248	-0.799946	-0.376551	-0.25167	-0.334207	-0.169133	0.206394	0.0714528	0.168189	0.192567	0.52758	0.514047	-0.224236	-0.0428506	0.0370615	-0.00335141	-0.0963389	0.138255	-0.406729	0.209305	-0.21788	0.338192	0.139774	0.0701166	0.474429	0.0517668	0.635274	0.224201	0.137105	-0.153088	0.331073	0.91702	0.258021	0.329034	0.328464	0.182036	0.55079	0.359856	0.0269583
AACGCA	NA	0.0122271	-0.0428483	0.0673024	0.872351	0.628116	1.11659	0.130757	-0.119676	0.38119	-0.514759	-0.803064	-0.226454	-0.133565	-0.18644	-0.0806902	0.0103863	-0.0319495	0.0217904	-0.0474453	-0.00199893	-0.156884	0.0740466	-0.039781	-0.0077065	-0.14812	0.0557372	0.048006	0.286698	0.0218168	0.00489105	0.110551	0.054799	0.00501923	0.158423	0.0228616	0.23315	0	0.377418	-0.00484584	0.0556924	0.332843	0.169863	0.278049	0	-0.0168534	0.0117223	0.0159873	0.0106614
AACUAA	A-rich_d2	0.17879	0.125752	0.231828	0.907839	0.760206	1.05547	-0.152721	-0.393155	0.087713	-0.363459	-0.459429	-0.26749	-0.0737647	-0.131403	-0.0161267	0.0960168	0.0256447	-0.00567945	-0.0417358	-0.0298605	-0.0868866	-0.00638416	-0.0836337	-0.647568	-0.163562	-0.0199748	-0.370052	-0.0721125	0.057736	-0.123392	-0.0113078	-0.0775829	-0.0175715	0.182882	0.205398	0.0785076	-0.0865451	0.145764	-0.165588	0.00554749	-0.023312	0.0594311	0.0801361	0.0333929	0.0334861	-0.000104515	-0.216801	0.0584333
AAGAAA	A-rich_d1	-0.005678	-0.0215847	0.0102287	0.779779	0.676332	0.883225	-0.145525	-0.436506	0.145456	-0.579052	-0.698669	-0.459435	-0.173305	-0.218664	-0.127946	0.151588	0.37433	0.063975	0.0595612	0.771885	0.311525	-0.242046	0.186285	0.0557667	-0.359061	0.150732	0.286134	0.297071	0.405599	0.413915	0.896909	2.37389	1.17037	0.883293	1.97854	1.28586	1.23491	0.225246	1.88915	1.24654	1.88369	1.11988	1.35673	1.96944	1.68452	0.511199	0.431879	-0.170647
AAGAAG	A-rich_d2	-0.0100891	-0.0245157	0.00433752	0.521448	0.373339	0.669558	-0.417677	-0.75201	-0.0833446	-0.549998	-0.720131	-0.379865	-0.223096	-0.326697	-0.119494	0.156079	0.150448	0.360565	0.228127	0.372609	0.00473239	0.407323	0.39305	0.561775	0.171864	0.289178	0.146665	0.30579	0.769645	0.756562	0.928229	0.800747	1.28741	1.07701	1.25748	2.24246	1.41908	1.76395	1.24324	1.01774	0.689966	0.664932	0.921761	1.19148	0.826929	0.771982	0.368674	1.16816
AAGAAU	A-rich_d2	0.0223227	-0.00395498	0.0486004	0.77786	0.653016	0.902704	0.0710975	-0.0805279	0.222723	-0.483802	-0.622668	-0.344935	-0.170453	-0.236488	-0.104419	-0.0966992	0.153174	0.0919093	-0.18107	-0.10626	0.132279	-0.0485571	0.262849	0.0814785	0.00299175	-0.132602	0.330725	0.346321	0.046712	0.109488	0.283343	-0.463986	0.344998	0.427364	0.0659001	0.203934	0.329266	0.223595	0.208797	0.406757	0.77439	0.377568	0.555936	0.637487	0.745122	0.768636	0.169881	-0.203406
AAGGAA	A-rich_d2	-0.00221527	-0.0235047	0.0190741	0.527851	0.39102	0.664682	-0.0879284	-0.447485	0.271629	-0.722452	-0.972998	-0.471907	-0.146728	-0.203393	-0.0900626	0.129922	0.532911	0.233332	-0.216142	-0.103476	0.015788	0.0117877	0.151586	0.471043	0.436066	-0.0277096	0.221132	0.108291	0.268145	0.567921	0.0928573	0.52005	0.541388	0.391432	0.750644	0.596003	0.620358	0.85018	0.989809	0.6626	0.717664	0.691695	0.986699	1.46179	0.819052	0.689236	-0.0221895	0.283185
AAGGAG	NA	-0.00664515	-0.0366217	0.0233314	0.321587	0.145227	0.497947	-0.131873	-0.349977	0.0862306	-0.45931	-0.666787	-0.251833	-0.165144	-0.249436	-0.0808519	0.0364278	-0.0234742	0.224124	0.0300849	0.18925	0.0140554	0.0368055	-0.150413	4.74692e-05	-0.00851098	0.0486121	0.0312886	-0.0534966	0.0432814	0.0864965	0.342233	0.249687	0.291978	0.298057	0.367154	0.385136	0.287337	0.243511	0.593938	0.126425	0.253843	0.509598	0.429245	0.191608	0.37867	0.81091	0.633692	0.509291
AAGGGG	NA	0.0232536	-0.0198467	0.066354	0.204571	-0.0209074	0.43005	-0.0335981	-0.46279	0.395593	-0.230107	-0.730878	0.270663	-0.204787	-0.340848	-0.0687256	0	0	0.0574798	0.00486644	-0.0320964	0	-0.0503653	0	0.422254	0.06178	0.0138422	0.0350559	-0.0465387	0	0.202546	0.0948229	0	0.45447	0.0822034	0.0510124	0.370119	0.175955	0.031937	0.00897551	0.18979	0	0.0581759	0.148685	0.0209173	0.182816	0	0.0732014	0.0549533
AAGUAG	NA	0.406094	0.327277	0.484911	0.321607	0.0699169	0.573298	-0.153433	-0.517936	0.21107	-0.366317	-0.554105	-0.178528	-0.300723	-0.402462	-0.198984	0.000593166	0.00627415	-0.169353	0.0800944	-0.268995	-0.108263	-0.160225	0.0286618	-0.0192636	-0.0496696	-0.285656	-0.0193018	0.0288268	0.0443928	0.0924262	0.100894	0.0357708	-0.118349	-0.0325172	0.144973	0.11304	0.0697692	-0.34868	-0.0480488	-0.183101	-0.00121643	-0.115198	0.116956	0.00304407	0.0224349	0	0.00119467	0.058176
AAUAAA	A-rich_d1	0.226072	0.198659	0.253485	1.0821	1.00704	1.15716	-0.378666	-0.603465	-0.153867	-0.716751	-0.87124	-0.562261	-0.206202	-0.264838	-0.147566	-0.0217832	0.089853	0.128284	0.443506	0.465627	-0.186403	-0.193828	-0.0474336	-0.30588	-0.18896	-0.500747	-0.431502	0.285898	-0.230874	-0.791142	-0.993582	-0.140394	-0.26296	-0.0648337	-0.0746997	-0.180635	-1.41566	0.1526	0.042536	0.207694	-0.118681	-0.0505554	-0.360231	0.0680525	-0.257328	0.267361	-0.141041	-0.273557
AAUAAC	A-rich_d2	0.163978	0.120712	0.207243	1.04477	0.934232	1.15531	-0.249459	-0.498007	-0.000910113	-0.600631	-0.755357	-0.445905	-0.182119	-0.254577	-0.109662	0.263033	-0.0143258	0.0162379	-0.0156099	-0.792531	0.0497371	-0.299048	0.120474	-0.116455	0.0256792	-0.138309	-0.0687632	0.0278153	0.0188989	-0.047068	0.0614305	0.191113	0.231228	-0.00713552	-0.293647	-0.250343	-0.0538244	-0.0885944	-0.304944	0.182357	0.0701639	-0.0905742	0.0267906	-0.151144	0	0.298649	0.00919422	-0.164591
AAUAAU	A-rich_d2	0.233469	0.200427	0.266511	1.23556	1.14603	1.32509	-0.167754	-0.281314	-0.0541939	-0.562501	-0.690049	-0.434952	-0.186968	-0.234531	-0.139406	0.0205453	-0.0133096	-0.112061	0.0197792	0.215826	-0.205372	-0.0910546	-0.438966	-0.178641	0.0251041	0.11916	-0.485248	-0.757965	0.21098	-0.520874	-0.0925443	0.526044	-1.00225	-0.267737	0.306045	-0.0877318	-0.0716566	-0.258089	-0.0628328	-0.411335	-0.532741	-1.16885	-0.0920682	-0.226606	-0.319398	-0.635431	-0.00157539	-1.18686
AAUAGA	UA-rich_d2	0.271615	0.230878	0.312352	0.674612	0.546182	0.803042	-0.147708	-0.401477	0.106062	-0.444498	-0.671215	-0.217782	-0.200433	-0.263824	-0.137043	0.0132976	0.0110353	-0.422965	0.0686265	-0.13656	0.0698383	-0.0492758	-0.0150998	-0.202928	-0.0147485	-0.206531	-0.0112188	-0.0388331	-0.0457374	-0.62573	-0.0724622	-0.101034	-0.795656	-0.00579339	0.0721211	-0.461746	0.126979	-0.35445	-0.61176	0.0410815	-0.418117	-0.237828	-0.546507	-0.657149	-0.391921	-0.025591	-0.716101	-0.0743682
AAUAUA	UA-rich_d1	0.480446	0.446508	0.514383	0.794066	0.706836	0.881296	-0.346142	-0.489358	-0.202926	-0.516354	-0.615563	-0.417146	-0.296979	-0.360728	-0.23323	-0.103129	-0.040611	-1.06275	-0.0604991	-0.0655173	-0.258667	-0.114043	-0.148441	-0.0589718	-0.000665917	-0.776171	-0.226271	0.184841	-0.231375	-0.689884	-0.0910415	-0.311038	0.0215152	-0.924323	-0.948172	-0.294626	-1.23019	-0.831251	-0.6078	-1.03916	-0.773678	-1.14467	0.0269932	-0.0320187	-0.592603	-0.454555	-0.553072	-0.343456
AAUGUA	UA-rich_d2	0.380417	0.329642	0.431193	0.705862	0.564182	0.847542	-0.0732279	-0.241919	0.095463	-0.421281	-0.610539	-0.232023	-0.17804	-0.281648	-0.0744307	-0.0258323	-0.0942562	-0.086106	0.00847937	-0.0419786	0.0229008	0.128779	0	-0.260829	-0.0563799	-0.00561289	-0.0136928	-0.0880782	-0.000991161	0	-0.150203	-1.08861	0.00823353	0.114187	-0.0264733	-0.000460595	0	-0.142674	-0.194625	-0.633493	-0.156651	-0.0443226	0.035947	-0.279063	-0.0227383	0.000291557	-0.378556	-0.0271369
AAUUAC	NA	0.184326	0.119706	0.248947	0.658162	0.517231	0.799094	0.210693	0.0785128	0.342874	-0.138823	-0.252319	-0.0253263	-0.0411882	-0.108975	0.0265983	0.0357405	-0.0021298	0.0422372	0.00976572	0.0547579	-0.0198385	-0.0106677	-0.105808	0.0343415	-0.16049	-0.0432847	0.192519	0.108843	-0.184026	0.0034328	0.111301	-0.0281698	-0.382182	-0.087403	-0.787064	-0.183134	-0.169329	0.0188107	-0.000924255	0.10164	-0.113649	-1.09306	-0.17561	-0.0015583	-0.103612	-0.0836504	0.0176945	-0.162741
ACAAAA	A-rich_d1	-0.00116643	-0.0249076	0.0225747	0.866522	0.7511	0.981944	-0.223732	-0.48967	0.0422073	-0.492992	-0.622857	-0.363128	-0.109001	-0.148047	-0.0699547	0.0784601	-0.128807	0.0360003	0.0133178	0.0795662	-0.113477	0.00968347	0.248374	0.448013	-9.51069e-05	-0.0412057	-0.0734248	0.134651	0.459624	0.13061	0.246652	0.803538	0.499469	0.297764	0.256484	-0.0903295	0.21434	0.43475	-0.0823275	0.57306	0.234368	0.541964	0.146082	-0.0386799	0.664404	0.263507	-0.0291122	0.225847
ACAAAG	A-rich_d2	-0.0119096	-0.0411213	0.0173021	0.715727	0.526841	0.904613	-0.393044	-0.744585	-0.0415037	-0.246578	-0.335652	-0.157505	-0.132743	-0.19641	-0.0690766	0.031097	0.0587121	0.0683307	0.25691	0.0516309	-0.00634543	-0.0388117	0.0884145	-0.114659	0.0639949	-0.0324803	0.198737	0.191211	0.12384	0.415556	0.20058	0.140441	0.178058	0.505954	0.206504	0.0661453	0.325236	0.463749	0.239417	0.136003	0.0216942	0.773358	0.289095	0.505506	0.00740724	-0.437633	0	0.211319
ACAAAU	A-rich_d2	0.10787	0.0741446	0.141595	0.851318	0.718809	0.983826	-0.07525	-0.231716	0.0812163	-0.317	-0.452427	-0.181574	-0.144109	-0.215745	-0.0724726	-0.0380066	-0.0191237	-0.101014	0.183413	-0.119369	-0.214754	-0.0322462	-0.206508	0.100641	-0.0258921	-0.0648375	0.117117	-0.136568	-0.252952	0.0572244	0.0266292	0.121615	0.0476806	0.0224474	-0.197176	-0.0129278	-0.0659966	0.183977	-0.00465919	0.227978	0.116241	0.126638	-0.318143	0.0209574	0.0924382	0.0326261	-0.141687	-0.163834
ACAUAA	UA-rich_d2	0.569102	0.514635	0.623569	0.807338	0.661577	0.953098	-0.65553	-0.925529	-0.385531	-0.640658	-0.78674	-0.494577	-0.267636	-0.368748	-0.166524	0.0376716	0.0250849	-0.0863422	-0.365112	-0.155881	0.191645	-0.187972	0	-0.0213933	-0.26181	-0.0550865	-0.106186	-0.242352	-0.141581	-0.0787564	-0.147376	-0.687497	-0.364084	-0.661448	-0.603935	-0.5558	-0.525868	-0.693035	0	-0.385978	0.0482883	-0.176282	-0.502035	0.0567338	0	0.01005	-0.277954	-0.284477
ACAUAG	UA-rich_d2	0.563623	0.49079	0.636455	0.2413	-0.0734969	0.556098	-0.556481	-0.844089	-0.268873	-0.273971	-0.460521	-0.087421	-0.186027	-0.284267	-0.0877865	-0.00760013	-0.0232625	0.0168753	0.0684081	0	-0.00902261	0.0341547	-0.0258912	-0.2365	0.15586	-0.240203	-0.161958	-0.0778328	-0.0536663	-2.38025	0.00109979	-0.311004	-0.0322987	-0.0204939	-0.0302804	-0.0433539	0	-0.522827	-0.150943	-0.353724	-1.04874	-0.779726	-0.514796	-1.20357	-0.0574553	0.138633	0	-0.0489852
ACAUAU	UA-rich_d1	0.485566	0.446976	0.524157	0.27258	0.0866884	0.458471	-0.425617	-0.597545	-0.25369	-0.28265	-0.417531	-0.147769	-0.122747	-0.185131	-0.0603631	0.0350145	-0.0210248	0.00524362	-0.0317908	0	-0.0435675	-0.951239	-0.128553	-0.636435	0.052937	-0.0675976	0.111287	-0.195051	0.0410283	-0.0394141	-0.258483	-0.37937	-0.0732096	-0.0133916	-1.5983	-0.627533	-0.0104611	-0.0916156	-0.515919	-1.27473	-1.3731	-0.431896	0.00440523	-0.0472623	-0.358472	-0.576853	0	-0.312262
ACGAGC	NA	-0.00531001	-0.0359621	0.0253421	0.125899	-0.0931151	0.344912	-0.149237	-0.285575	-0.0128985	-0.237783	-0.497635	0.0220678	-0.0916921	-0.122541	-0.0608436	-0.00281616	-0.0118328	-0.0113131	0.000165974	-0.0299066	0	0	-0.0543947	0.0216841	0.0461668	0.00896135	0	0	0	0.104489	0.0217933	0.0439893	0.147289	0.138364	-0.0303805	0.0880316	0.126259	-0.019843	0.0397341	0	-0.011945	-0.00757932	0.136751	0.109782	0.0658229	-0.0218453	0.116066	-0.0355051
ACGGGG	NA	0.0432522	-0.00655641	0.0930608	0.243901	-0.486428	0.97423	-0.20151	-0.424242	0.0212218	-0.224645	-0.993788	0.544498	-0.234921	-0.391779	-0.0780627	0	0.0213467	-0.112658	-0.023254	0	0	-5.87619e-05	0	0	0	0	0	0	0	0	0	0	0	0.0186624	0.116454	0	0	0	0	0.0427371	0	0	0.171355	0.0698272	0	0	0.0685472	0
ACGUAA	NA	0.472127	0.384382	0.559872	0.772096	0.526353	1.01784	-0.796161	-1.50525	-0.0870713	-0.512043	-0.754439	-0.269647	-0.204639	-0.340137	-0.0691403	-0.013505	0.00927703	0	0	-0.00973404	-0.0842148	-0.0774371	-0.153991	0	-0.31508	0	0	0.00170034	0.0942862	-0.0409046	-0.0995483	0	-0.939847	0	-0.201268	0	-0.0149943	-0.687093	0.021391	0	-0.0777336	0	0	-0.0224245	-0.858935	-0.0315618	0.0848734	0.00779243
ACGUAC	NA	0.550543	0.453319	0.647768	-0.300382	-0.64149	0.0407255	-0.561594	-1.11664	-0.00654404	-0.536809	-0.889948	-0.18367	-0.117672	-0.218639	-0.0167056	0.00795092	0	-0.0223341	0	0	0	0	-0.00444439	0	-0.00868677	0	0	-0.175114	-0.0563492	-0.0492847	0	0.00374287	0	-0.279874	-0.21643	0.0157152	-0.02442	-0.336651	-0.013828	-0.0191451	-0.135184	0.000338199	0	0	-0.308265	-0.0221699	0	0
ACGUAG	NA	0.532546	0.417797	0.647296	-0.123801	-0.71963	0.472028	-0.65387	-1.09377	-0.213968	-0.117614	-0.267453	0.0322255	-0.274252	-0.434271	-0.114232	-0.0670958	-0.0208936	-0.0514442	0.0954261	-0.00238615	0	-0.0896617	0	0.0143836	-0.0484674	0	0	0	-0.000610266	0.0126115	0	-0.00350843	-0.244864	-0.0123937	0.0156838	-0.00474625	0	-0.41854	0.0226783	-0.247513	-0.0470632	-0.0480366	0.0127342	-0.0263528	-0.000694111	0	0	0.00225364
ACGUAU	UA-rich_d2	0.501641	0.434625	0.568657	0.0510388	-0.192902	0.29498	-0.258848	-0.468432	-0.0492641	-0.526777	-0.766093	-0.287461	-0.111408	-0.199375	-0.0234407	0	-0.0411264	-0.0615276	-0.253076	-0.107427	0.0373238	0	-0.114708	-0.109516	-0.00187866	0	0	0.373886	-0.0954428	0	-0.034619	0.017503	-0.0752396	0.0189613	0.071885	-0.0273394	-0.102402	0.00669741	0.0483149	0	-0.0269028	-0.124121	-0.0355362	0.0226883	0.015518	0.0137816	0.0240803	-0.168496
AGAAAA	A-rich_d1	0.00410182	-0.0166978	0.0249015	0.748931	0.641008	0.856855	-0.470467	-0.932646	-0.00828857	-0.487373	-0.580891	-0.393855	-0.0740872	-0.114796	-0.0333786	0.072673	0.33736	0.560697	0.197266	-0.105085	0.0283114	-0.0259816	-0.220517	-0.0033082	0.470065	0.0868997	-0.259368	1.1532	0.301152	0.600831	0.358094	0.606267	1.21897	0.41716	0.708915	1.1144	1.22078	0.375924	0.543309	2.65247	1.2265	1.52402	0.42686	0.569391	1.05286	1.49955	0.380705	0.61322
AGAUAA	UA-rich_d2	0.271315	0.224388	0.318243	0.538224	0.409527	0.66692	-0.320562	-0.614749	-0.026375	-0.483729	-0.668052	-0.299406	-0.153761	-0.224573	-0.0829492	-0.0703135	-0.0523195	0.0262336	0.0566794	0.0548517	0.0552555	0.0363337	-0.0268717	0.000373134	0.0397623	-0.351703	-0.253349	-0.105255	0.161464	-0.0341601	0.143848	0.0988769	-0.721144	-0.201475	-0.0932344	-0.364074	0.230955	0.118344	-0.458876	0.0746226	-0.157744	-0.339351	0.0356397	-0.228301	-0.0115199	-0.200146	-0.17636	-0.590864
AGAUAG	UA-rich_d2	0.370305	0.30524	0.435371	0.223798	0.0481198	0.399475	-0.754049	-1.20412	-0.303975	-0.275561	-0.474611	-0.0765113	-0.187108	-0.30228	-0.0719364	-0.0642586	0.0126581	-0.0163707	-0.00707417	-0.0233094	0.0423048	0.029702	-0.0352622	0.0932143	-0.040726	-0.0557457	-0.0565067	0.102326	-0.00724565	-0.107611	-0.0666183	-0.0124762	-0.123667	-0.554772	-0.368965	0.0536885	0.0346864	0.0644098	-0.0922649	0.122689	-0.126647	0	0.00489377	0.00114527	-0.0750316	-0.0709767	-0.0294941	0.0461248
AGAUAU	UA-rich_d1	0.412291	0.362821	0.46176	0.220025	0.0677992	0.37225	-0.286063	-0.459064	-0.113062	-0.390982	-0.59993	-0.182034	-0.164258	-0.238652	-0.089863	-0.25021	-0.142921	-0.254372	-0.0170457	-0.122392	0.238599	-0.0692854	0.134913	0.146536	0.00783889	-0.0996863	-0.243181	-0.183343	-0.408381	0.0405897	-0.366769	0.0480375	-1.13993	0.0332561	-0.0937277	-0.237563	-1.35963	0.00259548	-0.0126019	-0.266708	-0.326941	-1.72725	-0.179932	0.045939	-0.058687	-0.175316	-0.0565376	-0.249016
AGAUGU	UA-rich_d2	0.214645	0.157468	0.271823	0.170069	-0.0717379	0.411876	-0.0509914	-0.152643	0.0506598	-0.0653438	-0.145979	0.0152912	-0.0540165	-0.108077	4.38477e-05	-0.00811873	-0.193487	-0.106036	-0.289216	-0.166222	0.0240367	-0.0129876	0.0472518	0.0177713	-0.00841587	-0.0623741	-0.050621	-0.298992	-0.0180143	0.0109923	-0.0598294	-0.0464746	0.0357149	0.0239006	0	0.033061	-0.0736007	-0.382761	-0.914878	-0.0141653	0.0244626	0.125595	0.0968817	0.0615024	0.0237576	0.0679542	-0.313749	0.0245962
AGGACC	NA	-0.00319192	-0.0205436	0.0141597	0.0644782	-0.405214	0.53417	0.0115808	-0.400763	0.423925	-0.20085	-0.350333	-0.0513666	-0.111739	-0.2241	0.000622003	-0.000226406	0.00832933	0	0.00857289	0.00905359	-0.00389707	0.0155148	-0.00295259	-0.00646335	0	0	-0.0644217	0.0170345	0.08223	-0.084385	0.108543	-0.0175063	0.0303966	-0.00319426	0.0543271	0.0261832	-0.0120608	0.0599662	0	0	0.0323255	0	0	0.121831	0	0.0144751	0.0526844	0.0122238
AGGAGA	NA	0.0141305	-0.0112117	0.0394726	0.140885	0.0241963	0.257574	-0.259308	-0.422174	-0.0964415	-0.366029	-0.445454	-0.286604	-0.11609	-0.200525	-0.0316546	0.0822499	0.0384839	0.141028	0.313335	-0.00964179	0.117083	-0.0587499	1.62419e-05	0.0366708	0.0922213	0.0193996	0.0612367	0.0529363	0.00914369	-0.0255995	-0.00317336	0.165353	0.105514	0.0624907	0.195415	0.187568	0.108254	0.200207	0.148736	0.527483	0.121497	0.0633059	0.376603	0.219732	0.140124	0.326826	0.894831	0.0761529
AGGGAC	NA	0.0147514	-0.0555798	0.0850825	0.349434	-3.87431	4.57318	-0.403299	-1.0353	0.228697	-0.235624	-0.412828	-0.0584193	-0.240878	-0.384728	-0.0970282	0	0.0452162	-0.00922784	0	-0.0611165	0.0487176	-0.114426	0.056996	-0.00489156	0.0226092	0	-0.0024445	0	0.170668	-0.0512911	0.00256683	-0.0117773	0.0273222	0.453373	0	0.00887751	0.045267	0	0	0.0429052	0	0.0152955	0.206027	0.112571	0	0	0	0.0579433
AGGGAG	NA	0.0262202	-0.00120544	0.0536459	-0.0602879	-0.276047	0.155471	-0.184135	-0.579868	0.211599	-0.282608	-0.490135	-0.0750803	-0.147335	-0.271156	-0.0235144	0.0579952	0	-0.0345774	-0.0101256	0.112283	0.00509407	0.0345227	0.00205077	0.0184989	-0.0283865	-0.00466111	0.0816806	0.0370712	0.0297852	0.0765589	0.127395	0.148125	-0.00441749	0.145873	0.327064	0.117486	0.282645	0.0324114	0.0923591	0	0.494072	0.110541	0.0273424	0.00726362	-0.0113436	0.0449851	0.0431635	0.214241
AGGGGA	NA	0.0369778	0.00416376	0.0697919	0.24674	-0.185754	0.679233	-0.322591	-0.516324	-0.128859	-0.385051	-0.705888	-0.0642131	-0.221484	-0.338986	-0.103982	0.00698475	0.0133212	0	0.00576685	-0.0532955	-0.0151047	-0.023789	-0.0313839	0	0.150081	0.110811	0	0.0232796	0.0942433	0	0	0.28756	0	0	0.091121	0.0769144	0	0.0509367	0.0676688	0	0.0627151	0.0232554	0.0253414	0.308431	0	0.0249521	0.141211	0
AGGGGC	NA	0.0421157	0.00472361	0.0795077	0.0333995	-1.98135	2.04815	-0.311643	-0.598395	-0.0248909	0	0	0	-0.267744	-0.635999	0.100511	0.0110209	-0.0571779	0.023825	-0.0133299	0	0	0	-0.00445225	0	0.0289755	0	0	0.0393548	0	0	0	0	0.0492746	0.0661882	0	-0.00912875	0.210365	0	0	0.0163091	0	0.135989	0	0.0190015	0	0	0.0339561	-0.00608752
AGGUAA	NA	0.161272	0.102179	0.220366	0.454783	0.17694	0.732626	-0.36049	-0.687445	-0.0335358	-0.469292	-0.621936	-0.316648	-0.138319	-0.224966	-0.0516724	-0.0449159	0.0443003	-0.085103	0.148647	0.0161241	-0.217842	0.0338227	-0.14774	-0.0293139	-0.00974156	-0.03183	-0.0230834	0.0405214	0.0269508	-0.194951	0.0104135	-0.0365495	0.0806218	0.0119769	0.00253504	-0.0575943	-0.0813947	-0.118166	0.455619	-0.155473	0.195154	0.113324	0.108509	0.0633992	0.0273959	-0.284821	0.168494	-0.0354132
AGUAUA	UA-rich_d2	0.525075	0.469924	0.580225	0.472061	0.312221	0.6319	-0.505858	-0.722186	-0.289531	-0.352431	-0.52282	-0.182042	-0.133035	-0.194817	-0.0712522	-0.0111554	0.101339	-1.40521	0.134228	-0.512812	-0.0341168	0.00981059	-0.204632	-0.29821	-0.0447607	-0.21198	0	-0.00245484	-0.0999648	-0.00867268	-0.248633	-1.75282	-0.011266	-0.0484603	-0.426054	-0.248518	-0.0209768	0.0055611	-0.103694	-0.0592466	-0.292501	-0.710073	0.0580561	-0.460858	-0.035319	-2.37364	-0.276599	-0.0837035
AUAAAA	A-rich_d1	0.189026	0.161075	0.216978	1.12048	1.04479	1.19618	-0.239262	-0.456114	-0.0224104	-0.666225	-0.779256	-0.553195	-0.174084	-0.221471	-0.126698	0.198215	0.251331	-0.0724333	-0.0610936	0.379438	0.225893	-0.0430545	-0.0897019	-0.446387	0.0591247	-0.218299	-0.165538	-0.0669567	0.347592	-0.013352	-0.138091	-0.0827278	0.299462	-0.0854584	0.0315537	0.0129452	-0.00541522	-0.231893	-0.168411	-0.180702	-0.361885	-0.169586	0.172748	-0.0991719	-0.307213	-0.420511	-0.684389	-0.349338
AUAAAU	UA-rich_d1	0.51847	0.481518	0.555423	0.76247	0.66945	0.855489	-0.407897	-0.561934	-0.25386	-0.476519	-0.610081	-0.342957	-0.331303	-0.411631	-0.250974	-0.186287	-0.646922	-0.0264639	-0.44276	0.0478243	0.345536	-0.115264	0.0206527	-0.24964	-0.731285	-0.0899293	-1.15401	0.0569305	0.417232	-1.00237	0.0141708	-1.41551	0.0310578	-0.36017	-0.278876	-1.05292	-0.352219	-1.78986	-0.578292	-0.0700263	0.193586	-0.568402	0.0204407	-2.0683	-0.748147	0.122977	0.28644	-0.337485
AUAAGA	A-rich_d2	0.22219	0.172805	0.271574	0.947196	0.810229	1.08416	-0.245094	-0.599066	0.108878	-0.689877	-0.868956	-0.510799	-0.184776	-0.290045	-0.0795078	-0.0111309	0.15247	0.0437351	0.0104914	0.0355574	-0.280901	-0.218418	-0.111004	0.0974597	-0.271034	-0.319726	-0.0471106	0.0299221	0.0573594	-0.498903	0.24925	-0.0303704	-0.0151738	0.0636823	0.0857707	0.0324964	0.0386988	-0.208014	0.0592456	-0.0395185	0.0207408	0.21987	0.0256411	-0.0107257	-0.0533998	-0.200449	0.108932	-0.106104
AUAAGU	UA-rich_d2	0.540159	0.473566	0.606752	0.599281	0.400692	0.797869	-0.286819	-0.523277	-0.0503606	-0.59214	-0.945445	-0.238836	-0.284261	-0.371024	-0.197499	-0.0709789	0.0242109	0.018347	-0.324446	0.037081	0.0232999	-0.192177	-0.634651	-0.46304	-0.021618	0.0402577	-0.15979	-0.00707288	0	-0.00383419	0.00594269	-0.0202619	0.0294115	-0.739364	-1.07094	0.173948	-0.784913	-0.0387136	-0.19937	0.0296451	0.0252128	0.0382205	-0.0152886	0.0379115	-1.22362	-0.0569112	-0.811152	-2.77657
AUAAUA	A-rich_d2	0.38738	0.350307	0.424454	1.13832	1.05973	1.21692	-0.203314	-0.320967	-0.0856608	-0.644621	-0.781122	-0.50812	-0.208931	-0.257725	-0.160138	-0.563583	0.106725	-0.201322	0	-0.0407469	0.329037	-0.0893911	-0.00520277	-0.869059	-0.0118734	0.0376965	-0.772367	-0.233349	-1.29314	0.367165	-1.44417	0.14378	0.569282	-0.896175	-0.279904	0.255934	-1.53898	-0.760595	-0.39672	-0.268567	-0.618165	-0.680907	-0.820433	0.243488	0.00756535	-0.090264	-0.345487	-0.214912
AUAAUU	UA-rich_d2	0.42004	0.375283	0.464796	0.946665	0.851768	1.04156	-0.108563	-0.225839	0.00871198	-0.372746	-0.499622	-0.245869	-0.194598	-0.264886	-0.124311	0.0137079	0.0162956	-0.0681997	0.055731	-0.0405109	-0.779697	-0.137978	-0.280359	-0.867755	0.105626	-0.0411822	-0.0676063	-0.292869	-0.18923	0	0	-0.230907	-1.42417	-0.0394411	-0.752938	-0.271711	-0.116624	-0.458296	0.34844	-0.581044	-0.425998	-0.250612	-1.11776	-0.60021	-0.227295	-0.146046	-1.37878	-1.09174
AUACAA	UA-rich_d2	0.253509	0.21075	0.296267	0.88137	0.738878	1.02386	-0.151936	-0.417283	0.113411	-0.515151	-0.636071	-0.394232	-0.174795	-0.267552	-0.0820377	0.0692262	0.0528056	0.0156001	-0.0087759	-0.0719341	0.134415	0.0210754	0.10773	-0.0333386	0	-0.132165	-0.165369	0.109548	-0.211706	-0.278937	0.0992674	-0.0447416	0.0261595	0.109864	-0.0384031	-0.169742	0.0186562	0.0381264	0.0560786	0.0143736	0.00595835	-1.03086	0.160628	-1.39156	0.0113527	-0.113005	-0.0670062	0.114525
AUACAU	UA-rich_d1	0.554687	0.514234	0.595139	0.0426717	-0.113359	0.198703	-0.350816	-0.511792	-0.189839	-0.381258	-0.496312	-0.266204	-0.236237	-0.307002	-0.165473	-0.0244685	0.0165025	-0.0399414	-0.0218004	0.00117579	-0.0398421	-0.00065228	0.277114	-0.330092	-0.0100494	-0.169909	0	-0.774474	-0.462612	-0.360763	-0.300285	-0.0429903	-0.0394663	-0.090222	-0.0268883	-0.314995	-0.121335	-0.0496144	-1.17976	0.0101614	-1.06797	-1.20735	0.093772	-0.559565	-0.065261	-0.19427	0	-0.719102
AUAGAU	UA-rich_d1	0.549602	0.498075	0.601129	0.292995	0.125533	0.460458	-0.465967	-0.657158	-0.274777	-0.523366	-0.854368	-0.192365	-0.203185	-0.282182	-0.124189	-0.0452336	0.133429	0.017389	-0.548494	-0.00393869	0.0121669	-0.0218971	-0.0644796	-0.171718	-0.114509	-0.0948729	-0.0159384	-0.255532	0	-0.14676	-0.0157704	-0.865481	-0.0533874	-0.0613505	-0.261098	-0.458463	-1.26255	-0.210366	-0.273444	-1.01676	-0.560461	-0.0803272	-0.142286	-0.222115	-0.930447	-0.306392	-0.0441579	0.0151668
AUAGGC	NA	0.259288	0.173665	0.344911	-0.1139	-0.378412	0.150611	-0.453652	-0.857575	-0.0497282	-1.10738	-8.95727	6.74252	-0.163125	-0.304878	-0.0213718	0	-0.00197806	0	-0.0080979	-0.0232541	0	-0.0223579	0	0.033089	0	0.0717644	0.0332514	-0.187235	-0.003907	0	0	0.00538262	-0.451582	0	-1.41846	-0.323698	0.00642302	-0.0147582	0.0954717	-0.0503045	-0.398631	0.0239724	0	0	-0.191548	0	-1.11873	0
AUAGGG	NA	0.236997	0.147913	0.326081	0.232044	-0.0861253	0.550213	-0.0889719	-0.307146	0.129202	-0.295117	-0.469278	-0.120955	-0.159975	-0.251749	-0.0682011	0.000616824	-0.0327435	0	0	-0.132484	-0.00950438	-0.0408772	-0.0063442	0	-0.0286214	-0.0406311	0	0	-0.0111787	0	0.0430292	0.0454319	0	0.0173794	0	0	0.0749237	0.0570416	0.0136062	0.00905182	-0.00620605	0.0594691	0	-0.000861617	0	0.00909144	-0.0179339	0
AUAGGU	UA-rich_d2	0.469238	0.372857	0.565619	-0.225818	-0.617616	0.16598	-0.266373	-0.457037	-0.0757093	-0.277976	-0.551936	-0.00401648	-0.259201	-0.457484	-0.0609176	-0.00188075	-0.0638765	0.025403	0.0227199	0	0.0209611	-0.0183831	0.0737	-0.0235976	-0.233951	0.00901308	-0.1121	-0.132709	-0.115785	-0.166636	0.00796459	-0.0304024	-0.0684984	-0.207021	0	-0.136646	-0.4836	0.0373071	0	-0.00535351	0.148773	-0.219826	-0.539619	0.0941443	-0.0646034	-0.087504	-0.621993	-0.771715
AUAGUG	NA	0.412791	0.326202	0.49938	0.355628	-0.0131712	0.724427	-0.24181	-0.45475	-0.0288696	-0.581412	-0.969398	-0.193426	-0.119719	-0.188532	-0.0509056	-0.000537514	0.0249151	-0.0136776	0.0275416	0	0.156453	-0.00133876	-0.0156108	0.0506091	-0.00791507	0.207008	-0.0517255	0.0173765	0	0.04205	-0.0131692	0	0	0.0411627	0.036576	0.0186458	0.15191	-0.0718458	0.0763303	-0.326453	0.054657	0	-0.0192023	-0.68498	0.00804727	0	-0.374098	-0.0136902
AUAUAA	UA-rich_d1	0.645096	0.60694	0.683252	0.800422	0.711625	0.88922	-0.533158	-0.711972	-0.354344	-0.8386	-1.04206	-0.635139	-0.292836	-0.362235	-0.223438	-0.0548926	-0.13021	-0.295516	-0.176473	-0.494091	-0.518529	-0.475258	0.258384	-0.703373	-0.399795	0	-0.266223	-0.236923	-0.409346	-1.33399	-0.0769937	-0.0565636	-0.479956	-0.369456	-2.51199	-0.0356503	-1.36056	-0.364383	-0.207507	-0.47407	-0.874565	-1.90807	-1.13747	-0.384505	-1.65438	-0.339105	-2.3483	-0.355581
AUAUAC	UA-rich_d1	0.596712	0.558358	0.635065	0.232876	0.0669301	0.398822	-0.538104	-0.694481	-0.381726	-0.545373	-0.701129	-0.389616	-0.290332	-0.374543	-0.206121	-0.018686	-0.0238278	-0.168223	-0.706505	0.0554406	-0.0739123	-0.217249	-1.27409	-0.679495	-0.165133	-1.02577	0.124146	-0.190762	-0.141283	0.0402591	-0.890387	-0.591741	0	-0.442702	-0.729208	-0.0116603	-1.13627	-1.58417	-1.73044	-1.101	-0.0342685	-2.33302	-0.468327	0.0353462	0.000830818	-0.188035	-0.523136	-1.84669
AUAUAG	UA-rich_d1	0.77087	0.714213	0.827528	0.390495	0.231766	0.549225	-0.486072	-0.714333	-0.257811	-0.706892	-0.965614	-0.448169	-0.325343	-0.418133	-0.232554	-0.0401775	0.00641456	-0.220139	-0.0350855	-0.158775	0.0666488	-1.5369	0.0665158	-0.321071	0.0449031	0	-0.126801	-0.0364299	-0.563942	-0.054038	-0.513946	-0.308062	-2.39546	-0.678683	-0.0555366	-0.404648	0	-0.544545	-0.905749	-0.359071	-0.596477	0.134033	-0.430766	-0.633636	-1.31119	0.112578	-0.0509674	-0.714326
AUAUAU	UA-rich_d0	0.527493	0.506524	0.548461	0.0316513	-0.0720164	0.135319	-0.55041	-0.651131	-0.449689	-0.510984	-0.629087	-0.392881	-0.250658	-0.296029	-0.205287	-0.612126	-0.0580211	-0.683923	-0.395242	-0.665795	-1.44933	-0.368587	-0.689484	-0.813541	-0.0674386	-3.98843	-0.886617	-3.27255	-0.138019	-0.195863	-0.606514	-0.255858	-0.118384	-0.817125	0	-1.27713	-0.743735	-3.75767	-1.12897	-1.60559	-0.74097	-2.58357	-1.29835	-1.23673	-1.49187	-0.509185	-0.623753	-0.208523
AUAUGU	UA-rich_d1	0.517659	0.475795	0.559524	0.0776632	-0.0636565	0.218983	-0.271235	-0.43036	-0.112111	-0.272485	-0.458303	-0.0866668	-0.13421	-0.195362	-0.0730586	0.0234306	-0.156902	-0.48684	-0.718121	0.020053	-0.0819117	-0.319841	-0.108476	-0.00365173	-0.145898	-0.0760553	-0.0136236	-0.0834694	0	-0.086599	-0.0798158	-0.119683	0.00576207	-0.0202297	-1.65597	-0.0843217	-0.238533	-0.0339019	0	-0.748027	-2.58521	-1.16021	-0.0774677	-1.46129	-0.577778	-0.695439	-0.35513	-0.914977
AUGUAA	UA-rich_d2	0.572699	0.517029	0.628368	0.760286	0.617044	0.903528	-0.888603	-1.24799	-0.52922	-0.458427	-0.628194	-0.28866	-0.314034	-0.431967	-0.196102	-0.0496313	-0.145768	0.0381166	-0.223269	-0.480265	-0.537473	-0.0963787	-0.111311	-0.216323	-0.0539788	-0.0319195	-0.020038	-0.3027	0	0.0190481	-0.154464	-0.210824	0.0473939	-0.239061	0.0771498	-0.0393575	6.52127e-05	-0.0257934	-0.0159012	-0.116264	-1.39953	-0.627793	-0.632048	-0.110401	-0.604957	-0.0392388	-0.192475	-0.572104
AUGUAC	UA-rich_d2	0.571722	0.502225	0.64122	0.278351	-0.101095	0.657796	-0.631982	-0.990333	-0.273631	-0.30714	-0.493006	-0.121274	-0.185617	-0.273299	-0.0979355	-0.0334788	-0.00510473	0	0.000758634	-0.055006	-0.382231	-0.291656	-0.161378	0	0.0444327	-0.042397	-0.0119042	-0.362087	-0.237302	0.128232	0	-0.254737	0	-0.175458	-0.155822	0.0160407	0.0545604	0.00114355	-0.107729	-0.177678	0	-0.101216	-2.77198	-1.1202	-0.274038	-0.593047	-0.0371864	-0.173875
AUGUAG	UA-rich_d2	0.603579	0.5153	0.691857	-0.0648013	-0.361703	0.232101	-0.437779	-0.628944	-0.246615	-0.530404	-0.975634	-0.0851742	-0.252393	-0.403599	-0.101187	-0.0380009	0.0247164	0	-0.00149119	-0.113387	-0.0341026	-0.058078	-0.0398228	-0.274494	-0.058378	-0.0098519	0.0204118	-0.039102	-0.0931861	-0.323115	0	0.0269977	-1.02271	0.0397861	-0.0813863	-0.15665	-0.00472122	-0.260857	0.019865	-0.134292	0	0	0.0415168	-0.0457966	0	0	0	0
AUGUAU	UA-rich_d1	0.550019	0.511463	0.588575	0.107564	-0.0309929	0.246121	-0.386156	-0.540426	-0.231886	-0.415114	-0.629249	-0.20098	-0.165021	-0.233233	-0.0968089	-0.561768	0.00893969	0.00554553	-0.677859	-0.647453	-0.440139	-0.00277989	0.0881373	-0.0748549	-0.223837	-0.0493187	-0.387096	0	-0.465407	-0.124613	-0.493203	0.0863808	0	-0.696202	-1.13991	0	-2.75985	-0.0922545	-0.53478	0	-0.583247	-0.191117	-0.173267	-0.368205	-0.0617817	-0.894847	-0.868601	-0.595046
CAAGGG	NA	-0.000986832	-0.025713	0.0237393	0.197107	-0.0607238	0.454938	-0.318157	-0.53574	-0.100575	-0.325838	-0.504813	-0.146863	-0.0919757	-0.228037	0.0440857	-0.00769786	0.0304004	0.0203955	-0.0696422	0.0300248	0.0478639	-0.0295226	0.449763	-0.0137159	-0.0842533	0.0777891	-0.0128874	0.0330933	0.101396	0.124175	0.164276	0.102932	0.239104	0.00252932	0.00730879	0.157008	0.0820323	0.0649166	0.578574	0.262004	0.0786608	0.177442	0.0969279	0.201271	-0.0386657	0.112431	0.0495217	-0.0153075
CAAUGC	NA	-0.0420175	-0.0778105	-0.00622442	0.416611	0.252961	0.580261	0.0414204	-0.119941	0.202781	-0.226328	-0.388483	-0.064173	-0.0118851	-0.0612776	0.0375075	0.0385895	-0.0168331	0	-0.0353538	0.0253503	0.0438215	0.0456071	0.189787	0	-0.0227014	0.0711875	0.0119928	-0.0248117	0.171525	0	0.0423476	0.0239563	0.116388	0.0272372	0	0.0243843	0	0.00328564	0.0161335	0.0162012	0.153054	0.0140988	0.0312497	0.0456438	0.0815077	0.0334523	0.0834116	9.58578e-05
CAGGGA	NA	0.0210612	-0.012921	0.0550434	0.0913028	-0.283308	0.465914	-0.129835	-0.186372	-0.0732985	-0.359759	-4.17595	3.45643	-0.0902678	-0.138871	-0.0416642	-0.00757718	0.00040856	0.0547849	-0.0499937	0.0458286	0.00475955	0.0243899	0	-0.0305682	0.0241052	0.0105496	0.0383183	0.0556953	-0.0178455	0.0382219	0.0217617	0	0.0653326	0.252016	0.000945216	0.15442	0	0.0564513	0.0436095	0.0443932	0.100004	0.233104	0	0.065018	0.0363673	-0.0266949	0.31768	0
CAUGUA	UA-rich_d2	0.383312	0.328391	0.438234	0.0989049	-0.146374	0.344184	-0.374227	-0.533891	-0.214562	-0.11482	-0.223577	-0.0060629	-0.0231887	-0.0663191	0.0199418	-0.00344489	0.00528333	-0.0451738	-0.605217	0.0295453	-0.244176	-0.0706328	-0.0196603	-0.15162	-0.0532649	-0.035184	-0.125033	-0.0898095	-0.103716	-0.618375	-0.286145	-0.150899	-0.472765	-0.103703	-0.138977	-0.298361	-0.297931	-0.100514	0	-0.315844	-0.208879	-1.2881	-0.246393	-0.0327315	-0.0664677	-0.479712	-0.114682	-0.717713
CCGGGG	NA	0.00687652	-0.158138	0.171891	0.182523	-0.31633	0.681375	-0.162613	-0.403455	0.0782284	0.214757	-2.60544	3.03495	-0.124282	-0.26902	0.0204556	-0.046954	0	0	0	0	0	0	0.034449	0	0	0	0	-0.0512649	0	0.0874455	0	0	0.0494453	0	0	0	0.00604259	0.0103365	0.0265747	0	0.0455001	0	0	0	0	0	0	0
CCUUUU	U-rich_d2	-0.0120915	-0.0346856	0.0105026	-0.256551	-0.387753	-0.125349	0.398693	0.347079	0.450307	0.543936	0.472173	0.615698	0.307725	0.273615	0.341835	-0.0570879	-0.0166212	-0.12424	-0.0887802	0.109482	0.239651	-0.283231	-0.0592234	-0.143124	-0.0675352	-0.129642	-0.036183	-0.0731552	-0.0416661	-0.523631	-0.198605	-0.473664	-0.616802	-0.121735	0	-0.56633	-0.524039	-0.687918	-0.803132	-0.489372	-0.41428	-0.134768	-0.790971	-0.558251	-0.153312	-0.829285	-0.287364	-0.4862
CGAAAA	A-rich_d2	-0.034474	-0.0613364	-0.00761157	0.620865	0.461306	0.780423	-0.199809	-0.44139	0.0417732	-0.349391	-0.425546	-0.273235	-0.0804727	-0.135338	-0.0256069	0.147089	-0.016229	0.402643	0.170197	-0.0393182	0.356116	0.223256	0.255313	0.150897	-0.0276656	-0.0575754	-0.0996849	0.0516361	-0.0370265	0.128609	0.250917	0.769311	0.212508	0.209704	0.503141	0.570702	0.581335	0.47104	0.0673751	0.317133	0.059031	0.496368	0.439148	0.0673851	0.539868	0.120219	0.021143	0.17852
CGAAGA	NA	-0.0353129	-0.0554553	-0.0151704	0.403442	0.168808	0.638076	-0.380504	-0.643349	-0.117658	-0.28394	-0.342344	-0.225535	-0.0931265	-0.143765	-0.0424885	0.0277372	0.0166493	0.152781	0.0312506	-0.051063	0.0740296	0.0978093	-0.0811512	0.0340532	0.0393916	0.0593695	0.283002	-0.0545979	0.0812697	0.50786	0.105146	0.0118126	0.283927	0.163038	0.315613	0.2318	0.0641177	0.190596	0.535371	0.323833	0.0944806	0.548208	0.606085	0.391192	0.2034	0.526297	0.423268	0.0818143
CGAGGA	NA	0.00771568	-0.0357091	0.0511405	-0.0463072	-0.285014	0.1924	-0.18	-0.283347	-0.076652	-0.243971	-0.513059	0.0251171	-0.0620422	-0.133144	0.00905981	0	0.0100316	-0.0157375	0.0537786	-0.0335155	-0.0223222	-0.0623246	0.0495083	-0.0321461	0.0393902	0.0201653	0	0.05317	0.0030786	0.18682	0.101881	0.127364	0.0125709	0.0269393	0.0215454	0.0603303	0.105984	0.00275989	0.00974323	0.0317527	0.00787462	0.0935591	0.243908	0.0609145	0.00278634	0.0413952	0.127531	0.107113
CGGAGA	NA	-0.000372457	-0.028553	0.0278081	-0.14785	-0.412567	0.116866	-0.0626994	-0.328484	0.203085	-0.283459	-0.572372	0.00545285	-0.112135	-0.187832	-0.0364393	0.0083604	0.044279	-0.00865438	0	0.0159804	-0.0054688	-0.0131043	0.00706553	-0.0309166	-0.020637	-0.0103077	0.00805193	0	0.00277745	0.039208	0	0.0244895	0	0.046496	0	0.0724566	-0.0193166	0	0.027634	0.092361	0	-0.0123084	0	0.0372553	0.00721262	0	0.0372415	-0.0413855
CGGAUG	NA	0.00685641	-0.0358518	0.0495646	-0.253143	-0.602616	0.0963303	-0.157305	-0.312904	-0.00170526	-0.00352798	-2.78137	2.77432	-0.0918526	-0.162371	-0.021334	0	-0.0107207	0.0663363	0.0350578	0	-0.00939403	0.0286375	0	0.0130999	0	0.0165042	-0.00146845	0.0318814	0.0735269	0	0.00106823	0.0470725	0	0	0	0.0101895	0.0180754	0.0112361	0	0.00179206	0.0155607	-0.000419653	-0.0245389	0	-0.000906971	0	0	0.171024
CGGGGA	NA	-0.00864392	-0.131727	0.114439	0.0149646	-0.64592	0.675849	-0.151121	-0.523675	0.221433	-0.150053	-0.291454	-0.00865276	-0.115453	-0.176734	-0.0541729	-0.0040677	-0.0483739	0	-0.125715	0	0.025482	0	0	0	0.0126408	0	0	0	-0.0415379	0	0.152222	0	0.0198848	0.0535907	0.0175127	0.122374	0	0.0270375	0	0	0.0163572	0.0258898	0.033962	0.044624	0	0	0	0.237063
CGUAGA	NA	0.286182	0.191838	0.380525	0.197205	-0.182266	0.576676	-0.279665	-0.900435	0.341106	0.0163212	-0.0298855	0.0625278	-0.0646752	-0.176539	0.0471885	0	-0.0159374	0	-0.00101762	0.124963	0	0	0.0737847	-0.0976206	0	-0.018364	0	0.00592651	0	-0.973366	-0.104535	0.000231677	-0.0150382	-0.195428	0	-0.0232632	-0.00782209	-0.0689917	0	0	0.00233718	-0.318354	-0.0879631	0	0	-0.00400077	0	0.00540174
CUACGU	NA	0.399578	0.304189	0.494967	-0.360526	-0.753451	0.0323993	0.00627598	-0.091679	0.104231	0.0558675	-0.13648	0.248215	0.0224404	-0.0815972	0.126478	-0.0403612	0.0422675	-0.104647	0	-0.049111	-0.141671	0	0.10246	0.0424756	0	-0.0869086	0.0348912	-0.0131356	0	-0.001102	-0.0507557	-0.0199645	0	0	-0.0162763	-0.192962	0	-0.120512	-0.253663	-0.0114132	-0.0694633	-0.147325	-0.117479	0	-0.158006	0	0	0
CUAUAU	UA-rich_d1	0.584834	0.533905	0.635762	0.0639932	-0.138932	0.266918	-0.164309	-0.268056	-0.0605613	-0.180125	-0.345505	-0.0147447	-0.0246616	-0.10261	0.0532868	-0.00120918	0.023606	-0.0593059	0.037027	0	-0.301429	-0.409978	0.0183513	-1.37913	0.0550058	-0.446896	0	-0.0621842	0	-0.34888	-0.37604	-0.0760279	-0.151407	0	-0.56061	0.00292195	-0.398082	-0.067799	-0.0459982	-0.718232	-0.677095	-0.475427	-1.01741	-0.836309	-1.47646	-1.11759	-0.566274	-0.221631
CUAUGU	UA-rich_d2	0.489475	0.40099	0.57796	-0.00676462	-0.675524	0.661995	-0.183697	-0.439086	0.0716908	-0.0332396	-0.244348	0.177869	0.13278	0.0286003	0.23696	0	0.00940463	0.0175864	-0.0656822	0.0665111	-0.290228	-0.0475144	-0.104331	-0.0124663	-0.174008	-0.41484	-0.457862	-0.0195876	0	-0.027405	0.0180746	-0.387217	-0.186375	0	-0.229187	-0.00688858	-0.193773	-0.125157	-0.266142	-0.0575043	-0.0283101	-0.0395794	-0.957263	0	-0.243284	0.0107973	-1.34646	0
CUCUUU	U-rich_d2	-0.0428599	-0.068369	-0.0173508	-0.164849	-0.273268	-0.0564303	0.43906	0.35577	0.522349	0.672793	0.541247	0.804339	0.391329	0.344763	0.437895	0.139889	-0.0169911	-0.0140781	0.00224279	-0.0212206	-0.164549	0.00524588	0.00183221	-0.341385	-0.0254736	-0.0284098	-0.144998	0.0231197	0.0980643	-0.177932	-0.257107	-0.189732	-0.0345506	-0.43925	-0.649666	-0.867215	-0.524334	-0.595594	-0.103778	-0.580238	-0.228016	-0.609025	-0.159463	-0.142789	-0.207741	-0.309265	-0.297415	-0.187962
CUGUGU	NA	0.231319	0.168494	0.294145	-0.370391	-0.916289	0.175508	0.268242	0.175359	0.361125	0.0698164	-0.102022	0.241655	0.167312	0.0907276	0.243897	-0.178269	-0.0253985	-0.00441019	0	0.0471606	-0.0121584	-0.138287	0.0268773	0	-0.0331204	0	-0.0491433	0.0195967	0	0	-0.204988	-0.00418281	0	-0.0565752	-0.145942	0	-0.149524	0.00630001	-0.127374	-0.0980355	-0.07205	0.0196915	0	-0.113883	-0.140297	-0.0619961	0.00391334	-1.06324
CUUCUU	U-rich_d2	-0.0550192	-0.0779284	-0.03211	-0.394761	-0.709888	-0.0796349	0.474437	0.393976	0.554899	0.565549	0.483793	0.647305	0.351416	0.310856	0.391977	0.00690452	0	0.0125884	0.117168	0.0185701	0.0894841	-0.0638184	0.112133	0.108565	-0.350819	0.0622054	-0.564365	0.219415	-0.165677	-0.465663	-0.0968143	0.0286562	-0.527405	-0.300308	0.117444	-0.282694	-0.56247	-0.0982013	-0.787646	-0.425101	-0.34895	-0.263337	-0.0877751	-0.445583	0.113149	-0.383805	-0.193819	-0.511717
CUUUCU	U-rich_d2	-0.0284701	-0.0587759	0.00183576	-0.287605	-0.614835	0.0396253	0.432656	0.353869	0.511444	0.52525	0.448765	0.601734	0.364071	0.313969	0.414173	0.0220722	-0.0567615	0	-0.0794051	0.129248	-0.0267295	-0.0462733	-0.210532	-0.151852	-0.0306681	0.00223084	0.07283	-0.0445983	0	0.0351233	-0.341685	-0.2155	-0.344093	-0.455946	0.0775937	-0.147527	-0.378341	-0.0223269	-0.0429605	-0.700982	0.0167442	-0.0976452	-0.481336	-0.563701	-0.108572	-0.59759	-0.372536	-0.201219
CUUUUC	U-rich_d2	-0.0653118	-0.0867484	-0.0438753	-0.252404	-0.374161	-0.130648	0.386196	0.30174	0.470651	0.647541	0.566232	0.72885	0.401172	0.362959	0.439384	-0.0141142	0.0385946	0.102296	-0.252555	0.00357009	-0.0401923	-0.0135291	-0.00376977	0.0218844	0.122528	-0.160635	0.046047	-0.077869	0.0147248	-0.0784883	-0.166415	-0.0915947	-0.374855	-0.094173	-0.330671	-0.415844	-0.319791	0.0289116	-0.147848	-0.366476	-0.622554	-0.329341	-0.0902868	-0.833464	-0.764956	-0.228894	-1.23324	-0.226353
CUUUUG	U-rich_d2	0.00327197	-0.0302209	0.0367648	-0.408752	-0.654292	-0.163213	0.368036	0.272949	0.463123	0.444499	0.358766	0.530232	0.351481	0.307561	0.3954	0.000696011	0.0860631	0.080164	0.0156867	0.0220332	0.0623548	0.00233286	0.186156	-0.0182046	-0.00533483	-0.130473	0.0611737	-0.0258438	0.0289636	-0.12064	-0.0683152	-0.0831391	0.0261849	-0.118104	-0.0986648	-0.226166	-0.498521	-0.100206	-0.520239	-0.308431	-0.00494832	0	-0.195372	0	-0.0315906	-0.234594	-0.196552	0
CUUUUU	U-rich_d1	-0.0362477	-0.0524299	-0.0200656	-0.299012	-0.432684	-0.16534	0.489827	0.447148	0.532506	0.609083	0.545282	0.672884	0.408342	0.381957	0.434728	-0.0462688	-0.374672	-0.252289	-0.517592	-0.057286	0.00202993	-0.124684	-0.0831116	0.123587	-0.0693041	-0.0465185	-0.0270916	0.0313859	-0.500555	-0.760137	-0.55078	-0.0652237	-0.333819	-0.74844	-0.684606	-0.079849	-1.77592	-1.3544	-1.29669	-1.91156	-1.35046	-1.78812	-0.247712	-0.208487	-0.904301	-1.45084	-0.812542	-1.3326
GAAAAA	A-rich_d1	-0.0185097	-0.0336663	-0.00335304	0.762776	0.653975	0.871578	-0.309189	-0.637145	0.018768	-0.383003	-0.47302	-0.292987	-0.0958725	-0.131469	-0.0602762	0.405393	-0.0505064	0.487635	0.578238	0.205997	0.455546	-0.16275	-0.0552419	-0.118192	0.186347	0.322143	-0.194782	1.0096	0.711313	0.89796	0.433671	0.648716	1.59348	0.763237	-0.0260616	0.779516	0.786051	1.9718	1.43242	0.365606	3.03797	1.45553	1.76372	1.83633	0.429551	0.297813	1.60074	0.539865
GAAAAG	A-rich_d2	-0.039159	-0.0556813	-0.0226367	0.532884	0.40679	0.658978	-0.629477	-0.974077	-0.284877	-0.459302	-0.588691	-0.329912	-0.125755	-0.177701	-0.0738089	0.188786	0.0899352	0.154828	0.152554	0.0436578	-0.255904	0.0304135	-0.0275404	-0.18435	0.183482	-0.0099035	0.0445422	-0.0370842	1.37795	-0.0967036	0.530789	0.661013	1.20171	1.27296	0.210647	0.82262	0.0733276	0.4844	0.77128	1.11448	0.82912	1.28478	0.839505	0.700292	0.72252	0.709804	1.04261	0.432276
GAAAGG	NA	0.00326648	-0.0261873	0.0327203	0.348248	0.0887185	0.607777	-0.243803	-0.552639	0.0650323	-0.363616	-0.512836	-0.214395	-0.312887	-0.412715	-0.213059	0.344009	-0.0722322	-0.00895151	0.108017	0.176326	0.199014	-0.0320081	-0.0891784	0.11731	0.0810574	0.288218	0.12818	0.00352369	0.00604186	0.125656	0.150912	0.101787	-0.154843	0.403863	0.41864	0.316957	0.0633498	0.168085	0.0671459	0.162808	0.878459	0.317907	0.270221	0.513487	0.400352	0.407098	0.0436522	0.210613
GAAGAG	NA	0.000170527	-0.0224764	0.0228174	0.168818	0.0137657	0.32387	-0.175688	-0.432521	0.0811449	-0.488431	-0.671462	-0.3054	-0.0659356	-0.13446	0.00258872	0.219265	0.0948022	0.0539615	0.0975861	0.166624	-0.0666435	-0.0500536	0.374836	-0.218204	0.346093	0.294479	0.0429022	0.386744	0.181233	0.37705	0.424653	-0.0775916	0.687948	0.212864	0.127376	0.639106	0.144298	0.98082	0.506677	0.254652	0.318535	-0.00326624	0.409696	0.920832	0.202922	0.291221	0.384133	0.543611
GAAGGA	NA	-0.0296702	-0.0536533	-0.0056871	0.468626	0.294208	0.643043	-0.294711	-0.458036	-0.131387	-0.384551	-0.582087	-0.187015	-0.122949	-0.185066	-0.0608313	0.00528651	0.0827665	-0.0298284	0.133881	-0.015548	0.00686468	0.085937	0.160127	-0.0283559	-0.060395	0.145993	-0.0596721	-0.00751414	0.397156	0.0626103	0.267791	0.312171	0.459009	0.78617	0.756631	0.701616	0.524711	0.511879	0.489943	0.369883	0.226862	0.782772	0.634436	0.229679	0.206457	0.562767	0.0112614	0.00544134
GAAUGA	NA	-0.0511874	-0.0722025	-0.0301722	0.562378	0.414579	0.710177	-0.217061	-0.365894	-0.0682287	-0.305332	-0.43361	-0.177054	-0.111952	-0.178543	-0.0453605	0.121865	0.129779	-0.103136	-0.00144645	0.196373	0.0909382	0.0324793	-0.0208508	0.0011829	0.295749	0.0731259	0.039188	0.232776	0.627986	0.201024	0.372414	0.117404	0.535514	0.293993	0.628096	0.148239	0.281229	0.153392	0.206774	0.58673	0.122366	0.122758	0.0371835	1.1521	0.342207	0.6874	0.149482	0.179507
GAAUGG	NA	-0.0245772	-0.0501619	0.00100757	0.306082	0.0637935	0.54837	-0.0718387	-0.266736	0.123058	-0.436849	-0.677338	-0.196359	-0.167467	-0.244902	-0.0900316	0.129	0.0130626	0	-0.0665336	-0.0403819	-0.149337	0.0757482	0.0776528	-0.0012543	0.0363872	0.050783	0.149346	0.0590247	0.0287223	0.160722	0.17608	0.269471	0.111525	0.0128601	0.0342108	0.0483167	0.0502703	0.182013	0.152149	0.429856	0.163356	0.0269041	0.0174332	0.287182	0.0434337	0.306957	0.123365	0.486083
GAGAAG	NA	-0.0117465	-0.0358773	0.0123843	0.298238	0.15786	0.438615	-0.195949	-0.558158	0.16626	-0.48985	-0.636649	-0.343052	-0.168653	-0.24442	-0.0928863	0.13432	0.158786	-0.0505054	0.146831	-0.0695264	0.0448494	0.0843288	0.0244545	0.228812	0.0484528	0.0939528	0.343959	0.0320148	0.227706	0.253056	0.541077	0.340278	0.338008	0.510409	0.416497	0.415819	0.392916	0.283645	0.0385676	0.653303	0.250188	0.309858	0.0264631	0.154696	0.231258	0.003492	0.0670872	0.293008
GAGGAG	NA	0.0193584	-0.0072855	0.0460023	0.0739072	-0.368244	0.516058	-0.375591	-0.552113	-0.19907	-0.371219	-0.67818	-0.0642583	-0.181782	-0.257051	-0.106514	0.0095026	0.0324362	0.029197	0.0371357	-0.0602643	-0.122266	0.258006	-0.00841536	0.0398065	-0.0369097	-0.0138533	0.00692727	0.368017	-0.00732693	0.0456972	0.173725	0.171879	0.0830289	0.00995021	0.0687351	0.108948	0.610558	0.0513929	0.148983	0.240128	0.031765	0.279565	0.0800977	0.0454491	0	0.00272741	0.054826	0.0327004
GAGGCG	NA	0.0135715	-0.0367421	0.0638851	-0.123913	-0.436748	0.188923	-0.123982	-0.249521	0.0015572	-0.325799	-0.621701	-0.0298972	-0.197668	-0.337855	-0.0574814	0	0	-0.0111588	0	-0.0142164	0	-0.0217409	0	0	-0.0638937	0.0263987	-0.00763129	0	0.0237773	-0.00330366	-0.0203379	-0.000605669	0	0.042762	0.0173503	0.0248007	-0.0116092	0.108302	0.0894059	0	0	-0.00082803	0	0	0	0	0	0.0106632
GAGGGA	NA	-0.00902488	-0.0365502	0.0185004	-0.109531	-0.316751	0.097688	-0.0067118	-0.457127	0.443703	-0.362076	-0.483957	-0.240194	-0.152818	-0.210155	-0.0954801	0.0114326	-0.0244814	-0.0400616	0	0.00287039	0	0.0462249	0.0313444	-0.030482	0.00498148	0.00111045	0	-0.0477964	-0.00898354	0.0846855	0.0858255	0.0996562	0.0656159	0	0	0.146405	0.0801323	0	0.0356978	0.444261	0.157457	0.278522	0.0577207	0.059519	0.120128	0.118045	0	0.2673
GAGGGC	NA	0.00492357	-0.0419706	0.0518177	-0.321935	0	0	-0.332936	-2.91299	2.24712	-0.922191	0	0	-0.135431	-0.288482	0.0176188	0.00240106	-0.0125294	-0.0155144	-0.0442651	0.0267376	0	0.0493199	0	0	0	0	-0.103295	0.0360034	0	0.0404362	0	0.0377894	0.0597956	0.0974913	0.0683177	0.0048353	0.0367255	0	0	0.120473	-0.0163773	0	0.0777968	0.181979	0.125814	0.0767106	0	0
GAGGGG	NA	0.0297838	-0.0134054	0.0729729	-0.0239661	-3.57029	3.52235	-0.419913	-5.87157	5.03174	-0.57916	-2.35439	1.19607	-0.413239	-0.874158	0.0476798	-0.0288767	0	-0.00155518	0	-0.0107073	0	-0.023306	-0.031641	0.000163522	0	0	0.00908811	0	-0.064702	0	0.19069	0.013964	0	0	0.0909288	0.249799	0	0	0.0703575	0	0.167084	0	0.135248	0	0.0075795	0	-0.0208814	0.0393593
GAUAUA	UA-rich_d1	0.451197	0.404973	0.497422	0.13818	-0.00287915	0.27924	-0.350712	-0.488159	-0.213266	-0.324311	-0.469676	-0.178947	-0.112631	-0.166294	-0.0589682	-0.024447	-0.415412	-0.0164674	-0.343287	0.0229362	-1.4969	0.361185	0.0573346	0.0446139	-1.49056	-0.0487629	-0.12918	-0.0542084	-0.346034	-0.346363	0.0253541	-0.323501	-0.401553	0	0	-0.0437213	-0.0427374	-0.4088	-0.168489	-0.391326	-0.336168	-0.287829	-0.857006	-1.17228	0	-0.158509	-0.815949	-0.336608
GAUAUU	UA-rich_d2	0.121451	0.0945008	0.148401	0.130713	0.0308442	0.230581	0.134683	0.0797825	0.189584	0.105641	0.0519075	0.159374	0.0979751	0.0735014	0.122449	-0.044766	-0.0405245	0.0405609	0.112239	0.0626255	0.210848	0.0194144	0.130174	-0.0749037	0.1481	0.0682717	0.0466119	0.0326665	0.0423655	-0.00249083	0.00992388	-0.305956	-0.0750373	-1.62993	-0.406839	-0.48943	-0.884497	-0.0782559	-0.0689182	-0.156716	-0.178606	-0.405419	-0.152723	-0.20355	-0.0784675	-0.122285	-0.312474	-0.644078
GAUGUA	UA-rich_d2	0.305981	0.244543	0.367419	-0.0941006	-0.311387	0.123185	-0.417125	-0.769478	-0.0647712	-0.0776125	-0.296855	0.14163	-0.0916001	-0.142236	-0.0409645	-0.0912133	-0.116093	-0.525127	-0.208316	-0.355286	-0.195053	0	0	-0.0183158	0.0241293	-0.0668043	-0.0402737	-0.226656	-0.316209	0	-0.105372	0	-0.422065	-0.137222	-0.051437	0	-0.00278987	-0.194709	-0.00824708	-1.1151	-0.0325495	-0.272148	-0.0216485	-0.231911	-0.0605937	-0.154494	-0.490232	-0.383415
GCAGAG	NA	-0.00698291	-0.0396085	0.0256427	-0.0593346	-0.303308	0.184639	-0.139498	-0.36214	0.0831444	-0.180252	-0.318594	-0.0419104	-0.124128	-0.229777	-0.0184797	0.0726511	-0.0288818	0.013706	0.0438634	-0.00646041	0.112539	0.00145558	0	0.0801099	0.0772701	0.0472729	0.176586	0.00792224	0.0100566	0.0450376	0.0153022	0	0.056467	0.030063	0.206389	0.0194187	0.256283	0.00322055	0.261736	0.0298184	0.0419192	0.0670627	0	0	0.290006	0.103982	0	0
GCAGGG	NA	0.0374462	-0.0156125	0.0905048	0.00768507	0	0	-0.21463	-1.1717	0.742443	0	0	0	-0.13275	-0.284827	0.0193277	0	0	-0.0328129	0.00413831	0	0	0	0.0107942	0.0297692	0	0	0.00335036	0.042435	0	0.0177491	0.0372979	-0.0149797	-0.0167235	0.202503	0.027861	0.142733	0	0	0	0.569338	0	0	0.0914578	0	0.0164279	0	0	0
GCAUAU	UA-rich_d2	0.301589	0.256136	0.347042	-0.0463946	-0.205394	0.112605	-0.256765	-0.372773	-0.140757	-0.126091	-0.248316	-0.00386535	-0.0670976	-0.1221	-0.0120953	-0.08836	-0.138983	-0.00390467	-0.00869357	-0.0600918	-0.0261265	0	-0.104837	-1.88401	-0.182513	0	-0.0434814	0.103222	-0.0134483	-0.0518814	-0.494985	-0.123011	-0.000373625	-0.0863149	-0.123482	-0.165173	-0.148819	-0.0479801	0	0.111751	-0.367339	-0.0512477	-0.43392	-0.278163	-0.0558838	-0.0127266	-0.0435051	-0.0515122
GCCGGA	NA	0.0687005	0.027128	0.110273	-0.337491	-0.908324	0.233341	-0.0625197	0	0	-0.00416566	-0.348528	0.340196	-0.0410319	-0.130526	0.0484619	0.00146352	0	-0.0052484	-0.0123561	0.0191767	-0.0417556	0	0.00395812	0	-0.0503959	0	0.0617246	0.0657729	0.00501543	0	0.0195065	0.332569	0	0	0	0.0179947	0	0.187709	0.0102308	0.0111436	0	0	0.052289	0.0163238	0.00414202	0	0.0524601	0.0714324
GCCUAU	NA	0.131656	0.0721233	0.19119	-0.0846261	-0.198512	0.0292594	-0.00704445	-0.212588	0.198499	0.111987	-0.106993	0.330967	0.0378805	-0.00519326	0.0809543	-0.48753	-0.0463782	-0.00125118	-0.278097	-0.142694	0	0.150372	0.0260371	0	0	-0.0356788	0	0	0	0	0	-0.139302	-0.426666	0	0	-0.018935	-0.027628	-0.0168055	-0.00901198	0	0	-0.194691	-0.0418558	0	0.0395564	0	-0.0654258	-0.00582731
GCCUGA	NA	0.00164051	-0.0242101	0.0274911	-0.0886189	-1.02043	0.843194	-0.0678343	-0.303742	0.168073	0.0829358	-0.136214	0.302086	-0.0579552	-0.13026	0.01435	0	0	0.00117787	-0.0130574	-0.0174913	0	0.00705523	0.00389983	0	0.00810448	-0.00532568	0.00072022	0	-0.0198185	0.0086671	0.0218988	0	0	0.00627525	0	0.0189596	0.0281336	-0.0143423	0	0.0771169	0.0435501	0	0.223702	0.00943585	0.0245323	-0.0290497	0	-0.00492368
GCGGAA	NA	0.00879119	-0.0224925	0.0400749	-0.0273952	-0.270618	0.215828	-0.119883	-0.356923	0.117157	-0.357498	-0.758016	0.0430194	-0.118919	-0.227473	-0.0103654	-0.0144832	0.138189	0.0306006	0.0430015	0.16098	-0.0327619	-0.0341547	0	-0.0110797	-0.0739268	0.0543637	0	-0.00587221	0.0528016	0.0318543	0	0.110128	0.131042	-0.00115513	0.0451953	0.0663565	0	0.0256571	0.129638	0.0108835	0	0.225633	0.180858	0.0227966	0.0123617	0	0.000850155	0.0731594
GCGGAG	NA	0.121021	0.0290131	0.213028	-0.42587	-1.6613	0.809556	-0.0189262	-0.541804	0.503952	-0.23872	0	0	-0.26181	-0.552282	0.0286622	0	0.00870755	0	-0.00995437	-0.000821288	0.0120938	0	0.00912757	0	-0.0435968	0	0	0.0546075	0.00811892	0.0075035	0	0	0.000268757	0	0	0.0339394	0.034613	0.0746003	0	0	0.165368	0	0.0610057	-0.0155752	0	0	-0.028547	0
GCGUGG	NA	0.0406539	0.00688746	0.0744204	-0.11737	-0.286677	0.0519364	0.0530698	-0.324316	0.430455	-0.148739	0	0	-0.0988046	-0.20495	0.00734044	0.00204798	0	0	0.00575646	0	0	0	-0.0427626	-0.035011	0	0.00375929	0.0928974	0.0027382	-0.0856953	0	0	0	0	0.129332	0.0145831	0.0291511	0	0.0646402	0	0.0544325	0	0	-0.0553864	0.183648	0.17203	0	0.00408493	0
GCUUUU	U-rich_d2	-0.01141	-0.0361889	0.0133689	-0.225226	-0.412106	-0.0383454	0.343378	0.275592	0.411164	0.467205	0.390974	0.543436	0.268665	0.229471	0.307859	0.0485985	-0.0944458	-0.0294863	0.0304259	-0.0391173	-0.124937	0.0719004	-0.0199219	0.122757	0.0726333	0.0136644	-0.064074	0.00370388	-0.134507	-0.163993	-0.0302691	-0.0927827	-0.106694	-0.131122	-0.245219	-0.680712	-0.521249	-0.619841	-0.2928	-0.300239	-0.274211	-0.173555	-0.107403	-0.393933	0.0688577	-0.17864	-0.352069	-0.144658
GGAAAA	A-rich_d2	-0.0325573	-0.0512466	-0.013868	0.585806	0.450994	0.720618	-0.285544	-0.457244	-0.113843	-0.413762	-0.532963	-0.294561	-0.125877	-0.171286	-0.0804677	0.146444	0.36582	0.154454	0.157892	0.451078	0.0318612	-0.194098	-0.161061	0.493704	-0.0267323	0.168796	0.411684	0.172287	-0.162598	0.206865	0.223617	0.412079	0.669958	0.333607	0.448458	0.441259	0.750759	-0.00810582	0.925786	0.15211	0.592693	0.451646	0.559229	0.457898	0.130151	0.247278	0.537834	0.756029
GGAAAG	NA	0.000407652	-0.0208727	0.021688	0.164493	-0.0213381	0.350324	-0.316734	-0.562696	-0.070771	-0.456482	-0.720811	-0.192154	-0.166664	-0.265865	-0.0674625	0.00577635	0.0086485	0.201144	0.252272	0.239273	-0.0500148	0.137015	-0.0104604	0.0285462	-0.034155	0.312501	0.114132	0.193714	0.343432	0.0171687	-0.0279224	-0.0327194	0.214415	0.380472	0.0492067	0.202835	0.500926	0.336383	0.518603	0.83224	1.14834	0.401996	0.0924447	0.491768	0.38867	0.261412	0.0137305	0.719941
GGAAGG	NA	-0.019525	-0.0494108	0.0103609	-0.0123928	-0.239971	0.215186	-0.120289	-0.315683	0.0751053	-0.365887	-0.591931	-0.139842	-0.141098	-0.277308	-0.00488859	0.0193739	0.0166095	0.175515	0.0577356	-0.036507	0.0504546	-0.0658728	-0.0115197	0.0657971	0.0698168	0.0201827	0.0176151	-0.0211631	0.0376752	-0.0215871	0.587657	0.125247	0.201718	0.199492	0.225511	0.28442	0.0987044	0.183891	0.0953009	0.304633	0.484406	0.233673	0.0492577	0.228677	0.280091	0.112288	-0.0311607	0.158416
GGAAUG	NA	0.00372121	-0.0167126	0.024155	0.250576	0.117722	0.383429	-0.222029	-0.354186	-0.0898731	-0.325919	-0.543219	-0.108619	-0.102275	-0.167708	-0.036842	0.0181692	-0.0319297	0	0	-0.0569357	0.0628785	-0.0499101	-0.0163395	-0.0541818	0.0778932	0.0575282	0.144911	-0.00339547	0	0.129144	0.0500553	0.154019	0.0853633	0.049848	0.226835	0.0841555	0	0.0252954	0.250205	0.158428	0.0427692	0.0304453	0.00170061	0.0572934	0.0852434	0.129723	0	0.0166914
GGACAG	NA	-0.000194687	-0.0302146	0.0298252	0.00349464	-0.116774	0.123763	-0.251664	-0.427089	-0.0762389	-0.175009	-0.536186	0.186167	-0.052364	-0.166657	0.0619288	-0.0199813	0.00963395	0.000366331	0.105336	-0.0319665	-0.00430729	0.025123	0	0	0.135406	0	0.0319714	0.0628523	0	0.0343443	0.0328947	0.0770172	0.00853264	0.128953	0.016319	0.217333	-0.0408815	0	0.127285	0	0.153815	0.0463275	0.0176984	0.187826	0	0.0159192	0	0.00994996
GGAGAG	NA	0.0369616	0.0049099	0.0690134	-0.23692	-0.499062	0.0252215	-0.148153	-0.322962	0.0266564	-0.395304	-0.858983	0.0683748	-0.156155	-0.307477	-0.00483275	-0.00485209	0.00311547	0.0932098	0.0338813	-0.00365638	0.00469041	-0.00763908	-0.0296527	-0.0168793	0.0244437	-0.0920847	0.0222215	-0.0182468	0.0219124	-0.034871	0.084673	0	0.0875998	0.164798	0	0.0354207	0.200536	0	0.153841	0.175257	0	0.032304	-0.0471175	-0.0153537	0.0403323	0.0158708	0.0759391	0.187941
GGAGCC	NA	0.0519945	0.0246522	0.0793367	-0.056995	-1.71889	1.6049	-0.130267	-0.729403	0.46887	-0.103445	-0.363119	0.156229	-0.201686	-0.452304	0.048932	-0.00733128	0.00708944	0	0.00995229	0.00500465	0	0	0.0334248	-0.029297	0	0.0405381	-0.0417126	0	-0.0335598	0.000691904	0	0.0381724	0.0099339	0	0	0	0.10334	0	0.0914521	0	0	0	0.0392497	0.13516	0	-0.0124003	0	0
GGAGGA	NA	0.0272612	0.00269747	0.051825	-0.141084	-0.452566	0.170398	-0.263881	-0.516388	-0.0113735	-0.267868	-0.453994	-0.0817422	-0.145125	-0.250747	-0.039503	0.0535014	0.0843552	0.00138111	0.0824567	0.0060072	0.0513488	0.0178562	0.0341105	-0.0243616	-0.0169591	-0.0575799	0.00556295	0.123906	0.0497187	0.0151785	0.0978236	0.0919414	0.229227	0.198743	0.254813	0.0672457	0.145142	0.289289	0.264757	0.025445	0	0.21687	0.114628	0.0308349	0.149562	0.0585861	0	0.35176
GGAGGG	NA	0.0221944	-0.0417409	0.0861298	-0.180127	0	0	-0.338924	-0.772744	0.0948963	-0.375657	0	0	-0.228089	-0.338649	-0.117529	0	-0.0435611	-0.082723	-0.00782001	0	0	0	-0.0284651	0	0	0	0	0	0.0416096	0	0.104287	0.109726	0.0744604	0.0678405	0	0.0923859	0	0.0667057	0.91429	-0.0271304	0.0565251	0.0560937	0.0575191	0	0.049194	0.134432	0.231032	0
GGAUGC	NA	0.0179458	-0.0124866	0.0483782	-0.100022	-0.295568	0.0955237	-0.0180669	-0.124569	0.0884353	-0.184237	-1.65487	1.2864	-0.0709122	-0.168035	0.0262107	0.0225821	-0.0137639	-0.000869217	0.0574478	0	0.00688055	0.0140061	0.00681387	-0.0136404	-0.0894362	0.00712626	-0.0103977	0.0270736	0.0116981	-0.00852454	0	-0.00209582	0.159044	0.0988647	0	0	0	0.0779458	0.246569	0.319776	0.116032	0.00285066	0.0354815	0.177347	0.0263209	0.0235412	0	0.0961033
GGAUGG	NA	0.0284888	-0.0125836	0.0695613	-0.131002	-0.453473	0.191468	-0.181386	-0.396998	0.0342273	-0.191343	-0.415624	0.0329383	-0.0799495	-0.158841	-0.00105802	0.0134813	0	-0.0817669	0.00496934	0	0.0250726	0.0760092	0.0283696	0.000354517	0	0	0.0269928	0.0046529	0.0161991	0.174809	-0.0292486	0.0606314	0	0.0722484	0.18088	0	0.103529	0.0591514	0.161886	0.00888293	0.115289	0.344494	-0.00790483	0.00126252	0.0254478	0.00552337	0.13799	0.0486356
GGCAAA	NA	-0.016993	-0.0357141	0.00172807	0.450447	0.262905	0.637989	-0.290753	-0.564752	-0.0167546	-0.415013	-0.647173	-0.182852	-0.0652097	-0.14543	0.015011	0.119918	-0.0724072	0.0733065	-0.0716437	-0.0468189	-0.040283	-0.00319934	-0.0196645	0.0402207	0.0839882	0.0262281	0.0144089	0.331855	0.00749253	0.0667018	0.0123527	0.0309581	0.613425	0.234413	0.105802	0.297523	0.469931	0.232865	0.139613	0.178504	0.271759	0.766574	0.232834	0	0.0321502	0.220808	0.0343748	0.0434999
GGCAGA	NA	0.00848733	-0.0212743	0.038249	-0.176841	-0.530276	0.176593	-0.185286	-0.388003	0.0174312	-0.138771	-0.291852	0.014311	-0.189354	-0.287663	-0.0910452	0.00666738	0.00630602	0.0197227	0	0.029217	0.0180832	-0.00114687	0	0.0445108	0.0452902	0.124033	0.00814258	0.161286	0.130846	0.121361	0	0	0.133323	0.150269	0.0882306	0.145744	0.0880454	0.0940464	0.0855668	0.0566792	0.200935	0.144935	0.148628	0.221035	0.0801333	0	0	0.0625046
GGCCGC	NA	-0.0104084	-0.0708205	0.0500037	-0.0726198	-0.30472	0.15948	-0.122892	-0.312002	0.0662184	0	0	0	-0.179932	-0.405783	0.0459191	0	0.00157172	-0.0255767	0.000821717	-0.0112321	-0.0167577	0	0	0	0	0	0	-0.000239767	0	0	-0.00508619	-0.0313156	0	0.029043	0.110791	-0.0455212	0.074141	0	0	0.0189529	0	0.0269871	0	0.0283229	0	0.0276103	0.0434623	0
GGCGCC	NA	0.0461211	-0.00132886	0.093571	-0.346885	-1.32504	0.631267	-0.0330914	-0.122149	0.0559663	0.00362717	-0.0106748	0.0179291	-0.252111	-0.326903	-0.177318	0.00957159	-0.0093867	-0.0260716	0	-0.0252339	0	0	0	0.00886182	0	0.0336904	0	-0.0608259	0.070383	0	0	0	0	0	0.023472	0	0.0372548	0	0	0.0260502	0	0	0	0.00102538	-0.0339142	0	0	0
GGCGGA	NA	0.0382206	-0.00669448	0.0831357	0.0722793	-3.19206	3.33662	0.014822	0	0	-0.195322	-0.836113	0.44547	-0.193792	-0.298171	-0.0894133	0.0361735	0.0477363	0	0.0116809	-0.0101205	0	0	-0.00535161	0	0	0	-0.00603689	-0.0493751	0.0557916	0	0.0564584	0	0	0	0	-0.0415735	0.0828104	0.0825317	0	0.106625	0	0.067527	-5.40579e-05	0.0740464	0	0.0291726	0.0593259	0.227069
GGCGGC	NA	0.0615669	0.0122741	0.11086	-0.251721	-1.03491	0.531473	-0.387298	-1.13657	0.361969	0.0158186	0	0	-0.168604	-0.854195	0.516988	0	0.0246091	0.0289776	0	0	-0.119646	0	0.0287831	-0.0947848	0.00260937	0.056257	0	0	-0.0174743	0.0847972	0	0	0	-0.0068809	0.0338943	0	0	-0.0111974	0	0.038118	0	0	0	0	0	0	0.0656317	0.327388
GGGAAA	NA	0.00585893	-0.016742	0.0284599	0.506133	0.331272	0.680994	-0.374286	-0.664468	-0.0841045	-0.407338	-0.529453	-0.285224	-0.152284	-0.27925	-0.0253192	0.357324	0.00251755	0.0728256	-0.11257	0.0934025	0.0228514	-0.0133396	-0.0131113	-0.00634501	0.0817893	0.326997	0.0885614	0.215741	0.0679895	0.0707097	0.0876323	0.17433	0.0886055	0.108723	0.118688	0.0351413	0.0625219	0.840322	0.0336391	0.0704418	0.128549	-0.0137931	0.569963	0.282403	0.156841	0.486818	0.265806	0.0569469
GGGAGA	NA	-0.0279639	-0.0711211	0.0151934	0.00135259	-0.239872	0.242577	-0.240519	-0.470283	-0.0107546	-0.232065	-0.586835	0.122706	-0.202714	-0.263789	-0.141639	0.0198596	0.0450504	0	0.0191246	-0.00614691	0.153001	0.0892051	-0.0460767	-0.0505665	-0.0264207	-0.00819875	0.120079	0.0476627	0.0706993	0.0236455	0.000733949	0.0561812	0.113953	0.0869955	0.118877	0.17989	0.174244	0.853015	0.0347416	0.0430232	0.27444	0.184141	0.0678783	0.0215583	0.00405171	0.0170008	0.0387271	0.117996
GGGAGG	NA	0.0410712	-0.0208012	0.102944	0	0	0	-0.46314	-1.28993	0.363646	0	0	0	-0.177219	-0.403837	0.0494	0	0.0169984	0.0257783	0	0	0	0.0443828	-0.0267395	0	0.00278269	0.00654707	0.0488811	0	0.124034	0.0747682	0.119201	0.128014	0.000825701	0.118569	0.0136173	0	0	0.790763	-0.023926	0	0	0.111035	0.0144169	0.0376967	-0.00545453	0	0.290518	0.0245502
GGGCAA	NA	0.0329656	0.00609438	0.0598368	0.173649	-0.237284	0.584581	-0.160293	-0.579418	0.258832	-0.383685	-0.586066	-0.181304	-0.111552	-0.255411	0.0323075	-0.00991331	0.0571324	0.0232603	0.0602705	0.0177452	-0.0191843	-0.0471031	0.0326938	-0.0254521	0.0382647	0.102227	4.78063e-05	-0.0140619	-0.0367138	-0.0337788	0.037333	0.234558	0.297872	0.00975929	0.0562506	0.461779	0.099234	0.194936	0	0.019294	0	0.0241371	-0.0169179	0.116246	0.0315154	0.371134	0.0814659	0.0495629
GGGCGC	NA	-0.041358	-0.13513	0.0524137	-0.272833	-1.01199	0.466327	0	0	0	0	0	0	-0.348034	-0.453089	-0.24298	0	0	-0.032921	0	0	0.00913946	0	0	0	0	0.061935	0	0	0	0	0.126083	0	-0.0320229	0.143081	0.0701678	0	0	0.0438205	0.052311	0	0	0	0.0264372	-0.013359	0	0.00107803	0.3721	0.00761334
GGGGAA	NA	0.0101732	-0.0196893	0.0400358	0.301277	-0.0926379	0.695191	-0.242782	-0.536513	0.0509484	-0.343144	-0.422705	-0.263584	-0.130304	-0.171229	-0.0893777	0	0.0799205	-0.103384	0	-0.0142969	-0.0595857	0	0.0257814	-0.0535829	0	0.0296677	0.0951439	0	0	-0.0812739	0.088351	-0.00371087	0.21752	0.031811	0	0.101008	0.221116	0	0.0567775	0.0421719	-0.00448166	0.103993	0.0323707	0.0158164	0.327294	0.0348767	0.00547333	0.135881
GGUGCG	NA	0.0200304	-0.0276118	0.0676727	-0.324451	-0.707836	0.0589341	-0.0679357	-0.201914	0.0660426	-0.0952011	-0.324866	0.134464	-0.211819	-0.341739	-0.0818984	0	0.016875	0	0	-0.0273727	0	0.0058198	0.0932008	0.0032569	0	0	0	0	0	0	-0.115891	-0.0294922	0.0462013	0	0	0	0.0300235	0.0643797	0.0443448	-0.00713414	0	0	0	0.0806987	0.0146704	0.0512084	-0.00935998	0.00244128
GGUGUA	NA	0.250403	0.178224	0.322582	-0.159201	-1.24096	0.922561	-0.534811	-0.865027	-0.204595	-0.185817	-0.362338	-0.00929564	-0.0204736	-0.0902371	0.0492898	0.0508645	0	0	-0.0449515	-0.0992776	0.0406802	-0.0629784	0.132548	-0.0265172	-0.080373	0	0.0190027	-0.11822	0.0201486	0.0253207	0	-0.0194393	-0.0862867	0.0129257	-0.0432998	0	0.0299916	-0.0608507	0	-0.0360171	0.0576086	0	0.0775068	-0.0933126	0	0	-0.0482336	-0.174968
GUAAAU	UA-rich_d2	0.519608	0.466311	0.572905	0.698527	0.537229	0.859825	-0.719742	-1.02888	-0.410606	-0.425614	-0.56527	-0.285957	-0.217811	-0.299592	-0.136031	-0.0781603	0.0122778	-0.406294	0.0541427	0.341913	-0.0333106	0.0294517	-0.000741243	-0.0334876	-0.253111	-0.460559	-0.20445	-0.0721587	-0.15677	-0.170004	-0.504337	-0.239488	0.0452849	-0.987144	-0.59149	-0.813898	-0.0841177	-0.11691	-0.0426678	-0.0386995	0.0284202	-0.0991883	-0.798874	-1.05326	-1.07814	0.0136682	-0.0432528	0.0113824
GUAACU	NA	0.395862	0.293755	0.497969	0.453408	0.188126	0.71869	-0.293247	-0.729922	0.143428	-0.213691	-0.325038	-0.102343	-0.125533	-0.231402	-0.0196638	0	-0.0199082	-0.160838	-0.0650604	-0.0986155	0.106487	-0.170409	0	-0.0431625	-0.0421522	-0.192605	0	0.048629	-0.00722016	-0.0766982	-0.443498	-0.129967	-0.0165901	0.00213866	-1.53013	0	-0.0816521	-0.146679	0	-0.0225375	-0.00285152	0	-0.118309	0.0185329	-0.268016	0.0156575	0.0188554	0
GUAAGA	NA	0.20017	0.137113	0.263226	0.61772	0.434729	0.800711	-0.291327	-0.576605	-0.00604838	-0.31203	-0.462936	-0.161124	-0.196004	-0.275659	-0.116349	0.0302705	0.047753	0.0223591	-0.0506223	0.0488984	-0.118496	0.040239	-0.130481	0.00559266	-0.0108778	0.281324	0.0641755	0.0302987	0.0502547	0.0326948	0.015896	0.119809	0.276598	0.106327	0.282955	0.000565156	0.0706463	0.158789	0.0602239	0.113198	0	0.42661	0.0590185	0.0475584	0.0278833	-0.00738031	0.0807934	-0.0020208
GUAAGU	NA	0.511282	0.415136	0.607429	0.323335	0.0491744	0.597495	-0.447127	-0.78432	-0.109934	-0.394838	-0.662644	-0.127032	-0.211497	-0.334282	-0.0887122	0	-0.0134817	-0.0107113	0.0287286	0.0149974	-0.119214	0	0	-0.341492	0.0497909	0.0943029	-0.206894	-0.245694	-0.0701313	0	0.00626704	-0.261922	0	0	0	-0.0220568	-0.0409254	0.0556023	-0.280793	-0.853121	-0.103029	-0.371746	0.0253051	0	0.0500207	-0.287207	-0.084516	0.0332167
GUACAU	UA-rich_d2	0.570496	0.503877	0.637116	-0.34156	-0.630065	-0.0530553	-0.310914	-0.556809	-0.0650179	-0.124489	-0.275	0.0260219	-0.136509	-0.220303	-0.0527147	-0.0586439	0.0124763	-0.108587	0.151278	0.00248066	-0.133712	0	0	0.0191743	-0.406507	0	-0.0110488	-0.0234449	-0.0467871	0	-0.0506604	-0.0561489	-0.0159369	-0.00648977	-0.0687437	-0.333598	-0.337796	-0.335083	-0.339158	-0.0216524	-0.778868	0	-0.0927496	-0.799764	-0.0382127	-0.125686	0	0
GUACGU	NA	0.558843	0.454764	0.662922	-0.350059	-0.712661	0.0125433	-0.580531	-1.01025	-0.150815	-0.303415	-0.877903	0.271073	-0.147486	-0.325472	0.0305005	0	-0.0496781	0	0	0	0	-0.0251386	-0.336992	0	0.0331525	0.160147	-0.054118	-0.150563	-0.0824097	-0.183753	0.0535634	0.0129412	0.00444966	0	0	-0.391811	0	0.00627856	0	-0.022363	0	0.00393507	-0.108777	0	-0.105546	-0.140825	-0.03208	0
GUACUC	NA	0.283876	0.168754	0.398999	0.153214	-0.0969839	0.403412	-0.166258	-0.436176	0.10366	0.0418701	-0.203133	0.286873	0.0168152	-0.0498049	0.0834353	0	0	-0.0264919	0	0	0.0565573	-0.00181888	-0.000528443	-0.0440861	0	-0.0128036	0.0275676	0.00325978	0.0266232	0.00366264	-0.02053	0	-0.181955	-0.0508236	-0.0992538	0	0.0137599	0	-0.0738461	-0.166307	0	-0.185166	0	0	-1.23702	-0.0662233	0	-0.0793256
GUAGCU	NA	0.333656	0.226274	0.441037	0.132538	-0.152858	0.417934	-0.0371773	-0.105824	0.0314691	0.0550256	-0.00305622	0.113107	-0.0558479	-0.112987	0.00129177	0	0.0196365	-0.0134425	0.0230734	-0.0131772	0.0397109	-0.0205302	0	-0.0454906	0	-0.0116642	-0.0910908	0	0	0.0381866	0	0	-0.00170742	0	0.0285748	-0.133534	0.00654444	0.0233881	0	-0.275729	0.0533555	0	-0.262364	0.0229561	-0.0136223	0	-0.0974401	-0.0208135
GUAGUU	NA	0.483864	0.389101	0.578627	0.1087	-0.125487	0.342887	-0.157722	-0.316651	0.00120735	0.0751499	-0.0478401	0.19814	-0.0682501	-0.145526	0.00902538	-0.00444199	0.0505102	0.0133751	0.0245057	-0.00917182	-0.044742	0.0646985	-0.0118412	-0.0833435	-0.000382902	-0.0130503	-0.0938911	-0.162484	-0.0316054	0	0	-0.358294	0	-0.0586494	-0.192585	-0.0264377	0.0731167	-0.155592	-0.00451457	-0.204499	-0.315513	-0.390258	-0.101633	-0.24862	0	-0.21045	0	0.0615591
GUAUAA	UA-rich_d2	0.525631	0.471513	0.579748	0.762019	0.59836	0.925678	-0.963443	-1.32285	-0.604037	-0.509108	-0.687614	-0.330601	-0.248247	-0.330992	-0.165501	-0.0313413	0.0490768	0.114211	-0.332651	-0.0364841	-0.195323	-0.771021	0.120718	0	-0.0407016	0.00890325	-0.0344659	0.065155	0	-0.171161	0	-0.272568	0.583107	0.0163713	0	-0.600531	2.12064e-05	-0.412452	0.00121526	-0.455081	-0.00940963	0.0373846	0.02014	-0.137423	-0.962019	-0.300224	0	-1.65078
GUAUAG	UA-rich_d2	0.632616	0.551678	0.713553	0.0239966	-0.264781	0.312774	-0.788582	-1.22278	-0.354379	-0.425856	-0.685864	-0.165848	-0.0841038	-0.151487	-0.0167204	0	-0.0263025	0.0519977	0	0	-0.195515	-0.672728	-0.0130722	-0.031538	-0.089843	0	-0.729826	-0.0366256	0	0.0749403	0	0.0311779	-1.05881	-0.0265618	-0.426439	-0.204999	-0.0304242	-0.0868407	-0.382379	0	-0.531954	-0.348655	0	0	-0.117009	-0.205189	-1.03017	-0.294619
GUAUAU	UA-rich_d1	0.631703	0.589999	0.673406	-0.0415422	-0.2277	0.144616	-0.485312	-0.620041	-0.350582	-0.300011	-0.445483	-0.154538	-0.137852	-0.1963	-0.0794033	0.0168295	-0.0497731	-0.282103	-1.36415	-0.080112	-0.681045	-0.710252	0.00838522	-0.150378	-0.0837933	-0.0935359	-0.795255	-0.17407	-0.493856	-0.482687	0.0192307	-0.536283	-2.05835	-0.135173	-0.302181	-0.808875	-1.65075	0	-2.52388	-0.25386	-0.301121	0	-0.954797	-0.276114	-1.40895	-0.0710009	-1.24345	-0.0808183
GUAUGU	UA-rich_d2	0.479719	0.4199	0.539538	-0.237394	-0.565834	0.0910451	-0.243456	-0.428674	-0.0582381	-0.346381	-0.720464	0.027701	-0.178196	-0.267333	-0.0890601	0.239871	-0.0467815	-0.0832264	-0.354894	0.00958639	-0.209345	-0.230521	-0.307767	0.00913439	0	-0.286822	-0.00820356	0.0780735	-0.0652384	0.197059	-0.430763	-0.230656	-0.812305	-0.439156	-0.0532751	-0.019755	0	-0.108076	0	0	-0.461262	-0.352377	0	-0.245259	-0.165109	-0.0203789	0	-0.0249734
GUGAGG	NA	0.0576242	0.0176547	0.0975937	-0.289047	-0.576126	-0.00196731	-0.182005	-0.390822	0.0268124	-0.224051	-2.43263	1.98452	-0.180144	-0.285147	-0.0751417	0.00554902	0.0414259	0.0481113	0	0	0	0.00907213	-0.0496616	-0.100114	0.0406854	-0.0012258	-0.037773	0	0.280144	0	0.0617374	0.0303181	0.077171	-0.0138138	0.0383023	0.027419	0.176624	0	0.0321849	0.15213	0	0.0665587	0	0.039918	0.015468	0.0480961	0.0923421	0.170458
GUGGGC	NA	0.0316258	-0.00368968	0.0669413	-0.364861	-0.76382	0.034098	-0.0426056	-0.403041	0.317829	-0.136484	-1.0152	0.74223	-0.131409	-0.297311	0.0344927	0.0154915	0	0.00767684	0	-0.0128236	0.0362929	-0.00555411	0	0	0.0378694	-0.021171	0.0196559	-0.00580209	0.0288676	0.108437	-0.0167451	0.0906223	0	0	0.0317934	0.0695764	-0.0243372	-0.0556119	0.0683059	0	0.106859	0.0326134	0.0599202	0	0.147316	0	0	0.0528777
GUGUAU	UA-rich_d2	0.423421	0.370437	0.476406	-0.321025	-0.657793	0.0157433	-0.369234	-0.547626	-0.190841	-0.154005	-0.298071	-0.0099392	-0.0902087	-0.170218	-0.0101992	0	-0.0525991	0	-0.00417337	-0.0988175	-0.0171767	0	0	0	-0.168643	0.0266432	0.0235073	-0.171092	0	-0.542442	0	0	-0.0193529	0	-0.602777	-0.0485353	-0.18268	-0.462828	-0.587482	-0.0952901	0	-0.000335012	-0.39881	-0.203864	0	0	-0.140427	-0.186121
GUGUGU	NA	0.201679	0.150041	0.253317	-0.43873	-0.716289	-0.161171	-0.0372447	-0.153354	0.0788643	0.0745167	-0.0526731	0.201706	-0.0583995	-0.108633	-0.00816605	-0.0305702	0	-0.126962	0	0.0164628	0	0.0103907	0.0321812	-0.0172766	0.0291563	0	0	0	-0.00588857	-0.0963828	0.00545543	-0.000472547	0.00560081	0.0126783	-0.125524	-0.147229	-0.135544	0.0548494	0	0.0107562	-0.360496	0	-0.111881	0	-0.0681876	0.060195	-0.058875	-0.0148811
GUUGUA	NA	0.2939	0.230106	0.357695	-0.116802	-0.381123	0.14752	-0.135809	-0.276704	0.00508535	0.108924	-0.0168418	0.234691	0.0609309	0.0117178	0.110144	0.0252032	-0.101023	-0.139592	-0.0550526	-0.00407132	-0.0135498	6.65304e-05	0.042609	-0.587996	-0.424097	-0.101914	-0.307436	-0.0361948	-0.0703097	0.0946335	0.0229341	-0.315639	-0.348782	-0.321668	-0.361065	-0.089448	-0.234628	0.0395061	-0.312015	-0.109426	-0.128994	-0.261186	-0.303985	0	-0.065455	0.0537845	0	-0.504042
GUUUCU	U-rich_d2	0.00805177	-0.0228694	0.0389729	-0.329423	-0.491012	-0.167833	0.418084	0.324801	0.511366	0.547072	0.441909	0.652234	0.299333	0.245913	0.352753	-0.0205234	-0.127333	-0.12245	-0.00271724	0.0278314	-0.000793707	0.0113306	0.117216	0.0994091	-0.116235	-0.0441853	0.239699	-0.0641403	-0.00503216	0.0561298	-0.0982176	-0.00680431	-0.455436	-0.197612	-1.1189	-0.03902	-0.451718	-0.47602	-0.231669	-0.45208	-0.0768431	-0.18756	-1.52172	-0.592922	-0.789536	-0.872972	-0.286387	-0.0372301
GUUUUU	U-rich_d1	0.0423076	0.0179509	0.0666643	-0.135032	-0.270914	0.000850823	0.482505	0.432793	0.532218	0.50429	0.384866	0.623713	0.295222	0.263239	0.327204	0.0557451	-0.107631	0.0937505	-0.102371	0.0926683	-0.121029	-0.0265782	-0.0819752	0.0392957	-0.0612529	-0.158086	-0.0585387	-0.0200643	0.098922	-0.24474	0.0587913	-0.10346	-0.660641	-0.110803	-0.555524	-0.431755	-0.578182	-0.490043	-0.267155	-0.0416528	-0.716637	-0.192649	-0.779748	-0.442465	-0.726552	-0.116808	-1.12811	0.089257
UAAAAA	A-rich_d1	0.102664	0.078163	0.127166	1.05995	0.981313	1.13859	-0.126632	-0.339737	0.0864726	-0.588015	-0.705643	-0.470386	-0.157692	-0.201133	-0.114251	-0.115357	0.136058	0.578679	-0.252893	0.0222265	0.323144	0.13441	-0.375421	-0.0428461	-0.353038	0.0641969	0.0909366	0.297285	0.498017	0.517291	-0.00659788	0.310975	0.400748	0.163396	0.362182	0.194776	0.396038	0.148934	0.655927	0.0934509	0.391629	-0.305848	0.468764	-0.154464	-0.265892	-0.0141303	-0.336994	-0.390474
UAAAAU	A-rich_d2	0.175238	0.140303	0.210173	1.07158	0.984213	1.15894	-0.0154237	-0.153456	0.122608	-0.519418	-0.618958	-0.419878	-0.123084	-0.171199	-0.0749692	0.155456	-0.0449238	-0.0455639	-0.034696	0.0303031	0.155557	0.16782	-0.132033	-0.246547	-0.0553339	0.0418897	-0.12537	-0.307558	-0.238241	-0.476738	0.0682561	-0.0151374	-0.0730287	0.24	-0.500573	-0.00608749	0.0559613	-0.191032	-0.504081	-0.145791	-0.121417	-0.000234128	-0.342125	0.0583538	-0.366386	-0.175318	-0.203531	-0.174614
UAAACA	A-rich_d2	0.175379	0.132757	0.218001	0.899137	0.774172	1.0241	0.0960681	-0.0803637	0.2725	-0.608633	-0.800838	-0.416429	-0.125585	-0.195818	-0.0553515	0.0311177	-0.135661	-0.00431225	0.0246877	0.0966769	0.0144479	0.0243215	-0.0758478	-0.0617567	-0.0259786	-0.0714937	0.0648702	-0.114192	-0.192491	-0.136171	-0.0647854	0.00934405	-0.0210441	0.0631545	0.00269588	0.0607887	0.0920957	-0.155383	0.0268415	0.0582347	0.0519979	-0.0181891	-0.629887	-0.0765794	-0.394245	-0.128206	0.0030859	0.130334
UAAAUA	UA-rich_d1	0.663101	0.628885	0.697318	0.608726	0.501882	0.715571	-0.820959	-1.00314	-0.638781	-0.606456	-0.74266	-0.470252	-0.373348	-0.44926	-0.297435	-0.327101	-0.434722	-0.6661	-0.277253	-0.590363	0.313269	0.178393	0.0574516	0.242858	-0.117195	-1.04117	-1.16408	-1.43114	-1.32228	-0.369534	-1.29664	-2.26016	-0.472585	0.200443	-0.772886	-0.797132	-1.57327	-0.0502127	-1.72258	0	-0.442395	-1.1165	-0.532678	-2.26592	-2.99321	-2.67459	-0.617441	0.0243796
UAACAA	A-rich_d2	0.0774753	0.036773	0.118178	1.0166	0.880571	1.15262	-0.123875	-0.294104	0.046354	-0.338605	-0.426732	-0.250479	-0.0698653	-0.142474	0.00274328	0.0167972	-0.0253888	0.233695	0.0932766	0.195499	-0.0852391	-0.226485	-0.0472249	-0.0187142	0.128272	-0.0148939	0.274749	0.0522113	0.0929605	-0.117831	-0.0597953	0.299228	-0.00463047	-0.186379	0.0736555	0.379001	0.230344	0.182897	-0.00520727	0.127882	0.129225	0.399129	0.0290283	-0.230925	-0.307752	-0.253398	-0.129921	0.0812068
UAAGUA	UA-rich_d2	0.693107	0.630601	0.755613	0.421835	0.222727	0.620943	-0.727256	-1.01885	-0.435662	-0.565198	-0.815978	-0.314417	-0.342229	-0.425393	-0.259065	0	-0.239876	-0.061045	-1.25113	-0.561489	-0.0393442	-0.408533	-0.162909	-0.529887	-0.376326	-0.0802266	0.318826	-0.161841	-0.301616	-0.879116	-0.003983	-1.44005	-0.228398	-0.796076	0.0888068	-1.08673	-0.0839996	-0.890308	0.063187	-0.587677	-0.217668	-0.353674	-0.475328	-0.307129	0	-0.615956	-0.278907	-0.847558
UAAUAA	A-rich_d2	0.231198	0.193272	0.269124	1.24223	1.1652	1.31927	-0.362193	-0.489046	-0.23534	-0.591318	-0.707582	-0.475053	-0.125832	-0.173889	-0.0777745	-0.0334465	0.1504	-0.0197944	-0.239467	-0.0613309	0.0736568	-0.177324	-0.304067	-0.243951	0.0921545	-0.364493	0.17863	0.229762	-0.469449	-0.48671	0.130027	-0.652179	0.0529713	0.223588	-0.479934	-1.34902	-0.348365	-0.194259	-0.0641458	-0.346634	-0.445508	-0.658552	-0.735739	-0.94751	0.214754	0.177044	-0.421263	-0.559875
UAAUAU	UA-rich_d2	0.411534	0.371905	0.451163	0.870881	0.793665	0.948098	-0.0507478	-0.143432	0.0419363	-0.291543	-0.369611	-0.213475	-0.16155	-0.22072	-0.102381	-0.0219285	-0.740566	0.00417741	0.0232271	0.0516226	0.0759483	-0.0407926	-0.0111667	-0.0752772	-0.659352	0.0814856	-0.219271	-0.705948	-0.862672	-0.733305	-0.426161	-0.165859	-1.11273	-0.254357	-0.344332	0.549895	-0.163094	-0.231254	-1.26489	-0.742328	-0.48056	0	-0.784631	-0.526912	0	0.378152	-0.253161	0.0994207
UAAUUA	UA-rich_d2	0.456564	0.404834	0.508294	0.829692	0.733619	0.925765	-0.15327	-0.274732	-0.0318075	-0.44494	-0.561847	-0.328033	-0.210474	-0.289912	-0.131037	-0.150297	0.0276434	-0.0117277	0.00611982	-0.00499482	-0.083217	-0.0790416	0.133392	-0.59399	-1.02643	0.0286721	0.000391766	-0.123532	-0.381737	-0.252302	0	-0.468875	-0.473053	-0.875957	-0.181977	-0.205489	-0.97047	-1.10472	-0.247577	-0.841454	-0.962327	-1.21152	-1.40971	-1.40556	-0.281592	-0.47559	-1.2748	-1.27048
UAAUUC	NA	0.165776	0.112301	0.219251	0.795537	0.663812	0.927262	0.214339	0.0917326	0.336946	-0.0607899	-0.148151	0.0265709	-0.00801843	-0.0566232	0.0405863	-0.0224443	0.0738169	0.0278961	0.0113663	-0.016472	0.00421541	-0.452142	0	0.0580153	-0.0763859	0.0351598	0.000462128	-0.0319681	-0.418888	-0.0245947	-0.145628	0	-0.0429556	0	-0.016602	-0.28511	-0.129417	0.0282617	-0.514062	-0.0313441	-0.567783	-0.175492	-0.156671	0	-0.190874	-0.239311	-0.00173905	-0.0903882
UACAAA	A-rich_d2	0.108224	0.0762711	0.140177	0.911096	0.754532	1.06766	-0.432789	-0.62784	-0.237738	-0.371728	-0.466927	-0.276528	-0.0701896	-0.122742	-0.0176374	-0.0383186	0.106752	0.181515	0.160574	-0.109176	-0.0192779	0.0324373	0.262343	0.199931	0.0371189	0.24949	-0.0958411	0.27488	0.130725	-0.401557	0.707652	-0.0568609	0.149334	-0.178226	0.0943737	0.153133	0.171088	-0.0165477	0.0278941	-0.015406	0.126656	0.0758749	-0.0354875	-0.134004	-1.18881	-0.21872	-0.11737	0.187082
UACAUA	UA-rich_d1	0.678739	0.641221	0.716257	0.221539	0.0227776	0.4203	-1.03659	-1.24993	-0.823237	-0.406957	-0.520465	-0.293448	-0.216425	-0.284811	-0.148038	0	-0.1025	-0.448737	-0.11781	0.195269	0.0594521	-0.166844	-0.414103	0.444403	-0.487715	-0.207864	-0.297711	0	-1.05683	-0.257776	-1.19634	-0.251658	-0.51627	-1.80535	-0.0505382	-0.591249	-1.36594	-0.20207	-1.0581	-2.21907	-0.718726	-1.0718	-0.800959	-0.14293	-0.839528	-0.149189	-0.133676	-0.198594
UACGUA	UA-rich_d2	0.68375	0.622698	0.744802	-0.0334693	-0.302695	0.235757	-0.85231	-1.12779	-0.576835	-0.440072	-0.599793	-0.280352	-0.16672	-0.260646	-0.0727936	-0.00330746	-0.0477873	0.0964408	0	-0.0678754	0	-0.117172	0	-0.426084	0	0	0.0391068	-0.0970179	0	0	-0.0143164	-1.21967	0	-0.0819178	0.0360153	0	-0.589253	0	-0.0663231	-0.00125553	0.00246215	0	-0.0860036	-0.506464	0	0	-0.153913	0
UACGUG	NA	0.220187	0.15385	0.286523	-0.292602	-0.515786	-0.0694178	-0.317445	-0.597129	-0.0377601	0.12664	0.0185111	0.234768	-8.12392e-05	-0.0577573	0.0575948	-0.0147696	0	-0.0258093	-0.0992617	0	0.0104551	-0.0138282	-0.0279494	0.0673591	0	-0.0928944	0	-0.0223908	-0.142774	-0.0569996	-0.139825	0.0218818	-0.439494	-0.137235	-0.0901775	-0.00867347	0.00355863	0.0501248	-0.0544284	0.0101125	-0.0458551	0.0258552	-0.0275662	0.00343972	-0.0447398	-0.112423	0	-0.075918
UAGAUA	UA-rich_d1	0.598644	0.547288	0.649999	0.145045	-0.0485741	0.338664	-0.798146	-1.04433	-0.55196	-0.432504	-0.587839	-0.277169	-0.209326	-0.308776	-0.109875	-0.227357	0.0294226	0.0705141	-0.137856	-0.667859	-0.211964	0.000400133	-0.296562	0.00592191	-0.563683	-0.609383	-0.168501	0.100173	-0.0733865	-0.102241	-0.283019	-2.40266	-1.27365	-0.0702882	-0.444216	-1.4632	-0.0374064	-0.59615	-0.289795	-0.54722	-1.94156	-0.129248	-0.33694	-0.0778967	-1.27524	-0.0755401	-0.871189	-0.359859
UAGAUC	UA-rich_d2	0.237882	0.16225	0.313514	0.0901361	-0.0647895	0.245062	-0.240585	-0.464876	-0.0162945	0.0213607	-0.0532943	0.0960156	-0.0365796	-0.191724	0.118565	-1.88161e-05	-0.0823599	0	-0.0779476	0	-0.0904845	0	0.0120365	-0.12093	-0.0349675	0	-0.00297275	0	0	0	-0.0736773	-0.0388032	-0.0985821	-0.457209	0.0125495	-0.0515316	-0.0173865	-0.0407861	-0.103865	-0.141732	0	-0.261146	-0.221827	-0.03492	-0.201778	-0.715758	-0.0216629	-0.0624537
UAGAUG	UA-rich_d2	0.237429	0.179132	0.295726	0.227986	0.0760549	0.379916	-0.207809	-0.395656	-0.0199611	-0.0600866	-0.1716	0.0514264	-0.0310855	-0.0802525	0.0180816	-0.0978665	-0.00225971	0.0248197	-0.101444	-0.0128942	0.00329465	0.114354	-0.00152968	0.0276728	-0.0921477	-0.00772476	-0.0133502	0.0189431	0.0638445	0.0475838	-0.0563686	0.0167939	-0.021947	0.0180418	-0.0717041	-0.0839669	-0.422483	-0.67604	-0.013927	0.0202208	-0.0570214	0	0.0358533	0	0.012951	0.0650391	-0.0118643	-0.294093
UAGGUA	UA-rich_d2	0.452676	0.368122	0.53723	0.121337	-0.278255	0.52093	-0.644148	-1.08063	-0.207663	-0.30653	-0.499749	-0.113312	-0.169224	-0.315734	-0.0227148	0	-0.0177812	0.0510743	0	-0.374559	-0.0260373	-0.322567	-0.0174783	0.057172	0.0888784	-0.211577	-0.0313588	0	-0.406661	-0.16727	0	-0.0875347	0	-0.256096	-0.299989	-0.14701	-0.611879	-0.738896	-0.168682	0.0483496	-0.350311	-0.187382	0.060121	-0.0572905	-0.352251	-0.0123573	-0.0830397	-0.75365
UAGUAU	NA	0.497668	0.432987	0.562349	0.290579	0.0638662	0.517293	-0.19032	-0.341935	-0.0387055	-0.0841418	-0.229119	0.0608357	0.0397165	-0.018776	0.0982091	0.0240037	-0.135924	-0.0196048	0.0143202	-0.0523631	-0.148104	0	-0.261532	-0.27916	-0.0764245	-0.153217	0.0074519	0.0773826	-0.0947211	0.0220073	-0.179969	0.00538471	-0.120753	-0.0511427	0	0.0176965	-0.552916	0	-0.69435	-0.302069	-0.16097	-0.0899586	-0.305942	-0.0137393	-1.58675	-0.0957574	-1.14343	0
UAUAAA	UA-rich_d1	0.481862	0.446264	0.51746	0.888847	0.800801	0.976894	-0.758136	-0.95407	-0.562202	-0.54589	-0.651239	-0.440541	-0.215024	-0.280701	-0.149347	0.162346	-0.0733154	-0.166379	-0.0320413	0.0106397	-0.09905	-0.266235	-1.36769	-0.0115615	-0.270956	-0.728173	-0.343867	0.0658448	-0.410998	-0.044889	-0.502152	-0.0733065	-0.141271	-0.381049	-0.460179	-0.444245	-0.0927696	-0.269091	-0.288755	-0.450197	-0.822739	-0.0177249	-2.62675	-1.706	-0.560328	-0.984155	-0.569039	-1.06896
UAUAAG	UA-rich_d2	0.492339	0.427819	0.556858	0.627311	0.451895	0.802727	-0.810225	-1.2687	-0.351748	-0.537153	-0.726144	-0.348162	-0.249144	-0.351944	-0.146344	0.0413392	-0.0505045	-0.0272474	-0.156618	-0.151558	-0.305633	-0.756505	-0.0780386	-0.0628819	-0.300819	0.0680986	0.0630934	-0.128497	0	-0.0256251	-0.0486455	0	0.0240246	-0.341898	0.0629449	0.0412397	-0.141236	0	-0.0713858	0	0.0500799	-0.0461058	-0.176864	-0.10629	0.0411823	-0.930893	-1.98441	-0.131065
UAUAAU	UA-rich_d2	0.568553	0.524874	0.612232	0.895589	0.810792	0.980386	-0.402795	-0.557707	-0.247884	-0.437723	-0.598828	-0.276619	-0.220523	-0.282005	-0.159041	0.0245	-0.0193613	-0.0263069	0.173751	-0.831618	-0.394278	-0.134988	-1.11328	0.245357	-0.0661807	-0.730287	0	-0.494973	0	-1.0533	-0.0132634	-0.222595	0	0.500877	-0.0836305	-2.96748	-1.4731	0.0175593	-0.661411	-0.122383	-0.471356	-1.54246	0.0203765	-0.202158	-0.00199916	-2.34099	-0.0886196	-1.65088
UAUAGA	UA-rich_d1	0.589402	0.53772	0.641084	0.496137	0.325859	0.666415	-0.758012	-1.02785	-0.488171	-0.331666	-0.480149	-0.183183	-0.189852	-0.279923	-0.0997801	-0.0317432	-0.0286434	-0.0487798	-0.0547168	0	0.0302754	-0.116307	-2.40583	-0.0174365	-0.0752603	0	-0.0754604	-0.885441	-0.248443	0	-0.698352	0	0	-0.318346	-0.411568	-1.39608	-0.35758	-0.0255026	-2.12558	-0.469271	-0.334996	0.0812531	-0.193126	-0.566919	-0.00337497	-0.36107	-0.376551	-0.0944543
UAUAGC	UA-rich_d2	0.547016	0.465597	0.628435	0.14629	-0.0962809	0.38886	-0.25222	-0.48176	-0.0226797	-0.163685	-0.38323	0.055859	-0.120658	-0.215807	-0.0255093	0	-0.0475844	-0.0262833	0	-0.165634	0	-0.397578	0.0621297	0.160652	0.0176484	0	0.00311703	0	-0.0219151	-0.473051	0	0	0.150726	-0.0219686	-0.109752	0	-0.45624	-0.0842309	-0.0421335	-0.0863759	-0.234923	-0.810571	-0.407944	-0.099845	-0.620859	0.111984	-0.117962	-0.0187456
UAUAGG	UA-rich_d2	0.524888	0.436591	0.613186	-0.306048	-0.560775	-0.051322	-0.415553	-0.633135	-0.19797	-0.408979	-0.818322	0.000363637	-0.102556	-0.213412	0.00829883	-0.0240422	0	0.013883	-0.163921	-0.000836549	-0.0225458	0	0	-0.198377	0.133669	-0.0875208	-0.119472	0.0381358	-0.064486	-0.0154702	0.00101925	-0.548022	-0.164512	-1.46354	-0.370222	-0.615367	0	0	0	-0.49484	-0.206711	-0.590615	-0.010619	-0.304155	0	-0.646502	-0.626112	0
UAUAGU	UA-rich_d2	0.711674	0.645762	0.777586	0.448281	0.273818	0.622743	-0.422696	-0.618692	-0.2267	-0.219098	-0.374833	-0.0633642	-0.125262	-0.20877	-0.0417545	0.00872477	0.0186888	0.0581043	0.00481213	-0.0369191	-0.178062	0.0796213	0.162661	-0.0733856	-0.301853	-0.0382091	0	-0.796937	-0.0531469	-0.436916	0	-0.564382	-0.374713	-1.45185	-0.154699	-0.611146	0	-0.0464824	-1.08554	-0.00649681	0	-0.977247	0	-0.0183199	0	-0.786583	-0.0247255	-1.03814
UAUAUA	UA-rich_d0	0.629716	0.607993	0.651438	-0.0771644	-0.207919	0.0535898	-0.91147	-1.03369	-0.789251	-0.653471	-0.781165	-0.525778	-0.298211	-0.346864	-0.249558	-0.10266	-0.709048	-0.0420533	-0.478268	-1.64739	-0.813112	-1.81957	-1.40186	-0.467708	-1.74728	0.095429	-3.33797	-1.48189	-1.00931	-0.895615	-0.873943	-2.09967	-0.900536	-2.61452	-0.335166	-1.40469	-3.54339	-1.00413	-2.66309	-0.584685	-3.14611	-0.939835	-0.574862	-3.13183	-0.24295	-1.7155	-1.77392	-0.682261
UAUCUA	UA-rich_d1	0.394242	0.345447	0.443038	0.318888	0.13699	0.500786	-0.375985	-0.553076	-0.198893	-0.0767526	-0.233354	0.0798489	0.0413509	-0.00367203	0.0863738	-0.0545895	0.0371546	0.0488127	-0.00069074	-0.256502	-0.271404	-0.00866226	0	-0.131618	-0.0143707	-0.916481	-0.304166	-0.0554007	-0.0965761	-0.124817	0.0473024	-0.29463	0	-0.264288	-0.438082	-0.0825843	-0.120555	-0.515664	-0.108418	-0.646916	-1.52798	-0.465477	-1.22669	-0.0791938	0	0.0162119	-3.04811	-0.160985
UAUGUA	UA-rich_d1	0.675096	0.635706	0.714486	0.310979	0.0964098	0.525549	-0.959637	-1.17105	-0.748226	-0.526598	-0.702838	-0.350357	-0.312518	-0.385961	-0.239076	0.0170636	0.245357	-0.154992	-0.466684	-0.940522	0.008251	-0.261557	-0.477385	0.0772886	-0.0352967	-0.328223	-0.516959	-0.381353	0.141937	-0.150573	0.0749104	0.0770109	-0.0579807	-0.762933	0	-1.43446	-0.0956399	-0.191431	-0.247994	0	-0.623832	-1.91263	-1.26007	-0.400678	-1.42039	-0.390607	0	-1.42193
UAUGUG	UA-rich_d2	0.231206	0.18773	0.274682	-0.317856	-0.509528	-0.126184	-0.133794	-0.22476	-0.0428274	0.0368873	-0.0744404	0.148215	-0.00070082	-0.0599665	0.0585649	-0.0472261	0.0072589	-0.00388791	0.00319898	0.124797	-0.0188498	0	-0.049242	-0.0836372	-0.0537188	-0.00449606	-0.119194	-0.0269291	-0.00402934	-0.00267323	0.0408696	-0.448616	0	0.00947263	-0.0146549	-0.085822	-0.0034092	-0.181984	0	-0.0620948	-0.0361975	-0.0856631	-0.350596	-0.0375289	-0.175361	-0.00748843	-0.464318	-0.529853
UCGAGG	NA	-0.0020554	-0.0243458	0.020235	-0.108686	-0.294608	0.0772368	-0.055722	-0.131936	0.0204922	0.040958	-0.188493	0.270409	-0.0484086	-0.104384	0.0075668	0.00208895	0	0.0165362	-0.048383	0	-0.0158664	-0.043402	-0.0151145	0	0	0.0453796	0	0	0	0	0.227799	0.02957	0.0316437	0.0205619	0.0347513	0.00862174	0.0180023	0.326958	-0.000968139	-0.00777514	0	0.198856	0.0163644	-0.00147066	0	0	0.0722643	0
UCUAUA	UA-rich_d1	0.511439	0.462264	0.560615	0.140344	-0.0858312	0.366519	-0.348773	-0.489926	-0.20762	-0.0436674	-0.127987	0.0406521	-0.0258691	-0.0978433	0.0461051	-0.0618614	-0.0372236	-0.177028	-0.195835	-0.912046	-0.808246	-0.177833	-0.402333	-0.177063	-0.92908	-0.764981	-0.208251	-0.499668	-0.483812	-0.0516586	0	-0.111799	0.00764484	-0.415037	-0.603806	0	-0.194824	0	0	-0.74146	-0.433627	-0.152164	-0.89186	-0.450055	-0.116958	0	-0.677951	0.0102927
UCUCUU	U-rich_d2	-0.0593327	-0.0858398	-0.0328257	-0.253858	-0.462378	-0.0453381	0.501405	0.409794	0.593016	0.715689	0.597925	0.833453	0.370815	0.326554	0.415076	0.0110293	-0.0077087	-0.00299415	0.0927	-0.0952053	-0.078136	0.049801	-0.218754	0.018545	0	-0.0332459	-0.0271986	0	-0.361265	-0.236868	-0.168601	-0.0135329	-0.168472	-0.50001	-0.526195	-0.573098	-0.325459	-0.0835463	-0.314799	-0.269569	-0.460739	-0.369307	-0.125793	-0.0511291	-0.028241	-0.378169	-0.209645	0
UCUUCU	U-rich_d2	-0.0262749	-0.0496556	-0.00289422	-0.336221	-0.520605	-0.151836	0.507954	0.410394	0.605514	0.58196	0.493377	0.670543	0.362364	0.319775	0.404953	-0.0262999	-0.0785447	0.0923451	0.164626	-0.00845787	0.0175543	-0.178237	0.0146631	-0.06736	-0.0688221	-0.0600584	0.036851	-0.0176356	-0.221782	0.0943435	-0.49143	-0.460778	-0.245117	-0.0244125	-0.211553	-0.504045	0.022061	-0.345776	-0.879746	-0.183251	-0.49629	-0.285371	-0.0268941	0.16742	-0.363862	-0.370691	-0.310673	-0.444564
UCUUUC	U-rich_d2	-0.0808133	-0.102979	-0.0586475	-0.419961	-0.679165	-0.160757	0.475907	0.365561	0.586253	0.663083	0.580195	0.745971	0.351659	0.308274	0.395044	0.00826524	-0.0531545	-0.447605	-0.0441713	0	0.097914	-0.0850376	-0.101654	-0.0865238	0	0.202687	0.0519372	-0.144916	-0.402514	-0.0150571	-0.533219	-0.5029	-0.311741	-0.0383258	-0.20975	-0.0586558	-0.411158	-0.0398616	-0.0638072	-0.195273	-0.10902	-0.396757	-0.423932	-0.00334436	-0.16702	-0.343801	-0.4792	-0.355705
UCUUUG	U-rich_d2	-0.047594	-0.0729545	-0.0222335	-0.316552	-0.480989	-0.152116	0.42206	0.307932	0.536189	0.459531	0.371401	0.54766	0.332952	0.289264	0.376639	-0.0525882	0.118417	-0.00268039	0.00544569	0.0298192	0.244431	0.0411108	0.0374931	-0.00536656	0.00190579	0.0457345	-0.0937737	-0.156082	-0.326651	-0.0940984	-0.129525	0.0633993	-0.408306	-0.0670865	-0.486041	-0.176506	-0.546002	-0.18826	-0.536539	-0.321225	-0.253222	-0.354895	-0.264639	-0.59889	-0.174347	-0.300201	-0.0309407	-0.311692
UCUUUU	U-rich_d1	-0.0508844	-0.0702044	-0.0315643	-0.291277	-0.431605	-0.150949	0.540683	0.486042	0.595324	0.708445	0.643068	0.773822	0.425799	0.396134	0.455464	-0.108337	0.0324432	-0.157861	-0.00518294	0.128861	-0.243541	0.0863368	0.116074	-0.233117	-0.469295	-0.044761	0.0293411	-0.276798	-0.171213	-0.0461307	0	-0.19644	-0.366376	-1.00164	-1.20128	-1.14119	-0.243828	-0.430963	-0.835987	-0.470975	-0.529023	-0.825842	-0.35838	-1.04524	-1.13441	-1.80376	-1.21663	-1.39096
UGAAAG	NA	-0.0371564	-0.059318	-0.0149948	0.446607	0.306626	0.586588	-0.222104	-0.414789	-0.0294186	-0.328044	-0.435033	-0.221055	-0.0786639	-0.125096	-0.0322316	-0.0532319	-0.0286572	0.0317516	-0.0433374	0.324414	-0.0874684	-0.0907888	0.106593	0.521527	0.490918	0.0828782	-0.0153409	0.116744	0.638777	0.0576373	0.161154	0.265283	0.469997	0.131396	0.613977	-0.00387931	0.0737686	0.908115	0.577662	0.282165	0.713731	0.429224	0.592394	0.437335	0.404387	0.438438	1.22969	-0.00282793
UGAGGA	NA	0.00851266	-0.0134187	0.030444	-0.112395	-0.370862	0.146071	-0.201239	-0.313744	-0.0887345	-0.277583	-0.613525	0.05836	-0.0663003	-0.139377	0.00677659	0.0480709	-3.66362e-05	0.0406298	-0.025091	-0.00668896	0.170836	0.0307101	-0.0521059	-0.0109116	0.338963	0.0848409	0.30433	0.160823	0.0682398	0.520815	0.0843413	0.126027	0.162437	0.152869	0.297739	0.300741	0.0440305	0.0912834	0.11596	0.254131	0.209702	0.331103	0.0838364	0.156019	0.24138	0.0867799	0.254776	0.119643
UGGCGG	NA	0.0193998	-0.0280207	0.0668204	-0.28754	-0.582455	0.00737448	0.0653399	-0.157447	0.288127	0.0186044	0	0	-0.0821569	-0.19996	0.0356463	0.0298075	0.0406215	0.0112494	0	-0.109294	0	0.00741402	0.0136855	-0.000424312	0.090224	-0.0033365	-0.012539	0.0503474	0	0.0294796	0	0.0225166	0.00333823	0	0	0.209481	0.194111	0.00911568	0	0.0236436	0	-0.0200921	0.0528746	0	0.00499649	0	0.116598	0.0799501
UGGGGG	NA	-0.0205251	-0.171679	0.130629	0.0925774	-1.09175	1.27691	0.155295	0	0	0	0	0	-0.2009	-0.365949	-0.0358511	0.0178737	0.0305324	0	0.0295444	0	-0.0401903	0	0.000960416	0	0.00128329	-0.0120088	0.101696	-0.0779973	0.388817	-0.0480462	0.264502	0	0	-0.0473464	0	0.0123147	-0.0330828	0.0472509	0.0384251	0.0143983	0.131751	0	0	-0.0153186	-0.00938891	0	0.00167739	0.232986
UGGUGG	NA	-0.0197217	-0.0597122	0.0202688	-0.213888	-0.595638	0.167862	0.103286	-0.0263884	0.232961	0.159426	-0.230365	0.549217	-0.111647	-0.157553	-0.0657419	0.0115332	-0.014438	0.00874265	-0.0345393	-0.0285936	-0.129015	-0.0992941	-0.052538	-0.0228259	0.0398024	0.0236088	0.376311	0.0572407	0.0576158	0.0229698	0.0338664	0.300141	0.121698	0.59564	0.0563141	0.405866	0.0920742	0.101321	0.0819629	0.129119	0.109406	0.291042	0.416195	0.240648	0.0784799	0.10187	0.224753	0.0805452
UGUAAC	NA	0.355853	0.282168	0.429538	0.689106	0.497593	0.880619	-0.408825	-0.872875	0.0552258	-0.221647	-0.352589	-0.0907055	-0.194061	-0.327579	-0.0605431	0	0	0	0	-0.067725	-0.273148	0	-0.131823	-0.0178816	-0.186859	-0.550689	-0.231632	0	0	-0.406124	-0.0219686	-0.24295	0.0157545	0.0451714	0	0.0687355	-0.0695356	0	-0.0400381	-0.0170489	-0.0735231	-0.624811	0	-0.730409	-0.218172	-0.171564	0	0
UGUAAG	NA	0.392553	0.310758	0.474348	0.197538	0.0138439	0.381231	-0.647134	-0.985418	-0.308849	-0.311351	-0.501177	-0.121525	-0.142122	-0.229531	-0.0547138	0.0129643	-0.0222003	0.00630164	-0.082414	-0.179222	-0.0272475	0	-0.0490551	0	0.0913588	-0.0267615	0	0	-0.0125928	0.0123405	0.00183325	0.0141696	0	0.0103614	-0.0373104	-0.0915103	0	-0.031151	-0.158708	-0.0985027	0	0	0.0109934	0.0385121	-0.0862797	0	0	-0.082631
UGUAUA	UA-rich_d1	0.6387	0.60076	0.67664	-0.0212122	-0.216126	0.173702	-0.896938	-1.07891	-0.714962	-0.363111	-0.48151	-0.244712	-0.152015	-0.20714	-0.0968906	0.0197222	-0.280348	-0.070517	-0.0860295	-0.599127	-1.77453	0.116528	-0.00058244	-0.10664	-0.00807025	-1.45703	-0.103807	-0.220782	-0.101497	0.0363664	-0.339106	-0.0750676	-0.160164	-0.602317	-0.67341	-1.2732	-0.446761	-3.73583	-0.169761	-0.815122	0	-0.475828	0	-1.94508	-0.803777	0	-2.11404	-1.14313
UGUGUA	UA-rich_d2	0.454972	0.404233	0.50571	-0.156891	-0.456069	0.142287	-0.567575	-0.757084	-0.378066	-0.147271	-0.245157	-0.0493856	-0.0812711	-0.147212	-0.01533	-0.0493842	-0.0438185	0.112349	-0.204023	-0.0213238	-0.0194866	0	0	-0.161502	0.034074	-0.183558	-0.112326	0	-0.940042	-0.145556	-0.0538502	-0.169945	0	-0.0690964	-0.661462	-0.31492	-0.39669	-0.584143	-0.0751229	-0.130213	-0.0861347	-0.37153	0	-0.0537153	0	-0.136821	-0.208608	-0.415039
UGUUUU	U-rich_d1	0.0152489	-0.0079325	0.0384303	-0.311356	-0.479596	-0.143116	0.458602	0.399168	0.518036	0.533692	0.446505	0.620878	0.313763	0.279864	0.347662	-0.0701586	0.0177587	-0.143105	0.177034	0.260279	0.00132822	-0.537367	-0.0699193	-0.145691	0.139566	-0.0115552	-0.0684308	0.0783576	-0.415864	-0.549762	-0.237336	-0.587495	-0.0409562	-0.641499	-0.204355	-0.866646	-0.460424	-1.91128	-0.578604	-0.115284	-0.524109	-0.50397	-0.230134	-0.668277	-0.0784195	-0.830155	-0.301518	-0.28679
UUAAAA	A-rich_d2	0.0260372	-0.00108628	0.0531606	1.08047	0.983751	1.17719	-0.187574	-0.319079	-0.0560685	-0.38046	-0.453674	-0.307246	-0.0255439	-0.0631266	0.0120389	0.241865	0.134764	0.00124284	0.109464	0.127983	0.0220154	-0.28072	0.0037826	0.0247715	0.143114	0.3276	0.113342	0.629344	0.298357	0.25158	-0.0240184	-0.052741	0.151576	0.18855	0.119877	0.266327	0.145109	0.0235515	0.156011	0.149316	-0.117368	-0.154111	0.095349	0.110941	-0.0183148	-0.0731066	0.154031	-0.570342
UUAAUA	UA-rich_d2	0.307599	0.266696	0.348502	0.97402	0.895498	1.05254	-0.341321	-0.462815	-0.219827	-0.362255	-0.464023	-0.260486	-0.105351	-0.157422	-0.0532796	0.129847	-0.0172454	-0.115477	-0.0443112	0.0528353	-0.0304105	-0.310456	-0.163601	-0.20327	-0.108241	-0.241139	-0.18302	-0.0920068	-0.161494	0.199835	-0.0687099	-0.158251	-0.411085	-0.0843519	-0.182577	-0.359401	-0.636534	-0.206597	-1.28102	-0.701506	-0.0411865	-0.17854	-0.749909	0.152022	0.345149	-1.08258	-0.409725	-0.404534
UUACAU	UA-rich_d2	0.520301	0.467164	0.573438	0.0336837	-0.129699	0.197067	-0.163651	-0.335301	0.00799935	0.0307264	-0.0521384	0.113591	0.0875433	0.0363181	0.138768	-0.0229089	-0.585852	0	-0.0464348	-0.000105557	-0.10207	-0.38927	-0.0743898	0.0125843	0.00314994	-0.25058	0.00792399	-0.027524	0	-0.0325088	-0.16156	-0.00373465	-2.63955	-0.0647531	-0.0431437	-1.4107	-0.00834704	-0.95919	-0.239034	-0.910439	-0.358101	-1.17997	-0.128799	-1.10114	-0.808679	-0.122536	-0.298842	-0.329581
UUACGU	NA	0.382336	0.314918	0.449753	0.0149328	-0.225558	0.255424	-0.0467734	-0.19617	0.102624	0.0204876	-0.0958639	0.136839	0.0795193	0.0253392	0.133699	0.0118328	0.0100695	-0.0159816	-0.0666006	-0.00129144	0.0340953	0.111561	-0.0808804	0.083474	-0.119605	0.0188639	-0.010427	0.0261346	0.0428303	-0.0189993	-0.973903	-0.0298688	-0.173951	-0.0950048	-0.277368	-0.0246114	0.0359616	-0.0580482	-0.13215	-0.0631275	-0.299801	-0.113403	-0.0514144	-0.0954626	-0.135881	-0.037399	-0.0408323	-0.223751
UUAGAU	UA-rich_d2	0.366448	0.306301	0.426596	-0.0336425	-0.186876	0.119591	-0.205729	-0.307637	-0.103821	0.0208993	-0.0841156	0.125914	0.0823888	0.0331518	0.131626	0.031408	0.0136263	0.0352006	0.0268817	-0.110075	-0.00746296	-0.589094	0.0798694	-0.79542	-0.5927	-0.310642	-0.00173059	-0.0126113	-0.112202	-0.477649	-0.448058	-0.0433152	-0.540493	-0.665951	-0.0729108	-0.115629	-0.165421	-0.586978	-0.366896	-0.0653516	-0.0157174	-0.496258	-0.0130216	-1.20337	-0.198928	-0.698862	-0.319336	-0.361367
UUAUAA	UA-rich_d2	0.397371	0.354244	0.440497	0.834761	0.751491	0.91803	-0.600934	-0.777319	-0.424548	-0.255483	-0.324735	-0.186231	-0.0497462	-0.101252	0.00175916	0.0373166	-0.345507	0.0673952	-0.48745	-0.0740242	-0.450556	-0.819614	-0.286728	0.198828	-0.879207	0.139156	-0.0861161	-0.0464636	-0.120273	-0.0778343	-0.162794	-0.000379508	-0.319654	-0.345273	-0.75755	-0.606815	-0.313225	-0.264507	-0.341265	-0.244415	-0.651765	-0.284798	-1.38243	-0.0809808	-1.55319	-2.07207	-1.52966	-0.495277
UUAUAU	UA-rich_d1	0.656065	0.618687	0.693443	0.0541237	-0.0637881	0.172035	-0.145276	-0.215587	-0.0749648	-0.100072	-0.173896	-0.0262486	0.0100392	-0.0358422	0.0559206	-0.19769	-0.0921164	-0.0154545	-0.0430162	-0.245518	-0.0478691	-0.457155	-0.532375	-0.0326473	0	0.0801259	-0.139863	-1.65372	-2.46378	0.0535891	-3.42549	-0.674851	-1.26369	-0.920968	-1.57825	-1.80765	0	-0.733447	-1.83465	-3.26396	-0.363313	-0.150444	-1.42256	-2.00966	-0.228768	-1.88413	-0.589692	-2.30061
UUAUGU	UA-rich_d2	0.546703	0.492268	0.601138	0.0677377	-0.0760474	0.211523	-0.0658177	-0.159076	0.0274402	0.0491237	-0.110289	0.208536	0.036251	-0.024116	0.0966179	0.0111825	0	0.066223	-0.100719	0.0148772	0.0408571	0.0239028	0.0819393	-0.0466395	-0.030095	0.0184709	-0.0010889	0.138849	-0.205954	0.0517969	-0.357749	-0.546273	-0.148312	-0.00548583	-0.266835	-0.162556	-0.303246	-0.246195	-0.259127	-0.312169	-0.900126	-0.34209	-0.490522	-0.0171048	-0.785403	-0.0676723	-0.416007	-0.45068
UUCCCU	NA	-0.0382628	-0.06827	-0.00825564	-0.212322	-0.403588	-0.0210564	0.345274	0.224126	0.466423	0.513635	0.375507	0.651762	0.285559	0.234238	0.33688	0.00390283	-0.0764095	0.0454277	-0.0670644	-0.0680321	-0.0156634	0.0416629	0.00353941	-0.0420809	0.0569922	0.0561659	-0.00306607	-0.00901118	0.0300539	-0.0314824	-0.120948	-0.173347	0.0340991	-0.029244	0	-0.184323	0	-0.115139	0	-0.00867721	0	-0.196202	-0.247227	-0.170252	-0.0666648	-0.250186	0	-0.102588
UUCUCC	NA	-0.0636847	-0.0881332	-0.0392362	-0.157422	-0.536477	0.221634	0.362188	0.236482	0.487894	0.497779	0.378282	0.617275	0.337593	0.26634	0.408846	-0.00341852	0.0115815	-0.0347782	0.0295795	-0.0491458	-0.00409492	-0.0289522	0.0409217	-0.0185715	0.266164	0.0920835	-0.0126002	0.00888313	-0.151692	-0.0187654	0	0.042955	0	0	0.125781	-0.015148	-0.0935494	0.0128359	-0.0910722	-0.2714	-0.185594	0.0201059	-0.0835426	-0.2162	-0.311086	-0.0112603	0.00924299	-0.0881809
UUCUCU	U-rich_d2	-0.0560289	-0.0824602	-0.0295977	-0.391256	-0.604336	-0.178177	0.49208	0.403173	0.580987	0.608132	0.516865	0.699398	0.371665	0.328143	0.415186	0	-0.00223188	0	-0.0918222	-0.0472658	0.0373615	0.00117659	-0.3186	-0.0313044	-0.14529	-0.194882	-0.107387	0.0526861	-0.462267	-0.100303	-0.391319	-0.118108	-0.603068	-0.304505	-0.558475	-0.481123	-0.279972	0	-0.0998584	-0.178125	-0.151163	-0.772791	-0.100808	-0.279795	-0.374969	-0.495144	-0.684291	-1.65496
UUCUUC	U-rich_d2	-0.0746615	-0.0964514	-0.0528715	-0.458811	-0.722581	-0.195041	0.522417	0.4007	0.644133	0.683287	0.606121	0.760452	0.370541	0.331018	0.410065	-0.0290482	0.0885135	0.0471336	0.0202165	0.33218	-0.0981017	-0.102514	0.0687402	0.207112	0.0254419	0.138732	-0.0600087	-0.058813	0.281777	-0.715952	-0.268051	-0.367218	-0.39811	-0.0606972	-0.567407	0	-0.231762	-0.991558	0.0565408	-0.815587	-0.372476	-0.0138036	-0.242838	-0.133387	-0.530024	0.0291915	-0.426282	-0.594734
UUCUUU	U-rich_d1	-0.0465612	-0.0651935	-0.027929	-0.335183	-0.482308	-0.188058	0.538381	0.484659	0.592104	0.690051	0.638236	0.741865	0.414911	0.38688	0.442941	-0.215899	-0.115475	-0.0359422	0.00395934	0.0895859	0.0741164	-0.0654582	-0.31881	0.298311	0.0549084	-0.265935	-0.0140299	-0.544388	-0.111509	-0.857396	-0.584826	-0.638498	-0.0201617	-1.76304	-0.731389	-0.538671	-0.543	-1.03871	-1.02198	-0.344492	-1.17318	-1.21623	-0.755133	-1.06898	-0.890345	-0.411024	-1.62321	-1.31446
UUGUCU	U-rich_d2	0.00302472	-0.0363586	0.042408	-0.261174	-0.464362	-0.0579848	0.437942	0.300369	0.575515	0.608764	0.471336	0.746192	0.326247	0.258233	0.394262	-0.0343452	-0.328867	0	-0.0365125	0.0452927	0	-0.16173	0.0455232	0	-0.0505647	0	0.181693	-0.0640866	-0.793293	-0.0461104	-0.10278	-0.437108	0	-0.110748	-0.0969156	-0.427981	-0.273731	-0.388945	-0.000733551	-0.306832	0	-0.378964	-0.15745	-0.335643	-0.15292	-0.170851	-0.592535	-0.0601347
UUGUUC	U-rich_d2	-0.0404628	-0.0673782	-0.0135473	-0.404408	-0.589257	-0.21956	0.501683	0.40122	0.602146	0.594189	0.500484	0.687894	0.324936	0.270539	0.379333	0	-0.0337748	-0.0105649	0.0525293	0.0144939	0.03236	0.021919	0	-0.0706815	0.381783	0.0254931	0.174886	0.0149463	0.0740194	-0.131076	-0.182936	-0.0606168	-0.441808	-0.202778	-0.0701144	0	-0.033706	-0.186059	-0.0595767	-0.39495	-0.041645	-0.510584	0.0158879	-0.079799	-0.391368	-0.157091	-0.264978	-0.212199
UUUAUA	UA-rich_d1	0.57944	0.547295	0.611585	0.367637	0.250766	0.484508	-0.370791	-0.460513	-0.281069	-0.102095	-0.160783	-0.0434071	0.0167147	-0.0245879	0.0580172	0.0307643	0.0161748	-0.450128	-0.516446	-0.510381	-1.39051	-0.200457	0.0532622	-0.719976	-0.582197	-0.127987	-0.305662	-2.72988	-0.0339601	-2.24342	0.109495	-0.0715693	-0.954538	-2.23609	-0.930653	-1.29112	-4.2672	-1.39201	-0.30774	-1.232	-0.688841	-2.80647	-1.5377	-0.978589	-2.63603	-0.374943	-2.28728	-1.36828
UUUCUC	U-rich_d2	-0.0797875	-0.101561	-0.0580139	-0.363977	-0.54165	-0.186305	0.479307	0.39374	0.564873	0.65643	0.565635	0.747225	0.371412	0.325163	0.417662	0.0138447	-0.0953607	-0.137145	-0.0238967	0.0206087	-0.1151	-0.128054	0.00594572	0.0234252	-0.220122	0.217523	0.0475326	-0.225612	-0.204189	-0.164621	-0.00933161	-0.0728762	-0.0869012	-0.40848	-0.16347	-0.484813	0.0161608	-0.199995	-0.238982	-0.0939171	-1.37559	-0.092745	-0.159359	-0.636765	-0.553776	-0.537809	-1.06796	-0.316968
UUUCUG	U-rich_d2	-0.0164888	-0.0490465	0.016069	-0.556774	-0.849059	-0.264489	0.358506	0.249314	0.467699	0.589825	0.482144	0.697507	0.353454	0.303432	0.403476	0.00706513	-0.00505778	-0.143254	-0.0745154	-0.0490067	-0.00392998	-0.0820431	0.244083	0.00293371	0.111071	-0.0389027	-0.0148988	0.172485	0	0.306609	0.120018	-0.101067	-0.112811	0.00870571	-0.109162	-0.311148	-0.196132	-0.320504	0.144353	-0.0370936	-0.645896	-0.22172	-0.196014	-0.991797	-0.42615	-0.158224	-0.155642	-0.104387
UUUCUU	U-rich_d1	-0.0688947	-0.0847791	-0.0530104	-0.287483	-0.441801	-0.133164	0.571182	0.513435	0.628929	0.668451	0.614916	0.721987	0.430433	0.403404	0.457462	0.0118983	0.00577456	-0.120005	0.0172326	-0.0327508	0.176575	-0.394086	0.0637361	-0.329797	0.0408594	-0.126831	-0.473361	-0.0301168	-1.08213	-0.412687	-0.410076	-0.712485	-0.382125	-0.871602	-0.337158	-0.672707	-0.546765	-1.25469	-0.919941	-1.55252	-0.243799	-0.0782026	-1.3762	-0.988988	-0.367922	-2.99348	-1.35199	-2.25953
UUUGUU	U-rich_d1	-0.0323639	-0.0520276	-0.0127002	-0.339588	-0.459556	-0.219619	0.51867	0.450748	0.586592	0.607625	0.522962	0.692289	0.381117	0.346795	0.415439	-0.0342735	0.138266	0.15701	-0.09624	0.0444618	-0.103887	0.223609	0.101143	0.247105	0.268816	-0.138391	-0.0954189	-0.494664	-0.292013	-0.28123	-0.442812	-0.405659	-0.375292	-0.287367	-0.296194	-0.152251	-1.08362	-0.158629	-0.839637	-0.320887	-1.54225	-0.483823	-0.229808	-0.754951	-0.302059	-0.95598	-0.408782	-0.999837
UUUUCC	U-rich_d2	-0.0735714	-0.0953483	-0.0517946	-0.305133	-0.503745	-0.106522	0.486869	0.385644	0.588094	0.535429	0.456425	0.614432	0.331573	0.292314	0.370833	-0.0284439	-0.0931199	-0.04963	-0.0965835	-0.197529	0.0517419	0.146094	-0.13173	0.0897639	0.0858997	-0.0362959	-0.162204	-0.117842	-0.0250643	-0.0550085	-0.294738	-0.0996999	-0.105019	-0.0984434	-0.20316	-0.481104	-0.667009	-0.607944	-0.383043	-0.631077	-0.270723	-0.538571	-0.528323	-0.65726	-0.269117	-0.627715	-0.0299445	-0.335494
UUUUCG	U-rich_d2	-0.0709739	-0.0974707	-0.0444772	-0.452545	-0.695289	-0.209802	0.367745	0.267671	0.467819	0.556951	0.418929	0.694974	0.368733	0.320768	0.416697	0.0127499	-0.0056994	-0.0223052	0.105203	0.0810037	0.0735962	0.178714	0	-0.00377032	0.0379943	0.0836171	0.0310863	0	0.0135451	-0.21333	0	-0.0994052	0.0131784	-0.308223	-0.143647	-0.153166	-0.436988	-0.0258914	0	-0.182639	-0.483875	-0.340873	-0.156011	-0.0150211	-0.0813965	-0.431263	-0.181552	-0.193696
UUUUCU	U-rich_d1	-0.0585934	-0.0757641	-0.0414227	-0.391962	-0.54149	-0.242434	0.560043	0.501155	0.61893	0.741056	0.681101	0.801011	0.428549	0.401384	0.455715	-0.0594866	-0.0636453	-0.0879106	-0.0411514	-0.0337857	-0.481632	-0.450187	-0.155498	-0.20083	0.0873716	-0.305692	-0.524044	-0.38939	-0.224757	-0.0897882	-0.762322	-0.179612	-0.258993	-0.209676	-1.95798	-0.939275	-0.983371	-0.831108	-0.623383	-0.638898	-0.899658	-2.40556	-0.731478	-0.122591	-1.47782	-2.45151	-1.64687	-1.03808
UUUUGU	U-rich_d1	0.147419	0.115689	0.179148	-0.43619	-0.611998	-0.260382	0.38081	0.314637	0.446984	0.48559	0.402714	0.568466	0.37186	0.334993	0.408728	0.111478	0.128932	0.0960063	0.180276	-0.104392	-0.00433183	0.321822	-0.510417	0.519744	-0.169106	-0.123587	0.0378728	-0.506505	-0.53064	-0.225451	-0.751335	-0.173128	-0.147225	-0.580678	-1.09439	-1.13958	-0.0579894	-0.440688	-1.3401	-1.34609	-1.36724	-0.800512	-0.373298	-0.475345	-0.564466	-0.396067	-0.637667	-1.06047
UUUUUC	U-rich_d1	-0.0938077	-0.109255	-0.0783604	-0.429962	-0.609141	-0.250784	0.559912	0.495487	0.624337	0.645299	0.59723	0.693369	0.396765	0.371791	0.421739	0.00189313	-0.0975705	-0.120037	0.0250913	-0.00177026	-0.443159	-0.0322373	-0.171743	0.286978	-0.317969	-0.0578633	-0.113455	0.114974	0.00656103	-0.415165	-0.081957	-0.0913399	-0.324269	-1.16922	-0.263548	-1.3043	-0.735563	-0.661092	-0.712467	-0.621503	-1.44459	-1.24475	-0.814431	-0.871006	-1.09948	-1.31798	-0.383695	-1.17243
UUUUUG	U-rich_d1	-0.0291686	-0.0500098	-0.00832745	-0.312758	-0.468939	-0.156576	0.447007	0.377619	0.516395	0.581582	0.512285	0.650879	0.346916	0.318177	0.375654	0.0248668	-0.0798055	-0.0788391	-0.0671124	0.138177	0.0682409	-0.512449	0.46944	-0.000148797	0.014266	0.307286	-0.0203318	-0.116454	-0.0747644	-0.332795	-0.0796526	0.00313128	-0.199989	-1.06325	-0.400841	-0.321397	-0.501856	-0.238059	-1.19274	-0.151446	-1.21716	-0.622825	-0.477684	-0.744169	-0.463448	-0.675755	-1.19196	-1.35353
UUUUUU	U-rich_d0	-0.0167101	-0.025307	-0.00811313	-0.177152	-0.279933	-0.0743703	0.532778	0.506019	0.559536	0.510876	0.477694	0.544058	0.412664	0.401021	0.424306	-0.26226	-0.198216	-0.330377	-0.472961	-0.310522	-0.164331	0.146986	-0.337343	-0.465215	0.34773	-0.346649	-0.0927238	-0.0827203	-0.23208	-0.415068	-2.24953	-1.72651	-1.43242	-1.81161	-2.68017	-3.39024	-2.52949	-5.07188	-4.06094	-4.59648	-2.20819	-3.04737	-3.43945	-2.81199	-2.20368	-1.45941	-3.26413	-2.25439
[truncated: 468 more columns]
