# Supplementary material for: Delineating yeast cleavage and polyadenylation signals using deep learning
Source: HighWire-hosted journal article supplement (doi:10.1101/gr.278606.123), 2024-06-24
Supplement: Supplemental_Table_S6.xlsx [file Supplemental_Table_S6.xlsx]

## Sheet: Legend
Table S6. The poly(A) sites identified in S. pombe.
This table contains the locations and summary characteristics for clustered poly(A) sites identified in S.pombe.
Descriptions of the table columns:
Chromosome	Chromosome where the poly(A) site cluster is located.
ClusterStart	The 0-based start coordinate of the poly(A) site cluster.
ClusterEnd	The 0-based end coordinate of the poly(A) site cluster, exclusive.
RepresentativeSite	The 0-based position of the representative site within the cluster, supported by the most 3'READS.
Strand	Strand, either + or -.
Gene	The assigned gene symbol where the cluster is located.
Feature	The location within the gene where the cluster is located (i.e. exon, intron, 3'UTR, etc.).
RelativePosition	If the poly(A) site cluster is located in the 3'UTR or downstream extended region, is the site the first, middle, or last site compared to other poly(A) site clusters.
Supporting 3'READS	The sum of 3'READS within the cluster boundaries.
Usage	For genes with multiple poly(A) sites, the usage level was calculated as the ratio of supporting 3'READS versus the reads supporting the top 2 3'UTR sites in the same gene.

## Sheet: PolyA sites
Chrom	ClusterStart	ClusterEnd	RepresentativeSite	Strand	Gene	Feature	RelativePosition	Supporting3'READS	Usage
I	18944	18962	18951	+	SPAC212.06c	utr3	first	30.5	0.756198
I	18962	18975	18963	+	SPAC212.06c	utr3	last	9.83333	0.243802
I	53425	53430	53428	+	SPAC977.10	coding_exon	CDS	43	0.75
I	53630	53637	53635	+	SPAC977.10	utr3	first	14.5	0.252907
I	53743	53765	53755	+	SPAC977.10	utr3	middle	7.33333	0.127907
I	53832	53863	53852	+	SPAC977.10	utr3	last	42.8333	0.747093
I	57756	57779	57767	+	SPAC977.12	utr3_extended	first	253.767	0.924413
I	57779	57800	57791	+	SPAC977.12	utr3_extended	last	20.75	0.0755874
I	63825	63832	63825	+	SPAC977.15	utr3	single	6.91667	1
I	96959	96976	96965	+	SPAC1F8.05	utr3	single	130.5	1
I	104513	104526	104520	+	SPAC1F8.08	utr3	first	7.66667	0.143302
I	104937	104959	104958	+	SPAC1F8.08	utr3_extended	middle	5.33333	0.0996885
I	104959	104993	104974	+	SPAC1F8.08	utr3_extended	last	45.8333	0.856698
I	107566	107573	107566	+	SPAC11D3.19	utr3	first	48.8333	0.796196
I	108090	108103	108092	+	SPAC11D3.19	utr3	last	12.5	0.203804
I	114510	114527	114525	+	SPAC11D3.05	coding_exon	CDS	41.5	NA
I	114620	114640	114629	+	SPAC11D3.05	coding_exon	CDS	12.5	NA
I	115780	115790	115780	+	SPAC11D3.05	utr3	single	8	1
I	118185	118189	118187	+	SPAC11D3.06	utr3	single	7.5	1
I	126927	126933	126930	+	SPAC11D3.10	utr3	first	6	0.240803
I	127844	127860	127847	+	SPAC11D3.10	utr3	last	18.9167	0.759197
I	130813	130826	130820	+	SPAC11D3.13	coding_exon	CDS	7.16667	NA
I	131052	131068	131055	+	SPAC11D3.13	utr3	single	15.5	1
I	140314	140344	140324	+	SPAC11D3.15	utr3	first	70.8333	0.54768
I	140344	140365	140363	+	SPAC11D3.15	utr3	last	58.5	0.45232
I	142132	142145	142134	+	SPAC11D3.17	utr5	utr5	16.5	1.11236
I	142145	142166	142145	+	SPAC11D3.17	utr5	utr5	5.5	0.370787
I	144452	144463	144452	+	SPAC11D3.17	utr3	first	7.5	0.505618
I	144759	144776	144769	+	SPAC11D3.17	utr3_extended	last	7.33333	0.494382
I	152812	152830	152816	+	SPAC5H10.03	utr3	first	258.75	0.668173
I	152830	152850	152844	+	SPAC5H10.03	utr3	middle	86.3333	0.22294
I	152885	152911	152891	+	SPAC5H10.03	utr3	last	128.5	0.331827
I	164249	164269	164257	+	SPAC5H10.10	utr3	first	352.667	0.927257
I	164269	164288	164275	+	SPAC5H10.10	utr3	middle	8.5	0.0223488
I	164368	164380	164370	+	SPAC5H10.10	utr3	middle	18	0.0473269
I	164565	164582	164569	+	SPAC5H10.10	utr3	middle	27.6667	0.0727432
I	164597	164635	164617	+	SPAC5H10.10	utr3	last	14.7667	0.0388256
I	179905	179915	179905	+	SPAC13G6.03	utr3	first	34.6667	0.370766
I	179968	179980	179968	+	SPAC13G6.03	utr3	last	58.8333	0.629234
I	180968	180986	180968	+	SPAC13G6.04	utr3	first	30	0.772532
I	181475	181489	181481	+	SPAC13G6.04	utr3_extended	last	8.83333	0.227468
I	191368	191385	191375	+	SPAC13G6.09	utr3	first	303.5	0.957413
I	191552	191565	191554	+	SPAC13G6.09	utr3	middle	9.66667	0.0304942
I	191658	191671	191662	+	SPAC13G6.09	utr3	last	13.5	0.0425868
I	201269	201291	201280	+	SPAC13G6.14	utr3	single	8.58333	1
I	206143	206146	206143	+	SPAC24B11.05	utr3_extended	first	11.6667	0.466667
I	206211	206228	206211	+	SPAC24B11.05	utr3_extended	last	13.3333	0.533333
I	214473	214488	214482	+	SPAC24B11.09	utr5	utr5	21.1667	NA
I	215550	215557	215550	+	SPAC24B11.09	utr5	utr5	22	NA
I	215600	215604	215601	+	SPAC24B11.09	utr5	utr5	6.33333	NA
I	230980	230997	230995	+	SPAC24B11.14	coding_exon	CDS	7	NA
I	233029	233051	233045	+	SPAC24B11.13	utr3	first	464	0.929084
I	233077	233090	233083	+	SPAC24B11.13	utr3	middle	35.4167	0.0709161
I	233208	233214	233209	+	SPAC24B11.13	utr3	last	12.6	0.0252294
I	245431	245447	245440	+	SPAC806.05	utr3	first	59	0.670455
I	245688	245700	245688	+	SPAC806.05	utr3	middle	8.5	0.0965909
I	245728	245751	245732	+	SPAC806.05	utr3	middle	29	0.329545
I	245968	245976	245972	+	SPAC806.05	utr3	last	10.5	0.119318
I	248537	248546	248537	+	SPAC806.07	utr3	first	5.5	0.284483
I	248640	248651	248642	+	SPAC806.07	utr3_extended	last	13.8333	0.715517
I	270937	270953	270939	+	SPAC1F5.11c	utr3	single	11	1
I	276235	276248	276235	+	SPAC1F5.08c	coding_exon	CDS	9.5	NA
I	276261	276271	276261	+	SPAC1F5.08c	coding_exon	CDS	15.5	NA
I	278567	278573	278569	+	SPAC1F5.07c	utr3	single	26.25	1
I	282744	282755	282744	+	SPAC1F5.05c	utr3	single	21	1
I	284422	284434	284433	+	SPAC1F5.04c	coding_exon	CDS	5.5	NA
I	289197	289205	289198	+	SPAC1F5.04c	utr3	single	31.5	1
I	289964	289984	289964	+	SPAC1F5.03c	coding_exon	CDS	28.8333	0.0516881
I	291530	291537	291530	+	SPAC1F5.03c	utr3	first	12.5	0.0224081
I	291582	291600	291585	+	SPAC1F5.03c	utr3	middle	497	0.890947
I	291691	291700	291698	+	SPAC1F5.03c	utr3	middle	34	0.0609501
I	291773	291790	291778	+	SPAC1F5.03c	utr3	middle	42.6667	0.0764864
I	291802	291815	291804	+	SPAC1F5.03c	utr3	middle	60.8333	0.109053
I	291815	291834	291825	+	SPAC1F5.03c	utr3	last	20	0.035853
I	304140	304150	304140	+	SPAC18B11.09c	utr3	single	37.25	1
I	305015	305030	305019	+	SPAC18B11.08c	coding_exon	CDS	5.58333	0.0104917
I	305054	305078	305067	+	SPAC18B11.08c	utr3	first	83	0.155966
I	305078	305089	305081	+	SPAC18B11.08c	utr3	middle	48.3333	0.0908237
I	305114	305146	305125	+	SPAC18B11.08c	utr3	last	449.167	0.844034
I	306749	306771	306760	+	SPAC18B11.07c	utr3	single	393.833	1
I	315263	315265	315263	+	SPAC18B11.02c	utr3	first	21	0.213378
I	315277	315300	315295	+	SPAC18B11.02c	utr3	last	77.4167	0.786622
I	321720	321734	321725	+	SPAC12G12.14c	utr3	single	5.91667	1
I	323998	324019	324003	+	SPAC12G12.13c	utr3	first	30.3	0.56848
I	324019	324048	324035	+	SPAC12G12.13c	utr3	middle	10.4667	0.196373
I	324078	324085	324081	+	SPAC12G12.13c	utr3	last	23	0.43152
I	328118	328135	328118	+	SPAC12G12.11c	utr3	single	20	1
I	333536	333554	333542	+	SPAC12G12.17	utr3	first	76.6667	0.598958
I	333554	333585	333559	+	SPAC12G12.17	utr3	middle	51.3333	0.401042
I	334003	334013	334008	+	SPAC12G12.17	utr3_extended	last	6.5	0.0507812
I	336129	336144	336129	+	SPAC12G12.07c	utr3	single	57	1
I	337921	337952	337932	+	SPAC12G12.06c	utr3	single	7859.86	1
I	338897	338901	338897	+	SPAC12G12.05c	utr3	first	5.5	0.0368715
I	339018	339033	339018	+	SPAC12G12.05c	utr3	middle	10.8333	0.0726257
I	339072	339092	339079	+	SPAC12G12.05c	utr3	middle	136.167	0.912849
I	339228	339239	339237	+	SPAC12G12.05c	utr3	last	13	0.0871508
I	347769	347772	347769	+	SPAC12G12.01c	coding_exon	CDS	12.3333	0.23871
I	348216	348226	348216	+	SPAC12G12.01c	coding_exon	CDS	5.08333	0.0983871
I	349956	349966	349957	+	SPAC12G12.01c	utr3	first	6.5	0.125806
I	349966	349981	349975	+	SPAC12G12.01c	utr3	last	45.1667	0.874194
I	352079	352095	352085	+	SPAC630.03	utr3	first	62	0.501348
I	352202	352227	352219	+	SPAC630.03	utr3	middle	41.4167	0.334906
I	352227	352249	352238	+	SPAC630.03	utr3	last	61.6667	0.498652
I	356499	356523	356511	+	SPAC630.05	utr3	first	45.5	0.553753
I	356523	356537	356524	+	SPAC630.05	utr3	last	36.6667	0.446247
I	365203	365212	365211	+	SPAC630.10	utr5	utr5	7	NA
I	366438	366450	366440	+	SPAC630.10	utr3	single	85.5	1
I	366811	366813	366811	+	SPAC630.11	coding_exon	CDS	6	NA
I	385303	385316	385303	+	SPAC1751.04	utr3	first	5.5	0.0117167
I	385375	385387	385381	+	SPAC1751.04	utr3	middle	11.9167	0.0253861
I	385387	385416	385398	+	SPAC1751.04	utr3	last	457.5	0.974614
I	387781	387805	387791	+	SPAC1751.03	utr3	first	43.3333	0.066838
I	387805	387830	387819	+	SPAC1751.03	utr3	last	605	0.933162
I	388297	388309	388297	+	SPAC31A2.02	utr5	utr5	5.5	0.0865687
I	388339	388350	388339	+	SPAC31A2.02	utr5	utr5	5.9	0.0928646
I	389119	389128	389119	+	SPAC31A2.02	utr3	first	35.5	0.558762
I	389150	389183	389168	+	SPAC31A2.02	utr3	middle	28.0333	0.441238
I	389201	389234	389215	+	SPAC31A2.02	utr3	last	14.5	0.228227
I	390266	390285	390266	+	SPAC31A2.03	utr3	first	7.58333	0.393939
I	390363	390373	390363	+	SPAC31A2.03	utr3	middle	7.08333	0.367965
I	390395	390408	390403	+	SPAC31A2.03	utr3	middle	6.45238	0.335189
I	390605	390626	390620	+	SPAC31A2.03	utr3_extended	last	11.6667	0.606061
I	398453	398463	398459	+	SPAC31A2.06	coding_exon	CDS	7	NA
I	403798	403817	403806	+	SPAC31A2.08	utr3	single	507.917	1
I	407548	407564	407548	+	SPAC31A2.10	utr3	single	24.8333	1
I	412003	412023	412010	+	SPAC31A2.12	utr5	utr5	34.4167	NA
I	412023	412046	412035	+	SPAC31A2.12	utr5	utr5	13.1667	NA
I	414250	414258	414250	+	SPAC31A2.12	utr3	single	21.5	1
I	427354	427373	427358	+	SPAC13C5.02	utr3	single	417.917	1
I	430965	430981	430965	+	SPAC13C5.04	utr3	first	5.75	0.235495
I	431001	431016	431006	+	SPAC13C5.04	utr3	last	18.6667	0.764505
I	438517	438535	438524	+	SPAC13C5.07	utr3	first	20.25	0.31848
I	438535	438549	438546	+	SPAC13C5.07	utr3	middle	5.08333	0.0799476
I	438561	438570	438561	+	SPAC13C5.07	utr3	middle	9.66667	0.152031
I	439149	439156	439149	+	SPAC13C5.07	utr3	middle	7.16667	0.112713
I	439193	439219	439200	+	SPAC13C5.07	utr3	middle	43.3333	0.68152
I	439772	439783	439775	+	SPAC13C5.07	utr3	last	16.3333	0.256881
I	445404	445407	445406	+	SPAC23E2.01	utr3	first	5	0.214286
I	445552	445570	445562	+	SPAC23E2.01	utr3	last	18.3333	0.785714
I	450627	450647	450634	+	SPAC23E2.02	utr3	first	23.3333	0.282828
I	450647	450670	450659	+	SPAC23E2.02	utr3	middle	56.8333	0.688889
I	450670	450696	450670	+	SPAC23E2.02	utr3	middle	8.93333	0.108283
I	450696	450725	450711	+	SPAC23E2.02	utr3	last	25.6667	0.311111
I	462779	462789	462782	+	SPAC24H6.12c	coding_exon	CDS	6.33333	NA
I	468376	468384	468376	+	SPAC24H6.11c	utr3	single	11.8	1
I	469879	469892	469883	+	SPAC24H6.10c	utr3	first	371.25	0.971223
I	469903	469906	469903	+	SPAC24H6.10c	utr3_extended	last	11	0.028777
I	492009	492021	492018	+	SPAC24H6.01c	utr3	single	12.3333	1
I	493912	493920	493918	+	SPAPB21F2.02	coding_exon	CDS	8.5	NA
I	496814	496832	496816	+	SPAPB21F2.02	coding_exon	CDS	365.5	NA
I	498801	498806	498803	+	SPAPB21F2.03	utr3	first	5	0.0512946
I	498851	498880	498869	+	SPAPB21F2.03	utr3	middle	75.1429	0.770884
I	498880	498894	498884	+	SPAPB21F2.03	utr3	last	22.3333	0.229116
I	505655	505676	505664	+	SPAC227.04	utr3	first	79.3	0.879808
I	505701	505711	505701	+	SPAC227.04	utr3	last	10.8333	0.120192
I	507514	507537	507527	+	SPAC227.06	utr3	first	57.2	0.844904
I	507556	507570	507564	+	SPAC227.06	utr3	last	10.5	0.155096
I	513321	513335	513332	+	SPAC227.09	utr3	first	26.75	0.507109
I	513373	513388	513376	+	SPAC227.09	utr3	last	26	0.492891
I	514360	514363	514360	+	SPAC227.10	utr3	first	30.3333	0.0872692
I	514400	514411	514405	+	SPAC227.10	utr3	middle	14.3333	0.0412371
I	514476	514490	514477	+	SPAC227.10	utr3	middle	26.5	0.0762407
I	514490	514521	514502	+	SPAC227.10	utr3	middle	306.75	0.882522
I	514534	514555	514552	+	SPAC227.10	utr3	middle	5.16667	0.0148645
I	514762	514790	514775	+	SPAC227.10	utr3	middle	40.8333	0.117478
I	514934	514948	514935	+	SPAC227.10	utr3_extended	middle	17.5	0.0503476
I	515086	515107	515088	+	SPAC227.10	utr3_extended	last	5.66667	0.016303
I	517306	517311	517309	+	SPAC227.12	utr3	first	5	0.166667
I	517353	517365	517353	+	SPAC227.12	utr3	last	25	0.833333
I	526140	526147	526145	+	SPAC227.15	utr3	first	8.33333	0.326797
I	526179	526194	526188	+	SPAC227.15	utr3	middle	10	0.392157
I	526404	526421	526414	+	SPAC227.15	utr3_extended	last	15.5	0.607843
I	531646	531681	531664	+	SPAC227.18	utr3	first	82.5	0.0584968
I	531696	531710	531707	+	SPAC227.18	utr3	middle	413.5	0.293193
I	531710	531734	531720	+	SPAC227.18	utr3	middle	996.833	0.706807
I	531734	531767	531748	+	SPAC227.18	utr3	middle	383	0.271567
I	531856	531885	531870	+	SPAC227.18	utr3	middle	161	0.114157
I	531933	531962	531944	+	SPAC227.18	utr3	last	266.75	0.18914
I	539919	539932	539921	+	SPAC2F7.04	utr3	first	32.8333	0.836873
I	539951	539971	539959	+	SPAC2F7.04	utr3	last	6.4	0.163127
I	552764	552770	552766	+	SPAC2F7.10	coding_exon	CDS	13	NA
I	553319	553334	553323	+	SPAC2F7.10	utr3	single	29	1
I	555947	555951	555947	+	SPAC2F7.11	utr5	utr5	8	NA
I	559041	559048	559046	+	SPAC2F7.11	utr3	single	17.5	1
I	565053	565069	565058	+	SPAC2F7.15	utr3	single	17.9333	1
I	571853	571876	571863	+	SPAC2F7.17	utr3	single	146.417	1
I	579344	579360	579349	+	SPAC13A11.03	utr3	single	12.6667	1
I	584107	584125	584116	+	SPAC13A11.05	utr3	first	7.33333	0.043095
I	584264	584284	584279	+	SPAC13A11.05	utr3	middle	149.167	0.876592
I	584364	584383	584370	+	SPAC13A11.05	utr3	last	21	0.123408
I	587701	587708	587701	+	SPAC13A11.06	utr3_extended	single	5.66667	1
I	590460	590468	590460	+	SPAC3H8.02	utr3	first	6.5	0.15415
I	590650	590664	590655	+	SPAC3H8.02	utr3	middle	27.6667	0.656126
I	590664	590678	590672	+	SPAC3H8.02	utr3	last	14.5	0.343874
I	591771	591781	591774	+	SPAC3H8.03	utr3	first	174	0.936743
I	591868	591877	591868	+	SPAC3H8.03	utr3	middle	11.75	0.0632571
I	591966	591968	591966	+	SPAC3H8.03	utr3	last	6.5	0.0349933
I	593841	593850	593842	+	SPAC3H8.04	utr3	first	23.1667	0.294866
I	593877	593903	593886	+	SPAC3H8.04	utr3	last	55.4	0.705134
I	600504	600523	600512	+	SPAC3H8.06	utr3	single	53.6667	1
I	610211	610221	610212	+	SPAC3H8.10	utr3	first	17	0.167488
I	610440	610452	610440	+	SPAC3H8.10	utr3	middle	8.16667	0.0804598
I	610487	610502	610487	+	SPAC3H8.10	utr3	middle	12.5238	0.123387
I	610517	610524	610522	+	SPAC3H8.10	utr3	middle	8.83333	0.0870279
I	610592	610598	610596	+	SPAC3H8.10	utr3	middle	10.5	0.103448
I	610620	610644	610633	+	SPAC3H8.10	utr3	middle	83	0.817734
I	610696	610712	610700	+	SPAC3H8.10	utr3	last	18.5	0.182266
I	611124	611137	611129	+	SPAC1F3.01	coding_exon	CDS	8.5	0.253479
I	613292	613303	613296	+	SPAC1F3.01	utr3	first	7.5	0.223658
I	613303	613325	613314	+	SPAC1F3.01	utr3	last	26.0333	0.776342
I	625282	625305	625287	+	SPAC1F3.05	utr3	first	43.6333	0.754902
I	625305	625335	625323	+	SPAC1F3.05	utr3	middle	14.1667	0.245098
I	625363	625372	625370	+	SPAC1F3.05	utr3	last	5.2	0.0899654
I	636277	636279	636277	+	SPAC1F3.09	coding_exon	CDS	11	NA
I	636540	636552	636541	+	SPAC1F3.09	coding_exon	CDS	23.1667	NA
I	640210	640221	640213	+	SPAC1D4.01	utr3	first	5.83333	0.132576
I	640221	640246	640232	+	SPAC1D4.01	utr3	middle	31.5	0.715909
I	640414	640420	640415	+	SPAC1D4.01	utr3	middle	12.5	0.284091
I	640984	640997	640984	+	SPAC1D4.01	utr3	last	5.16667	0.117424
I	646427	646440	646430	+	SPAC1D4.04	utr3	first	103.667	0.406802
I	646463	646490	646471	+	SPAC1D4.04	utr3	last	151.167	0.593198
I	650945	650950	650945	+	SPAC1D4.08	intron	intron	6.8	0.179736
I	652002	652006	652004	+	SPAC1D4.08	utr3	first	14	0.370044
I	652242	652256	652245	+	SPAC1D4.08	utr3_extended	last	23.8333	0.629956
I	656326	656333	656329	+	SPAC1D4.10	utr3	first	24	0.159468
I	656436	656443	656436	+	SPAC1D4.10	utr3	middle	55.5	0.368771
I	656498	656533	656517	+	SPAC1D4.10	utr3	middle	16	0.106312
I	656546	656557	656546	+	SPAC1D4.10	utr3	middle	17	0.112957
I	656557	656580	656568	+	SPAC1D4.10	utr3	middle	95	0.631229
I	656645	656666	656646	+	SPAC1D4.10	utr3	last	12.5833	0.0836102
I	665350	665353	665351	+	SPAC1D4.12	coding_exon	CDS	149.5	1.84
I	667429	667446	667432	+	SPAC1D4.12	utr3	first	66.75	0.821538
I	667484	667488	667486	+	SPAC1D4.12	utr3	last	14.5	0.178462
I	669438	669452	669438	+	SPAC1D4.13	utr3	first	10.6667	0.179021
I	669452	669470	669454	+	SPAC1D4.13	utr3	middle	9.25	0.155245
I	669582	669589	669582	+	SPAC1D4.13	utr3	middle	9	0.151049
I	669653	669674	669663	+	SPAC1D4.13	utr3	middle	48.9167	0.820979
I	669674	669704	669685	+	SPAC1D4.13	utr3	last	9.57143	0.160639
I	674063	674089	674075	+	SPAC1D4.14	coding_exon	CDS	14.3333	NA
I	674119	674133	674122	+	SPAC1D4.14	coding_exon	CDS	8	NA
I	674533	674543	674536	+	SPAC1D4.14	coding_exon	CDS	13.6667	NA
I	675415	675430	675427	+	SPAC1D4.14	utr3	single	7.5	1
I	681888	681904	681888	+	SPAC22F3.12c	utr3	single	9.66667	1
I	683469	683473	683469	+	SPAC22F3.11c	utr3	first	6	0.127796
I	683588	683609	683588	+	SPAC22F3.11c	utr3	middle	8.66667	0.184594
I	683635	683660	683639	+	SPAC22F3.11c	utr3	middle	14.95	0.318424
I	683685	683692	683685	+	SPAC22F3.11c	utr3_extended	middle	32	0.681576
I	683712	683728	683712	+	SPAC22F3.11c	utr3_extended	last	8.33333	0.177494
I	686302	686327	686315	+	SPAC22F3.10c	utr3	first	310.5	0.446281
I	686338	686352	686343	+	SPAC22F3.10c	utr3	last	385.25	0.553719
I	692103	692142	692122	+	SPAC22F3.07c	utr3_extended	first	217.333	0.958119
I	692142	692171	692162	+	SPAC22F3.07c	utr3_extended	last	9.5	0.041881
I	694406	694422	694411	+	SPAC22F3.06c	coding_exon	CDS	11	NA
I	697110	697137	697126	+	SPAC22F3.06c	utr3	single	101.2	1
I	697962	697981	697979	+	SPAC22F3.05c	coding_exon	CDS	6.5	0.345133
I	701397	701417	701398	+	SPAC22F3.05c	utr3	first	9.83333	0.522124
I	701751	701753	701751	+	SPAC22F3.05c	utr3	middle	9	0.477876
I	701788	701799	701792	+	SPAC22F3.05c	utr3	last	5.5	0.292035
I	707332	707348	707334	+	SPAC22F3.03c	utr3	first	31.1667	0.802575
I	707496	707514	707508	+	SPAC22F3.03c	utr3	last	7.66667	0.197425
I	712215	712238	712220	+	SPAC1296.02	utr3	first	38.6667	0.321597
I	712238	712274	712256	+	SPAC1296.02	utr3	last	81.5667	0.678403
I	716883	716895	716887	+	SPAC1296.04	utr3	first	49.5833	0.868613
I	716906	716916	716906	+	SPAC1296.04	utr3	last	7.5	0.131387
I	721436	721449	721436	+	SPAC1296.06	utr3	first	26.75	0.835938
I	721449	721465	721451	+	SPAC1296.06	utr3	last	5.25	0.164062
I	725765	725767	725765	+	SPAPJ696.02	utr3	first	8.5	0.159875
I	725932	725946	725943	+	SPAPJ696.02	utr3	last	44.6667	0.840125
I	731759	731766	731763	+	SPAC22G7.02	utr3	first	10.8333	0.37037
I	731815	731824	731815	+	SPAC22G7.02	utr3	middle	5	0.17094
I	731839	731851	731843	+	SPAC22G7.02	utr3	last	18.4167	0.62963
I	732706	732725	732709	+	SPAC22G7.03	utr3	single	5.16667	1
I	736553	736575	736560	+	SPAC22G7.04	utr3	single	19.8	1
I	738768	738782	738778	+	SPAC22G7.05	utr3	single	54	1
I	749890	749902	749895	+	SPAC22G7.08	utr5	utr5	5.75	NA
I	751828	751848	751834	+	SPAC22G7.08	utr3	single	6.25	1
I	754963	754984	754968	+	SPAC22G7.10	utr3	first	39	0.197769
I	755527	755542	755531	+	SPAC22G7.10	utr3	middle	149.7	0.759128
I	755542	755564	755542	+	SPAC22G7.10	utr3	middle	20.8667	0.105815
I	755564	755596	755575	+	SPAC22G7.10	utr3	middle	24.1167	0.122295
I	755670	755684	755679	+	SPAC22G7.10	utr3_extended	last	47.5	0.240872
I	770184	770190	770188	+	SPAC4G8.04	utr3	first	13	0.270833
I	770233	770244	770242	+	SPAC4G8.04	utr3	last	35	0.729167
I	772592	772618	772598	+	SPAC4G8.05	utr3	first	17	0.22707
I	772618	772648	772638	+	SPAC4G8.05	utr3	last	57.8667	0.77293
I	778360	778363	778360	+	SPAC4G8.08	utr3	first	5	0.483871
I	778457	778472	778457	+	SPAC4G8.08	utr3	last	5.33333	0.516129
I	780706	780723	780710	+	SPAC4G8.09	coding_exon	CDS	29.6667	NA
I	782269	782272	782269	+	SPAC4G8.10	utr3	first	7	0.184211
I	782753	782755	782753	+	SPAC4G8.10	utr3	last	31	0.815789
I	796694	796728	796713	+	SPAC16C9.03	utr3	single	170.5	1
I	801032	801069	801051	+	SPAC16C9.05	utr3_extended	single	32.75	1
I	805841	805866	805846	+	SPAC16C9.07	coding_exon	CDS	10.75	NA
I	807687	807715	807695	+	SPAC16C9.07	utr3	single	69.6167	1
I	808562	808564	808562	+	SPAC2G11.02	coding_exon	CDS	6	NA
I	810337	810353	810339	+	SPAC2G11.02	coding_exon	CDS	6.5	NA
I	812184	812192	812184	+	SPAC2G11.02	utr3	single	13	1
I	815371	815382	815371	+	SPAC2G11.04	utr3	first	28.8333	0.44473
I	815382	815393	815383	+	SPAC2G11.04	utr3	last	36	0.55527
I	818546	818550	818546	+	SPAC2G11.06	coding_exon	CDS	5.5	NA
I	818908	818914	818910	+	SPAC2G11.06	coding_exon	CDS	14	NA
I	819673	819690	819677	+	SPAC2G11.06	utr3	single	186.167	1
I	824896	824898	824896	+	SPAC2G11.09	coding_exon	CDS	8.5	0.109677
I	825843	825845	825843	+	SPAC2G11.09	coding_exon	CDS	5	0.0645161
I	826321	826332	826325	+	SPAC2G11.09	utr3	first	7	0.0903226
I	826385	826398	826388	+	SPAC2G11.09	utr3	last	70.5	0.909677
I	836024	836035	836029	+	SPAC2G11.12	utr3	first	78.8333	0.385808
I	836035	836065	836045	+	SPAC2G11.12	utr3	last	125.5	0.614192
I	838022	838037	838024	+	SPAC2G11.13	utr3	first	9.5	0.275362
I	838121	838128	838121	+	SPAC2G11.13	utr3	middle	9.33333	0.270531
I	838154	838177	838159	+	SPAC2G11.13	utr3	last	25	0.724638
I	839551	839553	839551	+	SPAC2G11.14	coding_exon	CDS	8.5	NA
I	841521	841532	841526	+	SPAC2G11.14	utr3	single	21.25	1
I	844041	844046	844044	+	SPAC521.02	coding_exon	CDS	11.8333	NA
I	845990	846001	845990	+	SPAC521.03	utr3	first	14.1667	0.117241
I	846001	846028	846005	+	SPAC521.03	utr3	middle	10.8333	0.0896552
I	846028	846054	846043	+	SPAC521.03	utr3	middle	106.667	0.882759
I	846054	846065	846058	+	SPAC521.03	utr3	middle	8.83333	0.0731034
I	846141	846158	846153	+	SPAC521.03	utr3_extended	last	9.46667	0.0783448
I	850147	850170	850157	+	SPAC521.05	utr3	first	2456.2	0.278996
I	850170	850197	850182	+	SPAC521.05	utr3	last	6347.5	0.721004
I	854306	854336	854323	+	SPAC23G3.01	coding_exon	CDS	10.5	0.346154
I	854373	854400	854385	+	SPAC23G3.01	utr3_extended	first	25.3333	0.835165
I	854465	854469	854467	+	SPAC23G3.01	utr3_extended	last	5	0.164835
I	871540	871554	871545	+	SPAC23G3.03	coding_exon	CDS	34.5	1.104
I	872005	872019	872007	+	SPAC23G3.03	coding_exon	CDS	12.4	0.3968
I	872596	872620	872609	+	SPAC23G3.03	utr3	first	16.25	0.52
I	872663	872682	872668	+	SPAC23G3.03	utr3	last	15	0.48
I	873994	874000	873994	+	SPAC23G3.04	utr3	single	6.66667	1
I	878744	878760	878749	+	SPAC23G3.06	utr3	first	18.25	0.0133639
I	878760	878782	878770	+	SPAC23G3.06	utr3	middle	134	0.0981243
I	878782	878798	878787	+	SPAC23G3.06	utr3	middle	26	0.0190391
I	878809	878839	878835	+	SPAC23G3.06	utr3	middle	191.714	0.140387
I	878839	878864	878853	+	SPAC23G3.06	utr3	middle	1173.9	0.859613
I	878864	878886	878885	+	SPAC23G3.06	utr3	middle	32.3667	0.0237012
I	878886	878908	878896	+	SPAC23G3.06	utr3	middle	110.7	0.0810624
I	878908	878925	878919	+	SPAC23G3.06	utr3	last	11.8333	0.00866521
I	885718	885731	885722	+	SPAC23G3.09	utr3	first	196.917	0.724847
I	885742	885762	885745	+	SPAC23G3.09	utr3	middle	74.75	0.275153
I	885774	885792	885788	+	SPAC23G3.09	utr3	middle	32	0.117791
I	885843	885855	885852	+	SPAC23G3.09	utr3	last	13.3333	0.0490798
I	889076	889088	889082	+	SPAC23G3.11	utr3	single	14.5	1
I	894811	894817	894811	+	SPAC22H12.02	utr5	utr5	9	NA
I	896526	896549	896530	+	SPAC22H12.02	utr3	single	72.6667	1
I	903845	903869	903858	+	SPAC1687.01	utr3	first	93.1667	0.810145
I	903869	903887	903869	+	SPAC1687.01	utr3_extended	last	21.8333	0.189855
I	905583	905591	905583	+	SPAC1687.02	utr3	first	14.5	0.299484
I	905613	905625	905616	+	SPAC1687.02	utr3	middle	31.6667	0.654045
I	905907	905926	905909	+	SPAC1687.02	utr3	middle	5	0.10327
I	905962	905984	905970	+	SPAC1687.02	utr3	last	16.75	0.345955
I	908101	908118	908108	+	SPAC1687.04	coding_exon	CDS	16.5	NA
I	908682	908700	908689	+	SPAC1687.04	utr3	single	18.6667	1
I	911090	911125	911105	+	SPAC1687.05	utr3	first	144	0.49696
I	911125	911157	911145	+	SPAC1687.05	utr3	middle	145.762	0.50304
I	911157	911185	911157	+	SPAC1687.05	utr3	last	17.3452	0.0598603
I	914337	914361	914353	+	SPAC1687.08	coding_exon	CDS	23.8333	NA
I	919320	919326	919320	+	SPAC1687.09	utr3	first	18	0.0519981
I	919665	919676	919670	+	SPAC1687.09	utr3	middle	317	0.915744
I	919708	919720	919708	+	SPAC1687.09	utr3	last	29.1667	0.0842561
I	922057	922078	922059	+	SPAC1687.10	utr3	single	35.9167	1
I	925027	925046	925037	+	SPAC1687.11	utr3	first	630	0.872576
I	925070	925084	925073	+	SPAC1687.11	utr3	middle	92	0.127424
I	925158	925173	925168	+	SPAC1687.11	utr3_extended	last	8.83333	0.0122345
I	931861	931890	931878	+	SPAC1687.15	utr3	first	461.583	0.859426
I	931890	931914	931902	+	SPAC1687.15	utr3	last	75.5	0.140574
I	949887	949896	949894	+	SPAC222.19	coding_exon	CDS	8.75	NA
I	954059	954071	954069	+	SPAC222.06	coding_exon	CDS	21.6667	0.0790947
I	954190	954222	954204	+	SPAC222.06	utr3	first	267.933	0.978097
I	954234	954255	954253	+	SPAC222.06	utr3	last	6	0.0219031
I	960312	960327	960319	+	SPAC222.09	coding_exon	CDS	15.7	0.0182328
I	962162	962173	962162	+	SPAC222.09	utr3	first	39.5	0.0458724
I	962202	962214	962208	+	SPAC222.09	utr3	middle	202.583	0.235266
I	962214	962237	962226	+	SPAC222.09	utr3	middle	658.5	0.764734
I	962237	962250	962243	+	SPAC222.09	utr3_extended	last	74.25	0.0862286
I	967588	967598	967590	+	SPAC222.11	utr3	single	212.333	1
I	979454	979479	979461	+	SPAC222.18	utr3	first	271	0.71966
I	979479	979508	979497	+	SPAC222.18	utr3	middle	105.567	0.28034
I	979508	979534	979518	+	SPAC222.18	utr3	last	9.16667	0.0243427
I	989818	989829	989824	+	SPAC821.05	utr3	first	39	0.342105
I	989865	989876	989871	+	SPAC821.05	utr3_extended	middle	33.9	0.297368
I	989890	989904	989893	+	SPAC821.05	utr3_extended	middle	75	0.657895
I	990059	990068	990059	+	SPAC821.05	utr3_extended	last	9.5	0.0833333
I	991557	991580	991567	+	SPAC821.06	utr3	first	36.25	0.81187
I	991730	991751	991741	+	SPAC821.06	utr3	last	8.4	0.18813
I	1000254	1000272	1000259	+	SPAC821.09	coding_exon	CDS	57.8333	1.00755
I	1002213	1002215	1002213	+	SPAC821.09	utr3	first	6	0.10453
I	1002325	1002345	1002332	+	SPAC821.09	utr3	last	51.4	0.89547
I	1007864	1007886	1007873	+	SPAC821.11	utr3	first	52.8333	0.526578
I	1007886	1007909	1007898	+	SPAC821.11	utr3	middle	11	0.109635
I	1007938	1007953	1007945	+	SPAC821.11	utr3	middle	47.5	0.473422
I	1007973	1007987	1007981	+	SPAC821.11	utr3	middle	6	0.0598007
I	1008015	1008034	1008022	+	SPAC821.11	utr3_extended	last	36.5	0.363787
I	1010304	1010310	1010307	+	SPAC821.12	utr3	single	10.6667	1
I	1024027	1024047	1024035	+	SPAC139.03	utr3	single	12	1
I	1031934	1031947	1031939	+	SPAC139.06	utr3	single	6	1
I	1034935	1034942	1034938	+	SPAC23C4.03	coding_exon	CDS	9.5	NA
I	1035438	1035456	1035438	+	SPAC23C4.03	coding_exon	CDS	27	NA
I	1035808	1035815	1035811	+	SPAC23C4.03	utr3	single	32.8333	1
I	1040393	1040400	1040393	+	SPAC23C4.07	coding_exon	CDS	5.5	NA
I	1042948	1042973	1042962	+	SPAC23C4.08	utr3	first	193	0.450671
I	1043007	1043012	1043007	+	SPAC23C4.08	utr3	middle	7.83333	0.0182915
I	1043023	1043029	1043025	+	SPAC23C4.08	utr3	middle	10.25	0.0239346
I	1043077	1043089	1043083	+	SPAC23C4.08	utr3_extended	last	235.25	0.549329
I	1046712	1046747	1046727	+	SPAC23C4.10	utr3	single	46.55	1
I	1047686	1047712	1047700	+	SPAC23C4.11	utr3	first	98.2333	0.946979
I	1047739	1047745	1047739	+	SPAC23C4.11	utr3	last	5.5	0.0530206
I	1052715	1052730	1052719	+	SPAC23C4.13	utr3	single	21.6667	1
I	1055852	1055868	1055857	+	SPAC23C4.15	utr3	first	1133.5	0.939339
I	1055868	1055888	1055870	+	SPAC23C4.15	utr3	last	73.2	0.0606613
I	1061099	1061102	1061099	+	SPAC23C4.17	utr3	first	22	0.503817
I	1061123	1061133	1061123	+	SPAC23C4.17	utr3	last	21.6667	0.496183
I	1064052	1064063	1064052	+	SPAC23C4.19	coding_exon	CDS	6.83333	NA
I	1066939	1066953	1066945	+	SPAC23C4.19	utr3	single	8.2	1
I	1069847	1069869	1069858	+	SPAC1A6.02	utr3	first	9.7	0.566699
I	1069893	1069914	1069906	+	SPAC1A6.02	utr3	last	7.41667	0.433301
I	1085011	1085027	1085025	+	SPAC1A6.07	coding_exon	CDS	21	0.0795455
I	1086301	1086312	1086306	+	SPAC1A6.07	utr3	first	6.33333	0.0239899
I	1086312	1086335	1086323	+	SPAC1A6.07	utr3	last	257.667	0.97601
I	1091391	1091403	1091399	+	SPAC1A6.10	coding_exon	CDS	125.417	NA
I	1094254	1094284	1094267	+	SPAC30D11.14c	utr3	single	25.8333	1
I	1106499	1106509	1106506	+	SPAC30D11.08c	coding_exon	CDS	7.16667	0.0546379
I	1106540	1106552	1106546	+	SPAC30D11.08c	utr3	first	25.5	0.194409
I	1106584	1106609	1106597	+	SPAC30D11.08c	utr3	last	105.667	0.805591
I	1109036	1109054	1109046	+	SPAC30D11.06c	intron	intron	5.66667	NA
I	1115850	1115865	1115856	+	SPAC30D11.04c	utr3	single	74.5	1
I	1123531	1123567	1123549	+	SPAC30D11.01c	utr3	first	32.1667	0.831897
I	1123684	1123694	1123684	+	SPAC30D11.01c	utr3	last	6.5	0.168103
I	1129047	1129066	1129054	+	SPAC56F8.02	utr3	single	36.6667	1
I	1132847	1132875	1132860	+	SPAC56F8.03	utr3	first	10.9667	0.0625535
I	1132875	1132900	1132889	+	SPAC56F8.03	utr3	middle	151.067	0.861679
I	1132900	1132922	1132911	+	SPAC56F8.03	utr3	middle	24.25	0.138321
I	1132959	1132977	1132968	+	SPAC56F8.03	utr3	last	8.75	0.0499097
I	1140331	1140346	1140340	+	SPAC56F8.08	utr3_extended	first	12	0.0687679
I	1140378	1140403	1140383	+	SPAC56F8.08	utr3_extended	last	162.5	0.931232
I	1141692	1141702	1141693	+	SPAC56F8.09	utr3	single	5.33333	1
I	1143558	1143564	1143559	+	SPAC56F8.10	coding_exon	CDS	27.5	0.753425
I	1145145	1145147	1145145	+	SPAC56F8.10	utr3	first	5	0.136986
I	1145234	1145245	1145234	+	SPAC56F8.10	utr3	last	31.5	0.863014
I	1145707	1145721	1145714	+	SPAC56F8.11	intron	intron	148.5	3.63673
I	1146558	1146563	1146560	+	SPAC56F8.11	utr3	first	18.3333	0.44898
I	1146591	1146604	1146591	+	SPAC56F8.11	utr3	middle	5.33333	0.130612
I	1146620	1146628	1146620	+	SPAC56F8.11	utr3	middle	6.5	0.159184
I	1146656	1146671	1146665	+	SPAC56F8.11	utr3	last	22.5	0.55102
I	1152616	1152632	1152618	+	SPAC56F8.15	utr3	single	71.5	1
I	1163663	1163680	1163670	+	SPAC22A12.05	utr3_extended	single	671.333	1
I	1176011	1176031	1176016	+	SPAC22A12.10	utr3	first	1694.17	0.951022
I	1176605	1176622	1176614	+	SPAC22A12.10	utr3	last	87.25	0.0489779
I	1178891	1178905	1178891	+	SPAC22A12.11	utr3	single	57.8333	1
I	1181110	1181119	1181110	+	SPAC22A12.13	utr3	single	20.85	1
I	1187902	1187920	1187909	+	SPAC22A12.16	utr3	first	700.633	0.699631
I	1187920	1187934	1187920	+	SPAC22A12.16	utr3	last	300.8	0.300369
I	1192335	1192347	1192346	+	SPAC4C5.01	utr5	utr5	7.5	0.360866
I	1192452	1192454	1192452	+	SPAC4C5.01	utr5	utr5	5.5	0.264635
I	1193702	1193710	1193702	+	SPAC4C5.01	utr3	first	13.25	0.63753
I	1193722	1193731	1193726	+	SPAC4C5.01	utr3	last	7.53333	0.36247
I	1196916	1196942	1196933	+	SPAC4C5.03	utr5	utr5	6.41667	0.031159
I	1196942	1196959	1196951	+	SPAC4C5.03	utr5	utr5	13	0.0631272
I	1198133	1198153	1198139	+	SPAC4C5.03	utr3	first	27.5	0.133538
I	1198189	1198210	1198189	+	SPAC4C5.03	utr3	middle	90.7667	0.440758
I	1198223	1198246	1198225	+	SPAC4C5.03	utr3	middle	115.167	0.559242
I	1198246	1198270	1198266	+	SPAC4C5.03	utr3	last	13.3333	0.0647459
I	1199798	1199809	1199801	+	SPAC4C5.04	utr3_extended	single	5.5	1
I	1214290	1214310	1214300	+	SPAC10F6.04	coding_exon	CDS	6.33333	NA
I	1218029	1218040	1218029	+	SPAC10F6.06	utr3	first	28	0.135135
I	1218040	1218051	1218047	+	SPAC10F6.06	utr3	middle	12	0.0579151
I	1218064	1218092	1218078	+	SPAC10F6.06	utr3	middle	110.7	0.534266
I	1218092	1218117	1218106	+	SPAC10F6.06	utr3	middle	96.5	0.465734
I	1218187	1218211	1218194	+	SPAC10F6.06	utr3	last	6	0.0289575
I	1226987	1226996	1226987	+	SPAC10F6.10	coding_exon	CDS	5.5	NA
I	1227323	1227340	1227331	+	SPAC10F6.10	utr3	single	25.7333	1
I	1240173	1240188	1240183	+	SPAC10F6.16	utr3	first	42.6667	0.780488
I	1240224	1240255	1240248	+	SPAC10F6.16	utr3_extended	middle	11	0.20122
I	1240255	1240270	1240267	+	SPAC10F6.16	utr3_extended	last	12	0.219512
I	1245585	1245587	1245585	+	SPAC56E4.03	utr3	first	49	0.695035
I	1245728	1245746	1245744	+	SPAC56E4.03	utr3	middle	6.75	0.0957447
I	1245746	1245764	1245761	+	SPAC56E4.03	utr3	last	21.5	0.304965
I	1256400	1256422	1256400	+	SPAC56E4.05	utr3	first	16.95	0.755011
I	1256422	1256445	1256443	+	SPAC56E4.05	utr3_extended	last	5.5	0.244989
I	1260250	1260287	1260270	+	SPAC56E4.07	utr3	single	278.567	1
I	1267776	1267780	1267776	+	SPAC1420.03	utr3	single	11.75	1
I	1273837	1273852	1273841	+	SPAPB17E12.03	utr3	first	1714.5	0.952588
I	1273852	1273878	1273852	+	SPAPB17E12.03	utr3	last	85.3333	0.0474118
I	1275889	1275905	1275902	+	SPAPB17E12.05	utr3	first	5182.83	0.464689
I	1275905	1275926	1275915	+	SPAPB17E12.05	utr3	last	5970.5	0.535311
I	1278969	1278971	1278969	+	SPAPB17E12.06	utr3	single	5	1
I	1284435	1284463	1284452	+	SPAPB17E12.11	utr3	first	1797.5	0.838908
I	1284463	1284481	1284468	+	SPAPB17E12.11	utr3	last	345.167	0.161092
I	1286288	1286311	1286303	+	SPAPB17E12.13	utr3	first	2954.53	0.318719
I	1286311	1286334	1286323	+	SPAPB17E12.13	utr3	last	6315.5	0.681281
I	1292077	1292079	1292077	+	SPAC1565.01	utr3	first	7	0.0284746
I	1292128	1292149	1292138	+	SPAC1565.01	utr3	middle	32.3333	0.131525
I	1292149	1292160	1292153	+	SPAC1565.01	utr3	middle	10.9167	0.0444068
I	1292289	1292296	1292293	+	SPAC1565.01	utr3	middle	11.1667	0.0454237
I	1292387	1292400	1292394	+	SPAC1565.01	utr3	middle	202	0.821695
I	1292547	1292566	1292560	+	SPAC1565.01	utr3	middle	18.3333	0.0745763
I	1293344	1293359	1293355	+	SPAC1565.01	utr3	middle	7.75	0.0315254
I	1293375	1293390	1293375	+	SPAC1565.01	utr3	middle	5.66667	0.0230508
I	1293424	1293436	1293425	+	SPAC1565.01	utr3	middle	43.8333	0.178305
I	1293436	1293448	1293439	+	SPAC1565.01	utr3	last	14.6667	0.059661
I	1298077	1298085	1298078	+	SPAC1565.05	coding_exon	CDS	35.5	NA
I	1299781	1299790	1299781	+	SPAC1565.05	utr3	single	7.5	1
I	1308968	1308993	1308981	+	SPAC1565.08	utr3	first	2135.17	0.81031
I	1308993	1309016	1309005	+	SPAC1565.08	utr3	middle	175.167	0.0664769
I	1309059	1309086	1309078	+	SPAC1565.08	utr3	middle	499.833	0.18969
I	1309131	1309152	1309141	+	SPAC1565.08	utr3	last	421.75	0.160057
I	1313029	1313049	1313035	+	SPAC6F12.02	utr3	first	6.91667	0.557047
I	1313062	1313077	1313062	+	SPAC6F12.02	utr3	last	5.5	0.442953
I	1316588	1316625	1316608	+	SPAC6F12.04	utr3	first	55.7	0.0156497
I	1316625	1316652	1316642	+	SPAC6F12.04	utr3	middle	1644.5	0.462046
I	1316674	1316701	1316690	+	SPAC6F12.04	utr3_extended	middle	1914.67	0.537954
I	1316778	1316797	1316794	+	SPAC6F12.04	utr3_extended	last	81	0.0227581
I	1320775	1320781	1320775	+	SPAC6F12.06	utr3	first	9.83333	0.155263
I	1320869	1320876	1320869	+	SPAC6F12.06	utr3	middle	10.75	0.169737
I	1320908	1320942	1320924	+	SPAC6F12.06	utr3	middle	20.5	0.323684
I	1320978	1320993	1320982	+	SPAC6F12.06	utr3	middle	42.8333	0.676316
I	1321046	1321064	1321052	+	SPAC6F12.06	utr3	last	17	0.268421
I	1321657	1321663	1321658	+	SPAC6F12.07	intron	intron	16.5	0.066345
I	1321778	1321794	1321788	+	SPAC6F12.07	coding_exon	CDS	5.5	0.022115
I	1322316	1322346	1322335	+	SPAC6F12.07	utr3	first	178.367	0.717196
I	1322346	1322367	1322354	+	SPAC6F12.07	utr3	last	70.3333	0.282804
I	1325794	1325800	1325797	+	SPAC6F12.09	coding_exon	CDS	18	NA
I	1328439	1328447	1328440	+	SPAC6F12.09	coding_exon	CDS	7.25	NA
I	1336568	1336583	1336568	+	SPAC6F12.12	coding_exon	CDS	6.66667	NA
I	1336915	1336918	1336917	+	SPAC6F12.12	intron	intron	11	NA
I	1338130	1338143	1338130	+	SPAC6F12.12	utr3	single	6.08333	1
I	1342442	1342448	1342442	+	SPAC6F12.14	utr3	single	6.5	1
I	1351113	1351146	1351129	+	SPAC6F12.17	utr3	first	102.417	0.917849
I	1351203	1351214	1351208	+	SPAC6F12.17	utr3	last	9.16667	0.0821509
I	1357179	1357184	1357180	+	SPAC19E9.02	utr3	single	13.75	1
I	1361873	1361875	1361873	+	SPAC19E9.03	utr5	utr5	8	0.0212578
I	1362426	1362442	1362438	+	SPAC19E9.03	utr5	utr5	6.75	0.0179362
I	1363878	1363902	1363887	+	SPAC19E9.03	utr3	first	15.6667	0.0416298
I	1363931	1363942	1363936	+	SPAC19E9.03	utr3	middle	6.5	0.0172719
I	1363994	1364023	1364002	+	SPAC19E9.03	utr3	middle	23.5	0.0624446
I	1364077	1364093	1364088	+	SPAC19E9.03	utr3	middle	37.1667	0.09876
I	1364113	1364123	1364120	+	SPAC19E9.03	utr3	middle	8.83333	0.0234721
I	1364134	1364150	1364138	+	SPAC19E9.03	utr3	last	339.167	0.90124
I	1366506	1366542	1366522	+	SPAC57A10.02	coding_exon	CDS	29.3333	2.17284
I	1367720	1367723	1367720	+	SPAC57A10.02	utr3	first	6	0.444444
I	1367785	1367792	1367790	+	SPAC57A10.02	utr3	last	7.5	0.555556
I	1369567	1369578	1369573	+	SPAC57A10.03	utr3	first	34.5	0.778195
I	1369657	1369664	1369661	+	SPAC57A10.03	utr3_extended	middle	8.33333	0.18797
I	1369681	1369689	1369681	+	SPAC57A10.03	utr3_extended	middle	8.83333	0.199248
I	1369702	1369715	1369702	+	SPAC57A10.03	utr3_extended	middle	9.83333	0.221805
I	1369775	1369791	1369780	+	SPAC57A10.03	utr3_extended	last	9.66667	0.218045
I	1393875	1393878	1393876	+	SPAC20G8.03	utr5	utr5	27	0.190499
I	1395693	1395718	1395707	+	SPAC20G8.03	utr3	first	52.1667	0.368062
I	1395743	1395758	1395755	+	SPAC20G8.03	utr3	middle	26.9	0.189793
I	1395758	1395777	1395770	+	SPAC20G8.03	utr3	middle	89.5667	0.631938
I	1395801	1395823	1395819	+	SPAC20G8.03	utr3	last	9.5	0.0670273
I	1404327	1404340	1404327	+	SPAC20G8.06	coding_exon	CDS	34.5	0.310904
I	1404444	1404453	1404444	+	SPAC20G8.06	coding_exon	CDS	5.33333	0.0480625
I	1405308	1405310	1405308	+	SPAC20G8.06	coding_exon	CDS	9.5	0.0856113
I	1408671	1408673	1408671	+	SPAC20G8.06	coding_exon	CDS	8.5	0.0765996
I	1409750	1409773	1409762	+	SPAC20G8.06	utr3	first	102.667	0.925203
I	1409773	1409789	1409784	+	SPAC20G8.06	utr3_extended	last	8.3	0.0747972
I	1434837	1434856	1434853	+	SPAC3A12.07	utr3_extended	first	5.33333	0.0543755
I	1434856	1434887	1434867	+	SPAC3A12.07	utr3_extended	last	92.75	0.945624
I	1436045	1436064	1436048	+	SPAC3A12.08	utr3	first	20.6667	0.626263
I	1436064	1436085	1436066	+	SPAC3A12.08	utr3	last	12.3333	0.373737
I	1438945	1438965	1438949	+	SPAC3A12.10	utr3	first	491	0.567958
I	1439001	1439015	1439007	+	SPAC3A12.10	utr3	middle	373.5	0.432042
I	1439026	1439031	1439026	+	SPAC3A12.10	utr3_extended	last	13	0.0150376
I	1442034	1442060	1442052	+	SPAC3A12.12	utr3	first	11.75	0.30989
I	1442090	1442101	1442090	+	SPAC3A12.12	utr3	middle	13.0833	0.345055
I	1442101	1442130	1442109	+	SPAC3A12.12	utr3	middle	24.8333	0.654945
I	1442189	1442199	1442196	+	SPAC3A12.12	utr3	middle	5	0.131868
I	1442229	1442237	1442232	+	SPAC3A12.12	utr3	last	12.9	0.34022
I	1446186	1446211	1446192	+	SPAC3A12.14	utr3	first	169.75	0.767232
I	1446290	1446300	1446292	+	SPAC3A12.14	utr3	last	51.5	0.232768
I	1449114	1449125	1449123	+	SPAC3A12.15	utr3	first	9	0.327273
I	1449273	1449295	1449286	+	SPAC3A12.15	utr3_extended	last	18.5	0.672727
I	1456442	1456455	1456453	+	SPAC3A12.18	coding_exon	CDS	5.16667	0.0645833
I	1456455	1456478	1456468	+	SPAC3A12.18	coding_exon	CDS	11.1667	0.139583
I	1456478	1456504	1456487	+	SPAC3A12.18	coding_exon	CDS	14	0.175
I	1456504	1456525	1456520	+	SPAC3A12.18	coding_exon	CDS	11	0.1375
I	1456605	1456620	1456609	+	SPAC3A12.18	utr3	first	52.5	0.65625
I	1456733	1456752	1456740	+	SPAC3A12.18	utr3	middle	18.6667	0.233333
I	1456766	1456791	1456777	+	SPAC3A12.18	utr3	middle	22.5	0.28125
I	1456828	1456834	1456833	+	SPAC3A12.18	utr3	middle	5	0.0625
I	1456866	1456873	1456869	+	SPAC3A12.18	utr3	last	27.5	0.34375
I	1473699	1473718	1473710	+	SPAC9.05	utr3	first	20.5	0.355081
I	1473869	1473875	1473870	+	SPAC9.05	utr3	middle	8.5	0.147229
I	1473908	1473930	1473918	+	SPAC9.05	utr3	middle	37.2333	0.644919
I	1474042	1474063	1474048	+	SPAC9.05	utr3	last	19.5	0.33776
I	1481134	1481158	1481157	+	SPAC9.09	utr3	first	529.1	0.0421344
I	1481158	1481181	1481170	+	SPAC9.09	utr3	middle	12028.3	0.957866
I	1481205	1481232	1481218	+	SPAC9.09	utr3_extended	last	359.333	0.0286152
I	1484703	1484704	1484703	+	SPAC9.10	utr3	first	5	0.357143
I	1484743	1484757	1484755	+	SPAC9.10	utr3_extended	last	9	0.642857
I	1486997	1487027	1487010	+	SPAC9.11	utr3	first	56.1667	0.783721
I	1487027	1487049	1487043	+	SPAC9.11	utr3	middle	5.5	0.0767442
I	1487281	1487299	1487286	+	SPAC9.11	utr3	middle	10.25	0.143023
I	1487527	1487543	1487527	+	SPAC9.11	utr3	middle	5.16667	0.072093
I	1487543	1487565	1487559	+	SPAC9.11	utr3	middle	6.58333	0.0918605
I	1487901	1487910	1487901	+	SPAC9.11	utr3	last	15.5	0.216279
I	1497000	1497002	1497000	+	SPAC5D6.09c	utr5	utr5	5	NA
I	1498525	1498543	1498541	+	SPAC5D6.09c	utr3	single	5	1
I	1498812	1498826	1498819	+	SPAC5D6.08c	utr5	utr5	10	NA
I	1500058	1500063	1500060	+	SPAC5D6.08c	utr3	single	18.3333	1
I	1503744	1503765	1503755	+	SPAC5D6.06c	utr3	single	44.5	1
I	1511395	1511407	1511401	+	SPAC5D6.02c	utr3	single	5.83333	1
I	1523478	1523480	1523478	+	SPAC57A7.10c	coding_exon	CDS	5.5	0.0603953
I	1524592	1524629	1524610	+	SPAC57A7.10c	utr3	first	66.9	0.734627
I	1524700	1524706	1524700	+	SPAC57A7.10c	utr3	middle	6	0.0658858
I	1524772	1524778	1524775	+	SPAC57A7.10c	utr3	middle	5	0.0549048
I	1524826	1524844	1524832	+	SPAC57A7.10c	utr3	last	24.1667	0.265373
I	1545053	1545076	1545064	+	SPAC57A7.04c	utr3	first	808	0.482724
I	1545178	1545209	1545198	+	SPAC57A7.04c	utr3	last	865.833	0.517276
I	1549920	1549941	1549933	+	SPAC167.07c	utr3	single	77.8333	1
I	1550755	1550763	1550761	+	SPAC167.06c	utr3	single	5.5	1
I	1557103	1557118	1557111	+	SPAC167.03c	utr3	first	27.1667	0.472464
I	1557149	1557157	1557155	+	SPAC167.03c	utr3	last	30.3333	0.527536
I	1569441	1569456	1569441	+	SPAC1705.02	utr3	single	8.41667	1
I	1576042	1576049	1576046	+	SPAC23H4.18c	utr3	first	294.5	0.857559
I	1576244	1576253	1576248	+	SPAC23H4.18c	utr3	middle	17.75	0.0516865
I	1576264	1576290	1576275	+	SPAC23H4.18c	utr3	last	48.9167	0.142441
I	1579391	1579403	1579391	+	SPAC23H4.16c	coding_exon	CDS	10	0.307377
I	1579646	1579673	1579662	+	SPAC23H4.16c	utr3_extended	first	19.3333	0.594262
I	1579673	1579686	1579675	+	SPAC23H4.16c	utr3_extended	last	13.2	0.405738
I	1587556	1587571	1587560	+	SPAC23H4.13c	utr3	single	13	1
I	1591693	1591710	1591697	+	SPAC23H4.10c	utr3	first	43.1	0.837978
I	1591754	1591769	1591759	+	SPAC23H4.10c	utr3	middle	5.5	0.106935
I	1592070	1592073	1592070	+	SPAC23H4.10c	utr3	last	8.33333	0.162022
I	1595942	1595955	1595944	+	SPAC23H4.07c	utr3	single	8.83333	1
I	1605002	1605021	1605009	+	SPAC23H4.03c	utr3	single	40.5	1
I	1611132	1611167	1611150	+	SPAC23H4.01c	utr3	single	118.667	1
I	1612664	1612679	1612670	+	SPAP27G11.02	utr3	single	10.1667	1
I	1635032	1635035	1635032	+	SPAP27G11.12	utr3_extended	single	12	1
I	1640637	1640650	1640647	+	SPAP27G11.15	utr3	first	6.83333	0.0583879
I	1641331	1641351	1641337	+	SPAP27G11.15	utr3_extended	last	110.2	0.941612
I	1642692	1642698	1642692	+	SPAC343.02	utr3	first	10.5	0.352518
I	1642766	1642781	1642774	+	SPAC343.02	utr3	last	19.2857	0.647482
I	1644358	1644386	1644378	+	SPAC343.03	utr3	first	20.6667	0.248696
I	1644386	1644408	1644397	+	SPAC343.03	utr3	last	62.4333	0.751304
I	1649293	1649323	1649311	+	SPAC343.05	utr3	first	80.25	0.538892
I	1649340	1649356	1649345	+	SPAC343.05	utr3	middle	6.25	0.0419698
I	1649390	1649424	1649406	+	SPAC343.05	utr3	last	68.6667	0.461108
I	1655546	1655558	1655555	+	SPAC343.09	utr3	first	5	0.0481773
I	1655709	1655711	1655709	+	SPAC343.09	utr3	middle	5.5	0.052995
I	1655773	1655798	1655782	+	SPAC343.09	utr3	middle	33.8333	0.326
I	1655810	1655828	1655816	+	SPAC343.09	utr3	middle	69.95	0.674
I	1655828	1655844	1655830	+	SPAC343.09	utr3_extended	last	14.9	0.143568
I	1658210	1658218	1658216	+	SPAC343.10	utr3	first	10.5	0.10928
I	1658344	1658355	1658347	+	SPAC343.10	utr3	last	85.5833	0.89072
I	1667938	1667941	1667938	+	SPAC343.21	utr3_extended	first	5	0.0454545
I	1668041	1668062	1668050	+	SPAC343.21	utr3_extended	middle	99.5	0.904545
I	1668081	1668095	1668083	+	SPAC343.21	utr3_extended	last	10.5	0.0954545
I	1669634	1669651	1669638	+	SPAC343.12	utr3	first	913	0.912088
I	1669651	1669666	1669654	+	SPAC343.12	utr3	last	88	0.0879121
I	1672153	1672179	1672167	+	SPAC343.13	utr3	first	5.46667	0.301471
I	1672190	1672206	1672203	+	SPAC343.13	utr3	last	12.6667	0.698529
I	1675303	1675343	1675322	+	SPAC343.15	utr3	first	8	0.292683
I	1675539	1675548	1675539	+	SPAC343.15	utr3	last	19.3333	0.707317
I	1677956	1677969	1677958	+	SPAC343.16	utr3	first	37.6667	0.127216
I	1677969	1677982	1677980	+	SPAC343.16	utr3	middle	12.8333	0.0433437
I	1678010	1678022	1678010	+	SPAC343.16	utr3	middle	6.06667	0.0204897
I	1678022	1678048	1678033	+	SPAC343.16	utr3	middle	99.1667	0.334928
I	1678048	1678064	1678049	+	SPAC343.16	utr3	middle	10.5	0.035463
I	1678095	1678109	1678107	+	SPAC343.16	utr3	middle	17.8333	0.0602308
I	1678109	1678139	1678120	+	SPAC343.16	utr3_extended	last	196.917	0.665072
I	1680607	1680620	1680612	+	SPAC343.18	coding_exon	CDS	26.8333	NA
I	1684115	1684124	1684117	+	SPAC343.19	utr3	single	17	1
I	1688650	1688666	1688663	+	SPAC824.02	utr3	first	16	0.581818
I	1688694	1688696	1688694	+	SPAC824.02	utr3	last	11.5	0.418182
I	1691570	1691573	1691570	+	SPAC824.04	utr3	first	16.3333	0.0869565
I	1691622	1691634	1691631	+	SPAC824.04	utr3	middle	5.5	0.0292813
I	1691707	1691718	1691711	+	SPAC824.04	utr3	last	171.5	0.913043
I	1696214	1696240	1696223	+	SPAC824.06	utr3	first	195.85	0.944538
I	1696417	1696426	1696417	+	SPAC824.06	utr3	last	11.5	0.0554618
I	1697632	1697641	1697637	+	SPAC824.07	utr3	first	54.75	0.041352
I	1697659	1697673	1697660	+	SPAC824.07	utr3	middle	51.25	0.0387085
I	1697673	1697702	1697686	+	SPAC824.07	utr3	middle	1269.25	0.958648
I	1697702	1697730	1697717	+	SPAC824.07	utr3	last	32.0833	0.0242321
I	1697950	1697960	1697954	+	SPAC824.08	utr5	utr5	5.5	0.0557809
I	1699975	1699982	1699975	+	SPAC824.08	utr3	first	21	0.212982
I	1700143	1700173	1700158	+	SPAC824.08	utr3	last	77.6	0.787018
I	1710284	1710299	1710290	+	SPAC664.03	utr3	first	8.5	0.4
I	1710342	1710347	1710343	+	SPAC664.03	utr3	middle	12.75	0.6
I	1710508	1710513	1710508	+	SPAC664.03	utr3_extended	last	7.16667	0.337255
I	1711857	1711889	1711877	+	SPAC664.05	utr3	first	1207.67	0.528288
I	1711889	1711911	1711900	+	SPAC664.05	utr3	middle	1078.33	0.471712
I	1711911	1711933	1711918	+	SPAC664.05	utr3	middle	332.5	0.145451
I	1712003	1712026	1712012	+	SPAC664.05	utr3	last	52.5	0.0229659
I	1713780	1713805	1713793	+	SPAC664.06	utr3	first	18.4667	0.0489226
I	1713893	1713911	1713900	+	SPAC664.06	utr3	last	359	0.951077
I	1721476	1721485	1721476	+	SPAC664.09	utr3	first	6.5	0.248408
I	1721679	1721694	1721692	+	SPAC664.09	utr3	last	19.6667	0.751592
I	1724847	1724873	1724854	+	SPAC664.10	utr3	single	22	1
I	1728070	1728091	1728076	+	SPAC664.11	utr3	first	81.3095	0.270131
I	1728091	1728118	1728114	+	SPAC664.11	utr3	middle	13.3095	0.0442177
I	1728118	1728144	1728130	+	SPAC664.11	utr3	middle	107.5	0.357143
I	1728144	1728172	1728158	+	SPAC664.11	utr3	middle	34.6	0.11495
I	1728172	1728197	1728186	+	SPAC664.11	utr3	middle	193.5	0.642857
I	1728197	1728220	1728204	+	SPAC664.11	utr3_extended	middle	87.25	0.289867
I	1728284	1728315	1728299	+	SPAC664.11	utr3_extended	last	7.23333	0.024031
I	1733469	1733483	1733471	+	SPAC664.14	utr3_extended	single	38.6667	1
I	1737249	1737253	1737249	+	SPAC664.15	utr3	single	9	1
I	1753144	1753168	1753154	+	SPAC17A5.01	utr3	single	6.16667	1
I	1757309	1757336	1757324	+	SPAC17A5.03	utr3	single	121109	1
I	1764634	1764662	1764647	+	SPAC17A5.06	utr3_extended	single	7.75	1
I	1768466	1768477	1768466	+	SPAC17A5.08	utr3	first	10	0.368098
I	1768642	1768653	1768643	+	SPAC17A5.08	utr3	last	17.1667	0.631902
I	1771855	1771874	1771863	+	SPAC17A5.10	utr3	single	7.75	1
I	1773997	1774002	1773997	+	SPAC17A5.11	coding_exon	CDS	5.8	NA
I	1774295	1774315	1774304	+	SPAC17A5.12	coding_exon	CDS	12.2	NA
I	1776631	1776642	1776635	+	SPAC17A5.13	intron	intron	27.5	NA
I	1782727	1782750	1782732	+	SPAC17A5.14	utr3	single	23.5	1
I	1788106	1788119	1788111	+	SPAC17A5.16	intron	intron	241	NA
I	1788482	1788502	1788495	+	SPAC17A5.16	intron	intron	7	NA
I	1797938	1797940	1797938	+	SPAC1610.04	utr3	first	12.5	0.292969
I	1797996	1798004	1798002	+	SPAC1610.04	utr3	last	30.1667	0.707031
I	1800058	1800075	1800064	+	SPAC1002.02	utr3_extended	first	430.5	0.9202
I	1800075	1800096	1800075	+	SPAC1002.02	utr3_extended	last	37.3333	0.0798005
I	1826158	1826172	1826160	+	SPAC1002.14	utr3	first	148	0.951768
I	1826172	1826189	1826173	+	SPAC1002.14	utr3	last	7.5	0.0482315
I	1833804	1833817	1833810	+	SPAC1002.18	utr3	single	67.8333	1
I	1837053	1837058	1837055	+	SPAC1002.19	utr3	single	25.6667	1
I	1861802	1861812	1861802	+	SPAPB1A10.02	utr5	utr5	13.6667	NA
I	1863661	1863667	1863661	+	SPAPB1A10.03	coding_exon	CDS	5.66667	NA
I	1867203	1867212	1867204	+	SPAPB1A10.05	coding_exon	CDS	8.75	NA
I	1867922	1867933	1867922	+	SPAPB1A10.05	coding_exon	CDS	5.16667	NA
I	1877847	1877876	1877855	+	SPAPB1A10.08	utr3	single	30.75	1
I	1880638	1880658	1880655	+	SPAPB1A10.09	utr3	single	51.5	1
I	1889383	1889406	1889392	+	SPAPB1A10.13	utr3	first	42.9167	0.261289
I	1889406	1889437	1889419	+	SPAPB1A10.13	utr3	middle	115.75	0.704718
I	1889490	1889499	1889490	+	SPAPB1A10.13	utr3	middle	33	0.200913
I	1889546	1889555	1889552	+	SPAPB1A10.13	utr3	middle	5.83333	0.035515
I	1889757	1889773	1889757	+	SPAPB1A10.13	utr3	middle	18.6667	0.113648
I	1889795	1889807	1889795	+	SPAPB1A10.13	utr3	last	48.5	0.295282
I	1891830	1891839	1891837	+	SPAPB1A10.14	utr3	first	6.5	0.094431
I	1891874	1891881	1891878	+	SPAPB1A10.14	utr3	middle	8.5	0.123487
I	1891900	1891913	1891900	+	SPAPB1A10.14	utr3	middle	32	0.464891
I	1891913	1891939	1891916	+	SPAPB1A10.14	utr3	middle	36.8333	0.535109
I	1891959	1891965	1891959	+	SPAPB1A10.14	utr3	last	8	0.116223
I	1892801	1892813	1892807	+	SPAPB1A10.15	intron	intron	5.5	NA
I	1893826	1893846	1893837	+	SPAPB1A10.15	utr3	single	13.5833	1
I	1896509	1896527	1896515	+	SPAC140.01	utr3	first	170.167	0.490865
I	1896527	1896546	1896539	+	SPAC140.01	utr3	middle	176.5	0.509135
I	1896628	1896637	1896628	+	SPAC140.01	utr3	middle	36	0.103846
I	1896674	1896707	1896689	+	SPAC140.01	utr3	middle	57.85	0.166875
I	1897120	1897123	1897120	+	SPAC140.01	utr3_extended	last	7.33333	0.0211538
I	1899111	1899127	1899113	+	SPAC140.02	utr3	first	66.25	0.237739
I	1899284	1899294	1899284	+	SPAC140.02	utr3	middle	6.91667	0.0248206
I	1899393	1899423	1899412	+	SPAC140.02	utr3	middle	104.333	0.374402
I	1899423	1899439	1899428	+	SPAC140.02	utr3	middle	92.8333	0.333134
I	1899450	1899460	1899452	+	SPAC140.02	utr3	last	174.333	0.625598
I	1901553	1901576	1901555	+	SPAC140.03	utr3	single	12.75	1
I	1911629	1911648	1911646	+	SPAC110.01	utr3	first	6.33333	0.475
I	1911746	1911748	1911746	+	SPAC110.01	utr3	last	7	0.525
I	1913377	1913379	1913377	+	SPAC110.02	coding_exon	CDS	7	NA
I	1915886	1915897	1915895	+	SPAC110.02	utr3	single	9.5	1
I	1917523	1917543	1917527	+	SPAC110.03	utr3	first	1275.5	0.346721
I	1917636	1917662	1917651	+	SPAC110.03	utr3	middle	2403.25	0.653279
I	1917662	1917684	1917673	+	SPAC110.03	utr3_extended	last	209.167	0.0568581
I	1923763	1923772	1923768	+	SPAP14E8.02	coding_exon	CDS	5	0.0544959
I	1924842	1924862	1924858	+	SPAP14E8.02	utr3	first	10.0833	0.1099
I	1924906	1924919	1924912	+	SPAP14E8.02	utr3	middle	24.5	0.26703
I	1924919	1924949	1924932	+	SPAP14E8.02	utr3_extended	last	67.25	0.73297
I	1926303	1926318	1926308	+	SPAP14E8.03	utr3	first	37.5	0.76661
I	1926363	1926365	1926363	+	SPAP14E8.03	utr3	middle	7	0.143101
I	1926509	1926518	1926509	+	SPAP14E8.03	utr3	last	11.4167	0.23339
I	1927782	1927807	1927789	+	SPAP14E8.04	utr3	first	255.167	0.921734
I	1927832	1927857	1927849	+	SPAP14E8.04	utr3	last	21.6667	0.0782661
I	1935807	1935817	1935812	+	SPAC3H1.03	utr3	first	5.43333	0.363839
I	1935907	1935924	1935908	+	SPAC3H1.03	utr3	last	9.5	0.636161
I	1939028	1939038	1939031	+	SPAC3H1.05	intron	intron	6	0.0790514
I	1940425	1940436	1940425	+	SPAC3H1.05	utr3	first	36	0.474308
I	1940436	1940458	1940447	+	SPAC3H1.05	utr3	middle	39.9	0.525692
I	1940458	1940483	1940467	+	SPAC3H1.05	utr3	middle	19.3333	0.254721
I	1940495	1940519	1940502	+	SPAC3H1.05	utr3	last	29.1667	0.384278
I	1945277	1945302	1945288	+	SPAC3H1.07	utr3	first	66.2262	0.044625
I	1945348	1945376	1945366	+	SPAC3H1.07	utr3	last	1417.83	0.955375
I	1951078	1951102	1951091	+	SPAC3H1.10	utr3	first	8.33333	0.15625
I	1951194	1951205	1951199	+	SPAC3H1.10	utr3	last	45	0.84375
I	1958531	1958541	1958533	+	SPAC3H1.11	utr5	utr5	30.5	0.392872
I	1958773	1958777	1958774	+	SPAC3H1.11	utr5	utr5	8.66667	0.111636
I	1959155	1959159	1959155	+	SPAC3H1.11	utr5	utr5	5.75	0.0740661
I	1961510	1961517	1961510	+	SPAC3H1.11	utr3	first	25.8333	0.332761
I	1961530	1961551	1961544	+	SPAC3H1.11	utr3	middle	51.8	0.667239
I	1961551	1961561	1961558	+	SPAC3H1.11	utr3_extended	last	7.66667	0.0987548
I	1966347	1966378	1966364	+	SPAC3H1.13	utr3	first	6.5	0.464286
I	1966430	1966448	1966432	+	SPAC3H1.13	utr3	last	7.5	0.535714
I	1973502	1973519	1973508	+	SPAC9G1.02	utr3	first	45.3333	0.618182
I	1973519	1973538	1973530	+	SPAC9G1.02	utr3	middle	5.16667	0.0704545
I	1973550	1973560	1973550	+	SPAC9G1.02	utr3	last	28	0.381818
I	1976169	1976172	1976170	+	SPAC9G1.04	intron	intron	21	NA
I	1976204	1976215	1976209	+	SPAC9G1.04	coding_exon	CDS	12.1667	NA
I	1976611	1976628	1976617	+	SPAC9G1.04	utr3_extended	single	13	1
I	1979095	1979128	1979115	+	SPAC9G1.05	utr3	single	47.4583	1
I	1984411	1984425	1984419	+	SPAC9G1.07	coding_exon	CDS	30	1.60714
I	1984531	1984557	1984541	+	SPAC9G1.07	utr3	first	10.6667	0.571429
I	1984905	1984922	1984911	+	SPAC9G1.07	utr3_extended	last	8	0.428571
I	1989144	1989159	1989147	+	SPAC9G1.09	utr3	single	12.6	1
I	1995049	1995073	1995059	+	SPAC9G1.12	utr3	first	23.8833	0.1429
I	1995113	1995127	1995115	+	SPAC9G1.12	utr3	middle	8.85714	0.0529945
I	1995138	1995151	1995146	+	SPAC9G1.12	utr3	last	143.25	0.8571
I	2004778	2004797	2004786	+	SPAC17H9.01	utr3	single	8.58333	1
I	2007996	2008001	2007999	+	SPAC17H9.02	utr3	first	6.16667	0.45122
I	2008050	2008054	2008052	+	SPAC17H9.02	utr3	last	7.5	0.54878
I	2013975	2014006	2013995	+	SPAC17H9.05	utr3	first	153.5	0.959375
I	2014755	2014766	2014760	+	SPAC17H9.05	utr3	last	6.5	0.040625
I	2017050	2017078	2017057	+	SPAC17H9.07	utr3	first	269.083	0.795908
I	2017165	2017181	2017172	+	SPAC17H9.07	utr3	middle	69	0.204092
I	2017528	2017540	2017528	+	SPAC17H9.07	utr3	last	7.5	0.0221839
I	2019391	2019401	2019391	+	SPAC17H9.08	utr3	first	7.83333	0.51087
I	2019549	2019554	2019551	+	SPAC17H9.08	utr3	last	7.5	0.48913
I	2025973	2025984	2025974	+	SPAC17H9.11	utr3	single	12.1667	1
I	2031802	2031826	2031815	+	SPAC17H9.16	utr3	first	32.4	0.372129
I	2031944	2031953	2031944	+	SPAC17H9.16	utr3	middle	8	0.0918836
I	2031976	2032003	2031986	+	SPAC17H9.16	utr3	middle	13.8333	0.158882
I	2032105	2032122	2032111	+	SPAC17H9.16	utr3	last	54.6667	0.627871
I	2039533	2039547	2039533	+	SPAC17H9.20	utr3	first	10.8333	0.625
I	2039924	2039930	2039928	+	SPAC17H9.20	utr3	last	6.5	0.375
I	2043305	2043327	2043322	+	SPAC607.04	utr3	single	8.95	1
I	2045103	2045124	2045105	+	SPAC607.05	utr3	first	55.5	0.843038
I	2045149	2045161	2045154	+	SPAC607.05	utr3	last	10.3333	0.156962
I	2057069	2057077	2057071	+	SPAC607.10	utr3	single	6.83333	1
I	2058581	2058583	2058581	+	SPAC732.01	utr3	first	10.5	0.0724846
I	2058804	2058812	2058809	+	SPAC732.01	utr3_extended	middle	5	0.0345165
I	2058991	2059007	2059003	+	SPAC732.01	utr3_extended	middle	22.75	0.15705
I	2059007	2059039	2059022	+	SPAC732.01	utr3_extended	middle	116.4	0.803544
I	2059051	2059060	2059054	+	SPAC732.01	utr3_extended	middle	9	0.0621297
I	2059110	2059136	2059125	+	SPAC732.01	utr3_extended	middle	28.4583	0.196456
I	2059136	2059148	2059145	+	SPAC732.01	utr3_extended	last	8.66667	0.0598286
I	2071457	2071474	2071462	+	SPAC3C7.04	utr3	first	7.11667	0.211701
I	2071602	2071620	2071609	+	SPAC3C7.04	utr3	last	26.5	0.788299
I	2084937	2084950	2084937	+	SPAC3C7.09	utr3	single	11.5	1
I	2086158	2086171	2086163	+	SPAC3C7.10	utr3	first	8.08333	0.610063
I	2086376	2086397	2086382	+	SPAC3C7.10	utr3	last	5.16667	0.389937
I	2091270	2091285	2091276	+	SPAC3C7.12	utr3	single	38.1667	1
I	2103437	2103447	2103440	+	SPAC25A8.02	coding_exon	CDS	19.3333	NA
I	2103541	2103555	2103553	+	SPAC25A8.02	coding_exon	CDS	13.5	NA
I	2104028	2104058	2104045	+	SPAC25A8.02	utr3	single	5.75	1
I	2105872	2105880	2105877	+	SPAC631.02	utr5	utr5	23.5	NA
I	2107280	2107304	2107282	+	SPAC631.02	utr5	utr5	29	NA
I	2112895	2112915	2112904	+	SPAC20H4.01	coding_exon	CDS	114.333	3.51795
I	2113440	2113458	2113442	+	SPAC20H4.01	utr3	first	5.5	0.169231
I	2113458	2113482	2113474	+	SPAC20H4.01	utr3	middle	7.16667	0.220513
I	2113751	2113773	2113753	+	SPAC20H4.01	utr3	middle	24	0.738462
I	2113807	2113811	2113809	+	SPAC20H4.01	utr3	last	8.5	0.261538
I	2114810	2114832	2114816	+	SPAC20H4.02	utr3	first	130.333	0.73983
I	2114866	2114888	2114867	+	SPAC20H4.02	utr3	middle	45.8333	0.26017
I	2114888	2114912	2114908	+	SPAC20H4.02	utr3	middle	18	0.102176
I	2114928	2114934	2114928	+	SPAC20H4.02	utr3	last	15	0.0851466
I	2120233	2120246	2120233	+	SPAC20H4.04	utr3	single	6.16667	1
I	2124345	2124355	2124349	+	SPAC20H4.07	coding_exon	CDS	52.8333	NA
I	2124384	2124401	2124387	+	SPAC20H4.07	coding_exon	CDS	5.5	NA
I	2124500	2124516	2124503	+	SPAC20H4.07	utr3	single	11	1
I	2125838	2125843	2125840	+	SPAC20H4.08	utr3	first	9.33333	0.4375
I	2125900	2125907	2125905	+	SPAC20H4.08	utr3	middle	12	0.5625
I	2125964	2125976	2125964	+	SPAC20H4.08	utr3	last	7	0.328125
I	2135068	2135078	2135069	+	SPAC23C11.01	utr3	first	10	0.125261
I	2135109	2135139	2135124	+	SPAC23C11.01	utr3	middle	6.91667	0.0866388
I	2135139	2135166	2135153	+	SPAC23C11.01	utr3	last	69.8333	0.874739
I	2137268	2137273	2137268	+	SPAC23C11.03	coding_exon	CDS	7.2	0.0774888
I	2138022	2138039	2138027	+	SPAC23C11.03	utr3	first	55.9167	0.601794
I	2138039	2138054	2138050	+	SPAC23C11.03	utr3_extended	last	37	0.398206
I	2141427	2141457	2141446	+	SPAC23C11.05	utr3	first	9511.5	0.844416
I	2141457	2141478	2141459	+	SPAC23C11.05	utr3	last	1752.5	0.155584
I	2150146	2150168	2150149	+	SPAC23C11.09	utr3	first	15.2	0.042827
I	2150182	2150216	2150195	+	SPAC23C11.09	utr3_extended	middle	324.917	0.915473
I	2150549	2150563	2150556	+	SPAC23C11.09	utr3_extended	last	30	0.0845269
I	2153963	2153985	2153979	+	SPAC23C11.11	utr3	first	18.25	0.0354828
I	2153985	2154013	2153995	+	SPAC23C11.11	utr3	middle	467.833	0.909592
I	2154013	2154044	2154030	+	SPAC23C11.11	utr3	last	46.5	0.0904083
I	2160008	2160032	2160026	+	SPAC23C11.14	utr3	first	1108.5	0.86444
I	2160055	2160085	2160072	+	SPAC23C11.14	utr3	middle	173.833	0.13556
I	2160085	2160100	2160085	+	SPAC23C11.14	utr3	last	19.5	0.0152067
I	2162914	2162921	2162914	+	SPAC23C11.15	coding_exon	CDS	6.91667	0.0191774
I	2163970	2164002	2163990	+	SPAC23C11.15	utr3	first	192.833	0.534658
I	2164002	2164024	2164008	+	SPAC23C11.15	utr3	middle	167.833	0.465342
I	2164024	2164045	2164024	+	SPAC23C11.15	utr3	middle	15	0.0415896
I	2164045	2164068	2164055	+	SPAC23C11.15	utr3	last	20.5833	0.0570702
I	2166684	2166693	2166684	+	SPAC23C11.16	utr3	single	24.3333	1
I	2168801	2168806	2168801	+	SPAC23C11.17	utr3	first	15.5	0.648084
I	2169050	2169082	2169064	+	SPAC23C11.17	utr3_extended	middle	8.41667	0.351916
I	2169106	2169108	2169106	+	SPAC23C11.17	utr3_extended	last	5	0.209059
I	2181340	2181352	2181340	+	SPAC13F5.05	utr3	first	17.3333	0.641975
I	2181352	2181367	2181354	+	SPAC13F5.05	utr3	middle	9.66667	0.358025
I	2181389	2181397	2181389	+	SPAC13F5.05	utr3	last	7.16667	0.265432
I	2192092	2192106	2192102	+	SPAC1783.03	utr3	single	14.3333	1
I	2199328	2199342	2199330	+	SPAC1783.05	utr3	single	20.3	1
I	2216988	2217008	2216998	+	SPAC18G6.03	utr3	first	38	0.0567588
I	2217074	2217098	2217088	+	SPAC18G6.03	utr3	last	631.5	0.943241
I	2229992	2230015	2230005	+	SPAC18G6.06	utr3	first	43	0.701087
I	2230056	2230065	2230056	+	SPAC18G6.06	utr3	last	18.3333	0.298913
I	2236614	2236616	2236615	+	SPAC18G6.10	coding_exon	CDS	10	0.0606061
I	2236658	2236664	2236658	+	SPAC18G6.10	coding_exon	CDS	7	0.0424242
I	2236677	2236693	2236683	+	SPAC18G6.10	utr3	first	7.5	0.0454545
I	2236729	2236748	2236737	+	SPAC18G6.10	utr3	middle	139.833	0.847475
I	2236748	2236759	2236753	+	SPAC18G6.10	utr3	last	25.1667	0.152525
I	2245131	2245147	2245135	+	SPAC18G6.15	utr3	first	6.66667	0.39604
I	2245415	2245424	2245421	+	SPAC18G6.15	utr3_extended	last	10.1667	0.60396
I	2247096	2247104	2247099	+	SPAC13D6.01	utr3	single	10	1
I	2254354	2254362	2254354	+	SPAC13D6.05	utr3	single	8.25	1
I	2255624	2255640	2255629	+	SPAC4G9.02	utr3	first	5.83333	0.309735
I	2255640	2255664	2255650	+	SPAC4G9.02	utr3	last	13	0.690265
I	2256658	2256659	2256658	+	SPAC4G9.03	utr3	first	135	0.766175
I	2256693	2256715	2256698	+	SPAC4G9.03	utr3	last	41.2	0.233825
I	2259380	2259389	2259387	+	SPAC4G9.05	utr5	utr5	8	NA
I	2275301	2275305	2275301	+	SPAC4G9.10	utr3	first	18.5	0.381181
I	2275374	2275407	2275388	+	SPAC4G9.10	utr3	middle	9.25	0.190591
I	2275490	2275511	2275494	+	SPAC4G9.10	utr3	last	30.0333	0.618819
I	2277998	2278021	2278003	+	SPAC4G9.12	utr3	first	91	0.934932
I	2278059	2278074	2278062	+	SPAC4G9.12	utr3	last	6.33333	0.0650685
I	2281685	2281719	2281700	+	SPAC4G9.14	utr3	first	77.5	0.752427
I	2281783	2281793	2281785	+	SPAC4G9.14	utr3	middle	25.5	0.247573
I	2281824	2281835	2281828	+	SPAC4G9.14	utr3	middle	12	0.116505
I	2281863	2281887	2281877	+	SPAC4G9.14	utr3_extended	last	15.0833	0.14644
I	2283421	2283434	2283422	+	SPAC4G9.15	utr3	first	21.5	0.445596
I	2283480	2283507	2283487	+	SPAC4G9.15	utr3	last	26.75	0.554404
I	2288328	2288334	2288328	+	SPAC4G9.19	utr3	single	9	1
I	2291746	2291754	2291752	+	SPAC4G9.22	utr5	utr5	7.5	NA
I	2291830	2291841	2291840	+	SPAC4G9.22	utr5	utr5	11.5	NA
I	2292705	2292716	2292707	+	SPAC4G9.22	utr3	single	25.5	1
I	2299974	2299983	2299974	+	SPAC13G7.03	utr3	first	13	0.123908
I	2300042	2300045	2300042	+	SPAC13G7.03	utr3	middle	6.66667	0.0635425
I	2300056	2300072	2300057	+	SPAC13G7.03	utr3	last	91.9167	0.876092
I	2306958	2306971	2306958	+	SPAC13G7.05	utr3	first	20.5	0.694915
I	2307135	2307140	2307135	+	SPAC13G7.05	utr3	last	9	0.305085
I	2308632	2308639	2308636	+	SPAC13G7.06	utr3	first	118	0.954913
I	2308791	2308798	2308791	+	SPAC13G7.06	utr3	last	5.57143	0.0450867
I	2309420	2309423	2309420	+	SPAC13G7.07	coding_exon	CDS	5	NA
I	2315425	2315442	2315426	+	SPAC13G7.10	utr3_extended	single	7.625	1
I	2316187	2316206	2316195	+	SPAC13G7.11	utr3	single	11.6667	1
I	2328478	2328487	2328485	+	SPAC6C3.04	intron	intron	21.5	0.10741
I	2330133	2330147	2330141	+	SPAC6C3.04	utr3	first	181	0.904246
I	2330172	2330185	2330176	+	SPAC6C3.04	utr3	middle	9.5	0.0474604
I	2330235	2330259	2330245	+	SPAC6C3.04	utr3	middle	19.1667	0.0957535
I	2330259	2330294	2330273	+	SPAC6C3.04	utr3	last	18.7167	0.0935054
I	2341232	2341252	2341237	+	SPAC6C3.09	utr3	single	85.3333	1
I	2345865	2345873	2345871	+	SPAC17G8.02	utr3	first	8.5	0.414634
I	2346039	2346049	2346039	+	SPAC17G8.02	utr3	last	12	0.585366
I	2350919	2350933	2350919	+	SPAC17G8.05	coding_exon	CDS	12.75	0.894737
I	2351037	2351054	2351037	+	SPAC17G8.05	utr3	first	8.75	0.614035
I	2351054	2351073	2351070	+	SPAC17G8.05	utr3	last	5.5	0.385965
I	2355087	2355111	2355100	+	SPAC17G8.07	utr3	first	165.5	0.894595
I	2355111	2355122	2355111	+	SPAC17G8.07	utr3	last	19.5	0.105405
I	2358340	2358352	2358347	+	SPAC17G8.09	utr3	first	218.9	0.216486
I	2358352	2358383	2358363	+	SPAC17G8.09	utr3	last	792.25	0.783514
I	2365704	2365705	2365704	+	SPAC17G8.12	utr3	first	5	0.10084
I	2366100	2366122	2366102	+	SPAC17G8.12	utr3	middle	28.0833	0.566387
I	2366361	2366371	2366366	+	SPAC17G8.12	utr3	middle	12.6	0.254118
I	2367029	2367046	2367036	+	SPAC17G8.12	utr3	last	21.5	0.433613
I	2372741	2372743	2372741	+	SPAC22H10.02	utr3	first	5	0.151362
I	2372754	2372762	2372756	+	SPAC22H10.02	utr3	middle	21.8333	0.660949
I	2372828	2372839	2372831	+	SPAC22H10.02	utr3	last	11.2	0.339051
I	2378551	2378564	2378551	+	SPAC22H10.04	utr3	first	12	0.654545
I	2378669	2378690	2378669	+	SPAC22H10.04	utr3	last	6.33333	0.345455
I	2382120	2382139	2382137	+	SPAC22H10.13	utr3	single	18.3333	1
I	2383051	2383079	2383066	+	SPAC22H10.07	utr5	utr5	9.08333	NA
I	2384985	2384993	2384987	+	SPAC22H10.07	utr3	single	27	1
I	2387472	2387490	2387479	+	SPAC22H10.08	utr3	first	641.333	0.985403
I	2388096	2388107	2388103	+	SPAC22H10.08	utr3_extended	last	9.5	0.0145967
I	2389764	2389779	2389765	+	SPAC22H10.09	utr3	first	24.6667	0.507545
I	2389807	2389830	2389812	+	SPAC22H10.09	utr3	middle	14.5	0.298354
I	2389844	2389856	2389851	+	SPAC22H10.09	utr3	middle	10.1667	0.209191
I	2389856	2389874	2389868	+	SPAC22H10.09	utr3	last	23.9333	0.492455
I	2400570	2400585	2400578	+	SPAC15F9.02	utr3	first	7.5	0.56962
I	2400699	2400706	2400699	+	SPAC15F9.02	utr3	last	5.66667	0.43038
I	2407971	2407973	2407971	+	SPAC1B9.03c	utr3	first	7.5	0.0970874
I	2408024	2408047	2408036	+	SPAC1B9.03c	utr3	middle	53.75	0.695793
I	2408047	2408059	2408052	+	SPAC1B9.03c	utr3	last	23.5	0.304207
I	2416702	2416707	2416702	+	SPAC6B12.18	utr3	single	17.3333	1
I	2435514	2435534	2435521	+	SPAC6B12.12	utr3	first	371.333	0.835709
I	2435534	2435554	2435537	+	SPAC6B12.12	utr3	middle	73	0.164291
I	2435609	2435625	2435619	+	SPAC6B12.12	utr3	last	37.6667	0.0847712
I	2436638	2436659	2436638	+	SPAC6B12.13	utr3	first	17	0.481132
I	2436659	2436681	2436679	+	SPAC6B12.13	utr3	middle	6.83333	0.193396
I	2436784	2436809	2436799	+	SPAC6B12.13	utr3	middle	18.3333	0.518868
I	2436932	2436942	2436940	+	SPAC6B12.13	utr3	last	8.5	0.240566
I	2439713	2439731	2439724	+	SPAC6B12.15	intron	intron	336.25	0.19595
I	2440491	2440506	2440499	+	SPAC6B12.15	intron	intron	59.6667	0.0347708
I	2440945	2440966	2440951	+	SPAC6B12.15	utr3	first	1059	0.617133
I	2440966	2440992	2440981	+	SPAC6B12.15	utr3	middle	486	0.283217
I	2440992	2441013	2440994	+	SPAC6B12.15	utr3	middle	35.75	0.0208333
I	2441013	2441036	2441023	+	SPAC6B12.15	utr3	middle	586.75	0.341929
I	2441036	2441059	2441048	+	SPAC6B12.15	utr3_extended	middle	657	0.382867
I	2441059	2441085	2441068	+	SPAC6B12.15	utr3_extended	last	375.333	0.218726
I	2446620	2446622	2446620	+	SPAC32A11.01	coding_exon	CDS	5.5	NA
I	2446684	2446687	2446684	+	SPAC32A11.01	coding_exon	CDS	9	NA
I	2465550	2465559	2465557	+	SPAC19A8.11c	coding_exon	CDS	6.5	0.17931
I	2466293	2466310	2466296	+	SPAC19A8.11c	utr3	first	26	0.717241
I	2466310	2466344	2466323	+	SPAC19A8.11c	utr3	middle	10.0667	0.277701
I	2466512	2466534	2466516	+	SPAC19A8.11c	utr3	last	10.25	0.282759
I	2475661	2475678	2475667	+	SPAC19A8.07c	utr3	first	80.3333	0.681754
I	2475751	2475763	2475757	+	SPAC19A8.07c	utr3	last	37.5	0.318246
I	2480022	2480031	2480026	+	SPAC19A8.05c	utr3	first	138.5	0.963814
I	2480044	2480049	2480044	+	SPAC19A8.05c	utr3_extended	last	5.2	0.0361865
I	2494279	2494292	2494279	+	SPAC19A8.01c	utr3	single	40.5	1
I	2505296	2505313	2505306	+	SPAC23H3.06	utr3	first	6.08333	0.207386
I	2505371	2505380	2505377	+	SPAC23H3.06	utr3	middle	7	0.238636
I	2505931	2505955	2505944	+	SPAC23H3.06	utr3	last	22.3333	0.761364
I	2523346	2523363	2523353	+	SPAC23H3.14	utr3	first	6.08333	0.398907
I	2523450	2523464	2523450	+	SPAC23H3.14	utr3	last	9.16667	0.601093
I	2529936	2529939	2529937	+	SPAC25H1.04	utr3_extended	single	15	1
I	2531055	2531062	2531061	+	SPAC25H1.05	utr3	first	27.5	0.108696
I	2531100	2531122	2531107	+	SPAC25H1.05	utr3	middle	21.2667	0.084058
I	2531122	2531139	2531136	+	SPAC25H1.05	utr3	middle	20.5	0.0810277
I	2531177	2531189	2531184	+	SPAC25H1.05	utr3	middle	6	0.0237154
I	2531201	2531210	2531206	+	SPAC25H1.05	utr3_extended	last	225.5	0.891304
I	2532693	2532708	2532696	+	SPAC25H1.06	utr3	single	83	1
I	2536549	2536564	2536557	+	SPAC25H1.07	utr3	single	55.8	1
I	2545282	2545297	2545282	+	SPAC4A8.04	utr5	utr5	34.3333	NA
I	2546977	2546985	2546978	+	SPAC4A8.04	utr3	single	13	1
I	2577818	2577844	2577824	+	SPAC4A8.14	utr3	first	95.3333	0.639821
I	2577904	2577926	2577915	+	SPAC4A8.14	utr3	last	53.6667	0.360179
I	2587468	2587485	2587470	+	SPAC823.03	utr3	single	7	1
I	2592486	2592498	2592486	+	SPAC823.07	utr3	first	30	0.737705
I	2592526	2592542	2592534	+	SPAC823.07	utr3	middle	10.6667	0.262295
I	2592639	2592642	2592640	+	SPAC823.07	utr3_extended	last	9.5	0.233607
I	2599865	2599881	2599865	+	SPAC823.11	utr3	first	74	0.436578
I	2599969	2599983	2599972	+	SPAC823.11	utr3	middle	95.5	0.563422
I	2599983	2600007	2599993	+	SPAC823.11	utr3	middle	70.3333	0.414946
I	2600237	2600265	2600254	+	SPAC823.11	utr3	last	12.8	0.0755162
I	2603207	2603220	2603207	+	SPAC823.12	coding_exon	CDS	5.25	NA
I	2604159	2604180	2604169	+	SPAC823.12	utr3	single	11.4167	1
I	2607221	2607240	2607230	+	SPAC823.14	utr3	first	11	0.0750853
I	2607318	2607333	2607330	+	SPAC823.14	utr3	middle	95	0.648464
I	2607362	2607387	2607381	+	SPAC823.14	utr3	last	51.5	0.351536
I	2609164	2609176	2609166	+	SPAC823.15	utr3	first	117.333	0.893401
I	2609214	2609225	2609214	+	SPAC823.15	utr3	middle	14	0.106599
I	2609225	2609238	2609225	+	SPAC823.15	utr3	last	6	0.0456853
I	2612830	2612841	2612830	+	SPAC7D4.14c	utr3	first	10.8333	0.601852
I	2612921	2612940	2612933	+	SPAC7D4.14c	utr3	last	7.16667	0.398148
I	2613345	2613363	2613345	+	SPAC7D4.13c	intron	intron	11.5	0.0390492
I	2614326	2614342	2614339	+	SPAC7D4.13c	utr3	first	10.3333	0.0350877
I	2614460	2614484	2614472	+	SPAC7D4.13c	utr3	middle	284.167	0.964912
I	2614484	2614498	2614495	+	SPAC7D4.13c	utr3_extended	last	7.83333	0.0265988
I	2617503	2617515	2617510	+	SPAC7D4.12c	utr3	single	11	1
I	2625823	2625841	2625826	+	SPAC7D4.07c	utr3	first	12.5833	0.0605696
I	2625841	2625870	2625855	+	SPAC7D4.07c	utr3_extended	last	195.167	0.93943
I	2626994	2626996	2626994	+	SPAC7D4.06c	coding_exon	CDS	5	0.12
I	2627833	2627862	2627844	+	SPAC7D4.06c	utr3	first	35.6667	0.856
I	2627895	2627907	2627906	+	SPAC7D4.06c	utr3	last	6	0.144
I	2635868	2635871	2635868	+	SPAC7D4.03c	coding_exon	CDS	5	NA
I	2639586	2639607	2639586	+	SPAC7D4.02c	utr3	single	15.95	1
I	2645148	2645157	2645149	+	SPAC4F8.14c	utr3	first	15.375	0.120549
I	2645199	2645220	2645212	+	SPAC4F8.14c	utr3	middle	12.1667	0.0953937
I	2645231	2645258	2645245	+	SPAC4F8.14c	utr3	last	112.167	0.879451
I	2650318	2650329	2650324	+	SPAC4F8.13c	utr3	single	11.5	1
I	2657891	2657894	2657891	+	SPAC4F8.12c	utr3	first	7	0.0693069
I	2658014	2658024	2658018	+	SPAC4F8.12c	utr3	last	94	0.930693
I	2662362	2662366	2662362	+	SPAC4F8.10c	utr3	first	18	0.16534
I	2662404	2662435	2662414	+	SPAC4F8.10c	utr3	last	90.8667	0.83466
I	2667201	2667215	2667201	+	SPAC4F8.07c	utr3	first	6.33333	0.0272011
I	2667254	2667274	2667265	+	SPAC4F8.07c	utr3	middle	93	0.399427
I	2667326	2667351	2667339	+	SPAC4F8.07c	utr3	middle	139.833	0.600573
I	2667351	2667371	2667351	+	SPAC4F8.07c	utr3	last	52	0.223336
I	2670209	2670217	2670209	+	SPAC4F8.05c	utr3	first	11.25	0.372928
I	2670233	2670255	2670239	+	SPAC4F8.05c	utr3	middle	5.875	0.194751
I	2670255	2670276	2670271	+	SPAC4F8.05c	utr3	middle	14.1667	0.469613
I	2670321	2670334	2670329	+	SPAC4F8.05c	utr3	last	16	0.530387
I	2678538	2678550	2678541	+	SPAC644.04	utr3	first	8.83333	0.441667
I	2679100	2679107	2679106	+	SPAC644.04	utr3	last	11.1667	0.558333
I	2687682	2687686	2687682	+	SPAC644.07	coding_exon	CDS	5	NA
I	2689097	2689118	2689097	+	SPAC644.08	utr3	single	54.6667	1
I	2691032	2691053	2691042	+	SPAC644.09	utr3	first	20.7	0.663462
I	2691069	2691082	2691069	+	SPAC644.09	utr3	last	10.5	0.336538
I	2692230	2692246	2692232	+	SPAC644.10	utr3_extended	single	11.5	1
I	2697343	2697357	2697349	+	SPAC644.12	utr3	single	8	1
I	2700975	2700992	2700986	+	SPAC644.15	utr3	first	610.833	0.885908
I	2701005	2701016	2701005	+	SPAC644.15	utr3	middle	8.41667	0.0122069
I	2701044	2701076	2701058	+	SPAC644.15	utr3	middle	49.3333	0.0715494
I	2701076	2701108	2701094	+	SPAC644.15	utr3	middle	45.1667	0.0655064
I	2701120	2701142	2701126	+	SPAC644.15	utr3	middle	78.6667	0.114092
I	2701142	2701168	2701144	+	SPAC644.15	utr3	last	29.25	0.042422
I	2702957	2702961	2702957	+	SPAC644.16	utr3	first	8.5	0.566667
I	2703492	2703494	2703492	+	SPAC644.16	utr3_extended	last	6.5	0.433333
I	2709232	2709242	2709240	+	SPAPB2B4.02	utr3	first	5	0.110701
I	2709290	2709320	2709308	+	SPAPB2B4.02	utr3	middle	24.5	0.542435
I	2709407	2709418	2709410	+	SPAPB2B4.02	utr3_extended	middle	7	0.154982
I	2709482	2709491	2709488	+	SPAPB2B4.02	utr3_extended	middle	11.4167	0.252768
I	2709502	2709511	2709503	+	SPAPB2B4.02	utr3_extended	middle	20.6667	0.457565
I	2709568	2709579	2709568	+	SPAPB2B4.02	utr3_extended	middle	13.1667	0.291513
I	2709579	2709590	2709588	+	SPAPB2B4.02	utr3_extended	last	5	0.110701
I	2710056	2710066	2710064	+	SPAPB2B4.03	utr5	utr5	10.1667	0.345805
I	2712670	2712683	2712675	+	SPAPB2B4.03	utr3	first	7.5	0.255102
I	2712764	2712779	2712764	+	SPAPB2B4.03	utr3	last	21.9	0.744898
I	2722575	2722602	2722599	+	SPAPB2B4.05	utr3	first	9.41667	0.143401
I	2722602	2722628	2722617	+	SPAPB2B4.05	utr3	last	56.25	0.856599
I	2723859	2723882	2723870	+	SPAPB2B4.06	utr3	first	7.5	0.224551
I	2723969	2723979	2723977	+	SPAPB2B4.06	utr3	last	25.9	0.775449
I	2727298	2727301	2727298	+	SPAC6F6.01	coding_exon	CDS	30.3333	NA
I	2731536	2731566	2731554	+	SPAC6F6.01	coding_exon	CDS	6.75	NA
I	2741058	2741075	2741071	+	SPAC6F6.05	utr3	first	5.91667	0.03852
I	2741087	2741110	2741092	+	SPAC6F6.05	utr3	middle	40	0.260417
I	2741164	2741185	2741174	+	SPAC6F6.05	utr3	middle	14	0.0911458
I	2741185	2741197	2741185	+	SPAC6F6.05	utr3	middle	7.26667	0.047309
I	2741208	2741210	2741208	+	SPAC6F6.05	utr3	middle	17.5	0.113932
I	2741291	2741302	2741294	+	SPAC6F6.05	utr3	middle	6	0.0390625
I	2741302	2741323	2741312	+	SPAC6F6.05	utr3	middle	113.6	0.739583
I	2741323	2741346	2741334	+	SPAC6F6.05	utr3	middle	29.5167	0.192166
I	2741357	2741369	2741365	+	SPAC6F6.05	utr3	middle	12	0.078125
I	2741383	2741396	2741390	+	SPAC6F6.05	utr3	last	38.25	0.249023
I	2756246	2756279	2756258	+	SPAC6F6.12	utr3	single	15.8333	1
I	2762972	2762974	2762972	+	SPAC6F6.15	intron	intron	9	0.0913706
I	2763433	2763451	2763439	+	SPAC6F6.15	utr3	first	78.8333	0.800338
I	2763551	2763560	2763551	+	SPAC6F6.15	utr3	middle	6.5	0.0659898
I	2763595	2763603	2763596	+	SPAC6F6.15	utr3	last	19.6667	0.199662
I	2768401	2768404	2768401	+	SPAC6F6.17	coding_exon	CDS	5	0.00975927
I	2769129	2769136	2769129	+	SPAC6F6.17	coding_exon	CDS	30.5	0.0595316
I	2770636	2770666	2770648	+	SPAC6F6.17	utr3	first	370	0.722186
I	2770666	2770694	2770683	+	SPAC6F6.17	utr3	middle	142.333	0.277814
I	2770694	2770712	2770704	+	SPAC6F6.17	utr3_extended	middle	13.3333	0.0260247
I	2770879	2770894	2770880	+	SPAC6F6.17	utr3_extended	middle	5.7	0.0111256
I	2770930	2770950	2770939	+	SPAC6F6.17	utr3_extended	last	20.5	0.040013
I	2781050	2781059	2781050	+	SPAC1805.04	utr3	single	11.6667	1
I	2783275	2783286	2783285	+	SPAC1805.05	utr3_extended	first	17.8333	0.185764
I	2783286	2783310	2783297	+	SPAC1805.05	utr3_extended	last	78.1667	0.814236
I	2788709	2788720	2788709	+	SPAC1805.08	utr3	first	14.2	0.207047
I	2788732	2788740	2788734	+	SPAC1805.08	utr3_extended	middle	21.3333	0.311057
I	2788918	2788938	2788927	+	SPAC1805.08	utr3_extended	last	47.25	0.688943
I	2792869	2792900	2792882	+	SPAC1805.10	utr3	first	53.8333	0.915014
I	2795404	2795405	2795404	+	SPAC1805.10	utr3_extended	last	5	0.0849858
I	2795628	2795651	2795640	+	SPAC1805.13	utr3	single	5324.67	1
I	2804246	2804251	2804249	+	SPAC1805.17	intron	intron	5	0.166667
I	2807475	2807495	2807486	+	SPAC1805.17	coding_exon	CDS	16.6667	0.555556
I	2807807	2807824	2807808	+	SPAC1805.17	utr3	first	17.5	0.583333
I	2807980	2807996	2807985	+	SPAC1805.17	utr3	last	12.5	0.416667
I	2815411	2815447	2815426	+	SPAC1B2.04	utr3	first	2624.25	0.718562
I	2815447	2815478	2815467	+	SPAC1B2.04	utr3	last	1027.83	0.281438
I	2818233	2818269	2818249	+	SPAC1B2.05	utr3	first	23.6667	0.38172
I	2818446	2818466	2818463	+	SPAC1B2.05	utr3	middle	31	0.5
I	2818480	2818494	2818480	+	SPAC1B2.05	utr3	middle	31	0.5
I	2818609	2818619	2818611	+	SPAC1B2.05	utr3	last	8.33333	0.134409
I	2823442	2823475	2823455	+	SPAC3F10.03	utr3	first	176.167	0.444211
I	2823475	2823511	2823494	+	SPAC3F10.03	utr3	middle	220.417	0.555789
I	2823542	2823558	2823546	+	SPAC3F10.03	utr3	last	6.83333	0.0172305
I	2824421	2824431	2824423	+	SPAC3F10.04	coding_exon	CDS	33.5	1.76007
I	2825478	2825480	2825478	+	SPAC3F10.04	utr3	first	5.5	0.288967
I	2825494	2825496	2825494	+	SPAC3F10.04	utr3	middle	5.5	0.288967
I	2825585	2825607	2825601	+	SPAC3F10.04	utr3	middle	12.7	0.66725
I	2825644	2825654	2825652	+	SPAC3F10.04	utr3	last	6.33333	0.33275
I	2831360	2831368	2831360	+	SPAC3F10.19	utr3	first	6.5	0.0522088
I	2831444	2831446	2831444	+	SPAC3F10.19	utr3	middle	7	0.0562249
I	2831533	2831551	2831540	+	SPAC3F10.19	utr3	middle	102	0.819277
I	2831580	2831595	2831580	+	SPAC3F10.19	utr3	last	22.5	0.180723
I	2834063	2834073	2834063	+	SPAC3F10.09	utr3	first	7.16667	0.0350163
I	2834250	2834271	2834262	+	SPAC3F10.09	utr3	middle	180.5	0.881922
I	2834752	2834759	2834752	+	SPAC3F10.09	utr3	middle	10.3333	0.0504886
I	2834903	2834915	2834903	+	SPAC3F10.09	utr3	last	24.1667	0.118078
I	2846310	2846315	2846310	+	SPAC3F10.13	utr5	utr5	31	1.41985
I	2846350	2846373	2846368	+	SPAC3F10.13	utr5	utr5	32.3333	1.48092
I	2846455	2846463	2846461	+	SPAC3F10.13	utr5	utr5	9.5	0.435115
I	2847495	2847497	2847495	+	SPAC3F10.13	coding_exon	CDS	5.5	0.251908
I	2848439	2848458	2848439	+	SPAC3F10.13	utr3	first	12.8333	0.587786
I	2848475	2848480	2848478	+	SPAC3F10.13	utr3	middle	6	0.274809
I	2848546	2848558	2848550	+	SPAC3F10.13	utr3	last	9	0.412214
I	2853454	2853470	2853464	+	SPAC3F10.17	utr3	first	45	0.810811
I	2853643	2853656	2853645	+	SPAC3F10.17	utr3	middle	10.5	0.189189
I	2853656	2853676	2853661	+	SPAC3F10.17	utr3_extended	last	5	0.0900901
I	2858185	2858189	2858186	+	SPAC8F11.03	coding_exon	CDS	5.33333	NA
I	2860778	2860807	2860793	+	SPAC8F11.04	utr3	first	219.9	0.208644
I	2860807	2860833	2860820	+	SPAC8F11.04	utr3	last	834.05	0.791356
I	2863784	2863795	2863784	+	SPAC8F11.06	utr3	single	6.66667	1
I	2880372	2880408	2880390	+	SPACUNK4.16c	utr3	first	57.5	0.741935
I	2880575	2880601	2880588	+	SPACUNK4.16c	utr3	last	20	0.258065
I	2886750	2886767	2886764	+	SPACUNK4.13c	utr3	first	9.16667	0.116525
I	2886767	2886794	2886778	+	SPACUNK4.13c	utr3	last	69.5	0.883475
I	2887670	2887693	2887676	+	SPACUNK4.12c	coding_exon	CDS	7	0.0787992
I	2889981	2890002	2889999	+	SPACUNK4.12c	utr3	first	24.6667	0.277674
I	2890133	2890150	2890139	+	SPACUNK4.12c	utr3_extended	last	64.1667	0.722326
I	2890878	2890903	2890882	+	SPACUNK4.11c	utr3	single	36.3333	1
I	2893774	2893775	2893774	+	SPACUNK4.20	utr3	single	7	1
I	2901842	2901859	2901848	+	SPACUNK4.07c	utr3	first	10.3333	0.25
I	2901859	2901877	2901869	+	SPACUNK4.07c	utr3	middle	6.83333	0.165323
I	2901898	2901913	2901902	+	SPACUNK4.07c	utr3	last	31	0.75
I	2902720	2902722	2902720	+	SPACUNK4.06c	coding_exon	CDS	13	0.0697674
I	2902898	2902917	2902898	+	SPACUNK4.06c	utr3	first	26.8333	0.144007
I	2902936	2902953	2902950	+	SPACUNK4.06c	utr3	middle	24.6667	0.132379
I	2903165	2903176	2903168	+	SPACUNK4.06c	utr3_extended	middle	127.167	0.682469
I	2903187	2903212	2903192	+	SPACUNK4.06c	utr3_extended	middle	59.1667	0.317531
I	2903250	2903261	2903250	+	SPACUNK4.06c	utr3_extended	middle	23.25	0.124776
I	2903261	2903282	2903265	+	SPACUNK4.06c	utr3_extended	last	13.5833	0.072898
I	2912536	2912543	2912536	+	SPAC513.02	utr3	single	6.66667	1
I	2917821	2917829	2917821	+	SPAC513.05	coding_exon	CDS	26	NA
I	2919746	2919749	2919747	+	SPAC513.05	utr3	single	6	1
I	2922599	2922623	2922602	+	SPAC513.07	utr3	first	19.1667	0.17896
I	2922678	2922680	2922678	+	SPAC513.07	utr3	middle	6.5	0.0606909
I	2922708	2922736	2922723	+	SPAC513.07	utr3	middle	87.9333	0.82104
I	2922736	2922749	2922748	+	SPAC513.07	utr3	middle	5	0.0466853
I	2922791	2922811	2922805	+	SPAC513.07	utr3	middle	19.1667	0.17896
I	2922829	2922837	2922829	+	SPAC513.07	utr3_extended	last	5.5	0.0513539
I	2924669	2924689	2924678	+	SPAC2E1P3.01	utr3	single	5.91667	1
I	2932235	2932246	2932237	+	SPAC2E1P3.04	utr5	utr5	9.33333	0.0475584
I	2932652	2932658	2932653	+	SPAC2E1P3.04	utr5	utr5	10.3333	0.0526539
I	2935086	2935100	2935092	+	SPAC2E1P3.04	utr3	first	19	0.0968153
I	2935100	2935115	2935111	+	SPAC2E1P3.04	utr3	last	177.25	0.903185
I	2946112	2946118	2946114	+	SPAPB2C8.01	utr3	first	7.25	0.0212423
I	2946146	2946169	2946158	+	SPAPB2C8.01	utr3	middle	293.5	0.859947
I	2946169	2946182	2946172	+	SPAPB2C8.01	utr3	last	47.8	0.140053
I	2949812	2949832	2949830	+	SPAPB24D3.01	utr3	first	5.83333	0.402299
I	2950013	2950030	2950015	+	SPAPB24D3.01	utr3	last	8.66667	0.597701
I	2953681	2953698	2953688	+	SPAPB24D3.03	utr3	single	85	1
I	2990489	2990503	2990499	+	SPAC31G5.01	utr3	first	43.25	0.685601
I	2990625	2990629	2990625	+	SPAC31G5.01	utr3	middle	5	0.0792602
I	2990712	2990741	2990732	+	SPAC31G5.01	utr3	last	19.8333	0.314399
I	2992133	2992144	2992140	+	SPAC31G5.02	utr3	first	36.5	0.834286
I	2992216	2992234	2992226	+	SPAC31G5.02	utr3	last	7.25	0.165714
I	2993117	2993133	2993130	+	SPAC31G5.03	utr3	first	9.4	0.0205847
I	2993133	2993162	2993149	+	SPAC31G5.03	utr3	middle	398.15	0.871893
I	2993162	2993179	2993165	+	SPAC31G5.03	utr3	last	58.5	0.128107
I	2994777	2994803	2994788	+	SPAC31G5.04	utr3	single	180	1
I	2999473	2999486	2999479	+	SPAC31G5.08	coding_exon	CDS	47.75	NA
I	3000154	3000163	3000160	+	SPAC31G5.08	utr3	single	60	1
I	3010584	3010603	3010590	+	SPAC31G5.21	utr3	single	62.8333	1
I	3012231	3012250	3012235	+	SPAC31G5.13	utr3	first	34.4167	0.774859
I	3012390	3012403	3012396	+	SPAC31G5.13	utr3_extended	last	10	0.225141
I	3013770	3013772	3013770	+	SPAC31G5.14	utr3	first	9.5	0.154054
I	3013975	3013986	3013975	+	SPAC31G5.14	utr3	middle	31	0.502703
I	3013986	3013998	3013986	+	SPAC31G5.14	utr3	middle	7.5	0.121622
I	3014176	3014199	3014180	+	SPAC31G5.14	utr3	last	30.6667	0.497297
I	3016350	3016364	3016353	+	SPAC31G5.15	coding_exon	CDS	7	NA
I	3026345	3026347	3026345	+	SPAC31G5.19	coding_exon	CDS	7	0.0246479
I	3028010	3028034	3028021	+	SPAC31G5.19	utr3	first	275.5	0.97007
I	3028034	3028064	3028046	+	SPAC31G5.19	utr3	middle	7.08333	0.0249413
I	3028088	3028095	3028092	+	SPAC31G5.19	utr3	last	8.5	0.0299296
I	3034884	3034886	3034884	+	SPAC1786.02	coding_exon	CDS	8.5	0.0250984
I	3037145	3037160	3037149	+	SPAC1786.02	utr3	first	319	0.941929
I	3037242	3037249	3037244	+	SPAC1786.02	utr3	last	19.6667	0.0580709
I	3039007	3039028	3039008	+	SPAC1786.03	coding_exon	CDS	16.5	NA
I	3042604	3042625	3042611	+	SPAC24C9.03	utr3	first	168	0.437215
I	3042652	3042665	3042654	+	SPAC24C9.03	utr3	middle	51.0667	0.1329
I	3042736	3042745	3042737	+	SPAC24C9.03	utr3	middle	31.1333	0.0810236
I	3042771	3042789	3042776	+	SPAC24C9.03	utr3	middle	20	0.0520494
I	3042789	3042813	3042802	+	SPAC24C9.03	utr3	middle	216.25	0.562785
I	3042813	3042828	3042813	+	SPAC24C9.03	utr3	last	28.25	0.0735198
I	3044854	3044873	3044872	+	SPAC24C9.04	utr3	first	5.4	0.298893
I	3044873	3044895	3044883	+	SPAC24C9.04	utr3	middle	12.6667	0.701107
I	3044944	3044951	3044948	+	SPAC24C9.04	utr3	middle	5	0.276753
I	3045047	3045060	3045047	+	SPAC24C9.04	utr3	middle	5.33333	0.295203
I	3045060	3045080	3045061	+	SPAC24C9.04	utr3	last	5.25	0.29059
I	3063453	3063464	3063453	+	SPAC24C9.08	utr3	first	13.5	0.421875
I	3063494	3063531	3063513	+	SPAC24C9.08	utr3	last	18.5	0.578125
I	3069147	3069178	3069158	+	SPAC24C9.11	utr3_extended	single	175.5	1
I	3074533	3074541	3074534	+	SPAC24C9.14	utr3	first	38.5	0.738019
I	3074690	3074697	3074695	+	SPAC24C9.14	utr3	middle	10	0.191693
I	3074711	3074724	3074722	+	SPAC24C9.14	utr3	middle	9.5	0.182109
I	3074771	3074779	3074772	+	SPAC24C9.14	utr3	middle	13.6667	0.261981
I	3074790	3074811	3074809	+	SPAC24C9.14	utr3	middle	9.16667	0.175719
I	3077395	3077407	3077398	+	SPAC24C9.14	utr3_extended	last	7	0.134185
I	3080402	3080414	3080409	+	SPAC16A10.01	utr3	single	19.5	1
I	3081561	3081565	3081561	+	SPAC16A10.02	utr3	first	5.5	0.0345912
I	3082277	3082293	3082289	+	SPAC16A10.02	utr3	last	153.5	0.965409
I	3101162	3101175	3101172	+	SPAC589.04	utr3	single	29.3333	1
I	3108312	3108330	3108316	+	SPAC589.09	utr3	single	11	1
I	3110357	3110369	3110363	+	SPAC589.12	intron	intron	5.16667	NA
I	3111579	3111581	3111579	+	SPAC589.12	coding_exon	CDS	6.5	NA
I	3113448	3113462	3113456	+	SPAC589.12	utr3_extended	single	9.83333	1
I	3129374	3129400	3129380	+	SPAC688.09	utr3	first	13.9444	0.690509
I	3129524	3129530	3129526	+	SPAC688.09	utr3_extended	last	6.25	0.309491
I	3130351	3130362	3130354	+	SPAC688.10	coding_exon	CDS	9.33333	NA
I	3130909	3130913	3130909	+	SPAC688.10	coding_exon	CDS	5.75	NA
I	3138451	3138469	3138454	+	SPAC688.11	utr3	first	14.3333	0.332046
I	3138554	3138564	3138559	+	SPAC688.11	utr3	middle	15.1667	0.351351
I	3138604	3138628	3138616	+	SPAC688.11	utr3	last	28	0.648649
I	3143179	3143184	3143181	+	SPAC688.14	utr3	single	50	1
I	3144400	3144417	3144405	+	SPAC688.16	utr3	single	245.333	1
I	3152305	3152317	3152305	+	SPAC3G9.13c	intron	intron	11.5333	NA
I	3152870	3152873	3152870	+	SPAC3G9.13c	utr3	single	5.33333	1
I	3164181	3164205	3164191	+	SPAC3G9.10c	utr3	first	6.66667	0.43956
I	3164278	3164280	3164278	+	SPAC3G9.10c	utr3	middle	5.5	0.362637
I	3164506	3164520	3164516	+	SPAC3G9.10c	utr3_extended	last	8.5	0.56044
I	3167564	3167595	3167582	+	SPAC3G9.09c	utr3	first	4126.17	0.898067
I	3167655	3167687	3167675	+	SPAC3G9.09c	utr3	middle	93.9286	0.0204437
I	3167687	3167705	3167698	+	SPAC3G9.09c	utr3	last	468.333	0.101933
I	3171436	3171445	3171441	+	SPAC3G9.07c	utr3	single	32.5	1
I	3186450	3186474	3186456	+	SPAC1486.01	utr3	first	26.25	0.518946
I	3186501	3186528	3186516	+	SPAC1486.01	utr3	middle	24.3333	0.481054
I	3186565	3186571	3186569	+	SPAC1486.01	utr3	last	7.5	0.14827
I	3201416	3201418	3201416	+	SPAC1486.05	coding_exon	CDS	5	NA
I	3202441	3202464	3202448	+	SPAC1486.05	coding_exon	CDS	17.5	NA
I	3205297	3205305	3205297	+	SPAC1486.06	coding_exon	CDS	9.9	0.109756
I	3205646	3205653	3205649	+	SPAC1486.06	utr3	first	55.5	0.615299
I	3205691	3205709	3205708	+	SPAC1486.06	utr3	middle	15	0.166297
I	3205741	3205754	3205750	+	SPAC1486.06	utr3	middle	34.7	0.384701
I	3205800	3205828	3205820	+	SPAC1486.06	utr3	last	7.83333	0.0868441
I	3208133	3208160	3208146	+	SPAC1486.08	utr3	first	256.667	0.608696
I	3208173	3208187	3208175	+	SPAC1486.08	utr3	middle	165	0.391304
I	3208606	3208631	3208626	+	SPAC1486.08	utr3	last	14.8333	0.0351779
I	3211466	3211491	3211474	+	SPAC1486.09	utr3	first	118.833	0.955764
I	3211525	3211532	3211528	+	SPAC1486.09	utr3	last	5.5	0.0442359
I	3214384	3214402	3214384	+	SPAC1486.10	utr3	first	11.5	0.305445
I	3214453	3214476	3214464	+	SPAC1486.10	utr3	last	26.15	0.694555
I	3231067	3231089	3231083	+	SPAC6G10.07	utr3	single	65.6667	1
I	3232907	3232918	3232915	+	SPAC6G10.08	utr3	first	8	0.0172774
I	3232918	3232950	3232929	+	SPAC6G10.08	utr3	middle	116.7	0.252034
I	3232950	3232982	3232970	+	SPAC6G10.08	utr3	middle	346.333	0.747966
I	3232982	3233005	3232986	+	SPAC6G10.08	utr3_extended	middle	15.6667	0.0338349
I	3233191	3233195	3233191	+	SPAC6G10.08	utr3_extended	last	12.5	0.0269959
I	3236164	3236178	3236173	+	SPAC6G10.09	utr3	first	17	0.62963
I	3236231	3236242	3236238	+	SPAC6G10.09	utr3	last	10	0.37037
I	3247940	3247956	3247954	+	SPAC6G9.04	utr5	utr5	7.83333	NA
I	3252694	3252720	3252714	+	SPAC6G9.04	utr3	single	195	1
I	3254423	3254434	3254428	+	SPAC6G9.05	utr3	single	18	1
I	3261130	3261154	3261149	+	SPAC6G9.08	utr3	first	8.7	0.142623
I	3261199	3261215	3261205	+	SPAC6G9.08	utr3	middle	23.3333	0.382514
I	3261232	3261243	3261232	+	SPAC6G9.08	utr3	middle	37.6667	0.617486
I	3261280	3261287	3261280	+	SPAC6G9.08	utr3	middle	7	0.114754
I	3261348	3261371	3261363	+	SPAC6G9.08	utr3	last	10.5	0.172131
I	3269210	3269226	3269213	+	SPAC6G9.11	utr3	first	115	0.824373
I	3269296	3269300	3269296	+	SPAC6G9.11	utr3	middle	24.5	0.175627
I	3269324	3269340	3269324	+	SPAC6G9.11	utr3	middle	20.6667	0.148148
I	3269373	3269377	3269375	+	SPAC6G9.11	utr3	middle	12	0.0860215
I	3269388	3269395	3269388	+	SPAC6G9.11	utr3	middle	7.83333	0.0561529
I	3269439	3269457	3269454	+	SPAC6G9.11	utr3	middle	17.7619	0.127325
I	3269562	3269576	3269562	+	SPAC6G9.11	utr3	middle	13	0.09319
I	3269666	3269679	3269677	+	SPAC6G9.11	utr3_extended	last	6.83333	0.0489845
I	3272104	3272131	3272120	+	SPAC6G9.12	utr3	first	187.5	0.951777
I	3272131	3272148	3272137	+	SPAC6G9.12	utr3	middle	9.5	0.0482234
I	3272330	3272345	3272341	+	SPAC6G9.12	utr3	last	9.5	0.0482234
I	3276514	3276533	3276523	+	SPAC6G9.14	utr3	single	38.9	1
I	3282056	3282062	3282056	+	SPAC652.01	utr3	single	7	1
I	3288470	3288482	3288471	+	SPAPB1E7.03	utr3	first	132	0.753927
I	3288482	3288499	3288489	+	SPAPB1E7.03	utr3	last	43.0833	0.246073
I	3297368	3297399	3297379	+	SPAPB1E7.05	utr3	first	120.75	0.859431
I	3297399	3297431	3297419	+	SPAPB1E7.05	utr3	middle	19.75	0.140569
I	3297431	3297459	3297443	+	SPAPB1E7.05	utr3	middle	14.4	0.102491
I	3297517	3297524	3297517	+	SPAPB1E7.05	utr3_extended	last	5.5	0.0391459
I	3303242	3303246	3303244	+	SPAPB1E7.07	utr5	utr5	5	0.0273748
I	3310276	3310286	3310282	+	SPAPB1E7.07	utr3	first	13.9	0.0761018
I	3310364	3310383	3310373	+	SPAPB1E7.07	utr3_extended	last	168.75	0.923898
I	3315887	3315916	3315907	+	SPAPB1E7.09	utr3_extended	first	1938	0.972322
I	3315982	3316018	3315998	+	SPAPB1E7.09	utr3_extended	last	55.1667	0.0276779
I	3317168	3317180	3317170	+	SPAPB1E7.10	coding_exon	CDS	15.1	0.0754057
I	3317420	3317427	3317426	+	SPAPB1E7.10	utr3	first	19.75	0.0986267
I	3317547	3317572	3317570	+	SPAPB1E7.10	utr3_extended	middle	7.66667	0.0382855
I	3317572	3317603	3317584	+	SPAPB1E7.10	utr3_extended	middle	16.5167	0.0824802
I	3317615	3317629	3317619	+	SPAPB1E7.10	utr3_extended	last	180.5	0.901373
I	3319988	3320009	3319998	+	SPAPB1E7.12	utr3	first	25.5	0.0256949
I	3320024	3320036	3320028	+	SPAPB1E7.12	utr3	middle	395.917	0.398942
I	3320036	3320061	3320046	+	SPAPB1E7.12	utr3	last	596.5	0.601058
I	3322574	3322585	3322579	+	SPAPB1E7.14	utr3	first	19.5	0.522321
I	3323177	3323188	3323177	+	SPAPB1E7.14	utr3	middle	13	0.348214
I	3323595	3323617	3323604	+	SPAPB1E7.14	utr3	middle	9.16667	0.245536
I	3323617	3323634	3323630	+	SPAPB1E7.14	utr3	last	17.8333	0.477679
I	3327819	3327828	3327826	+	SPAC2E1P5.03	utr3	first	7.5	0.0660793
I	3327842	3327847	3327842	+	SPAC2E1P5.03	utr3	middle	9.5	0.0837004
I	3327871	3327890	3327882	+	SPAC2E1P5.03	utr3	middle	37.8333	0.333333
I	3327909	3327928	3327915	+	SPAC2E1P5.03	utr3	middle	62.6667	0.552129
I	3327928	3327957	3327933	+	SPAC2E1P5.03	utr3	middle	50.8333	0.447871
I	3327957	3327983	3327973	+	SPAC2E1P5.03	utr3	middle	22.75	0.200441
I	3328915	3328927	3328915	+	SPAC2E1P5.03	utr3	last	5.33333	0.0469897
I	3334464	3334480	3334469	+	SPAC26A3.01	utr3	first	27.5	0.428254
I	3334480	3334491	3334480	+	SPAC26A3.01	utr3	middle	10	0.155729
I	3334508	3334514	3334509	+	SPAC26A3.01	utr3	middle	6.4	0.0996663
I	3334537	3334561	3334547	+	SPAC26A3.01	utr3	middle	36.7143	0.571746
I	3334628	3334631	3334629	+	SPAC26A3.01	utr3	middle	8.5	0.132369
I	3334709	3334712	3334710	+	SPAC26A3.01	utr3	last	5.5	0.0856507
I	3336966	3336977	3336966	+	SPAC26A3.02	utr3	first	28.8333	0.717842
I	3338162	3338167	3338166	+	SPAC26A3.02	utr3_extended	last	11.3333	0.282158
I	3338321	3338355	3338341	+	SPAC26A3.04	utr3	single	3117.7	1
I	3344279	3344290	3344283	+	SPAC26A3.05	utr3	first	8.66667	0.512315
I	3344359	3344373	3344362	+	SPAC26A3.05	utr3	last	8.25	0.487685
I	3345812	3345826	3345815	+	SPAC26A3.06	utr3	single	71	1
I	3347636	3347649	3347647	+	SPAC26A3.08	utr3	first	10.5	0.5
I	3348136	3348145	3348136	+	SPAC26A3.08	utr3	last	10.5	0.5
I	3354061	3354079	3354064	+	SPAC26A3.10	coding_exon	CDS	19.1667	NA
I	3356249	3356263	3356250	+	SPAC26A3.10	utr3	single	31.8333	1
I	3357783	3357800	3357789	+	SPAC26A3.11	utr3	first	19.6667	0.121088
I	3357848	3357859	3357852	+	SPAC26A3.11	utr3	middle	74	0.455618
I	3357859	3357882	3357870	+	SPAC26A3.11	utr3	last	88.4167	0.544382
I	3370929	3370935	3370932	+	SPAC26A3.16	utr3	first	28.3333	0.345178
I	3371167	3371180	3371168	+	SPAC26A3.16	utr3	middle	53.75	0.654822
I	3371180	3371205	3371181	+	SPAC26A3.16	utr3	middle	26.6667	0.324873
I	3371228	3371246	3371233	+	SPAC26A3.16	utr3	middle	16.5333	0.201421
I	3371382	3371397	3371382	+	SPAC26A3.16	utr3	last	21.3333	0.259898
I	3377901	3377923	3377912	+	SPAC8E11.07c	utr3	first	15.8333	0.0981405
I	3377972	3377983	3377972	+	SPAC8E11.07c	utr3	middle	6.75	0.0418388
I	3378012	3378026	3378014	+	SPAC8E11.07c	utr3	middle	145.5	0.90186
I	3378059	3378072	3378064	+	SPAC8E11.07c	utr3	last	9.61667	0.0596074
I	3380215	3380227	3380221	+	SPAC8E11.05c	utr3	first	23.3333	0.795455
I	3380326	3380329	3380326	+	SPAC8E11.05c	utr3	last	6	0.204545
I	3381878	3381906	3381888	+	SPAC8E11.04c	utr3	single	73.6667	1
I	3385523	3385552	3385548	+	SPAC8E11.02c	utr3	first	50.881	0.0158286
I	3385552	3385576	3385564	+	SPAC8E11.02c	utr3	middle	1301.83	0.404988
I	3385576	3385590	3385576	+	SPAC8E11.02c	utr3	middle	99.5	0.0309535
I	3385609	3385620	3385619	+	SPAC8E11.02c	utr3	middle	424.5	0.132058
I	3385620	3385645	3385631	+	SPAC8E11.02c	utr3	middle	1912.67	0.595012
I	3385645	3385662	3385658	+	SPAC8E11.02c	utr3	last	87.75	0.0272982
I	3387847	3387852	3387850	+	SPAC8E11.01c	utr3	first	5.5	0.119565
I	3387934	3387943	3387940	+	SPAC8E11.01c	utr3	last	40.5	0.880435
I	3389484	3389493	3389490	+	SPAC959.02	utr3	first	14.5	0.274448
I	3389584	3389594	3389584	+	SPAC959.02	utr3	middle	5.66667	0.107256
I	3389686	3389722	3389704	+	SPAC959.02	utr3	last	38.3333	0.725552
I	3400098	3400109	3400098	+	SPAC959.07	utr3	first	123.7	0.426258
I	3400109	3400131	3400125	+	SPAC959.07	utr3	middle	7.16667	0.0246956
I	3400131	3400153	3400143	+	SPAC959.07	utr3	last	166.5	0.573742
I	3401038	3401065	3401050	+	SPAC959.08	utr3	first	1582.33	0.559986
I	3401065	3401091	3401079	+	SPAC959.08	utr3	middle	1243.33	0.440014
I	3401091	3401113	3401102	+	SPAC959.08	utr3	middle	42.25	0.0149522
I	3401113	3401131	3401124	+	SPAC959.08	utr3	last	78.3333	0.0277221
I	3407126	3407143	3407141	+	SPAP32A8.02	utr3	first	19	0.0263237
I	3407545	3407571	3407556	+	SPAP32A8.02	utr3	middle	91.45	0.1267
I	3407571	3407597	3407586	+	SPAP32A8.02	utr3	last	630.333	0.8733
I	3411865	3411888	3411877	+	SPAC3H5.12c	utr3	single	3059.25	1
I	3429200	3429225	3429219	+	SPAC3H5.08c	utr3	first	39.5	0.837456
I	3429322	3429340	3429328	+	SPAC3H5.08c	utr3	last	7.66667	0.162544
I	3436073	3436103	3436082	+	SPAC3H5.06c	utr3	single	18.6667	1
I	3436816	3436828	3436822	+	SPAC3H5.05c	utr3	single	1872.67	1
I	3445649	3445656	3445649	+	SPAC3A11.12c	utr3	first	6.66667	0.0188324
I	3445752	3445763	3445752	+	SPAC3A11.12c	utr3	middle	9.66667	0.027307
I	3445971	3445986	3445976	+	SPAC3A11.12c	utr3	middle	6.41667	0.0181262
I	3445986	3446007	3445999	+	SPAC3A11.12c	utr3	middle	10.6667	0.0301318
I	3446007	3446034	3446018	+	SPAC3A11.12c	utr3_extended	middle	343.333	0.969868
I	3446090	3446100	3446090	+	SPAC3A11.12c	utr3_extended	last	7.66667	0.0216573
I	3447899	3447915	3447913	+	SPAC3A11.11c	utr3	first	5	0.151515
I	3448025	3448029	3448027	+	SPAC3A11.11c	utr3	last	28	0.848485
I	3449802	3449811	3449804	+	SPAC3A11.10c	utr3	single	141	1
I	3454961	3454981	3454965	+	SPAC3A11.08	coding_exon	CDS	96.3333	8.37681
I	3454981	3455004	3454996	+	SPAC3A11.08	coding_exon	CDS	18.25	1.58696
I	3455248	3455260	3455253	+	SPAC3A11.08	coding_exon	CDS	41.5	3.6087
I	3455280	3455294	3455280	+	SPAC3A11.08	utr3	first	5.66667	0.492754
I	3455294	3455311	3455307	+	SPAC3A11.08	utr3	last	5.83333	0.507246
I	3459061	3459074	3459063	+	SPAC3A11.07	utr3	first	141.917	0.93111
I	3459384	3459393	3459384	+	SPAC3A11.07	utr3_extended	last	10.5	0.0688901
I	3465263	3465283	3465273	+	SPAC3A11.05c	utr3	single	23.5	1
I	3467681	3467690	3467681	+	SPAC3A11.03	coding_exon	CDS	8.5	0.0846895
I	3467915	3467933	3467925	+	SPAC3A11.03	utr3	first	95.2	0.948522
I	3468486	3468491	3468488	+	SPAC3A11.03	utr3	last	5.16667	0.0514779
I	3477338	3477352	3477348	+	SPAC328.02	utr3	first	13.5	0.54
I	3477504	3477508	3477506	+	SPAC328.02	utr3	middle	9	0.36
I	3478918	3478924	3478920	+	SPAC328.02	utr3	last	11.5	0.46
I	3480412	3480421	3480412	+	SPAC328.03	coding_exon	CDS	171.7	0.38541
I	3480808	3480828	3480815	+	SPAC328.03	coding_exon	CDS	7.5	0.016835
I	3480963	3480967	3480965	+	SPAC328.03	utr3	first	13.5	0.030303
I	3481058	3481092	3481072	+	SPAC328.03	utr3	middle	421.833	0.946876
I	3481166	3481173	3481169	+	SPAC328.03	utr3	middle	18	0.040404
I	3481185	3481188	3481185	+	SPAC328.03	utr3	middle	9.33333	0.0209502
I	3481243	3481255	3481249	+	SPAC328.03	utr3	middle	23.6667	0.0531238
I	3481285	3481312	3481299	+	SPAC328.03	utr3	last	23.6667	0.0531238
I	3484531	3484547	3484540	+	SPAC328.04	utr3	single	7.5	1
I	3486909	3486918	3486915	+	SPAC328.05	utr3	single	101.5	1
I	3491018	3491040	3491029	+	SPAC328.06	utr3	single	6	1
I	3496373	3496390	3496388	+	SPAC328.09	utr3	first	19.5	0.0626674
I	3496434	3496458	3496443	+	SPAC328.09	utr3	last	291.667	0.937333
I	3503658	3503670	3503660	+	SPAC16E8.01	utr3	first	11.8333	0.182519
I	3503908	3503924	3503913	+	SPAC16E8.01	utr3	last	53	0.817481
I	3505610	3505614	3505610	+	SPAC16E8.03	utr3	first	43	0.86
I	3505986	3505992	3505990	+	SPAC16E8.03	utr3_extended	last	7	0.14
I	3515259	3515272	3515259	+	SPAC16E8.08	utr3	first	5.1	0.163987
I	3515391	3515393	3515391	+	SPAC16E8.08	utr3	last	26	0.836013
I	3518593	3518604	3518597	+	SPAC16E8.09	utr3	single	5.5	1
I	3527030	3527039	3527032	+	SPAC16E8.13	utr3	single	8	1
I	3529038	3529049	3529040	+	SPAC16E8.15	utr3	first	7.86667	0.0103215
I	3529116	3529130	3529124	+	SPAC16E8.15	utr3	middle	45	0.0590422
I	3529130	3529152	3529140	+	SPAC16E8.15	utr3	middle	210.5	0.276186
I	3529152	3529182	3529164	+	SPAC16E8.15	utr3	middle	41.0417	0.0538487
I	3529182	3529209	3529199	+	SPAC16E8.15	utr3	middle	78.3333	0.102777
I	3529220	3529246	3529228	+	SPAC16E8.15	utr3	middle	74.9286	0.09831
I	3529439	3529455	3529446	+	SPAC16E8.15	utr3_extended	last	551.667	0.723814
I	3531720	3531732	3531720	+	SPAC16E8.16	utr3	single	12.5	1
I	3538601	3538613	3538610	+	SPAC1B1.01	utr3	single	85.5	1
I	3551896	3551898	3551896	+	SPAC17A2.01	utr3	single	7	1
I	3562897	3562920	3562903	+	SPAC17A2.05	utr3	single	20.1667	1
I	3582948	3582972	3582958	+	SPAC17A2.12	utr3	single	10	1
I	3588517	3588534	3588524	+	SPAC17A2.14	utr3	first	9.16667	0.366667
I	3588635	3588652	3588639	+	SPAC17A2.14	utr3	middle	6.11667	0.244667
I	3588652	3588668	3588664	+	SPAC17A2.14	utr3	middle	5	0.2
I	3588756	3588769	3588758	+	SPAC17A2.14	utr3	last	15.8333	0.633333
I	3591421	3591435	3591424	+	SPAC17G6.03	utr5	utr5	23	NA
I	3591435	3591448	3591435	+	SPAC17G6.03	utr5	utr5	11	NA
I	3591459	3591467	3591460	+	SPAC17G6.03	utr5	utr5	20.9	NA
I	3591986	3591999	3591987	+	SPAC17G6.03	utr5	utr5	6.33333	NA
I	3592026	3592035	3592030	+	SPAC17G6.03	utr5	utr5	35	NA
I	3595016	3595032	3595022	+	SPAC17G6.03	utr3	single	5.08333	1
I	3599595	3599611	3599600	+	SPAC17G6.06	utr3	first	258.167	0.021406
I	3599632	3599655	3599643	+	SPAC17G6.06	utr3	middle	3281	0.272045
I	3599707	3599727	3599709	+	SPAC17G6.06	utr3	middle	927.5	0.0769039
I	3599774	3599800	3599785	+	SPAC17G6.06	utr3_extended	last	8779.5	0.727955
I	3603783	3603800	3603783	+	SPAC17G6.08	utr3	single	6.16667	1
I	3605327	3605345	3605338	+	SPAC17G6.09	utr3	first	20.75	0.513402
I	3605534	3605554	3605540	+	SPAC17G6.09	utr3	last	19.6667	0.486598
I	3607450	3607460	3607452	+	SPAC17G6.10	utr3	single	12.3333	1
I	3616996	3617026	3617013	+	SPAC17G6.13	utr3	first	435.667	0.393378
I	3617026	3617050	3617026	+	SPAC17G6.13	utr3	middle	24.8333	0.0224229
I	3617085	3617113	3617104	+	SPAC17G6.13	utr3_extended	last	671.833	0.606622
I	3625144	3625158	3625147	+	SPAC17G6.17	utr3	first	5.16667	0.0421196
I	3625172	3625189	3625183	+	SPAC17G6.17	utr3	middle	43.3333	0.353261
I	3625189	3625211	3625200	+	SPAC17G6.17	utr3	middle	65.8333	0.536685
I	3625211	3625237	3625219	+	SPAC17G6.17	utr3	last	56.8333	0.463315
I	3627576	3627594	3627586	+	SPAC1142.01	utr3	single	7.75	1
I	3633821	3633837	3633828	+	SPAC1142.04	utr3	first	44.6667	0.501873
I	3633873	3633886	3633873	+	SPAC1142.04	utr3	last	44.3333	0.498127
I	3636348	3636360	3636348	+	SPAC1142.05	utr3	first	9.5	0.0321398
I	3636453	3636471	3636458	+	SPAC1142.05	utr3	middle	68.1667	0.230617
I	3636471	3636494	3636483	+	SPAC1142.05	utr3	middle	222.833	0.753877
I	3636494	3636511	3636505	+	SPAC1142.05	utr3	last	72.75	0.246123
I	3638107	3638109	3638107	+	SPAC1142.06	utr3	first	7.5	0.105386
I	3638375	3638390	3638378	+	SPAC1142.06	utr3	middle	59.1667	0.831382
I	3638390	3638407	3638402	+	SPAC1142.06	utr3_extended	middle	8.06667	0.113349
I	3638418	3638446	3638435	+	SPAC1142.06	utr3_extended	middle	12	0.168618
I	3638556	3638564	3638562	+	SPAC1142.06	utr3_extended	last	6.5	0.0913349
I	3642433	3642452	3642434	+	SPAC1142.08	utr3_extended	single	150	1
I	3644642	3644664	3644646	+	SPAC8C9.03	coding_exon	CDS	25.1667	NA
I	3648422	3648451	3648440	+	SPAC8C9.04	utr3	first	25.1667	0.324034
I	3648532	3648551	3648545	+	SPAC8C9.04	utr3	middle	52.5	0.675966
I	3648893	3648900	3648893	+	SPAC8C9.04	utr3_extended	last	15	0.193133
I	3649518	3649538	3649528	+	SPAC8C9.05	utr5	utr5	26	NA
I	3650098	3650118	3650109	+	SPAC8C9.05	intron	intron	7	NA
I	3650480	3650507	3650499	+	SPAC8C9.05	utr3	single	329.833	1
I	3654843	3654872	3654855	+	SPAC8C9.07	utr3	first	20.8333	0.360231
I	3654872	3654890	3654888	+	SPAC8C9.07	utr3_extended	middle	37	0.639769
I	3654992	3655005	3654992	+	SPAC8C9.07	utr3_extended	last	16	0.276657
I	3656003	3656029	3656008	+	SPAC8C9.08	utr3	first	4886	0.980855
I	3656113	3656137	3656124	+	SPAC8C9.08	utr3	middle	72.65	0.0145844
I	3656163	3656188	3656177	+	SPAC8C9.08	utr3	last	95.3667	0.0191447
I	3659568	3659587	3659583	+	SPAC8C9.11	utr3	first	6.16667	0.0549777
I	3659587	3659611	3659598	+	SPAC8C9.11	utr3	middle	106	0.945022
I	3659970	3659977	3659970	+	SPAC8C9.11	utr3_extended	last	5.5	0.0490342
I	3668756	3668767	3668756	+	SPAC8C9.14	utr3	first	37	0.207865
I	3668970	3668998	3668978	+	SPAC8C9.14	utr3	middle	94	0.52809
I	3669029	3669054	3669043	+	SPAC8C9.14	utr3	middle	84	0.47191
I	3669054	3669075	3669057	+	SPAC8C9.14	utr3	middle	16.1667	0.090824
I	3669075	3669099	3669085	+	SPAC8C9.14	utr3	last	79.25	0.445225
I	3674593	3674609	3674601	+	SPAC15A10.01	utr5	utr5	13	0.577778
I	3675988	3675993	3675988	+	SPAC15A10.01	coding_exon	CDS	7.5	0.333333
I	3677690	3677707	3677703	+	SPAC15A10.01	utr3	first	13	0.577778
I	3677792	3677801	3677794	+	SPAC15A10.01	utr3	last	9.5	0.422222
I	3679464	3679466	3679464	+	SPAC15A10.02	utr3	first	19.5	0.447419
I	3679926	3679956	3679942	+	SPAC15A10.02	utr3	middle	24.0833	0.552581
I	3679989	3680011	3680000	+	SPAC15A10.02	utr3	last	9.91667	0.227533
I	3688467	3688488	3688482	+	SPAC15A10.06	utr5	utr5	150.5	NA
I	3692418	3692433	3692418	+	SPAC15A10.07	utr3	first	11.8333	0.68932
I	3692476	3692484	3692481	+	SPAC15A10.07	utr3	last	5.33333	0.31068
I	3694977	3694995	3694977	+	SPAC15A10.08	utr3	single	57.15	1
I	3708996	3709027	3709015	+	SPAC15A10.11	utr3	first	287	0.426925
I	3709027	3709055	3709038	+	SPAC15A10.11	utr3	middle	385.25	0.573075
I	3709055	3709087	3709072	+	SPAC15A10.11	utr3	middle	16.5	0.0245444
I	3709087	3709104	3709102	+	SPAC15A10.11	utr3	last	17.75	0.0264039
I	3713918	3713927	3713918	+	SPAC15A10.13	utr3	single	7.5	1
I	3716408	3716421	3716409	+	SPAC15A10.15	utr3	first	38	0.638655
I	3716421	3716435	3716423	+	SPAC15A10.15	utr3	middle	21.5	0.361345
I	3716449	3716457	3716449	+	SPAC15A10.15	utr3	middle	12.5	0.210084
I	3716526	3716545	3716530	+	SPAC15A10.15	utr3	last	14.8	0.248739
I	3723041	3723071	3723054	+	SPAC15E1.03	utr3	single	19437	1
I	3725711	3725730	3725714	+	SPAC15E1.04	utr3	single	11	1
I	3728116	3728136	3728131	+	SPAC15E1.06	utr3	first	63.1667	0.826609
I	3728187	3728203	3728190	+	SPAC15E1.06	utr3	middle	12.8333	0.167939
I	3728409	3728419	3728409	+	SPAC15E1.06	utr3	last	13.25	0.173391
I	3731006	3731017	3731006	+	SPAC15E1.08	utr3	first	683.333	0.961538
I	3731017	3731029	3731017	+	SPAC15E1.08	utr3_extended	last	27.3333	0.0384615
I	3732253	3732264	3732253	+	SPAC15E1.09	utr3	single	59.8333	1
I	3733320	3733336	3733320	+	SPAC15E1.10	utr3	single	5.83333	1
I	3739181	3739193	3739190	+	SPAP7G5.03	utr3	single	50.5	1
I	3744850	3744870	3744859	+	SPAP7G5.05	utr3	single	3970.25	1
I	3751609	3751617	3751615	+	SPAP7G5.06	utr3	first	8.5	0.566667
I	3751726	3751734	3751726	+	SPAP7G5.06	utr3	last	6.5	0.433333
I	3791694	3791707	3791700	+	SPAP4C9.02	utr3	single	58	1
I	3800834	3800845	3800834	+	SPAC1556.03	utr3	first	8.5	0.181495
I	3801158	3801169	3801161	+	SPAC1556.03	utr3	middle	36.8333	0.786477
I	3801348	3801349	3801348	+	SPAC1556.03	utr3	last	10	0.213523
I	3806937	3806958	3806947	+	SPAC1556.07	utr3	first	152.333	0.10185
I	3806958	3806980	3806968	+	SPAC1556.07	utr3	middle	1009.67	0.675061
I	3806980	3807005	3806991	+	SPAC1556.07	utr3_extended	middle	486	0.324939
I	3807126	3807147	3807136	+	SPAC1556.07	utr3_extended	middle	112.167	0.0749944
I	3807191	3807205	3807195	+	SPAC1556.07	utr3_extended	middle	206.667	0.138177
I	3807231	3807248	3807242	+	SPAC1556.07	utr3_extended	last	75	0.0501449
I	3812984	3812988	3812986	+	SPAC1F12.05	utr5	utr5	15	NA
I	3814485	3814515	3814494	+	SPAC1F12.05	utr3	single	47.5	1
I	3817077	3817103	3817091	+	SPAC1F12.07	utr3	first	982.5	0.79186
I	3817103	3817118	3817104	+	SPAC1F12.07	utr3	last	258.25	0.20814
I	3818554	3818568	3818561	+	SPAC1F12.08	utr3	single	20.5	1
I	3820455	3820483	3820476	+	SPAC1F12.09	utr3	first	5.01667	0.0285443
I	3820483	3820504	3820493	+	SPAC1F12.09	utr3	middle	109.25	0.621622
I	3820504	3820527	3820515	+	SPAC1F12.09	utr3	last	66.5	0.378378
I	3824441	3824461	3824446	+	SPAC4H3.01	utr3	single	80	1
I	3835606	3835616	3835614	+	SPAC4H3.05	utr3	first	7.5	0.0806452
I	3835730	3835745	3835739	+	SPAC4H3.05	utr3	middle	85	0.913978
I	3835758	3835763	3835758	+	SPAC4H3.05	utr3_extended	last	8	0.0860215
I	3838379	3838397	3838379	+	SPAC4H3.06	utr3	first	8	0.224299
I	3838397	3838422	3838414	+	SPAC4H3.06	utr3	middle	5.23333	0.146729
I	3838422	3838442	3838429	+	SPAC4H3.06	utr3	middle	24.6667	0.691589
I	3838456	3838471	3838468	+	SPAC4H3.06	utr3	middle	5.33333	0.149533
I	3839585	3839607	3839592	+	SPAC4H3.06	utr3	last	11	0.308411
I	3842945	3842950	3842949	+	SPAC4H3.08	utr3	single	5	1
I	3844111	3844133	3844122	+	SPAC4H3.09	utr3	first	60	0.421053
I	3844154	3844173	3844155	+	SPAC4H3.09	utr3_extended	last	82.5	0.578947
I	3853569	3853591	3853575	+	SPAC4H3.13	utr3_extended	first	118.5	0.916828
I	3853647	3853662	3853651	+	SPAC4H3.13	utr3_extended	last	10.75	0.0831721
I	3861727	3861730	3861728	+	SPAC1071.02	utr3	single	9	1
I	3866044	3866059	3866047	+	SPAC1071.05	utr3	first	10.5	0.0718194
I	3866059	3866080	3866059	+	SPAC1071.05	utr3	middle	9.5	0.0649795
I	3866426	3866450	3866432	+	SPAC1071.05	utr3_extended	middle	123.533	0.844961
I	3866477	3866497	3866484	+	SPAC1071.05	utr3_extended	last	22.6667	0.155039
I	3868287	3868296	3868290	+	SPAC1071.06	utr3	first	7	0.396226
I	3868313	3868342	3868329	+	SPAC1071.06	utr3	last	10.6667	0.603774
I	3869594	3869614	3869602	+	SPAC1071.08	utr3	first	138.667	0.958525
I	3869614	3869627	3869620	+	SPAC1071.08	utr3_extended	last	6	0.0414747
I	3883370	3883386	3883372	+	SPAC1071.11	utr3	first	36.8333	0.653846
I	3883386	3883401	3883399	+	SPAC1071.11	utr3	middle	19.5	0.346154
I	3884118	3884131	3884121	+	SPAC1071.11	utr3	last	6.2	0.110059
I	3886089	3886112	3886107	+	SPAC926.02	utr3	first	38.25	0.818182
I	3886306	3886311	3886309	+	SPAC926.02	utr3	last	8.5	0.181818
I	3888362	3888387	3888380	+	SPAC926.03	utr3	first	107	0.786765
I	3888401	3888423	3888414	+	SPAC926.03	utr3	last	29	0.213235
I	3914666	3914668	3914666	+	SPAC323.04	utr3	first	11	0.0311247
I	3914696	3914700	3914696	+	SPAC323.04	utr3	middle	8.5	0.0240509
I	3914711	3914730	3914715	+	SPAC323.04	utr3	middle	342.417	0.968875
I	3914747	3914766	3914753	+	SPAC323.04	utr3	last	6.86667	0.0194294
I	3923526	3923551	3923541	+	SPAC2F3.01	utr3_extended	single	27.8333	1
I	3925452	3925461	3925452	+	SPAC2F3.02	utr3	first	12	0.344498
I	3925475	3925495	3925475	+	SPAC2F3.02	utr3	middle	21.3333	0.61244
I	3925582	3925592	3925583	+	SPAC2F3.02	utr3	middle	6.5	0.186603
I	3925624	3925631	3925629	+	SPAC2F3.02	utr3	middle	13.5	0.38756
I	3925748	3925756	3925753	+	SPAC2F3.02	utr3	last	5.16667	0.148325
I	3935934	3935943	3935934	+	SPAC2F3.08	utr5	utr5	6.66667	NA
I	3936589	3936599	3936596	+	SPAC2F3.08	coding_exon	CDS	5.33333	NA
I	3941883	3941888	3941885	+	SPAC2F3.09	coding_exon	CDS	26	0.131313
I	3942018	3942034	3942021	+	SPAC2F3.09	utr3	first	169.5	0.856061
I	3942034	3942062	3942046	+	SPAC2F3.09	utr3	middle	11.6667	0.0589226
I	3942062	3942088	3942077	+	SPAC2F3.09	utr3	last	28.5	0.143939
I	3946296	3946305	3946302	+	SPAC2F3.10	utr3	single	5.66667	1
I	3946945	3946961	3946951	+	SPAC2F3.11	coding_exon	CDS	15.8333	NA
I	3947785	3947798	3947790	+	SPAC2F3.11	utr3	single	44.5	1
I	3956843	3956853	3956843	+	SPAC2F3.15	utr3	single	14.3333	1
I	3958629	3958652	3958637	+	SPAC2F3.16	utr3	first	12.75	0.0677591
I	3959296	3959319	3959298	+	SPAC2F3.16	utr3	middle	29	0.154119
I	3959319	3959350	3959339	+	SPAC2F3.16	utr3	middle	159.167	0.845881
I	3959350	3959363	3959355	+	SPAC2F3.16	utr3	last	8	0.0425155
I	3961893	3961909	3961893	+	SPAC11G7.01	utr3	first	8.64286	0.0849421
I	3961921	3961928	3961926	+	SPAC11G7.01	utr3	middle	9.25	0.0909091
I	3961940	3961958	3961941	+	SPAC11G7.01	utr3	middle	27.75	0.272727
I	3962488	3962491	3962489	+	SPAC11G7.01	utr3	middle	39	0.383292
I	3962884	3962902	3962886	+	SPAC11G7.01	utr3	last	62.75	0.616708
I	3966083	3966106	3966086	+	SPAC11G7.02	utr3	first	6.13333	0.0229713
I	3966106	3966137	3966119	+	SPAC11G7.02	utr3	middle	100	0.374532
I	3966149	3966156	3966149	+	SPAC11G7.02	utr3	middle	5.5	0.0205993
I	3966167	3966190	3966175	+	SPAC11G7.02	utr3_extended	last	167	0.625468
I	3968182	3968192	3968188	+	SPAC11G7.03	utr3_extended	single	713.333	1
I	3969410	3969413	3969411	+	SPAC11G7.04	utr3	first	13.5	0.0290052
I	3969476	3969503	3969486	+	SPAC11G7.04	utr3	middle	348	0.74769
I	3969543	3969568	3969556	+	SPAC11G7.04	utr3	last	117.433	0.25231
I	3974741	3974758	3974741	+	SPAPB18E9.01	coding_exon	CDS	6.5	NA
I	3994438	3994461	3994454	+	SPAPB15E9.06	utr3	first	9	0.287234
I	3994478	3994495	3994478	+	SPAPB15E9.06	utr3	last	22.3333	0.712766
I	4003894	4003913	4003909	+	SPAC27E2.01	utr3	first	20.25	0.786408
I	4003929	4003938	4003931	+	SPAC27E2.01	utr3	last	5.5	0.213592
I	4005791	4005795	4005793	+	SPAC27E2.02	utr3_extended	single	8	1
I	4016503	4016510	4016507	+	SPAC27E2.05	utr3	first	7.83333	0.335714
I	4016542	4016559	4016542	+	SPAC27E2.05	utr3	last	15.5	0.664286
I	4021426	4021436	4021430	+	SPAC27E2.07	utr3	first	12.3333	0.0678588
I	4021448	4021461	4021448	+	SPAC27E2.07	utr3	middle	7.5	0.0412655
I	4021524	4021528	4021524	+	SPAC27E2.07	utr3	middle	10	0.0550206
I	4021573	4021597	4021591	+	SPAC27E2.07	utr3	middle	11.5	0.0632737
I	4021597	4021619	4021609	+	SPAC27E2.07	utr3	middle	160.25	0.881706
I	4021670	4021677	4021673	+	SPAC27E2.07	utr3	last	21.5	0.118294
I	4033485	4033494	4033492	+	SPAC27E2.09	coding_exon	CDS	8.33333	NA
I	4033507	4033527	4033512	+	SPAC27E2.09	coding_exon	CDS	5.9	NA
I	4034237	4034262	4034242	+	SPAC27E2.09	utr3	single	6.21667	1
I	4049230	4049239	4049235	+	SPAC19G12.03	utr3	single	5.5	1
I	4050223	4050244	4050233	+	SPAC19G12.04	utr3	first	1000.5	0.845255
I	4050244	4050260	4050244	+	SPAC19G12.04	utr3	last	183.167	0.154745
I	4052176	4052189	4052183	+	SPAC19G12.05	utr3_extended	single	138.5	1
I	4058720	4058731	4058724	+	SPAC19G12.08	utr3	first	296	0.864654
I	4058795	4058815	4058813	+	SPAC19G12.08	utr3	last	46.3333	0.135346
I	4060173	4060176	4060173	+	SPAC19G12.09	utr5	utr5	16.6667	0.291971
I	4061172	4061188	4061177	+	SPAC19G12.09	utr3	first	42.6667	0.747445
I	4061188	4061202	4061191	+	SPAC19G12.09	utr3	last	14.4167	0.252555
I	4068276	4068288	4068281	+	SPAC19G12.11	utr3	first	27.8333	0.515432
I	4068351	4068360	4068358	+	SPAC19G12.11	utr3	middle	9.5	0.175926
I	4068468	4068485	4068468	+	SPAC19G12.11	utr3	last	26.1667	0.484568
I	4069761	4069763	4069761	+	SPAC19G12.12	utr3	first	6.5	0.4875
I	4069866	4069883	4069866	+	SPAC19G12.12	utr3	last	6.83333	0.5125
I	4074387	4074389	4074387	+	SPAC19G12.14	coding_exon	CDS	20.5	0.0671251
I	4074655	4074659	4074656	+	SPAC19G12.14	coding_exon	CDS	6	0.0196464
I	4074770	4074782	4074770	+	SPAC19G12.14	utr3	first	6	0.0196464
I	4074985	4074994	4074989	+	SPAC19G12.14	utr3	middle	279	0.913556
I	4075027	4075043	4075034	+	SPAC19G12.14	utr3	last	26.4	0.086444
I	4084577	4084611	4084593	+	SPAC23A1.03	utr3	single	8232	1
I	4089546	4089551	4089549	+	SPAC23A1.05	utr3	first	47	0.164336
I	4089674	4089702	4089690	+	SPAC23A1.05	utr3	middle	52.5833	0.183858
I	4089702	4089726	4089713	+	SPAC23A1.05	utr3	middle	46.3333	0.162005
I	4089726	4089752	4089739	+	SPAC23A1.05	utr3	middle	206.5	0.722028
I	4089752	4089776	4089765	+	SPAC23A1.05	utr3	middle	79.5	0.277972
I	4089776	4089792	4089779	+	SPAC23A1.05	utr3	last	7.3	0.0255245
I	4094852	4094873	4094864	+	SPAC23A1.09	utr3	single	23.5	1
I	4097993	4098005	4098002	+	SPAC23A1.11	utr3	first	294.8	0.116208
I	4098005	4098026	4098017	+	SPAC23A1.11	utr3	middle	1928	0.760003
I	4098048	4098077	4098058	+	SPAC23A1.11	utr3	middle	608.833	0.239997
I	4098097	4098125	4098114	+	SPAC23A1.11	utr3	last	61	0.0240457
I	4111975	4111994	4111981	+	SPAC23A1.17	utr3	first	122	0.132441
I	4112006	4112031	4112020	+	SPAC23A1.17	utr3	middle	799.167	0.867559
I	4112031	4112059	4112031	+	SPAC23A1.17	utr3	last	42.7	0.0463543
I	4121667	4121674	4121672	+	SPAC26H5.03	utr3	single	55.3333	1
I	4124730	4124737	4124734	+	SPAC26H5.04	utr3	single	5.16667	1
I	4128781	4128795	4128783	+	SPAC26H5.05	utr3	first	39	0.782609
I	4128795	4128809	4128796	+	SPAC26H5.05	utr3	last	10.8333	0.217391
I	4131547	4131554	4131551	+	SPAC26H5.06	utr3	single	8.5	1
I	4144934	4144958	4144955	+	SPAC26H5.11	coding_exon	CDS	7.16667	NA
I	4144958	4144973	4144970	+	SPAC26H5.11	coding_exon	CDS	11.8333	NA
I	4147170	4147183	4147180	+	SPAC26H5.11	utr3	single	169.5	1
I	4149170	4149179	4149175	+	SPAC26H5.12	coding_exon	CDS	35.5	NA
I	4156137	4156162	4156148	+	SPAC25B8.01	utr3	first	416.25	0.533125
I	4156162	4156193	4156176	+	SPAC25B8.01	utr3	last	364.524	0.466875
I	4157661	4157680	4157666	+	SPAC25B8.02	utr3	single	20.8333	1
I	4158343	4158347	4158343	+	SPAC25B8.03	utr5	utr5	11.5	NA
I	4159645	4159658	4159647	+	SPAC25B8.03	coding_exon	CDS	9.33333	NA
I	4160482	4160499	4160486	+	SPAC25B8.03	utr3	single	6.75	1
I	4164203	4164211	4164209	+	SPAC25B8.05	utr3_extended	single	52.8	1
I	4169231	4169239	4169231	+	SPAC25B8.08	coding_exon	CDS	20	NA
I	4170159	4170172	4170165	+	SPAC25B8.08	utr3	single	128	1
I	4171741	4171753	4171751	+	SPAC25B8.09	utr3_extended	first	13.3333	0.296296
I	4171766	4171774	4171766	+	SPAC25B8.09	utr3_extended	middle	6	0.133333
I	4171813	4171826	4171817	+	SPAC25B8.09	utr3_extended	last	31.6667	0.703704
I	4176359	4176379	4176359	+	SPAC25B8.11	utr3	single	17.5833	1
I	4186574	4186576	4186574	+	SPAC25B8.14	utr3	first	6.5	0.177112
I	4186624	4186634	4186627	+	SPAC25B8.14	utr3	middle	30.2	0.822888
I	4186649	4186678	4186669	+	SPAC25B8.14	utr3	last	5.2	0.141689
I	4189909	4189924	4189916	+	SPAC25B8.16	utr3_extended	first	76.75	0.836512
I	4189924	4189944	4189932	+	SPAC25B8.16	utr3_extended	last	15	0.163488
I	4191284	4191289	4191284	+	SPAC25B8.17	utr3	first	6	0.26087
I	4191389	4191412	4191400	+	SPAC25B8.17	utr3	middle	17	0.73913
I	4191412	4191428	4191412	+	SPAC25B8.17	utr3	middle	5.41667	0.235507
I	4191587	4191590	4191587	+	SPAC25B8.17	utr3_extended	last	5.33333	0.231884
I	4191993	4192003	4191993	+	SPAC25B8.18	utr3	first	26.5	0.0599548
I	4192092	4192110	4192100	+	SPAC25B8.18	utr3	last	415.5	0.940045
I	4205491	4205496	4205492	+	SPAC694.02	utr3	first	5.33333	0.222222
I	4205524	4205533	4205527	+	SPAC694.02	utr3	middle	11	0.458333
I	4205590	4205595	4205592	+	SPAC694.02	utr3	last	13	0.541667
I	4206679	4206694	4206691	+	SPAC694.03	utr3	first	20.5	0.7175
I	4207090	4207120	4207105	+	SPAC694.03	utr3	last	8.07143	0.2825
I	4222435	4222440	4222437	+	SPAC1F7.03	utr3	first	87.5	0.945946
I	4223142	4223148	4223145	+	SPAC1F7.03	utr3_extended	last	5	0.0540541
I	4224469	4224489	4224473	+	SPAC1F7.04	intron	intron	143.333	0.75611
I	4225633	4225657	4225646	+	SPAC1F7.04	utr3	first	104.5	0.551257
I	4225657	4225681	4225657	+	SPAC1F7.04	utr3	middle	85.0667	0.448743
I	4225681	4225700	4225693	+	SPAC1F7.04	utr3	middle	12.3333	0.0650607
I	4225781	4225800	4225786	+	SPAC1F7.04	utr3	last	52.6667	0.277827
I	4229923	4229942	4229933	+	SPAC1F7.05	utr3	first	8.16667	0.00973188
I	4229984	4230008	4229995	+	SPAC1F7.05	utr3_extended	middle	819.667	0.976763
I	4230008	4230026	4230021	+	SPAC1F7.05	utr3_extended	last	19.5	0.0232373
I	4244745	4244760	4244746	+	SPAC1F7.10	utr3	single	29.6667	1
I	4250171	4250188	4250175	+	SPAC1F7.12	utr3	first	118.5	0.843416
I	4250188	4250203	4250189	+	SPAC1F7.12	utr3	last	22	0.156584
I	4255634	4255645	4255644	+	SPAC21E11.04	utr3	first	5.92857	0.210928
I	4255645	4255668	4255656	+	SPAC21E11.04	utr3	last	22.1786	0.789072
I	4259320	4259350	4259331	+	SPAC21E11.06	utr3	first	13.95	0.52741
I	4259526	4259536	4259534	+	SPAC21E11.06	utr3	middle	12.5	0.47259
I	4259642	4259649	4259642	+	SPAC21E11.06	utr3	last	5.16667	0.195337
I	4260527	4260542	4260531	+	SPAC21E11.07	coding_exon	CDS	6.25	0.302419
I	4261198	4261216	4261204	+	SPAC21E11.07	utr3	first	10.8333	0.524194
I	4261216	4261238	4261228	+	SPAC21E11.07	utr3_extended	last	9.83333	0.475806
I	4263716	4263736	4263716	+	SPAC21E11.08	utr3	first	15.6	0.116927
I	4263750	4263758	4263752	+	SPAC21E11.08	utr3	middle	34.1667	0.25609
I	4263917	4263931	4263920	+	SPAC21E11.08	utr3	middle	99.25	0.74391
I	4263931	4263947	4263938	+	SPAC21E11.08	utr3	last	15.7333	0.117926
I	4267531	4267541	4267531	+	SPAC2C4.05	coding_exon	CDS	11.5	0.0547619
I	4267693	4267702	4267693	+	SPAC2C4.05	utr3	first	7.5	0.0357143
I	4267875	4267886	4267883	+	SPAC2C4.05	utr3	middle	19	0.0904762
I	4267999	4268022	4268004	+	SPAC2C4.05	utr3	middle	169.5	0.807143
I	4268047	4268061	4268059	+	SPAC2C4.05	utr3	last	40.5	0.192857
I	4276543	4276553	4276543	+	SPAC2C4.09	coding_exon	CDS	12.5	NA
I	4276874	4276896	4276885	+	SPAC2C4.09	utr3	single	419.833	1
I	4282116	4282123	4282116	+	SPAC2C4.13	utr3	first	14	0.092511
I	4282192	4282212	4282209	+	SPAC2C4.13	utr3	middle	11.5	0.0759912
I	4282251	4282275	4282256	+	SPAC2C4.13	utr3	middle	15.1667	0.10022
I	4283025	4283046	4283034	+	SPAC2C4.13	utr3	last	136.167	0.89978
I	4296301	4296321	4296301	+	SPAC25G10.01	utr3	first	39	0.549296
I	4296363	4296366	4296363	+	SPAC25G10.01	utr3	middle	5.33333	0.0751174
I	4297061	4297069	4297061	+	SPAC25G10.01	utr3	middle	10.5	0.147887
I	4297308	4297314	4297308	+	SPAC25G10.01	utr3	last	32	0.450704
I	4301279	4301316	4301295	+	SPAC25G10.03	utr3	first	7523.8	0.955037
I	4301316	4301353	4301336	+	SPAC25G10.03	utr3	last	354.217	0.0449627
I	4306384	4306402	4306389	+	SPAC25G10.06	utr3	first	11070.3	0.962582
I	4306446	4306463	4306448	+	SPAC25G10.06	utr3_extended	last	430.333	0.0374181
I	4312931	4312960	4312941	+	SPAC25G10.08	utr3	single	5012.83	1
I	4330475	4330485	4330475	+	SPAC27F1.07	utr3	first	8.83333	0.0191647
I	4330639	4330661	4330646	+	SPAC27F1.07	utr3	middle	150.25	0.325981
I	4330661	4330687	4330675	+	SPAC27F1.07	utr3	last	310.667	0.674019
I	4331234	4331253	4331243	+	SPAC27F1.08	utr5	utr5	27	0.216433
I	4331666	4331676	4331673	+	SPAC27F1.08	coding_exon	CDS	34.3333	0.275217
I	4333005	4333013	4333005	+	SPAC27F1.08	utr3	first	36.5	0.292585
I	4333025	4333045	4333028	+	SPAC27F1.08	utr3	middle	14.0833	0.112892
I	4333061	4333084	4333066	+	SPAC27F1.08	utr3	last	88.25	0.707415
I	4339943	4339962	4339944	+	SPAC23D3.02	utr3_extended	single	31.3333	1
I	4351840	4351842	4351840	+	SPAC23D3.07	coding_exon	CDS	6	0.173494
I	4352048	4352056	4352051	+	SPAC23D3.07	utr3	first	8.5	0.245783
I	4352084	4352101	4352090	+	SPAC23D3.07	utr3	middle	19.8333	0.573494
I	4352101	4352125	4352110	+	SPAC23D3.07	utr3	middle	14.5	0.419277
I	4352358	4352380	4352373	+	SPAC23D3.07	utr3_extended	last	14.75	0.426506
I	4353679	4353691	4353680	+	SPAC23D3.08	utr3	first	90	0.858506
I	4353691	4353702	4353693	+	SPAC23D3.08	utr3	last	14.8333	0.141494
I	4359854	4359863	4359859	+	SPAC23D3.11	utr3	first	14.25	0.721519
I	4360010	4360018	4360016	+	SPAC23D3.11	utr3	last	5.5	0.278481
I	4364625	4364636	4364633	+	SPAC23D3.12	utr3	first	5.33333	0.380952
I	4364953	4364957	4364954	+	SPAC23D3.12	utr3	last	8.66667	0.619048
I	4366242	4366247	4366242	+	SPAC23D3.16	utr3	first	6.83333	0.418367
I	4366309	4366323	4366312	+	SPAC23D3.16	utr3	middle	8.83333	0.540816
I	4366336	4366345	4366343	+	SPAC23D3.16	utr3	last	7.5	0.459184
I	4382752	4382775	4382758	+	SPAC1527.01	utr3	single	14.3333	1
I	4384264	4384271	4384264	+	SPAC1527.02	utr3_extended	single	8.5	1
I	4386817	4386831	4386817	+	SPAC1527.03	utr3	single	6	1
I	4403560	4403571	4403560	+	SPAC29E6.01	coding_exon	CDS	8	NA
I	4403571	4403583	4403581	+	SPAC29E6.01	coding_exon	CDS	6	NA
I	4403802	4403811	4403808	+	SPAC29E6.01	utr3	single	13.8333	1
I	4405994	4406011	4405997	+	SPAC29E6.02	utr3	first	10.5	0.113473
I	4407119	4407129	4407119	+	SPAC29E6.02	utr3	middle	10.6667	0.115274
I	4407783	4407804	4407796	+	SPAC29E6.02	utr3	middle	61.5	0.664625
I	4408274	4408292	4408280	+	SPAC29E6.02	utr3	middle	6.91667	0.0747478
I	4408324	4408345	4408330	+	SPAC29E6.02	utr3	last	31.0333	0.335375
I	4416001	4416024	4416014	+	SPAC29E6.08	coding_exon	CDS	18.3	NA
I	4418577	4418603	4418587	+	SPAC29E6.09	utr3	single	8	1
I	4424694	4424702	4424694	+	SPAC16.01	utr3_extended	single	24.5	1
I	4431707	4431720	4431709	+	SPAC16.04	utr3	single	67	1
I	4442423	4442443	4442424	+	SPAC9E9.03	utr3	first	34.8333	0.0473333
I	4442454	4442472	4442456	+	SPAC9E9.03	utr3	middle	26.8333	0.0364625
I	4442500	4442523	4442512	+	SPAC9E9.03	utr3	middle	612.083	0.831729
I	4442523	4442540	4442523	+	SPAC9E9.03	utr3_extended	last	123.833	0.168271
I	4443265	4443288	4443281	+	SPAC9E9.04	intron	intron	12.8333	NA
I	4443342	4443349	4443347	+	SPAC9E9.04	intron	intron	47.5	NA
I	4444175	4444203	4444195	+	SPAC9E9.04	utr3	single	579.5	1
I	4445538	4445553	4445545	+	SPAC9E9.05	utr3	first	8.75	0.355932
I	4445601	4445620	4445605	+	SPAC9E9.05	utr3	middle	15.8333	0.644068
I	4445810	4445827	4445810	+	SPAC9E9.05	utr3	last	8.7	0.353898
I	4452040	4452069	4452048	+	SPAC9E9.08	coding_exon	CDS	26.8333	1.45045
I	4452125	4452137	4452131	+	SPAC9E9.08	coding_exon	CDS	13	0.702703
I	4453152	4453157	4453154	+	SPAC9E9.08	utr3	first	13.5	0.72973
I	4453288	4453301	4453288	+	SPAC9E9.08	utr3	last	5	0.27027
I	4462858	4462860	4462858	+	SPAC9E9.11	utr3	first	8	0.352423
I	4462900	4462912	4462900	+	SPAC9E9.11	utr3	last	14.7	0.647577
I	4470409	4470426	4470409	+	SPAC9E9.14	utr3	first	7.5	0.592105
I	4470438	4470452	4470444	+	SPAC9E9.14	utr3	last	5.16667	0.407895
I	4471376	4471397	4471394	+	SPAC9E9.15	utr3	single	10.1667	1
I	4472739	4472741	4472739	+	SPAC17C9.16c	coding_exon	CDS	7.5	0.193906
I	4472884	4472887	4472884	+	SPAC17C9.16c	coding_exon	CDS	7	0.180979
I	4473805	4473829	4473814	+	SPAC17C9.16c	coding_exon	CDS	12.3	0.318006
I	4474553	4474564	4474561	+	SPAC17C9.16c	utr3	first	10.3333	0.267159
I	4474585	4474596	4474585	+	SPAC17C9.16c	utr3	middle	11.4286	0.295476
I	4474649	4474656	4474649	+	SPAC17C9.16c	utr3	last	27.25	0.704524
I	4475850	4475859	4475850	+	SPAC17C9.15c	utr3	first	13	0.107438
I	4476360	4476377	4476360	+	SPAC17C9.15c	utr3	middle	5.5	0.0454545
I	4476522	4476529	4476524	+	SPAC17C9.15c	utr3	last	108	0.892562
I	4477577	4477584	4477582	+	SPAC17C9.13c	utr5	utr5	5.5	NA
I	4478880	4478894	4478886	+	SPAC17C9.13c	utr3	single	133.5	1
I	4480686	4480689	4480686	+	SPAC17C9.11c	utr5	utr5	5.33333	0.0296984
I	4481980	4481999	4481982	+	SPAC17C9.11c	utr3	first	43	0.239443
I	4482337	4482346	4482342	+	SPAC17C9.11c	utr3_extended	middle	6.75	0.037587
I	4482456	4482471	4482468	+	SPAC17C9.11c	utr3_extended	middle	5.83333	0.0324826
I	4482471	4482494	4482482	+	SPAC17C9.11c	utr3_extended	last	136.583	0.760557
I	4484485	4484509	4484489	+	SPAC17C9.09c	utr3	first	411	0.947368
I	4484625	4484642	4484629	+	SPAC17C9.09c	utr3	middle	19.9667	0.0460238
I	4484642	4484660	4484654	+	SPAC17C9.09c	utr3	last	22.8333	0.0526316
I	4490489	4490506	4490503	+	SPAC17C9.05c	utr5	utr5	6.16667	NA
I	4491652	4491661	4491659	+	SPAC17C9.05c	utr3	single	21.1667	1
I	4500394	4500401	4500399	+	SPAC17C9.01c	utr3	first	14.8333	0.581699
I	4500429	4500445	4500439	+	SPAC17C9.01c	utr3	last	10.6667	0.418301
I	4501668	4501687	4501676	+	SPAC1851.02	utr3_extended	first	124.5	0.916564
I	4501718	4501744	4501735	+	SPAC1851.02	utr3_extended	last	11.3333	0.0834356
I	4503668	4503674	4503668	+	SPAC1851.03	utr3	first	7	0.374332
I	4504114	4504132	4504126	+	SPAC1851.03	utr3	middle	10	0.534759
I	4504395	4504412	4504408	+	SPAC1851.03	utr3	middle	5.5	0.294118
I	4504708	4504738	4504722	+	SPAC1851.03	utr3	last	8.7	0.465241
I	4520119	4520132	4520128	+	SPAC27D7.06	utr3	first	30	0.446097
I	4520165	4520186	4520165	+	SPAC27D7.06	utr3_extended	last	37.25	0.553903
I	4542522	4542524	4542522	+	SPAC637.03	utr5	utr5	17.5	0.303468
I	4543426	4543449	4543435	+	SPAC637.03	utr3	first	15.8333	0.274566
I	4543808	4543831	4543814	+	SPAC637.03	utr3_extended	last	41.8333	0.725434
I	4546802	4546823	4546809	+	SPAC637.04	utr3	first	51	0.768844
I	4546840	4546858	4546840	+	SPAC637.04	utr3	last	15.3333	0.231156
I	4551156	4551178	4551174	+	SPAC637.06	utr3	first	5.66667	0.08
I	4551435	4551458	4551447	+	SPAC637.06	utr3_extended	last	65.1667	0.92
I	4553657	4553676	4553664	+	SPAC637.07	utr3	first	26	0.0331668
I	4553676	4553702	4553687	+	SPAC637.07	utr3	last	757.917	0.966833
I	4555149	4555174	4555163	+	SPAC637.08	utr3	single	9.66667	1
I	4557369	4557408	4557388	+	SPAC637.09	utr3	single	383.517	1
I	4560456	4560463	4560461	+	SPAC637.11	coding_exon	CDS	8.8	NA
I	4561380	4561383	4561380	+	SPAC637.11	utr3	single	5	1
I	4570308	4570330	4570315	+	SPAC31F12.01	utr3	first	13.1667	0.349558
I	4570343	4570348	4570345	+	SPAC31F12.01	utr3	middle	13	0.345133
I	4570412	4570416	4570412	+	SPAC31F12.01	utr3	last	24.5	0.650442
I	4580321	4580327	4580321	+	SPAC12B10.03	utr3	first	6.16667	0.552239
I	4580345	4580349	4580345	+	SPAC12B10.03	utr3	last	5	0.447761
I	4582167	4582194	4582183	+	SPAC12B10.04	utr3	single	167.833	1
I	4584403	4584412	4584407	+	SPAC12B10.05	utr3	single	370.833	1
I	4586375	4586398	4586378	+	SPAC12B10.07	utr3	single	78	1
I	4589653	4589667	4589656	+	SPAC12B10.09	utr3	first	18.3333	0.621469
I	4589667	4589679	4589670	+	SPAC12B10.09	utr3	middle	10.1667	0.344633
I	4589691	4589704	4589691	+	SPAC12B10.09	utr3	middle	6.83333	0.231638
I	4589704	4589719	4589707	+	SPAC12B10.09	utr3	last	11.1667	0.378531
I	4592605	4592608	4592605	+	SPAC12B10.11	coding_exon	CDS	5.5	NA
I	4597377	4597383	4597377	+	SPAC12B10.13	utr3	first	5.5	0.305556
I	4597398	4597414	4597411	+	SPAC12B10.13	utr3_extended	last	12.5	0.694444
I	4611357	4611372	4611363	+	SPAC1093.01	coding_exon	CDS	18.5	0.587302
I	4611481	4611494	4611486	+	SPAC1093.01	utr3	first	18.5	0.587302
I	4611576	4611597	4611576	+	SPAC1093.01	utr3	middle	7.26667	0.230688
I	4611703	4611713	4611706	+	SPAC1093.01	utr3	last	13	0.412698
I	4612818	4612827	4612824	+	SPAC1093.02	coding_exon	CDS	5.66667	0.0332031
I	4613098	4613102	4613100	+	SPAC1093.02	utr3	first	46.5	0.272461
I	4613148	4613169	4613165	+	SPAC1093.02	utr3	middle	124.167	0.727539
I	4613181	4613200	4613188	+	SPAC1093.02	utr3	last	23.1667	0.135742
I	4616421	4616429	4616421	+	SPAC1093.03	utr3	first	8.83333	0.228448
I	4616664	4616684	4616681	+	SPAC1093.03	utr3	middle	23.6667	0.612069
I	4616857	4616871	4616857	+	SPAC1093.03	utr3	middle	5.66667	0.146552
I	4617126	4617142	4617126	+	SPAC1093.03	utr3	last	15	0.387931
I	4622060	4622080	4622061	+	SPAC1093.05	utr3	first	56	0.323699
I	4622080	4622112	4622098	+	SPAC1093.05	utr3	middle	33.7381	0.195018
I	4622125	4622141	4622130	+	SPAC1093.05	utr3	middle	26.25	0.151734
I	4622141	4622153	4622142	+	SPAC1093.05	utr3	middle	10.8333	0.0626204
I	4622202	4622221	4622206	+	SPAC1093.05	utr3	middle	117	0.676301
I	4622342	4622357	4622342	+	SPAC1093.05	utr3	last	5.75	0.033237
I	4636725	4636740	4636725	+	SPAC30C2.02	utr3	first	10.5	0.0276534
I	4636788	4636803	4636801	+	SPAC30C2.02	utr3	middle	7.5	0.0197524
I	4636816	4636829	4636825	+	SPAC30C2.02	utr3	middle	17.7	0.0466157
I	4636829	4636854	4636841	+	SPAC30C2.02	utr3	middle	90.2	0.237556
I	4636854	4636881	4636866	+	SPAC30C2.02	utr3	middle	289.5	0.762444
I	4636881	4636898	4636895	+	SPAC30C2.02	utr3	last	25.3333	0.0667193
I	4637930	4637939	4637934	+	SPAC30C2.03	utr3	first	5.5	0.194118
I	4637967	4637990	4637971	+	SPAC30C2.03	utr3_extended	last	22.8333	0.805882
I	4639472	4639476	4639472	+	SPAC30C2.04	utr3	first	17.25	0.113987
I	4639513	4639529	4639523	+	SPAC30C2.04	utr3	middle	40.6667	0.268722
I	4639529	4639549	4639539	+	SPAC30C2.04	utr3	last	110.667	0.731278
I	4640576	4640592	4640581	+	SPAC30C2.05	utr3	first	19.1667	0.483193
I	4640605	4640616	4640610	+	SPAC30C2.05	utr3	middle	20.5	0.516807
I	4640818	4640835	4640819	+	SPAC30C2.05	utr3_extended	last	10.9167	0.27521
I	4645052	4645066	4645056	+	SPAC30C2.07	utr3	first	33.5	0.87013
I	4645099	4645111	4645101	+	SPAC30C2.07	utr3	last	5	0.12987
I	4647610	4647628	4647617	+	SPAC30C2.08	utr3	first	51.5	0.696888
I	4647662	4647673	4647662	+	SPAC30C2.08	utr3	last	22.4	0.303112
I	4650309	4650326	4650311	+	SPAC1635.01	utr3	single	149.417	1
I	4655134	4655159	4655152	+	SPAC144.03	intron	intron	11.1667	0.114432
I	4656438	4656450	4656448	+	SPAC144.03	utr3	first	14	0.143467
I	4656469	4656491	4656477	+	SPAC144.03	utr3_extended	middle	55	0.563621
I	4656491	4656506	4656504	+	SPAC144.03	utr3_extended	middle	39	0.399658
I	4656535	4656568	4656549	+	SPAC144.03	utr3_extended	last	42.5833	0.436379
I	4663777	4663785	4663777	+	SPAC144.05	utr3	first	14.3333	0.609929
I	4663801	4663807	4663801	+	SPAC144.05	utr3	last	9.16667	0.390071
I	4667140	4667151	4667140	+	SPAC144.06	utr3	first	9.66667	0.331429
I	4668391	4668414	4668411	+	SPAC144.06	utr3_extended	last	19.5	0.668571
I	4669705	4669713	4669711	+	SPAC144.08	intron	intron	14	NA
I	4669747	4669763	4669748	+	SPAC144.08	intron	intron	5.75	NA
I	4670229	4670243	4670231	+	SPAC144.08	utr3	single	51	1
I	4675117	4675141	4675130	+	SPAC144.11	utr3	first	158	0.823632
I	4675141	4675160	4675149	+	SPAC144.11	utr3	last	33.8333	0.176368
I	4677471	4677473	4677471	+	SPAC144.12	utr3	first	14.5	0.0940541
I	4677543	4677554	4677543	+	SPAC144.12	utr3	middle	83.5	0.541622
I	4677554	4677569	4677554	+	SPAC144.12	utr3	middle	5.25	0.0340541
I	4677680	4677706	4677700	+	SPAC144.12	utr3	last	70.6667	0.458378
I	4683231	4683242	4683231	+	SPAC144.14	utr3	first	6.9	0.479167
I	4683242	4683263	4683248	+	SPAC144.14	utr3_extended	last	7.5	0.520833
I	4687223	4687240	4687229	+	SPAC144.16	utr3	first	70.2	0.893888
I	4687258	4687265	4687263	+	SPAC144.16	utr3	middle	5.5	0.070034
I	4687324	4687340	4687331	+	SPAC144.16	utr3	middle	5.16667	0.0657895
I	4688299	4688302	4688299	+	SPAC144.16	utr3	last	8.33333	0.106112
I	4691450	4691458	4691450	+	SPAC144.18	utr3	first	5	0.0187718
I	4691650	4691662	4691651	+	SPAC144.18	utr3	middle	17.3571	0.0651649
I	4691662	4691680	4691673	+	SPAC144.18	utr3	middle	249	0.934835
I	4691709	4691727	4691718	+	SPAC144.18	utr3	last	16.3333	0.0613212
I	4693222	4693244	4693225	+	SPAC1834.01	coding_exon	CDS	36.1	0.0312059
I	4693244	4693275	4693263	+	SPAC1834.01	utr3	first	584.583	0.505331
I	4693275	4693308	4693287	+	SPAC1834.01	utr3	middle	490.333	0.423858
I	4693345	4693359	4693347	+	SPAC1834.01	utr3	middle	13.75	0.0118859
I	4693359	4693388	4693371	+	SPAC1834.01	utr3	middle	572.25	0.494669
I	4693388	4693410	4693404	+	SPAC1834.01	utr3	middle	169.667	0.146665
I	4693486	4693517	4693497	+	SPAC1834.01	utr3	middle	50.5833	0.0437257
I	4693530	4693559	4693539	+	SPAC1834.01	utr3	last	69.6667	0.0602219
I	4696752	4696759	4696758	+	SPAC1834.02	coding_exon	CDS	8.5	0.0754996
I	4698511	4698537	4698523	+	SPAC1834.02	utr3	first	50.75	0.450777
I	4698537	4698568	4698551	+	SPAC1834.02	utr3	middle	61.8333	0.549223
I	4698568	4698591	4698584	+	SPAC1834.02	utr3	last	17.1667	0.15248
I	4700507	4700514	4700509	+	SPAC1834.04	utr3	first	33.8333	0.0337911
I	4700552	4700568	4700557	+	SPAC1834.04	utr3	middle	835.5	0.834457
I	4700568	4700592	4700568	+	SPAC1834.04	utr3_extended	middle	165.75	0.165543
I	4700661	4700676	4700672	+	SPAC1834.04	utr3_extended	middle	26.1667	0.026134
I	4700980	4700999	4700980	+	SPAC1834.04	utr3_extended	last	14.3333	0.0143154
I	4704551	4704568	4704556	+	SPAC1834.05	utr3	first	11.6667	0.424242
I	4704602	4704613	4704610	+	SPAC1834.05	utr3	middle	15.8333	0.575758
I	4704709	4704730	4704715	+	SPAC1834.05	utr3	last	6.83333	0.248485
I	4709025	4709047	4709036	+	SPAC1834.07	utr3	first	8.25	0.546961
I	4709093	4709099	4709093	+	SPAC1834.07	utr3	last	6.83333	0.453039
I	4710092	4710109	4710102	+	SPAC1834.08	intron	intron	15.6667	NA
I	4713550	4713569	4713564	+	SPAC1834.08	coding_exon	CDS	11.8333	NA
I	4713569	4713588	4713580	+	SPAC1834.08	coding_exon	CDS	69.25	NA
I	4717720	4717736	4717726	+	SPAC1834.09	utr3	single	267.167	1
I	4724432	4724451	4724436	+	SPAC17D4.01	utr3	first	24	0.0435203
I	4724483	4724498	4724486	+	SPAC17D4.01	utr3	middle	37.5	0.0680005
I	4724528	4724546	4724528	+	SPAC17D4.01	utr3	middle	66	0.119681
I	4724569	4724592	4724578	+	SPAC17D4.01	utr3	middle	114.167	0.207024
I	4724592	4724622	4724605	+	SPAC17D4.01	utr3	middle	437.3	0.792976
I	4724622	4724650	4724639	+	SPAC17D4.01	utr3	last	15.6667	0.0284091
I	4725189	4725204	4725193	+	SPAC17D4.02	coding_exon	CDS	39.6667	NA
I	4726811	4726820	4726811	+	SPAC17D4.02	utr3	single	11.2667	1
I	4731985	4732002	4731993	+	SPAC17D4.04	coding_exon	CDS	10	0.330761
I	4732036	4732067	4732048	+	SPAC17D4.04	utr3	first	16.3333	0.540243
I	4732081	4732115	4732101	+	SPAC17D4.04	utr3	last	13.9	0.459757
I	4735745	4735759	4735753	+	SPAC458.03	coding_exon	CDS	7.83333	NA
I	4741461	4741468	4741466	+	SPAC458.05	coding_exon	CDS	9	NA
I	4742671	4742697	4742689	+	SPAC458.05	utr3	single	25.25	1
I	4746198	4746218	4746212	+	SPAC458.07	utr3_extended	single	25.5	1
I	4753803	4753814	4753811	+	SPAPYUG7.05	utr3	first	11.3333	0.0278803
I	4753845	4753870	4753852	+	SPAPYUG7.05	utr3	last	395.167	0.97212
I	4754648	4754667	4754653	+	SPAPYUG7.06	coding_exon	CDS	22.5	NA
I	4761738	4761747	4761739	+	SPAC1782.03	utr5	utr5	5.5	NA
I	4764115	4764125	4764115	+	SPAC1782.04	utr3	first	24.5833	0.817175
I	4764169	4764171	4764169	+	SPAC1782.04	utr3	last	5.5	0.182825
I	4765622	4765643	4765627	+	SPAC1782.05	utr3	first	45.5	0.81982
I	4765643	4765667	4765659	+	SPAC1782.05	utr3	last	10	0.18018
[truncated: 8,589 more rows]
