# Supplementary material for: Delineating yeast cleavage and polyadenylation signals using deep learning
Source: HighWire-hosted journal article supplement (doi:10.1101/gr.278606.123), 2024-06-24
Supplement: Supplemental_Table_S7.xlsx [file Supplemental_Table_S7.xlsx]

## Sheet: Legend
Table S7. The motifs showing significant importance scores from the PolyaClassifer model in S. pombe.
This table contains the motif importance quantification learned from the S.pombe-specific PolyaClassifier model for 4mers, 5mers, and 6mers.
Description of the columns:
Motif	The hexamer sequence for the motif of interest.
Family	The assigned motif family based on the sequence composition of the motif.
Score	The per-site importance score for the motif of interest in the denoted region.
95% confidence interval: Lower bound	The lower bound on the 95% confidence interval around the per-site importance score in the denoted region.
95% confidence interval: Upper bound	The upper bound on the 95% confidence interval around the per-site importance score in the denoted region.
Sum importance profile	The position-specific sum importance score for each motif at the indicated position centered around the cleavage site.

## Sheet: 4mer motif importance
		[-80, -30) region			[-30, -15) region			[-15, -5) region			[-5, 2) region			[2, 15) region			[15, 60] region			Sum importance profile
Motif	Family	Mean importance score	95% confidence interval: Lower bound	95% confidence interval: Upper bound	Mean importance score	95% confidence interval: Lower bound	95% confidence interval: Upper bound	Mean importance score	95% confidence interval: Lower bound	95% confidence interval: Upper bound	Mean importance score	95% confidence interval: Lower bound	95% confidence interval: Upper bound	Mean importance score	95% confidence interval: Lower bound	95% confidence interval: Upper bound	Mean importance score	95% confidence interval: Lower bound	95% confidence interval: Upper bound	-250	-249	-248	-247	-246	-245	-244	-243	-242	-241	-240	-239	-238	-237	-236	-235	-234	-233	-232	-231	-230	-229	-228	-227	-226	-225	-224	-223	-222	-221
AAAA	A-rich_d0	-0.4839	-0.510191	-0.457609	1.54353	1.36413	1.72293	-0.205069	-0.436809	0.0266708	1.87888	1.26131	2.49645	0.229743	0.150938	0.308548	0.369321	0.353305	0.385336	-32.0567	-28.7552	-46.6843	-61.7388	-14.7571	-19.2633	-4.11952	-5.10633	-8.48851	-7.34518	-20.0804	-23.9163	-11.0281	-17.4035	-2.71443	0.353299	-3.95365	0.115375	2.76896	-2.07551	-6.87116	4.52773	-0.286117	5.35004	0.141853	7.56953	5.53631	11.0225	14.8522	10.1656
AAGA	A-rich_d1	-0.343449	-0.374104	-0.312794	0.570146	0.358794	0.781497	-0.675666	-0.872204	-0.479129	1.0172	0.526668	1.50773	0.101328	0.00426885	0.198387	0.320061	0.281404	0.358717	-3.67085	2.57888	-8.0321	1.21955	1.37052	-5.60378	4.98148	9.74032	5.54712	-0.143665	2.51026	3.62247	0.0110442	1.8451	9.63472	15.2431	18.7203	1.06392	6.64797	4.7297	18.9192	9.4148	14.869	3.63892	15.4093	8.34478	9.03431	12.7523	12.1652	7.7876
AGUA	GUA_d0	0.0402372	-0.0520494	0.132524	0.704771	0.391844	1.0177	-1.15809	-1.39435	-0.921825	1.4085	0.879474	1.93752	0.763135	0.658842	0.867429	1.07191	1.03614	1.10767	-11.9699	-4.06733	-8.68735	-19.8216	-3.07141	-17.2656	-14.9852	-17.8281	-8.33474	-12.5011	-27.7642	-17.7146	-7.67997	-28.0887	-10.0327	-22.0899	-12.1808	-24.5874	-11.8998	-7.86057	-19.6294	-14.4381	-26.7891	-12.368	-5.2683	-2.40568	-5.87868	-26.0445	-13.286	-20.1266
AUUU	U-rich_d1	0.407762	0.382787	0.432738	1.54068	1.459	1.62235	1.48839	1.42147	1.55531	3.72824	3.50824	3.94824	0.98192	0.909517	1.05432	0.539085	0.524597	0.553572	-9.72885	-11.1857	-23.4688	-14.7523	-10.0945	-22.5879	-18.264	-17.8128	-2.99689	0.765062	-10.4362	-47.3991	-19.0875	-15.1079	-10.2226	-9.61843	-8.36003	-18.0874	-10.4611	-1.39403	-2.81257	-11.3637	1.1029	-1.5286	3.9614	1.55778	-4.3595	-2.58606	-4.21365	-6.38445
CUUU	U-rich_d1	0.432096	0.414632	0.44956	0.401685	0.32684	0.47653	1.44705	1.38642	1.50768	1.69052	1.57403	1.80702	0.997825	0.92697	1.06868	0.259918	0.245522	0.274315	-0.8976	6.3135	12.0635	20.3372	20.4262	20.576	8.06673	15.5772	16.6088	20.7006	15.4754	5.03149	3.5097	10.0544	2.6638	5.63397	10.8189	21.9107	12.0674	12.5259	14.9066	26.5098	23.9505	29.1285	26.252	19.0217	21.0428	21.8866	15.2438	12.2023
GAAG	A-rich_d2	-0.255423	-0.291148	-0.219698	-0.329177	-0.512755	-0.145598	-0.803962	-1.02245	-0.585469	0.432271	-0.478805	1.34335	-0.105327	-0.215269	0.00461569	0.102225	0.0703166	0.134134	8.77823	10.7287	27.7485	33.6612	21.2052	23.3616	41.3355	38.6138	28.5656	20.6965	10.0358	21.3272	24.9536	38.4296	31.744	26.6708	17.1228	23.5793	32.2676	28.4665	13.8434	30.5002	26.2539	28.3838	28.8487	6.60723	26.6867	31.4767	12.273	19.5902
GUAG	GUA-UAG_d0	0.0131451	-0.0711755	0.0974656	0.230945	-0.100401	0.562291	-1.47082	-1.67182	-1.26981	0.771443	-0.573283	2.11617	1.02233	0.908781	1.13589	1.3305	1.29837	1.36263	0	-9.80075	-4.0868	-7.27583	-13.3871	-0.695222	-5.45384	-5.28751	-22.5458	-10.346	-3.19002	-10.7023	-13.8967	-2.56367	-19.9604	-23.4267	-17.8813	-17.9958	-10.6273	-7.68719	-26.1676	-7.36849	-8.00925	-8.8176	-13.3797	-3.96365	-5.52171	-9.18021	-23.4146	-6.36404
GUAU	GUA_d0	-0.0920874	-0.141449	-0.0427263	0.428933	0.274115	0.583751	-0.236332	-0.336042	-0.136622	1.87695	1.46402	2.28988	0.838199	0.777147	0.899251	0.987995	0.964123	1.01187	-9.1201	-10.1318	-18.3645	-14.3379	-13.05	-15.124	-16.0454	-12.9366	-16.7432	-20.7738	-27.5966	-17.6028	-2.74719	-3.542	-11.438	-21.8659	-20.3546	-19.8356	-16.5277	-17.0961	-14.3253	-25.6536	-14.3656	-16.9495	-14.8683	-7.65731	-10.4741	-5.39737	-19.2897	-5.44607
GUUU	U-rich_d1	0.567735	0.543888	0.591583	0.738745	0.656655	0.820835	1.38196	1.32155	1.44237	1.00694	0.875023	1.13885	0.902411	0.854402	0.95042	0.415991	0.40228	0.429702	-1.05727	-2.21203	2.74327	11.1496	8.88358	6.21821	5.29602	5.24622	10.8115	15.6977	17.4215	15.4439	4.2338	2.96384	2.90886	9.79725	9.63938	11.9606	15.9898	9.32609	7.91201	17.453	15.3212	13.9461	14.5546	8.01236	8.03575	18.1652	7.7182	6.78051
UAAA	A-rich_d1	-0.139604	-0.188387	-0.0908198	1.83814	1.65481	2.02147	-0.095677	-0.247608	0.0562542	3.15744	2.72259	3.5923	0.65933	0.583973	0.734686	0.948646	0.913099	0.984192	-17.9509	-23.2476	-45.2632	-24.368	-18.001	-28.6661	-15.9501	-11.9292	-25.7546	-18.0044	-27.8514	-23.0753	-16.6065	-21.4628	-9.759	-40.1817	-18.365	-7.87092	-14.3202	-36.2722	-16.1965	-27.2173	-10.9363	-18.4434	-15.603	-12.7199	-21.9639	-19.8505	-21.993	-16.4668
UAAU	A-rich_d2	0.293993	0.230521	0.357465	3.30137	3.14091	3.46184	0.260702	0.124191	0.397213	3.49844	3.09228	3.90459	0.573148	0.483778	0.662519	0.766967	0.721479	0.812455	-35.4181	-42.2134	-40.4121	-51.6518	-23.33	-12.6231	-14.4621	-18.067	-8.26394	-25.4854	-8.69904	-17.7063	-13.8401	-19.4877	-25.6593	-32.7934	-16.0249	-29.1488	-7.67341	-17.1647	-9.00519	-23.5525	-12.8277	-12.7597	-4.63023	-10.4521	-8.56711	-12.7447	-9.79772	-23.737
UAGU	UAG_d0	0.7738	0.707935	0.839665	1.59658	1.42758	1.76557	-0.325588	-0.456011	-0.195165	1.81949	1.37864	2.26034	0.624394	0.514758	0.73403	1.03026	0.986903	1.07361	-3.64495	-8.91099	-10.8715	-18.9016	-23.5913	-7.4739	-9.84193	-11.4888	-14.9361	-20.031	-9.56778	-6.50193	-9.87641	-8.99775	-16.8401	-17.6778	-24.446	-24.8755	-9.58874	-12.1042	-13.7893	-22.5489	-17.6483	-2.93345	-6.11877	-1.22769	-18.5538	-7.14656	-18.6044	-15.263
UAUU	U-rich_d1	0.354867	0.325701	0.384034	1.41057	1.33102	1.49013	1.11315	1.0581	1.1682	3.19856	2.96926	3.42786	0.858675	0.811184	0.906167	0.650221	0.630254	0.670188	-7.63629	-19.6588	-23.6738	-18.6576	-27.8576	-20.7121	-28.9057	-15.6209	-3.68575	-17.0539	-36.8157	-36.9377	-29.4149	-10.0508	-16.2148	-29.3409	-34.8784	-22.6827	-14.4166	-11.7691	-12.9053	-13.5383	-7.71742	-7.61606	-9.7826	-13.3699	-7.74184	-4.73904	-7.23978	-17.4528
UCUU	U-rich_d1	0.395779	0.375348	0.41621	0.415351	0.330575	0.500127	1.38896	1.32658	1.45134	1.45826	1.33318	1.58334	0.893812	0.821787	0.965837	0.230439	0.216465	0.244412	8.5043	7.72301	18.5777	15.2293	10.2878	3.88963	8.81189	3.54145	11.7732	15.8731	6.94006	8.47191	10.1817	-2.88948	4.77322	14.6515	13.3872	13.1174	17.616	6.2984	19.6297	13.4756	21.8675	21.1844	9.42554	7.0003	16.1887	14.9847	7.15414	7.37458
UGUA	GUA_d0	-0.174392	-0.227596	-0.121187	0.497876	0.281522	0.71423	-0.199995	-0.372156	-0.0278352	2.5014	2.07942	2.92339	1.22361	1.1592	1.28801	1.28627	1.25818	1.31436	-9.04897	-11.4542	-18.0381	-9.51126	-6.54774	-4.29324	-8.74499	-20.8629	-10.2783	-8.51484	-15.5917	-7.32747	-4.8875	-15.0291	-16.1015	-6.97034	-10.1543	-3.36031	-14.9886	-23.9367	-10.5902	-9.77466	-10.6122	-8.81815	-10.7228	-4.36271	-12.7256	-18.462	-1.73765	-8.05401
UUAG	UAG_d0	0.93372	0.887388	0.980052	1.48581	1.34122	1.63039	0.0948305	-0.0220382	0.211699	2.25341	1.82326	2.68357	0.488002	0.386159	0.589844	0.531996	0.510334	0.553658	-9.18279	-9.71174	-8.93714	-19.6542	-19.1628	-8.7974	-10.946	-9.41566	-17.8249	-2.91796	-8.77945	-15.2361	-11.165	-12.5285	-7.65263	-18.8127	-16.1307	-6.33129	-10.3367	-8.65863	-28.3291	-24.2644	-7.2643	-11.4962	-5.97576	-10.4707	-11.038	-18.3407	-22.3987	-19.5835
UUAU	U-rich_d1	0.434079	0.404649	0.463509	1.61824	1.53838	1.69811	1.20166	1.1503	1.25301	3.58306	3.36207	3.80405	0.888963	0.825228	0.952698	0.449116	0.436552	0.461679	-18.6728	-27.3285	-17.3398	-45.0053	-19.2771	-15.2511	-12.4054	-11.8624	-14.0989	-40.5744	-20.1731	-14.3896	-24.8852	-22.1823	-23.4936	-26.2416	-16.5119	-27.6267	-15.1029	-15.1937	-8.84694	-11.218	-6.01124	-5.53608	-8.1158	-15.5288	-7.251	-9.34494	-6.08033	-10.5579
UUCA	U-rich_d2	0.167373	0.142361	0.192385	1.27308	1.12078	1.42537	1.36844	1.28028	1.45661	3.4274	3.10447	3.75033	0.692289	0.619842	0.764736	0.186373	0.17188	0.200866	-1.58703	-1.0023	-12.5417	-0.130487	-9.463	2.86001	-3.57741	-2.82958	-15.561	-3.97062	-2.15201	6.95952	0.217945	-1.71327	-3.09598	-0.485544	4.74867	-3.6631	-7.46115	6.77542	-1.32953	-0.138858	5.61788	-1.43314	3.46008	4.66933	-0.349373	9.85223	3.23281	6.50352
UUCU	U-rich_d1	0.400993	0.382193	0.419793	0.596371	0.508429	0.684314	1.58119	1.52406	1.63833	1.40246	1.2821	1.52282	0.928588	0.856458	1.00072	0.202389	0.187272	0.217507	2.83739	9.00862	6.5751	7.24643	3.82549	2.30786	2.53718	4.74843	-1.04947	7.68345	17.538	22.3132	2.30496	4.01697	5.43802	6.03717	5.34833	5.57856	9.03974	14.058	10.4098	12.0081	15.0673	9.55207	15.4331	13.5269	14.7867	10.8643	9.68681	6.92009
UUGU	U-rich_d1	0.276178	0.255579	0.296777	0.388476	0.326389	0.450563	1.11888	1.04411	1.19364	0.601517	0.445327	0.757706	1.21917	1.16026	1.27808	0.834746	0.803571	0.865921	-3.25715	-3.14386	-1.82942	-1.42199	3.31734	4.74585	-8.58929	1.79605	-0.484545	3.59197	14.7291	3.91636	-0.00929137	-1.40831	-0.172247	-3.27427	6.94703	3.5234	5.81774	5.03674	9.36383	3.22787	3.82271	6.94978	11.1398	9.28185	0.413627	10.471	-0.709956	5.65542
UUUA	U-rich_d1	0.620199	0.589876	0.650523	1.62088	1.52874	1.71301	1.31502	1.24143	1.3886	3.87727	3.63935	4.11519	1.09433	1.03132	1.15735	0.49256	0.478488	0.506632	-24.393	-30.053	-52.1148	-28.865	-12.1593	-10.0896	-12.7551	-25.8613	-40.6898	-4.37352	-5.49109	-15.8984	-10.8557	-11.6009	-28.3117	-16.7953	-13.5773	-15.682	-9.56496	-8.38566	-4.15528	-4.52916	-10.951	-4.10136	-5.3102	-8.22245	-6.53481	-4.50797	-5.78927	-4.37401
UUUC	U-rich_d1	0.364606	0.348894	0.380317	0.681121	0.606825	0.755417	1.84132	1.78406	1.89857	1.68021	1.52341	1.83701	1.01108	0.940768	1.0814	0.248074	0.234812	0.261336	5.20045	3.29534	8.59636	11.4829	8.26198	2.7329	4.05781	-3.59694	4.76662	15.2679	17.412	12.6442	3.74186	0.0238228	0.973381	1.56301	3.75392	7.06379	12.6634	23.3683	10.1196	9.90483	15.1419	18.6169	18.6481	18.3913	19.1858	21.4374	20.1669	15.069
UUUG	U-rich_d1	0.356311	0.340624	0.371998	0.442286	0.381014	0.503558	1.1944	1.13006	1.25874	0.878113	0.74844	1.00779	1.24296	1.18335	1.30257	0.512141	0.488703	0.535579	14.536	11.8936	25.905	28.893	16.1267	14.8108	15.9801	18.1579	23.0609	26.6543	21.9747	30.3294	8.79638	11.1139	7.11199	11.2214	13.8982	27.1104	33.475	14.9028	12.9892	22.8862	25.1835	20.1785	26.0952	23.7386	39.5782	18.3382	16.3688	12.7933
UUUU	U-rich_d0	0.563944	0.548165	0.579723	1.05129	1.00189	1.10069	2.01379	1.97423	2.05336	1.57591	1.49692	1.6549	1.48699	1.4404	1.53359	0.50379	0.494188	0.513393	-12.5977	-10.9719	-3.61455	3.37109	-1.1642	-1.41198	-10.6512	-0.542306	12.5058	23.1355	19.5393	-4.22496	-10.9095	-25.11	-11.4575	-2.07972	1.61749	8.66547	10.3158	10.7296	22.8841	9.86035	17.3393	37.3563	25.104	44.3615	30.7231	25.9731	27.5617	12.2418
[truncated: 471 more columns]

## Sheet: 5mer motif importance
		[-80, -30) region			[-30, -15) region			[-15, -5) region			[-5, 2) region			[2, 15) region			[15, 60] region			Sum importance profile
Motif	Family	Mean importance score	95% confidence interval: Lower bound	95% confidence interval: Upper bound	Mean importance score	95% confidence interval: Lower bound	95% confidence interval: Upper bound	Mean importance score	95% confidence interval: Lower bound	95% confidence interval: Upper bound	Mean importance score	95% confidence interval: Lower bound	95% confidence interval: Upper bound	Mean importance score	95% confidence interval: Lower bound	95% confidence interval: Upper bound	Mean importance score	95% confidence interval: Lower bound	95% confidence interval: Upper bound	-250	-249	-248	-247	-246	-245	-244	-243	-242	-241	-240	-239	-238	-237	-236	-235	-234	-233	-232	-231	-230	-229	-228	-227	-226	-225	-224	-223	-222	-221
AAAAA	A-rich_d0	-0.626874	-0.681115	-0.572634	2.015	1.65514	2.37485	-0.711253	-1.3161	-0.106401	1.62543	-0.101062	3.35192	0.316796	0.167144	0.466449	0.397196	0.371728	0.422665	-8.9628	-15.5531	-12.2641	-29.7653	-17.7998	-1.62133	-0.628967	-4.86412	-4.48176	-5.89293	-0.402886	-17.9011	-5.95978	-5.56244	-2.3557	-0.0892014	-0.902092	1.16118	-0.666584	1.81339	1.66513	0.872552	4.13347	3.74546	3.47198	4.67932	2.4146	6.72517	9.27421	4.23544
AAAAG	A-rich_d1	-0.470747	-0.521421	-0.420072	0.714444	0.0589837	1.3699	-0.448475	-1.08605	0.189101	1.40996	-0.68245	3.50238	0.30944	0.095007	0.523873	0.467333	0.410604	0.524062	-1.8155	-0.815036	-4.91702	-6.56837	-2.6398	-2.46097	2.07798	1.03424	1.08194	-1.90879	0.427153	-5.37455	-3.02159	0.426116	4.98283	1.08429	2.49044	0.77944	8.88172	2.04604	0.303583	2.96103	3.59631	0.985748	5.11082	2.33481	5.12816	6.4737	6.48572	9.76187
AAAUU	A-rich_d2	0.15734	0.0890951	0.225584	2.49272	2.28092	2.70452	1.05921	0.742285	1.37614	3.44142	3.00078	3.88207	0.570875	0.466098	0.675653	0.639292	0.595226	0.683358	-21.3664	-11.1411	-3.25493	-11.6615	-10.4027	-8.19829	-7.49398	-0.92091	-0.796501	-2.00773	-6.18095	-5.63339	-9.02851	-4.74946	-7.62217	-0.917137	-7.52426	-4.51308	-1.54894	-7.40379	-6.4685	-0.0902824	-11.1699	-4.19899	-1.36731	-6.47129	-5.41536	-10.6593	-4.53157	-6.2237
AAGAA	A-rich_d1	-0.522938	-0.595063	-0.450813	1.43022	0.896427	1.96402	-0.812152	-1.20036	-0.423947	1.46946	0.883743	2.05517	0.145633	0.0296726	0.261593	0.375902	0.320518	0.431286	-4.23913	-1.43278	0.983057	2.90267	2.92952	-0.883558	5.84247	7.68638	2.77614	6.62454	4.96803	1.31199	1.09687	0.896446	7.42205	8.30238	12.2126	-1.06874	8.95432	6.17262	14.2688	10.4514	4.85243	1.29774	12.6751	5.40539	5.64268	9.50783	9.81166	8.79271
AAGUA	GUA_d0	-0.369695	-0.488024	-0.251366	0.477877	-0.20883	1.16458	-1.20659	-1.89601	-0.51717	2.82607	2.18529	3.46685	0.832098	0.691175	0.973022	1.19731	1.14452	1.25011	-1.93942	-4.80346	-1.59157	-1.84037	-9.25646	-10.844	-12.5424	-3.99133	-2.71294	-11.6287	-1.0314	-3.37836	-9.8914	-9.14499	-17.8	0	-3.80093	0	0	-4.53856	-17.1764	-8.02568	-3.19264	-6.5106	-7.77759	-3.68088	-14.8839	-7.35841	-1.38991	-3.8267
AAUAU	A-rich_d2	0.227192	0.106138	0.348247	3.6189	3.38731	3.85048	0.640441	0.350423	0.930459	2.38727	1.90587	2.86866	0.636142	0.440664	0.83162	0.425339	0.384981	0.465698	-9.9324	-15.655	-12.9898	-2.2503	-20.5476	-3.96675	-6.80687	-2.25135	-3.36112	-2.98609	0	-8.25351	-8.25075	-13.0308	-15.7885	0	-4.72751	0	-5.05557	-10.4638	-9.20343	-0.963007	0	-4.50743	-3.97311	-11.0657	-6.78586	0	-2.5217	-1.64826
AAUGA	A-rich_d2	0.117377	-0.0390773	0.273831	3.96391	3.73373	4.1941	0.279612	-0.649775	1.209	2.42905	1.856	3.0021	0.115185	-0.0244452	0.254816	0.126706	0.059927	0.193485	-4.16278	-11.1443	-2.56464	-15.4728	0.00190823	-5.87513	-3.75151	-2.98166	-1.24157	0.101331	0	-4.63322	-4.53136	-3.09813	-5.46344	-5.73353	-2.4322	-1.00704	-1.40693	-1.6718	-3.52634	-0.15946	-1.47901	-2.48487	-0.445973	-3.47554	0	-2.21924	-0.116436	-0.0691551
AAUUU	U-rich_d2	0.462194	0.404039	0.52035	2.8435	2.67013	3.01686	1.56438	1.37382	1.75494	4.47904	4.05801	4.90006	0.949052	0.819954	1.07815	0.708409	0.669466	0.747352	-5.15907	-15.6099	-13.8401	-3.31351	-15.1943	-4.07658	-5.95425	-4.64825	-2.43593	-3.99787	-5.12541	-6.23019	-12.1067	-0.929127	-10.46	-6.55164	-17.1587	-0.270668	-9.07347	-5.08882	-4.31859	-5.50267	-2.47975	-4.7987	-2.58106	-3.2313	-4.86926	-4.23243	-4.70041	-5.39175
AGAAG	A-rich_d2	-0.351685	-0.448284	-0.255085	0.0492324	-0.935095	1.03356	-1.30729	-1.83421	-0.780374	1.45903	-0.608084	3.52614	0.0289793	-0.103919	0.161877	0.307335	0.224095	0.390575	3.47789	5.52745	9.27532	5.26228	6.24097	5.03291	15.0136	4.22263	7.7688	4.12755	8.1685	6.6116	9.99752	0.980145	6.09976	6.62088	6.68365	17.3293	6.18898	8.23817	2.06808	12.1431	11.3724	10.373	2.78589	8.50592	4.14655	3.05964	5.29205	8.52232
AGUAA	GUA_d0	0.100139	-0.113971	0.314249	2.38647	1.90081	2.87213	-1.90101	-2.43875	-1.36327	2.70424	2.02635	3.38214	0.908013	0.77001	1.04602	1.25881	1.20947	1.30814	-12.0367	0	0	-9.4636	-5.06177	-11.4629	-2.62067	-6.47016	-8.03307	-7.33769	-10.3118	-7.13759	-15.9472	-8.7598	0	-12.3131	0	-8.76567	-4.01285	-3.27354	-3.23563	-7.55899	-2.94797	0	-19.3258	-2.4986	-1.50022	-6.64707	-0.805666	-3.75602
AGUAG	GUA-UAG_d0	0.088793	-0.125659	0.303245	0.189828	-0.512559	0.892215	-1.74672	-2.16443	-1.32901	1.89591	0.398627	3.3932	1.04958	0.847324	1.25184	1.38074	1.3217	1.43978	-2.44495	0	0	-5.47602	0	-6.62187	-1.81034	-5.42378	0	0	-5.73737	-8.97888	0	-6.6059	-3.26714	-1.95753	-10.6165	-9.48118	0	0	0	0	-8.88992	-5.48353	0	0	0	-4.01026	-6.99683	-6.29245
AGUUU	U-rich_d2	0.836559	0.759093	0.914026	1.60672	1.3806	1.83284	1.14454	0.968229	1.32086	3.11765	2.54329	3.69201	0.832058	0.708551	0.955566	0.665683	0.617265	0.7141	-3.92115	-0.35978	0.664361	1.18321	1.31324	-5.79808	-3.37188	-2.21815	2.78701	0.843799	2.79184	-2.69255	0.399009	-1.23374	0.181478	0.0863064	1.5634	-7.64027	1.43188	-1.47447	3.06386	-2.15484	0.209182	-1.1252	-0.0233814	-1.68565	1.1122	0.151584	1.75475	-1.02819
AUAUU	U-rich_d2	0.498311	0.427243	0.569379	2.71771	2.53833	2.8971	1.23595	1.0617	1.4102	3.50031	3.18541	3.81521	0.762504	0.667392	0.857616	0.587589	0.551761	0.623416	-8.95829	-3.25966	-6.44572	-8.36265	-9.02708	-17.9888	-1.56919	-5.39736	-5.6455	-4.23024	-3.63641	-6.32574	-9.11792	-4.97255	-12.4859	-9.79626	-4.04103	-9.5558	-2.5246	-1.08542	-6.99767	-3.87036	-0.705067	-4.65597	-4.18826	-4.08776	-6.15301	-6.12494	-9.59496	-7.32197
AUGAA	A-rich_d2	-0.0876921	-0.197353	0.0219685	3.62271	3.3748	3.87062	0.255928	-0.218805	0.730661	2.50429	2.09763	2.91096	0.244478	0.112091	0.376865	0.1434	0.0920643	0.194736	-1.38326	-3.50388	-11.4666	1.81808	5.28399	-1.03621	-3.75961	-2.06314	-3.2746	-0.879448	2.97268	1.28564	0.605387	-2.08962	0.214005	-1.3107	0.363283	-2.28354	1.22617	3.64514	1.74384	2.70635	-0.797954	-4.72721	4.34773	2.30639	-0.72067	0.442578	4.08915	-0.398612
AUGUA	GUA_d0	-0.175426	-0.299767	-0.0510841	1.24309	0.877413	1.60877	0.0256486	-0.424894	0.476191	2.48297	1.89674	3.0692	1.35837	1.24157	1.47516	1.28871	1.237	1.34043	-2.74688	-4.08364	-3.19905	-8.28078	-3.04104	-10.1161	-4.44866	-4.11026	0	-8.31699	-2.84377	-3.94882	-15.2263	-6.92775	-3.35214	0	-3.25008	-5.19692	-8.02977	0	0	0	-4.87926	-3.48755	-6.27249	-14.932	-0.61537	0	0	-2.40929
AUUUA	U-rich_d2	0.697029	0.62444	0.769618	2.91674	2.7129	3.12057	1.16262	0.979834	1.3454	3.94357	3.61282	4.27433	0.931885	0.798621	1.06515	0.593651	0.565765	0.621537	-7.99548	-10.9687	-14.8711	-6.3658	-7.61252	-6.92847	-6.62975	-19.0107	-3.79102	-4.40724	-8.26743	-7.50868	-1.70656	-4.82609	-9.16775	-5.25916	-3.60183	-13.4642	-1.28051	-2.82583	-3.76571	-8.80413	-6.02314	-8.75556	-2.69958	-3.65197	-7.47653	-9.08296	-7.79223	0
AUUUU	U-rich_d1	0.531002	0.490546	0.571457	1.82675	1.71617	1.93732	2.06807	1.97584	2.1603	4.41111	4.12188	4.70034	1.43386	1.30216	1.56556	0.615855	0.595161	0.636549	-10.4032	-2.47814	-5.47745	-8.0344	-3.04864	-18.0126	-4.88754	1.93762	1.72475	-0.0116369	-9.49453	-19.1432	-15.1838	-12.8364	-4.90266	-6.15565	-3.05499	-6.35287	-5.56549	1.50961	-3.39866	-2.41926	3.65368	2.9941	3.91997	4.1967	2.63206	-1.15957	-0.211039	-7.46843
CAUUU	U-rich_d2	0.302542	0.262898	0.342187	0.982446	0.846776	1.11812	1.58027	1.47855	1.68199	3.87809	3.55187	4.20432	0.912377	0.777848	1.04691	0.349454	0.325068	0.37384	-3.28186	-1.75856	0.863056	-0.94008	-8.12495	-4.86714	0.0977341	2.5191	0.273506	0.766157	-8.50233	-5.29241	-1.18716	3.78222	-2.55493	-0.21675	1.95637	2.83412	0.819588	0.920713	-4.66366	1.84921	1.70641	1.09607	5.19828	-1.00784	1.80585	1.39436	0.72111	-0.525123
CUUUA	U-rich_d2	0.554123	0.498988	0.609258	1.09518	0.774986	1.41537	1.05374	0.843383	1.2641	4.8321	4.4154	5.24881	0.846469	0.726867	0.96607	0.393394	0.365559	0.421228	-0.708647	-8.1472	-4.33195	-2.81681	0.478797	1.13049	-2.90455	-7.09797	1.06281	1.38941	-1.54494	-1.39754	-1.70538	-1.57297	-0.611721	-3.41184	-8.2762	1.18453	-6.21824	-0.220494	0.518273	0.26277	-0.155778	2.75718	-1.64851	-1.33485	1.17972	-0.305762	-0.715678	-1.02809
CUUUU	U-rich_d1	0.567556	0.53979	0.595323	0.676041	0.554172	0.79791	2.00341	1.91451	2.0923	2.14418	1.96052	2.32785	1.33709	1.20918	1.465	0.356393	0.330901	0.381885	1.83928	1.54992	5.91754	7.51871	7.64701	7.22708	3.58744	10.9568	6.50007	2.75435	3.81634	1.8107	-2.32221	10.1076	0.0502416	2.96192	10.2932	10.1513	5.33303	9.18218	4.15873	7.3746	8.98794	8.65171	13.3846	7.07172	8.42098	11.7275	3.85319	4.56023
GAAAA	A-rich_d1	-0.405882	-0.469317	-0.342447	1.98147	1.68282	2.28013	-0.709853	-1.18122	-0.238487	2.40253	1.5039	3.30116	-0.0154869	-0.118126	0.0871523	0.317294	0.287013	0.347574	-7.79898	-13.5074	-6.41666	-2.27098	-1.61271	0.178699	6.11344	-0.484291	2.17465	-2.94721	-6.03096	-3.17053	-0.617871	2.37677	3.3528	0.444184	3.07049	9.01524	6.75796	0.41544	4.26124	10.6706	1.21063	0.15033	5.27559	3.637	16.5581	10.1456	4.23148	2.57662
GAAGA	A-rich_d2	-0.340193	-0.413679	-0.266708	-0.114744	-0.392357	0.162869	-1.22775	-1.71607	-0.739428	0.791292	-0.415346	1.99793	-0.1041	-0.213225	0.00502396	0.0165248	-0.0194849	0.0525346	5.48663	2.21106	4.4969	13.7592	15.6245	12.8771	15.3651	15.5017	16.021	15.2287	9.18621	3.05485	10.962	15.3412	19.2308	22.3529	9.99583	9.81717	7.7867	24.52	11.143	17.5113	10.5562	15.1144	10.8628	4.24547	8.53173	13.8864	5.43552	16.1851
GCUGC	NA	0.0594778	-0.00239541	0.121351	-0.534723	-0.877313	-0.192133	-0.434156	-1.32006	0.45175	0.128116	0.0495156	0.206716	-0.00627066	-0.243373	0.230832	-0.0710405	-0.143747	0.00166628	6.99005	4.41497	21.9285	8.0034	6.96197	25.2104	7.71203	3.61499	12.8672	6.51276	5.64886	7.82404	5.96652	10.9382	7.66278	12.5948	6.25789	2.721	4.68968	10.654	7.02368	1.03514	7.08503	3.42031	5.56129	5.7865	1.89228	3.54667	3.58508	5.54049
GGUUU	U-rich_d2	0.680872	0.640333	0.721411	0.434373	0.262972	0.605774	1.07175	0.93676	1.20674	0.931959	0.675684	1.18823	0.484177	0.391606	0.576749	0.191651	0.158559	0.224744	1.20521	4.21126	3.88116	5.60686	2.50966	10.0146	4.29492	1.79713	3.97182	8.74809	0.611836	1.40121	3.51929	2.51949	3.81808	6.626	2.0077	8.33107	1.2798	5.16708	4.54789	0	6.98168	18.1985	2.62235	1.98442	7.24041	1.78952	4.87084	2.72973
GUAAA	GUA_d0	-0.206576	-0.398525	-0.0146276	1.92042	1.3217	2.51915	-1.50727	-1.9096	-1.10493	3.05228	2.17679	3.92778	1.01495	0.876457	1.15345	1.39693	1.34801	1.44584	-5.883	-10.2025	-5.03457	-3.94664	-6.84495	-8.16162	-1.74184	-3.96133	-9.10775	-9.24486	-8.64051	-6.69875	-1.73701	-2.45668	-7.82705	-5.3911	-3.19596	-3.0208	-12.0029	-2.07606	-9.18369	-8.64053	-4.76415	-0.627474	-4.53668	-11.9283	0	-5.78031	0	-1.57709
GUAGU	GUA-UAG_d0	0.159661	0.00814197	0.31118	0.516381	-0.0496427	1.08241	-1.18563	-1.46297	-0.908296	2.36832	0.714179	4.02246	1.21513	1.01861	1.41164	1.53959	1.48167	1.59751	0	-4.20625	-2.9104	-9.54565	0	0	-0.398625	-3.92296	-11.3655	0	-6.47933	0	0	-3.0126	-10.8753	-9.80023	-8.86833	-1.98277	0	0	-11.2055	-3.84572	-1.51555	0	0	-4.0372	0	-11.7101	0	0
GUAUU	GUA_d0	0.0774622	-0.00453445	0.159459	0.878354	0.633014	1.12369	0.16622	0.0106412	0.321798	2.22715	1.6001	2.8542	0.990024	0.910094	1.06995	1.04346	1.01532	1.0716	-3.7422	-2.48166	-1.53084	-3.11372	-7.39926	-12.9902	-6.63743	0.404186	-6.80595	-9.77484	-12.818	-17.6323	-4.51427	-0.56526	-8.2578	-10.5748	-6.7934	-2.38107	-3.83945	-6.64399	-8.5281	-2.79066	-3.47059	-9.20274	-7.99395	-3.21414	-1.87245	0	-6.06273	-1.23474
GUUUA	U-rich_d2	0.78562	0.720414	0.850825	1.74109	1.47061	2.01157	1.17967	0.976881	1.38246	3.75897	3.30108	4.21686	0.886228	0.795316	0.97714	0.527941	0.493538	0.562344	-6.11629	-10.8885	-3.80299	-1.32769	3.76093	-1.08426	-3.96541	-3.80917	0.0334016	-2.03009	0.202046	-0.445102	-1.60114	-0.973026	-1.74213	-0.535541	-0.472855	0	-3.51603	0	0	0.395477	0.782304	0.452666	0.6302	-2.11743	-0.459434	-0.224384	0.866907	0.0345777
GUUUU	U-rich_d1	0.695837	0.655845	0.73583	1.02824	0.882646	1.17384	1.81874	1.7214	1.91609	1.34768	1.10596	1.58939	1.10427	1.0247	1.18383	0.51811	0.495511	0.54071	1.40288	-0.753423	3.51752	-0.381861	0.287683	3.7516	2.65011	6.60195	-0.106689	11.832	2.72542	5.49215	-1.80824	1.46565	0.773457	6.61534	2.82582	0.615002	11.6198	6.23679	0.423459	4.81576	9.39751	3.26837	17.2387	4.83797	8.05482	6.8166	2.33091	2.86944
UAAAA	A-rich_d1	-0.259605	-0.328798	-0.190411	2.08109	1.77987	2.38231	-0.131185	-0.357996	0.0956262	3.00439	2.36282	3.64596	0.739136	0.615246	0.863027	1.00678	0.948278	1.06529	-7.86007	-9.79665	-25.3401	-14.4178	-16.9854	-15.4671	-7.15047	-4.68604	-13.8578	-12.8622	-11.8378	-11.0761	-9.0547	-10.7493	-7.31937	-16.2735	-5.48158	-2.28815	-5.43942	-8.82523	-11.1058	-6.68511	-3.31017	-10.4986	-7.2435	-3.88894	-9.03431	-11.868	-9.17565	-7.73724
UAAAU	A-rich_d2	0.406164	0.265983	0.546345	3.23702	2.95524	3.5188	0.206907	-0.0243554	0.43817	3.5341	2.96501	4.10319	0.703609	0.541753	0.865466	1.01521	0.948366	1.08205	-7.54921	-7.72669	-9.76645	-3.61399	-1.75735	-5.66517	0	-5.6692	-4.54049	-12.173	-13.0688	-7.66863	-4.54345	-4.48973	-2.49743	-13.4696	-8.79615	-5.29378	-2.51898	-19.866	-0.547071	-10.1808	-5.31572	-7.6009	-8.58058	-8.97626	-16.6528	-3.51813	-6.20917	-9.06664
UAAUA	A-rich_d2	0.763094	0.547778	0.978411	4.72431	4.45693	4.99169	-0.0220614	-0.503689	0.459566	2.67594	2.06971	3.28218	0.770865	0.448627	1.0931	0.788831	0.68688	0.890781	-9.73855	-17.5363	-5.01463	-13.1028	-11.0232	-4.75067	-2.22915	-14.6852	0	0	-12.5332	0	-3.82828	-10.4934	-2.89073	-8.49644	0	-5.20718	-4.62596	-4.52749	-2.42751	0	-4.15258	-7.3953	0	0	0	-8.53317	0.200486	-2.74773
UAAUU	U-rich_d2	0.554247	0.465329	0.643165	3.20547	2.9947	3.41625	0.714397	0.549991	0.878803	4.21106	3.69776	4.72436	0.766172	0.632145	0.900199	0.948838	0.88697	1.01071	-13.5448	-22.183	-9.61089	-19.81	-15.7977	-2.33628	-4.58692	-5.21942	-3.16432	-6.2437	0.138712	-10.1459	-10.4724	-12.4481	-12.5141	-24.3485	-3.75831	-19.1558	-7.52494	-6.60795	-3.75606	-7.25472	-3.32359	-3.62055	-3.406	-6.43798	-1.63116	-5.70169	-5.27857	-18.1627
UAGAU	UAG_d0	0.977376	0.858571	1.09618	2.27968	1.93474	2.62461	0.157969	-0.28548	0.601419	3.09109	2.41668	3.76551	0.409867	0.163125	0.656609	0.914513	0.820011	1.00902	-1.82514	0	-1.36277	0	-0.819061	-1.9598	0	-1.8387	-4.79981	-2.68486	-5.45543	-2.54566	-3.34276	-4.24912	-5.30688	-6.25363	-7.05885	-3.28633	-7.09855	-5.04416	0	-3.76301	-6.27762	-5.61756	-9.48104	0	0	-3.98571	-10.5833	-21.7028
UAGUA	GUA-UAG_d0	0.516144	0.354736	0.677551	2.03462	1.56852	2.50072	-0.877562	-1.32845	-0.426676	1.76037	1.05391	2.46682	1.04091	0.879506	1.20231	1.37231	1.31091	1.43372	-2.07667	0	-3.48633	-4.96217	-16.0264	-4.20928	-5.41682	-3.66266	-9.04577	-17.4949	-6.24092	-8.31634	-8.86943	-7.18288	-6.0231	-8.98422	-5.66526	-6.47641	-7.15822	-8.26563	0	-11.8883	-5.01981	0	0	-5.48188	-5.96471	-5.17867	-17.5481	-1.43988
UAGUU	UAG_d0	1.21616	1.10516	1.32717	2.31709	2.07934	2.55483	0.316179	0.120375	0.511983	3.23482	2.75083	3.7188	0.676613	0.548819	0.804406	0.985197	0.919022	1.05137	-0.761001	-1.04968	-4.06954	-7.60835	-3.21483	-4.93336	-6.46616	-1.38526	-5.41202	-1.74366	-2.54467	-1.59697	0	-1.75001	-3.94511	-2.24264	-10.8994	-6.60676	-4.75039	0	-5.82187	-8.7156	-3.91759	-4.36487	0	0	0	0	-3.46908	-5.28108
UAUAG	UAG_d0	0.98032	0.844734	1.11591	2.05757	1.84407	2.27106	-0.225759	-0.669619	0.2181	2.03602	1.32629	2.74574	0.614688	0.439573	0.789803	0.847095	0.775324	0.918866	0	-5.64366	-10.2086	0	-3.64803	-2.55294	-5.07669	0.513799	0	-4.42545	-7.5393	-1.88613	-1.31819	-11.6205	-3.5542	0	-4.20966	0	-18.3564	-5.80848	-5.68387	-4.33025	-10.7556	-5.67363	-1.54438	-2.9416	0	-10.8405	-5.36968	0
UAUAU	U-rich_d2	0.409199	0.335093	0.483306	2.50102	2.28375	2.71828	0.834268	0.700766	0.96777	3.21755	2.8953	3.5398	0.882336	0.776861	0.987812	0.715017	0.674937	0.755096	-3.74137	-5.4372	-15.0432	-23.5903	-25.4312	-11.0416	-14.5064	-14.4293	-3.83814	-3.97935	-10.9575	-12.8484	0	-9.79248	-10.9348	-3.91	-10.7557	-3.43608	-11.9584	-8.13305	-9.98247	-5.51676	-6.75577	-4.03793	-4.56941	-12.0844	-9.65237	-5.7029	-4.68178	-5.54347
UAUUA	U-rich_d2	0.541266	0.447524	0.635007	2.85516	2.61452	3.0958	0.869444	0.714887	1.024	2.46564	2.11402	2.81726	0.736558	0.643774	0.829343	0.616305	0.578321	0.654289	-5.60064	-0.84081	-15.6029	-10.2213	-8.48896	-3.39046	-4.74678	-1.25519	-4.41741	-2.15013	-13.0892	-18.3297	-13.8982	-7.23847	-11.3476	-13.5343	-11.0056	-6.67405	-8.87725	-4.29658	-6.82177	-9.02042	-6.06278	-5.41787	-10.2525	-7.99061	-10.0101	-4.01173	-4.41044	-2.75472
UAUUU	U-rich_d1	0.594046	0.543035	0.645058	1.75935	1.62566	1.89304	1.69659	1.6079	1.78527	4.38483	4.1182	4.65145	1.06438	0.987895	1.14087	0.734626	0.705447	0.763806	-4.28702	-9.68417	-5.79391	-5.65713	-9.23031	-9.20977	-17.7474	-13.931	1.2438	-7.31415	-23.9705	-10.31	-16.0372	-11.6208	-5.20365	-7.16324	-14.3941	-6.55869	-2.91722	-0.828356	-2.22999	-3.12258	-3.89399	1.5766	-5.58116	-4.51093	-5.13668	-2.65289	-2.94152	-10.1291
UCAUU	U-rich_d2	0.233197	0.192293	0.274102	1.04028	0.904942	1.17561	1.40289	1.30323	1.50254	3.54232	3.16692	3.91772	0.849046	0.720716	0.977375	0.304384	0.281101	0.327667	-2.58321	-1.01334	0.585867	-7.4724	-3.80122	-2.7989	1.92101	-2.27479	-0.936326	-7.30275	-2.54618	-4.07378	-0.538741	-5.77348	1.38627	-3.68242	0.662868	-0.0129112	-0.0823117	-2.68918	-0.346555	3.53296	1.065	-3.33966	3.72766	1.28994	1.34901	0.887083	2.2541	-0.804827
UCUUU	U-rich_d1	0.518027	0.486616	0.549437	0.602212	0.450127	0.754297	1.92712	1.83469	2.01955	1.97881	1.78886	2.16876	1.19452	1.07136	1.31768	0.360689	0.336996	0.384381	3.79614	3.67096	7.40775	7.55984	7.06589	2.70297	3.82826	7.28466	4.34769	2.49398	1.8871	4.46621	0.925617	-0.789945	-1.27531	6.42799	10.303	4.7909	6.52702	6.7209	13.827	7.86395	13.2272	13.2419	3.90149	4.92045	9.19864	7.08041	3.47649	1.15058
UGAAG	A-rich_d3	-0.196852	-0.247064	-0.146641	0.48833	-0.00932026	0.98598	-0.165474	-0.470959	0.14001	1.31928	-0.677973	3.31653	0.118289	-0.0861952	0.322773	0.221504	0.175113	0.267896	4.3401	7.25646	17.2785	9.02438	4.71823	27.5284	21.1641	9.72418	12.8878	3.02434	8.34837	16.4687	24.7702	12.7153	12.4945	6.05241	7.32718	7.00875	14.7476	10.1313	27.837	13.6799	12.2638	11.5878	3.50552	12.8099	18.082	4.92815	11.3778	14.3084
UGAUG	NA	-0.0363429	-0.0767913	0.00410553	0.208573	-0.0409036	0.458049	0.0131583	-0.193456	0.219772	0.846045	-1.13722	2.82931	0.376031	0.197523	0.554539	0.163579	0.103241	0.223917	9.49062	13.4705	3.91401	5.49806	6.68028	4.09171	11.6199	5.62947	12.428	5.64249	5.87262	11.2287	17.1067	9.18695	14.9717	5.76278	4.47673	6.91138	10.2843	4.47584	2.72167	6.21426	9.98524	15.8497	14.7946	4.43209	8.03342	9.74727	1.11929	5.65069
UGCUG	NA	0.151461	0.0963182	0.206603	-0.251587	-0.611523	0.10835	0.0423328	-0.254963	0.339629	-0.320382	-0.443901	-0.196863	0.497851	0.30739	0.688312	0.133465	0.0502887	0.216642	5.32343	7.86972	14.617	5.54106	23.5862	10.2793	3.82216	23.4234	13.9865	17.0586	12.2651	15.3871	6.73184	5.46392	10.0389	7.10599	7.28025	24.4906	12.879	9.2909	10.3961	18.1986	8.08646	10.2765	4.19561	5.81871	9.14458	5.66718	8.67903	8.44929
UGGUG	NA	0.1233	0.0570293	0.18957	0.1471	-0.305804	0.600004	0.296652	-0.0599774	0.653282	-0.218373	-0.686054	0.249307	0.318471	0.0990632	0.537879	0.0756416	-0.0194824	0.170766	5.07968	5.4152	14.4638	7.48695	14.4058	14.8376	9.33654	5.24478	5.74644	15.5669	8.62825	16.3597	8.53546	7.03754	7.8592	6.57281	14.936	17.5229	7.81683	8.69874	8.09835	11.3811	6.29269	6.89695	6.64454	3.53782	5.62117	12.6933	13.6456	0
UGUAA	GUA_d0	-0.554876	-0.67681	-0.432943	1.06679	0.583803	1.54977	-0.435488	-0.844073	-0.0269035	3.23873	2.71864	3.75882	1.52762	1.42575	1.62949	1.59242	1.557	1.62784	-2.86703	-7.09221	-8.61441	-3.33488	-14.6654	-1.16328	-2.48571	-5.13417	-2.66569	-0.309812	-5.58062	-6.9687	-6.84197	-11.3036	-3.83277	-8.14726	-2.8728	-9.23501	-4.83864	-5.04499	-7.79617	-5.47258	0	-1.9572	-3.70654	-4.1944	-8.88583	-10.5792	-2.40513	0
UGUAG	GUA-UAG_d0	-0.00515004	-0.123973	0.113673	-0.0723254	-0.503951	0.3593	-0.81821	-1.26839	-0.368027	0.757092	-8.08047	9.59465	1.49062	1.36051	1.62073	1.6175	1.56947	1.66553	-1.86074	0	-8.14643	0	-0.911137	0	-3.16669	-7.09129	0	0	0	-2.07066	-4.57472	-11.3363	-3.50303	-3.58927	-3.51528	0	-6.14928	-13.6086	-3.95008	-2.0228	-2.95853	-4.5639	-3.64189	0	-7.40629	-11.0078	0	-4.08261
UGUAU	GUA_d0	-0.0356605	-0.130823	0.0595019	0.840009	0.507225	1.17279	0.227626	0.00231268	0.45294	2.64355	2.10308	3.18402	1.33647	1.25778	1.41516	1.22528	1.19161	1.25896	-4.82453	-5.38056	-2.7336	-6.57132	-4.76766	-6.40603	-3.65409	-5.07733	-4.41337	-8.74057	-5.21736	-1.47004	-2.01747	-4.71051	-6.66258	-3.17095	-2.98292	0	-5.9908	-4.67518	-7.08554	-2.84368	-4.06892	-0.767567	-1.53614	-3.25858	-2.12961	-1.27968	0	-4.84076
UGUUU	U-rich_d1	0.550231	0.5176	0.582861	0.865064	0.721876	1.00825	1.78716	1.6957	1.87861	1.25962	1.12023	1.39902	1.14897	1.07284	1.2251	0.531189	0.50927	0.553108	-0.809141	1.79946	5.00683	4.7931	3.92894	0.643543	2.46127	3.10923	5.53292	2.32956	9.83717	2.05198	0.72378	1.88201	4.31832	3.89398	5.61598	5.84534	2.98898	4.44293	12.1193	9.32677	6.8098	4.62576	4.38914	5.96732	8.95039	5.51857	1.72584	2.6597
UUAAU	U-rich_d2	0.685662	0.583063	0.788261	3.8267	3.63521	4.01819	0.710577	0.554737	0.866417	4.39438	3.88927	4.89949	0.728407	0.625057	0.831757	0.433959	0.401887	0.46603	-12.1451	-11.5216	-22.5639	-13.0578	-8.086	-5.33475	-6.34474	-7.00055	-19.7906	-8.01472	-6.95879	-5.1848	-5.87471	-10.5189	-13.3091	-11.0088	-1.60859	-4.77749	-4.85137	-4.90127	-16.7051	-2.31603	-6.59225	-3.76214	-0.754223	-2.88302	-6.17129	-7.15734	-18.7063	-10.6812
UUAGA	UAG_d0	0.972088	0.876849	1.06733	1.76919	1.47937	2.059	0.0551052	-0.196577	0.306787	3.38648	2.9944	3.77855	0.491518	0.29686	0.686175	0.4934	0.464027	0.522774	-1.95816	-5.12063	0	-11.2385	-6.24248	-3.86767	-4.31616	-2.81481	-2.56476	-1.81008	-2.8605	0.825083	-0.366166	-8.50517	0	-5.62088	-8.34787	-3.83173	-5.04017	-3.80803	-4.52307	-4.3026	-2.15905	-0.619506	-5.01059	-1.20499	-1.48921	-4.88915	-8.14468	-5.11056
UUAGU	UAG_d0	1.13641	1.04393	1.22889	1.92967	1.69188	2.16745	0.339521	0.121239	0.557802	2.68582	2.12093	3.2507	0.802005	0.651375	0.952634	0.847856	0.794292	0.901421	-5.29389	-6.60334	-5.33273	-5.48535	-6.56703	-0.758699	-2.6713	-5.83777	-7.57825	-1.18454	0	-10.4459	-4.63912	-1.01487	-0.823114	-6.9013	-3.33769	-2.42667	-4.04812	-6.00064	-6.39611	-6.13562	-1.39397	-4.76035	0	-5.7254	0	-10.0885	-5.39143	-4.66173
UUAUA	U-rich_d2	0.790051	0.688015	0.892087	2.48684	2.2736	2.70009	0.851105	0.691051	1.01116	3.70362	3.40014	4.0071	0.952777	0.804939	1.10062	0.596849	0.56689	0.626808	-6.49638	-16.8628	-4.02306	-14.8702	-7.51197	-13.3128	-7.00042	-3.62226	-9.46411	-8.68935	-6.10702	-6.34144	-24.5243	-6.18983	-7.58617	-8.05028	-2.76564	-14.8923	-9.42304	-5.97529	-2.86149	-5.85246	-0.977504	-3.55254	-5.80399	-12.7528	-7.03514	-4.76041	-2.34907	-5.2793
UUAUU	U-rich_d1	0.592427	0.544262	0.640592	2.02056	1.90266	2.13847	1.6341	1.56018	1.70803	4.26632	3.93478	4.59786	1.10373	1.00984	1.19761	0.553289	0.532338	0.57424	-6.05412	-10.7751	-8.11041	-11.7472	-5.61737	-1.38548	-3.97327	-3.3818	-5.46158	-17.2983	-14.1206	-6.45689	-7.50759	-7.72124	-10.0239	-11.5861	-8.91736	-8.90349	-2.86462	-1.33561	-1.43395	-2.88687	-1.66046	-2.32469	-2.67322	-6.91887	0.323917	-1.97143	-0.150263	-5.5982
UUCUU	U-rich_d1	0.575917	0.538024	0.613809	0.73744	0.618367	0.856512	1.99726	1.90644	2.08809	1.93338	1.67686	2.1899	1.16141	1.05398	1.26883	0.313295	0.287966	0.338623	2.38663	5.80937	4.7111	3.41234	2.81044	0.0608646	2.55647	3.04676	1.72848	2.85112	13.3403	11.1796	-0.768761	2.10443	6.05353	7.63149	2.02536	1.73337	5.55941	10.5506	5.07272	11.6896	9.4042	3.86182	7.3898	8.00624	4.68791	10.7144	5.51585	3.69985
UUGCU	U-rich_d2	0.436269	0.401865	0.470673	0.0799168	-0.109858	0.269691	1.0878	0.956325	1.21928	0.753353	0.488137	1.01857	0.787429	0.677418	0.897439	0.237507	0.210874	0.264141	3.81452	8.10303	8.64977	9.85236	8.13201	3.17903	9.90292	3.98589	6.82363	6.45409	8.2425	15.0896	9.22868	7.80249	4.62588	4.13813	8.94632	11.3335	3.95618	6.44245	2.45841	8.60457	5.85294	8.29811	5.94275	6.69228	3.68479	9.95354	2.34047	6.8617
UUGUA	GUA_d0	-0.02812	-0.105913	0.0496731	0.538918	0.278807	0.799029	0.0864092	-0.215318	0.388136	2.79291	2.25325	3.33257	1.72423	1.62979	1.81867	1.50087	1.46607	1.53567	-5.10067	-8.92713	-5.21385	-6.6218	-2.50589	-1.04886	-11.2646	-3.36374	-3.42707	-2.13527	-2.98314	-3.12126	-10.9712	-12.3024	-3.58659	-4.24467	-4.27114	-7.12346	-6.90083	-7.47105	-2.41252	-2.92866	-5.65963	-5.00551	-1.45537	0	-6.35573	-0.93289	-5.79791	-0.914321
UUGUU	U-rich_d1	0.593234	0.5566	0.629869	0.82944	0.713774	0.945105	1.6794	1.57528	1.78352	1.26277	1.02171	1.50383	1.30362	1.20977	1.39748	0.54503	0.521014	0.569045	2.28028	-2.13283	4.40503	3.7496	4.07353	1.1616	1.83974	5.24876	3.00632	4.7797	8.81461	1.73295	0.723414	4.46779	2.07106	4.00474	4.43364	4.40858	6.72856	7.49817	7.73378	6.45351	6.26712	9.95791	7.7681	10.305	4.19624	9.03162	3.66582	1.30222
UUUAA	U-rich_d2	0.533061	0.454601	0.611522	2.98461	2.72839	3.24082	0.79599	0.643381	0.9486	4.31861	3.91596	4.72127	1.06007	0.963304	1.15683	0.654457	0.627747	0.681168	-14.7861	-22.7653	-20.4675	-6.85273	-6.26138	-8.04979	-9.42866	-20.3274	-8.6674	-9.23752	0.413577	-0.678727	-3.80167	-13.1133	-7.58046	-3.51054	-11.2403	-6.45317	0.145311	-17.2723	-0.741864	-4.47995	-3.8841	-4.0788	-2.21201	-1.6336	-1.7143	-7.72618	-5.865	-1.19309
UUUAC	U-rich_d2	0.553556	0.514716	0.592397	1.27012	1.11358	1.42666	1.94718	1.77148	2.12288	3.53888	3.15052	3.92723	0.960883	0.805768	1.116	0.195499	0.172259	0.21874	-1.42087	-1.81862	-5.36626	-0.508084	-0.201511	-0.673677	-2.20672	-1.57191	-10.4736	0.0964769	0.502456	0.189813	-2.77317	-3.31102	-1.09262	-0.926937	-2.80957	-4.02652	-1.31198	0.83428	0.75045	1.35033	0.974025	-1.01083	3.1544	-0.512607	0.172315	4.25941	2.2723	0.523538
UUUAG	UAG_d0	1.07702	1.00905	1.14498	1.68629	1.48104	1.89154	0.592853	0.392133	0.793573	2.95938	2.27793	3.64084	1.04101	0.921152	1.16086	0.678741	0.646877	0.710605	-3.04048	-6.4943	-8.18068	-6.77768	-4.2019	-4.70051	-0.00377891	-6.47556	-1.86936	-2.28816	-4.13302	-2.41811	0	-1.24259	-5.68179	-4.49474	-2.06963	-4.39162	-6.88978	-3.70345	-3.68153	0	-5.37407	-1.36552	-5.33159	-3.1859	-2.66117	-2.65246	-4.23718	-3.27409
UUUAU	U-rich_d1	0.601158	0.553585	0.648731	2.11554	1.96788	2.26319	1.70586	1.60766	1.80406	4.33392	4.03204	4.6358	1.34485	1.2441	1.44561	0.580174	0.557928	0.602419	-8.98546	-7.09133	-21.9596	-15.4154	-2.61569	0.680923	-4.73748	-7.51856	-22.9513	0.146807	-1.0252	-14.2069	-5.92808	-1.28486	-17.2194	-3.89674	-7.80303	-2.57275	-1.34658	-0.619741	1.08869	-0.945687	-1.64524	-2.12013	2.22095	-3.90005	-3.82348	-0.454732	0.886736	1.3594
UUUCA	U-rich_d2	0.270685	0.230329	0.311041	1.38369	1.15834	1.60905	1.88139	1.73341	2.02937	4.3144	3.8985	4.7303	1.11083	0.985376	1.23629	0.320654	0.295051	0.346257	-0.940773	-6.99861	-0.438325	0.586684	0.962138	-0.312786	-1.4786	-5.40172	-4.88616	2.76597	1.49947	2.63353	-0.976246	0.454552	-1.24782	1.59167	-3.55502	-0.832119	0.168839	0.96155	0.297512	0.349062	-0.597457	1.9978	3.21426	2.56794	5.71152	2.92182	3.8099	4.74589
UUUCU	U-rich_d1	0.559698	0.523704	0.595692	0.860762	0.720119	1.0014	2.03177	1.94858	2.11496	1.65503	1.43108	1.87897	1.21877	1.09487	1.34267	0.316898	0.292685	0.341112	1.38943	1.44485	3.14448	4.26341	4.40464	-1.18012	3.43775	1.36398	3.1601	8.98785	14.4567	4.46697	3.4293	-1.05342	1.2959	-0.227846	3.49031	1.58674	5.64614	11.0711	4.28374	9.12889	6.23105	8.0988	8.88168	13.4874	8.336	9.77429	4.28097	8.59292
UUUGC	U-rich_d2	0.329953	0.300245	0.35966	0.258757	0.0772978	0.440216	1.42544	1.28929	1.56159	0.806121	0.506428	1.10581	1.01149	0.862093	1.16088	0.277754	0.245212	0.310296	6.57784	5.29521	10.4419	5.74757	6.61488	6.11908	1.78209	7.71998	6.94018	9.33433	4.87032	12.12	4.11831	8.86594	0.484741	1.84169	3.8511	8.1467	7.98622	-0.116912	0.0282677	3.15661	9.07251	8.31012	8.76254	5.92839	6.03396	2.86879	1.53146	2.88309
UUUGG	U-rich_d2	0.457137	0.430426	0.483847	0.0712581	-0.0898598	0.232376	0.792729	0.664702	0.920755	0.277398	0.000611498	0.554184	0.976875	0.845342	1.10841	0.161302	0.122721	0.199882	4.57332	4.16546	12.8178	14.4109	4.20894	9.15726	8.13567	7.32175	5.40004	5.53788	11.9798	7.67519	8.38051	5.92286	7.07499	6.21653	6.37163	15.9512	18.438	7.66903	4.68221	10.4589	9.87349	6.48918	8.65135	12.8621	25.9537	7.43503	2.22003	5.70296
UUUGU	U-rich_d1	0.440077	0.402997	0.477158	0.635068	0.526393	0.743743	1.52877	1.41306	1.64448	1.16953	0.988513	1.35055	1.68241	1.58315	1.78168	1.02901	0.981215	1.0768	-1.05549	-1.55449	-1.1085	1.28665	1.55044	-3.74637	2.43324	1.14346	5.3434	6.32135	1.1515	-0.53111	-1.49616	-0.746533	-1.54117	4.4969	5.01211	1.23356	4.77874	4.54046	0.845411	2.48664	5.48854	7.18936	8.98622	-0.275612	2.29483	5.89016	5.92928	1.73282
UUUUA	U-rich_d1	0.748257	0.69733	0.799185	1.95969	1.80743	2.11196	1.69785	1.57185	1.82386	4.61281	4.38112	4.8445	1.44331	1.33559	1.55103	0.611075	0.589649	0.632502	-16.2027	-24.3915	-6.77022	-3.29366	-13.062	-5.31385	-11.7081	-16.4708	-6.24871	0.622495	-4.60314	-3.88362	-12.4788	-26.9206	-7.97775	-5.52947	-7.55435	-1.17388	-3.20533	-0.756588	1.85734	-4.03279	-7.16806	0.131652	-5.17614	1.46687	-0.152819	-1.87201	-0.871444	-0.275673
UUUUC	U-rich_d1	0.478895	0.448879	0.508911	0.817782	0.686009	0.949555	2.45767	2.36491	2.55042	1.96879	1.69355	2.24402	1.24519	1.13328	1.3571	0.328446	0.304721	0.352172	0.662042	4.69618	5.80982	4.79499	0.593223	-0.131997	0.817367	1.8057	7.46372	9.79644	6.86127	2.56584	-0.721168	0.576597	-0.864917	-0.661418	0.292701	2.97497	12.2304	2.01875	1.12579	4.95437	6.56318	11.4258	5.37512	6.32298	11.1973	6.76174	12.1875	6.88998
UUUUG	U-rich_d1	0.481581	0.45338	0.509783	0.653973	0.528095	0.779851	1.78789	1.69679	1.879	0.983368	0.797878	1.16886	1.58374	1.48211	1.68538	0.652804	0.613307	0.692301	0.949182	6.83587	10.0081	4.22488	10.5747	5.83421	6.00628	7.17931	5.35362	5.05547	10.7111	1.59344	5.25953	0.566405	1.1893	14.0296	8.60256	13.6091	4.86038	5.74015	11.1451	6.82118	4.13161	13.64	8.93105	27.1308	5.86847	4.91488	1.5061	0.785995
UUUUU	U-rich_d0	0.691391	0.66441	0.718372	1.3305	1.24336	1.41763	2.37575	2.31905	2.43244	1.9835	1.85598	2.11101	1.77003	1.69917	1.8409	0.594507	0.578705	0.61031	-6.15132	-0.827848	0.775846	0.107427	-1.69842	0.897852	0.573298	-1.23506	9.11676	14.4954	7.76456	-0.607975	-9.8899	-6.16242	-3.98482	-2.40235	2.19924	-1.71601	-1.12596	9.33939	14.4156	7.50143	13.7014	16.3397	21.3654	15.9333	10.718	16.9295	14.2198	6.00635
[truncated: 471 more columns]

## Sheet: 6mer motif importance
		[-80, -30) region			[-30, -15) region			[-15, -5) region			[-5, 2) region			[2, 15) region			[15, 60] region			Sum importance profile
Motif	Family	Mean importance score	95% confidence interval: Lower bound	95% confidence interval: Upper bound	Mean importance score	95% confidence interval: Lower bound	95% confidence interval: Upper bound	Mean importance score	95% confidence interval: Lower bound	95% confidence interval: Upper bound	Mean importance score	95% confidence interval: Lower bound	95% confidence interval: Upper bound	Mean importance score	95% confidence interval: Lower bound	95% confidence interval: Upper bound	Mean importance score	95% confidence interval: Lower bound	95% confidence interval: Upper bound	-250	-249	-248	-247	-246	-245	-244	-243	-242	-241	-240	-239	-238	-237	-236	-235	-234	-233	-232	-231	-230	-229	-228	-227	-226	-225	-224	-223	-222	-221
AAAAAA	A-rich_d0	-0.649757	-0.737447	-0.562066	2.24877	1.90196	2.59559	-2.07784	-2.95928	-1.1964	0.631833	-0.789221	2.05289	0.339117	0.169898	0.508336	0.557593	0.504738	0.610448	-1.9924	-6.48075	-8.4323	-14.453	-1.97296	-2.62483	-7.46939	-1.32557	-5.27951	-1.72916	-4.48174	-6.77684	-1.49412	-8.20676	-3.10278	-0.659963	-0.197484	-3.35371	-0.351267	2.37664	-2.91498	-2.60101	2.09805	-0.0593941	2.44157	1.3849	-0.331205	1.12905	0.604894	-1.63435
AAAAAG	A-rich_d1	-0.655376	-0.741349	-0.569402	0.721806	0.192609	1.251	-1.69872	-2.60466	-0.792784	4.19073	2.50491	5.87656	0.35215	0.161796	0.542503	0.703988	0.587883	0.820093	-0.734968	-5.06893	-3.41485	-3.33642	-1.01086	0	0.228942	-0.198	0	-1.88669	0	-6.59764	-0.86955	1.82215	1.6072	-2.52021	-3.73905	-0.288315	2.09461	-4.41933	0.0320345	-1.21184	0.479164	2.90027	0.741322	4.11648	1.00793	3.84273	7.93258	1.46741
AAAAAU	A-rich_d1	-0.292297	-0.409384	-0.17521	3.13351	2.7594	3.50763	0.322923	-0.24105	0.886897	2.66727	1.5619	3.77265	0.524451	0.256572	0.79233	0.607067	0.552495	0.661638	-2.25243	-4.16979	-1.48978	-10.1338	-18.5464	-3.25031	-2.60832	-5.752	-2.94695	-2.83264	-3.40808	-4.14905	-7.2362	-3.65189	-9.06876	-0.762896	-0.466197	0.0583518	-2.38577	0	-0.239386	-0.114878	2.37073	-1.60949	0.835509	0	0	-0.464335	-6.49338	-1.42274
AAAAGA	A-rich_d1	-0.599278	-0.715852	-0.482704	1.70495	0.85656	2.55334	-1.28655	-6.1578	3.58471	1.84557	-10.8784	14.5695	0.20697	-0.129954	0.543894	0.427475	0.345501	0.509449	1.07058	-2.59609	0.214477	-2.92566	-1.49221	-0.952706	0.689298	-2.08488	-3.75647	-0.894652	-0.330718	0	-1.73933	0.194056	0.562496	0	3.1945	-1.86873	5.40557	4.08995	0	0.597983	2.25504	-0.619433	0	2.09467	-0.194049	-0.321325	2.99571	2.721
AAAAGU	A-rich_d2	-0.31665	-0.425396	-0.207904	1.06245	0.150068	1.97482	0.376928	-0.507803	1.26166	1.69743	-0.622962	4.01782	0.864109	0.535276	1.19294	1.03226	0.918693	1.14582	-1.94282	-0.383509	-4.54564	-4.2509	-1.60018	0	0	0	0	-1.45843	-0.450695	-8.55409	-4.03715	0.5039	0	0	-8.62488	0	-1.53005	-0.891918	-4.38343	-0.351401	-2.83676	-1.20226	0.480602	0.0366594	1.07113	-1.60991	1.575	-0.517606
AAAAUA	A-rich_d1	-0.019485	-0.230783	0.191813	3.71506	3.33731	4.09281	-0.848945	-1.76352	0.0656255	2.96409	2.10943	3.81875	0.571469	0.306426	0.836513	0.689002	0.617336	0.760668	-5.60473	-10.2005	-12.6496	-12.947	-4.21613	-20.9836	0	0	0	-2.66005	0	-5.31754	-3.78967	0	0	-7.12318	-3.02814	-2.32506	0	-0.837376	0	-6.71106	0	-0.431473	0	-2.56013	0	-0.272349	-1.81841	-5.90944
AAAAUU	A-rich_d2	0.00605895	-0.0856609	0.0977788	2.39514	2.09096	2.69932	0.694424	0.35683	1.03202	3.65101	2.79549	4.50653	0.751424	0.62728	0.875568	0.651091	0.593495	0.708687	-6.85399	-0.470098	-5.97418	-3.0654	-5.21988	-6.81483	-7.2137	0.0767906	-2.49045	-2.16798	-3.60399	-5.77338	-9.65672	-6.32689	-2.58095	-3.26218	-4.27595	0.4421	-0.969771	0	-0.937407	-5.30405	-5.24296	1.71558	-13.1542	-0.893438	-0.612217	-10.9409	0	-1.09737
AAACAA	A-rich_d1	-0.614858	-0.844048	-0.385667	2.33272	1.6518	3.01365	-0.614269	-2.07166	0.843125	2.55341	1.28324	3.82358	0.130836	-0.0275804	0.289252	0.508222	0.425257	0.591186	-3.55443	-2.22706	-6.0587	-1.6006	-1.83413	-1.49067	0	-2.83351	0	-7.18324	0	-7.51017	0	-0.505751	-2.96057	-4.78779	0	-2.6638	-1.24071	-0.670266	-1.32183	-3.07351	-1.55031	-5.28398	-3.16145	-2.30039	0	-1.45585	-1.8397	0.514538
AAAGAA	A-rich_d1	-0.621751	-0.727717	-0.515786	1.69778	0.982909	2.41265	-1.36756	0	0	1.80301	0.875086	2.73094	0.142334	-0.0528609	0.337529	0.504184	0.399247	0.609121	-0.108964	-0.325788	-2.35216	-0.501548	-7.73038	0.55272	2.15535	1.00419	1.19964	0	0.662514	-0.0794595	-0.319617	0.847084	1.0374	0.783988	-0.365239	5.16622	0	4.39825	5.76905	0.423504	-1.98699	2.65266	0	3.0958	-0.7197	2.50548	3.59435	4.65083
AAAGUA	GUA_d0	-0.482606	-0.690101	-0.275112	1.52572	0.801563	2.24988	-0.363013	0	0	2.19216	0.816825	3.56749	0.98475	0.799464	1.17004	1.39078	1.30551	1.47606	-2.08465	-1.79135	0	-3.3855	0	-8.71196	-3.39202	0	0	-1.01779	-5.07541	-2.09852	-5.7832	-9.71827	0	-3.05204	0	-7.44692	0	-7.5435	-4.0335	-1.35098	-5.7633	-9.81746	0	-14.9153	0.155435	0	0	0
AAAUAU	A-rich_d2	0.401342	0.190703	0.611981	3.88774	3.54791	4.22756	0.592196	-0.0302884	1.21468	3.04537	2.35945	3.73128	0.70469	0.475879	0.933501	0.7791	0.688173	0.870027	-5.23783	0	0	-10.7427	-4.15263	-2.14286	-3.86964	0	0	0	-8.26962	-12.0911	-8.2468	-12.6198	0	0	-1.82175	-5.33975	-3.51992	0	0.00410048	0	-1.655	-2.28318	-8.46111	-4.83125	-0.893877	-1.19093	-0.617841	-0.255186
AAAUGU	A-rich_d3	-0.223922	-0.352037	-0.095808	2.13389	1.66535	2.60244	0.323619	-0.402545	1.04978	2.67175	1.59005	3.75346	0.815734	0.648611	0.982858	0.96783	0.866245	1.06942	-2.64701	-3.94905	-2.1239	-4.49777	0	0	-0.0866848	0.556642	-1.67965	-1.99447	0	-7.85579	-0.682786	0	0	-2.27158	0.218883	0	0	0	0.627693	-1.37506	-0.491999	-0.955205	0	0	-1.82651	0	-2.52813	0
AAAUUA	A-rich_d2	0.299653	0.115728	0.483578	2.9476	2.58586	3.30934	0.481246	-0.190141	1.15263	3.53463	2.84311	4.22614	0.673359	0.482628	0.864089	0.674985	0.600628	0.749342	-7.29233	0	-2.89342	-4.93238	-0.887388	-2.47964	-4.36377	-2.59051	0	-1.26605	-10.149	-2.15214	-8.00376	-4.05071	-4.55597	0	-7.39813	-6.5286	-3.31459	-2.15135	-2.74519	-0.156967	-10.4723	0	0	-6.53551	-2.63391	-4.97564	-0.865744	-1.5218
AAAUUU	A-rich_d3	0.416327	0.320537	0.512117	2.72224	2.43856	3.00591	1.93373	1.53807	2.32939	4.21482	3.62278	4.80686	0.83209	0.674427	0.989752	0.786489	0.721833	0.851144	-7.25802	-3.65667	0.217428	-2.10231	-3.34681	-6.44286	-0.908805	-0.784311	-0.0815207	-3.54598	-1.08088	-1.63365	-1.50757	-2.60868	-1.96026	-2.95132	-1.48819	-1.966	0.294228	-0.694701	-3.74083	0.069944	-5.20855	-2.46037	-0.493955	-4.42231	-0.850035	0.803255	-7.29245	-5.31622
AACAAA	A-rich_d1	-0.625875	-0.79053	-0.46122	2.65234	2.0224	3.28228	-0.664335	-1.69871	0.370042	1.78676	0.578674	2.99485	-0.0226586	-0.358816	0.313498	0.32109	0.25378	0.3884	-8.55334	-2.65765	-2.74644	-3.52629	-0.863091	0	-10.4294	0	-5.76958	0	0.442068	0	-3.15025	-9.78094	-1.1598	-6.81137	-0.356162	0	-4.69671	0	-1.20416	-4.46658	-5.74765	-0.510074	-2.84059	-2.28811	0	-7.26141	-6.51226	-1.48062
AAGAAA	A-rich_d1	-0.647063	-0.732963	-0.561163	1.60113	0.614805	2.58745	-1.1101	-2.07997	-0.14023	1.81133	1.16295	2.45972	0.228462	0.099525	0.357399	0.409639	0.319127	0.500151	-5.0098	-2.15212	0	-0.67667	-0.559492	-6.10265	-0.547601	1.29826	-1.65479	0	-4.48052	-0.0673602	2.9227	-2.23703	3.82327	0.667052	-1.26295	-5.0063	2.03288	-1.47293	3.28497	2.51379	1.69581	1.97364	4.62487	1.07532	2.59888	2.15925	5.36879	3.1865
AAGAAG	A-rich_d2	-0.708902	-0.833411	-0.584393	0.0772528	-2.76357	2.91808	-0.220509	0	0	0	0	0	0.0250071	-0.232657	0.282671	0.454653	0.281685	0.627622	1.59664	3.8082	4.22888	4.57031	5.62902	6.11297	4.09981	4.26241	4.73102	7.01938	8.35648	1.9908	2.61263	2.36661	3.0943	5.15211	13.1965	3.41723	6.3102	2.16878	7.62254	11.9956	3.36484	0.916143	7.68088	3.85423	3.35853	6.83018	6.92428	5.48407
AAGGAA	A-rich_d2	-0.616628	-0.822871	-0.410385	-0.0421192	-15.5384	15.4542	-3.10603	0	0	1.69913	0.647536	2.75073	-0.196953	0	0	0.12672	0.0314034	0.222036	0.645602	-0.580604	1.59904	1.8361	3.08381	2.81804	0	1.26675	2.94769	2.89573	0.380758	0	0	0	4.7471	3.41062	-0.92251	3.25886	7.20889	3.39685	0	1.00844	0.794236	0.462635	6.47769	1.35834	1.6688	2.84917	4.50531	1.68071
AAGGAG	A-rich_d3	-0.366401	-0.553548	-0.179254	-0.940767	-1.99163	0.110098	0	0	0	-0.295299	-14.1968	13.6062	-0.374734	-1.98781	1.23834	-0.060173	-0.186821	0.0664746	0	0.405138	3.36548	2.63968	4.84031	4.91938	1.27522	7.35162	4.75349	3.36739	0	0	0	0	6.44532	1.43539	0	3.27097	1.85475	0.879639	0	0	2.3585	-0.0193617	4.42803	2.5833	0	3.60497	4.99926	1.07125
AAGUAA	GUA_d0	-0.32539	-0.616169	-0.0346103	2.14202	1.21758	3.06647	-2.42627	-3.78519	-1.06736	3.06457	1.83093	4.2982	0.929296	0.544393	1.3142	1.34042	1.2741	1.40673	0	0	0	0	0	-0.886271	-1.73706	-3.485	-2.66045	-7.45385	0	0	-3.36239	0	-3.31772	0	0	-2.55419	-2.43486	-4.17005	-7.10912	0	0	-3.54479	-3.96466	-3.23454	-4.17567	-0.2236	0	-2.76931
AAGUAG	GUA-UAG_d0	-0.390967	-0.611096	-0.170838	-1.3558	-2.14315	-0.568447	0	0	0	2.53684	-6.52733	11.601	1.00347	0.855108	1.15183	1.48881	1.39528	1.58234	0	0	0	0	-1.1879	0	0	0	0	0	0	0	0	-4.36666	0	0	0	0	-2.28541	0	0	0	0	0	0	0	-4.44459	-2.18009	0	0
AAUAAA	A-rich_d1	0.557724	0.0326779	1.08277	5.19746	4.83474	5.56017	-0.599408	-2.99104	1.79223	1.65597	0.841488	2.47046	0.434758	0.10315	0.766365	0.340976	0.231536	0.450416	0	-11.9288	-15.5875	-5.04358	0	-2.41933	-3.58598	-4.56814	-1.93873	0	-8.12629	-3.79586	-7.66779	0	0	0	-3.85196	-7.35649	-12.7981	0	-5.4083	0	0	0	-4.65937	-5.84829	0	0	0	-2.72216
AAUACA	A-rich_d2	0.283057	-0.0257897	0.591904	4.6166	4.28283	4.95038	-0.21483	-1.17409	0.74443	2.37392	1.58473	3.1631	0.201845	-0.153813	0.557502	0.24045	0.139422	0.341477	-5.25565	-2.65766	-4.73768	-3.97659	-3.2367	-6.37081	-5.24955	-2.94326	-1.80733	0	0	0	-3.12844	-4.23255	-8.34327	-2.84132	-1.90254	0	0	-5.48197	-5.26221	0	-0.462049	-5.54585	0	-1.52801	-1.74579	-0.876851	-3.55733	0
AAUAUA	A-rich_d2	0.663148	0.352313	0.973983	5.00312	4.64356	5.36269	0.537059	-0.497442	1.57156	2.68379	1.76443	3.60316	0.608469	0.271317	0.945621	0.582542	0.491303	0.67378	-3.16259	-4.65608	-6.11749	0	-9.11449	0	0	-1.81893	0	0	-7.04464	0	0	-5.74626	-10.8131	0	0	0	-2.26178	-10.3036	-2.15106	0	0	0	0	-12.7488	-1.42889	0	-3.04834	0
AAUAUU	A-rich_d3	0.642744	0.464793	0.820695	4.28215	3.96329	4.60101	1.34735	0.954127	1.74058	3.17377	2.623	3.72454	0.984825	0.682481	1.28717	0.616799	0.549245	0.684353	-1.46108	-2.1597	0	-2.17655	-9.13935	-2.61145	-6.64084	-0.419544	0	-2.52889	0	-8.19608	-2.01131	-5.04774	-12.342	0	-1.56533	-1.32158	-0.537478	-1.9567	-3.09394	-2.62685	-3.76915	-1.59013	-3.12131	-1.15461	-2.72052	-0.940471	-1.12458	-2.24111
AAUGAA	A-rich_d2	0.451715	0.129595	0.773836	4.88668	4.58346	5.1899	-0.188141	-3.41821	3.04193	2.98647	2.22522	3.74771	0.0893912	-0.19393	0.372712	0.107363	-0.0110062	0.225732	0	-7.44655	0	-0.86547	-1.6544	-5.6775	-0.6368	-0.935264	-2.92418	-2.01879	0	0.0226607	0	0.44938	-3.55695	-3.56303	-4.48391	-0.541047	-0.317959	0	-1.93767	0	-1.36839	0	-1.87867	-3.48243	0	-2.63381	0.0575289	0.493021
AAUGUA	GUA_d0	-0.230324	-0.543665	0.0830162	2.37383	1.71001	3.03766	0.683342	-7.14946	8.51614	3.41168	2.51242	4.31093	1.37752	1.12618	1.62886	1.37224	1.28707	1.45742	0	-3.12448	-3.50713	-4.55093	-5.20258	-5.63945	0	0	-4.42706	0	-5.23768	-11.3392	0	0	0	0	0	-8.6469	0	0	0	0	0	-5.18272	-10.589	0	0	0	0	0
AAUUAA	A-rich_d2	0.430848	0.152008	0.709688	4.46872	3.96837	4.96906	0.571478	-0.223828	1.36678	3.47387	2.54411	4.40363	0.552529	0.297324	0.807734	0.582767	0.511406	0.654128	0	-1.73666	0	0	-8.39779	-6.6595	-12.8089	-3.15866	-1.22682	0	-3.53627	-6.56277	-7.7033	0	0	0.269118	0	-1.35633	-6.89831	-3.6183	0	0	0	-4.63344	0	-1.97786	-1.21011	0.48239	0.221531	-2.01834
AAUUAU	A-rich_d3	0.506753	0.353505	0.660001	3.06808	2.74893	3.38724	1.40773	0.882671	1.9328	3.27773	2.35099	4.20446	1.04872	0.741746	1.35569	0.648636	0.572477	0.724794	0	-15.6912	0	-8.88642	-1.43714	0	-2.22927	-2.3878	-3.68118	-4.31549	1.78395	-2.13678	-1.9978	-6.37544	-3.46837	-8.24551	-1.13109	-2.70142	-6.48778	-5.38221	-2.80132	0	-2.46755	-3.94209	0	-0.360926	-2.16369	-2.59697	-1.87924	-5.14964
AAUUGU	NA	0.0156833	-0.124564	0.15593	2.00667	1.16154	2.8518	0.815897	-0.130621	1.76241	4.34598	3.21048	5.48148	1.15092	0.954284	1.34756	1.1594	1.04524	1.27355	-0.333299	-1.48365	-2.40785	-3.52253	0	0	-2.29399	0	-0.278626	0	-0.509277	0	-6.08731	-2.56715	0	0	0.224769	-0.183817	-1.66152	0	-0.216934	-0.45596	-1.56547	0.231161	-1.59223	0	-3.96365	0.589093	-0.524196	0
AAUUUA	A-rich_d3	0.791635	0.656524	0.926747	3.7391	3.44846	4.02975	0.703704	0.149376	1.25803	3.91229	3.28996	4.53462	0.806592	0.579519	1.03366	0.696412	0.632774	0.760049	-7.14616	-10.5274	-6.14673	-1.01942	-3.04979	-2.48545	0	0	-3.12549	-3.70167	-1.11784	-1.17243	-2.84637	-0.519171	-8.28698	-1.99437	-8.66166	0	-4.48703	-2.37675	-2.36175	-5.14059	-1.08277	-6.87615	-1.07922	-5.84918	-2.79428	-4.34257	-1.00268	-5.98121
AAUUUU	U-rich_d2	0.518561	0.435972	0.601151	2.93592	2.69303	3.17881	2.25893	2.02959	2.48827	5.64389	5.21219	6.07559	1.20945	1.01137	1.40754	0.819136	0.765073	0.873199	-2.82598	-3.99729	-7.87776	0.966608	-9.7019	-0.824652	1.21689	-0.214347	-0.598351	-1.81646	-3.57851	0	-6.54279	-2.82799	-4.21677	-1.57718	-9.09446	-2.5147	-3.18063	-1.75564	-4.51219	-2.45032	-1.87725	0.396681	0.0345267	1.72669	-3.18657	-0.813765	-7.32071	-4.79659
ACUUUU	U-rich_d2	0.616362	0.545228	0.687496	1.36111	1.04508	1.67715	2.03602	1.81711	2.25494	4.47948	3.60087	5.35809	1.16557	0.842656	1.48848	0.422218	0.376474	0.467963	0.630554	-0.743657	-0.479628	0.0728087	-1.69186	-2.44159	0.652932	0	0.93249	1.05902	0	-2.34026	0.78753	-0.796869	1.06104	-0.394501	4.18592	0.533384	1.76428	0	0	0.737029	0.557372	5.4942	0	1.50265	0.669951	-2.42596	-2.47035	0.381613
AGAAAA	A-rich_d1	-0.346947	-0.533662	-0.160232	2.58479	1.81651	3.35306	-0.410265	-1.87218	1.05165	2.93387	-0.239918	6.10765	0.149213	-0.108935	0.40736	0.598732	0.506241	0.691224	-4.57395	-4.72582	0.45725	-0.518987	-1.84839	1.59459	-0.777505	0.610379	2.46635	-1.9637	-4.44116	-4.3402	-0.504043	3.05063	0	-0.422329	-1.10771	-0.261843	0.212482	-3.01165	-0.315611	-2.47808	-3.82001	-1.14526	3.10382	5.09906	0.1037	2.36888	3.25656	4.40707
AGAAGA	A-rich_d2	-0.538837	-0.715498	-0.362175	0.0559587	-0.908349	1.02027	-1.30091	0	0	1.74779	0	0	0.0471934	-0.174494	0.268881	0.199205	0.0931191	0.305291	-0.0365119	2.65119	4.19087	0.761739	1.50907	1.93103	3.26984	1.92693	4.43162	5.497	2.24994	1.22747	0.436066	-0.785047	10.8925	3.85362	2.64191	6.68627	2.41673	3.58356	1.8681	4.16752	7.13269	4.67733	1.90466	1.27266	0.426777	2.39892	0.960602	4.85257
AGAAGG	A-rich_d3	-0.0529961	-0.255979	0.149987	1.40592	0.275036	2.53681	-1.73438	0	0	1.23583	-29.0015	31.4732	-0.238622	-0.664133	0.18689	0.130553	-0.0611905	0.322296	1.0286	1.43461	1.01885	7.80697	0	5.57124	3.29947	1.78572	4.0297	0	8.21711	0	0.0980452	3.85914	-2.08971	2.14639	1.84695	2.37886	0	4.93185	-1.09437	2.58365	10.2894	5.2536	0.571947	3.46228	0.66682	0	9.60934	2.81448
AGGAAG	A-rich_d3	-0.540878	-1.10359	0.0218373	0	0	0	-3.40303	0	0	0	0	0	0.0179967	-0.915143	0.951136	0.2797	0.0507319	0.508668	2.51522	1.06511	0.65327	8.54122	0	0	4.07922	0	3.30312	0	3.86133	0	0	1.9825	0	0	2.89858	1.40062	0	2.37261	0	0	0	0	1.20816	3.41443	2.94238	3.98928	0	0
AGUAAA	GUA_d0	-0.185635	-0.495185	0.123914	2.46518	1.75784	3.17251	-1.91333	-4.04484	0.218182	2.68299	1.29411	4.07187	0.972199	0.777114	1.16728	1.37517	1.29802	1.45231	-1.69146	0	0	-4.18988	-5.01096	0	-0.986315	-6.38916	-3.74695	0	-4.06417	0	-6.71632	0	0	0	0	-5.27881	-2.05165	-7.76701	0	-4.71637	-2.11997	0	-11.7364	-5.10454	-5.0699	-1.52161	0	0
AGUAGU	GUA-UAG_d0	0.200937	-0.124678	0.526552	0.27115	-0.894275	1.43657	-1.27817	-1.9538	-0.602534	3.07493	1.09632	5.05355	1.31334	0.953285	1.6734	1.66628	1.55338	1.77918	-2.72033	0	0	0	0	-0.371153	0	-5.17711	0	0	0	0	0	-6.26238	-1.31234	0	0	0	0	0	0	0	0	0	0	0	0	0	0	0
AGUUUA	NA	1.18228	0.997521	1.36704	3.35543	2.75971	3.95115	1.21279	0.764216	1.66137	3.65352	2.86613	4.44091	0.891668	0.665152	1.11818	0.855595	0.730994	0.980195	-8.21397	0	-0.553683	-0.0180393	-0.458814	-3.78837	-1.18387	0	-1.84687	-2.6577	-0.416887	0	-0.235102	0	0	0	0	-3.62238	-0.322362	0	0.526774	0	-0.0230979	-1.08999	-0.804202	0.423405	-0.202242	0	-0.0917371	0
AGUUUU	U-rich_d2	0.935595	0.815396	1.05579	1.89436	1.51186	2.27686	1.67889	1.41603	1.94176	3.82736	2.83583	4.81889	1.14976	0.921671	1.37786	0.735225	0.676202	0.794248	-0.0773044	-0.108424	-1.25767	-0.985344	0.461498	-0.378	0.269441	-3.52484	0.548207	-1.80845	0.229094	-2.34647	0	-1.14629	0	0.113533	-1.41594	-3.29718	1.34773	-0.960134	1.24348	-2.32604	-1.09605	0.046133	0	1.08037	-0.312291	0.138095	0	-1.255
AUAAAU	A-rich_d2	0.431097	0.171713	0.690481	3.95197	3.5352	4.36874	-0.547944	-1.02697	-0.0689148	3.03847	2.01363	4.0633	0.370883	0.126906	0.614859	0.682613	0.612821	0.752404	-8.33075	-2.39574	-3.71232	-2.47051	0	0	-2.51601	0	-2.78944	-0.78922	0	-5.10659	0	0	-4.89841	-8.56271	0	-3.72193	0	0	-5.3825	0	-2.14073	0	-2.73964	-1.87949	0	0	-1.37098	-5.80264
AUAGUU	UAG_d0	1.11436	0.860972	1.36774	2.83557	2.43599	3.23515	0.691259	-0.0109718	1.39349	3.2886	1.89566	4.68153	0.582253	0.366558	0.797947	0.739532	0.669304	0.80976	-1.16375	0	0	0	0	-6.09618	-0.436268	0	0	0	-1.66908	0	0	0	0	0	-1.22515	-3.24301	0	-8.84857	0	-3.31914	0	0	0	0	0	0	-2.83166	0
AUAUAU	A-rich_d3	0.419691	0.271692	0.567691	3.99118	3.63241	4.34995	0.89208	0.388999	1.39516	2.86667	2.44044	3.29289	0.711188	0.519087	0.90329	0.591045	0.535665	0.646425	-3.8841	-5.74561	-12.4084	-9.62625	-6.56352	-8.16351	-7.90978	0	-3.4592	0	0	0	-3.90783	-2.54119	-3.4298	-4.19162	0	-3.25181	-2.29402	-8.41803	-2.58773	-2.20264	-3.58556	0	-5.2417	-5.41772	-3.09629	-4.39664	0	-3.52528
AUAUUA	A-rich_d3	0.798424	0.605877	0.99097	3.96331	3.59113	4.33549	0.662409	0.251847	1.07297	3.43025	2.90453	3.95596	0.772939	0.623761	0.922116	0.622487	0.555501	0.689473	0	0	-3.82697	-4.6518	0	-3.35597	-1.31599	-4.86377	0	-5.17025	-3.8135	-2.66661	0	-2.03852	0	-20.2525	-2.55662	-3.1573	-2.29369	0	0	-3.47151	-2.32612	-7.106	-2.51706	-3.72389	0	-2.50888	0	-6.11264
AUAUUU	U-rich_d2	0.732274	0.621611	0.842937	3.22452	2.97014	3.47891	2.05859	1.7608	2.35638	4.17743	3.82919	4.52566	0.991021	0.842014	1.14003	0.710211	0.65401	0.766411	-5.26758	-0.660918	-4.73323	-1.54891	0	-7.55286	0	-0.102735	-1.80273	-0.594922	-3.64221	0	-5.03273	-1.75155	-2.86191	-2.10057	0	-2.09661	-0.714599	-0.109612	-0.908893	0	0.801089	-2.18683	0	0	-5.89437	-1.99147	-6.47901	-0.77444
AUGAAA	A-rich_d2	-0.0840467	-0.293775	0.125682	4.18845	3.86786	4.50904	-0.42288	-0.903089	0.0573294	2.65838	1.89417	3.42259	0.526744	0.266881	0.786608	0.294795	0.221179	0.368411	-0.52305	-1.87184	-5.33402	0.421006	0	0	-1.6154	-0.993444	-5.19912	0	0.444854	-0.592982	0	0	-3.02442	0	-5.75384	-0.0626354	0	3.74291	-1.2221	-2.34717	0.494735	-1.38771	2.17962	0.653349	-1.12307	0	1.55812	0.364633
AUGAAU	A-rich_d3	0.253268	0.0319546	0.474581	4.14961	3.76934	4.52988	0.927119	0.283669	1.57057	2.63198	1.95773	3.30623	0.311028	0.0854729	0.536583	0.164424	0.0735776	0.255271	-1.57411	-2.3517	-0.0989056	-0.083979	0	-3.43878	0.735757	1.10695	0	0	-2.63702	-0.19359	1.01795	-1.38407	0	-5.36074	0	-2.09886	1.1146	-2.62996	0.183026	-2.38932	0	-2.34499	0.108571	-0.389073	0	0.706619	-2.53788	0
AUGUAA	GUA_d0	-0.647443	-0.913461	-0.381424	1.72275	0.875081	2.57042	-0.0141005	0	0	2.61839	1.26555	3.97123	1.5224	1.31299	1.73181	1.54193	1.4704	1.61346	0	0	0	-7.92365	0	0	0	0	0	-5.75014	0	-4.90919	-4.80514	0	-4.14829	0	0	0	-2.99573	0	0	0	-2.58418	-4.02326	-7.82885	-5.19338	0	0	0	0
AUGUAU	GUA_d0	0.0793104	-0.167095	0.325716	1.72657	1.16074	2.29241	0.591844	0.00366142	1.18003	3.25488	2.67627	3.83348	1.46863	1.3072	1.63006	1.22116	1.15278	1.28953	-2.84365	0	-2.77798	0	-3.01472	-6.10293	0	-1.72259	0	-3.10676	-2.12194	0	0	-5.7189	0	0	0	-2.37366	0	0	0	0	0	0	-2.12422	-2.59878	0	0	0	0
AUUAAA	A-rich_d2	0.166812	0.0128085	0.320815	3.34102	2.8882	3.79384	0.134754	-0.249311	0.518819	3.16788	2.26205	4.07371	0.790136	0.556814	1.02346	0.66383	0.614394	0.713266	-1.23188	0	0	-15.9455	0	-3.99606	0	-2.62101	-3.56921	-3.68164	-4.96882	-5.12153	0	-4.94886	-8.18992	-2.05608	-0.680368	-4.88088	-8.28675	-7.64119	0	-1.24656	0	-1.76017	-8.54903	-5.09194	-3.7304	-2.72013	-5.69668	0
AUUAAU	A-rich_d3	0.809685	0.511788	1.10758	5.02464	4.67366	5.37563	0.969493	0.515404	1.42358	3.26002	2.28895	4.23109	0.791751	0.527082	1.05642	0.452974	0.388691	0.517257	-2.96935	-7.3167	0	0	0	-5.63794	-2.08068	-17.4554	-0.605984	-4.14055	-6.26038	-9.92171	-14.6014	-11.1236	0	0	0	-11.1797	-3.9299	-4.58472	-2.26997	-7.90245	-0.992402	-1.0875	-2.13659	-9.88334	-3.22578	-5.70595	-1.61029	-1.37796
AUUAGU	UAG_d0	0.957122	0.791044	1.1232	2.24503	1.75971	2.73035	0.292369	-0.123567	0.708305	2.34544	1.52641	3.16446	0.932012	0.68202	1.182	1.04692	0.94309	1.15075	-2.47502	0	0	0	0	0	0	0	0	0	0	0	0	-2.87331	0	-2.07814	0	0	0	0	0.0476451	0	0	0	-3.0021	0	0	-2.20941	0	0
AUUAUU	U-rich_d2	0.567315	0.456219	0.678411	2.69432	2.47062	2.91803	1.85185	1.65416	2.04955	3.1893	2.75441	3.62419	1.09852	0.956877	1.24016	0.612766	0.570831	0.6547	-9.0972	-3.32077	-6.13894	-1.33834	0	-3.24668	0	0.538984	-2.37414	-7.12808	-4.27515	-0.981928	-2.7944	-4.3157	-4.9776	-7.05601	-1.76481	-2.84513	-0.501904	-2.99392	-3.65611	-1.98495	0	-0.521204	-5.9756	0	-1.34158	-1.9286	-3.38376	-2.51612
AUUGUA	GUA_d0	-0.146934	-0.350535	0.0566663	0.786729	0.340361	1.2331	-1.01141	-2.25579	0.232976	2.90299	2.35994	3.44603	1.74322	1.56226	1.92418	1.61844	1.55195	1.68493	-5.37784	0	0	-2.52836	0	0	0	0	0	0	-1.6012	0	0	-4.26887	0	0	0	-1.73897	0	-2.75881	0	0	0	0	0	-2.55191	0	-3.46442	-0.890675	0
AUUUAA	A-rich_d3	0.616218	0.451067	0.781369	3.88692	3.48657	4.28727	0.85213	0.489368	1.21489	3.89224	3.41332	4.37116	1.09571	0.882887	1.30853	0.680875	0.619271	0.74248	-2.8486	-8.97735	0	-2.63426	-3.01487	-9.59662	-5.04312	-2.80825	-5.82134	0	0	-2.15579	-10.1601	-3.6023	-6.17792	-4.25824	0	-2.08707	-2.9091	-2.1414	-1.9253	0	0	-2.34517	-4.31455	-2.37272	-3.82683	-3.02565	-3.41985	0
AUUUAG	UAG_d0	1.10497	0.956735	1.25321	2.529	2.07081	2.98718	0.128507	-0.748081	1.0051	3.15758	1.84136	4.47381	0.981072	0.644938	1.31721	0.737662	0.66674	0.808584	0	-3.69102	-2.13727	-2.57046	-2.46133	0	-2.43894	0	0	-1.54071	-2.35462	0	0	0	-5.12958	0	0	-6.87119	0	0.632285	0	-4.26659	-1.3483	-6.10557	0	0	-2.37812	0	-1.30385	0
AUUUAU	U-rich_d2	0.708493	0.582597	0.834389	3.2445	2.99369	3.49531	1.74794	1.45287	2.04301	4.54004	3.94729	5.13279	1.09525	0.880531	1.30997	0.669931	0.625672	0.714189	-4.67797	0	-13.734	-0.804413	-1.15398	0	-0.831742	-10.5532	0	-0.822354	-5.30826	-7.74018	-0.318017	-4.81887	-0.151954	-1.6011	-0.583449	-3.31331	0	-0.689685	-2.18528	-3.70145	-2.13794	-0.315567	-1.10901	0	-0.217781	-2.81707	0.783918	-0.767066
AUUUGU	U-rich_d2	0.366638	0.283222	0.450054	1.21451	0.900828	1.52819	1.686	1.39775	1.97425	5.09252	4.27132	5.91372	1.60691	1.39824	1.81559	1.20509	1.12204	1.28814	-1.34894	-0.273448	0	0.235821	-3.48363	0.0982592	0	0.973034	0.433978	0	0.900409	-0.568556	-0.0735978	-3.62883	1.41712	-2.09918	-1.68858	-0.36844	0.293485	1.87902	0	-0.263976	0.554809	1.85143	-3.17994	0.096626	-0.0369928	-1.33254	0.161947	-2.17403
AUUUUA	U-rich_d2	0.705113	0.580371	0.829855	2.62599	2.36561	2.88637	1.62843	1.36527	1.89159	5.11153	4.78165	5.4414	1.35247	1.09296	1.61198	0.716993	0.675109	0.758877	-15.4139	-3.03868	-3.57732	-6.94517	-3.28931	-10.4191	-3.00497	-2.44819	0	-1.50624	-4.68799	-3.16195	-10.2731	-3.86073	-5.4751	-3.5911	0	-3.34354	-0.24492	1.66699	-1.90028	-3.85401	-0.0892126	-2.6029	0	-1.70569	-2.77856	-1.34925	-2.09795	-2.66437
AUUUUC	U-rich_d2	0.432571	0.357655	0.507487	1.44425	1.21735	1.67114	2.3836	2.18289	2.58431	4.13341	3.48479	4.78203	1.33016	0.937874	1.72245	0.439139	0.376731	0.501548	0	1.31284	-0.21488	0	-0.5061	-7.87187	-0.460457	0.685305	-0.240176	1.03488	-1.87839	-5.34501	-0.856972	-1.60559	-1.78355	1.51816	-1.34971	2.16784	-1.74231	1.29819	0	1.41752	0.444321	1.71082	0	2.11654	0.870032	2.84735	0.350979	-0.918746
AUUUUG	U-rich_d2	0.38265	0.310775	0.454524	1.30758	1.06682	1.54833	1.92909	1.73872	2.11946	3.83044	3.18252	4.47836	1.28792	1.07662	1.49922	0.66179	0.594006	0.729575	3.20794	3.78711	0.998763	0.408609	1.25714	0	-0.920361	-0.951021	3.3617	1.04296	0	-0.16158	0	-0.571892	4.36911	1.56581	2.43911	0.796602	2.87039	1.08286	-0.541293	0	2.92112	0.726401	2.95935	0.535233	0	0	1.887	-0.597137
AUUUUU	U-rich_d1	0.646936	0.584097	0.709776	2.20058	2.00865	2.3925	2.58933	2.44771	2.73094	5.60318	5.15294	6.05342	1.72719	1.53828	1.91611	0.739006	0.70541	0.772602	1.4633	0	-3.83692	-0.731875	0	-2.97663	-0.944413	2.1038	3.79365	-0.423537	-3.39425	-13.5502	-5.33977	-4.97467	3.29184	-4.1945	-1.69082	-7.29758	-4.0072	0.670862	0.706748	1.59567	0	4.42839	0.445879	2.5768	3.11655	-2.60346	-0.152209	-1.31987
CAAAAA	A-rich_d1	-0.572992	-0.683692	-0.462292	1.5965	1.09781	2.09519	-1.03779	-1.50705	-0.568539	2.61232	1.60793	3.61672	-0.00350755	-0.190441	0.183426	0.262984	0.208457	0.317511	-3.40382	-1.83588	-7.53628	-2.1489	-1.42481	-0.124141	0.397083	1.05123	0	0	-11.3519	-0.652521	-2.71602	-0.654525	0	0	1.30767	-0.357362	-1.12852	-0.406805	-0.3642	2.07673	1.27117	0.95117	-0.540497	0.82835	4.81442	3.32771	1.08666	0.393493
CAAGAA	A-rich_d2	-0.686721	-0.810793	-0.562648	0.107808	-1.01568	1.2313	0	0	0	3.79299	0	0	-0.289707	-0.596927	0.0175118	0.111048	-0.01746	0.239556	-0.898832	0.558345	0.414976	1.54174	1.06548	0	1.62797	0	1.71339	2.15431	-1.10211	0.888433	-0.851853	2.12491	0	1.84992	0.370785	1.94057	1.05206	0.337932	0.186059	2.82334	0.994898	5.23423	0.367912	1.27333	5.58192	0	1.03878	1.83788
CAUUUA	NA	0.430046	0.297987	0.562106	1.64294	1.05229	2.23359	1.40239	1.11445	1.69033	4.85732	4.43267	5.28197	0.736351	0.546577	0.926125	0.40931	0.34494	0.47368	-1.43546	-2.57188	-0.502749	0	0	-2.17639	0	0.0638728	-1.28094	0	-2.06957	0	0	0	0	-1.00224	-0.442434	0	0.315679	-0.327745	-5.46696	0	-0.199063	-0.663	0	-1.79652	0	0.570909	0	-0.76686
CAUUUU	U-rich_d2	0.444303	0.365058	0.523548	1.33416	1.102	1.56631	2.19535	2.00051	2.39018	4.88085	4.36558	5.39612	1.18432	0.924308	1.44433	0.430403	0.391256	0.46955	0	0	1.43282	0	-9.37261	-0.414942	1.70751	1.36388	0.0360564	-1.70348	-4.03148	-5.42298	0	3.90432	-2.6942	0	1.93367	2.13804	1.24758	0.292398	0.205292	0	0.535393	0	3.6915	0	1.89653	0	0.0040917	-0.0159397
CCUUUU	U-rich_d2	0.49545	0.437388	0.553513	0.608456	0.376843	0.840069	1.93139	1.759	2.10379	2.69749	2.1994	3.19559	1.15892	0.887455	1.43039	0.270518	0.201561	0.339474	0.516864	0.66257	1.96487	1.0172	0.605854	0.350461	2.72295	2.55908	2.23877	3.26424	-0.240417	0.870375	4.65434	0.674498	0.149744	0	0	2.00026	1.20048	1.54034	3.84654	4.39287	3.07209	1.10608	3.03666	1.11286	0.63497	0.977956	5.89618	0
CUCUUU	U-rich_d2	0.504441	0.422429	0.586453	0.142904	-0.345042	0.630849	1.7539	1.56275	1.94505	2.20812	1.51817	2.89808	1.11382	0.821586	1.40605	0.115164	0.0353568	0.194971	0.783178	1.76807	3.21139	3.22614	2.27008	0.830197	1.95022	1.73951	1.15711	0	-0.867689	0.341612	-0.573849	0	5.29314	5.99403	0	2.4827	0.0852509	0	1.53715	1.48955	2.66886	0.919099	1.75796	1.35061	4.08788	0.728653	0	1.54328
CUGAAG	NA	-0.225958	-0.353182	-0.0987352	-0.263259	-0.953337	0.42682	-0.494994	0	0	3.46869	0	0	-0.0983343	-0.664801	0.468133	0.075929	-0.0523009	0.204159	2.79165	0.9713	2.33475	0.546816	6.3453	3.9018	5.72718	1.68784	1.44746	0	3.40639	5.08154	4.14004	6.3104	0	0	1.79529	0	2.7763	9.38901	0.491599	2.38623	2.22087	0	6.66345	0	2.1644	2.12946	1.45097	0
CUGCUG	NA	0.0370303	-0.110454	0.184515	-0.665118	0	0	0.31367	-5.54037	6.16771	0	0	0	1.00215	-0.10134	2.10564	0.256598	-0.111558	0.624754	3.71085	5.80068	4.52602	12.1557	4.16894	4.71863	17.2399	4.59084	2.40117	8.29817	6.79756	2.5291	5.59812	5.1814	3.40112	5.84665	10.0666	7.18458	0	4.82382	9.40197	4.16884	3.25178	4.30902	2.00939	2.33669	4.27508	-0.65607	6.08608	1.56762
CUGGUG	NA	0.257914	0.165365	0.350463	0	0	0	-0.308869	0	0	0	0	0	0	0	0	0.0437442	-0.280231	0.36772	0	7.05417	4.22256	4.52693	6.48348	0	0	2.23644	3.48226	6.27508	4.94969	5.17642	1.99315	7.08552	0	4.65059	1.5593	3.1209	0	2.42706	7.41585	0.443778	0	5.27134	1.93481	2.80149	5.39111	2.64577	0	0
CUUCUU	U-rich_d2	0.528288	0.45807	0.598507	0.757705	0.271697	1.24371	1.70535	1.49133	1.91938	2.0969	1.14517	3.04862	0.879393	0.674534	1.08425	0.187448	0.124087	0.250809	2.42171	3.08181	1.23179	0.367542	0	1.16802	0.596884	0	1.87183	5.37299	0.920162	0	1.20265	3.67782	3.55241	3.33715	1.03331	2.93826	4.00768	3.01518	1.21375	5.35614	1.74685	1.59717	3.70439	0	-0.230131	1.69642	3.18374	1.32491
CUUUAU	U-rich_d2	0.497602	0.399345	0.595858	1.40712	0.880322	1.93392	1.34897	1.1031	1.59483	5.04865	4.48508	5.61221	0.97549	0.770837	1.18014	0.482635	0.429085	0.536185	0	-5.13586	-0.710584	0.617273	1.32673	-0.56526	0	-3.57939	1.74172	0.0368193	-2.22441	-0.685199	0	-1.40166	-1.09624	-0.88598	0	0.7325	0.121288	0.781275	0	0.466728	-2.26371	0	0.166672	0.292453	0.51606	1.23839	0.376968	0
CUUUCU	U-rich_d2	0.607882	0.518436	0.697328	0.626869	0.119746	1.13399	2.17396	1.95608	2.39183	1.81176	0.952124	2.6714	0.88667	0.531619	1.24172	0.0994672	0.0178561	0.181078	0.540983	0	1.84276	2.88891	0.831418	1.53486	4.37126	0	0.451425	6.43397	0.270373	2.21445	0.34421	0	0	0.659049	0	1.45921	5.57272	1.7315	0	3.27359	3.63298	3.07856	4.97191	1.84001	1.6557	2.15829	1.42128	0.626002
CUUUUA	U-rich_d2	0.748393	0.644701	0.852084	1.98042	1.43905	2.52179	1.81968	1.4417	2.19767	4.74398	4.25972	5.22824	1.18547	0.903048	1.4679	0.432491	0.376656	0.488325	-1.86087	0	0	-2.56297	-0.0517773	-2.54407	-7.58079	0	0	-0.723374	0.431613	-1.74774	-3.83184	0	-0.30848	-1.46036	0	0.919003	1.81297	0.585866	-0.135928	0.727396	-0.392758	-0.786049	1.28408	0	0	1.45545	-0.0684467	1.56804
CUUUUC	U-rich_d2	0.440208	0.385124	0.495291	0.172072	-0.304519	0.648662	2.28863	2.1243	2.45296	1.96144	1.34842	2.57447	1.08334	0.793588	1.37309	0.129497	0.0550103	0.203983	2.92975	0.612152	1.25569	1.81988	0.884788	1.85729	2.29668	3.29105	2.82132	1.93992	2.19125	0	1.28692	3.19524	0.385234	1.27408	5.65818	4.74235	0	0	-0.319504	4.63604	4.90419	1.34694	1.11684	4.40345	3.30943	2.88426	0	1.60304
CUUUUG	U-rich_d2	0.476409	0.41262	0.540199	0.142423	-0.378003	0.662849	1.65615	1.39591	1.91639	1.4542	0.914916	1.99349	1.69322	1.23086	2.15559	0.503291	0.393374	0.613208	0	1.32234	0	1.38289	4.00141	6.16462	3.41033	3.18179	0	1.94562	1.6858	0	0.275102	3.7065	1.35916	3.99947	6.72331	5.19264	0	3.78769	2.31395	0	3.73547	2.22679	8.62371	0	3.03179	0	0	0
CUUUUU	U-rich_d1	0.702149	0.654314	0.749983	1.03473	0.846467	1.223	2.46898	2.33548	2.60247	2.42992	2.04843	2.81141	1.60711	1.41872	1.79549	0.473049	0.429128	0.516971	0.16332	0.338693	3.46809	1.83864	4.32035	2.46131	-1.03439	6.28587	3.96334	1.22988	1.81117	0.983599	-0.26316	3.71613	-0.725901	-2.05462	1.28788	0.950919	3.43975	4.70503	2.91938	1.1303	3.0048	5.22907	4.06602	3.27503	3.80606	7.94175	3.62085	1.00118
GAAAAA	A-rich_d1	-0.649397	-0.72891	-0.569883	2.17684	1.47576	2.87792	-0.399154	0	0	1.18243	-1.60038	3.96524	0.0200437	-0.10998	0.150067	0.344995	0.295526	0.394463	-4.13683	-3.97155	-4.88701	0	0.754739	1.05029	1.51419	-1.11899	1.72346	2.80229	-1.5506	-3.16416	0.982269	0.0342919	2.38175	0.335558	1.91455	1.84538	4.54397	1.15391	1.26083	6.61774	1.54074	2.17618	2.98943	1.61037	6.37193	6.53749	5.50303	2.72106
GAAAAG	A-rich_d2	-0.432109	-0.515866	-0.348351	1.57819	-0.0866171	3.24299	-0.67865	-1.79698	0.439675	2.93416	0.94938	4.91895	0.0977327	-0.207555	0.403021	0.426564	0.320361	0.532767	-0.310372	-0.29121	-0.973548	-0.0768746	0.488182	0	3.36475	0	-0.532736	0	-0.689314	1.32725	2.7236	2.09649	0	1.20721	0.0443269	7.43413	0.532919	2.26979	6.10454	1.23083	1.02411	0.289888	2.34239	0.896194	10.1309	4.29154	1.08115	1.48305
GAAGAA	A-rich_d2	-0.597146	-0.714619	-0.479672	0.349736	-0.58172	1.28119	-1.76598	-6.25238	2.72042	1.15698	0.0616684	2.2523	-0.220131	-0.471531	0.03127	-0.0157468	-0.109195	0.0777018	0.738038	1.00015	2.40178	6.79201	8.46743	10.833	8.7011	6.62699	4.86411	10.0995	2.5842	3.70083	1.94749	10.5389	11.0599	14.0854	3.25116	1.19905	6.50652	12.9088	9.47079	7.98973	2.35586	8.0991	7.10674	2.43764	4.56912	9.96471	5.26731	13.5514
GAAGCU	NA	-0.0850306	-0.231585	0.0615241	0	0	0	-0.451346	-5.96455	5.06186	2.08359	0	0	-0.0275516	-0.368681	0.313578	0.0887584	0.0358957	0.141621	0	1.48594	2.0897	1.12059	2.11167	3.27904	0	7.46553	2.49799	2.93255	0.941684	3.62892	0	4.56355	2.06128	2.43385	5.38493	0.681025	6.07958	1.76543	0	7.04685	4.81761	4.94798	1.49047	0	1.38603	7.46564	3.46586	0
GAAGGA	A-rich_d3	-0.364239	-0.613349	-0.11513	-0.888096	-9.57505	7.79886	-1.54359	-4.06397	0.976795	0.400354	-1.44463	2.24533	-1.10589	-3.74045	1.52867	-0.129631	-0.241846	-0.0174167	1.23255	1.97911	4.38541	4.48163	9.3178	2.80218	11.822	5.11105	4.96388	0.740157	0	2.76596	0	9.03041	3.27644	0	0	5.72522	0	0	3.1682	2.84906	0	8.88565	3.98056	0	9.07075	5.75871	1.36391	3.45971
GAUGCU	NA	0.165002	0.0838081	0.246196	-0.0229245	-0.369061	0.323212	0.389452	-0.148078	0.926983	2.29181	0	0	-0.121324	-0.536534	0.293885	-0.0970913	-0.166952	-0.0272309	0.89971	0	5.3408	1.03029	0.781003	2.6548	3.97737	3.32731	3.95258	4.32479	0	0	5.2528	6.01587	1.29145	7.19656	1.68875	0	1.97334	7.23089	2.73038	2.49497	1.61163	3.78854	4.07651	0.999142	1.78651	0.575323	2.28944	0.945613
GCUGCU	NA	0.267641	0.17339	0.361893	-0.194373	-0.38966	0.000913134	0.132602	0	0	0	0	0	0.318211	-0.597302	1.23372	-0.044535	-0.200692	0.111622	3.65727	1.84363	14.4101	5.07232	6.73837	23.9563	5.58862	1.66325	7.44742	6.10481	4.90294	5.54607	1.99	5.63435	6.64226	8.5644	5.84884	2.721	4.90406	6.06492	4.41194	1.77045	8.07172	3.70605	8.24275	3.5785	0.15282	2.15819	2.93778	6.15506
GCUUUG	NA	0.327916	0.17021	0.485621	-0.117	-0.214594	-0.0194063	0.49178	-0.0340611	1.01762	0.555545	-0.686631	1.79772	0.916289	0.664608	1.16797	0.421636	0.276114	0.567157	0	4.53659	3.05553	0	1.80835	5.78722	5.71391	4.43845	6.94844	0	2.25385	2.54193	0.768123	0	2.94829	3.47052	2.50877	0	1.28211	3.40322	3.82215	3.18735	0	1.59083	0	1.85223	0	1.87058	0.934424	-0.713552
GCUUUU	U-rich_d2	0.670367	0.615397	0.725337	0.649231	0.228632	1.06983	1.85082	1.65891	2.04274	2.0859	1.67641	2.49539	0.985471	0.712473	1.25847	0.354938	0.295767	0.414108	0	0	4.2538	3.99707	4.73674	3.16068	4.0816	1.87634	0.36872	-0.176797	2.12888	0	4.1839	0	3.36251	6.29781	1.88759	2.09542	1.47301	1.54433	0	4.94008	5.27637	2.7383	1.39471	3.754	0	1.38516	0	0
GGAAAA	A-rich_d2	-0.317479	-0.41268	-0.222277	0.610995	-0.556796	1.77879	-1.7315	-2.23478	-1.22822	1.06713	-0.37908	2.51335	-0.414062	-0.808938	-0.0191863	0.0654683	-0.00440621	0.135343	-2.55163	0.859493	0.517026	0	2.02084	0.798646	0	0	2.606	0	2.5633	0	2.4247	0	-0.0505983	3.08639	8.89334	4.72644	0.911789	3.12963	7.34105	0	2.11881	3.52011	0	6.95084	5.58006	0	2.05729	0
GGAAGA	A-rich_d3	-0.152794	-0.330994	0.0254055	-0.78476	-1.38933	-0.18019	-1.72573	0	0	1.09913	0	0	-0.265907	-2.69491	2.1631	-0.00976776	-0.180028	0.160493	0	0	2.19358	2.40024	10.4624	0	0	2.95035	2.05327	0.00725546	0	0	1.92083	7.42415	1.82885	0	0	1.388	0.579414	0	0	0	1.04859	0.97168	1.55617	0	2.88032	5.69396	2.4968	0
GGUUUU	U-rich_d2	0.833712	0.756474	0.910951	0.756498	0.421779	1.09122	1.54643	1.3524	1.74047	0.920191	-0.0906631	1.93104	0.570823	0.397941	0.743705	0.273752	0.209051	0.338453	0	3.07717	1.29297	0.265385	0.463788	6.31608	0	1.47567	4.06396	3.9538	0	2.66173	3.37438	1.13612	2.69773	0.95929	1.50156	7.82088	1.06435	0.954119	3.14243	0	4.09888	15.551	1.08247	1.78142	4.61457	0	1.1612	1.48572
GUAAAA	GUA_d0	-0.650005	-0.813109	-0.486901	1.06254	-0.0846831	2.20977	-1.69309	-3.28487	-0.101316	2.0465	0.56365	3.52934	1.23968	1.05573	1.42364	1.51374	1.43828	1.58921	-1.24855	-3.57457	-3.48582	-1.59506	-2.36933	-2.07205	0	-5.54989	-3.62271	-2.49199	-3.73246	-4.81008	-2.72449	-6.29084	-6.08231	0	0	0	-3.85174	-4.69358	-3.52855	-1.59953	-8.21827	-4.80017	0	-0.368923	-8.15818	-3.22658	-1.85483	0
GUAAAG	GUA_d0	-0.708653	-1.06409	-0.353213	0.190875	-2.01382	2.39557	-1.83974	0	0	3.2987	2.59999	3.9974	1.01117	0.847693	1.17464	1.45619	1.34531	1.56708	-0.821402	-1.45131	0	0	0	-1.81886	0	-2.50784	-2.39511	-5.47491	-3.59218	-2.64351	0	0	-3.75736	-1.22304	0	-2.99627	0	-1.64821	-8.86466	-2.67624	0	-0.474383	0	0	0	-3.58884	0	-1.8764
GUAAAU	GUA_d0	0.302697	-0.0287227	0.634117	2.93397	2.30614	3.5618	-0.925863	-1.42303	-0.4287	3.1734	1.53265	4.81415	1.17492	0.901267	1.44858	1.50034	1.42309	1.57759	0	0	0	0	-3.30174	0	-1.37144	0	-7.2723	-3.87066	-3.35797	-3.8035	0	0	-3.29861	-4.26234	-4.14826	0	-10.9296	0	-3.64336	-5.32961	-4.84509	0	-3.43354	-10.4482	0	0	0	0
GUAAUU	GUA_d0	0.198348	-0.0260503	0.422746	2.19793	1.64531	2.75056	-0.37414	-0.906721	0.158441	2.99194	1.45484	4.52904	1.36327	1.15411	1.57243	1.49926	1.43346	1.56506	-1.71861	-2.99466	0	0	0	-1.17279	0	0	0	0	0	-3.56102	-3.42044	-4.07992	-8.07955	0	-11.2822	0	0	0	0	0	-1.10652	0	-4.52657	0	-1.1263	-1.64205	-6.20514	0
GUAGUA	GUA-UAG_d0	-0.085155	-0.423839	0.253529	0.632513	-2.02334	3.28836	-2.99334	0	0	0	0	0	1.7415	1.12637	2.35663	1.96452	1.83056	2.09848	0	0	0	-6.54534	0	0	0	-2.42656	-6.9571	0	-3.62231	0	0	0	-8.18685	0	0	0	0	0	-9.27287	0	0	0	0	0	0	-10.0239	0	0
GUAGUU	GUA-UAG_d0	0.722701	0.471733	0.973668	1.64408	0.874776	2.41338	-0.671703	-1.01055	-0.332857	3.56568	2.16843	4.96294	1.30139	1.10944	1.49334	1.5615	1.48344	1.63957	0	-1.70876	-2.68223	-3.23152	0	0	0	-1.94473	0	0	0	0	-1.59049	-2.59625	0	-8.46813	-4.90494	-2.04932	0	0	-2.91054	0	-2.31318	0	0	0	0	-1.66822	0	0
GUAUAU	GUA_d0	0.124954	-0.0478631	0.297771	1.07916	0.467596	1.69072	0.0493971	-0.284199	0.382993	2.2935	1.21171	3.37529	1.23415	1.08258	1.38573	1.24953	1.171	1.32807	0	-3.87412	-5.25559	-2.2853	-1.16783	0	-2.77642	0	0	-6.10858	-4.14326	0	-1.98153	-3.03316	0	0	0	-2.63184	-2.29748	0	0	0	0	-3.2407	-1.40801	0	0	0	-1.69071	-2.72298
GUAUUU	GUA_d0	0.320285	0.180689	0.459881	1.06298	0.732043	1.39391	0.541794	0.121496	0.962093	4.15814	3.22333	5.09296	1.29712	1.18864	1.40561	1.17301	1.13208	1.21394	-1.19217	0	0	0	-3.42801	-6.42933	-6.73061	0	-1.11048	0.319667	-5.58081	-9.87424	0	-1.09376	0	-1.23932	-1.54564	-0.773055	0	-2.06212	-0.0382775	-0.772531	-0.545967	-4.27683	-4.82774	-1.68815	0	0	-4.80136	-1.02714
GUUAAU	NA	0.97198	0.751926	1.19203	3.80974	3.44818	4.17131	0.410074	0.100915	0.719233	4.57032	3.6544	5.48623	0.478301	0.314501	0.6421	0.379617	0.29283	0.466403	0	0	0	-3.33321	-2.0126	0	-0.170113	-1.54917	-1.81392	-1.13856	-2.15322	-2.27317	-2.7729	-1.74705	-1.24124	-1.1839	0	0	0	-3.13715	-1.81973	-3.39729	0	0	1.26522	-0.715406	-3.53317	-3.44729	-2.5377	0
GUUUAA	NA	0.739112	0.553143	0.92508	3.20301	2.48033	3.92569	0.805442	0.435618	1.17527	4.19476	3.20544	5.18407	0.745923	0.587723	0.904122	0.65502	0.587081	0.72296	-2.21954	-2.47357	-4.43399	-1.14547	2.13723	-0.210463	-2.89701	0	0	0	-1.82048	0	0.0346865	0	0	-2.17893	0	0	-3.61464	0.0087306	0	0.838333	1.38938	0	0	0	-0.838692	0.364506	0.824506	0.207881
GUUUAG	UAG_d0	1.20474	1.06692	1.34256	1.32466	0.871329	1.77798	0.316564	-0.360226	0.993355	3.80681	2.75624	4.85738	0.834235	0.575515	1.09295	0.668726	0.582882	0.75457	-3.39921	-3.72273	0	0	0	0	0	0	0	-0.929692	0	0	0	0	0	0	0	0	0	0	0	-0.637641	0	0	0	-1.14275	0	-1.46701	0	0
GUUUAU	U-rich_d2	0.763895	0.664931	0.862859	1.85279	1.39008	2.3155	1.6014	1.31188	1.89092	3.85901	3.18476	4.53325	1.14444	1.00369	1.28519	0.651716	0.593823	0.70961	0	-3.9888	-0.267682	-1.64679	0.23128	0.0119316	-1.72443	-2.63828	0	0	-1.41904	0	0	-0.876106	-2.01238	0	0	0	0	0	-0.976153	0	0	0	-0.370675	-3.30199	0	0.140709	0	-0.408372
GUUUCU	U-rich_d2	0.650936	0.567376	0.734496	0.949519	0.581262	1.31778	1.82376	1.57927	2.06826	1.00705	0.140578	1.87352	0.878901	0.615177	1.14263	0.322284	0.257617	0.386951	0	0	0	0.725905	2.38951	0	0	0.999393	7.07779	1.15634	2.43102	4.82617	2.4806	0	0.2682	0.333375	1.6699	2.95093	1.77076	0	1.7634	1.82305	3.58464	0.743467	0	0	0	0.652673	0	0
GUUUUA	U-rich_d2	0.876601	0.759203	0.994	1.97977	1.60177	2.35778	1.49779	1.17415	1.82143	4.2387	3.61252	4.86489	1.10697	0.909388	1.30455	0.615993	0.567604	0.664382	-2.12243	-0.870784	-0.110548	-3.54302	-1.32199	-0.339737	-2.16874	1.19639	0	-0.157027	-1.26724	-0.336723	-4.34398	-0.141741	0.531848	0.197578	-0.958829	-1.48884	0	1.12721	-1.96004	0.700706	1.76741	-0.600343	0.448054	2.03055	0.355659	0.513867	0.0281228	0
GUUUUG	U-rich_d2	0.564569	0.497366	0.631772	0.328933	0.0058211	0.652044	1.40281	1.207	1.59863	0.826217	0.424143	1.22829	1.18186	1.0228	1.34092	0.605652	0.523027	0.688277	0.982104	0.582459	-0.265477	3.82583	1.6682	4.59153	1.68258	3.47408	0	4.05251	1.21885	1.75916	2.12049	-0.506024	-0.313663	5.36713	1.3328	0.398986	2.20849	1.72375	0	2.32934	1.78725	0	11.3916	1.43141	1.49328	-0.306469	0.841688	2.88654
GUUUUU	U-rich_d1	0.834972	0.763383	0.906562	1.28302	0.948406	1.61764	2.31901	2.15637	2.48165	1.80862	1.39478	2.22246	1.35829	1.21315	1.50344	0.630581	0.587187	0.673975	1.21159	0.773054	1.99277	0.33191	-0.531106	1.95858	0.76004	6.2269	-0.623484	0.9036	-3.13475	2.0146	0.290168	-0.901083	1.19966	2.87065	1.78152	2.00926	9.56936	6.758	1.24417	3.35542	5.15666	0.6805	5.09104	3.2755	4.36181	5.75431	-0.471935	0.724111
UAAAAA	A-rich_d1	-0.332555	-0.456983	-0.208128	2.46298	1.98028	2.94569	-0.222036	-0.549877	0.105805	3.2196	2.02693	4.41227	0.714767	0.500965	0.928569	1.03947	0.947538	1.1314	-6.05732	-1.46027	-8.03501	-3.45045	-2.70117	-7.94405	-5.63386	-2.28966	-4.8813	-4.65828	-4.04995	-1.64925	-4.43574	-2.56872	-4.7577	-5.15803	-4.01403	-3.37497	-3.65413	-1.55913	-2.83171	0	-2.65243	0	-2.65428	0.069317	-0.255741	-8.23217	-5.35598	-1.63296
UAAAAU	A-rich_d2	0.0956467	-0.0755411	0.266834	3.05813	2.33019	3.78606	0.0618676	-0.3772	0.500936	3.91384	3.19334	4.63434	0.933379	0.708949	1.15781	1.03055	0.921917	1.13919	-5.08927	-3.92367	-9.50344	-3.8499	-7.37388	-6.90591	-1.51134	0	-2.15044	-0.768661	-5.5141	-6.31403	-5.32772	-1.60263	-3.59294	-3.7337	-1.76557	0	0	-4.32439	-4.98883	-3.65399	0	-8.06017	-4.75812	-1.70944	-7.16102	0	-3.40101	0.282505
UAAAUA	A-rich_d2	0.834727	0.581283	1.08817	4.38224	3.96587	4.79862	-0.537459	-1.06751	-0.00740996	3.58083	2.9201	4.24155	0.64043	0.134637	1.14622	1.08461	0.934456	1.23476	-4.16956	-5.25224	0	0	0	0	0	0	0	-13.0098	-12.7825	-6.77527	-8.9112	0	0	0	-4.95472	-4.65933	0	0	0	0	-5.64529	-0.410907	-5.46179	0	-3.46295	-0.524719	0	-0.825579
UAAAUU	A-rich_d3	0.612639	0.425817	0.799462	3.18539	2.86218	3.5086	0.967962	0.605653	1.33027	4.35872	3.69792	5.01952	0.850626	0.683842	1.01741	1.00459	0.918083	1.09109	0	0	-4.22875	0	0	-2.58868	0	-1.19637	0	-5.28308	-1.57909	-3.16057	0	-2.81173	0	-5.70716	-2.52726	-2.03735	-2.56485	-6.2938	0	-4.53619	0	-1.90438	-1.58568	0.130071	-9.95755	-2.60858	-3.8658	-10.5892
UAAGUA	GUA_d0	0.257667	-0.0754271	0.590761	1.30474	0.230555	2.37893	-1.57188	-2.03836	-1.10541	3.62399	2.64865	4.59932	1.13482	0.778744	1.49091	1.4918	1.37203	1.61157	-2.50359	0	-1.87811	-3.25588	-3.3143	0	0	0	-7.0138	0	0	0	-2.70565	-5.46992	0	0	0	0	-3.80451	-8.00825	-2.40086	-1.80454	-2.85245	-3.67953	0	-1.28631	-4.93518	0	-6.07263	0
UAAUAU	A-rich_d3	0.921136	0.598925	1.24335	5.12153	4.77491	5.46815	0.705205	0.16729	1.24312	3.31369	2.55204	4.07534	0.804763	0.402723	1.2068	0.869111	0.721806	1.01642	0	-10.0463	0	-3.27019	0	-8.96618	-0.409947	-5.67828	0	-6.39025	0	0	0	-5.98887	0	-5.43724	0	0	-6.99639	0	-2.24686	0	0	0	0	0	0	-2.66039	0	0
UAAUGA	A-rich_d3	0.492507	0.160095	0.82492	4.55707	4.20468	4.90946	-0.977163	-2.11055	0.156227	3.1845	2.26728	4.10173	0.525365	0.208299	0.84243	0.364144	0.221267	0.50702	-6.85891	0	-13.6849	0	-1.76094	-3.84988	0	-2.22662	-0.437775	0	-1.98276	-3.60882	-1.70984	-0.502705	-4.80058	-5.09604	0	0	0	-3.68811	0	-1.68423	0	-0.647211	-1.02171	0	-3.83833	-0.123069	0	-7.44543
UAAUUA	A-rich_d3	0.75924	0.551469	0.967012	3.7662	3.28379	4.24861	0.436579	0.121405	0.751754	3.67186	2.7752	4.56851	0.763078	0.541954	0.984202	0.94237	0.834911	1.04983	-11.4433	-7.49805	-7.31847	0	-13.6154	-10.2732	0	-3.27572	-3.76808	-1.65648	0	0	-0.364825	0	-3.45769	-6.77461	0	-3.85059	-5.8177	-2.79996	0	-2.86111	-2.11148	-1.46765	-3.77057	0	0.682417	-1.68046	0	-12.3064
UAAUUU	U-rich_d2	0.717792	0.599083	0.836502	3.52405	3.28524	3.76286	1.25575	0.982611	1.52889	5.20324	4.69978	5.7067	0.967318	0.793309	1.14133	1.05181	0.968298	1.13532	-4.86815	-2.43025	0	-13.3135	-1.94522	0	-3.42726	1.19624	0	-2.03083	-3.68671	-7.13003	-1.37391	-10.7384	-2.89916	-11.8618	-3.51404	-6.01734	-0.736232	-2.66175	-5.41246	-2.29893	-2.62789	-1.22503	-0.0742236	-2.98239	-3.07198	-4.14745	-6.07216	-1.62728
UACUUU	U-rich_d2	0.791593	0.68864	0.894547	1.7069	1.31995	2.09385	1.76268	1.51989	2.00547	4.22115	3.64051	4.80178	0.757818	0.583484	0.932152	0.425436	0.367606	0.483265	-0.233993	-0.214893	0.293996	-0.957226	0	-0.501339	-0.706598	0.989166	-0.907888	-1.48161	-3.62147	-1.94117	0	-1.03377	0	-1.85128	-2.77644	1.25757	-0.93336	-3.2442	0	0.650703	1.00008	-1.30741	-1.14497	0.499684	-2.58986	-0.622846	-0.644996	-0.229544
UAGAUA	UAG_d0	1.45535	1.21516	1.69553	3.29527	2.43072	4.15983	-0.453898	-2.23828	1.33048	2.53068	0.864453	4.19691	0.46995	-0.281071	1.22097	0.966454	0.751551	1.18136	-2.85054	0	0	0	0	0	0	0	-6.37253	0	0	0	0	0	-3.62586	-4.01284	-2.97526	0	-3.5158	-4.21841	0	0	-5.85518	-2.99643	0	0	-4.25231	0	0	-9.45533
UAGAUU	UAG_d0	1.16632	0.959123	1.37351	2.9285	2.39066	3.46634	0.53823	0.17839	0.898069	3.72699	2.61476	4.83922	0.629878	0.304934	0.954823	1.00117	0.871342	1.131	0	0	-1.62534	0	0	-1.76387	0	-2.24181	0	0	-1.96331	-2.16179	0	0	0	-2.60141	-1.94432	0	0	-1.08969	0	0	-0.307762	0	0	0	0	0	-10.8136	-12.46
UAGGUU	UAG_d0	1.19982	1.04362	1.35603	1.0399	0.433755	1.64605	0.78572	0.214942	1.3565	3.66735	3.20863	4.12607	0.488471	0.137454	0.839487	0.744558	0.563054	0.926063	0	0	-0.0502309	0	-1.29686	0.417438	0	-2.71213	0	-1.72034	0	-0.804156	0	0	0	0	0	0	0	0	0	-3.83294	-1.44015	0	0	0	0	0	-1.32951	-2.16789
UAGUAA	GUA-UAG_d0	0.754688	0.291794	1.21758	3.57933	3.02425	4.1344	-1.16673	-2.10616	-0.227291	2.72333	1.47022	3.97645	1.09586	0.910337	1.28138	1.60247	1.50896	1.69599	0	0	-4.91272	-4.87336	-9.61487	-3.72731	-5.70686	-4.68973	-4.49837	-2.79956	0	-9.18463	-5.00735	0	-4.77291	0	0	0	-2.34869	0	0	0	0	0	0	0	0	0	-4.00779	0
UAGUAG	GUA-UAG_d0	0.437034	-0.00762341	0.881691	0.726389	-1.84972	3.3025	-1.34047	-2.18532	-0.495618	1.85754	0	0	1.49359	1.07661	1.91058	1.63597	1.50995	1.76199	0	0	0	0	-7.01244	0	0	0	0	-7.05521	-4.75644	0	-5.66262	0	-1.38032	-8.06584	-5.45068	0	0	0	0	-8.94319	-5.05883	0	0	0	0	-4.8903	-6.37421	0
UAGUAU	GUA-UAG_d0	0.469895	0.250001	0.689788	2.09055	1.25818	2.92292	-0.421059	-1.30891	0.466789	1.5597	0.846948	2.27245	1.01866	0.722072	1.31524	1.30497	1.20168	1.40826	-1.97117	0	0	0	0	-3.98086	-3.70121	0	-3.47932	-2.36596	0	0	0	-7.06448	0	0	0	-4.5333	0	-6.3206	0	-1.81871	0	0	0	-5.38774	-5.5639	0	-3.60066	-2.07431
UAGUUA	UAG_d0	1.69747	1.33565	2.05929	3.392	2.89048	3.89353	-0.20703	-0.720682	0.306622	3.40667	2.63276	4.18057	0.637517	0.339394	0.93564	0.958955	0.836341	1.08157	0	0	-3.61417	-7.04266	0	-1.2062	0	-0.938083	-2.2773	0	0	0	0	-1.83646	0	-2.20083	-6.67005	0	0	0	0	-1.76878	0	-2.84366	0	0	0	0	0	0
UAGUUU	UAG_d0	1.34959	1.19414	1.50505	2.43556	2.09558	2.77553	0.982945	0.684109	1.28178	4.28162	3.63246	4.93079	0.947509	0.779162	1.11586	1.12854	1.03206	1.22501	0	0	0.60703	0	-4.6532	0	-1.7395	0	-2.15998	0	-2.8298	0	0	0	-0.200751	0	-6.2828	0	-1.49199	0	-4.11357	0	-0.907836	0	0	0	0	0	0	-5.48983
UAUAAA	A-rich_d2	0.474337	0.173933	0.774742	3.58819	3.12037	4.05602	-0.385698	-0.812724	0.0413276	2.94818	2.2594	3.63697	0.688769	0.368333	1.0092	0.868393	0.765585	0.9712	-7.98469	0	-7.18016	0	-4.48758	-2.8707	-4.7502	0	-6.12535	0	-10.1089	-1.86274	0	-1.47598	-11.4283	-3.46167	-3.67182	-2.6772	0	-4.0229	-3.96452	-2.03166	-0.874631	-1.19222	0	-0.566413	0	-6.5602	0	0
UAUAGA	UAG_d0	1.12362	0.867026	1.38021	2.53007	2.12519	2.93495	0.0531307	-0.400699	0.506961	1.70973	0.300901	3.11856	0.661839	0.38265	0.941028	0.634493	0.521351	0.747635	0	-1.4295	0	0	0	0	0	0.0487637	0	0	0	-2.07735	0	-4.01284	0	0	0	0	0	0	0	0	-1.50094	-2.46296	0	0	0	-2.17547	-5.29976	0
UAUAGU	UAG_d0	1.21732	0.969576	1.46506	2.43394	2.08247	2.78542	-0.466986	-1.34885	0.414877	3.70179	2.82386	4.57971	1.06785	0.769036	1.36666	1.19003	1.06663	1.31344	0	-4.37468	-12.3002	0	-3.81047	-2.35892	-2.99387	0	0	-5.77014	0	0	0	-4.24094	0	0	-4.12955	0	-6.7084	-5.6144	-5.25592	0	0	0	-1.28167	-2.4055	0	-3.45674	0	0
UAUAUA	A-rich_d3	0.553465	0.404757	0.702173	3.36736	2.86687	3.86785	0.495412	0.129923	0.860901	2.83467	2.36002	3.30932	0.684774	0.501782	0.867767	0.682596	0.613014	0.752177	0	0	-5.69474	-5.99859	-7.83687	-6.24119	0	-4.31309	0	-2.91138	-2.46147	-8.19092	0	0.188476	0	-3.84669	0	-4.94858	-9.63063	-0.0697949	-5.85932	-1.81219	0	-4.55443	-6.75109	-8.67097	-5.82929	-3.37474	0	-2.46969
UAUAUU	U-rich_d2	0.65422	0.527943	0.780496	3.01813	2.65706	3.3792	1.51318	1.2097	1.81667	3.91002	3.56513	4.25491	1.16077	0.963427	1.35811	0.817802	0.742043	0.893562	0	-1.09999	-3.47139	-7.69472	-8.16697	-1.42828	-1.79583	-2.98452	-2.18873	-1.83005	-4.29252	0	0	-3.53362	-7.14592	-1.75603	-3.29514	0	0	-3.37994	0	1.34662	-0.187202	-1.47483	0	-3.78878	-1.40523	-1.26686	-1.87633	0
UAUGUA	GUA_d0	0.15448	-0.062172	0.371131	0.997925	0.558914	1.43694	0.00655987	-0.672271	0.685391	2.88697	1.88491	3.88903	1.70944	1.47381	1.94508	1.48297	1.37396	1.59197	-4.03966	0	0	0	-3.95152	0	0	0	-3.17871	0	-4.29198	-2.1348	-4.83671	0	0	-2.52818	-3.73921	0	0	0	0	0	0	-5.14421	0	0	0	0	0	0
UAUUAA	A-rich_d3	0.487591	0.27049	0.704691	4.17885	3.77892	4.57878	0.564209	0.242	0.886418	3.54694	2.77699	4.3169	0.799849	0.633536	0.966163	0.729121	0.656675	0.801567	-3.15156	0	-11.9351	0	-2.45312	0	-5.27268	-2.11111	-4.68805	-5.08632	-9.82441	-13.7115	-9.48298	-7.89244	-2.56883	-8.34913	-15.7757	-7.08045	-6.53326	-2.11735	-2.21875	-3.97543	-2.34895	-3.78628	-11.2049	-1.67412	-10.1216	-2.72927	0	-1.5657
UAUUAG	UAG_d0	1.1141	0.934934	1.29328	2.08823	1.61383	2.56262	0.0428779	-0.351151	0.436907	2.31809	1.84597	2.79021	0.80837	0.583881	1.03286	0.879037	0.780529	0.977545	0	0	0	0	-3.00193	0	0	0	0	0	0	0	-4.25184	0	-2.90688	0	0	0	0	0	0	0	-1.54742	0	0	0	0	0	-1.89214	0
UAUUAU	U-rich_d2	0.558803	0.417466	0.70014	3.07047	2.71804	3.4229	1.35816	1.08356	1.63276	2.5474	2.11196	2.98284	1.01198	0.880532	1.14343	0.694111	0.633626	0.754595	-1.94556	-0.396949	-5.1359	-10.7543	-2.35032	-2.61245	0	0.071285	-3.48683	-0.945733	0	-3.51107	-4.61879	0	-3.49971	-5.20428	-9.09377	-2.61989	-1.74516	-1.18104	-3.32114	-5.27709	-0.0997316	-4.96853	-2.68236	-5.16611	-0.795695	0.353751	-3.28458	-3.6847
UAUUGU	U-rich_d2	0.476938	0.368144	0.585731	1.00657	0.74569	1.26744	1.20963	0.885829	1.53342	2.76454	1.50179	4.02729	1.54342	1.349	1.73785	1.45946	1.33516	1.58375	0	0	0.0802712	0.53389	0	0.544754	-5.44259	0	-1.20932	0	0	-1.74785	0	-0.354878	0	0	-1.90436	0	-1.91149	0	-0.394312	-0.0617328	1.97456	0	0	-0.76424	0	1.11827	0.0106519	-1.01242
UAUUUA	U-rich_d2	1.03462	0.888703	1.18053	3.05468	2.70359	3.40577	1.30361	1.07006	1.53716	4.65323	4.222	5.08446	1.07045	0.898859	1.24204	0.751528	0.694175	0.808881	-2.0016	-2.73339	0	-2.47614	-2.33633	-0.360657	-12.1152	-4.56122	0	-2.53051	-2.91067	-5.71498	-5.12306	-4.45694	0	0	-6.06591	0.208707	-0.439355	0	-0.559711	-3.74496	-4.18063	-0.982135	-2.39684	-0.944547	-5.81238	-4.35782	0	-5.83404
UAUUUG	U-rich_d2	0.267797	0.186909	0.348685	1.61693	1.01325	2.22061	1.2428	1.01252	1.47309	4.44967	3.93806	4.96128	1.14832	0.993422	1.30322	0.880061	0.799637	0.960484	0	-0.999021	0.337948	-0.00393424	0.309962	-1.1118	-1.84987	-2.34501	1.77576	-0.681819	-1.98615	-0.00729247	-2.55801	0	-0.767615	-1.14166	-1.88327	-0.667725	0	0	-1.20568	0.444957	-0.827828	0.549804	-2.44582	-2.54702	-0.0553707	1.3839	-1.25094	-1.44612
UAUUUU	U-rich_d1	0.724576	0.646173	0.802979	2.01104	1.81189	2.21018	2.3301	2.19073	2.46946	5.13377	4.77689	5.49065	1.24216	1.10534	1.37898	0.799222	0.752569	0.845874	-1.40308	-2.45538	-4.46988	-1.53973	-2.14834	-2.40976	-0.648751	-3.89375	0.438091	-4.00911	-9.25009	-9.18458	-9.16025	-4.89161	-3.34062	-3.29299	-3.6336	-6.75118	0.578436	-2.13397	1.62664	0.659685	-0.582698	1.47	-0.420543	-0.668362	-1.40528	1.24966	-0.661363	-2.97855
UCAUUU	U-rich_d2	0.389374	0.312042	0.466707	1.39978	1.13474	1.66483	1.86672	1.69825	2.03519	4.61399	4.11537	5.11262	0.993344	0.823115	1.16357	0.450195	0.408355	0.492036	-0.964276	0.829983	0.253242	-2.6676	-1.18409	0	1.74236	-0.221607	-0.469262	-7.01072	-3.90725	0	1.00623	-2.48711	-0.411216	-0.503674	1.83911	0	-0.375562	0.94406	0	1.36598	0.64323	1.1588	2.09019	0	0	1.34946	0.323739	0.344869
UCCUUU	U-rich_d2	0.489173	0.425903	0.552443	0.403408	0.165443	0.641374	2.00301	1.76699	2.23903	3.20866	2.62048	3.79684	1.27083	0.990338	1.55131	0.249995	0.19604	0.303949	1.5034	0	2.00267	0	0	0	0	3.2063	1.62114	2.30488	0	7.31381	1.03136	2.46695	-1.29058	1.27281	3.0557	1.23496	2.76974	4.82593	6.10537	5.19176	4.03575	6.20634	3.78656	2.06391	2.49179	3.0406	0	4.16946
UCUUCU	U-rich_d2	0.442089	0.367867	0.516311	0.311323	-0.248545	0.871191	1.96847	1.69935	2.23758	2.20407	1.61088	2.79726	1.02267	0.79591	1.24944	0.102905	-0.00644648	0.212257	0.496398	0	0.837169	0.83784	0.960597	1.59012	1.03933	0.861855	1.23451	3.45112	0.490754	1.45708	1.45037	0	0	0	2.37341	1.76037	0.457716	2.06548	1.6349	2.51934	1.14745	0	1.38771	1.06295	1.195	2.25905	-0.76044	2.00816
UCUUUA	U-rich_d2	0.725356	0.611051	0.83966	2.01558	1.31118	2.71998	1.49249	1.1838	1.80118	4.8455	4.18682	5.50418	0.985971	0.74115	1.23079	0.471907	0.423418	0.520397	-4.61145	-0.557413	-2.00823	1.47543	-0.688614	-1.47535	-4.3987	0	0.719735	-2.59793	-0.379506	-0.765315	-0.969902	-0.633942	0	-5.30126	-0.504853	-0.944088	-0.349883	-0.0597068	-0.72932	-0.568181	3.28294	0.619847	0.266608	-0.254941	-1.00198	-2.6552	-0.52636	-1.81509
UCUUUG	U-rich_d2	0.429744	0.360556	0.498932	0.227537	0.0427133	0.412361	1.31037	0.971759	1.64898	1.38805	0.690861	2.08523	1.44224	1.14092	1.74357	0.567637	0.42186	0.713414	5.68976	0.404271	3.67122	3.34203	3.95384	2.94138	0	0	2.20115	4.38522	0	7.16698	1.5341	1.94819	0	5.69123	2.84102	2.14506	0.230817	3.96226	5.13451	4.20495	4.73825	5.73044	0	0.703187	3.83219	2.93873	1.02761	1.48915
UCUUUU	U-rich_d1	0.669643	0.617417	0.721869	0.79193	0.542546	1.04131	2.45914	2.33432	2.58395	2.59459	2.24973	2.93944	1.44533	1.23202	1.65865	0.474086	0.431023	0.51715	0.197937	3.39561	2.23664	2.91202	2.54606	1.74378	5.14986	2.38419	0.687295	0.994742	0.883599	1.97064	1.49951	-1.55242	-1.76755	8.60685	2.92861	-0.209607	3.14193	2.32004	7.19598	2.41899	3.37257	4.16381	2.56246	2.10041	5.6507	2.12533	0.649329	0
UGAAGA	A-rich_d3	-0.284543	-0.380296	-0.18879	0.585324	-0.197582	1.36823	-0.793842	-1.35675	-0.230937	0.832931	-18.6924	20.3583	0.19752	0.022989	0.372051	0.0602303	-0.0290991	0.14956	2.55196	0.351654	5.00597	10.9515	2.7217	9.1077	12.2099	3.78527	10.5296	2.04644	-0.368426	11.182	8.53516	10.7655	10.9184	5.12295	4.00234	-0.167362	13.6551	7.1296	16.323	7.61463	4.64777	3.80161	2.27587	5.62036	10.7816	0	10.7777	10.3843
UGAAGG	NA	-0.053975	-0.214643	0.106693	0.745248	-3.97373	5.46423	-0.666867	-1.21114	-0.122599	2.79215	0	0	-0.3547	-0.994507	0.285107	0.0219363	-0.0814409	0.125313	0	0	9.40604	2.71835	3.45414	16.6328	3.92063	1.76913	2.46816	0.796677	5.62967	0	9.44559	1.78173	0.775861	0	0	3.30859	0	0	2.85133	2.88802	3.71093	5.36576	0	6.70661	6.28379	1.77447	2.73318	3.07429
UGAUGA	NA	-0.0649494	-0.12321	-0.00668876	0.571268	-0.288898	1.43143	-0.0497099	-0.40505	0.30563	1.22929	0.520552	1.93803	0.0652852	-0.163536	0.294107	0.0185384	-0.0383517	0.0754284	2.58105	2.78925	3.81299	1.05024	2.77872	0.613621	0	0.631575	6.60125	4.24115	1.81157	2.09466	3.3786	1.94619	4.38416	0.757353	2.87342	1.40182	4.54221	3.39449	4.14105	3.74987	3.6322	4.65985	4.36953	0	5.49526	4.50212	1.61289	0
UGCUGA	NA	0.112355	0.014058	0.210653	0.160242	0	0	0.422889	-1.11831	1.96409	0	0	0	0.238178	0.0453919	0.430963	0.00672179	-0.0576416	0.0710852	-0.0711723	1.96134	4.77209	1.60109	6.91744	3.53	-0.368625	5.57141	3.43009	6.61851	8.81645	11.9062	3.92667	0	5.95708	0	3.48211	13.3735	1.03439	3.33581	5.61922	5.86685	5.41353	1.36244	0	5.8031	2.77336	3.31424	4.36758	2.69471
UGCUGC	NA	0.146104	0.0773813	0.214826	-0.471136	-1.01633	0.0740526	-0.263873	0	0	0.253566	0	0	0.408405	0.0651361	0.751675	-0.0768739	-0.282053	0.128305	2.08548	4.62504	2.79189	1.97368	18.6829	5.30455	1.02878	8.16945	3.20175	3.73156	5.62253	2.18874	0	6.49659	2.49746	4.61119	0	8.09519	5.36089	4.64724	0	7.7231	0	8.75243	4.22254	0	2.50133	2.04135	3.22076	3.16038
UGCUUU	U-rich_d2	0.587275	0.525628	0.648921	0.538874	0.200337	0.877411	1.72447	1.5799	1.86903	1.61283	1.23164	1.99403	0.859142	0.71064	1.00765	0.323383	0.279971	0.366794	0.665037	3.33764	4.62223	7.50679	3.03453	0.679289	6.51096	9.90654	0	3.41969	0	4.55029	0	-0.423073	3.30345	0.454668	0	4.17307	6.13161	6.30407	4.87151	1.17513	2.13429	0.0458254	1.35814	2.23388	3.66281	0	-0.52543	1.41335
UGGAAA	A-rich_d3	-0.248049	-0.353103	-0.142994	0.728187	0.00248325	1.45389	-0.450634	-1.34508	0.443814	2.05045	1.32179	2.7791	0.0876738	-0.0976496	0.272997	0.093671	0.0268782	0.160464	-0.0932886	1.43801	1.45931	3.29865	0	2.4596	1.9851	0.964779	1.24609	0.559225	1.90442	2.26656	0	2.15923	2.3199	7.4017	4.16697	3.12575	1.83534	4.0806	0.423939	6.02081	0	0	6.09819	1.78853	0.247281	3.27692	1.74733	0
UGGUGC	NA	0.166596	0.0717984	0.261393	0.0709173	-3.0324	3.17423	1.00889	0.247218	1.77056	0.19355	0	0	0.0788989	-0.482327	0.640125	-0.108619	-0.210327	-0.00691119	2.24026	2.20097	0.937256	2.20941	2.16371	4.54894	6.80862	4.71879	0.598523	2.75729	0	9.6212	7.37774	2.88163	1.85937	0	2.12422	10.6505	0	4.63483	5.64645	2.2327	0	1.59712	0	0	3.9667	7.50137	1.87867	0
UGGUUU	U-rich_d2	0.777191	0.708169	0.846213	0.547969	0.318592	0.777346	1.69746	1.51263	1.8823	1.21803	0.685377	1.75069	0.877276	0.689615	1.06494	0.281615	0.235693	0.327536	0.463076	1.12901	3.2513	1.63999	4.9784	1.89276	0.976932	3.69333	5.56329	0	5.10964	2.19025	1.26863	0	5.32842	1.69394	2.58955	1.28449	3.00046	3.54848	0	5.72064	4.77114	0	0	3.1144	1.43627	2.78143	3.8468	3.49645
UGUAAA	GUA_d0	-0.387693	-0.611524	-0.163863	1.80354	0.804	2.80309	-0.786049	-1.47007	-0.102032	2.8523	1.75008	3.95453	1.61304	1.51019	1.71589	1.68394	1.62953	1.73834	-3.17611	0	-4.44065	-3.08683	-6.6252	-1.80886	-6.53554	-0.430946	0	-0.537902	0	0	-3.157	-9.06257	-1.68893	0	-3.86549	-5.03947	-1.73048	-2.33369	-6.25497	-3.23007	-1.47207	-2.13264	0	-1.20002	-3.85101	0	-1.10395	0
UGUAAG	GUA_d0	-0.678551	-0.889077	-0.468025	-0.549357	-7.56597	6.46725	-0.826881	-7.60832	5.95456	2.9883	-0.720116	6.69671	1.6003	1.31108	1.88951	1.48919	1.41921	1.55917	0.20121	-6.78872	0	0	0	0	0	-4.9333	0	0	0	-2.69139	0	0	-2.16632	0	0	0	0	0	0	-3.57485	0	0	0	-2.72242	-2.66168	-4.43587	-1.42341	0
UGUAAU	GUA_d0	-0.291388	-0.537508	-0.0452671	2.22087	1.7151	2.72664	-0.165053	-0.760664	0.430557	2.9242	1.57491	4.27348	1.57009	1.32778	1.81239	1.58603	1.52219	1.64987	0	0	-4.96859	0	-5.78901	0	0	0	0	0	0	-3.2925	-4.32925	-8.11087	0	-6.5717	0	-4.6426	-3.69363	0	-2.93139	-1.34586	0	0	0	-1.12941	0	-5.38081	0	0
UGUAGA	GUA-UAG_d0	0.290064	0.00324516	0.576884	0.18899	-1.06128	1.43926	-0.516195	-1.11521	0.0828168	2.17165	0	0	1.49831	1.31903	1.67759	1.54885	1.48006	1.61764	0	0	0	0	-1.09802	0	0	-2.85064	0	0	0	-2.9786	0	-3.55014	0	0	-4.26657	0	-2.39367	-6.97067	-4.32704	0	-3.30046	0	0	0	-2.33117	-7.70412	0	-0.962406
UGUAGU	GUA-UAG_d0	0.226157	-0.0187191	0.471033	0.421557	-0.318081	1.16119	-0.84988	-2.04559	0.345832	0	0	0	1.50604	1.31296	1.69912	1.78764	1.70655	1.86872	-1.73228	0	-9.76718	0	0	0	-2.37751	-6.61387	0	0	0	0	-2.83455	-7.21317	-3.38388	-3.57667	0	0	0	-8.36253	0	-1.68764	0	0	-3.21404	0	-7.20609	0	0	0
UGUAUA	GUA_d0	0.184195	-0.0271778	0.395567	1.21844	0.54682	1.89005	-0.0115765	-0.870343	0.84719	2.86871	2.02395	3.71348	1.43738	1.32594	1.54881	1.38653	1.31367	1.4594	-2.21732	-4.93359	0	-1.63448	0	-1.92685	-4.4741	0	0	-4.49936	0	0	-3.99694	-5.27055	-1.34762	-9.05718	-2.17709	0	-1.28085	0	-6.59647	0	-2.50594	0	0	-1.47399	-2.56689	0	0	-3.48787
UGUAUU	GUA_d0	0.119405	-0.0558172	0.294627	1.60228	0.898606	2.30595	0.57665	0.239483	0.913817	3.00799	1.75671	4.25927	1.43312	1.31859	1.54766	1.27792	1.23612	1.31972	-1.55763	0	0	-0.950808	-4.41934	-2.16833	0	-2.27799	-4.78341	-5.1143	-6.91113	-3.08055	0	0	-4.45247	0	-1.58546	0	-5.09489	-3.89243	-1.43845	-0.454336	-2.29637	-1.26546	0	-1.44561	0	0	0	-0.605236
UGUUGA	NA	0.227072	0.138434	0.315709	0.608906	-0.0644583	1.28227	0.953655	0.0585331	1.84878	2.36379	1.14145	3.58612	0.757036	0.643571	0.8705	0.364745	0.310383	0.419107	-0.219031	0.381811	0.545197	7.54946	4.34497	1.52573	1.21558	3.66855	2.42619	8.9364	0.590175	3.5585	1.01505	1.36355	0	0.974598	6.44302	6.34794	4.3518	8.4955	2.84725	8.47612	0	3.23052	0	6.09831	4.01646	2.70892	0	2.40448
UGUUUA	U-rich_d2	0.704818	0.610557	0.79908	1.72377	1.32026	2.12727	1.74145	1.42554	2.05735	3.57307	2.88664	4.2595	1.15782	1.0072	1.30845	0.640787	0.590974	0.6906	-1.06168	-1.23341	-0.637832	1.51936	0.121151	-1.84946	-0.400817	0	0	0.400488	0	-0.39727	0	0	-2.07172	0.411727	-0.40121	-1.409	0	0.229062	0.0914092	0.931017	0.831134	0.712704	-1.30369	0	0.161811	0	0.629012	0
UGUUUC	U-rich_d2	0.399319	0.343078	0.455559	0.624944	0.288581	0.961308	1.87719	1.68195	2.07242	1.28007	0.432669	2.12746	1.06808	0.830107	1.30605	0.370716	0.314368	0.427064	0.361574	0	1.61151	3.36437	0	1.07912	0.0432482	3.3035	1.84087	2.17479	1.70937	3.58313	0.701918	0	1.53909	0.900569	1.39317	2.03851	1.09887	0	0	3.34209	0.291724	0	0.206927	0	2.06277	0.550934	0	0.656282
UGUUUU	U-rich_d1	0.702912	0.637239	0.768586	1.13684	0.920081	1.3536	2.23635	2.09611	2.37658	1.83991	1.54879	2.13103	1.34283	1.21887	1.46678	0.64857	0.60953	0.687609	-0.978123	1.02012	-0.90462	1.00937	3.51397	0	4.586	0	3.56057	-1.88975	3.20547	-3.12981	-1.61235	1.0195	3.02712	0.154164	0.583252	3.42526	2.58188	-0.0986387	2.41247	4.58528	0.825376	3.81134	6.20849	4.76048	2.87597	4.14977	1.641	0.144342
UUAAAA	A-rich_d2	0.0955878	-0.0144758	0.205651	2.45407	2.11721	2.79093	0.4708	0.126906	0.814694	3.74814	2.86442	4.63186	0.689213	0.514839	0.863587	0.7193	0.68302	0.75558	-2.7995	-7.82863	-8.7032	-3.08795	-14.0944	-3.11317	-3.86285	-8.2677	-4.60834	-9.78363	-4.72311	-4.03816	-3.94742	0	-10.2743	-1.64601	-2.13399	-2.27152	-2.98986	-5.84229	-1.10197	-0.335707	0.794206	0.731404	-3.1419	-5.56516	-0.543487	-3.14977	0.837019	-0.128946
UUAAAU	A-rich_d3	0.735466	0.548276	0.922655	3.83346	3.4519	4.21502	0.829288	0.582746	1.07583	4.51636	3.89916	5.13356	0.846949	0.585776	1.10812	0.701778	0.651418	0.752138	0	-5.9361	0	0	-1.61513	0	-0.845505	-2.05136	-3.38845	-2.90851	-3.76183	0	-1.62706	-1.99117	-10.6731	-3.54671	-2.17134	-2.10813	-5.44632	-0.785012	-5.06158	1.13513	-2.07709	-5.67999	-3.829	-6.92805	-2.31667	-3.59146	-7.09711	-2.38487
UUAAUA	A-rich_d3	1.31621	0.987885	1.64454	5.14508	4.82056	5.46959	0.218217	-0.13595	0.572385	3.91059	3.39109	4.43009	0.786198	0.491843	1.08055	0.488931	0.380884	0.596978	-4.74726	0	-4.53063	-4.27227	-1.58281	-3.12688	-6.16189	0	-5.80749	-6.39115	0	-3.28264	-7.35881	-2.49636	-5.99319	0	-4.97663	-4.67208	-4.46779	-3.06325	0	-3.1672	-8.23288	0	0	0	-5.98287	0	-1.9453	-0.508062
UUAAUG	NA	0.62093	0.388495	0.853365	4.08093	3.74547	4.41638	0.507586	0.256588	0.758585	3.03961	0.689839	5.38939	0.798212	0.569435	1.02699	0.350818	0.24983	0.451805	-1.86151	-4.1648	-7.70474	0	-0.0289723	-1.99262	0	0.810058	-3.09782	-2.83154	-1.07966	-1.24542	-0.489641	-4.12292	0	-3.37881	0	0	0	-1.17054	-3.32127	0	-1.88374	-0.765878	-0.687144	0	0.118813	-4.0059	-4.79956	-1.35317
UUAAUU	U-rich_d2	0.882452	0.744998	1.01991	3.69645	3.46425	3.92865	1.13037	0.936462	1.32428	5.30538	4.72503	5.88572	0.911461	0.768018	1.0549	0.584728	0.540158	0.629299	-6.49477	-3.66811	-6.52785	-12.9448	-3.87323	-2.3914	-5.07172	-3.54865	-4.61262	0	-7.45519	-2.02459	-2.02137	-5.30303	-12.2075	-3.45242	-1.14826	-6.15272	-4.89926	-2.59723	-6.3861	-1.99185	-1.5491	-2.8134	0	-1.99577	-4.52541	-2.48257	-9.59978	-7.80086
UUACUU	U-rich_d2	0.834437	0.722889	0.945985	1.5558	1.07465	2.03694	1.5938	1.38906	1.79853	4.57562	3.99243	5.15881	0.809965	0.587277	1.03265	0.340811	0.301611	0.380011	-0.404105	0	-2.81759	0	-0.462866	-0.731241	1.25756	0.331616	-2.34311	-1.99027	0	0	-1.91926	-2.00759	-1.55241	0	-1.45763	-0.321352	-0.778458	0.141265	-0.184463	0.0642251	0.499303	0.784577	0.768519	0.426529	-0.746963	0	-1.25177	0
UUAGAU	UAG_d0	1.43243	1.23195	1.63291	2.2426	1.54627	2.93893	0.361777	0.0490033	0.67455	4.26925	3.62779	4.91071	0.658074	0.249389	1.06676	0.593714	0.535107	0.652321	0	-1.675	0	0	0	0	0	-1.6654	0	0	0	0	0	-2.06014	0	-2.58218	-1.90248	-2.66013	-0.580391	0	0	-0.417556	-3.14616	0	0	0	-1.515	-2.47183	-5.39123	-1.68078
UUAGGU	UAG_d0	1.24957	1.10224	1.39691	0.635908	0.267005	1.00481	-0.0125145	-1.12859	1.10356	2.44476	-0.352648	5.24217	0.874065	0.46813	1.28	0.531092	0.420519	0.641666	0	0.960561	0	-1.28802	-0.168433	0	-0.109287	-4.03807	-3.99088	0	-0.885659	0	0	0	-2.13736	-4.97108	-1.97089	0	-1.10416	0	-5.20356	-4.03628	0	0	-3.31269	0	0	-1.93643	0	-2.80638
UUAGUA	GUA-UAG_d0	0.851588	0.62599	1.07719	2.05231	1.23716	2.86746	-0.519003	-0.931887	-0.106119	2.70534	1.81395	3.59674	1.33141	1.0945	1.56833	1.28378	1.21113	1.35644	0	-3.54641	0	-3.91305	-2.42689	0	0	-4.19821	-6.95707	0	0	-11.4909	-3.16778	-1.34436	0	-5.63099	0	-2.43259	-3.14145	0	-1.89717	-4.82079	0	0	0	0	0	-6.79797	0	0
UUAGUU	UAG_d0	1.59835	1.42899	1.76772	2.48525	2.11546	2.85503	1.05177	0.802162	1.30138	3.56081	2.81709	4.30453	0.769327	0.595651	0.943002	0.686133	0.637298	0.734967	0	-3.03585	-4.18397	0	-4.53332	0.0505381	-1.10282	-1.54561	0	0	0	0	-1.22927	0	-1.13283	-2.69611	-0.238587	0	0	0	-4.43602	-0.184073	0	0	0	0	0	-1.50293	-2.72914	-4.45804
UUAUAG	UAG_d0	1.29484	1.09319	1.4965	2.39691	1.99509	2.79873	0.145567	-0.135959	0.427093	2.02832	0.193262	3.86337	0.902547	0.563844	1.24125	0.717302	0.619402	0.815202	-4.20688	0	0	-3.54577	-1.8346	-1.91809	0.928385	0	0	0	-1.8457	0	-10.1707	-3.58271	0	0	0	-9.46978	-5.84156	0	0	0	0	-1.88493	-2.05767	0	-0.865159	-2.40925	0	0
UUAUAU	U-rich_d2	0.780971	0.631339	0.930603	2.67596	2.3801	2.97182	1.16612	0.960846	1.37139	4.34271	3.90503	4.78038	1.24294	0.954444	1.53144	0.703629	0.657154	0.750104	-1.81183	-6.00739	-3.42265	-13.5918	-4.05695	-3.50255	-5.88715	-2.51234	-2.22725	-5.35541	-4.02333	0	-2.25871	-1.59194	-4.83831	-6.29855	0	-5.44874	0	-3.81922	-2.87984	-1.90531	-0.291815	-1.36436	-5.68171	-7.20372	-0.585859	-0.94137	-2.50474	-4.15135
UUAUUA	U-rich_d2	0.80289	0.656592	0.949189	3.0391	2.68801	3.39018	1.28949	1.0801	1.49889	3.30763	2.83246	3.78279	1.10971	0.897414	1.32201	0.591231	0.545916	0.636547	-0.74943	-5.40335	-4.65111	-2.61086	0	-2.36961	-0.450109	-3.43133	-1.40797	0	-8.09791	-2.18861	-2.16861	-5.70006	-4.03414	-0.300149	-2.21945	-6.61318	0	-0.920762	0	-1.36025	-2.37357	-1.67743	-1.59047	-6.09197	-1.3292	0.0457688	-0.283251	-8.46774
UUAUUU	U-rich_d1	0.766503	0.685116	0.847889	1.97465	1.81347	2.13584	2.13449	2.0242	2.24478	5.40415	5.04662	5.76168	1.34698	1.20841	1.48555	0.669986	0.633717	0.706255	-4.16838	-3.38688	-1.29869	-4.71716	-5.759	-3.83359	-2.51612	-1.51445	-4.44298	-16.7282	-5.30106	-3.93182	-4.30726	-2.54886	-5.68731	-9.42914	-2.45342	-1.38417	-1.8691	0.539953	-2.68195	-1.067	-0.884267	0.279054	0.861549	-0.205974	1.8689	-3.03353	-0.19949	-1.28663
UUCAUU	U-rich_d2	0.4013	0.317856	0.484744	1.5337	1.18701	1.88039	1.98573	1.82976	2.14169	4.63997	4.03147	5.24847	1.19099	0.986741	1.39524	0.425239	0.384936	0.465542	0.441434	0.0442886	-5.2854	-0.098131	-0.943176	0.688842	0.34777	-1.25423	-0.250798	-0.266289	-5.10031	0.619532	-1.79768	0.439314	-1.57136	0.633262	0	0.16803	1.44586	0.256589	1.67944	1.35861	1.17976	0.192098	1.25274	0.898635	1.11553	4.21902	0.830139	4.64493
UUCCUU	U-rich_d2	0.50806	0.451041	0.565078	0.504089	0.0383281	0.969851	2.30273	2.08996	2.51551	2.41301	1.81265	3.01338	1.32633	1.00562	1.64704	0.248846	0.202714	0.294978	0	0.943677	3.47763	-0.0517308	0.454451	0	6.94724	2.91458	3.41559	0.541797	5.3753	0	1.19218	2.3286	0	1.21971	0	0	2.75238	-0.376803	7.60424	4.96662	1.4791	3.95752	2.0785	4.58799	1.646	3.50964	3.58964	1.31192
UUCUUA	U-rich_d2	0.990816	0.834611	1.14702	1.69141	1.18868	2.19415	1.72878	1.31545	2.14211	5.45499	4.89085	6.01913	1.08119	0.866717	1.29566	0.359026	0.305008	0.413044	0	-0.358246	-0.701922	-0.681763	-2.3163	-1.61	-0.594584	0	0	-0.821399	0.0149989	-0.381266	-1.27176	-3.00861	-1.015	0	0.450734	-2.24032	-1.44538	-1.34722	0	0.395448	-1.7563	0	-1.19128	0.268834	-2.54111	1.40225	0	-3.33569
UUCUUC	U-rich_d2	0.532891	0.458917	0.606866	0.371401	-0.260039	1.00284	2.20779	1.92825	2.48732	2.18476	0.970488	3.39904	1.30663	0.988944	1.62431	0.151706	0.0789109	0.224501	2.63297	1.18711	2.1355	1.12592	0	0.592868	2.06063	1.37988	0.354325	1.40676	3.69716	7.21986	0	0.888456	0	1.32996	1.54206	3.10931	1.85689	2.85503	2.05596	0.853365	1.45313	2.67204	3.40559	1.79564	2.83116	0	3.14829	0.270539
UUCUUU	U-rich_d1	0.700414	0.64379	0.757037	0.909912	0.687147	1.13268	2.47771	2.33769	2.61774	2.31377	1.88161	2.74594	1.40174	1.22505	1.57843	0.447734	0.407221	0.488247	0.646402	1.07592	3.27423	2.52476	2.11025	0.637759	2.80375	2.37408	-4.86535	-0.00251846	11.0172	0.590922	0.446788	-1.73992	3.91127	6.97072	1.16119	-0.281421	2.74652	12.3617	2.94248	7.29396	7.78964	0	1.43954	5.04905	3.43201	3.72057	1.04857	5.96426
UUGAAA	A-rich_d3	-0.0844808	-0.193192	0.0242309	1.59993	1.21281	1.98704	0.25114	-0.0636969	0.565978	3.71018	3.1634	4.25696	0.999123	0.820795	1.17745	0.57176	0.533284	0.610235	-1.61656	-2.508	-2.7046	-0.288446	4.16159	1.10634	2.04473	-1.91115	-0.595174	-1.18692	0	1.34546	1.18427	-0.481939	-0.605026	0.906615	0	-0.391733	1.95301	1.12971	1.73219	1.64151	1.84313	-0.206403	0	0.505581	1.21857	3.93577	1.44706	1.2772
UUGAAG	NA	-0.12867	-0.215305	-0.0420337	0.369512	-0.0808009	0.819824	0.0796388	-0.115077	0.274354	1.06567	-2.28005	4.41139	0.639411	0.416324	0.862498	0.439699	0.367719	0.51168	1.79243	7.97528	1.98476	1.52286	8.37513	10.3887	1.56218	9.21131	0.207542	4.43791	6.94787	14.6748	2.02741	7.26581	3.2863	-0.821091	2.8376	13.0022	2.00313	18.0938	8.07721	5.8052	9.73126	1.86991	1.93003	12.6908	0	6.02835	5.06133	5.85703
UUGAUG	NA	0.0535167	-0.0142206	0.121254	1.09312	0.594066	1.59217	0.30266	-0.499852	1.10517	0.334759	-5.91503	6.58454	0.90801	0.670109	1.14591	0.319116	0.216105	0.422126	3.48554	2.30111	0	0	2.27034	2.80607	2.12903	4.96775	5.50881	0	3.04392	4.69417	11.1912	2.92338	2.86288	2.59171	0	1.94964	3.85395	0	0.184012	6.72337	4.77506	2.66011	2.04999	0	2.79233	1.15783	0	0
UUGCUU	U-rich_d2	0.698118	0.612187	0.784048	0.314002	-0.0770878	0.705091	1.72921	1.57441	1.88401	1.24396	0.852846	1.63507	1.16297	0.957437	1.3685	0.347018	0.301342	0.392694	0.304133	4.63907	6.52853	0.68115	0.421237	0	3.19124	0.333564	1.10423	0	2.12542	0.752831	0	0	0	1.13059	2.24803	9.00592	0	0.487278	0	1.28045	0.993457	4.26899	-0.0831125	1.9196	0	0.733802	1.56596	1.40687
UUGGAA	NA	0.048531	-0.00373641	0.100798	0.70001	-1.05563	2.45565	-0.267074	-1.0644	0.530256	2.12267	1.19164	3.0537	0.559298	0.256038	0.862559	0.187313	0.126557	0.248069	1.51428	0	2.93023	0	5.86766	0	7.01947	0.107534	1.88544	0.515917	3.84038	1.55763	4.0195	6.43288	4.37678	3.4798	2.40376	5.13412	5.43121	2.8168	5.87267	0	2.04994	8.53881	1.79665	2.46954	5.3325	1.68027	1.9348	2.91536
UUGGUG	NA	0.223729	0.139369	0.308089	0.157966	-0.395285	0.711218	0.513343	0.13312	0.893567	-0.272263	-1.40557	0.861038	0.60251	0.22617	0.978851	0.226232	0.102843	0.349621	2.7857	2.85823	0	7.17998	4.7599	8.50107	3.50414	1.29338	7.79977	0	3.81877	2.10748	3.31199	0	2.01773	2.39321	8.83744	0.659819	5.26012	5.5555	0	0.823499	6.01291	1.78063	1.46983	0	4.22384	8.9143	0	0
UUGGUU	U-rich_d2	0.737381	0.671923	0.80284	0.752923	0.382509	1.12334	1.36068	1.18659	1.53478	1.09754	0.570041	1.62504	0.965687	0.786707	1.14467	0.273398	0.224141	0.322655	2.2957	0.688068	0	5.05989	6.56372	0	5.60933	3.75661	0	3.27477	1.47022	3.27518	0	4.66742	1.3023	2.32553	3.43864	0	5.13102	3.96935	5.19205	1.84174	2.75257	0	0	2.03618	2.8437	5.98067	1.59335	0
UUGUAA	GUA_d0	-0.219346	-0.415626	-0.0230669	2.08304	1.47442	2.69167	0.269147	-0.287856	0.826151	3.48388	2.73867	4.22909	1.87962	1.74775	2.01149	1.68502	1.64094	1.7291	-3.79051	-2.605	-2.86418	-2.49305	-1.09139	0	-4.88758	0	-0.209651	0	-3.58129	0	-2.46552	-1.94494	0	0	-4.36419	-1.01934	-2.05141	-4.95111	0	0	0	0	-0.75811	0	-0.158475	-0.660823	0	-0.601917
UUGUAG	GUA-UAG_d0	0.115466	-0.0694094	0.300342	-0.538302	-1.93978	0.863177	-0.657403	-2.45997	1.14517	0	0	0	1.88111	1.66819	2.09403	1.82959	1.7582	1.90098	0	-3.06062	0	0	0	0	-2.46367	0	0	0	0	-1.3837	-3.08539	-3.96611	-2.97179	0	0	-3.29916	0	0	0	0	-3.42464	-2.81593	0	0	-5.82318	0	-2.31743	0
UUGUAU	GUA_d0	0.216437	0.0719728	0.360901	0.964888	0.506947	1.42283	0.427566	0.0483442	0.806788	3.1313	2.45368	3.80891	1.81542	1.66653	1.96431	1.40265	1.35202	1.45329	-2.60996	-2.81186	-1.70501	-3.54833	-3.03711	-2.36514	-3.19209	-0.303635	-3.48106	-1.17666	0	-3.41179	-4.70638	-3.14637	-4.5322	-1.09015	0	-2.46739	-2.87707	-6.38745	-0.775824	-1.21574	-1.59669	-1.31695	-1.15205	0	0	0	-3.20032	-1.21466
UUGUUA	U-rich_d2	0.953372	0.81022	1.09652	1.50676	1.08865	1.92487	1.60278	1.30307	1.90248	4.33351	3.7403	4.92671	1.04082	0.891179	1.19047	0.624736	0.574037	0.675435	0	-3.49446	-1.04603	0.284238	-0.468159	1.28958	0	-2.21259	-3.37866	1.3733	-0.471679	0.515284	-0.777973	-1.28572	-1.2264	0	-0.125525	-2.99341	-1.7938	-1.89817	-1.09766	0.431967	0.275572	0	-1.0568	1.08438	-2.04539	2.20264	0.299134	0.620428
UUGUUG	U-rich_d2	0.361044	0.301283	0.420805	0.35896	0.141041	0.576879	1.00949	0.670284	1.3487	0.293298	-0.342184	0.92878	1.32013	1.17681	1.46346	0.657736	0.583551	0.73192	2.64187	0	2.01553	5.15518	2.08209	0.615966	4.50343	2.51119	8.84452	0	6.45992	4.04024	2.36581	1.94743	0	6.22064	1.74444	5.25313	6.69086	1.51478	0	3.20071	2.05535	2.20615	9.03231	2.09264	1.50527	3.6453	3.31979	0.497853
UUGUUU	U-rich_d1	0.718762	0.665208	0.772316	1.05445	0.829836	1.27907	2.17019	2.03522	2.30515	1.61026	1.28361	1.9369	1.55575	1.41201	1.69949	0.655972	0.62055	0.691395	1.35884	-0.490006	3.18229	1.94944	0	-0.587343	0	-0.120688	-3.02527	2.34497	3.60835	-0.661384	1.0204	6.30563	0.814566	0	1.2094	1.56956	1.27953	6.11605	6.56883	4.03261	1.79088	4.20996	0.791136	6.06066	4.70691	1.10478	0	0
UUUAAA	A-rich_d3	0.370423	0.261851	0.478994	2.73145	2.30558	3.15732	0.892238	0.608221	1.17626	4.65826	4.08051	5.236	1.29633	1.14468	1.44798	0.807418	0.771375	0.843461	-5.73652	-4.36217	-3.39324	-3.9104	-0.0888253	-0.336435	-0.444489	-1.77925	-7.63915	-2.67897	0	-2.61425	-1.90103	-15.6126	-2.4712	-3.92074	-2.64921	-4.16028	-0.0746848	-1.05909	0.666212	0.30314	-3.9407	-3.26987	-0.014825	-0.498649	-4.36207	-0.421372	-1.35549	-2.87545
UUUAAU	U-rich_d2	1.04741	0.884033	1.21079	4.16477	3.91905	4.41049	0.917178	0.698829	1.13553	4.77337	4.19005	5.3567	1.19463	1.05376	1.33549	0.597575	0.547648	0.647501	-9.43042	-13.7189	-3.9238	-4.03061	-3.36689	-7.12789	-3.39188	-7.15995	-4.18819	-3.95839	0	-0.0424771	-2.39097	-7.26063	-6.1433	-4.63755	-6.49532	-4.76699	0	-7.80929	0	-0.362058	-0.581504	0	0	-3.24398	0.183581	-6.19025	-5.31968	-0.381717
UUUACA	NA	0.58528	0.482095	0.688466	1.92522	1.4945	2.35593	1.94659	1.65048	2.24271	4.59182	4.20241	4.98122	0.934273	0.645064	1.22348	0.248412	0.200435	0.296389	0	0	-0.571894	0	0	-0.0570793	-3.32087	-2.08844	-5.38031	-1.10924	-0.37854	-0.308957	-3.67254	-1.21548	-1.12904	-1.24275	-0.187018	-0.56299	0.27414	1.14057	0	0	-1.13487	-1.16638	-0.21293	0.0830967	-0.51847	0.707913	0.47682	-1.20453
UUUACU	U-rich_d2	0.734765	0.654008	0.815522	1.52702	1.10326	1.95077	1.74758	1.52624	1.96892	4.06821	3.32741	4.809	1.26837	0.992859	1.54387	0.277604	0.235557	0.31965	-0.165644	-1.05801	-1.63315	0.276005	0	1.04612	0.938685	-1.39571	-2.28282	0.475162	-0.265059	0.0899905	0.918232	-0.941372	-0.617223	0	-0.707407	-2.21015	-0.293594	0.833498	2.23759	-1.12266	1.57041	0.896804	0	0.125941	0	0.0620012	-0.415802	0.297301
UUUAGA	UAG_d0	1.18575	1.04566	1.32584	2.12237	1.63869	2.60606	0.692144	0.0891307	1.29516	4.18497	3.40835	4.96159	1.11881	0.902841	1.33479	0.648723	0.598444	0.699001	-3.0616	0	-6.31972	0	-3.23058	-1.21895	-0.901345	-0.202894	-1.13249	0	-0.69358	0.818443	0	0	-1.38169	-3.33478	0	-1.03087	-3.06042	0	-2.1974	0	-0.845969	-1.64097	0	0	-0.709406	-1.86821	-2.39348	-0.285497
UUUAGU	UAG_d0	1.29164	1.14341	1.43988	2.11678	1.70422	2.52933	0.914436	0.690816	1.13806	3.38351	2.40285	4.36416	1.33772	1.10796	1.56748	0.929604	0.856462	1.00275	-0.301552	-5.20958	-1.40319	-4.02878	-0.681889	-2.04702	0	-5.09684	-1.04264	0	0	-1.04539	0	0	-2.5837	0	-2.62086	0	-3.00719	-1.21835	-0.942477	0	-4.14268	0	-3.3725	0	-1.7062	0	0	-1.08425
UUUAUA	U-rich_d2	0.911263	0.760524	1.062	2.9711	2.592	3.35021	1.31292	1.03445	1.59138	4.27605	3.91348	4.63863	1.57547	1.30391	1.84703	0.756591	0.707473	0.80571	-7.68664	-3.82928	-6.0546	-8.71551	-2.41841	-1.50241	-2.02045	-1.25736	-5.02411	0	-2.32726	-8.83023	-6.27869	-0.750837	-8.95517	0	-3.08335	-1.64469	0	0	-0.609672	-0.59939	-0.179031	-3.28809	-3.47034	-8.00323	-4.37893	0	0	0
UUUAUC	U-rich_d2	0.383816	0.301013	0.466619	1.71112	1.24193	2.1803	2.28191	1.89535	2.66848	4.40624	3.83606	4.97642	1.0018	0.797044	1.20655	0.40716	0.355555	0.458764	0	-0.802437	-7.45188	-2.18131	0.566136	1.58561	-0.57823	-1.00715	-6.99958	1.97327	0	0.344521	-1.19757	0	-2.29549	0	-0.627748	0	0.66075	0	2.31492	-0.629928	-0.467076	0	3.42032	-0.391465	0	0.3918	0.634357	1.45082
UUUAUU	U-rich_d1	0.786826	0.709077	0.864576	2.44551	2.24265	2.64838	2.0439	1.9156	2.1722	5.34285	4.85451	5.8312	1.5527	1.39495	1.71046	0.681981	0.642831	0.72113	-2.97978	-2.38154	-4.61731	-3.20267	0.343758	-1.46208	-0.347825	-6.43712	-9.90239	-1.55004	-0.0430299	-6.21847	-3.88592	-0.692362	-9.42279	-2.49828	-2.97996	-0.79921	0.31662	0.245992	0.0550575	1.04315	-0.33769	-1.51653	-0.982018	1.19669	0.674685	0.0794115	-1.125	-1.07779
UUUCAA	NA	0.148991	0.0448062	0.253175	2.46012	2.04066	2.87958	1.62436	1.33984	1.90888	5.48495	4.92929	6.04061	1.06502	0.85604	1.274	0.401312	0.349441	0.453183	0	0	-0.537034	-0.00644385	1.86163	0	0	-4.40694	0	2.61909	0	-0.187681	0.269565	0.588637	0	-1.61786	-1.49714	0	0	-0.601813	-1.05101	0	0	1.46434	1.00265	2.91712	-0.173043	1.58698	0	2.30739
UUUCAU	U-rich_d2	0.467023	0.371777	0.562269	1.18962	0.922009	1.45724	2.0993	1.91206	2.28654	4.64507	3.86521	5.42493	1.28843	1.05756	1.5193	0.450861	0.410666	0.491057	-0.114384	-5.09087	0.553557	0.260297	-1.14453	0	-0.425799	-0.707747	-1.46847	-1.70302	1.18614	-1.85864	-1.54359	0	0.575164	0.165913	-0.698806	-1.02571	1.39174	1.72218	0.918263	1.90731	-0.102478	0.808274	3.34318	0	3.93167	1.65374	2.32703	0.989432
UUUCUC	U-rich_d2	0.40906	0.335195	0.482925	0.620543	0.225071	1.01602	2.49054	2.28378	2.69729	1.96386	1.16371	2.76401	1.14787	0.738425	1.55732	0.142597	0.0813863	0.203807	1.59209	2.75214	1.78212	1.83235	1.69994	0	0	1.78537	0	2.35212	0	3.80301	1.48836	2.4223	0.157703	3.28985	3.25284	2.04401	2.60736	4.80261	0.461727	0.783585	3.79262	1.98166	0.594958	1.82044	0	0	2.49469	0.822357
UUUCUU	U-rich_d1	0.752912	0.679704	0.826121	1.12162	0.842691	1.40055	2.42303	2.30262	2.54345	2.06295	1.3555	2.77041	1.40967	1.23038	1.58895	0.426438	0.383192	0.469684	1.22439	1.28856	2.60112	3.52882	2.70093	-0.968131	3.50946	3.36596	2.59428	5.57323	8.65119	0	2.92278	-0.415141	0.923604	1.08973	0.733404	1.43392	4.53745	1.7381	5.02972	2.78302	0	5.97746	3.90242	3.95261	8.8403	6.80065	1.01156	5.33214
UUUGAA	NA	0.128894	0.0220753	0.235713	1.49361	1.04606	1.94116	1.19364	0.948132	1.43915	3.88967	3.44854	4.3308	1.26927	1.08939	1.44916	0.503075	0.457129	0.549021	-1.86521	-0.469206	0.545857	4.92287	2.69079	5.18306	2.12102	-2.94345	1.35105	1.90422	7.17247	0.221249	0	-0.0917678	0.84517	1.72145	3.17867	1.40381	3.08757	2.62923	2.08988	6.65509	1.41373	1.00599	3.23265	3.31735	4.52941	4.63295	6.8749	0.152098
UUUGAU	U-rich_d2	0.517695	0.444214	0.591176	0.804764	0.546667	1.06286	1.55954	1.25347	1.86561	3.29777	2.4619	4.13363	1.136	0.960781	1.31123	0.475129	0.424847	0.52541	1.12536	0.134945	0.366887	2.16327	-0.651243	3.26885	2.73139	3.5495	0.883228	0	0	5.2023	1.05853	0.174528	0	0.213128	0.173772	1.85012	0.5237	0.648393	3.40129	2.03216	-1.37878	1.12888	2.86805	1.74763	3.36459	0	2.59125	1.87369
UUUGCU	U-rich_d2	0.550187	0.493366	0.607007	0.37268	0.0604197	0.68494	1.78055	1.60569	1.95541	1.13394	0.512623	1.75525	1.27611	1.01444	1.53777	0.314934	0.271514	0.358354	2.40466	4.86075	3.50746	3.20054	1.33834	2.18455	0	4.8348	6.76711	1.09899	3.25158	4.75575	0.869996	1.33624	0	1.11927	4.61222	1.79097	1.09022	0	0	1.2818	3.53884	4.38012	0.890938	1.88436	3.10774	0	1.44075	1.16479
UUUGGA	NA	0.363804	0.310494	0.417114	0.365926	-0.390315	1.12217	0.389343	-0.0177621	0.796448	3.10813	2.51725	3.69901	0.878506	0.621263	1.13575	0.119668	0.0567544	0.182581	1.90451	1.7209	0	6.66621	0	5.58043	1.87149	2.11702	0	0	2.2569	2.80547	8.66737	3.5411	1.68874	0	3.56392	8.22433	6.83646	1.47406	0.307323	5.62582	5.86643	2.28011	6.21324	3.75272	2.95653	4.37977	2.02483	4.77297
UUUGGU	U-rich_d2	0.619997	0.569911	0.670083	0.637452	0.292761	0.982143	1.11308	0.896834	1.32932	0.446669	-0.146723	1.04006	1.29251	1.04664	1.53837	0.412418	0.331611	0.493226	0	0	7.0616	5.67012	-0.972769	3.87451	2.89902	3.53581	4.17519	2.77092	-1.27183	1.99658	0.191496	-0.543815	3.36049	7.46886	-0.709779	5.05577	7.63822	4.43821	0.079515	2.31485	1.6433	0.882323	0	4.55057	14.3311	0.0719188	0	0.874721
UUUGUA	GUA_d0	0.163132	0.0449016	0.281361	0.87706	0.484153	1.26997	0.780153	0.367854	1.19245	2.87058	2.09376	3.6474	2.13296	2.00024	2.26568	1.6429	1.58909	1.69671	-3.47523	-1.08846	-4.49621	-0.00422938	-1.13358	-6.16287	0	-2.53503	-1.40724	-2.28168	0	-1.61884	-7.46407	-3.51416	-2.50614	0	0	-2.64977	-1.49079	-0.211617	-0.382446	-3.95216	-3.71149	-0.672965	0	-3.90785	0.38253	-3.07863	-0.372201	-2.15226
UUUGUU	U-rich_d1	0.874496	0.803823	0.94517	1.1779	0.982859	1.37295	2.12251	1.97092	2.27411	2.12442	1.36132	2.88752	1.76714	1.59616	1.93813	0.589201	0.551406	0.626996	-0.853819	0.723755	1.70048	0	-0.197848	-0.307213	3.48759	3.51244	3.69989	6.31377	-0.343548	1.15276	4.69917	1.02308	1.37602	2.7875	0.586074	4.16858	4.27105	5.59927	0.643991	4.61034	5.0238	3.49817	7.32846	2.50124	2.44231	4.85426	0.84051	2.84808
UUUUAA	U-rich_d2	0.736936	0.621286	0.852585	3.27633	2.92682	3.62583	1.35152	1.11201	1.59102	5.27744	4.95312	5.60176	1.54612	1.38478	1.70746	0.774397	0.735526	0.813268	-16.3909	-10.6029	0	-3.23808	-11.9792	-1.34443	-10.3722	-6.46019	-1.80877	0	-0.33121	-1.085	-11.9153	-3.92501	-6.62127	-4.02286	-5.62957	-1.51614	-2.23378	2.99454	1.34117	-2.58983	-3.61342	0.291535	-0.69394	-0.0140167	-1.7108	-1.3732	-0.667884	-2.58762
UUUUAC	U-rich_d2	0.690473	0.616368	0.764577	1.48139	1.29919	1.66358	2.41355	2.10172	2.72539	3.85589	3.389	4.32277	1.16109	0.908294	1.41389	0.284356	0.238767	0.329945	-0.806031	-4.80033	0	-0.308799	0.946724	-1.7524	-0.931073	-5.60502	-1.23183	0.514759	0.265206	1.12214	-1.30128	0	-1.21211	-1.09623	-1.92477	-0.0646237	1.13974	1.47708	1.55071	0.452039	0.103602	0.143402	-0.788531	0.637022	3.80314	-1.03322	0.168026	-0.103808
UUUUAG	UAG_d0	1.20707	1.08942	1.32472	1.39634	0.990487	1.80218	0.912243	0.360999	1.46349	4.40698	3.6001	5.21386	1.47901	1.25929	1.69874	0.808382	0.760486	0.856279	-2.21667	-0.256762	-3.51137	0	-3.14335	-0.00283887	-1.04917	-1.71817	-2.00025	-1.10001	1.38244	0	-2.44898	-6.18847	-0.790478	0	0.394614	0	0	-1.51685	0	-2.10909	-0.862362	-0.137703	-0.808179	0	0.0750604	-0.180071	0.3495	0
UUUUAU	U-rich_d1	0.680846	0.60411	0.757582	2.14278	1.92174	2.36381	2.06623	1.89155	2.24092	4.9704	4.61595	5.32485	1.63628	1.43992	1.83264	0.674367	0.638825	0.709909	-2.76556	-12.3538	-1.88863	-0.367677	1.79845	-1.68572	-3.65134	-5.00585	-1.3346	-0.337591	-6.60428	-1.80939	-1.36521	-12.3406	-1.25465	-3.85123	-3.74347	0	-0.861483	1.37895	1.94128	0.745649	-0.934334	-1.22822	-4.6184	0.458618	0.199634	0	0.266933	-2.08372
UUUUCA	U-rich_d2	0.460293	0.372439	0.548146	1.82375	1.37255	2.27494	2.59787	2.38304	2.8127	5.07301	4.52289	5.62312	1.46663	1.22234	1.71093	0.378373	0.327803	0.428942	-0.764931	0.944288	-0.68345	0.231072	0	0	-0.923754	0.157063	-0.760089	0.710452	0.404261	0	0	0.685394	1.12017	-0.701964	0.540056	-0.459376	0.608549	-1.47882	-0.102868	0	3.41446	3.67301	0.425907	1.20323	0	1.49605	2.76493	1.53906
UUUUCU	U-rich_d1	0.643986	0.579859	0.708113	1.02578	0.814389	1.23717	2.53716	2.41366	2.66067	1.62575	1.266	1.9855	1.48963	1.29751	1.68175	0.392466	0.349502	0.43543	0.874917	3.96926	1.92498	0.975172	-0.678114	1.95476	-0.25049	0.576353	1.57263	7.29898	3.69744	-0.491912	-0.537443	0.968363	-0.421903	-2.14902	-0.640657	1.38285	2.94222	2.93264	2.56182	1.3566	2.94469	3.76843	5.1958	3.09115	7.25524	1.88119	9.48614	3.14013
UUUUGA	U-rich_d2	0.471439	0.391805	0.551073	1.2041	0.866756	1.54144	1.94957	1.71841	2.18073	3.41771	2.89528	3.94013	1.38588	1.21756	1.55419	0.477505	0.432707	0.522304	-0.585869	1.62556	3.72075	1.48502	3.77235	-0.0100639	0.325619	4.26908	3.28056	5.64814	5.84364	0.479884	1.87198	0	-0.650453	5.13224	1.61884	5.86901	3.30801	3.35984	8.42689	1.55317	0	1.23797	2.02982	5.49315	0.166765	2.77493	2.57808	0.028073
UUUUGC	U-rich_d2	0.462546	0.406197	0.518894	0.0190109	-0.503538	0.54156	1.9829	1.78251	2.18328	1.11689	0.597897	1.63588	1.45058	1.16954	1.73162	0.400629	0.343564	0.457695	0	3.6668	2.28711	0.776473	2.31969	1.20433	0.041788	0	3.16364	1.5915	1.97008	0.352296	0	0.285885	1.21082	3.72971	3.74736	0.0715194	-1.4218	0	0.561532	2.7209	1.32722	4.65326	0	0	0	0	0	0
UUUUGG	U-rich_d2	0.589652	0.545186	0.634119	0.38584	-0.0230629	0.794744	1.39633	1.22811	1.56455	0.885981	0.621106	1.15086	1.21287	0.985444	1.4403	0.235254	0.167832	0.302675	0.508763	1.02626	2.68689	0.610589	7.20444	2.79106	5.69655	0.555399	1.0377	0	3.71553	1.72125	2.53995	1.62472	1.50283	0.862735	4.93245	4.49221	2.26179	3.27793	2.03414	5.17314	1.98496	2.2956	5.6799	19.8814	1.57955	0	0	2.4117
UUUUGU	U-rich_d1	0.633063	0.568232	0.697893	0.939135	0.723662	1.15461	2.16719	2.00373	2.33065	1.09106	0.81087	1.37125	2.10245	1.92891	2.27599	1.15566	1.08214	1.22917	-0.541365	-2.11239	0.492428	-0.116469	-3.71045	0.453933	0.847005	4.34754	-0.925363	0	-3.29541	-5.01666	2.15912	-0.863139	0.229556	2.76529	-1.13614	1.36549	2.49439	-1.84472	1.85272	0	1.68499	7.55638	1.11692	1.74015	5.08122	3.22191	0.237074	0.88904
UUUUUA	U-rich_d1	0.923598	0.843823	1.00337	2.37717	2.10842	2.64592	2.23358	2.05497	2.41219	4.89851	4.62832	5.16869	1.8339	1.67946	1.98833	0.698235	0.661966	0.734504	-6.64918	-2.47679	-0.323857	-0.0200282	1.84921	-1.84592	-4.67996	-4.63494	-2.95178	-0.384575	0.848398	-7.78606	-10.0851	-6.70938	-1.27351	-3.03171	0.247652	0.775234	-4.47977	-0.476854	1.01068	0.649414	0.342041	-0.673531	1.60915	1.53708	-0.793125	0.827061	-0.509513	-1.94539
UUUUUC	U-rich_d1	0.61864	0.565395	0.671884	0.974625	0.706139	1.24311	3.0428	2.89174	3.19386	2.40921	2.01147	2.80695	1.41865	1.24874	1.58856	0.416147	0.375269	0.457024	-0.21753	1.81329	0.75577	-0.297328	0.460307	2.25665	0	1.3801	3.67866	-0.0413467	0.337198	1.58367	1.89274	-1.25193	0.79318	-3.33384	-0.549105	5.91126	1.95763	-0.135442	5.2981	0.970425	1.70192	1.68158	6.58466	4.55047	3.32704	5.78065	5.16413	2.353
UUUUUG	U-rich_d1	0.623405	0.574731	0.672078	0.906226	0.705613	1.10684	1.9959	1.83925	2.15255	1.50164	1.13369	1.86959	1.88899	1.71759	2.06038	0.875295	0.799855	0.950736	2.03382	3.16289	0.801786	3.07953	-1.10239	1.25915	2.09223	1.86012	0	6.55087	2.16174	3.28841	0.606235	0.0137729	4.93195	1.65977	3.40269	-2.72679	0.329455	7.84292	5.06562	2.8771	3.7921	4.82836	9.17037	4.36731	1.33243	3.84479	1.14222	0.914181
UUUUUU	U-rich_d0	0.793448	0.747143	0.839753	1.4036	1.26615	1.54104	2.67892	2.60699	2.75085	2.18399	1.9657	2.40228	2.00515	1.8982	2.1121	0.666892	0.642663	0.69112	-2.13285	-0.602161	0.402804	-3.70621	-1.62336	-0.271813	0.304566	0.197358	7.98841	7.71691	4.26828	-3.08647	-12.0539	-1.9156	-6.2746	3.39746	-2.38091	-2.01376	-2.29454	6.07692	7.87786	9.08956	8.91125	11.8616	11.3092	3.14545	7.18735	6.61438	6.95354	4.66653
[truncated: 471 more columns]
