# Supplementary material for: Delineating yeast cleavage and polyadenylation signals using deep learning
Source: HighWire-hosted journal article supplement (doi:10.1101/gr.278606.123), 2024-06-24
Supplement: Supplemental_Table_S8.xlsx [file Supplemental_Table_S8.xlsx]

## Sheet: Legend
Table S8. The poly(A) sites identified in A. thaliana.
This table contains the locations and summary characteristics for clustered poly(A) sites identified in A. thaliana.
Descriptions of the table columns:
Chromosome	Chromosome where the poly(A) site cluster is located.
ClusterStart	The 0-based start coordinate of the poly(A) site cluster.
ClusterEnd	The 0-based end coordinate of the poly(A) site cluster, exclusive.
RepresentativeSite	The 0-based position of the representative site within the cluster, supported by the most 3'READS.
Strand	Strand, either + or -.
Gene	The assigned gene symbol where the cluster is located.
Feature	The location within the gene where the cluster is located (i.e. exon, intron, 3'UTR, etc.).
RelativePosition	If the poly(A) site cluster is located in the 3'UTR or downstream extended region, is the site the first, middle, or last site compared to other poly(A) site clusters.
Supporting 3'READS	The sum of 3'READS within the cluster boundaries.
Usage	For genes with multiple poly(A) sites, the usage level was calculated as the ratio of supporting 3'READS versus the reads supporting the top 2 3'UTR sites in the same gene.

## Sheet: PolyA sites
Chrom	ClusterStart	ClusterEnd	RepresentativeSite	Strand	Gene	Feature	RelativePosition	Supporting3'READS	Usage
1	31150	31157	31150	+	AT1G01040	utr3	first	10.5	0.0744241
1	31170	31205	31184	+	AT1G01040	utr3	last	130.583	0.925576
1	74029	74060	74045	+	AT1G01160	utr3	first	102.833	0.848227
1	74060	74079	74068	+	AT1G01160	utr3	middle	18.4	0.151773
1	74093	74107	74105	+	AT1G01160	utr3_extended	last	11.5	0.0948584
1	76673	76688	76674	+	AT1G01180	utr3	first	34.8333	0.500599
1	76706	76719	76706	+	AT1G01180	utr3	last	34.75	0.499401
1	89707	89719	89708	+	AT1G01210	utr3	first	11.0833	0.41433
1	89819	89835	89819	+	AT1G01210	intron	intron	16.3333	0.610592
1	90600	90626	90615	+	AT1G01210	utr3_extended	last	15.6667	0.58567
1	95614	95640	95617	+	AT1G01220	utr3	single	17.9619	1
1	99181	99195	99193	+	AT1G01230	utr3	first	37.3333	0.0180952
1	99195	99224	99209	+	AT1G01230	utr3	middle	1031.5	0.49996
1	99224	99242	99238	+	AT1G01230	utr3	last	1031.67	0.50004
1	101791	101805	101801	+	AT1G01240	utr3	first	38.25	0.0978887
1	101816	101853	101839	+	AT1G01240	utr3	last	352.5	0.902111
1	115521	115558	115545	+	AT1G01290	utr3	first	53.5833	0.597029
1	115558	115581	115566	+	AT1G01290	utr3	middle	36.1667	0.402971
1	116145	116163	116150	+	AT1G01290	utr3	last	10.75	0.119777
1	118588	118612	118597	+	AT1G01300	utr3	first	56	0.120365
1	118612	118640	118626	+	AT1G01300	utr3	middle	268.5	0.577109
1	118640	118666	118653	+	AT1G01300	utr3	middle	55	0.118216
1	118666	118696	118678	+	AT1G01300	utr3	middle	62.5	0.134336
1	118696	118717	118713	+	AT1G01300	utr3	middle	196.75	0.422891
1	118734	118774	118756	+	AT1G01300	utr3	last	165.952	0.356695
1	138073	138117	138098	+	AT1G01350	utr3	single	117.333	1
1	143160	143165	143160	+	AT1G01360	utr3	single	15.3333	1
1	145642	145652	145650	+	AT1G01370	utr3	single	11	1
1	186872	186880	186874	+	AT1G01500	utr3	first	35	0.153959
1	186891	186920	186893	+	AT1G01500	utr3	middle	38	0.167155
1	186920	186967	186947	+	AT1G01500	utr3	middle	189.333	0.832845
1	186967	186997	186986	+	AT1G01500	utr3	last	18.5833	0.0817449
1	190014	190020	190018	+	AT1G01510	utr3	first	12.5	0.014573
1	190031	190044	190033	+	AT1G01510	utr3	middle	261.75	0.305159
1	190055	190059	190055	+	AT1G01510	utr3	middle	27	0.0314777
1	190073	190080	190073	+	AT1G01510	utr3	middle	31	0.0361411
1	190096	190111	190102	+	AT1G01510	utr3	middle	16.5833	0.0193335
1	190111	190141	190131	+	AT1G01510	utr3	middle	71.5	0.0833576
1	190141	190162	190156	+	AT1G01510	utr3	middle	596	0.694841
1	190174	190199	190176	+	AT1G01510	utr3	last	106.3	0.123929
1	198525	198536	198531	+	AT1G01540	utr3	first	13.3333	0.0589536
1	198549	198580	198562	+	AT1G01540	utr3	middle	11.6667	0.0515844
1	198580	198610	198598	+	AT1G01540	utr3	middle	59.6667	0.263817
1	198668	198699	198683	+	AT1G01540	utr3	middle	166.5	0.736183
1	198699	198724	198703	+	AT1G01540	utr3	last	11.3333	0.0501105
1	201701	201737	201721	+	AT1G01550	utr3	first	214.583	0.0770704
1	201737	201759	201753	+	AT1G01550	utr3	last	2569.67	0.92293
1	207574	207600	207581	+	AT1G01570	utr3	single	11.5833	1
1	230767	230774	230770	+	AT1G01630	utr3	first	11.75	0.139191
1	230788	230812	230796	+	AT1G01630	utr3	middle	23.75	0.281343
1	230880	230898	230883	+	AT1G01630	utr3	last	60.6667	0.718657
1	252368	252393	252372	+	AT1G01690	utr3	single	25.6667	1
1	266188	266216	266200	+	AT1G01710	utr3	first	22	0.0679432
1	266216	266249	266232	+	AT1G01710	utr3	last	301.8	0.932057
1	267769	267792	267781	+	AT1G01715	utr3	single	171.167	1
1	269745	269770	269753	+	AT1G01720	utr3	first	40.25	0.100919
1	269770	269802	269786	+	AT1G01720	utr3	middle	71.6667	0.179691
1	269802	269837	269818	+	AT1G01720	utr3	middle	327.167	0.820309
1	269837	269880	269856	+	AT1G01720	utr3_extended	last	51.5	0.129127
1	271964	272003	271986	+	AT1G01730	utr3	first	144.167	0.651601
1	272003	272027	272006	+	AT1G01730	utr3	last	77.0833	0.348399
1	276259	276262	276259	+	AT1G01750	utr3	single	12	1
1	284193	284212	284196	+	AT1G01780	utr3	single	36.3333	1
1	291018	291055	291041	+	AT1G01790	utr3	first	170.5	0.588946
1	291055	291085	291055	+	AT1G01790	utr3	middle	75	0.259067
1	291085	291116	291100	+	AT1G01790	utr3	middle	18	0.0621762
1	291116	291140	291131	+	AT1G01790	utr3	middle	119	0.411054
1	291187	291194	291192	+	AT1G01790	utr3	last	15	0.0518135
1	294953	294985	294975	+	AT1G01800	utr3	first	26.4	0.155982
1	294996	295030	295017	+	AT1G01800	utr3	middle	36.25	0.21418
1	295082	295090	295084	+	AT1G01800	utr3	last	133	0.78582
1	319582	319592	319589	+	AT1G01920	utr3	first	32.1667	0.309047
1	319609	319623	319622	+	AT1G01920	utr3	middle	26	0.2498
1	319623	319649	319636	+	AT1G01920	utr3	middle	71.9167	0.690953
1	319649	319664	319656	+	AT1G01920	utr3	last	28.5833	0.27462
1	324852	324870	324865	+	AT1G01940	utr3	first	27.75	0.339796
1	324870	324903	324884	+	AT1G01940	utr3	last	53.9167	0.660204
1	330495	330524	330507	+	AT1G01950	utr3	single	100.333	1
1	340032	340059	340043	+	AT1G01970	utr3	first	10.5	0.0608612
1	340059	340093	340075	+	AT1G01970	utr3	last	162.024	0.939139
1	347508	347543	347529	+	AT1G02000	utr3	first	119.667	0.872418
1	347543	347558	347543	+	AT1G02000	utr3	middle	10.1667	0.0741191
1	347591	347597	347591	+	AT1G02000	utr3	last	17.5	0.127582
1	352479	352502	352479	+	AT1G02010	utr3	first	11.1667	0.462069
1	352502	352548	352525	+	AT1G02010	utr3	middle	11.8333	0.489655
1	352586	352596	352586	+	AT1G02010	utr3_extended	last	12.3333	0.510345
1	386758	386772	386770	+	AT1G02080	utr3	first	19	0.0781625
1	386772	386806	386785	+	AT1G02080	utr3	middle	107.25	0.441207
1	386835	386859	386846	+	AT1G02080	utr3	last	135.833	0.558793
1	392763	392802	392782	+	AT1G02100	utr3	first	70.3333	0.138607
1	392802	392837	392821	+	AT1G02100	utr3_extended	last	437.095	0.861393
1	392837	392858	392853	+	AT1G02110	utr5	utr5	16.1286	0.0320967
1	395468	395490	395479	+	AT1G02110	utr3	first	11.75	0.0233831
1	395516	395552	395529	+	AT1G02110	utr3_extended	middle	486.667	0.968491
1	395569	395576	395573	+	AT1G02110	utr3_extended	last	15.8333	0.0315091
1	399882	399920	399899	+	AT1G02120	utr3	first	241.5	0.645722
1	399920	399953	399940	+	AT1G02120	utr3	last	132.5	0.354278
1	408602	408629	408608	+	AT1G02145	utr3	single	42.9167	1
1	408629	408662	408650	+	AT1G02150	utr5	utr5	59	0.103479
1	410508	410522	410513	+	AT1G02150	utr3	first	51.8333	0.0909091
1	410550	410582	410579	+	AT1G02150	utr3	middle	212.5	0.372698
1	410582	410616	410597	+	AT1G02150	utr3	middle	357.667	0.627302
1	410616	410655	410618	+	AT1G02150	utr3	middle	54.8333	0.0961707
1	410655	410682	410674	+	AT1G02150	utr3	last	166.5	0.29202
1	411505	411519	411511	+	AT1G02160	utr3	first	64.5	0.275837
1	411519	411546	411532	+	AT1G02160	utr3	middle	140.333	0.600143
1	411546	411572	411552	+	AT1G02160	utr3	middle	34.4167	0.147185
1	411572	411609	411585	+	AT1G02160	utr3	middle	93.5	0.399857
1	411636	411646	411636	+	AT1G02160	utr3_extended	last	10.5	0.0449038
1	413544	413561	413546	+	AT1G02170	utr3	first	101.9	0.755374
1	413561	413586	413570	+	AT1G02170	utr3_extended	last	33	0.244626
1	422362	422372	422364	+	AT1G02205	utr3	first	203	0.929062
1	422414	422419	422414	+	AT1G02205	utr3	last	15.5	0.0709382
1	455503	455519	455516	+	AT1G02300	utr3	single	19.1667	1
1	458050	458061	458055	+	AT1G02305	utr3	first	58.8333	0.793258
1	458074	458106	458088	+	AT1G02305	utr3	middle	14.5	0.195506
1	458120	458134	458123	+	AT1G02305	utr3	last	15.3333	0.206742
1	476517	476556	476538	+	AT1G02370	utr3	single	34.1167	1
1	492982	492988	492982	+	AT1G02410	utr3_extended	single	10	1
1	520330	520362	520348	+	AT1G02500	utr3	first	11743.2	0.807414
1	520362	520399	520363	+	AT1G02500	utr3	middle	2801	0.192586
1	520399	520437	520399	+	AT1G02500	utr3	last	293.333	0.0201685
1	528893	528907	528896	+	AT1G02520	utr3	single	10.5	1
1	539893	539904	539899	+	AT1G02560	utr3	first	17.6333	0.01254
1	539964	539989	539975	+	AT1G02560	utr3	middle	1189.17	0.84568
1	539989	540018	539989	+	AT1G02560	utr3	middle	86.3333	0.0613962
1	540018	540037	540033	+	AT1G02560	utr3	middle	84.3333	0.0599739
1	540072	540097	540079	+	AT1G02560	utr3	middle	217	0.15432
1	540108	540121	540108	+	AT1G02560	utr3	last	38.5	0.0273794
1	549198	549230	549220	+	AT1G02580	utr3_extended	single	15.3	1
1	567766	567771	567768	+	AT1G02640	utr3	single	25	1
1	587209	587238	587218	+	AT1G02690	utr3	single	172	1
1	590124	590133	590129	+	AT1G02705	intron	intron	86	NA
1	594224	594238	594224	+	AT1G02720	utr3	single	14.1667	1
1	604272	604294	604284	+	AT1G02750	utr3	single	60.3333	1
1	622280	622294	622293	+	AT1G02816	utr3	first	36.4333	0.273387
1	622294	622321	622308	+	AT1G02816	utr3	middle	96.8333	0.726613
1	622321	622346	622332	+	AT1G02816	utr3	last	16.6667	0.125063
1	629715	629754	629737	+	AT1G02840	utr3	first	29.6667	0.0245585
1	629754	629773	629770	+	AT1G02840	utr3	middle	11.3333	0.0093819
1	629784	629830	629809	+	AT1G02840	utr3	middle	1178.33	0.975442
1	629830	629858	629851	+	AT1G02840	utr3	last	18.75	0.0155215
1	633169	633196	633183	+	AT1G02850	utr3	single	8911.5	1
1	637238	637263	637259	+	AT1G02860	utr3	single	28.3333	1
1	703780	703804	703795	+	AT1G03030	utr3	first	26.5	0.188836
1	703804	703835	703817	+	AT1G03030	utr3	last	113.833	0.811164
1	751900	751927	751903	+	AT1G03110	utr3	first	59.3333	0.687259
1	751927	751952	751950	+	AT1G03110	utr3	last	27	0.312741
1	758534	758571	758554	+	AT1G03150	utr3	first	22.5833	0.231426
1	758571	758600	758587	+	AT1G03150	utr3	middle	70.0833	0.71819
1	758600	758630	758611	+	AT1G03150	utr3	middle	27.5	0.28181
1	758630	758661	758646	+	AT1G03150	utr3	last	16.8333	0.172502
1	766139	766166	766152	+	AT1G03160	utr3	single	221.5	1
1	784306	784314	784310	+	AT1G03210	utr3	single	41.5	1
1	788530	788558	788545	+	AT1G03220	utr3	first	193.167	0.500108
1	788585	788614	788598	+	AT1G03220	utr3	middle	193.083	0.499892
1	788614	788638	788621	+	AT1G03220	utr3	last	29.6	0.0766343
1	791504	791537	791523	+	AT1G03230	utr3	first	62.3333	0.840449
1	791553	791596	791571	+	AT1G03230	utr3	last	11.8333	0.159551
1	806920	806963	806937	+	AT1G03280	utr3	first	150.833	0.455919
1	806963	807001	806988	+	AT1G03280	utr3	middle	125.167	0.378338
1	807001	807031	807013	+	AT1G03280	utr3	last	180	0.544081
1	810789	810837	810811	+	AT1G03290	utr3	first	608.167	0.943016
1	810837	810871	810862	+	AT1G03290	utr3	middle	25.25	0.0391523
1	810882	810893	810882	+	AT1G03290	utr3	last	36.75	0.0569841
1	816688	816721	816705	+	AT1G03310	utr3	first	28.3333	0.292599
1	816738	816750	816738	+	AT1G03310	utr3	last	68.5	0.707401
1	826283	826286	826284	+	AT1G03360	utr3	first	16.5	0.139831
1	826299	826304	826299	+	AT1G03360	utr3	middle	14.5	0.122881
1	826317	826322	826320	+	AT1G03360	utr3	middle	21	0.177966
1	826362	826368	826364	+	AT1G03360	utr3	middle	97	0.822034
1	826407	826421	826412	+	AT1G03360	utr3_extended	last	12.75	0.108051
1	830266	830272	830266	+	AT1G03365	utr3	first	13.6667	0.18427
1	830284	830304	830289	+	AT1G03365	utr3	middle	53.6667	0.723596
1	830304	830323	830319	+	AT1G03365	utr3	last	20.5	0.276404
1	835333	835369	835354	+	AT1G03370	utr3	first	34.5	0.479167
1	835369	835389	835383	+	AT1G03370	utr3	last	37.5	0.520833
1	840839	840848	840846	+	AT1G03380	utr3	first	28.5	0.0927332
1	840875	840914	840897	+	AT1G03380	utr3	middle	278.833	0.907267
1	840914	840941	840931	+	AT1G03380	utr3	middle	17.6667	0.0574837
1	840941	840964	840953	+	AT1G03380	utr3	middle	10.5	0.0341649
1	840964	840988	840978	+	AT1G03380	utr3	last	13.3333	0.0433839
1	849345	849359	849352	+	AT1G03430	utr3	first	11	0.0901639
1	849359	849371	849365	+	AT1G03430	utr3	middle	32	0.262295
1	849408	849434	849430	+	AT1G03430	utr3	middle	13.8333	0.113388
1	849481	849485	849483	+	AT1G03430	utr3	last	90	0.737705
1	854028	854036	854030	+	AT1G03440	utr3	first	19.5	0.358896
1	854061	854091	854066	+	AT1G03440	utr3	middle	34.8333	0.641104
1	854133	854147	854133	+	AT1G03440	utr3	last	14	0.257669
1	899534	899562	899547	+	AT1G03600	utr3	first	13.3333	0.0317965
1	899630	899665	899652	+	AT1G03600	utr3	middle	401	0.95628
1	899665	899685	899672	+	AT1G03600	utr3	last	18.3333	0.0437202
1	902937	902960	902955	+	AT1G03610	utr3	first	120.5	0.888206
1	902987	903005	902991	+	AT1G03610	utr3	middle	15.1667	0.111794
1	903005	903021	903005	+	AT1G03610	utr3	last	12	0.0884521
1	909322	909350	909336	+	AT1G03630	utr3	first	1681.83	0.95315
1	909350	909377	909358	+	AT1G03630	utr3	last	82.6667	0.0468499
1	920538	920558	920553	+	AT1G03687	utr3	single	56.2	1
1	937003	937024	937005	+	AT1G03740	utr3	first	12	0.0352595
1	937024	937054	937042	+	AT1G03740	utr3	last	328.333	0.96474
1	947623	947637	947628	+	AT1G03770	utr3	single	36.1	1
1	993109	993120	993111	+	AT1G03900	utr3	single	25.5	1
1	1000333	1000367	1000350	+	AT1G03910	utr3	first	20.5	0.0611636
1	1000367	1000410	1000384	+	AT1G03910	utr3	middle	143.917	0.429388
1	1000410	1000453	1000435	+	AT1G03910	utr3	last	191.25	0.570612
1	1017895	1017917	1017911	+	AT1G03960	utr3	single	28.5	1
1	1019206	1019246	1019231	+	AT1G03970	utr3	first	403.5	0.812689
1	1019246	1019266	1019246	+	AT1G03970	utr3	last	93	0.187311
1	1042877	1042880	1042877	+	AT1G04030	utr3	single	10.5	1
1	1056664	1056695	1056677	+	AT1G04080	utr3	first	2803	0.832344
1	1056695	1056734	1056712	+	AT1G04080	utr3	middle	564.6	0.167656
1	1056734	1056769	1056755	+	AT1G04080	utr3	middle	202.333	0.0600824
1	1056769	1056795	1056782	+	AT1G04080	utr3	last	246	0.0730491
1	1075503	1075516	1075503	+	AT1G04130	utr3	single	13.25	1
1	1096462	1096487	1096462	+	AT1G04160	utr3	single	10.0833	1
1	1099788	1099807	1099796	+	AT1G04170	utr3	first	37.5	0.107527
1	1099841	1099876	1099870	+	AT1G04170	utr3	middle	36	0.103226
1	1099876	1099916	1099894	+	AT1G04170	utr3	middle	269.5	0.77276
1	1099916	1099950	1099937	+	AT1G04170	utr3_extended	last	79.25	0.22724
1	1119647	1119678	1119670	+	AT1G04210	utr3	first	14	0.224599
1	1119689	1119705	1119692	+	AT1G04210	utr3	middle	25.8333	0.414439
1	1119705	1119726	1119718	+	AT1G04210	utr3	last	36.5	0.585561
1	1128064	1128074	1128070	+	AT1G04230	utr3	single	46.5	1
1	1138535	1138562	1138541	+	AT1G04250	utr3	first	43.6333	0.175846
1	1138562	1138597	1138582	+	AT1G04250	utr3	middle	204.5	0.824154
1	1138597	1138616	1138612	+	AT1G04250	utr3	last	40.75	0.164226
1	1166616	1166631	1166620	+	AT1G04350	utr3	first	84.6667	0.148821
1	1166711	1166720	1166715	+	AT1G04350	utr3	middle	20.8333	0.0366193
1	1166735	1166750	1166743	+	AT1G04350	utr3	middle	79.5	0.139739
1	1166750	1166781	1166764	+	AT1G04350	utr3	last	484.25	0.851179
1	1193851	1193874	1193864	+	AT1G04420	utr3	first	15.5	0.378049
1	1193874	1193896	1193883	+	AT1G04420	utr3	last	25.5	0.621951
1	1201433	1201451	1201437	+	AT1G04430	utr3	first	32.5	0.621019
1	1201500	1201531	1201525	+	AT1G04430	utr3	last	19.8333	0.378981
1	1205787	1205807	1205802	+	AT1G04440	utr3	first	274	0.839204
1	1205818	1205843	1205823	+	AT1G04440	utr3	middle	16.5	0.050536
1	1205843	1205875	1205863	+	AT1G04440	utr3	middle	52.5	0.160796
1	1205920	1205953	1205939	+	AT1G04440	utr3	last	12.9524	0.0396704
1	1217321	1217350	1217345	+	AT1G04480	utr3	first	57.8333	0.0930644
1	1217363	1217401	1217384	+	AT1G04480	utr3	middle	489.333	0.787427
1	1217401	1217422	1217417	+	AT1G04480	utr3	middle	107.167	0.172451
1	1217438	1217443	1217441	+	AT1G04480	utr3	middle	11.5	0.0185056
1	1217458	1217475	1217462	+	AT1G04480	utr3	middle	132.1	0.212573
1	1217475	1217499	1217487	+	AT1G04480	utr3_extended	last	14.8333	0.0238695
1	1230743	1230767	1230757	+	AT1G04510	utr3	first	31.3333	0.0295263
1	1230767	1230790	1230788	+	AT1G04510	utr3	middle	15.5	0.0146061
1	1230790	1230822	1230803	+	AT1G04510	utr3	middle	1024.65	0.965558
1	1230822	1230850	1230840	+	AT1G04510	utr3	last	36.55	0.0344421
1	1233967	1233990	1233967	+	AT1G04520	utr3	single	12	1
1	1242106	1242122	1242106	+	AT1G04550	utr3	single	28.5833	1
1	1246056	1246061	1246056	+	AT1G04560	utr3	single	19.5	1
1	1291978	1292009	1291993	+	AT1G04635	utr3	single	21.3333	1
1	1293267	1293286	1293271	+	AT1G04640	utr3	first	67.7143	0.295871
1	1293315	1293355	1293329	+	AT1G04640	utr3	middle	161.15	0.704129
1	1293355	1293400	1293380	+	AT1G04640	utr3	last	53.8833	0.235438
1	1315671	1315700	1315687	+	AT1G04690	utr3	first	282.75	0.343109
1	1315700	1315728	1315725	+	AT1G04690	utr3	middle	23.6667	0.0287188
1	1315728	1315757	1315742	+	AT1G04690	utr3	middle	541.333	0.656891
1	1315757	1315784	1315771	+	AT1G04690	utr3	middle	60	0.0728082
1	1315784	1315803	1315793	+	AT1G04690	utr3	middle	24.25	0.0294266
1	1315816	1315839	1315820	+	AT1G04690	utr3	last	21.75	0.026393
1	1324734	1324766	1324755	+	AT1G04710	utr3	first	29.6667	0.174339
1	1324766	1324787	1324779	+	AT1G04710	utr3	last	140.5	0.825661
1	1348350	1348371	1348363	+	AT1G04790	utr3	first	85.1667	0.521961
1	1348383	1348425	1348399	+	AT1G04790	utr3	middle	78	0.478039
1	1348425	1348461	1348450	+	AT1G04790	utr3	last	62.0833	0.38049
1	1355322	1355347	1355328	+	AT1G04810	utr3	first	31.5	0.0173737
1	1355347	1355381	1355365	+	AT1G04810	utr3	middle	1457	0.803603
1	1355381	1355413	1355397	+	AT1G04810	utr3	middle	356.083	0.196397
1	1355413	1355435	1355413	+	AT1G04810	utr3	last	56.9167	0.0313922
1	1387802	1387817	1387804	+	AT1G04900	utr3	first	71.5	0.488055
1	1387817	1387838	1387824	+	AT1G04900	utr3	middle	75	0.511945
1	1387893	1387914	1387894	+	AT1G04900	utr3	last	39.8333	0.2719
1	1400710	1400742	1400722	+	AT1G04940	utr3	first	157.167	0.496708
1	1400742	1400775	1400762	+	AT1G04940	utr3	middle	63.6667	0.201211
1	1400803	1400834	1400818	+	AT1G04940	utr3	last	159.25	0.503292
1	1402923	1402956	1402948	+	AT1G04945	utr3	first	21.1667	0.305656
1	1402974	1403001	1402991	+	AT1G04945	utr3	middle	48.0833	0.694344
1	1403027	1403066	1403045	+	AT1G04945	utr3	last	13.2833	0.191817
1	1413586	1413606	1413603	+	AT1G04970	utr3	first	15.5	0.241058
1	1413606	1413636	1413621	+	AT1G04970	utr3	last	48.8	0.758942
1	1428646	1428664	1428647	+	AT1G05000	utr3	first	35	0.288858
1	1428664	1428695	1428680	+	AT1G05000	utr3	middle	68	0.56121
1	1428695	1428715	1428710	+	AT1G05000	utr3	last	53.1667	0.43879
1	1484006	1484023	1484008	+	AT1G05140	utr3	single	128.5	1
1	1509084	1509106	1509084	+	AT1G05200	utr3	first	18.8333	0.410909
1	1509139	1509153	1509149	+	AT1G05200	utr3	last	27	0.589091
1	1511658	1511683	1511662	+	AT1G05210	utr3	single	33.7	1
1	1557711	1557743	1557730	+	AT1G05320	utr3	first	184.333	0.927075
1	1557743	1557759	1557745	+	AT1G05320	utr3	last	14.5	0.0729254
1	1582581	1582595	1582585	+	AT1G05380	utr3	first	24	0.0777958
1	1582595	1582633	1582608	+	AT1G05380	utr3	last	284.5	0.922204
1	1585359	1585362	1585360	+	AT1G05400	utr3	single	10	1
1	1629131	1629153	1629148	+	AT1G05500	utr3	first	10	0.0335984
1	1629165	1629201	1629178	+	AT1G05500	utr3	middle	187	0.62829
1	1629201	1629231	1629223	+	AT1G05500	utr3	last	110.633	0.37171
1	1640848	1640866	1640860	+	AT1G05540	utr3	single	20.5	1
1	1671850	1671858	1671852	+	AT1G05590	utr3	first	34.6667	0.351351
1	1671871	1671882	1671871	+	AT1G05590	utr3	last	64	0.648649
1	1687380	1687391	1687380	+	AT1G05630	utr3_extended	first	13	0.270833
1	1687423	1687432	1687423	+	AT1G05630	utr3_extended	last	35	0.729167
1	1717174	1717195	1717177	+	AT1G05710	utr3	first	25	0.352113
1	1717195	1717220	1717212	+	AT1G05710	utr3	last	46	0.647887
1	1720326	1720345	1720340	+	AT1G05730	utr3	single	13.3333	1
1	1723493	1723520	1723503	+	AT1G05750	utr3	single	10.5	1
1	1728367	1728400	1728385	+	AT1G05780	utr3	first	40	0.458891
1	1728400	1728420	1728403	+	AT1G05780	utr3	last	47.1667	0.541109
1	1732579	1732591	1732580	+	AT1G05785	utr3	first	19	0.0858434
1	1732591	1732614	1732601	+	AT1G05785	utr3	middle	177.5	0.801958
1	1732614	1732630	1732621	+	AT1G05785	utr3	last	43.8333	0.198042
1	1737466	1737485	1737468	+	AT1G05790	utr3	first	118.25	0.882463
1	1737485	1737509	1737502	+	AT1G05790	utr3	last	15.75	0.117537
1	1747629	1747651	1747631	+	AT1G05805	utr3	first	81.1667	0.387276
1	1747664	1747699	1747679	+	AT1G05805	utr3	last	128.417	0.612724
1	1749488	1749523	1749504	+	AT1G05810	utr3	first	13.3833	0.455474
1	1749535	1749544	1749535	+	AT1G05810	utr3_extended	last	16	0.544526
1	1761752	1761780	1761767	+	AT1G05830	utr3	first	20.25	0.0750695
1	1761805	1761828	1761816	+	AT1G05830	utr3	last	249.5	0.92493
1	1770639	1770672	1770656	+	AT1G05860	utr3	first	23.5	0.278656
1	1771295	1771314	1771295	+	AT1G05860	utr3_extended	last	60.8333	0.721344
1	1784456	1784474	1784470	+	AT1G05890	utr3	first	62	0.259143
1	1784474	1784505	1784492	+	AT1G05890	utr3	middle	174	0.727273
1	1784505	1784522	1784513	+	AT1G05890	utr3	last	65.25	0.272727
1	1789666	1789678	1789670	+	AT1G05900	utr3	single	54.5	1
1	1796647	1796664	1796660	+	AT1G05910	utr3	single	10	1
1	1823916	1823946	1823930	+	AT1G06010	utr3	single	48.75	1
1	1834819	1834839	1834833	+	AT1G06060	utr3	first	25.25	0.0484567
1	1834839	1834877	1834855	+	AT1G06060	utr3	last	495.833	0.951543
1	1846259	1846282	1846263	+	AT1G06080	utr3	single	45.2	1
1	1883967	1883982	1883969	+	AT1G06160	utr3	single	36.3333	1
1	1891156	1891161	1891157	+	AT1G06180	utr3	single	16.5	1
1	1899104	1899119	1899109	+	AT1G06210	utr3	first	91	0.289809
1	1899189	1899216	1899205	+	AT1G06210	utr3	last	223	0.710191
1	1904700	1904716	1904713	+	AT1G06220	utr3	first	10.75	0.0371972
1	1904716	1904746	1904732	+	AT1G06220	utr3	middle	50.8333	0.175894
1	1904746	1904763	1904759	+	AT1G06220	utr3	middle	93.5	0.323529
1	1904830	1904873	1904855	+	AT1G06220	utr3	middle	183.5	0.634948
1	1904873	1904896	1904891	+	AT1G06220	utr3	last	105.5	0.365052
1	1910792	1910799	1910794	+	AT1G06230	utr3	first	63.8	0.0384801
1	1910816	1910835	1910833	+	AT1G06230	utr3	middle	282	0.170084
1	1910835	1910868	1910849	+	AT1G06230	utr3	last	1376	0.829916
1	1913057	1913058	1913057	+	AT1G06240	utr3	first	12	0.0612245
1	1913089	1913132	1913107	+	AT1G06240	utr3	middle	38.8333	0.198129
1	1913146	1913185	1913166	+	AT1G06240	utr3	middle	157.167	0.801871
1	1913201	1913209	1913204	+	AT1G06240	utr3	middle	25.5	0.130102
1	1913260	1913265	1913263	+	AT1G06240	utr3	last	32	0.163265
1	1926138	1926147	1926139	+	AT1G06290	utr3	first	19.5	0.27957
1	1926187	1926221	1926215	+	AT1G06290	utr3	middle	28.6667	0.410992
1	1926221	1926256	1926234	+	AT1G06290	utr3	middle	41.0833	0.589008
1	1926256	1926284	1926278	+	AT1G06290	utr3_extended	last	15.8333	0.227001
1	1946038	1946061	1946047	+	AT1G06380	utr3	first	15.4167	0.0382152
1	1946061	1946088	1946075	+	AT1G06380	utr3	last	388	0.961785
1	1950705	1950729	1950716	+	AT1G06390	utr3	single	49.6667	1
1	1958626	1958666	1958650	+	AT1G06410	utr3	first	2652.83	0.984049
1	1958666	1958703	1958666	+	AT1G06410	utr3	middle	13	0.00482226
1	1958703	1958743	1958723	+	AT1G06410	utr3	last	43	0.0159505
1	1973666	1973680	1973677	+	AT1G06470	utr3	first	12.25	0.519435
1	1973892	1973913	1973899	+	AT1G06470	utr3	last	11.3333	0.480565
1	1990705	1990737	1990723	+	AT1G06500	utr3	single	26.1667	1
1	1993736	1993770	1993756	+	AT1G06510	utr3	first	94.5833	0.358383
1	1993770	1993798	1993784	+	AT1G06510	utr3	middle	167.667	0.635302
1	1993826	1993853	1993839	+	AT1G06510	utr3	last	96.25	0.364698
1	2002683	2002708	2002691	+	AT1G06530	utr3	first	697.667	0.582157
1	2002708	2002742	2002709	+	AT1G06530	utr3	last	500.75	0.417843
1	2011973	2011992	2011978	+	AT1G06560	utr3	first	66.8333	0.574499
1	2011992	2012009	2012002	+	AT1G06560	utr3	last	49.5	0.425501
1	2027208	2027246	2027227	+	AT1G06620	utr3	first	12.6667	0.493506
1	2027273	2027290	2027282	+	AT1G06620	utr3	last	13	0.506494
1	2029553	2029572	2029553	+	AT1G06630	utr3	first	10	0.073278
1	2029585	2029607	2029585	+	AT1G06630	utr3	middle	15.9167	0.116634
1	2031341	2031370	2031366	+	AT1G06630	utr3	middle	38.4667	0.281876
1	2031370	2031393	2031383	+	AT1G06630	utr3	middle	98	0.718124
1	2031393	2031415	2031402	+	AT1G06630	utr3_extended	middle	19.3333	0.141671
1	2031415	2031432	2031418	+	AT1G06630	utr3_extended	last	18.1667	0.133122
1	2033878	2033900	2033893	+	AT1G06640	utr3	first	18.5833	0.072852
1	2033900	2033936	2033918	+	AT1G06640	utr3	middle	129.333	0.507024
1	2033936	2033968	2033953	+	AT1G06640	utr3	middle	85.25	0.334205
1	2033968	2034007	2033973	+	AT1G06640	utr3	middle	22	0.0862463
1	2034007	2034034	2034030	+	AT1G06640	utr3	middle	125.75	0.492976
1	2034045	2034058	2034045	+	AT1G06640	utr3	last	41.5	0.162692
1	2035605	2035622	2035620	+	AT1G06645	utr3	first	16.5	0.5
1	2035668	2035683	2035679	+	AT1G06645	utr3	middle	11.5	0.348485
1	2035754	2035758	2035754	+	AT1G06645	utr3	middle	10.5	0.318182
1	2035814	2035816	2035814	+	AT1G06645	utr3	last	16.5	0.5
1	2037252	2037281	2037268	+	AT1G06650	utr3	first	99.9	0.506079
1	2037356	2037380	2037374	+	AT1G06650	utr3_extended	last	97.5	0.493921
1	2047507	2047542	2047538	+	AT1G06670	utr3	first	115.667	0.429721
1	2047542	2047568	2047555	+	AT1G06670	utr3	middle	153.5	0.570279
1	2047568	2047596	2047571	+	AT1G06670	utr3	middle	62	0.230341
1	2047596	2047616	2047611	+	AT1G06670	utr3	last	11.5	0.0427245
1	2049269	2049281	2049275	+	AT1G06680	utr3	first	76.1667	0.0536151
1	2049294	2049323	2049300	+	AT1G06680	utr3	middle	482.5	0.339641
1	2049323	2049362	2049346	+	AT1G06680	utr3	middle	938.119	0.660359
1	2049362	2049390	2049366	+	AT1G06680	utr3	last	132.25	0.0930932
1	2070325	2070327	2070325	+	AT1G06730	utr3	first	21.5	0.152844
1	2070369	2070393	2070381	+	AT1G06730	utr3	middle	73.3333	0.521327
1	2070445	2070457	2070445	+	AT1G06730	utr3	last	67.3333	0.478673
1	2086992	2087014	2086993	+	AT1G06780	utr3	first	22.5	0.371901
1	2087131	2087137	2087131	+	AT1G06780	utr3	last	38	0.628099
1	2089446	2089451	2089446	+	AT1G06790	utr3	first	30.5	0.439904
1	2089465	2089488	2089470	+	AT1G06790	utr3	middle	38.8333	0.560096
1	2089488	2089513	2089506	+	AT1G06790	utr3	last	15.5833	0.22476
1	2097643	2097662	2097654	+	AT1G06830	utr3	single	57.3333	1
1	2106745	2106757	2106748	+	AT1G06850	utr3	single	51.8333	1
1	2110911	2110928	2110911	+	AT1G06870	utr3	first	11.5	0.14511
1	2110928	2110950	2110944	+	AT1G06870	utr3	middle	17.9167	0.226078
1	2110961	2111001	2110975	+	AT1G06870	utr3	last	61.3333	0.773922
1	2123722	2123749	2123743	+	AT1G06910	utr3	single	16.5	1
1	2137689	2137717	2137703	+	AT1G06960	utr3	first	91.4	0.832928
1	2137717	2137750	2137725	+	AT1G06960	utr3	last	18.3333	0.167072
1	2155204	2155220	2155219	+	AT1G07010	utr3	first	67.5	0.0752872
1	2155220	2155253	2155235	+	AT1G07010	utr3	last	829.067	0.924713
1	2169802	2169818	2169815	+	AT1G07070	utr3	first	53.8	0.146621
1	2169818	2169846	2169833	+	AT1G07070	utr3	middle	313.133	0.853379
1	2169846	2169869	2169856	+	AT1G07070	utr3	last	14.75	0.040198
1	2171975	2172002	2171976	+	AT1G07080	utr3	first	104.333	0.118963
1	2172002	2172044	2172027	+	AT1G07080	utr3	middle	558.857	0.63722
1	2172044	2172073	2172047	+	AT1G07080	utr3	middle	318.167	0.36278
1	2172073	2172087	2172080	+	AT1G07080	utr3	middle	33	0.0376273
1	2172099	2172112	2172107	+	AT1G07080	utr3	middle	12.6667	0.0144428
1	2172160	2172195	2172177	+	AT1G07080	utr3	last	15.3333	0.0174834
1	2201111	2201127	2201113	+	AT1G07170	utr3	first	128.5	0.434489
1	2201127	2201159	2201140	+	AT1G07170	utr3	middle	167.25	0.565511
1	2201159	2201186	2201159	+	AT1G07170	utr3	middle	99.5	0.336433
1	2201197	2201226	2201204	+	AT1G07170	utr3	middle	11.5	0.0388842
1	2201267	2201296	2201270	+	AT1G07170	utr3	last	18.1667	0.0614258
1	2206874	2206880	2206877	+	AT1G07180	utr3	first	12.6667	0.0593518
1	2206895	2206927	2206902	+	AT1G07180	utr3	last	200.75	0.940648
1	2216847	2216854	2216851	+	AT1G07210	utr3	first	24	0.173285
1	2216885	2216910	2216902	+	AT1G07210	utr3	middle	34	0.245487
1	2216910	2216932	2216917	+	AT1G07210	utr3	middle	11.3333	0.0818291
1	2216932	2216961	2216946	+	AT1G07210	utr3	middle	100	0.722022
1	2216961	2216998	2216976	+	AT1G07210	utr3	last	38.5	0.277978
1	2225398	2225422	2225402	+	AT1G07240	utr3	first	13.0833	0.203737
1	2225422	2225456	2225441	+	AT1G07240	utr3	last	51.1333	0.796263
1	2227558	2227579	2227564	+	AT1G07250	utr3	first	128.5	0.486129
1	2227579	2227610	2227593	+	AT1G07250	utr3	middle	135.833	0.513871
1	2227610	2227635	2227610	+	AT1G07250	utr3_extended	last	27.5	0.104035
1	2241098	2241112	2241098	+	AT1G07280	utr3	first	16.5	0.0236559
1	2241112	2241146	2241126	+	AT1G07280	utr3	middle	681	0.976344
1	2241294	2241308	2241304	+	AT1G07280	utr3	last	13	0.018638
1	2250128	2250150	2250142	+	AT1G07320	utr3	first	21.2	0.0967668
1	2250150	2250178	2250165	+	AT1G07320	utr3	middle	56.5	0.257893
1	2250203	2250223	2250215	+	AT1G07320	utr3	middle	10	0.0456447
1	2250329	2250351	2250341	+	AT1G07320	utr3	middle	17.6667	0.080639
1	2250351	2250372	2250366	+	AT1G07320	utr3	middle	139.5	0.636744
1	2250409	2250432	2250421	+	AT1G07320	utr3	middle	19.9167	0.0909091
1	2250432	2250469	2250445	+	AT1G07320	utr3	last	79.5833	0.363256
1	2274789	2274803	2274802	+	AT1G07390	utr3	first	11.5833	0.163954
1	2274803	2274819	2274816	+	AT1G07390	utr3	middle	23.25	0.329087
1	2274847	2274855	2274847	+	AT1G07390	utr3	last	47.4	0.670913
1	2275749	2275782	2275765	+	AT1G07400	utr3	single	564.833	1
1	2280231	2280270	2280254	+	AT1G07420	utr3	first	221.233	0.327559
1	2280270	2280301	2280285	+	AT1G07420	utr3	last	454.167	0.672441
1	2294514	2294531	2294514	+	AT1G07470	utr3	first	11.1667	0.205774
1	2294531	2294557	2294547	+	AT1G07470	utr3	middle	29.5	0.543612
1	2294569	2294592	2294587	+	AT1G07470	utr3_extended	last	24.7667	0.456388
1	2309518	2309529	2309520	+	AT1G07510	utr3	first	23.6	0.588529
1	2309541	2309551	2309541	+	AT1G07510	utr3	last	16.5	0.411471
1	2342058	2342087	2342074	+	AT1G07610	utr3	first	200.5	0.949337
1	2342113	2342128	2342126	+	AT1G07610	utr3	last	10.7	0.0506629
1	2351560	2351568	2351562	+	AT1G07630	utr3	first	17.1667	0.304734
1	2351673	2351708	2351691	+	AT1G07630	utr3	last	39.1667	0.695266
1	2369724	2369745	2369733	+	AT1G07660	utr3	single	94.5	1
1	2381256	2381282	2381267	+	AT1G07700	utr3	first	470	0.831368
1	2381282	2381319	2381286	+	AT1G07700	utr3	middle	95.3333	0.168632
1	2381319	2381362	2381342	+	AT1G07700	utr3	middle	32.6	0.0576651
1	2381362	2381399	2381381	+	AT1G07700	utr3	last	14.9167	0.0263856
1	2385964	2385972	2385965	+	AT1G07705	utr3	first	21.6667	0.0976709
1	2385983	2386013	2385987	+	AT1G07705	utr3	middle	87.3333	0.393689
1	2386013	2386055	2386039	+	AT1G07705	utr3	middle	51.0833	0.230278
1	2386055	2386076	2386070	+	AT1G07705	utr3	last	134.5	0.606311
1	2413638	2413668	2413659	+	AT1G07790	utr3	first	72.5	0.267363
1	2413668	2413694	2413681	+	AT1G07790	utr3	middle	198.667	0.732637
1	2413694	2413717	2413707	+	AT1G07790	utr3	last	33.5	0.12354
1	2420704	2420719	2420708	+	AT1G07810	utr3	single	15.5	1
1	2423591	2423624	2423603	+	AT1G07830	utr3	first	124	0.450581
1	2423624	2423659	2423625	+	AT1G07830	utr3	middle	151.2	0.549419
1	2423687	2423709	2423700	+	AT1G07830	utr3	last	15.5833	0.0566255
1	2426563	2426576	2426574	+	AT1G07840	utr3	single	64	1
1	2439632	2439664	2439651	+	AT1G07890	utr3	first	56868.4	0.988815
1	2439664	2439694	2439664	+	AT1G07890	utr3	last	643.25	0.0111847
1	2444409	2444447	2444429	+	AT1G07902	intron	intron	36.3333	NA
1	2444447	2444469	2444465	+	AT1G07902	intron	intron	19	NA
1	2454512	2454523	2454516	+	AT1G07910	utr3	first	81.5	0.530945
1	2454536	2454578	2454559	+	AT1G07910	utr3	last	72	0.469055
1	2457244	2457275	2457257	+	AT1G07920	utr3	first	15023.7	0.912636
1	2457275	2457306	2457275	+	AT1G07920	utr3	last	1438.17	0.0873637
1	2460644	2460679	2460672	+	AT1G07930	utr3	first	773.333	0.0373787
1	2460679	2460716	2460693	+	AT1G07930	utr3	middle	19837.5	0.958835
1	2460716	2460755	2460739	+	AT1G07930	utr3	middle	851.667	0.0411649
1	2460755	2460780	2460755	+	AT1G07930	utr3	last	150.667	0.00728239
1	2468964	2468997	2468981	+	AT1G07960	utr3	first	21.1	0.250445
1	2469049	2469077	2469065	+	AT1G07960	utr3	middle	11.5	0.136499
1	2469077	2469114	2469089	+	AT1G07960	utr3	middle	21.4167	0.254204
1	2469114	2469154	2469138	+	AT1G07960	utr3	last	62.8333	0.745796
1	2482972	2482986	2482973	+	AT1G07990	utr3	first	17.6667	0.124267
1	2482986	2483000	2482988	+	AT1G07990	utr3	middle	12	0.084408
1	2483036	2483048	2483036	+	AT1G07990	utr3	middle	25.1667	0.177022
1	2483059	2483085	2483060	+	AT1G07990	utr3	middle	12.8333	0.0902696
1	2483085	2483125	2483110	+	AT1G07990	utr3	last	117	0.822978
1	2537818	2537830	2537825	+	AT1G08110	utr3	first	55.8333	0.0292704
1	2537843	2537863	2537847	+	AT1G08110	utr3	middle	275	0.144168
1	2537863	2537887	2537878	+	AT1G08110	utr3	middle	751	0.393709
1	2537900	2537934	2537924	+	AT1G08110	utr3	last	1156.5	0.606291
1	2573229	2573247	2573236	+	AT1G08190	utr3	first	21	0.0179833
1	2573332	2573368	2573348	+	AT1G08190	utr3	middle	300.5	0.257332
1	2573368	2573397	2573388	+	AT1G08190	utr3	last	867.25	0.742668
1	2609819	2609835	2609819	+	AT1G08280	utr3	single	14.3333	1
1	2637821	2637852	2637850	+	AT1G08360	utr3	first	303.25	0.120853
1	2637852	2637883	2637867	+	AT1G08360	utr3	middle	2206	0.879147
1	2637883	2637908	2637898	+	AT1G08360	utr3	last	194.583	0.0775464
1	2640496	2640530	2640526	+	AT1G08370	utr3	first	110.667	0.215654
1	2640530	2640556	2640543	+	AT1G08370	utr3	last	402.5	0.784346
1	2643235	2643251	2643244	+	AT1G08390	utr3	first	46.5	0.621381
1	2643262	2643296	2643283	+	AT1G08390	utr3	last	28.3333	0.378619
1	2649223	2649247	2649237	+	AT1G08410	utr3	first	26.25	0.168215
1	2649247	2649268	2649260	+	AT1G08410	utr3	middle	129.8	0.831785
1	2649317	2649319	2649317	+	AT1G08410	utr3	middle	18.5	0.118552
1	2649378	2649399	2649378	+	AT1G08410	utr3	last	16.1667	0.103599
1	2657045	2657066	2657062	+	AT1G08420	utr3	single	152.167	1
1	2674611	2674625	2674611	+	AT1G08460	utr3	first	25.5	0.428571
1	2674625	2674639	2674629	+	AT1G08460	utr3	last	34	0.571429
1	2685557	2685584	2685567	+	AT1G08480	utr3	first	435.333	0.642796
1	2685584	2685620	2685601	+	AT1G08480	utr3	middle	241.917	0.357204
1	2685620	2685656	2685639	+	AT1G08480	utr3	last	32.8	0.0484312
1	2700922	2700942	2700931	+	AT1G08520	utr3	single	27.1	1
1	2706766	2706792	2706779	+	AT1G08540	utr3	first	450.5	0.940992
1	2706792	2706808	2706797	+	AT1G08540	utr3	last	28.25	0.0590078
1	2709460	2709470	2709464	+	AT1G08550	utr3	single	199	1
1	2714714	2714745	2714727	+	AT1G08570	utr3	first	60.8333	0.848837
1	2714783	2714800	2714783	+	AT1G08570	utr3	last	10.8333	0.151163
1	2733624	2733631	2733628	+	AT1G08600	utr3_extended	single	82	1
1	2743691	2743710	2743698	+	AT1G08620	utr3	first	13.5	0.335404
1	2743710	2743738	2743721	+	AT1G08620	utr3	last	26.75	0.664596
1	2753586	2753592	2753586	+	AT1G08650	utr3	single	13.5	1
1	2768568	2768603	2768580	+	AT1G08680	utr3	first	41	0.618868
1	2768614	2768629	2768618	+	AT1G08680	utr3	last	25.25	0.381132
1	2773450	2773467	2773452	+	AT1G08710	utr3	first	47.9	0.502096
1	2773467	2773497	2773482	+	AT1G08710	utr3	last	47.5	0.497904
1	2779221	2779244	2779236	+	AT1G08720	utr3	first	27	0.583784
1	2779256	2779271	2779262	+	AT1G08720	utr3	last	19.25	0.416216
1	2804498	2804506	2804501	+	AT1G08750	utr3	single	11	1
1	2808534	2808557	2808534	+	AT1G08760	utr3	first	18.5	0.427746
1	2808621	2808632	2808621	+	AT1G08760	utr3	last	24.75	0.572254
1	2809716	2809730	2809720	+	AT1G08770	utr3	first	112.607	0.13384
1	2809730	2809760	2809743	+	AT1G08770	utr3	middle	728.75	0.86616
1	2809760	2809785	2809760	+	AT1G08770	utr3	last	60.6667	0.0721057
1	2829233	2829276	2829255	+	AT1G08830	utr3	single	90.2262	1
1	2840999	2841029	2841012	+	AT1G08845	utr3	single	34.25	1
1	2852156	2852191	2852178	+	AT1G08890	utr3	first	10.1667	0.226345
1	2852191	2852227	2852203	+	AT1G08890	utr3	last	34.75	0.773655
1	2860993	2861025	2861001	+	AT1G08910	utr3	first	46	0.0680138
1	2861025	2861066	2861049	+	AT1G08910	utr3	middle	630.333	0.931986
1	2861142	2861155	2861151	+	AT1G08910	utr3	last	13.25	0.0195909
1	2877072	2877106	2877086	+	AT1G08930	utr3	first	18.5833	0.277363
1	2877106	2877132	2877126	+	AT1G08930	utr3	middle	27.8333	0.415423
1	2877145	2877164	2877149	+	AT1G08930	utr3	middle	39.1667	0.584577
1	2877164	2877181	2877171	+	AT1G08930	utr3	last	16.1667	0.241294
1	2879163	2879172	2879167	+	AT1G08940	utr3	single	45.5	1
1	2882225	2882235	2882230	+	AT1G08960	utr3	single	97.5	1
1	2883957	2883992	2883974	+	AT1G08970	utr3	first	106.167	0.551515
1	2883992	2884023	2884009	+	AT1G08970	utr3	middle	84.5	0.438961
1	2884244	2884270	2884260	+	AT1G08970	utr3	last	86.3333	0.448485
1	2886481	2886509	2886483	+	AT1G08980	utr3	first	16.1667	0.0240994
1	2886523	2886532	2886523	+	AT1G08980	utr3	middle	10.0833	0.0150311
1	2886552	2886596	2886574	+	AT1G08980	utr3	middle	535	0.797516
1	2886596	2886635	2886617	+	AT1G08980	utr3	last	135.833	0.202484
1	2890905	2890920	2890906	+	AT1G08990	utr3	single	13.25	1
1	2895121	2895125	2895123	+	AT1G09000	utr3	first	13	0.245747
1	2895136	2895158	2895156	+	AT1G09000	utr3	middle	11.1667	0.21109
1	2895158	2895184	2895179	+	AT1G09000	utr3	last	39.9	0.754253
1	2915376	2915396	2915376	+	AT1G09040	utr3	single	14.25	1
1	2928773	2928807	2928782	+	AT1G09070	utr3	first	12.3333	0.0139807
1	2928831	2928848	2928836	+	AT1G09070	utr3	middle	18	0.0204043
1	2928848	2928874	2928859	+	AT1G09070	utr3	middle	10.5	0.0119025
1	2928874	2928911	2928889	+	AT1G09070	utr3	middle	655.833	0.743435
1	2928911	2928947	2928933	+	AT1G09070	utr3	middle	226.333	0.256565
1	2928947	2928970	2928947	+	AT1G09070	utr3	middle	64.5	0.0731154
1	2928970	2928999	2928979	+	AT1G09070	utr3	last	17.2333	0.0195352
1	2949060	2949069	2949066	+	AT1G09150	utr3	first	15	0.322581
1	2949123	2949152	2949136	+	AT1G09150	utr3	last	31.5	0.677419
1	2986021	2986043	2986022	+	AT1G09240	utr3	first	23.5	0.102359
1	2986043	2986082	2986064	+	AT1G09240	utr3	middle	148.75	0.647913
1	2986082	2986116	2986099	+	AT1G09240	utr3	middle	80.8333	0.352087
1	2986116	2986141	2986133	+	AT1G09240	utr3	middle	32.8333	0.143013
1	2986159	2986175	2986164	+	AT1G09240	utr3	last	30.1667	0.131397
1	2990269	2990305	2990287	+	AT1G09250	utr3	first	38.5	0.793814
1	2990305	2990325	2990311	+	AT1G09250	utr3	last	10	0.206186
1	2998070	2998088	2998072	+	AT1G09270	utr3	first	190.5	0.54145
1	2998088	2998117	2998104	+	AT1G09270	utr3	middle	161.333	0.45855
1	2998117	2998146	2998144	+	AT1G09270	utr3	middle	124	0.35244
1	2998146	2998180	2998161	+	AT1G09270	utr3	last	83.7	0.237897
1	3008223	3008262	3008237	+	AT1G09300	utr3	single	14.2833	1
1	3009802	3009835	3009822	+	AT1G09310	utr3	first	3143.83	0.96865
1	3009835	3009864	3009835	+	AT1G09310	utr3	middle	101.75	0.0313503
1	3009864	3009893	3009879	+	AT1G09310	utr3	last	89	0.0274219
1	3018093	3018132	3018114	+	AT1G09340	utr3	first	2024.25	0.66934
1	3018132	3018167	3018150	+	AT1G09340	utr3	middle	1000	0.33066
1	3018167	3018197	3018184	+	AT1G09340	utr3	middle	145.667	0.0481662
1	3018197	3018212	3018208	+	AT1G09340	utr3	middle	23.5	0.00777052
1	3018236	3018256	3018236	+	AT1G09340	utr3	middle	20.6667	0.00683365
1	3018256	3018279	3018275	+	AT1G09340	utr3	last	37.0833	0.012262
1	3033535	3033541	3033538	+	AT1G09390	utr3	single	26	1
1	3045212	3045239	3045225	+	AT1G09430	utr3	first	142.767	0.635884
1	3045239	3045257	3045241	+	AT1G09430	utr3	middle	81.75	0.364116
1	3045269	3045274	3045270	+	AT1G09430	utr3	last	20.5	0.0913073
1	3055206	3055224	3055211	+	AT1G09460	utr3	first	68.1667	0.760223
1	3055224	3055242	3055235	+	AT1G09460	utr3	middle	21.5	0.239777
1	3055277	3055292	3055280	+	AT1G09460	utr3	last	21.25	0.236989
1	3060724	3060749	3060733	+	AT1G09480	utr3	single	103	1
1	3065882	3065905	3065887	+	AT1G09490	utr3	single	295	1
1	3079430	3079468	3079460	+	AT1G09530	utr3	first	30.9667	0.319354
1	3079468	3079499	3079483	+	AT1G09530	utr3	last	66	0.680646
1	3094738	3094778	3094762	+	AT1G09560	utr3	first	782.333	0.302634
1	3094778	3094808	3094794	+	AT1G09560	utr3	middle	132.833	0.0513845
1	3094808	3094834	3094821	+	AT1G09560	utr3	last	1802.75	0.697366
1	3107680	3107726	3107701	+	AT1G09590	utr3	first	350.667	0.225075
1	3107726	3107774	3107751	+	AT1G09590	utr3	middle	1207.33	0.774925
1	3107785	3107797	3107791	+	AT1G09590	utr3	last	13.25	0.00850449
1	3122279	3122318	3122311	+	AT1G09640	utr3	first	980.833	0.267476
1	3122318	3122347	3122331	+	AT1G09640	utr3	middle	1909	0.520589
1	3122347	3122379	3122349	+	AT1G09640	utr3	middle	382.25	0.104241
1	3122390	3122410	3122397	+	AT1G09640	utr3	middle	71.8333	0.0195891
1	3122410	3122436	3122423	+	AT1G09640	utr3	middle	1758	0.479411
1	3122436	3122472	3122449	+	AT1G09640	utr3	middle	337	0.0919007
1	3122472	3122508	3122494	+	AT1G09640	utr3	middle	472	0.128716
1	3122508	3122535	3122521	+	AT1G09640	utr3	middle	355.333	0.0969003
1	3122535	3122565	3122548	+	AT1G09640	utr3_extended	last	32.3333	0.00881738
1	3124471	3124477	3124471	+	AT1G09645	utr3	first	48.6667	0.70108
1	3124568	3124591	3124574	+	AT1G09645	utr3	last	20.75	0.29892
1	3144359	3144376	3144369	+	AT1G09710	utr3	single	22.25	1
1	3156216	3156255	3156249	+	AT1G09740	utr3	first	65.1667	0.228923
1	3156255	3156287	3156274	+	AT1G09740	utr3	middle	219.5	0.771077
1	3156287	3156306	3156299	+	AT1G09740	utr3	last	11.1667	0.0392272
1	3159072	3159102	3159088	+	AT1G09750	utr3	first	26.5	0.0544521
1	3159102	3159130	3159116	+	AT1G09750	utr3	middle	382	0.784932
1	3159130	3159152	3159144	+	AT1G09750	utr3	middle	15.75	0.032363
1	3159152	3159173	3159160	+	AT1G09750	utr3_extended	middle	104.667	0.215068
1	3159173	3159192	3159183	+	AT1G09750	utr3_extended	last	28.4667	0.0584932
1	3165209	3165227	3165211	+	AT1G09770	utr3	first	15.1667	0.026816
1	3165227	3165260	3165243	+	AT1G09770	utr3	middle	288.25	0.509651
1	3165260	3165300	3165277	+	AT1G09770	utr3	middle	277.333	0.490349
1	3165300	3165343	3165322	+	AT1G09770	utr3	middle	112.417	0.198762
1	3165356	3165361	3165356	+	AT1G09770	utr3	last	32.3333	0.0571681
1	3176824	3176851	3176833	+	AT1G09795	utr3	first	84.1667	0.113939
1	3176851	3176889	3176868	+	AT1G09795	utr3	middle	648.667	0.878119
1	3176889	3176933	3176910	+	AT1G09795	utr3_extended	last	90.0333	0.121881
1	3190214	3190246	3190233	+	AT1G09815	utr3	first	769.167	0.960058
1	3190246	3190263	3190252	+	AT1G09815	utr3_extended	last	32	0.0399418
1	3204060	3204079	3204063	+	AT1G09850	utr3	single	348.333	1
1	3208584	3208607	3208590	+	AT1G09870	utr3	first	30.8333	0.492676
1	3208653	3208679	3208671	+	AT1G09870	utr3	last	31.75	0.507324
1	3247196	3247220	3247197	+	AT1G09960	utr3	single	19.55	1
1	3255590	3255617	3255594	+	AT1G09970	utr3	first	47.6667	0.0145547
1	3255617	3255663	3255639	+	AT1G09970	utr3	middle	2041.75	0.623435
1	3255663	3255701	3255686	+	AT1G09970	utr3	middle	1233.25	0.376565
1	3255701	3255740	3255715	+	AT1G09970	utr3	last	47.8	0.0145954
1	3275788	3275802	3275801	+	AT1G10030	utr3	first	11.75	0.127949
1	3275802	3275829	3275816	+	AT1G10030	utr3	middle	70.8333	0.771325
1	3275829	3275843	3275836	+	AT1G10030	utr3	middle	14.7	0.160073
1	3275873	3275891	3275884	+	AT1G10030	utr3	middle	16.25	0.176951
1	3275903	3275924	3275910	+	AT1G10030	utr3	last	21	0.228675
1	3283516	3283520	3283516	+	AT1G10050	utr3	single	14.75	1
1	3286917	3286938	3286934	+	AT1G10060	utr3	first	11.75	0.343066
1	3286958	3286966	3286958	+	AT1G10060	utr3	middle	17.75	0.518248
1	3287054	3287078	3287073	+	AT1G10060	utr3	middle	11.2	0.327007
1	3287089	3287122	3287104	+	AT1G10060	utr3	last	16.5	0.481752
1	3290263	3290303	3290286	+	AT1G10070	utr3	first	42	0.137969
1	3290370	3290410	3290392	+	AT1G10070	utr3	middle	262.417	0.862031
1	3290410	3290444	3290428	+	AT1G10070	utr3	middle	11.7	0.0384342
1	3290444	3290480	3290460	+	AT1G10070	utr3	last	17.1667	0.056392
1	3322141	3322167	3322149	+	AT1G10130	utr3	first	149.75	0.753459
1	3322167	3322200	3322185	+	AT1G10130	utr3	middle	15.65	0.0787421
1	3322200	3322224	3322215	+	AT1G10130	utr3	last	49	0.246541
1	3327572	3327587	3327586	+	AT1G10150	utr3	first	32	0.0511318
1	3327587	3327618	3327602	+	AT1G10150	utr3	middle	578	0.923569
1	3327618	3327650	3327634	+	AT1G10150	utr3_extended	last	47.8333	0.0764314
1	3354884	3354893	3354884	+	AT1G10225	utr3_extended	single	12.5	1
1	3366411	3366432	3366413	+	AT1G10270	utr3	first	459	0.944088
1	3366487	3366511	3366496	+	AT1G10270	utr3_extended	last	27.1833	0.0559117
1	3377272	3377301	3377290	+	AT1G10290	utr3	first	69.3214	0.204067
1	3377336	3377363	3377350	+	AT1G10290	utr3	middle	86.5	0.254636
1	3377396	3377413	3377412	+	AT1G10290	utr3	middle	16.5	0.0485723
1	3377413	3377451	3377430	+	AT1G10290	utr3	last	253.2	0.745364
1	3402251	3402259	3402257	+	AT1G10380	utr3	single	12.5	1
1	3438330	3438339	3438332	+	AT1G10450	utr3	single	62.3333	1
1	3460043	3460072	3460056	+	AT1G10490	utr3	single	24.125	1
1	3465703	3465726	3465706	+	AT1G10510	utr3	first	14.5	0.0737913
1	3465726	3465751	3465745	+	AT1G10510	utr3	last	182	0.926209
1	3469451	3469455	3469451	+	AT1G10520	utr3	single	12.75	1
1	3469836	3469848	3469843	+	AT1G10522	intron	intron	22	NA
1	3471399	3471432	3471418	+	AT1G10522	utr3	single	132.667	1
1	3491238	3491252	3491238	+	AT1G10570	utr3	single	24	1
1	3505531	3505549	3505547	+	AT1G10600	utr3	single	53	1
1	3508870	3508908	3508895	+	AT1G10610	utr3	first	63.75	0.858586
1	3508908	3508927	3508909	+	AT1G10610	utr3	last	10.5	0.141414
1	3531784	3531791	3531787	+	AT1G10657	utr3	single	16	1
1	3538198	3538205	3538200	+	AT1G10670	utr3	first	18	0.017192
1	3538216	3538230	3538217	+	AT1G10670	utr3	middle	32.5	0.0310411
1	3538230	3538256	3538230	+	AT1G10670	utr3	middle	16.1667	0.0154409
1	3538256	3538282	3538269	+	AT1G10670	utr3	last	1014.5	0.968959
1	3556537	3556547	3556539	+	AT1G10700	utr3	single	14.25	1
1	3564755	3564772	3564769	+	AT1G10720	utr3	first	12	0.244399
1	3564799	3564826	3564823	+	AT1G10720	utr3	last	37.1	0.755601
1	3568009	3568018	3568012	+	AT1G10730	utr3	single	13.75	1
1	3614500	3614520	3614515	+	AT1G10850	utr3	first	16.3333	0.586826
1	3614538	3614540	3614538	+	AT1G10850	utr3	last	11.5	0.413174
1	3630743	3630773	3630756	+	AT1G10890	utr3	single	128.4	1
1	3644066	3644090	3644082	+	AT1G10910	utr3	first	11.0833	0.382184
1	3644090	3644119	3644106	+	AT1G10910	utr3	middle	14.5	0.5
1	3644119	3644138	3644132	+	AT1G10910	utr3	middle	14.5	0.5
1	3644169	3644184	3644181	+	AT1G10910	utr3	last	10.6667	0.367816
1	3663821	3663837	3663826	+	AT1G10950	utr3	first	28	0.0142252
1	3663837	3663871	3663867	+	AT1G10950	utr3	middle	53	0.0269263
1	3663871	3663894	3663890	+	AT1G10950	utr3	middle	47	0.0238781
1	3663905	3663925	3663912	+	AT1G10950	utr3	middle	26.3333	0.0133785
1	3663925	3663960	3663938	+	AT1G10950	utr3	middle	32.3333	0.0164268
1	3663960	3664002	3663981	+	AT1G10950	utr3	middle	63.3333	0.0321761
1	3664013	3664019	3664013	+	AT1G10950	utr3	middle	22	0.011177
1	3664967	3665003	3664978	+	AT1G10950	utr3_extended	middle	20	0.0101609
1	3665014	3665061	3665038	+	AT1G10950	utr3_extended	middle	1905	0.967824
1	3665080	3665096	3665087	+	AT1G10950	utr3_extended	last	26.3333	0.0133785
1	3678491	3678529	3678511	+	AT1G11020	utr3	first	64.5	0.691689
1	3678529	3678554	3678547	+	AT1G11020	utr3	last	28.75	0.308311
1	3683881	3683906	3683901	+	AT1G11050	utr3	single	21.9	1
1	3689826	3689847	3689827	+	AT1G11060	utr3	single	120.5	1
1	3703694	3703738	3703717	+	AT1G11090	utr3	first	27.5	0.205224
1	3703738	3703761	3703758	+	AT1G11090	utr3	middle	19.1667	0.143035
1	3703775	3703784	3703778	+	AT1G11090	utr3	last	106.5	0.794776
1	3717591	3717594	3717592	+	AT1G11120	utr3	single	42.5	1
1	3727322	3727346	3727332	+	AT1G11130	utr3	single	14.3333	1
1	3755586	3755600	3755586	+	AT1G11200	utr3	first	34.5	0.661342
1	3755637	3755658	3755651	+	AT1G11200	utr3	last	17.6667	0.338658
1	3780220	3780232	3780222	+	AT1G11260	utr3	first	21.5	0.0168716
1	3780264	3780311	3780285	+	AT1G11260	utr3	middle	57.25	0.0449255
1	3780311	3780361	3780336	+	AT1G11260	utr3	last	1217.08	0.955075
1	3797498	3797507	3797498	+	AT1G11300	utr3	single	15.3333	1
1	3808787	3808795	3808789	+	AT1G11320	utr3	first	22.5	0.420823
1	3808820	3808825	3808820	+	AT1G11320	utr3	middle	16.8	0.314214
1	3808841	3808871	3808855	+	AT1G11320	utr3	middle	28.3	0.529302
1	3808871	3808893	3808874	+	AT1G11320	utr3	last	25.1667	0.470698
1	3813566	3813569	3813566	+	AT1G11330	utr3	single	44	1
1	3834186	3834227	3834211	+	AT1G11380	utr3	first	89	0.656827
1	3834227	3834258	3834242	+	AT1G11380	utr3	middle	33.5	0.247232
1	3834258	3834286	3834273	+	AT1G11380	utr3	last	46.5	0.343173
1	3840087	3840092	3840087	+	AT1G11400	utr3	first	12	0.0663289
1	3840143	3840162	3840148	+	AT1G11400	utr3	middle	48.8333	0.269922
1	3840162	3840190	3840175	+	AT1G11400	utr3	middle	126.417	0.698756
1	3840201	3840220	3840206	+	AT1G11400	utr3	last	54.5	0.301244
1	3849082	3849110	3849106	+	AT1G11430	utr3	first	346.25	0.156527
1	3849110	3849145	3849125	+	AT1G11430	utr3	middle	1865.83	0.843473
1	3849145	3849179	3849148	+	AT1G11430	utr3	last	44.6667	0.0201921
1	3855352	3855361	3855359	+	AT1G11450	utr3	single	16.75	1
1	3863925	3863948	3863931	+	AT1G11475	utr3	first	856	0.539099
1	3863948	3863978	3863948	+	AT1G11475	utr3	middle	731.833	0.460901
1	3863978	3864010	3863978	+	AT1G11475	utr3	middle	88.5	0.0557363
1	3864010	3864052	3864028	+	AT1G11475	utr3	last	229.233	0.144369
1	3875414	3875429	3875424	+	AT1G11530	utr3	first	18.45	0.176837
1	3875452	3875479	3875463	+	AT1G11530	utr3	middle	75.8333	0.726837
1	3875479	3875496	3875484	+	AT1G11530	utr3_extended	last	28.5	0.273163
1	3890710	3890730	3890727	+	AT1G11580	utr3	first	20	0.102477
1	3890759	3890778	3890763	+	AT1G11580	utr3	middle	169.667	0.869342
1	3890803	3890817	3890810	+	AT1G11580	utr3	last	25.5	0.130658
1	3903776	3903783	3903777	+	AT1G11600	utr3	single	28	1
1	3918025	3918053	3918040	+	AT1G11650	utr3	first	139.833	0.0161163
1	3918053	3918087	3918066	+	AT1G11650	utr3	middle	2959.67	0.341112
1	3918087	3918125	3918119	+	AT1G11650	utr3	middle	2280.67	0.262855
1	3918125	3918163	3918142	+	AT1G11650	utr3	middle	5295.67	0.610344
1	3918163	3918201	3918164	+	AT1G11650	utr3	last	3380.87	0.389656
1	3924466	3924508	3924486	+	AT1G11660	utr3	first	183.5	0.641833
1	3924526	3924532	3924527	+	AT1G11660	utr3	middle	20.3333	0.0711204
1	3924544	3924555	3924546	+	AT1G11660	utr3	last	102.4	0.358167
1	3940707	3940730	3940710	+	AT1G11680	utr3	first	213.167	0.0471712
1	3940730	3940762	3940749	+	AT1G11680	utr3	middle	4305.83	0.952829
1	3940762	3940781	3940773	+	AT1G11680	utr3	middle	74.3333	0.0164491
1	3940781	3940797	3940787	+	AT1G11680	utr3	last	58	0.0128347
1	3946600	3946619	3946612	+	AT1G11700	utr3	first	27.25	0.311429
1	3946619	3946638	3946635	+	AT1G11700	utr3	last	60.25	0.688571
1	3969646	3969668	3969655	+	AT1G11750	utr3	first	686.75	0.965554
1	3969726	3969743	3969727	+	AT1G11750	utr3	last	24.5	0.0344464
1	3985186	3985199	3985186	+	AT1G11790	utr3	first	15.6667	0.52809
1	3985210	3985219	3985214	+	AT1G11790	utr3	last	14	0.47191
1	3997723	3997735	3997723	+	AT1G11840	utr3	first	78.5	0.144279
1	3997748	3997766	3997749	+	AT1G11840	utr3	middle	254.5	0.467759
1	3997766	3997787	3997783	+	AT1G11840	utr3	middle	289.583	0.532241
1	3997798	3997814	3997798	+	AT1G11840	utr3	middle	11	0.0202175
1	3997826	3997844	3997828	+	AT1G11840	utr3	middle	80	0.147036
1	3997844	3997885	3997859	+	AT1G11840	utr3	last	41.8333	0.0768877
1	3999656	3999669	3999660	+	AT1G11850	utr3	first	104.667	0.116588
1	3999781	3999816	3999798	+	AT1G11850	utr3	middle	772.5	0.860485
1	3999816	3999848	3999833	+	AT1G11850	utr3	middle	125.25	0.139515
1	3999893	3999900	3999894	+	AT1G11850	utr3	last	12	0.0133668
1	4003307	4003315	4003308	+	AT1G11860	utr3	first	16	0.0177253
1	4003347	4003376	4003362	+	AT1G11860	utr3	middle	68	0.0753323
1	4003376	4003409	4003390	+	AT1G11860	utr3	middle	603	0.668021
1	4003409	4003445	4003428	+	AT1G11860	utr3	last	299.667	0.331979
1	4006686	4006716	4006710	+	AT1G11870	utr3	first	72.3333	0.608696
1	4006732	4006761	4006737	+	AT1G11870	utr3	last	46.5	0.391304
1	4013033	4013076	4013053	+	AT1G11890	utr3	first	202.75	0.824858
1	4013076	4013104	4013099	+	AT1G11890	utr3	middle	43.05	0.175142
1	4013116	4013129	4013121	+	AT1G11890	utr3_extended	last	26	0.105777
1	4016472	4016516	4016494	+	AT1G11905	utr3	first	470.5	0.710725
1	4016516	4016551	4016538	+	AT1G11905	utr3	middle	191.5	0.289275
1	4016551	4016576	4016553	+	AT1G11905	utr3_extended	last	33.8	0.0510574
1	4030470	4030498	4030481	+	AT1G11930	utr3	first	29.1667	0.327103
1	4030531	4030543	4030533	+	AT1G11930	utr3	middle	60	0.672897
1	4030563	4030584	4030566	+	AT1G11930	utr3	last	26	0.291589
1	4057835	4057856	4057847	+	AT1G12010	utr3	single	33.8333	1
1	4076117	4076143	4076127	+	AT1G12050	utr3	first	23.1667	0.154273
1	4076143	4076177	4076159	+	AT1G12050	utr3	last	127	0.845727
1	4077086	4077102	4077094	+	AT1G12060	utr3	first	12.6667	0.179245
1	4077102	4077123	4077116	+	AT1G12060	utr3	last	58	0.820755
1	4085017	4085057	4085041	+	AT1G12080	utr3	single	178	1
1	4095980	4095989	4095983	+	AT1G12100	utr3_extended	single	15.5	1
1	4109357	4109384	4109377	+	AT1G12110	utr3	first	52.5	0.163636
1	4109396	4109409	4109396	+	AT1G12110	utr3	middle	51.5	0.160519
1	4109409	4109425	4109421	+	AT1G12110	utr3	middle	16.25	0.0506494
1	4109447	4109484	4109465	+	AT1G12110	utr3	middle	27.35	0.0852468
1	4109517	4109551	4109537	+	AT1G12110	utr3	last	268.333	0.836364
1	4123463	4123477	4123466	+	AT1G12140	utr3	single	105	1
1	4140024	4140067	4140044	+	AT1G12200	utr3	single	30.0833	1
1	4140645	4140669	4140651	+	AT1G12210	intron	intron	78.8571	NA
1	4147796	4147820	4147817	+	AT1G12220	utr3	first	27.5	0.52381
1	4147853	4147858	4147855	+	AT1G12220	utr3	last	25	0.47619
1	4150794	4150835	4150812	+	AT1G12230	utr3	first	37	0.465409
1	4150872	4150894	4150880	+	AT1G12230	utr3	middle	36.5	0.459119
1	4150894	4150923	4150894	+	AT1G12230	utr3	middle	16.5	0.207547
1	4150961	4150969	4150963	+	AT1G12230	utr3	last	42.5	0.534591
1	4158982	4159003	4158984	+	AT1G12244	utr3	first	47	0.723077
1	4159031	4159047	4159045	+	AT1G12244	utr3	last	18	0.276923
1	4161347	4161373	4161369	+	AT1G12250	utr3	first	25	0.215517
1	4161373	4161410	4161391	+	AT1G12250	utr3	last	91	0.784483
1	4174729	4174750	4174731	+	AT1G12270	utr3_extended	first	116	0.821239
1	4174750	4174778	4174752	+	AT1G12270	utr3_extended	last	25.25	0.178761
1	4190321	4190352	4190341	+	AT1G12320	utr3	single	40.5	1
1	4196661	4196673	4196668	+	AT1G12330	utr3	first	11	0.388235
1	4196709	4196727	4196709	+	AT1G12330	utr3	last	17.3333	0.611765
1	4200739	4200755	4200742	+	AT1G12350	utr3	first	14.5	0.477759
1	4200782	4200813	4200801	+	AT1G12350	utr3	middle	15.85	0.522241
1	4200825	4200858	4200847	+	AT1G12350	utr3	last	10.5	0.345964
1	4206301	4206317	4206307	+	AT1G12360	utr3	first	23.5	0.164912
1	4206317	4206351	4206332	+	AT1G12360	utr3	middle	53.75	0.377193
1	4206351	4206386	4206369	+	AT1G12360	utr3	last	88.75	0.622807
1	4222776	4222796	4222782	+	AT1G12390	utr3_extended	single	14	1
1	4222820	4222840	4222827	+	AT1G12400	utr3	first	247.5	0.92093
1	4222840	4222867	4222851	+	AT1G12400	utr3	middle	10.1667	0.0378295
1	4222867	4222897	4222881	+	AT1G12400	utr3_extended	last	21.25	0.0790698
1	4225035	4225057	4225040	+	AT1G12410	utr3	first	225.5	0.685932
1	4225057	4225081	4225074	+	AT1G12410	utr3	middle	103.25	0.314068
1	4225106	4225127	4225113	+	AT1G12410	utr3	middle	44.4667	0.13526
1	4225127	4225156	4225137	+	AT1G12410	utr3	last	50.3333	0.153105
1	4250561	4250574	4250566	+	AT1G12460	utr3	first	25.6667	0.598756
1	4250596	4250608	4250603	+	AT1G12460	utr3	last	17.2	0.401244
1	4257316	4257344	4257329	+	AT1G12470	utr3	first	11.3333	0.025083
1	4257344	4257362	4257358	+	AT1G12470	utr3	middle	160.5	0.355219
1	4257377	4257395	4257381	+	AT1G12470	utr3	middle	291.333	0.644781
1	4257395	4257429	4257409	+	AT1G12470	utr3_extended	last	44.5	0.0984876
1	4285814	4285847	4285830	+	AT1G12580	utr3	first	210.167	0.931315
1	4285847	4285870	4285853	+	AT1G12580	utr3	last	15.5	0.0686854
1	4307844	4307848	4307844	+	AT1G12650	utr3	first	17	0.0345997
1	4307902	4307940	4307919	+	AT1G12650	utr3	middle	225	0.457938
1	4307940	4307985	4307960	+	AT1G12650	utr3	middle	266.333	0.542062
1	4307985	4308019	4307985	+	AT1G12650	utr3	last	29.4167	0.0598711
1	4337841	4337845	4337843	+	AT1G12730	utr3	single	75.5	1
1	4350651	4350668	4350654	+	AT1G12760	utr3	first	10.5	0.0897436
1	4350724	4350733	4350729	+	AT1G12760	utr3	middle	15.25	0.130342
1	4350744	4350772	4350754	+	AT1G12760	utr3	middle	85.5	0.730769
1	4350772	4350807	4350789	+	AT1G12760	utr3	last	31.5	0.269231
1	4353592	4353615	4353605	+	AT1G12770	utr3	first	74.5	0.52675
1	4353635	4353654	4353635	+	AT1G12770	utr3	middle	26.6	0.188074
1	4353654	4353686	4353673	+	AT1G12770	utr3	last	66.9333	0.47325
1	4355852	4355861	4355852	+	AT1G12775	utr3	single	16.5	1
1	4368727	4368759	4368750	+	AT1G12810	utr3	first	24.35	0.0676828
1	4368759	4368788	4368772	+	AT1G12810	utr3	middle	218.133	0.606319
1	4368788	4368826	4368803	+	AT1G12810	utr3	last	141.633	0.393681
1	4378425	4378453	4378438	+	AT1G12840	utr3	first	266.75	0.0975498
1	4378453	4378486	4378484	+	AT1G12840	utr3	middle	676	0.247212
1	4378486	4378519	4378505	+	AT1G12840	utr3	last	2058.5	0.752788
1	4386544	4386554	4386546	+	AT1G12860	utr3	first	203.167	0.906724
1	4386566	4386574	4386569	+	AT1G12860	utr3	last	20.9	0.0932758
1	4425795	4425825	4425808	+	AT1G12970	utr3	first	43	0.671875
1	4425838	4425849	4425843	+	AT1G12970	utr3	last	21	0.328125
1	4435876	4435885	4435876	+	AT1G12990	utr3	first	20.5	0.5
1	4435973	4435981	4435977	+	AT1G12990	utr3	middle	11.8333	0.288618
1	4435994	4436004	4435998	+	AT1G12990	utr3	middle	14.5	0.353659
1	4436027	4436042	4436029	+	AT1G12990	utr3	last	20.5	0.5
1	4454776	4454806	4454798	+	AT1G13060	utr3	first	321.167	0.130786
1	4454806	4454832	4454819	+	AT1G13060	utr3	middle	1923	0.783087
1	4454832	4454860	4454836	+	AT1G13060	utr3	last	532.667	0.216913
1	4463461	4463480	4463467	+	AT1G13090	utr3	single	387.4	1
1	4465592	4465630	4465610	+	AT1G13100	utr3	first	53.1667	0.84058
1	4465642	4465673	4465655	+	AT1G13100	utr3	last	10.0833	0.15942
1	4468951	4468985	4468969	+	AT1G13110	utr3	single	109.333	1
1	4488559	4488591	4488576	+	AT1G13160	utr3	single	1037.25	1
1	4498421	4498441	4498435	+	AT1G13180	utr3	single	14.5333	1
1	4499311	4499332	4499317	+	AT1G13190	intron	intron	16	0.0274914
1	4499332	4499353	4499333	+	AT1G13190	intron	intron	12.619	0.0216822
1	4501522	4501536	4501524	+	AT1G13190	utr3	first	81	0.139175
1	4501536	4501570	4501549	+	AT1G13190	utr3	middle	325.833	0.559851
1	4501608	4501619	4501612	+	AT1G13190	utr3	last	256.167	0.440149
1	4520252	4520276	4520269	+	AT1G13220	utr3	single	10.8667	1
1	4543583	4543608	4543599	+	AT1G13260	utr3	first	239.667	0.700438
1	4543686	4543714	4543703	+	AT1G13260	utr3	middle	33.5	0.0979055
1	4543714	4543747	4543727	+	AT1G13260	utr3	middle	102.5	0.299562
1	4543747	4543770	4543767	+	AT1G13260	utr3	last	24	0.0701413
1	4547185	4547220	4547200	+	AT1G13270	utr3	first	38.25	0.168874
1	4547220	4547252	4547239	+	AT1G13270	utr3	middle	95.25	0.42053
1	4547252	4547283	4547265	+	AT1G13270	utr3	middle	123	0.543046
1	4547294	4547310	4547297	+	AT1G13270	utr3	middle	103.5	0.456954
1	4547310	4547344	4547311	+	AT1G13270	utr3	middle	48	0.211921
1	4547355	4547386	4547372	+	AT1G13270	utr3	last	13.5	0.0596026
1	4548642	4548673	4548664	+	AT1G13280	utr3	first	222.667	0.669004
1	4548685	4548726	4548708	+	AT1G13280	utr3	middle	110.167	0.330996
1	4548759	4548788	4548768	+	AT1G13280	utr3	last	21.25	0.0638458
1	4558726	4558753	4558730	+	AT1G13300	utr3	first	25.3333	0.716981
1	4558753	4558776	4558775	+	AT1G13300	utr3	last	10	0.283019
1	4618255	4618263	4618261	+	AT1G13460	utr3	first	35.5	0.765794
1	4618284	4618308	4618297	+	AT1G13460	utr3	last	10.8571	0.234206
1	4648667	4648694	4648686	+	AT1G13590	utr3	first	16	0.561404
1	4648781	4648785	4648782	+	AT1G13590	utr3	last	12.5	0.438596
1	4694307	4694331	4694328	+	AT1G13690	utr3	first	56	0.089943
1	4694331	4694374	4694353	+	AT1G13690	utr3	last	566.617	0.910057
1	4712534	4712563	4712548	+	AT1G13730	utr3	first	127.667	0.818376
1	4712600	4712619	4712612	+	AT1G13730	utr3	last	28.3333	0.181624
1	4715395	4715421	4715406	+	AT1G13740	utr3	single	56.9167	1
1	4735327	4735330	4735328	+	AT1G13810	utr3	first	14	0.0905172
1	4735341	4735365	4735364	+	AT1G13810	utr3	middle	33.8333	0.21875
1	4735365	4735398	4735389	+	AT1G13810	utr3	last	120.833	0.78125
1	4737697	4737708	4737706	+	AT1G13820	utr3	first	51.5	0.526854
1	4737746	4737752	4737750	+	AT1G13820	utr3	middle	13	0.132992
1	4737827	4737851	4737835	+	AT1G13820	utr3	middle	46.25	0.473146
1	4737864	4737869	4737866	+	AT1G13820	utr3	middle	17.3333	0.177323
1	4737884	4737893	4737888	+	AT1G13820	utr3	last	11.5333	0.117988
1	4751058	4751076	4751070	+	AT1G13880	utr3	first	22.1667	0.0614887
1	4751120	4751135	4751120	+	AT1G13880	utr3	middle	13.5	0.037448
1	4751135	4751162	4751149	+	AT1G13880	utr3	middle	27.5	0.0762829
1	4751191	4751225	4751210	+	AT1G13880	utr3	middle	333	0.923717
1	4751225	4751248	4751240	+	AT1G13880	utr3_extended	last	14	0.038835
1	4761600	4761637	4761624	+	AT1G13930	utr3	first	2701.67	0.0941353
1	4761668	4761701	4761685	+	AT1G13930	utr3	middle	886.167	0.0308771
1	4761701	4761729	4761716	+	AT1G13930	utr3	last	25998.2	0.905865
1	4774786	4774824	4774808	+	AT1G13950	utr3	first	126.833	0.584037
1	4774824	4774853	4774840	+	AT1G13950	utr3	middle	30.5	0.140445
1	4774853	4774879	4774866	+	AT1G13950	utr3	last	90.3333	0.415963
1	4779263	4779299	4779278	+	AT1G13960	utr3	first	118.5	0.857453
1	4779299	4779334	4779320	+	AT1G13960	utr3	last	19.7	0.142547
1	4794514	4794521	4794514	+	AT1G13980	utr3	first	12.8333	0.368421
1	4794536	4794552	4794549	+	AT1G13980	utr3	last	22	0.631579
1	4796556	4796580	4796567	+	AT1G13990	utr3	first	15.1	0.0247406
1	4796580	4796603	4796593	+	AT1G13990	utr3	middle	593.167	0.971873
1	4796603	4796639	4796613	+	AT1G13990	utr3_extended	last	17.1667	0.0281267
1	4800165	4800187	4800171	+	AT1G14000	utr3	first	21	0.034749
1	4800187	4800228	4800194	+	AT1G14000	utr3	middle	22.5	0.0372311
1	4800228	4800266	4800252	+	AT1G14000	utr3	middle	554	0.916713
1	4800266	4800286	4800266	+	AT1G14000	utr3	last	50.3333	0.0832874
1	4824326	4824329	4824326	+	AT1G14080	utr3	first	21.5	0.641791
1	4824358	4824360	4824358	+	AT1G14080	utr3	last	12	0.358209
1	4840719	4840738	4840733	+	AT1G14150	utr3	first	32.25	0.412141
1	4840738	4840766	4840751	+	AT1G14150	utr3	last	46	0.587859
1	4871457	4871460	4871457	+	AT1G14250	utr3	single	14.3333	1
1	4879052	4879070	4879056	+	AT1G14280	utr3	first	253	0.906539
1	4879103	4879145	4879119	+	AT1G14280	utr3	last	26.0833	0.0934607
1	4889524	4889563	4889545	+	AT1G14320	utr3	first	1041.83	0.0125
1	4889563	4889598	4889580	+	AT1G14320	utr3	middle	72786.2	0.873294
1	4889598	4889638	4889616	+	AT1G14320	utr3	last	10560.6	0.126706
1	4899767	4899790	4899774	+	AT1G14345	utr3	first	164.3	0.152636
1	4899790	4899823	4899806	+	AT1G14345	utr3	middle	102.5	0.0952233
1	4899834	4899859	4899840	+	AT1G14345	utr3	middle	861	0.799876
1	4899859	4899902	4899878	+	AT1G14345	utr3	middle	83.5	0.0775722
1	4899914	4899930	4899915	+	AT1G14345	utr3	middle	181	0.16815
1	4899930	4899955	4899944	+	AT1G14345	utr3	middle	215.417	0.200124
1	4900012	4900025	4900019	+	AT1G14345	utr3	last	24.5	0.0227607
1	4911103	4911113	4911110	+	AT1G14350	utr3	first	17	0.441558
1	4911198	4911212	4911208	+	AT1G14350	utr3_extended	last	21.5	0.558442
1	4918052	4918071	4918059	+	AT1G14370	utr3	first	46.5	0.470489
1	4918071	4918107	4918084	+	AT1G14370	utr3	last	52.3333	0.529511
1	4927047	4927051	4927048	+	AT1G14390	utr3_extended	single	10.6667	1
1	4958000	4958011	4958001	+	AT1G14480	utr3	first	13.6667	0.376147
1	4958029	4958038	4958035	+	AT1G14480	utr3	last	22.6667	0.623853
1	4987311	4987331	4987313	+	AT1G14570	utr3	first	223.833	0.574668
1	4987331	4987372	4987348	+	AT1G14570	utr3	last	165.667	0.425332
1	4992599	4992613	4992606	+	AT1G14580	utr3	first	17.25	0.507353
1	4992613	4992642	4992627	+	AT1G14580	utr3	last	16.75	0.492647
1	5030639	5030655	5030642	+	AT1G14650	utr3	first	18	0.0423529
1	5030761	5030781	5030776	+	AT1G14650	utr3	middle	365	0.858824
1	5030813	5030834	5030818	+	AT1G14650	utr3	middle	60	0.141176
1	5031815	5031830	5031828	+	AT1G14650	utr3	middle	22.8333	0.0537255
1	5031850	5031877	5031863	+	AT1G14650	utr3	last	34.3333	0.0807843
1	5040474	5040511	5040494	+	AT1G14670	utr3	first	72.2	0.338649
1	5040511	5040534	5040527	+	AT1G14670	utr3	last	141	0.661351
1	5041860	5041867	5041862	+	AT1G14680	utr3	single	18.5	1
1	5044016	5044052	5044033	+	AT1G14685	utr3	first	68.25	0.108162
1	5044052	5044085	5044070	+	AT1G14685	utr3	middle	126.75	0.200872
1	5044140	5044173	5044156	+	AT1G14685	utr3	middle	141	0.223455
1	5044184	5044196	5044187	+	AT1G14685	utr3	middle	26.1667	0.0414686
1	5044196	5044212	5044205	+	AT1G14685	utr3	middle	65.1429	0.103237
1	5045310	5045314	5045312	+	AT1G14685	utr3	last	490	0.776545
1	5048670	5048675	5048670	+	AT1G14687	utr3	single	12	1
1	5074715	5074743	5074728	+	AT1G14730	utr3	first	118	0.880597
1	5074743	5074768	5074744	+	AT1G14730	utr3	last	16	0.119403
1	5093915	5093926	5093916	+	AT1G14780	utr3	first	16	0.477612
1	5093960	5093962	5093960	+	AT1G14780	utr3	last	17.5	0.522388
1	5137801	5137847	5137824	+	AT1G14890	utr3	first	30	0.104046
1	5137847	5137882	5137869	+	AT1G14890	utr3	middle	55.3333	0.191908
1	5137882	5137913	5137895	+	AT1G14890	utr3	middle	233	0.808092
1	5137932	5137949	5137934	+	AT1G14890	utr3	middle	20.5	0.0710983
1	5137949	5137966	5137949	+	AT1G14890	utr3	last	13.8333	0.0479769
1	5151139	5151180	5151159	+	AT1G14920	utr3	first	38	0.187377
1	5151236	5151242	5151240	+	AT1G14920	utr3	middle	14	0.0690335
1	5151275	5151291	5151277	+	AT1G14920	utr3	middle	164.8	0.812623
1	5151350	5151356	5151353	+	AT1G14920	utr3	last	10.8333	0.0534188
1	5169992	5170020	5170005	+	AT1G15000	utr3	first	23.3333	0.359897
1	5170042	5170079	5170065	+	AT1G15000	utr3	last	41.5	0.640103
1	5180046	5180055	5180048	+	AT1G15030	utr3	single	49.8571	1
1	5192540	5192550	5192540	+	AT1G15085	intron	intron	11	NA
1	5202049	5202075	5202052	+	AT1G15110	utr3	first	15	0.139018
1	5202075	5202102	5202098	+	AT1G15110	utr3	middle	85.4	0.791474
1	5202158	5202168	5202158	+	AT1G15110	utr3	last	22.5	0.208526
1	5204007	5204014	5204007	+	AT1G15120	utr3	first	10	0.00592066
1	5204014	5204045	5204021	+	AT1G15120	utr3	middle	56.8333	0.0336491
1	5204045	5204090	5204069	+	AT1G15120	utr3	middle	46.3333	0.0274324
1	5204090	5204134	5204111	+	AT1G15120	utr3	last	1632.17	0.966351
1	5222911	5222926	5222913	+	AT1G15170	utr3	first	28	0.6
1	5222958	5222991	5222969	+	AT1G15170	utr3	last	18.6667	0.4
1	5226643	5226651	5226643	+	AT1G15180	utr3	first	15.3333	0.152192
1	5226663	5226677	5226669	+	AT1G15180	utr3	middle	57.1667	0.567411
1	5226677	5226707	5226690	+	AT1G15180	utr3	middle	43.5833	0.432589
1	5226719	5226725	5226720	+	AT1G15180	utr3	last	13.6	0.134988
1	5240072	5240079	5240073	+	AT1G15215	utr3_extended	single	13.5	1
1	5248200	5248201	5248200	+	AT1G15240	utr3	first	15	0.035503
1	5248652	5248672	5248669	+	AT1G15240	utr3	middle	23.5	0.0556213
1	5248683	5248699	5248691	+	AT1G15240	utr3	middle	399	0.944379
1	5248729	5248737	5248734	+	AT1G15240	utr3_extended	last	15.25	0.0360947
1	5250559	5250586	5250573	+	AT1G15260	utr3_extended	first	450.833	0.908938
1	5250586	5250615	5250597	+	AT1G15260	utr3_extended	last	45.1667	0.0910618
1	5256638	5256646	5256638	+	AT1G15280	utr3	first	14	0.0622914
1	5256677	5256688	5256684	+	AT1G15280	utr3	middle	37.75	0.167964
1	5256703	5256739	5256722	+	AT1G15280	utr3	middle	187	0.832036
1	5256750	5256765	5256752	+	AT1G15280	utr3	middle	16.8333	0.074898
1	5256765	5256788	5256769	+	AT1G15280	utr3	last	13.75	0.0611791
1	5288480	5288489	5288483	+	AT1G15370	utr3	first	14.5	0.234818
1	5288501	5288511	5288509	+	AT1G15370	utr3	middle	19.5	0.315789
1	5288527	5288552	5288529	+	AT1G15370	utr3	middle	42.25	0.684211
1	5288552	5288580	5288575	+	AT1G15370	utr3	last	17.3333	0.280702
1	5292377	5292388	5292381	+	AT1G15380	utr3	first	15.5	0.0403383
1	5292399	5292417	5292404	+	AT1G15380	utr3	middle	72	0.187378
1	5292417	5292449	5292426	+	AT1G15380	utr3	middle	27.8333	0.0724355
1	5292449	5292485	5292468	+	AT1G15380	utr3	middle	308.917	0.803947
1	5292485	5292520	5292502	+	AT1G15380	utr3	middle	75.3333	0.196053
1	5292520	5292557	5292538	+	AT1G15380	utr3	last	10.1667	0.0264585
1	5295724	5295740	5295726	+	AT1G15390	utr3	first	29.75	0.296512
1	5295740	5295765	5295753	+	AT1G15390	utr3	middle	36.1667	0.360465
1	5295765	5295784	5295776	+	AT1G15390	utr3	last	64.1667	0.639535
1	5300890	5300911	5300902	+	AT1G15410	utr3	first	302.333	0.94014
1	5300923	5300927	5300923	+	AT1G15410	utr3	last	19.25	0.0598601
1	5305917	5305945	5305922	+	AT1G15430	utr3	first	43.5	0.32342
1	5305945	5305989	5305967	+	AT1G15430	utr3	middle	30.0833	0.223668
1	5306004	5306017	5306013	+	AT1G15430	utr3	last	91	0.67658
1	5320554	5320565	5320556	+	AT1G15480	utr3	first	114	0.908367
1	5320565	5320581	5320574	+	AT1G15480	utr3	last	11.5	0.0916335
1	5328774	5328799	5328793	+	AT1G15500	utr3	first	49.2667	0.0211098
1	5328799	5328825	5328812	+	AT1G15500	utr3	middle	1175	0.503464
1	5328825	5328853	5328832	+	AT1G15500	utr3	middle	12.25	0.00524888
1	5328853	5328883	5328867	+	AT1G15500	utr3	last	1158.83	0.496536
1	5365478	5365501	5365478	+	AT1G15570	utr3	single	20.1667	1
1	5385218	5385227	5385222	+	AT1G15660	utr3	first	19.6667	0.494552
1	5385253	5385256	5385253	+	AT1G15660	utr3	middle	11.3333	0.284996
1	5385346	5385361	5385356	+	AT1G15660	utr3	last	20.1	0.505448
1	5391331	5391365	5391351	+	AT1G15670	utr3	first	127.25	0.479736
1	5391365	5391406	5391378	+	AT1G15670	utr3	middle	79.3333	0.299089
1	5391406	5391446	5391433	+	AT1G15670	utr3	middle	138	0.520264
1	5391446	5391474	5391458	+	AT1G15670	utr3	middle	31.6667	0.119384
1	5391474	5391500	5391489	+	AT1G15670	utr3	last	64	0.241282
1	5402342	5402363	5402358	+	AT1G15690	utr3	first	328.5	0.0867441
1	5402411	5402441	5402426	+	AT1G15690	utr3	middle	1036.5	0.273699
1	5402441	5402471	5402442	+	AT1G15690	utr3	middle	360.25	0.0951281
1	5402471	5402500	5402486	+	AT1G15690	utr3	middle	233.333	0.0616143
1	5402500	5402536	5402513	+	AT1G15690	utr3	middle	2750.5	0.726301
1	5402536	5402575	5402558	+	AT1G15690	utr3	middle	210.25	0.0555189
1	5402575	5402595	5402577	+	AT1G15690	utr3	last	88.75	0.0234354
1	5405682	5405691	5405682	+	AT1G15710	utr3	first	11	0.0510322
1	5405736	5405751	5405740	+	AT1G15710	utr3	middle	144.25	0.669218
1	5405751	5405768	5405761	+	AT1G15710	utr3	middle	11.75	0.0545117
1	5405845	5405877	5405861	+	AT1G15710	utr3	last	71.3	0.330782
1	5407425	5407445	5407434	+	AT1G15720	utr3	single	27	1
1	5414739	5414753	5414749	+	AT1G15740	utr3	first	35	0.318955
1	5414840	5414871	5414858	+	AT1G15740	utr3	middle	74.7333	0.681045
1	5414871	5414902	5414880	+	AT1G15740	utr3	last	12.3333	0.112394
1	5426575	5426593	5426576	+	AT1G15760	utr3	first	17.3333	0.355677
1	5426593	5426623	5426610	+	AT1G15760	utr3	last	31.4	0.644323
1	5446484	5446496	5446490	+	AT1G15810	utr3	first	16.5	0.242647
1	5446513	5446517	5446515	+	AT1G15810	utr3	middle	17	0.25
1	5446539	5446570	5446548	+	AT1G15810	utr3	last	51	0.75
1	5450423	5450454	5450439	+	AT1G15830	utr3	single	60.8333	1
1	5456924	5456938	5456928	+	AT1G15860	utr3	first	29.3333	0.431373
1	5456938	5456965	5456952	+	AT1G15860	utr3	last	38.6667	0.568627
1	5458412	5458422	5458412	+	AT1G15870	utr3	single	16.5	1
1	5461195	5461215	5461212	+	AT1G15885	utr3	first	14.1667	0.469613
1	5461270	5461285	5461281	+	AT1G15885	utr3	last	16	0.530387
1	5469101	5469137	5469124	+	AT1G15910	utr3	single	153.5	1
1	5471048	5471080	5471054	+	AT1G15920	utr3	single	41.5	1
1	5472835	5472882	5472879	+	AT1G15930	utr3	first	157.833	0.0337293
1	5472882	5472917	5472904	+	AT1G15930	utr3	middle	2653.42	0.56704
1	5472917	5472947	5472917	+	AT1G15930	utr3	middle	2026	0.43296
1	5472947	5472976	5472963	+	AT1G15930	utr3	middle	714	0.152583
1	5472976	5472992	5472983	+	AT1G15930	utr3	last	58	0.0123947
1	5478166	5478183	5478180	+	AT1G15940	utr3	first	81.5	0.594891
1	5478195	5478230	5478209	+	AT1G15940	utr3	middle	43.5	0.317518
1	5478230	5478265	5478251	+	AT1G15940	utr3	middle	55.5	0.405109
1	5478265	5478287	5478269	+	AT1G15940	utr3	last	42.2	0.308029
1	5482031	5482063	5482056	+	AT1G15950	utr3	first	30.8333	0.00823448
1	5482063	5482099	5482081	+	AT1G15950	utr3	middle	55.5	0.0148221
1	5482099	5482129	5482122	+	AT1G15950	utr3	middle	595	0.158903
1	5482129	5482161	5482142	+	AT1G15950	utr3	middle	2818.33	0.752676
1	5482161	5482189	5482180	+	AT1G15950	utr3_extended	last	926.083	0.247324
1	5491227	5491263	5491250	+	AT1G15980	utr3	first	84	0.238976
1	5491263	5491298	5491276	+	AT1G15980	utr3	middle	267.5	0.761024
1	5491311	5491329	5491314	+	AT1G15980	utr3	middle	10.2	0.0290185
1	5491329	5491351	5491344	+	AT1G15980	utr3	middle	37	0.105263
1	5491362	5491377	5491362	+	AT1G15980	utr3	last	13.6667	0.038881
1	5501233	5501266	5501240	+	AT1G16020	utr3	first	258.583	0.891411
1	5501281	5501287	5501283	+	AT1G16020	utr3	last	31.5	0.108589
1	5506586	5506626	5506600	+	AT1G16040	utr3	single	266.083	1
1	5511726	5511736	5511731	+	AT1G16060	utr3	single	17.5	1
1	5515911	5515912	5515911	+	AT1G16080	utr3	first	11	0.244898
1	5515940	5515962	5515959	+	AT1G16080	utr3	middle	21.9167	0.487941
1	5515973	5515982	5515977	+	AT1G16080	utr3	last	23	0.512059
1	5517906	5517918	5517910	+	AT1G16090	utr3_extended	single	42.5	1
1	5520087	5520101	5520091	+	AT1G16110	coding_exon	CDS	11.6667	NA
1	5542767	5542777	5542767	+	AT1G16180	utr3	first	10.3333	0.0121903
1	5542814	5542847	5542833	+	AT1G16180	utr3	middle	830.167	0.979355
1	5542847	5542863	5542860	+	AT1G16180	utr3	last	17.5	0.0206449
1	5546102	5546140	5546125	+	AT1G16190	utr3_extended	single	42.75	1
1	5550720	5550737	5550735	+	AT1G16220	utr3	single	19.5	1
1	5558809	5558817	5558813	+	AT1G16250	utr3	single	21	1
1	5568361	5568389	5568367	+	AT1G16270	utr3	single	51.0833	1
1	5577619	5577623	5577621	+	AT1G16300	utr3	single	46	1
1	5580672	5580695	5580681	+	AT1G16310	utr3	first	138.5	0.66747
1	5580709	5580722	5580719	+	AT1G16310	utr3	last	69	0.33253
1	5581993	5582019	5582017	+	AT1G16320	utr3	first	67.75	0.0192399
1	5582019	5582050	5582032	+	AT1G16320	utr3	middle	74.4167	0.0211331
1	5582089	5582125	5582110	+	AT1G16320	utr3	middle	3446.92	0.978867
1	5582125	5582164	5582125	+	AT1G16320	utr3	last	17.875	0.0050762
1	5592978	5592992	5592984	+	AT1G16350	utr3	first	187.833	0.238266
1	5592992	5593028	5593006	+	AT1G16350	utr3	middle	306.167	0.388372
1	5593028	5593054	5593049	+	AT1G16350	utr3	middle	482.167	0.611628
1	5593069	5593106	5593093	+	AT1G16350	utr3	last	96.4667	0.122368
1	5598428	5598438	5598432	+	AT1G16370	utr3	single	25.3333	1
1	5604567	5604585	5604570	+	AT1G16390	utr3	first	24	0.545455
1	5604585	5604603	5604600	+	AT1G16390	utr3	last	20	0.454545
1	5607412	5607414	5607412	+	AT1G16400	utr3	first	13.5	0.20403
1	5607452	5607493	5607468	+	AT1G16400	utr3	last	52.6667	0.79597
1	5611271	5611278	5611273	+	AT1G16410	utr3	first	30	0.358566
1	5611317	5611330	5611329	+	AT1G16410	utr3	middle	28.5	0.340637
1	5611330	5611347	5611343	+	AT1G16410	utr3	last	53.6667	0.641434
1	5625548	5625556	5625551	+	AT1G16470	utr3	first	29	0.0274232
1	5625576	5625626	5625601	+	AT1G16470	utr3	middle	1028.25	0.97234
1	5625626	5625658	5625651	+	AT1G16470	utr3	last	29.25	0.0276596
1	5640172	5640187	5640176	+	AT1G16500	utr3	single	18.1667	1
1	5651108	5651118	5651109	+	AT1G16520	utr3	first	18.75	0.420561
1	5651144	5651170	5651145	+	AT1G16520	utr3	middle	25.8333	0.579439
1	5651181	5651216	5651194	+	AT1G16520	utr3_extended	last	12.3333	0.276636
1	5665458	5665487	5665471	+	AT1G16540	utr3	single	34.25	1
1	5670547	5670582	5670556	+	AT1G16560	utr3	first	192.333	0.313332
1	5670594	5670612	5670597	+	AT1G16560	utr3	middle	421.5	0.686668
1	5670612	5670646	5670613	+	AT1G16560	utr3	middle	65	0.105892
1	5670646	5670679	5670666	+	AT1G16560	utr3	last	44.8333	0.0730383
1	5675123	5675140	5675128	+	AT1G16590	utr3	single	26.4167	1
1	5691233	5691242	5691238	+	AT1G16650	utr3	first	12	0.467532
1	5691256	5691259	5691256	+	AT1G16650	utr3	middle	13.6667	0.532468
1	5691307	5691311	5691309	+	AT1G16650	utr3	last	11.5	0.448052
1	5699763	5699782	5699768	+	AT1G16670	utr3	single	18.0833	1
1	5705861	5705884	5705863	+	AT1G16680	utr3	single	12.7333	1
1	5709494	5709517	5709504	+	AT1G16690	utr3	first	94.5	0.725064
1	5709517	5709537	5709529	+	AT1G16690	utr3	middle	35.8333	0.274936
1	5709576	5709582	5709576	+	AT1G16690	utr3_extended	last	15.5	0.118926
1	5711840	5711854	5711845	+	AT1G16700	utr3	first	10	0.011217
1	5711885	5711914	5711901	+	AT1G16700	utr3	last	881.5	0.988783
1	5722316	5722340	5722324	+	AT1G16710	utr3	first	16.3333	0.107397
1	5722340	5722377	5722356	+	AT1G16710	utr3	middle	100.667	0.661918
1	5722425	5722458	5722433	+	AT1G16710	utr3	last	51.4167	0.338082
1	5726351	5726392	5726366	+	AT1G16720	utr3	first	641.833	0.477655
1	5726392	5726431	5726417	+	AT1G16720	utr3	middle	701.883	0.522345
1	5726474	5726486	5726477	+	AT1G16720	utr3	last	34	0.025303
1	5729064	5729096	5729078	+	AT1G16740	utr3	single	658	1
1	5745150	5745186	5745166	+	AT1G16790	utr3	first	25.1667	0.68018
1	5745186	5745226	5745206	+	AT1G16790	utr3	last	11.8333	0.31982
1	5756821	5756852	5756837	+	AT1G16810	utr3	first	1821	0.705427
1	5756852	5756881	5756852	+	AT1G16810	utr3	last	760.417	0.294573
1	5770415	5770425	5770418	+	AT1G16860	utr3	first	10.5	0.0130646
1	5770491	5770512	5770497	+	AT1G16860	utr3	middle	37.8333	0.0470739
1	5770512	5770545	5770527	+	AT1G16860	utr3	middle	428.95	0.533719
1	5770545	5770584	5770563	+	AT1G16860	utr3	middle	82.1667	0.102235
1	5770584	5770627	5770604	+	AT1G16860	utr3_extended	middle	374.75	0.466281
1	5770639	5770656	5770639	+	AT1G16860	utr3_extended	last	42.6667	0.0530878
1	5776255	5776294	5776278	+	AT1G16880	utr3	single	73.0333	1
1	5800767	5800808	5800787	+	AT1G16960	utr3	single	31.5333	1
1	5828246	5828255	5828248	+	AT1G17040	utr3	single	11.9167	1
1	5831279	5831300	5831298	+	AT1G17050	utr3	first	45.5	0.341506
1	5831320	5831347	5831333	+	AT1G17050	utr3	last	87.7333	0.658494
1	5840263	5840282	5840263	+	AT1G17070	utr3	first	26.75	0.445215
1	5840329	5840355	5840331	+	AT1G17070	utr3	last	33.3333	0.554785
1	5845592	5845606	5845595	+	AT1G17100	utr3	first	73	0.79927
1	5845606	5845620	5845616	+	AT1G17100	utr3	middle	18	0.19708
1	5845631	5845662	5845649	+	AT1G17100	utr3	last	18.3333	0.20073
1	5853855	5853873	5853862	+	AT1G17120	utr3	first	14.5	0.216203
1	5853894	5853906	5853903	+	AT1G17120	utr3	middle	10.3333	0.154076
1	5853937	5853968	5853950	+	AT1G17120	utr3	last	52.5667	0.783797
1	5856569	5856591	5856578	+	AT1G17130	utr3	first	12.0833	0.163105
1	5856591	5856627	5856604	+	AT1G17130	utr3	middle	39.75	0.536558
1	5856627	5856670	5856650	+	AT1G17130	utr3	last	34.3333	0.463442
1	5869259	5869273	5869264	+	AT1G17160	utr3	single	192.5	1
1	5870766	5870805	5870780	+	AT1G17170	utr3	first	171	0.196364
1	5870833	5870853	5870840	+	AT1G17170	utr3	middle	699.833	0.803636
1	5870853	5870880	5870861	+	AT1G17170	utr3	last	56.3333	0.064689
1	5873071	5873089	5873084	+	AT1G17180	utr3	single	49.7	1
1	5876483	5876521	5876507	+	AT1G17190	utr3	single	20.3333	1
1	5879934	5879959	5879956	+	AT1G17200	utr3	first	11.0833	0.00980971
1	5879959	5879992	5879975	+	AT1G17200	utr3	middle	1045.5	0.925358
1	5879992	5880024	5879993	+	AT1G17200	utr3	last	84.3333	0.0746423
1	5890435	5890449	5890435	+	AT1G17220	utr3	single	30.4167	1
1	5926289	5926329	5926303	+	AT1G17290	utr3	first	26.4667	0.112993
1	5926340	5926360	5926359	+	AT1G17290	utr3	middle	47.25	0.201722
1	5926360	5926397	5926373	+	AT1G17290	utr3	last	186.983	0.798278
1	5938678	5938693	5938686	+	AT1G17340	utr3	first	33	0.72
1	5938749	5938759	5938756	+	AT1G17340	utr3	last	12.8333	0.28
1	5951534	5951553	5951543	+	AT1G17360	utr3	single	81	1
1	5981477	5981493	5981477	+	AT1G17420	utr3	single	15.35	1
1	5983969	5983981	5983973	+	AT1G17430	utr3	single	33.1667	1
1	5998456	5998477	5998473	+	AT1G17455	utr3	single	62	1
1	6002682	6002700	6002684	+	AT1G17460	utr3	first	75	0.615174
1	6002700	6002732	6002715	+	AT1G17460	utr3	last	46.9167	0.384826
1	6006324	6006351	6006332	+	AT1G17470	utr3	first	397.833	0.21883
1	6006351	6006386	6006369	+	AT1G17470	utr3	middle	1420.17	0.78117
1	6006386	6006429	6006391	+	AT1G17470	utr3	last	17.5	0.00962596
1	6009270	6009287	6009273	+	AT1G17490	utr3	single	93.5	1
1	6023519	6023543	6023538	+	AT1G17500	utr3_extended	single	57	1
1	6028444	6028465	6028451	+	AT1G17530	utr3	first	32.6667	0.397566
1	6028476	6028493	6028476	+	AT1G17530	utr3	middle	49.5	0.602434
1	6028493	6028532	6028498	+	AT1G17530	utr3	middle	18.25	0.22211
1	6028571	6028608	6028586	+	AT1G17530	utr3	last	25	0.30426
1	6037206	6037241	6037228	+	AT1G17550	utr3	first	43.0833	0.357291
1	6037267	6037291	6037280	+	AT1G17550	utr3	last	77.5	0.642709
1	6049509	6049520	6049509	+	AT1G17580	utr3	first	11	0.0463158
1	6049533	6049571	6049555	+	AT1G17580	utr3	middle	215	0.905263
1	6049571	6049591	6049586	+	AT1G17580	utr3	last	22.5	0.0947368
1	6063267	6063291	6063287	+	AT1G17620	utr3	single	36.25	1
1	6082249	6082259	6082254	+	AT1G17680	utr3	first	21.5	0.347241
1	6082321	6082353	6082333	+	AT1G17680	utr3	last	40.4167	0.652759
1	6100302	6100318	6100305	+	AT1G17730	utr3	first	149.083	0.630818
1	6100318	6100354	6100321	+	AT1G17730	utr3	last	87.25	0.369182
1	6105153	6105184	6105176	+	AT1G17745	utr3	first	330.067	0.459703
1	6105184	6105205	6105204	+	AT1G17745	utr3	middle	41.3333	0.0575673
1	6105205	6105241	6105218	+	AT1G17745	utr3	middle	387.933	0.540297
1	6105241	6105267	6105264	+	AT1G17745	utr3	last	86.3333	0.120241
1	6125226	6125249	6125230	+	AT1G17780	utr3	first	11.9167	0.0256871
1	6125249	6125275	6125268	+	AT1G17780	utr3	last	452	0.974313
1	6146113	6146120	6146113	+	AT1G17840	utr3	first	23	0.03
1	6146148	6146172	6146161	+	AT1G17840	utr3	middle	31.3333	0.0408696
1	6146210	6146228	6146214	+	AT1G17840	utr3	last	735.333	0.95913
1	6150014	6150029	6150015	+	AT1G17860	utr3	single	30.1667	1
1	6187380	6187397	6187394	+	AT1G17970	utr3	first	10	0.408163
1	6187410	6187417	6187410	+	AT1G17970	utr3	last	14.5	0.591837
1	6206790	6206818	6206803	+	AT1G18030	utr3	single	67.1667	1
1	6223975	6224013	6224005	+	AT1G18080	utr3	first	337.833	0.0897498
1	6224013	6224039	6224026	+	AT1G18080	utr3	middle	1679.17	0.446093
1	6224039	6224076	6224046	+	AT1G18080	utr3	middle	2085	0.553907
1	6224076	6224117	6224076	+	AT1G18080	utr3	middle	187.583	0.049834
1	6224117	6224155	6224134	+	AT1G18080	utr3	middle	574.417	0.152601
1	6224186	6224211	6224204	+	AT1G18080	utr3	middle	76.0833	0.0202125
1	6224222	6224229	6224226	+	AT1G18080	utr3	last	86.6667	0.0230241
1	6255587	6255611	6255598	+	AT1G18170	utr3	first	22	0.196166
1	6255625	6255642	6255639	+	AT1G18170	utr3	middle	12.4	0.110566
1	6255642	6255674	6255658	+	AT1G18170	utr3	middle	84.65	0.754793
1	6255674	6255699	6255676	+	AT1G18170	utr3	middle	17.75	0.15827
1	6255699	6255717	6255708	+	AT1G18170	utr3	last	27.5	0.245207
1	6330045	6330060	6330051	+	AT1G18390	utr3	first	47.8333	0.326879
1	6330060	6330084	6330073	+	AT1G18390	utr3	last	98.5	0.673121
1	6333729	6333748	6333732	+	AT1G18400	utr3	first	77.0833	0.701821
1	6333748	6333773	6333764	+	AT1G18400	utr3	last	32.75	0.298179
1	6347767	6347779	6347769	+	AT1G18440	utr3	single	123	1
1	6351903	6351941	6351925	+	AT1G18450	utr3	first	26	0.101894
1	6351941	6351971	6351957	+	AT1G18450	utr3	middle	226.5	0.887655
1	6351971	6351986	6351972	+	AT1G18450	utr3	last	28.6667	0.112345
1	6356072	6356094	6356079	+	AT1G18460	utr3	first	164.5	0.769291
1	6356094	6356115	6356109	+	AT1G18460	utr3	last	49.3333	0.230709
1	6362995	6363025	6363006	+	AT1G18480	utr3	single	909.833	1
1	6366207	6366220	6366207	+	AT1G18485	utr3	first	30.5	0.614094
1	6366220	6366242	6366221	+	AT1G18485	utr3	last	19.1667	0.385906
1	6368730	6368756	6368749	+	AT1G18490	utr3	single	43.25	1
1	6372983	6373005	6373003	+	AT1G18500	utr3	first	64.5	0.0822442
1	6373005	6373040	6373025	+	AT1G18500	utr3	middle	593.667	0.756987
1	6373040	6373069	6373040	+	AT1G18500	utr3	middle	120.083	0.153119
1	6373069	6373105	6373083	+	AT1G18500	utr3_extended	last	190.583	0.243013
1	6391250	6391273	6391266	+	AT1G18570	utr3	first	22.5	0.370879
1	6391273	6391301	6391286	+	AT1G18570	utr3	middle	38.1667	0.629121
1	6391301	6391316	6391304	+	AT1G18570	utr3	last	10.3333	0.17033
1	6398202	6398219	6398204	+	AT1G18580	utr3	single	111.667	1
1	6399813	6399816	6399813	+	AT1G18590	utr3	first	33	0.0878828
1	6399829	6399858	6399854	+	AT1G18590	utr3	middle	48.5	0.129161
1	6399858	6399896	6399876	+	AT1G18590	utr3	last	327	0.870839
1	6402719	6402721	6402719	+	AT1G18600	utr3	first	23.5	0.302251
1	6402759	6402776	6402774	+	AT1G18600	utr3	middle	11	0.141479
1	6402776	6402811	6402792	+	AT1G18600	utr3	last	54.25	0.697749
1	6409194	6409223	6409207	+	AT1G18610	utr3	first	12	0.18677
1	6409270	6409280	6409275	+	AT1G18610	utr3	middle	30.5	0.474708
1	6409291	6409303	6409296	+	AT1G18610	utr3	last	33.75	0.525292
1	6414344	6414381	6414361	+	AT1G18620	utr3	single	40.3333	1
1	6416412	6416452	6416430	+	AT1G18630	utr3	first	77.5833	0.384266
1	6416452	6416482	6416474	+	AT1G18630	utr3_extended	last	124.317	0.615734
1	6425752	6425778	6425771	+	AT1G18660	utr3	first	36.1667	0.62
1	6425850	6425865	6425852	+	AT1G18660	utr3	last	22.1667	0.38
1	6434598	6434618	6434600	+	AT1G18690	intron	intron	11.5	NA
1	6443155	6443190	6443169	+	AT1G18700	utr3	first	54.4333	0.745322
1	6443190	6443223	6443210	+	AT1G18700	utr3	last	18.6	0.254678
1	6462220	6462237	6462220	+	AT1G18730	utr3	first	41.5	0.398082
1	6462278	6462305	6462285	+	AT1G18730	utr3	last	62.75	0.601918
1	6465411	6465430	6465417	+	AT1G18740	utr3	first	24	0.217195
1	6465430	6465451	6465443	+	AT1G18740	utr3	middle	86.5	0.782805
1	6465472	6465487	6465474	+	AT1G18740	utr3	middle	12	0.108597
1	6465487	6465501	6465499	+	AT1G18740	utr3_extended	last	10.75	0.0972851
1	6469935	6469970	6469954	+	AT1G18750	utr3	single	184.833	1
1	6511386	6511406	6511397	+	AT1G18860	utr3_extended	single	14.3333	1
1	6523257	6523271	6523260	+	AT1G18880	utr3	first	40.5	0.697074
1	6523283	6523310	6523305	+	AT1G18880	utr3	last	17.6	0.302926
1	6532604	6532616	6532607	+	AT1G18900	utr3	single	183.8	1
1	6551899	6551928	6551914	+	AT1G18950	utr3	first	35.3333	0.132046
1	6551928	6551956	6551955	+	AT1G18950	utr3	middle	78.5	0.293367
1	6551956	6551986	6551969	+	AT1G18950	utr3	middle	122.25	0.456867
1	6551986	6552016	6552003	+	AT1G18950	utr3	middle	145.333	0.543133
1	6552016	6552043	6552016	+	AT1G18950	utr3	middle	89	0.332607
1	6552043	6552060	6552057	+	AT1G18950	utr3	last	34.25	0.127998
1	6567503	6567538	6567519	+	AT1G19010	utr3	single	89.5	1
1	6568474	6568509	6568502	+	AT1G19020	utr3	first	57.6667	0.0618078
1	6568509	6568535	6568522	+	AT1G19020	utr3	middle	89	0.0953912
1	6568535	6568562	6568554	+	AT1G19020	utr3	middle	113.083	0.121204
1	6568562	6568597	6568575	+	AT1G19020	utr3	middle	819.917	0.878796
1	6568597	6568628	6568598	+	AT1G19020	utr3	last	26.0667	0.0279385
1	6586433	6586442	6586433	+	AT1G19080	utr3	first	21.5	0.505882
1	6586482	6586491	6586487	+	AT1G19080	utr3	last	21	0.494118
1	6605900	6605920	6605907	+	AT1G19110	utr3	first	266.5	0.956111
1	6605965	6605993	6605975	+	AT1G19110	utr3	last	12.2333	0.043889
1	6609324	6609358	6609345	+	AT1G19120	utr3	first	816.25	0.941917
1	6609358	6609377	6609368	+	AT1G19120	utr3	middle	50.3333	0.0580825
1	6609377	6609400	6609382	+	AT1G19120	utr3_extended	last	19.75	0.0227907
1	6613911	6613939	6613924	+	AT1G19150	utr3	single	15.7	1
1	6618955	6618965	6618955	+	AT1G19170	utr3	single	66.5	1
1	6623438	6623463	6623445	+	AT1G19180	utr3	first	203.5	0.840041
1	6623463	6623485	6623467	+	AT1G19180	utr3	last	38.75	0.159959
1	6624987	6624996	6624994	+	AT1G19190	utr3_extended	single	20	1
1	6665970	6665999	6665970	+	AT1G19270	utr3	first	58.1	0.29933
1	6665999	6666051	6666027	+	AT1G19270	utr3	last	136	0.70067
1	6690300	6690332	6690316	+	AT1G19350	utr3	first	11.5	0.0240586
1	6690332	6690360	6690347	+	AT1G19350	utr3	middle	269.5	0.563808
1	6690360	6690389	6690367	+	AT1G19350	utr3	middle	16.5	0.0345188
1	6690389	6690417	6690404	+	AT1G19350	utr3	middle	208.5	0.436192
1	6690417	6690442	6690430	+	AT1G19350	utr3	last	10.75	0.0224895
1	6711782	6711789	6711786	+	AT1G19397	utr3	single	71.3333	1
1	6730801	6730840	6730823	+	AT1G19440	utr3	first	41.5	0.527654
1	6730880	6730897	6730888	+	AT1G19440	utr3	middle	37.15	0.472346
1	6730963	6730967	6730963	+	AT1G19440	utr3_extended	last	11.3333	0.144098
1	6751491	6751531	6751513	+	AT1G19485	utr3	single	48.3333	1
1	6762698	6762715	6762698	+	AT1G19520	utr3	first	39.3333	0.0875209
1	6762715	6762747	6762732	+	AT1G19520	utr3	middle	264.5	0.588541
1	6762747	6762785	6762748	+	AT1G19520	utr3	last	184.917	0.411459
1	6764889	6764920	6764919	+	AT1G19530	utr3	first	11.8333	0.0148738
1	6764920	6764956	6764941	+	AT1G19530	utr3	middle	771.417	0.969624
1	6764956	6764976	6764970	+	AT1G19530	utr3	last	24.1667	0.030376
1	6777316	6777350	6777324	+	AT1G19580	utr3	first	117.667	0.515705
1	6777421	6777437	6777428	+	AT1G19580	utr3	middle	20.5	0.0898466
1	6777459	6777493	6777472	+	AT1G19580	utr3	last	110.5	0.484295
1	6781063	6781090	6781071	+	AT1G19600	utr3	first	1425.83	0.966557
1	6781090	6781115	6781093	+	AT1G19600	utr3	middle	49.3333	0.0334425
1	6781128	6781136	6781132	+	AT1G19600	utr3	last	13	0.00881256
1	6816728	6816736	6816732	+	AT1G19710	utr3	first	27.25	0.21499
1	6816750	6816764	6816755	+	AT1G19710	utr3	middle	14.5	0.114398
1	6816828	6816856	6816844	+	AT1G19710	utr3	middle	99.5	0.78501
1	6816908	6816923	6816909	+	AT1G19710	utr3_extended	last	10.5	0.0828402
1	6825300	6825311	6825308	+	AT1G19740	utr3	first	30.5	0.0122318
1	6825323	6825344	6825325	+	AT1G19740	utr3	middle	130.5	0.0523361
1	6825344	6825379	6825363	+	AT1G19740	utr3	middle	1140.5	0.457389
1	6825379	6825410	6825394	+	AT1G19740	utr3	middle	1353	0.542611
1	6825410	6825440	6825426	+	AT1G19740	utr3	middle	267.633	0.107332
1	6825440	6825456	6825447	+	AT1G19740	utr3	middle	76.1667	0.0305461
1	6825470	6825493	6825474	+	AT1G19740	utr3_extended	middle	70.0833	0.0281064
1	6825507	6825526	6825509	+	AT1G19740	utr3_extended	middle	120	0.0481251
1	6825541	6825545	6825542	+	AT1G19740	utr3_extended	last	33.5	0.0134349
1	6830327	6830331	6830327	+	AT1G19750	utr3	single	16	1
1	6833822	6833847	6833845	+	AT1G19770	utr3_extended	first	18.75	0.0379542
1	6833847	6833883	6833870	+	AT1G19770	utr3_extended	middle	422.267	0.854762
1	6833883	6833898	6833890	+	AT1G19770	utr3_extended	middle	47	0.0951385
1	6833938	6833963	6833961	+	AT1G19770	utr3_extended	last	71.75	0.145238
1	6848038	6848075	6848061	+	AT1G19800	utr3	first	55.6667	0.759091
1	6848092	6848115	6848103	+	AT1G19800	utr3	last	17.6667	0.240909
1	6891364	6891380	6891368	+	AT1G19850	utr3	single	10.5	1
1	6914439	6914478	6914461	+	AT1G19910	utr3	first	679.3	0.45909
1	6914478	6914517	6914478	+	AT1G19910	utr3	middle	193.5	0.130773
1	6914517	6914558	6914539	+	AT1G19910	utr3	last	800.367	0.54091
1	6926687	6926705	6926689	+	AT1G19950	utr3	single	57.6	1
1	6934999	6935003	6935001	+	AT1G19980	utr3	single	34	1
1	6936775	6936793	6936790	+	AT1G19990	utr3	single	156.333	1
1	6944949	6944978	6944974	+	AT1G20020	utr3	first	115.958	0.222961
1	6944978	6945019	6944994	+	AT1G20020	utr3	middle	404.125	0.777039
1	6945047	6945068	6945055	+	AT1G20020	utr3	last	26.4444	0.0508466
1	6950278	6950300	6950294	+	AT1G20050	utr3	first	15.5	0.370518
1	6950300	6950335	6950317	+	AT1G20050	utr3	last	26.3333	0.629482
1	6968854	6968877	6968865	+	AT1G20090	utr3	first	11.5	0.0148403
1	6968888	6968909	6968888	+	AT1G20090	utr3	middle	12.25	0.0158082
1	6968909	6968937	6968929	+	AT1G20090	utr3	last	762.667	0.984192
1	6974734	6974757	6974738	+	AT1G20110	utr3	first	632.5	0.719977
1	6974757	6974781	6974762	+	AT1G20110	utr3	middle	210	0.239044
1	6974793	6974819	6974803	+	AT1G20110	utr3	middle	67.5	0.0768355
1	6974819	6974848	6974834	+	AT1G20110	utr3	middle	246	0.280023
1	6974848	6974865	6974848	+	AT1G20110	utr3	last	38.5	0.0438247
1	6987224	6987241	6987228	+	AT1G20140	utr3	first	12.5	0.423729
1	6987282	6987287	6987284	+	AT1G20140	utr3	last	17	0.576271
1	7020452	7020473	7020452	+	AT1G20260	utr3	first	23.75	0.0471464
1	7020473	7020509	7020494	+	AT1G20260	utr3	middle	42.25	0.083871
1	7020536	7020548	7020538	+	AT1G20260	utr3	middle	70.6667	0.140281
1	7020548	7020573	7020557	+	AT1G20260	utr3	middle	432.583	0.858726
1	7020573	7020611	7020589	+	AT1G20260	utr3	middle	71.1667	0.141274
1	7020611	7020635	7020632	+	AT1G20260	utr3	last	22	0.0436725
1	7031422	7031452	7031434	+	AT1G20300	utr3	first	35	0.495283
1	7031452	7031487	7031452	+	AT1G20300	utr3	last	35.6667	0.504717
1	7093292	7093301	7093297	+	AT1G20460	utr3	single	11.25	1
1	7115323	7115344	7115326	+	AT1G20540	utr3	first	11.5	0.164875
1	7115344	7115365	7115361	+	AT1G20540	utr3	last	58.25	0.835125
1	7130551	7130593	7130576	+	AT1G20580	utr3	first	1275.33	0.831739
1	7130593	7130611	7130593	+	AT1G20580	utr3	last	258	0.168261
1	7134328	7134370	7134351	+	AT1G20600	utr3	single	241.833	1
1	7146352	7146394	7146376	+	AT1G20620	utr3	first	28.8333	0.014566
1	7146394	7146427	7146412	+	AT1G20620	utr3	middle	1533	0.774438
1	7146427	7146455	7146429	+	AT1G20620	utr3	middle	446.5	0.225562
1	7146455	7146476	7146465	+	AT1G20620	utr3	last	41.3889	0.0209088
1	7149796	7149819	7149813	+	AT1G20630	utr3	single	10.9167	1
1	7158213	7158223	7158216	+	AT1G20640	utr3	single	17.25	1
1	7178591	7178603	7178594	+	AT1G20693	utr3	first	11	0.0554296
1	7178677	7178707	7178686	+	AT1G20693	utr3	middle	17.2	0.0866717
1	7178707	7178741	7178727	+	AT1G20693	utr3	middle	149.2	0.751827
1	7178741	7178769	7178748	+	AT1G20693	utr3	middle	13.4167	0.0676073
1	7178798	7178830	7178813	+	AT1G20693	utr3	last	49.25	0.248173
1	7181335	7181374	7181357	+	AT1G20696	utr3	first	14.5	0.0239735
1	7181387	7181393	7181387	+	AT1G20696	utr3	middle	14.75	0.0243869
1	7181406	7181420	7181410	+	AT1G20696	utr3	middle	187.167	0.309452
1	7181420	7181454	7181433	+	AT1G20696	utr3	middle	417.667	0.690548
1	7181454	7181476	7181455	+	AT1G20696	utr3	last	76	0.125654
1	7214950	7214969	7214967	+	AT1G20760	utr3	first	13.3333	0.0698995
1	7214969	7215005	7214988	+	AT1G20760	utr3	last	177.417	0.9301
1	7220729	7220755	7220745	+	AT1G20780	utr3	first	14	0.149599
1	7220755	7220769	7220765	+	AT1G20780	utr3	middle	30.75	0.328584
1	7220781	7220795	7220784	+	AT1G20780	utr3	middle	62.8333	0.671416
1	7220808	7220825	7220812	+	AT1G20780	utr3	last	21.5	0.229742
1	7233529	7233547	7233532	+	AT1G20810	utr3	first	15.1	0.0958122
1	7233559	7233583	7233566	+	AT1G20810	utr3	last	142.5	0.904188
1	7239597	7239638	7239616	+	AT1G20823	utr3	first	90.9	0.852987
1	7239638	7239665	7239660	+	AT1G20823	utr3	last	15.6667	0.147013
1	7244848	7244867	7244850	+	AT1G20830	utr3	first	353	0.945958
1	7244903	7244919	7244903	+	AT1G20830	utr3	middle	16.1667	0.0433229
1	7244930	7244938	7244934	+	AT1G20830	utr3	last	20.1667	0.054042
1	7253657	7253679	7253672	+	AT1G20850	utr3	single	29.5833	1
1	7274042	7274061	7274055	+	AT1G20900	utr3	first	150.5	0.196347
1	7274061	7274093	7274074	+	AT1G20900	utr3_extended	middle	616	0.803653
1	7274150	7274160	7274158	+	AT1G20900	utr3_extended	last	12.5	0.0163079
1	7289171	7289181	7289171	+	AT1G20920	utr3	first	10.3333	0.139483
1	7289213	7289228	7289220	+	AT1G20920	utr3	middle	13.5	0.182227
1	7289306	7289308	7289306	+	AT1G20920	utr3	middle	10	0.134983
1	7289740	7289779	7289764	+	AT1G20920	utr3	middle	35	0.472441
1	7289779	7289802	7289793	+	AT1G20920	utr3	middle	39.0833	0.527559
1	7289815	7289824	7289815	+	AT1G20920	utr3	last	14.75	0.1991
1	7319355	7319360	7319358	+	AT1G20970	utr3	first	12	0.0230806
1	7319373	7319404	7319397	+	AT1G20970	utr3	middle	25	0.0480846
1	7319432	7319461	7319445	+	AT1G20970	utr3	middle	321.583	0.618529
1	7319461	7319493	7319476	+	AT1G20970	utr3	middle	179.417	0.345087
1	7319493	7319534	7319509	+	AT1G20970	utr3	last	198.333	0.381471
1	7329152	7329157	7329154	+	AT1G20980	utr3	first	15	0.0523956
1	7329251	7329256	7329251	+	AT1G20980	utr3	middle	10.5	0.036677
1	7329334	7329368	7329349	+	AT1G20980	utr3	middle	249.867	0.872795
1	7329368	7329390	7329386	+	AT1G20980	utr3	last	36.4167	0.127205
1	7339227	7339257	7339239	+	AT1G21000	utr3	first	11.4	0.0253062
1	7339418	7339454	7339433	+	AT1G21000	utr3	last	439.083	0.974694
1	7347120	7347132	7347120	+	AT1G21010	utr3	single	10.8333	1
1	7367708	7367717	7367710	+	AT1G21050	utr3	single	15	1
1	7375712	7375729	7375728	+	AT1G21065	utr3	first	51.5	0.0162512
1	7375729	7375764	7375745	+	AT1G21065	utr3	middle	3064.75	0.967103
1	7375764	7375796	7375782	+	AT1G21065	utr3	last	104.25	0.0328968
1	7386230	7386244	7386242	+	AT1G21090	utr3	first	15.5	0.142857
1	7386379	7386384	7386379	+	AT1G21090	utr3	middle	10.2	0.0940092
1	7386395	7386411	7386406	+	AT1G21090	utr3	middle	84.5	0.778802
1	7386507	7386511	7386508	+	AT1G21090	utr3	last	24	0.221198
1	7419560	7419572	7419564	+	AT1G21170	utr3	first	29.25	0.0962963
1	7419583	7419594	7419586	+	AT1G21170	utr3	middle	274.5	0.903704
1	7419624	7419656	7419647	+	AT1G21170	utr3_extended	last	22.5333	0.0741838
1	7423096	7423127	7423116	+	AT1G21200	utr3	first	19	0.361905
1	7423168	7423188	7423173	+	AT1G21200	utr3	middle	14.3333	0.273016
1	7423199	7423227	7423210	+	AT1G21200	utr3	last	33.5	0.638095
1	7441943	7441961	7441955	+	AT1G21250	utr3	first	15.5	0.479381
1	7441974	7441986	7441977	+	AT1G21250	utr3	last	16.8333	0.520619
1	7496285	7496331	7496309	+	AT1G21400	utr3	first	69.5	0.169857
1	7496331	7496374	7496352	+	AT1G21400	utr3	middle	339.667	0.830143
1	7496374	7496407	7496374	+	AT1G21400	utr3	middle	57.3333	0.140122
1	7496407	7496433	7496417	+	AT1G21400	utr3	middle	27.6667	0.0676171
1	7496448	7496467	7496464	+	AT1G21400	utr3	middle	10.6667	0.0260692
1	7496478	7496515	7496489	+	AT1G21400	utr3	last	13.375	0.0326884
1	7499543	7499582	7499558	+	AT1G21410	utr3	first	150.833	0.668108
1	7499582	7499616	7499606	+	AT1G21410	utr3	last	74.9286	0.331892
1	7511609	7511650	7511625	+	AT1G21450	utr3	first	43.4333	0.122233
1	7511650	7511696	7511674	+	AT1G21450	utr3	middle	258.333	0.727017
1	7511696	7511734	7511718	+	AT1G21450	utr3	last	97	0.272983
1	7556966	7556990	7556979	+	AT1G21560	utr3	single	162.667	1
1	7578874	7578894	7578881	+	AT1G21610	utr3	first	17.6667	0.438017
1	7578923	7578940	7578927	+	AT1G21610	utr3	last	22.6667	0.561983
1	7587952	7587971	7587954	+	AT1G21630	utr3	first	99	0.0924514
1	7588057	7588096	7588070	+	AT1G21630	utr3	middle	116.5	0.108794
1	7588096	7588134	7588123	+	AT1G21630	utr3	middle	233	0.217588
1	7588134	7588161	7588147	+	AT1G21630	utr3	middle	837.833	0.782412
1	7588161	7588182	7588175	+	AT1G21630	utr3_extended	last	18.5	0.0172763
1	7592798	7592823	7592810	+	AT1G21640	utr3	first	12.8167	0.0833153
1	7592823	7592844	7592836	+	AT1G21640	utr3	middle	128.5	0.83532
1	7592880	7592893	7592880	+	AT1G21640	utr3	middle	22	0.143012
1	7592912	7592934	7592917	+	AT1G21640	utr3_extended	middle	16.5	0.107259
1	7592934	7592952	7592950	+	AT1G21640	utr3_extended	last	25.3333	0.16468
1	7609053	7609076	7609061	+	AT1G21660	utr3	first	27.3333	0.653386
1	7609133	7609141	7609135	+	AT1G21660	utr3	last	14.5	0.346614
1	7612558	7612579	7612563	+	AT1G21670	utr3	single	13.6667	1
1	7615198	7615240	7615220	+	AT1G21680	utr3	first	17.8333	0.322289
1	7615240	7615279	7615259	+	AT1G21680	utr3	last	37.5	0.677711
1	7618497	7618511	7618497	+	AT1G21690	utr3	first	11	0.127168
1	7618511	7618528	7618524	+	AT1G21690	utr3	middle	72.8333	0.842004
1	7618539	7618542	7618539	+	AT1G21690	utr3	last	13.6667	0.157996
1	7626096	7626111	7626102	+	AT1G21710	utr3	first	42.3333	0.786378
1	7626143	7626150	7626147	+	AT1G21710	utr3_extended	last	11.5	0.213622
1	7628161	7628182	7628165	+	AT1G21720	utr3	first	18.75	0.016781
1	7628182	7628212	7628199	+	AT1G21720	utr3	middle	60.1667	0.0538484
1	7628212	7628242	7628224	+	AT1G21720	utr3	middle	948.333	0.848747
1	7628242	7628264	7628260	+	AT1G21720	utr3	last	169	0.151253
1	7636554	7636580	7636567	+	AT1G21730	utr3	first	177.5	0.632423
1	7636580	7636608	7636593	+	AT1G21730	utr3	middle	103.167	0.367577
1	7636608	7636636	7636611	+	AT1G21730	utr3	last	16	0.0570071
1	7645180	7645185	7645180	+	AT1G21740	utr3	single	32.5	1
1	7648712	7648730	7648715	+	AT1G21750	utr3	first	275.5	0.20161
1	7648741	7648760	7648743	+	AT1G21750	utr3	middle	89.6667	0.0656178
1	7648760	7648789	7648776	+	AT1G21750	utr3	middle	1091	0.79839
1	7648789	7648807	7648789	+	AT1G21750	utr3	middle	250.833	0.183559
1	7648819	7648838	7648823	+	AT1G21750	utr3	middle	12.5	0.00914746
1	7648852	7648866	7648854	+	AT1G21750	utr3	last	24.1667	0.0176851
1	7651727	7651763	7651741	+	AT1G21760	utr3	first	37	0.145602
1	7651763	7651799	7651785	+	AT1G21760	utr3	middle	177.25	0.697514
1	7651799	7651822	7651799	+	AT1G21760	utr3	last	76.8667	0.302486
1	7653971	7653993	7653973	+	AT1G21780	utr3	first	16	0.0123409
1	7653993	7654026	7654013	+	AT1G21780	utr3	last	1280.5	0.987659
1	7655867	7655886	7655881	+	AT1G21790	utr3	single	49.6667	1
1	7667662	7667695	7667679	+	AT1G21840	utr3	first	18.3333	0.639535
1	7667695	7667729	7667699	+	AT1G21840	utr3	last	10.3333	0.360465
1	7682589	7682621	7682606	+	AT1G21880	utr3	first	167.7	0.831433
1	7682621	7682648	7682635	+	AT1G21880	utr3	last	34	0.168567
1	7697513	7697533	7697518	+	AT1G21910	utr3	first	93.5	0.446301
1	7697533	7697556	7697547	+	AT1G21910	utr3	middle	44.6667	0.213206
1	7697567	7697588	7697572	+	AT1G21910	utr3	middle	116	0.553699
1	7697588	7697615	7697595	+	AT1G21910	utr3	middle	90.5	0.431981
1	7697716	7697745	7697733	+	AT1G21910	utr3	middle	39.6667	0.18934
1	7697822	7697826	7697822	+	AT1G21910	utr3	last	10	0.0477327
1	7714368	7714397	7714384	+	AT1G21930	utr3	single	21.9	1
1	7738546	7738556	7738552	+	AT1G21980	utr3	first	49	0.793522
1	7738567	7738597	7738578	+	AT1G21980	utr3	last	12.75	0.206478
1	7757309	7757324	7757313	+	AT1G22020	utr3	first	10.8333	0.0712563
1	7757337	7757363	7757343	+	AT1G22020	utr3	middle	133.533	0.878316
1	7757374	7757385	7757383	+	AT1G22020	utr3	last	18.5	0.121684
1	7770039	7770059	7770048	+	AT1G22040	utr3	single	16.8333	1
1	7773136	7773158	7773151	+	AT1G22050	utr3	single	13.8333	1
1	7786240	7786245	7786244	+	AT1G22065	utr3	first	11	0.216749
1	7786291	7786304	7786300	+	AT1G22065	utr3	last	39.75	0.783251
1	7791997	7792004	7791999	+	AT1G22070	utr3	first	12.6	0.0533522
1	7792062	7792068	7792062	+	AT1G22070	utr3	middle	29	0.122795
1	7792094	7792127	7792113	+	AT1G22070	utr3	middle	207.167	0.877205
1	7792127	7792145	7792141	+	AT1G22070	utr3_extended	last	15.6667	0.0663373
1	7823926	7823934	7823931	+	AT1G22160	utr3	first	21.5	0.632353
1	7823948	7823962	7823952	+	AT1G22160	utr3	last	12.5	0.367647
1	7828317	7828323	7828317	+	AT1G22170	utr3	single	30.25	1
1	7837128	7837172	7837148	+	AT1G22190	utr3	first	42.25	0.10391
1	7837231	7837265	7837251	+	AT1G22190	utr3	middle	329.333	0.809969
1	7837265	7837287	7837279	+	AT1G22190	utr3	last	77.2667	0.190031
1	7847711	7847715	7847712	+	AT1G22220	utr3	first	12.3333	0.187579
1	7847754	7847787	7847772	+	AT1G22220	utr3	middle	31.25	0.475285
1	7847787	7847802	7847801	+	AT1G22220	utr3	last	34.5	0.524715
1	7866010	7866031	7866015	+	AT1G22270	utr3	first	18.8333	0.165343
1	7866031	7866049	7866032	+	AT1G22270	utr3	middle	14.6667	0.128763
1	7866060	7866094	7866080	+	AT1G22270	utr3	middle	94.5714	0.830268
1	7866094	7866121	7866098	+	AT1G22270	utr3	last	19.3333	0.169732
1	7875772	7875780	7875777	+	AT1G22280	utr3	first	17.6667	0.0829097
1	7875793	7875816	7875799	+	AT1G22280	utr3	middle	31.75	0.149003
1	7875816	7875837	7875833	+	AT1G22280	utr3	middle	61.75	0.289793
1	7875853	7875881	7875866	+	AT1G22280	utr3	middle	88.6667	0.416113
1	7875881	7875906	7875895	+	AT1G22280	utr3	last	124.417	0.583887
1	7889469	7889499	7889489	+	AT1G22330	utr3	single	16	1
1	7914843	7914877	7914864	+	AT1G22410	utr3	first	124.5	0.0222589
1	7914922	7914939	7914926	+	AT1G22410	utr3	middle	5169	0.924146
1	7914939	7914968	7914951	+	AT1G22410	utr3	middle	303.773	0.0543104
1	7914968	7915004	7914984	+	AT1G22410	utr3	last	424.273	0.0758541
1	7921745	7921764	7921758	+	AT1G22430	utr3	first	22.1667	0.19985
1	7921764	7921785	7921782	+	AT1G22430	utr3	middle	11	0.0991736
1	7921785	7921803	7921800	+	AT1G22430	utr3	middle	65.8333	0.593539
1	7921818	7921839	7921828	+	AT1G22430	utr3	last	45.0833	0.406461
1	7924987	7925025	7925002	+	AT1G22440	utr3	single	44.1667	1
1	7927073	7927109	7927092	+	AT1G22450	utr3	first	78.1667	0.707391
1	7927148	7927167	7927162	+	AT1G22450	utr3	middle	18.75	0.169683
1	7927179	7927203	7927190	+	AT1G22450	utr3	middle	32.3333	0.292609
1	7927203	7927225	7927216	+	AT1G22450	utr3	last	25.6667	0.232278
1	7950890	7950903	7950892	+	AT1G22500	utr3	single	24	1
1	7966325	7966343	7966342	+	AT1G22540	utr3	first	20	0.228571
1	7966343	7966373	7966358	+	AT1G22540	utr3	middle	65.5	0.748571
1	7966373	7966389	7966387	+	AT1G22540	utr3	middle	16	0.182857
1	7966424	7966437	7966424	+	AT1G22540	utr3	last	22	0.251429
1	7984158	7984160	7984158	+	AT1G22590	utr3	first	21	0.200957
1	7984184	7984219	7984208	+	AT1G22590	utr3	last	83.5	0.799043
1	7997743	7997758	7997751	+	AT1G22610	utr3_extended	single	90	1
1	8004244	8004263	8004246	+	AT1G22630	utr3	single	14.8333	1
1	8007259	8007292	8007276	+	AT1G22640	utr3	single	17.6667	1
1	8021620	8021655	8021631	+	AT1G22660	utr3	single	18.6667	1
1	8028075	8028102	8028099	+	AT1G22690	utr3	first	14	0.0144853
1	8028117	8028132	8028124	+	AT1G22690	utr3	last	952.5	0.985515
1	8050661	8050689	8050678	+	AT1G22740	utr3	first	21	0.0438642
1	8050689	8050721	8050703	+	AT1G22740	utr3	middle	457.75	0.956136
1	8050795	8050798	8050796	+	AT1G22740	utr3_extended	last	13	0.027154
1	8052822	8052847	8052844	+	AT1G22750	utr3	first	42.3333	0.052588
1	8052847	8052879	8052862	+	AT1G22750	utr3	middle	409	0.508075
1	8052891	8052917	8052903	+	AT1G22750	utr3	last	396	0.491925
1	8067536	8067543	8067536	+	AT1G22770	utr3	first	42.5	0.0331341
1	8067583	8067599	8067598	+	AT1G22770	utr3	middle	20.5	0.0159823
1	8067610	8067627	8067614	+	AT1G22770	utr3	middle	97.1667	0.0757536
1	8067627	8067655	8067633	+	AT1G22770	utr3	middle	129.833	0.101221
1	8067655	8067690	8067669	+	AT1G22770	utr3	last	1152.83	0.898779
1	8069293	8069334	8069310	+	AT1G22780	utr3	single	104.133	1
1	8071386	8071420	8071402	+	AT1G22790	utr3	first	43	0.0357192
1	8071420	8071453	8071438	+	AT1G22790	utr3	middle	1149.33	0.954728
1	8071453	8071473	8071453	+	AT1G22790	utr3	last	54.5	0.045272
1	8079114	8079130	8079117	+	AT1G22830	utr3	single	11.5	1
1	8080410	8080426	8080412	+	AT1G22840	utr3	first	47.6667	0.00651896
1	8080440	8080457	8080452	+	AT1G22840	utr3	middle	122.5	0.0167533
1	8080457	8080492	8080473	+	AT1G22840	utr3	middle	6311	0.863102
1	8080492	8080523	8080492	+	AT1G22840	utr3	last	1001	0.136898
1	8089194	8089219	8089203	+	AT1G22860	utr3	first	16	0.0832611
1	8089219	8089244	8089235	+	AT1G22860	utr3	middle	167.167	0.869905
1	8089257	8089263	8089257	+	AT1G22860	utr3	last	25	0.130095
1	8094434	8094443	8094438	+	AT1G22870	utr3	single	24.5	1
1	8097694	8097697	8097694	+	AT1G22880	utr3	single	34.5	1
1	8101284	8101299	8101288	+	AT1G22882	utr3	first	78.6667	0.334515
1	8102277	8102310	8102297	+	AT1G22882	utr3_extended	middle	156.5	0.665485
1	8102310	8102337	8102310	+	AT1G22882	utr3_extended	middle	11.1667	0.0474841
1	8102337	8102360	8102350	+	AT1G22882	utr3_extended	middle	50.75	0.215804
1	8102372	8102387	8102374	+	AT1G22882	utr3_extended	middle	13.5	0.0574061
1	8102387	8102412	8102398	+	AT1G22882	utr3_extended	last	24.0833	0.10241
1	8121997	8122000	8121998	+	AT1G22930	utr3	first	13	0.12884
1	8122027	8122042	8122029	+	AT1G22930	utr3	middle	84.1	0.833499
1	8122069	8122085	8122083	+	AT1G22930	utr3	middle	11.5	0.113974
1	8122098	8122126	8122106	+	AT1G22930	utr3	last	16.8	0.166501
1	8125069	8125095	8125081	+	AT1G22940	utr3_extended	first	14	0.538462
1	8125095	8125114	8125096	+	AT1G22940	utr3_extended	last	12	0.461538
1	8140121	8140134	8140127	+	AT1G22990	utr3	single	11.5	1
1	8145053	8145077	8145060	+	AT1G23000	utr3	single	21.5	1
1	8165555	8165588	8165574	+	AT1G23040	utr3	first	33.3333	0.534759
1	8165704	8165710	8165706	+	AT1G23040	utr3	middle	29	0.465241
1	8165748	8165768	8165762	+	AT1G23040	utr3	last	16.8333	0.270053
1	8196458	8196474	8196470	+	AT1G23100	utr3	single	686	1
1	8201082	8201110	8201107	+	AT1G23130	utr3	first	15.8333	0.0142643
1	8201110	8201141	8201128	+	AT1G23130	utr3	middle	213.167	0.192042
1	8201141	8201168	8201164	+	AT1G23130	utr3	middle	105.917	0.0954204
1	8201168	8201198	8201182	+	AT1G23130	utr3	middle	896.833	0.807958
1	8201198	8201236	8201214	+	AT1G23130	utr3	last	22.3333	0.0201201
1	8219576	8219590	8219583	+	AT1G23180	utr3	first	21.5	0.551282
1	8219628	8219655	8219631	+	AT1G23180	utr3	last	17.5	0.448718
1	8224358	8224388	8224378	+	AT1G23190	utr3	first	260	0.113624
1	8224388	8224425	8224402	+	AT1G23190	utr3	middle	2022.67	0.883936
1	8224425	8224461	8224448	+	AT1G23190	utr3	middle	265.583	0.116064
1	8224461	8224478	8224468	+	AT1G23190	utr3	last	25.25	0.0110346
1	8244272	8244281	8244272	+	AT1G23220	utr3	first	22.6667	0.0640181
1	8244295	8244333	8244317	+	AT1G23220	utr3	middle	331.4	0.935982
1	8244333	8244357	8244348	+	AT1G23220	utr3	last	22	0.0621352
1	8251900	8251926	8251911	+	AT1G23230	utr3	first	13	0.192831
1	8251926	8251958	8251941	+	AT1G23230	utr3_extended	middle	26.1667	0.388133
1	8251958	8252000	8251974	+	AT1G23230	utr3_extended	last	41.25	0.611867
1	8263497	8263534	8263515	+	AT1G23290	utr3	first	19.1667	0.0083418
1	8263534	8263569	8263552	+	AT1G23290	utr3	middle	917.167	0.399173
1	8263569	8263599	8263586	+	AT1G23290	utr3	middle	1380.5	0.600827
1	8263599	8263625	8263612	+	AT1G23290	utr3	middle	96.1667	0.0418541
1	8263625	8263655	8263636	+	AT1G23290	utr3	middle	70.1667	0.0305382
1	8263655	8263684	8263658	+	AT1G23290	utr3	last	57.25	0.0249166
1	8315496	8315518	8315505	+	AT1G23410	utr3	first	29.3333	0.39774
1	8315518	8315545	8315542	+	AT1G23410	utr3	middle	43.75	0.59322
1	8315545	8315561	8315559	+	AT1G23410	utr3	last	30	0.40678
1	8323368	8323379	8323371	+	AT1G23440	intron	intron	24	0.0282797
1	8324102	8324115	8324103	+	AT1G23440	utr3	first	37.3333	0.0439906
1	8324203	8324222	8324205	+	AT1G23440	utr3	middle	53.1667	0.0626473
1	8324222	8324255	8324239	+	AT1G23440	utr3	last	795.5	0.937353
1	8336369	8336398	8336383	+	AT1G23480	utr3	single	36.8	1
1	8338499	8338527	8338523	+	AT1G23490	utr3	first	26.375	0.0161942
1	8338527	8338561	8338543	+	AT1G23490	utr3	middle	375.475	0.230541
1	8338561	8338602	8338579	+	AT1G23490	utr3	middle	1209.17	0.742427
1	8338602	8338637	8338602	+	AT1G23490	utr3	middle	419.5	0.257573
1	8338651	8338686	8338673	+	AT1G23490	utr3	last	63.5	0.0389889
1	8346551	8346579	8346571	+	AT1G23530	utr3	first	15.5	0.191358
1	8346632	8346659	8346647	+	AT1G23530	utr3	last	65.5	0.808642
1	8386341	8386345	8386343	+	AT1G23710	utr3	single	51	1
1	8391537	8391565	8391558	+	AT1G23720	utr3	first	51.8333	0.767901
1	8391577	8391586	8391577	+	AT1G23720	utr3	last	15.6667	0.232099
1	8398136	8398155	8398153	+	AT1G23730	utr3	single	16.25	1
1	8422855	8422891	8422873	+	AT1G23820	utr3	first	77.25	0.449782
1	8422891	8422920	8422895	+	AT1G23820	utr3	middle	94.5	0.550218
1	8422979	8423006	8422983	+	AT1G23820	utr3	last	10.5833	0.0616206
1	8435702	8435721	8435713	+	AT1G23880	utr5	utr5	25.25	NA
1	8435736	8435757	8435736	+	AT1G23880	utr5	utr5	48.8333	NA
1	8435757	8435795	8435777	+	AT1G23880	utr5	utr5	349.767	NA
1	8435795	8435828	8435812	+	AT1G23880	utr5	utr5	26.5	NA
1	8447386	8447407	8447403	+	AT1G23900	utr3	first	31	0.135371
1	8447478	8447505	8447492	+	AT1G23900	utr3	middle	25	0.10917
1	8447505	8447527	8447518	+	AT1G23900	utr3	last	198	0.864629
1	8505484	8505487	8505485	+	AT1G24030	utr3_extended	single	14	1
1	8508737	8508771	8508767	+	AT1G24050	utr3	first	119.25	0.143978
1	8508771	8508807	8508786	+	AT1G24050	utr3	last	709	0.856022
1	8523119	8523144	8523136	+	AT1G24090	utr3	single	24	1
1	8524857	8524859	8524857	+	AT1G24095	utr3	single	22.5	1
1	8541723	8541741	8541737	+	AT1G24145	utr3	first	29.6667	0.706349
1	8541752	8541762	8541759	+	AT1G24145	utr3	last	12.3333	0.293651
1	8545443	8545463	8545445	+	AT1G24148	utr3	first	37	0.440476
1	8545495	8545513	8545502	+	AT1G24148	utr3	middle	15.3333	0.18254
1	8545546	8545568	8545549	+	AT1G24148	utr3	middle	47	0.559524
1	8545568	8545590	8545587	+	AT1G24148	utr3	last	23.5	0.279762
1	8551998	8552011	8551998	+	AT1G24150	utr3	first	23	0.547619
1	8552011	8552039	8552019	+	AT1G24150	utr3	middle	17.7778	0.42328
1	8552062	8552086	8552064	+	AT1G24150	utr3	last	19	0.452381
1	8588074	8588099	8588083	+	AT1G24240	utr3	first	51.75	0.564238
1	8588099	8588117	8588100	+	AT1G24240	utr3	middle	12	0.130838
1	8588158	8588180	8588175	+	AT1G24240	utr3	last	39.9667	0.435762
1	8603780	8603802	8603799	+	AT1G24265	utr3	single	25.1667	1
1	8612528	8612541	8612537	+	AT1G24280	utr3	first	81	0.359202
1	8612572	8612583	8612578	+	AT1G24280	utr3	last	144.5	0.640798
1	8626346	8626379	8626363	+	AT1G24310	utr3	first	149	0.77069
1	8626397	8626423	8626409	+	AT1G24310	utr3_extended	middle	13.0833	0.0676724
1	8626423	8626450	8626437	+	AT1G24310	utr3_extended	middle	44.3333	0.22931
1	8626450	8626474	8626458	+	AT1G24310	utr3_extended	last	25.8333	0.133621
1	8638985	8639004	8638988	+	AT1G24340	utr3_extended	first	14.75	0.161056
1	8639004	8639029	8639020	+	AT1G24340	utr3_extended	last	76.8333	0.838944
1	8643406	8643428	8643413	+	AT1G24360	utr3	first	151	0.130906
1	8643428	8643458	8643443	+	AT1G24360	utr3	middle	861.667	0.747002
1	8643458	8643488	8643459	+	AT1G24360	utr3	last	291.833	0.252998
1	8663882	8663901	8663893	+	AT1G24440	utr3	first	15	0.4
1	8663901	8663923	8663908	+	AT1G24440	utr3	last	22.5	0.6
1	8665114	8665131	8665116	+	AT1G24450	utr3	first	50.3333	0.154476
1	8665143	8665159	8665143	+	AT1G24450	utr3	middle	28.8333	0.088491
1	8665159	8665192	8665174	+	AT1G24450	utr3	middle	110.833	0.340153
1	8665192	8665229	8665224	+	AT1G24450	utr3	middle	87.3667	0.268133
1	8665229	8665261	8665248	+	AT1G24450	utr3	last	215	0.659847
1	8672507	8672547	8672523	+	AT1G24460	utr3	single	148	1
1	8685187	8685198	8685189	+	AT1G24490	utr3	first	10.5	0.0103482
1	8685218	8685254	8685234	+	AT1G24490	utr3	middle	59.1667	0.0583114
1	8685254	8685286	8685273	+	AT1G24490	utr3_extended	last	955.5	0.941689
1	8694546	8694567	8694564	+	AT1G24530	utr3	first	98.8333	0.219744
1	8694580	8694616	8694597	+	AT1G24530	utr3	middle	46	0.102275
1	8694616	8694659	8694635	+	AT1G24530	utr3	middle	193.267	0.429704
1	8694659	8694695	8694682	+	AT1G24530	utr3	middle	256.5	0.570296
1	8694695	8694718	8694704	+	AT1G24530	utr3	middle	52	0.115616
1	8694718	8694735	8694728	+	AT1G24530	utr3_extended	last	10	0.0222338
1	8705771	8705810	8705788	+	AT1G24560	utr3	single	92.4333	1
1	8755395	8755417	8755404	+	AT1G24706	utr3	first	15.8333	0.133115
1	8755417	8755451	8755429	+	AT1G24706	utr3	middle	31.3333	0.263428
1	8755501	8755537	8755520	+	AT1G24706	utr3	last	87.6111	0.736572
1	8836847	8836870	8836855	+	AT1G25211	utr3	first	390	0.886364
1	8836898	8836920	8836910	+	AT1G25211	utr3	last	50	0.113636
1	8861228	8861269	8861243	+	AT1G25275	utr3	first	82.9	0.111325
1	8861269	8861309	8861294	+	AT1G25275	utr3	middle	448.667	0.602507
1	8861309	8861337	8861324	+	AT1G25275	utr3	middle	296	0.397493
1	8861337	8861356	8861343	+	AT1G25275	utr3	middle	29.6667	0.0398389
1	8861376	8861402	8861391	+	AT1G25275	utr3	last	39.3333	0.0528201
1	8866750	8866773	8866770	+	AT1G25280	utr3	first	47.4167	0.275946
1	8866773	8866804	8866787	+	AT1G25280	utr3	middle	124.417	0.724054
1	8866804	8866824	8866805	+	AT1G25280	utr3	last	23.5	0.13676
1	8869097	8869113	8869097	+	AT1G25290	utr3	first	12.5	0.474684
1	8869113	8869139	8869128	+	AT1G25290	utr3	last	13.8333	0.525316
1	8880304	8880311	8880309	+	AT1G25320	utr3	single	23.3333	1
1	8905950	8905986	8905970	+	AT1G25380	utr3	first	604.5	0.423171
1	8905986	8906019	8906001	+	AT1G25380	utr3	middle	824	0.576829
1	8906019	8906053	8906037	+	AT1G25380	utr3	last	23.8333	0.0166842
1	8918059	8918074	8918059	+	AT1G25420	utr3	first	37	0.3444
1	8918074	8918109	8918089	+	AT1G25420	utr3	middle	15.5833	0.145051
1	8918180	8918218	8918196	+	AT1G25420	utr3	last	70.4333	0.6556
1	8955026	8955066	8955051	+	AT1G25490	utr3	first	1124	0.975694
1	8955066	8955099	8955080	+	AT1G25490	utr3	middle	28	0.0243056
1	8955099	8955135	8955118	+	AT1G25490	utr3	last	15.4167	0.0133825
1	8964447	8964481	8964464	+	AT1G25520	utr3	single	116.083	1
1	9056769	9056782	9056769	+	AT1G26180	utr3	first	25.5	0.212058
1	9056846	9056870	9056849	+	AT1G26180	utr3	middle	27.8333	0.231462
1	9056870	9056912	9056890	+	AT1G26180	utr3	last	92.4167	0.768538
1	9068174	9068192	9068187	+	AT1G26210	utr3	first	13.3333	0.0489656
1	9068203	9068230	9068206	+	AT1G26210	utr3	last	258.967	0.951034
1	9085354	9085376	9085358	+	AT1G26250	utr3	first	29	0.151832
1	9085376	9085398	9085394	+	AT1G26250	utr3	middle	73	0.382199
1	9085464	9085490	9085471	+	AT1G26250	utr3_extended	last	118	0.617801
1	9114952	9114991	9114971	+	AT1G26340	utr3	single	394.167	1
1	9154565	9154587	9154570	+	AT1G26460	utr3	first	32.1667	0.0799834
1	9154624	9154629	9154624	+	AT1G26460	utr3	middle	21	0.0522172
1	9154687	9154718	9154712	+	AT1G26460	utr3	middle	46.75	0.116245
1	9154718	9154745	9154737	+	AT1G26460	utr3	last	355.417	0.883755
1	9156182	9156216	9156194	+	AT1G26470	utr3	first	89.5	0.193933
1	9156216	9156250	9156238	+	AT1G26470	utr3	last	372	0.806067
1	9167482	9167498	9167488	+	AT1G26530	utr3	single	45.5	1
1	9172861	9172898	9172872	+	AT1G26550	utr3	first	224.5	0.349779
1	9172898	9172948	9172923	+	AT1G26550	utr3	middle	417.333	0.650221
1	9172948	9172979	9172973	+	AT1G26550	utr3	last	12.9048	0.0201061
1	9181795	9181822	9181796	+	AT1G26560	utr3	single	36	1
1	9184387	9184408	9184391	+	AT1G26570	utr3	single	105.667	1
1	9187382	9187404	9187385	+	AT1G26580	utr3	first	61.5	0.446191
1	9187404	9187436	9187422	+	AT1G26580	utr3	middle	12.8	0.0928658
1	9187459	9187487	9187469	+	AT1G26580	utr3	middle	59.75	0.433495
1	9187487	9187508	9187504	+	AT1G26580	utr3	last	76.3333	0.553809
1	9207198	9207217	9207200	+	AT1G26630	utr3	first	237.833	0.0398341
1	9207217	9207249	9207245	+	AT1G26630	utr3	middle	125.6	0.0210364
1	9207249	9207281	9207280	+	AT1G26630	utr3	middle	2032.1	0.340351
1	9207281	9207315	9207299	+	AT1G26630	utr3	middle	3938.5	0.659649
1	9207315	9207353	9207315	+	AT1G26630	utr3	middle	1377.5	0.230714
1	9207353	9207398	9207374	+	AT1G26630	utr3	last	1661.17	0.278224
1	9211481	9211487	9211481	+	AT1G26650	utr3	first	18	0.0600334
1	9211498	9211522	9211505	+	AT1G26650	utr3	middle	89.3333	0.297943
1	9211534	9211553	9211540	+	AT1G26650	utr3	last	210.5	0.702057
1	9213907	9213922	9213914	+	AT1G26660	utr3	first	15.75	0.121543
1	9213951	9213983	9213973	+	AT1G26660	utr3	last	113.833	0.878457
1	9215540	9215574	9215549	+	AT1G26665	utr3	single	486.167	1
1	9217898	9217935	9217924	+	AT1G26670	utr3	first	312.5	0.12731
1	9217935	9217972	9217949	+	AT1G26670	utr3	last	2142.14	0.87269
1	9244768	9244775	9244770	+	AT1G26730	utr3	single	22.6667	1
1	9248143	9248164	9248145	+	AT1G26750	utr3	first	33.3833	0.488179
1	9248177	9248185	9248177	+	AT1G26750	utr3	middle	13.3333	0.194979
1	9248214	9248231	9248218	+	AT1G26750	utr3	middle	10.5	0.153546
1	9248253	9248273	9248261	+	AT1G26750	utr3	last	35	0.511821
1	9261122	9261133	9261125	+	AT1G26770	utr3	first	31.5	0.0367062
1	9261133	9261143	9261140	+	AT1G26770	utr3	middle	32	0.0372888
1	9261156	9261171	9261158	+	AT1G26770	utr3	middle	119.667	0.139445
1	9261171	9261198	9261184	+	AT1G26770	utr3	last	738.5	0.860555
1	9298533	9298553	9298537	+	AT1G26830	utr3	single	66.5	1
1	9322940	9322974	9322959	+	AT1G26910	utr3	first	577	0.591694
1	9322974	9323003	9322989	+	AT1G26910	utr3	middle	398.167	0.408306
1	9323003	9323018	9323003	+	AT1G26910	utr3	last	86	0.0881901
1	9330135	9330170	9330145	+	AT1G26920	utr3	first	22.3333	0.0427105
1	9330299	9330327	9330319	+	AT1G26920	utr3	middle	24.3333	0.0465353
1	9330327	9330360	9330340	+	AT1G26920	utr3	middle	491	0.938994
1	9330381	9330402	9330394	+	AT1G26920	utr3	last	31.9	0.0610059
1	9345138	9345159	9345140	+	AT1G26940	utr3	single	31.1667	1
1	9352751	9352764	9352758	+	AT1G26945	utr3	single	14	1
1	9376568	9376584	9376583	+	AT1G27000	utr3	first	16.5	0.0322035
1	9376615	9376623	9376619	+	AT1G27000	utr3	middle	67	0.130766
1	9376634	9376663	9376645	+	AT1G27000	utr3	middle	126.617	0.247121
1	9376663	9376701	9376680	+	AT1G27000	utr3	middle	385.75	0.752879
1	9376737	9376752	9376737	+	AT1G27000	utr3	last	91.2	0.177998
1	9380514	9380559	9380536	+	AT1G27020	utr3	first	80.3333	0.0296415
1	9380559	9380595	9380581	+	AT1G27020	utr3	middle	284.267	0.104889
1	9380595	9380625	9380609	+	AT1G27020	utr3	middle	1332.5	0.491667
1	9380625	9380655	9380646	+	AT1G27020	utr3	middle	117.5	0.0433553
1	9380655	9380693	9380668	+	AT1G27020	utr3	middle	1377.67	0.508333
1	9380693	9380732	9380717	+	AT1G27020	utr3	last	55.1667	0.0203555
1	9383892	9383916	9383901	+	AT1G27030	utr3	first	43.3	0.694281
1	9383983	9384007	9383994	+	AT1G27030	utr3	middle	19.0667	0.305719
1	9384020	9384034	9384022	+	AT1G27030	utr3	last	16	0.256547
1	9394530	9394550	9394530	+	AT1G27050	utr3	first	31.5	0.229759
1	9394550	9394582	9394569	+	AT1G27050	utr3	middle	105.6	0.770241
1	9394582	9394596	9394582	+	AT1G27050	utr3	last	17.5833	0.128252
1	9424066	9424086	9424066	+	AT1G27120	utr3	single	15.1667	1
1	9426659	9426678	9426661	+	AT1G27130	utr3	first	56	0.0449018
1	9426694	9426717	9426696	+	AT1G27130	utr3	middle	94.4667	0.075745
1	9426717	9426751	9426737	+	AT1G27130	utr3	middle	481.167	0.385808
1	9426751	9426789	9426765	+	AT1G27130	utr3	last	766	0.614192
1	9432217	9432252	9432231	+	AT1G27150	utr3	first	11.6667	0.133588
1	9432252	9432296	9432273	+	AT1G27150	utr3	last	75.6667	0.866412
1	9482783	9482816	9482796	+	AT1G27290	utr3	first	46.9048	0.348549
1	9482830	9482844	9482839	+	AT1G27290	utr3	middle	30	0.22293
1	9482877	9482913	9482900	+	AT1G27290	utr3	last	87.6667	0.651451
1	9484274	9484306	9484288	+	AT1G27300	utr3	first	29.8833	0.470851
1	9484306	9484346	9484323	+	AT1G27300	utr3	middle	33.5833	0.529149
1	9484346	9484377	9484368	+	AT1G27300	utr3_extended	last	23.5571	0.371173
1	9492380	9492390	9492381	+	AT1G27320	utr3	first	45.3333	0.0481842
1	9492428	9492445	9492437	+	AT1G27320	utr3	middle	11	0.0116918
1	9492445	9492456	9492452	+	AT1G27320	utr3	middle	24	0.0255093
1	9492467	9492500	9492479	+	AT1G27320	utr3	middle	258.167	0.274402
1	9492500	9492530	9492521	+	AT1G27320	utr3	middle	284.333	0.302214
1	9492530	9492553	9492541	+	AT1G27320	utr3	middle	78.3333	0.0832595
1	9492553	9492582	9492566	+	AT1G27320	utr3	last	656.5	0.697786
1	9494033	9494063	9494047	+	AT1G27330	utr3	first	1618.5	0.955149
1	9494063	9494087	9494069	+	AT1G27330	utr3	last	76	0.044851
1	9498011	9498033	9498018	+	AT1G27340	utr3	first	666	0.924037
1	9498033	9498054	9498048	+	AT1G27340	utr3	last	54.75	0.0759625
1	9503794	9503832	9503812	+	AT1G27360	utr3	single	27	1
1	9516800	9516830	9516814	+	AT1G27400	utr3	first	217.833	0.0756016
1	9516830	9516860	9516846	+	AT1G27400	utr3	middle	2458.17	0.853135
1	9516860	9516890	9516870	+	AT1G27400	utr3	middle	423.167	0.146865
1	9516890	9516923	9516890	+	AT1G27400	utr3	middle	84.2	0.0292226
1	9516923	9516945	9516939	+	AT1G27400	utr3	last	55.0833	0.0191173
1	9520684	9520728	9520702	+	AT1G27420	utr3	first	63.1667	0.543759
1	9520742	9520751	9520745	+	AT1G27420	utr3_extended	last	53	0.456241
1	9533906	9533944	9533925	+	AT1G27450	utr3	first	68.5333	0.0322839
1	9533944	9533976	9533963	+	AT1G27450	utr3	middle	980	0.461647
1	9533976	9534003	9534000	+	AT1G27450	utr3	middle	37.3	0.0175709
1	9534003	9534030	9534016	+	AT1G27450	utr3	middle	1142.83	0.538353
1	9534030	9534063	9534034	+	AT1G27450	utr3	middle	116.333	0.054801
1	9534063	9534094	9534082	+	AT1G27450	utr3	middle	311	0.146502
1	9534094	9534121	9534106	+	AT1G27450	utr3	last	41	0.0193138
1	9537496	9537506	9537499	+	AT1G27460	utr3	first	19.75	0.341991
1	9537531	9537551	9537538	+	AT1G27460	utr3	middle	34.5	0.597403
1	9537551	9537572	9537560	+	AT1G27460	utr3	last	23.25	0.402597
1	9546179	9546191	9546187	+	AT1G27480	utr3	first	23.5	0.382114
1	9546230	9546253	9546251	+	AT1G27480	utr3	last	38	0.617886
1	9562292	9562311	9562307	+	AT1G27520	utr3	first	50	0.167785
1	9562311	9562344	9562324	+	AT1G27520	utr3	last	248	0.832215
1	9614221	9614245	9614234	+	AT1G27630	utr3	first	11.5	0.289916
1	9614257	9614268	9614259	+	AT1G27630	utr3	middle	19.5	0.491597
1	9614311	9614336	9614334	+	AT1G27630	utr3	last	20.1667	0.508403
1	9616190	9616204	9616195	+	AT1G27650	utr3	first	18	0.0600734
1	9616204	9616225	9616212	+	AT1G27650	utr3	middle	63	0.210257
1	9616278	9616296	9616294	+	AT1G27650	utr3	middle	43.5	0.145177
1	9616308	9616344	9616331	+	AT1G27650	utr3	middle	167.633	0.559462
1	9616344	9616369	9616356	+	AT1G27650	utr3	middle	132	0.440538
1	9616386	9616397	9616388	+	AT1G27650	utr3	last	82	0.273668
1	9634534	9634556	9634553	+	AT1G27680	utr3	single	15.5667	1
1	9638439	9638464	9638450	+	AT1G27690	utr3	first	18.8333	0.184339
1	9638508	9638543	9638529	+	AT1G27690	utr3	last	83.3333	0.815661
1	9640087	9640099	9640091	+	AT1G27695	utr3	first	17.5	0.182927
1	9640114	9640131	9640116	+	AT1G27695	utr3	last	78.1667	0.817073
1	9661890	9661912	9661905	+	AT1G27750	utr3	first	80.1667	0.187378
1	9661923	9661940	9661923	+	AT1G27750	utr3	middle	21	0.0490845
1	9661940	9661963	9661957	+	AT1G27750	utr3	last	347.667	0.812622
1	9671443	9671465	9671443	+	AT1G27760	utr3	first	30.6667	0.0500408
1	9671476	9671489	9671476	+	AT1G27760	utr3	middle	10	0.0163177
1	9671489	9671527	9671502	+	AT1G27760	utr3	middle	318.333	0.519445
1	9671527	9671569	9671551	+	AT1G27760	utr3	middle	294.5	0.480555
1	9671569	9671607	9671587	+	AT1G27760	utr3	middle	109.033	0.177917
1	9671607	9671640	9671611	+	AT1G27760	utr3	middle	56.7	0.0925211
1	9671640	9671671	9671653	+	AT1G27760	utr3	last	59.6667	0.097362
1	9703891	9703920	9703916	+	AT1G27850	utr3	first	43	0.386228
1	9703920	9703955	9703937	+	AT1G27850	utr3	middle	68.3333	0.613772
1	9703955	9703984	9703955	+	AT1G27850	utr3_extended	middle	22.8333	0.20509
1	9703984	9703998	9703995	+	AT1G27850	utr3_extended	last	19.8333	0.178144
1	9713999	9714003	9713999	+	AT1G27880	utr3	single	20	1
1	9742051	9742088	9742076	+	AT1G27950	utr3	first	454.667	0.135934
1	9742101	9742124	9742105	+	AT1G27950	utr3	middle	446.5	0.133493
1	9742124	9742159	9742143	+	AT1G27950	utr3	middle	2743.25	0.820166
1	9742159	9742177	9742159	+	AT1G27950	utr3_extended	last	601.5	0.179834
1	9747970	9748004	9747999	+	AT1G27970	utr3	first	634.833	0.344301
1	9748004	9748044	9748022	+	AT1G27970	utr3	middle	1209	0.655699
1	9748056	9748070	9748057	+	AT1G27970	utr3	middle	54.6667	0.0296484
1	9748070	9748100	9748080	+	AT1G27970	utr3	last	38.0833	0.0206544
1	9752721	9752756	9752746	+	AT1G27980	utr3	first	367.033	0.933848
1	9752768	9752772	9752768	+	AT1G27980	utr3	last	26	0.0661521
1	9768055	9768069	9768067	+	AT1G28010	utr3	single	25.3333	1
1	9782564	9782603	9782584	+	AT1G28060	utr3	first	36	0.0904333
1	9782603	9782630	9782622	+	AT1G28060	utr3	middle	279.75	0.702742
1	9782641	9782672	9782647	+	AT1G28060	utr3	middle	118.333	0.297258
1	9782672	9782719	9782696	+	AT1G28060	utr3	last	65.4524	0.164419
1	9783992	9784036	9784012	+	AT1G28070	utr3	single	16.95	1
1	9798950	9798971	9798956	+	AT1G28090	utr3	single	29	1
1	9803998	9804006	9804001	+	AT1G28100	utr3	first	29.5	0.578431
1	9804423	9804448	9804429	+	AT1G28100	utr3_extended	middle	21.5	0.421569
1	9804459	9804474	9804464	+	AT1G28100	utr3_extended	last	11.5	0.22549
1	9827947	9827968	9827958	+	AT1G28130	utr3	first	76.6667	0.398959
1	9827968	9827997	9827977	+	AT1G28130	utr3	middle	16.3333	0.0849957
1	9828036	9828051	9828041	+	AT1G28130	utr3	middle	15.5	0.0806592
1	9828051	9828072	9828066	+	AT1G28130	utr3	last	115.5	0.601041
1	9875505	9875541	9875522	+	AT1G28250	utr3	first	24.5	0.332956
1	9875541	9875579	9875559	+	AT1G28250	utr3	last	49.0833	0.667044
1	9943507	9943528	9943524	+	AT1G28340	utr3	first	13.3333	0.302572
1	9943543	9943551	9943543	+	AT1G28340	utr3	last	30.7333	0.697428
1	9966213	9966232	9966227	+	AT1G28380	utr3	first	56	0.062787
1	9966232	9966264	9966251	+	AT1G28380	utr3	middle	415.833	0.466231
1	9966264	9966292	9966272	+	AT1G28380	utr3	middle	183	0.205179
1	9966292	9966329	9966307	+	AT1G28380	utr3	last	476.071	0.533769
1	9987698	9987720	9987706	+	AT1G28420	utr3	first	56.5	0.822816
1	9987720	9987736	9987734	+	AT1G28420	utr3	last	12.1667	0.177184
1	10000346	10000370	10000355	+	AT1G28440	utr3	single	128	1
1	10017652	10017654	10017652	+	AT1G28490	coding_exon	CDS	53	0.0605368
1	10017936	10017957	10017949	+	AT1G28490	utr3	first	830.667	0.948791
1	10017973	10017990	10017977	+	AT1G28490	utr3	middle	44.8333	0.0512088
1	10018018	10018034	10018026	+	AT1G28490	utr3	last	26	0.0296973
1	10026105	10026134	10026127	+	AT1G28510	utr3	first	28	0.323699
1	10026280	10026295	10026290	+	AT1G28510	utr3	last	58.5	0.676301
1	10031586	10031611	10031592	+	AT1G28520	utr3	first	55	0.262781
1	10031611	10031648	10031630	+	AT1G28520	utr3	middle	54.5	0.260392
1	10031718	10031729	10031720	+	AT1G28520	utr3	middle	12	0.057334
1	10031748	10031774	10031756	+	AT1G28520	utr3	middle	17	0.0812231
1	10031774	10031796	10031792	+	AT1G28520	utr3	middle	16.5	0.0788342
1	10031854	10031864	10031854	+	AT1G28520	utr3	middle	21	0.100334
1	10031864	10031890	10031873	+	AT1G28520	utr3	middle	37	0.17678
1	10031890	10031925	10031907	+	AT1G28520	utr3	middle	119.5	0.570951
1	10031940	10031975	10031958	+	AT1G28520	utr3	last	89.8	0.429049
1	10036900	10036918	10036903	+	AT1G28540	utr3	single	13.2667	1
1	10079890	10079925	10079912	+	AT1G28680	utr3_extended	first	125.833	0.753117
1	10079925	10079955	10079925	+	AT1G28680	utr3_extended	middle	41.25	0.246883
1	10079991	10080015	10080009	+	AT1G28680	utr3_extended	last	21.5833	0.129177
1	10135355	10135367	10135355	+	AT1G29040	utr3	first	17.5	0.611888
1	10136153	10136170	10136153	+	AT1G29040	utr3_extended	last	11.1	0.388112
1	10149599	10149615	10149602	+	AT1G29060	utr3	first	245.167	0.945981
1	10149721	10149729	10149727	+	AT1G29060	utr3	last	14	0.0540193
1	10151241	10151259	10151245	+	AT1G29070	utr3	first	55	0.0389404
1	10151259	10151288	10151259	+	AT1G29070	utr3	middle	29	0.0205322
[truncated: 33,444 more rows]
