# Supplementary material for: Delineating yeast cleavage and polyadenylation signals using deep learning
Source: HighWire-hosted journal article supplement (doi:10.1101/gr.278606.123), 2024-06-24
Supplement: Supplemental_Table_S9.xlsx [file Supplemental_Table_S9.xlsx]

## Sheet: Legend
Table S9. The motifs showing significant importance scores from the PolyaClassifer model in A. thaliana.
This table contains the motif importance quantification learned from the A.thaliana-specific PolyaClassifier model for 4mers, 5mers, and 6mers.
Description of the columns:
Motif	The sequence for the motif of interest.
Family	The assigned motif family based on the sequence composition of the motif.
Score	The per-site importance score for the motif of interest in the denoted region.
95% confidence interval: Lower bound	The lower bound on the 95% confidence interval around the per-site importance score in the denoted region.
95% confidence interval: Upper bound	The upper bound on the 95% confidence interval around the per-site importance score in the denoted region.
Sum importance profile	The position-specific sum importance score for each motif at the indicated position centered around the cleavage site.

## Sheet: 4mer motif importance
		[-150, -30) region			[-30, -15) region			[-15, -5) region			[-5, 2) region			[2, 15] region			Sum importance profile
Motif	Family	Mean importance score	95% confidence interval: Lower bound	95% confidence interval: Upper bound	Mean importance score	95% confidence interval: Lower bound	95% confidence interval: Upper bound	Mean importance score	95% confidence interval: Lower bound	95% confidence interval: Upper bound	Mean importance score	95% confidence interval: Lower bound	95% confidence interval: Upper bound	Mean importance score	95% confidence interval: Lower bound	95% confidence interval: Upper bound	-250	-249	-248	-247	-246	-245	-244	-243	-242	-241	-240	-239	-238	-237	-236	-235	-234	-233	-232	-231	-230	-229	-228	-227	-226	-225	-224	-223	-222	-221	-220	-219	-218
AAAA	A-rich	-0.00406896	-0.0189075	0.0107695	0.744392	0.679455	0.80933	0.0431497	-0.079089	0.165388	3.10557	2.84006	3.37109	-0.392418	-0.455447	-0.329389	-22.8076	-28.8907	-36.1556	-43.5591	-41.863	-48.0881	-57.3183	-56.7625	-52.7577	-49.6423	-57.7552	-39.6885	-45.243	-45.8902	-47.1883	-48.4237	-48.7513	-37.586	-41.3084	-37.0559	-25.4397	-28.0587	-25.6728	-29.7367	-41.1444	-26.8969	-26.9515	-19.9013	-20.6633	-22.3427	-23.0389	-22.2739	-16.913
AAAC	A-rich	0.165109	0.151791	0.178426	0.61265	0.538468	0.686832	-0.0497272	-0.165623	0.0661683	2.99775	2.49966	3.49585	-0.313643	-0.39289	-0.234397	-5.23622	-8.32133	-10.9028	-9.88655	-14.2072	-9.3696	-16.3855	-16.9846	-15.7486	-18.965	-14.7227	-13.3025	-12.5507	-17.037	-11.2941	-9.5142	-12.4174	-12.0456	-17.7574	-12.7858	-6.37561	-8.43657	-5.69329	0.104479	-9.07576	-6.74576	-7.3462	-6.06011	-1.49838	-6.62969	-6.79524	-4.6566	2.59906
AAAU	A-rich	0.158364	0.142558	0.17417	1.42872	1.37608	1.48136	0.813934	0.72687	0.900998	4.80393	4.52403	5.08383	-0.327318	-0.392409	-0.262227	-19.4791	-25.1537	-18.2665	-29.2671	-30.3292	-34.2601	-41.531	-38.973	-31.4892	-26.4115	-32.1401	-33.259	-34.4716	-25.7903	-20.5987	-34.8232	-36.415	-33.3527	-29.8099	-27.2374	-24.0399	-19.5847	-25.6018	-12.0965	-21.7837	-30.9378	-20.4637	-27.6036	-28.224	-17.8608	-23.2445	-15.0897	-9.72159
AACA	A-rich	0.174149	0.158152	0.190145	0.507428	0.439444	0.575411	-0.00753368	-0.120124	0.105056	2.07641	1.76028	2.39254	-0.248255	-0.332831	-0.163679	-4.69441	-9.93851	-7.39399	-9.03385	-10.7962	-14.9017	-15.231	-21.6586	-15.8698	-12.774	-13.6033	-14.08	-12.0049	-9.47436	-6.52034	-10.5955	-11.1225	-5.34706	-6.98701	-6.30535	-2.71958	-4.22052	-6.49454	-4.67173	-3.72278	-11.7187	-6.94858	-5.08985	-4.55358	0.0189916	-2.79157	-0.481482	-2.32796
ACAA	A-rich	0.101246	0.0866738	0.115817	0.651582	0.57844	0.724724	0.0107426	-0.11364	0.135126	2.85684	2.54236	3.17132	-0.296612	-0.353864	-0.23936	-10.4958	-5.24711	-9.23805	-9.10737	-13.3109	-15.7741	-10.9162	-18.9863	-19.2138	-9.35939	-13.08	-11.6429	-7.73643	-9.02496	-12.5313	-8.85025	-10.9924	-10.6652	-7.82682	-7.08696	-4.6624	-3.99941	-5.45599	-2.19161	-3.6308	-5.5663	-12.4877	-7.42062	-7.73738	-2.65901	11.4665	-0.716565	-0.784553
AGAA	A-rich	0.0802569	0.0689369	0.0915768	0.741711	0.682048	0.801374	0.228932	0.112685	0.345179	3.80533	3.53575	4.07491	-0.380624	-0.441688	-0.31956	-0.212251	9.18003	10.4815	26.2798	19.3271	28.6978	20.3156	18.3511	12.2125	20.5895	31.7831	15.8611	35.6568	24.4565	21.1836	19.618	24.4994	12.8282	33.6843	39.4443	35.6583	44.1504	36.3904	40.0386	39.2658	31.7078	29.4992	27.5847	29.9993	35.0019	38.8791	39.2696	43.5152
AUUU	U-rich	0.462264	0.450494	0.474033	0.850643	0.814844	0.886443	2.36025	2.29017	2.43033	3.52265	3.35132	3.69397	0.487509	0.440363	0.534656	-21.3674	-27.8036	-26.0876	-28.7283	-24.7861	-24.2652	-30.7506	-32.0036	-35.9697	-30.0865	-24.0792	-25.8221	-17.6175	-24.7909	-22.0427	-18.7918	-20.2711	-21.828	-22.0583	-25.6006	-12.5113	-16.9299	-19.5349	-11.3487	-15.7511	-20.0488	-14.3281	-20.2311	-16.1515	-25.0114	-19.0536	-22.0216	-9.58644
CAAA	A-rich	-0.0422251	-0.053719	-0.0307312	0.520344	0.456829	0.583858	-0.204084	-0.31339	-0.0947785	4.28883	3.97526	4.60239	-0.272875	-0.326268	-0.219481	-11.9845	-8.35005	-16.0022	-13.6675	-13.2855	-19.027	-27.6066	-15.8694	-18.4855	-18.9027	-8.73713	-18.49	-19.7022	-11.7188	-13.2825	-16.5139	-9.8378	-14.9564	-14.7479	-8.03103	-6.62796	-11.813	-0.942672	-11.4424	-7.99525	-3.77196	-8.80862	-4.94916	-6.62691	-9.37814	-1.05553	11.085	0.272527
CUUU	U-rich	0.597958	0.587719	0.608197	0.271569	0.223928	0.319211	2.26289	2.18302	2.34276	1.68985	1.58392	1.79578	0.831684	0.806882	0.856487	-14.337	-11.934	-12.418	-12.5069	-4.00099	2.50721	-7.52062	-9.5115	-5.96879	-7.68685	-4.71193	-10.1498	-6.64544	-6.91585	-11.9465	-5.71295	-7.49815	1.05212	2.73295	-0.193208	1.86013	6.85895	4.02498	4.63564	5.60841	3.01965	8.50637	7.15156	5.73053	9.58208	3.58731	3.33907	3.36381
GAAA	A-rich	0.0996241	0.0871225	0.112126	1.18958	1.12246	1.2567	0.301352	0.163835	0.438869	5.18121	4.88187	5.48054	-0.489201	-0.542366	-0.436037	-15.0695	-13.49	-9.5991	-5.44491	-1.07563	-7.42568	-2.07808	-5.7965	-2.44675	-1.88716	-0.641525	8.10296	5.03132	13.2561	1.48642	-1.45145	0.389634	6.33683	2.88741	14.5501	11.3812	12.1847	12.2567	8.48379	14.5619	11.7093	9.91419	5.10197	8.7392	3.99058	11.9101	18.7273	14.5228
GUUU	U-rich	0.715522	0.706372	0.724671	0.375648	0.333911	0.417385	2.60508	2.53082	2.67934	1.3838	1.27745	1.49015	0.734568	0.707901	0.761235	-17.9366	-15.8728	-16.1878	-12.9787	-13.3136	-13.4064	-5.66024	-3.56453	-5.8349	-5.42696	-4.68486	-9.75863	-11.2754	-4.77002	-3.80118	-7.79281	-6.7107	1.43416	5.80742	0.252758	-6.54254	3.21764	4.38359	9.98666	5.36006	3.27546	5.49835	4.01825	3.70127	6.11211	3.86543	3.11148	5.74943
UAUU	U-rich	0.488803	0.47336	0.504247	1.02495	0.984341	1.06556	1.6305	1.55931	1.70169	3.83493	3.67262	3.99724	0.121056	0.0826497	0.159462	-15.8288	-20.468	-28.492	-18.7479	-28.6531	-35.4961	-26.9707	-25.814	-25.2798	-10.9793	-25.1446	-19.8211	-17.4944	-16.8389	-18.7093	-19.3309	-20.0956	-16.5818	-18.4225	-23.2434	-15.0221	-25.0726	-20.5194	-13.8289	-30.173	-13.2176	-19.8379	-20.5669	-24.3281	-8.72942	-22.0231	-14.8202	-13.117
UCUU	U-rich	0.601958	0.592456	0.611459	0.288753	0.245676	0.33183	1.81942	1.74716	1.89168	1.73745	1.66199	1.81291	1.01536	0.989378	1.04133	-9.6675	-7.63776	-10.1047	-7.69316	-4.97273	-4.33569	-3.01913	-6.1835	-3.15196	1.78668	-7.08624	-8.00066	-1.81096	-4.0867	-3.75244	-5.77592	3.80341	-0.379601	4.98008	4.29588	9.09142	7.98445	8.121	14.6851	10.1441	17.8658	15.457	15.702	16.0822	10.882	14.064	13.306	9.51427
UGUA	UGUA-containing	1.54974	1.52928	1.5702	0.525848	0.462028	0.589668	-0.613599	-0.716729	-0.51047	3.48917	3.21507	3.76327	-0.24105	-0.300906	-0.181195	-7.2195	-5.73505	-8.45301	-10.0031	-16.6661	-11.4362	-14.6534	-6.85816	-8.52408	-3.24173	-6.37089	2.26699	-3.52319	-4.22156	-3.53469	-9.23523	-4.3342	-3.4423	-6.20619	-6.74133	-6.66595	-13.5741	-9.79757	-10.4897	-7.61201	-12.4373	-5.47185	-10.2443	-1.19351	-3.69275	-6.31009	-3.60707	-5.51712
UGUU	U-rich	0.907856	0.898139	0.917572	0.539554	0.495728	0.58338	2.12087	2.05197	2.18976	1.49744	1.41157	1.58332	0.820241	0.792104	0.848377	-9.94858	-11.735	-9.98514	-13.5213	-14.0397	-3.05218	4.86349	-2.38658	3.23879	5.23688	-6.36774	-2.61482	-2.98269	-3.40364	-1.91892	1.71524	1.16954	6.48846	3.03238	0.919711	2.51884	3.08224	8.67959	13.0047	10.7589	8.1088	9.55582	2.26746	8.5055	11.0942	5.41829	4.65197	5.83042
UUAU	U-rich	0.438419	0.425924	0.450913	1.23221	1.19358	1.27083	1.56952	1.49852	1.64053	3.25937	3.13238	3.38636	0.16804	0.135764	0.200316	-15.0348	-18.5057	-19.4216	-20.2856	-36.5985	-25.1663	-38.4037	-29.0937	-22.7918	-26.6368	-18.559	-16.8548	-22.6168	-22.2601	-31.439	-25.4324	-25.0806	-24.6293	-24.8952	-13.5478	-24.73	-14.873	-24.3403	-32.2794	-15.7834	-16.3727	-13.3722	-15.8653	-10.4315	-20.8411	-15.6787	-16.5073	-15.4458
UUCU	U-rich	0.579255	0.570119	0.588391	0.327738	0.283447	0.372028	2.03532	1.95991	2.11073	1.73851	1.66987	1.80714	1.09642	1.06481	1.12803	-8.32587	-5.76853	-10.6262	-10.3488	-1.7325	-7.21867	3.53987	-5.9285	5.14261	-7.53577	-5.1935	1.32339	-8.2358	-4.95171	-0.591871	-2.34351	4.84433	4.60766	2.92093	3.51758	3.041	11.5564	17.3926	14.6369	18.5041	12.9178	15.9056	19.2824	14.4054	13.3145	16.8123	18.5958	13.6002
UUGU	U-rich	1.17067	1.15841	1.18292	0.365971	0.317855	0.414088	1.85261	1.78317	1.92205	1.48675	1.39634	1.57715	0.862771	0.827445	0.898097	-6.61546	-15.6895	-10.8651	-18.6442	-9.11992	-6.91906	-4.34564	-2.24847	0.306505	-4.56762	-0.558148	-3.81995	-3.75512	-3.91188	-4.02415	-4.8612	2.12279	-0.688669	-2.25829	-2.67817	-2.42192	-1.85895	4.57116	5.56976	7.90383	13.0387	3.11537	4.32136	1.50744	5.9589	0.952707	2.84029	4.93063
UUUA	U-rich	0.303411	0.292846	0.313976	1.06533	1.02187	1.1088	1.87376	1.78301	1.96451	2.85661	2.7375	2.97572	0.33199	0.29994	0.364039	-21.9044	-23.5359	-29.9043	-31.6321	-31.2048	-21.8617	-25.0765	-34.9726	-32.7016	-26.0732	-28.5797	-20.2644	-29.5298	-27.024	-22.1907	-35.3622	-24.0251	-27.2595	-14.6019	-23.5415	-20.9866	-22.1899	-14.1869	-12.7747	-18.1594	-20.3475	-13.1563	-18.0929	-16.3892	-16.2322	-16.1744	-13.1274	-18.7501
UUUC	U-rich	0.475905	0.466938	0.484872	0.232585	0.18822	0.27695	2.48092	2.38897	2.57286	1.73661	1.65322	1.82	0.995258	0.965241	1.02528	-5.03443	-7.00043	-6.58527	-5.78579	-9.33077	-3.78885	-4.51904	-4.79052	-4.24908	-9.06835	-4.32328	-10.9823	-8.10365	-11.1968	-1.76225	-4.23338	-0.649312	-5.17673	-3.27092	1.17586	-0.229959	3.02089	1.90276	6.16897	7.24971	5.61512	3.60006	6.94165	2.38552	8.59789	3.44406	3.22589	4.38792
UUUG	U-rich	0.862192	0.852172	0.872212	0.514431	0.477881	0.55098	2.59094	2.51611	2.66577	1.95026	1.83856	2.06196	0.844514	0.813669	0.875359	-0.404208	-5.1952	-17.4964	-12.6983	-2.99491	5.3354	2.60766	0.315612	-0.177131	-4.19773	-4.37008	0.178419	-6.85489	-2.84003	-2.46306	-1.1983	-0.148032	-2.58764	-1.67873	3.75811	-0.169832	4.16178	4.31404	12.166	12.6425	9.7494	11.0133	2.25516	6.38166	1.94664	8.74031	5.30226	4.90808
UUUU	U-rich	0.672076	0.663543	0.680608	0.552148	0.51331	0.590985	2.78668	2.72625	2.84712	1.53472	1.46876	1.60068	0.786088	0.76422	0.807956	-24.6212	-42.6019	-44.5399	-35.8121	-28.652	-38.9891	-36.9048	-38.9936	-35.911	-31.8727	-37.6011	-27.3783	-34.3418	-30.8079	-30.0705	-24.5493	-28.7758	-20.9271	-18.4403	-24.7606	-20.9837	-14.1387	-4.59101	-9.33696	-6.4729	1.83974	-15.9208	-1.06952	-2.01805	-2.42584	-3.05557	-3.01808	-13.0534
[truncated: 468 more columns]

## Sheet: 5mer motif importance
		[-150, -30) region			[-30, -15) region			[-15, -5) region			[-5, 2) region			[2, 15] region			Sum importance profile
Motif	Family	Mean importance score	95% confidence interval: Lower bound	95% confidence interval: Upper bound	Mean importance score	95% confidence interval: Lower bound	95% confidence interval: Upper bound	Mean importance score	95% confidence interval: Lower bound	95% confidence interval: Upper bound	Mean importance score	95% confidence interval: Lower bound	95% confidence interval: Upper bound	Mean importance score	95% confidence interval: Lower bound	95% confidence interval: Upper bound	-250	-249	-248	-247	-246	-245	-244	-243	-242	-241	-240	-239	-238	-237	-236	-235	-234	-233	-232	-231	-230	-229	-228	-227	-226	-225	-224	-223	-222	-221	-220	-219	-218
AAAAA	A-rich	-0.0715088	-0.102874	-0.0401437	0.503387	0.400611	0.606162	-0.0375305	-0.255057	0.179996	2.34484	1.95146	2.73822	-0.367144	-0.481903	-0.252386	-6.30792	-11.0772	-19.7021	-25.0441	-11.0212	-22.71	-27.1712	-26.9525	-11.2229	-20.8641	-24.8131	-19.1172	-20.9053	-26.5138	-19.6932	-21.003	-11.9282	-15.5237	-23.1604	-13.4949	-16.7866	-13.4381	-12.6873	-16.4984	-20.4758	-10.9324	-6.67518	-10.0427	-11.9569	-11.7259	-11.4033	-13.0239	-11.3929
AAAAC	A-rich	0.136381	0.108096	0.164665	0.738188	0.582444	0.893931	-0.372652	-0.639152	-0.106151	3.51394	2.8322	4.19568	-0.455005	-0.577752	-0.332259	-4.80019	-6.24517	-5.13066	-5.4278	-3.61694	-4.61237	-7.95545	-9.76611	-16.7499	-9.29971	-9.25706	1.03071	-10.4114	-6.1272	-2.46386	-7.14791	-7.90801	-4.54851	-5.99461	-7.1589	-1.36018	-3.65699	-2.44756	-6.43427	-3.34679	-5.47455	-2.73793	-2.60499	-2.45258	-3.63165	-3.36333	-1.83816	-2.04859
AAAAG	A-rich	-0.0124016	-0.0400784	0.0152751	1.13251	0.955292	1.30972	0.302869	0.00663582	0.599103	3.83289	3.00639	4.65938	-0.199271	-0.365673	-0.0328679	1.6968	-1.66025	-1.08274	-2.0621	-5.78957	-0.851977	-6.95469	-5.92076	-7.30697	-9.07483	-7.87229	-2.21196	-5.76187	-3.62238	-7.57279	-2.56195	-6.13831	-3.10591	-1.31726	1.50052	2.08558	1.42924	0.451849	2.23016	-1.12303	1.63457	0.0164719	-1.4508	3.39518	4.59872	-0.395722	-0.783451	2.5787
AAAAU	A-rich	0.119519	0.0866902	0.152347	1.14241	1.02948	1.25534	0.751412	0.54941	0.953413	3.71287	3.26963	4.15612	-0.403668	-0.514894	-0.292442	-9.43654	-5.45129	-11.1556	-11.7828	-16.8756	-21.1668	-15.8495	-10.5493	-11.9763	-10.0016	-12.2461	-20.9134	-7.0721	-9.18903	-13.236	-15.9576	-14.7013	-13.9669	-9.00893	-14.946	-9.75891	-8.25661	-5.01799	-8.02426	-18.0479	-11.004	-17.3717	-6.27334	-7.04228	-9.76704	-4.55836	-5.92542	-6.58499
AAACA	A-rich	0.198092	0.171651	0.224533	0.899918	0.760289	1.03955	-0.0112701	-0.287243	0.264703	3.33997	2.60367	4.07627	-0.409124	-0.566351	-0.251897	-3.91532	-3.06815	-4.78154	-3.20411	-8.9646	-5.63368	-11.1953	-5.86166	-5.96186	-11.3539	-6.06179	-9.24521	-6.26483	-5.30166	-4.93375	-7.17578	-3.94174	-4.48005	-7.46868	-4.6467	-1.73049	-3.48697	-2.59809	-2.39264	-7.23897	-2.21395	-4.15419	-2.74469	1.97057	-1.00656	-1.32684	-2.79454	4.86802
AAAGA	A-rich	0.0587745	0.0343611	0.0831879	1.36386	1.2206	1.50711	0.826862	0.4654	1.18832	4.80888	4.18544	5.43231	-0.382357	-0.532532	-0.232182	1.32621	0.993999	-3.39912	-1.70609	-3.89023	-2.10923	-8.56994	-4.63961	-6.95955	-4.69818	-4.89665	-6.65534	-3.70372	-2.75736	3.75496	-4.40145	-1.62041	-0.085661	-5.76508	0.512624	6.53524	7.78954	3.68007	2.51523	6.47574	0.097942	2.34108	1.25688	1.39038	4.04464	0.864715	1.67337	4.73527
AACAA	A-rich	0.184954	0.155249	0.214659	0.907627	0.772157	1.0431	0.13072	-0.0858631	0.347303	2.23176	1.74063	2.72289	-0.39471	-0.538267	-0.251153	-1.55651	-4.71961	-3.32965	-6.08865	-7.09274	-7.60168	-10.5187	-11.1066	-4.40276	-9.39966	-8.19939	-8.36735	-6.51494	-7.86811	-3.56149	-6.98147	-5.44104	-5.85438	-3.15679	-1.51729	-1.35945	-6.28982	-1.09421	-1.4652	-2.76191	-4.46133	-4.13909	-4.13544	-1.60431	4.7372	-1.22435	0.370347	-1.37225
AAGAA	A-rich	0.0984684	0.0761272	0.120809	1.28334	1.17395	1.39274	0.716975	0.461561	0.97239	3.32442	2.98844	3.66041	-0.197707	-0.336549	-0.0588657	2.36862	4.80061	11.7459	5.84924	13.0694	14.8262	8.38018	-1.42905	4.99378	14.6248	3.11958	18.7357	13.5621	8.34677	12.5059	11.0219	9.11724	14.3104	24.0632	15.7111	27.3882	18.7245	24.67	21.5842	17.433	21.9959	12.4394	16.5499	23.331	17.4567	21.6672	22.9443	16.9472
AAUAA	A-rich	0.156215	0.117959	0.194471	2.77612	2.68387	2.86836	0.591081	0.296484	0.885678	3.91179	3.46453	4.35905	-0.502832	-0.67948	-0.326183	-6.05029	-7.4494	-9.74138	-5.99769	-6.54524	-10.9635	-7.53814	-12.6051	-12.2304	-12.1608	-5.94798	-6.35973	-5.32547	-10.8534	-17.9383	-7.56146	-8.31688	-7.76841	-5.19423	-4.44613	-6.972	-6.95826	-9.38273	-7.85158	-3.28221	-6.63506	-7.96242	-9.75337	-9.9206	-6.83715	-8.7088	-12.2948	-3.96833
AAUUU	U-rich	0.486767	0.458249	0.515286	1.31436	1.24235	1.38638	2.53012	2.38635	2.67389	4.88931	4.52813	5.25048	0.22591	0.130572	0.321247	-8.35155	-5.66771	-13.9688	-5.8302	-4.38415	-11.073	-15.6608	-8.3615	-11.787	-8.48475	-4.65468	-7.66679	-6.68163	-10.9037	-5.53022	-4.48699	-5.08061	-7.03447	-9.34272	-6.27657	-4.79495	-8.65419	-2.80807	-5.53141	-3.98563	-9.49628	-4.75008	-5.696	-5.81118	-8.08141	-6.9715	-5.24858	-2.82011
ACAAA	A-rich	0.0948559	0.0653556	0.124356	0.613833	0.4677	0.759967	-0.169699	-0.440133	0.100734	3.40281	2.91668	3.88895	-0.467019	-0.59008	-0.343959	-0.843982	-3.93187	-5.0282	-6.5936	-7.86635	-11.6662	-4.9461	-11.1273	-12.5897	-3.81497	-10.4415	-6.48822	-6.99549	-3.85816	-4.19849	-1.9205	-6.13669	-8.87959	-7.36746	-2.9335	-3.6214	-2.03694	-5.68802	-3.32375	-2.74377	-4.52966	-4.21428	-4.88018	-4.98664	-2.51983	5.03554	-2.66485	-2.02042
AGAAA	A-rich	0.0915368	0.0676145	0.115459	0.937554	0.817365	1.05774	0.00646757	-0.25881	0.271746	4.2696	3.92824	4.61097	-0.356833	-0.457163	-0.256504	-5.01511	-5.38623	-2.95782	-1.7047	-4.20562	-0.923603	-0.593783	-4.88642	-4.60516	-1.4257	1.64546	-1.62736	0.789651	-0.422078	-0.986703	-3.28643	3.55789	-2.11729	5.88129	5.68497	5.06233	6.17325	7.20973	8.51711	6.93283	5.42659	-0.0451257	0.930688	-2.37709	3.73033	7.18376	8.13267	6.83972
AGAAG	A-rich	0.078107	0.0499987	0.106215	0.654384	0.49524	0.813527	0.43392	0.163011	0.70483	3.35386	2.6841	4.02361	-0.287402	-0.431754	-0.14305	21.3394	28.9802	24.9151	43.0071	34.5243	33.7013	32.6433	33.3955	25.1006	31.8307	39.7789	28.134	39.2788	30.3287	24.1189	26.1728	28.1481	18.9836	37.2307	40.7346	28.1929	36.2052	28.9688	33.7344	34.3397	27.5699	29.6951	30.1715	31.0696	35.0948	28.4739	32.0447	33.6707
AGUUU	U-rich	0.536	0.516541	0.55546	0.511276	0.431339	0.591213	2.80458	2.64583	2.96332	2.76069	2.47377	3.04761	0.610925	0.533092	0.688759	-5.14389	-6.48749	-4.97722	-7.0325	-6.03709	-1.0451	-4.03452	-5.3897	-2.59012	-5.13663	-6.64096	-3.92948	-2.85804	-1.97633	-0.8171	-4.23869	-2.84658	-5.67272	-2.10588	-6.19593	-3.97959	0.769336	-1.75411	-0.215604	-1.29431	0.459577	-0.513312	-0.461649	-0.0391288	-0.625898	-2.98221	-1.83738	-0.929848
AUAAA	A-rich	0.145292	0.10964	0.180943	2.70799	2.60681	2.80918	0.671551	0.367068	0.976033	4.13825	3.72293	4.55358	-0.289108	-0.454294	-0.123922	-5.90331	-4.99781	-2.88123	-10.728	-8.12474	-6.76784	-7.80434	-6.68415	-7.72521	-9.63646	-9.90849	-8.78085	-10.7622	-6.60516	-11.1797	-18.5007	-9.55943	-6.81997	-8.0347	-3.21658	-7.42287	-5.47414	-13.4169	-7.08841	-8.99529	-2.90783	-4.5463	-8.36473	-6.6869	-5.59837	-7.71411	-5.5651	-4.16779
AUGAA	A-rich	0.269121	0.242518	0.295724	2.53393	2.43853	2.62932	0.600365	0.354793	0.845937	3.13845	2.60134	3.67556	-0.141965	-0.293042	0.00911104	2.44922	6.33183	3.99135	-1.08657	-0.877391	1.44865	1.45557	-2.36378	-2.01863	0.146015	-0.934404	4.01843	2.20786	-1.41029	0.339923	3.27743	2.45827	5.1902	2.70962	5.236	10.0825	1.5676	1.251	5.18433	4.87129	3.40857	0.784088	0.297376	1.19664	4.26562	5.13362	3.88594	4.29413
AUGUA	UGUA-containing	1.57276	1.52881	1.61671	0.858767	0.752412	0.965123	-0.946818	-1.19183	-0.701807	2.88961	2.40892	3.37029	-0.517288	-0.651735	-0.382841	-1.26644	-1.61148	-6.1097	-4.7972	-4.32062	-5.98646	-2.19599	-5.03639	-2.12045	-4.12291	-0.136683	-3.68546	-4.62776	-4.05918	-3.57223	-2.78181	-1.86461	-2.40274	-4.82112	-4.8677	-6.71833	-3.06401	-3.95522	-5.12204	-4.19719	-4.50881	-5.15363	-3.15234	-2.96035	-5.52551	-1.9297	-2.28068	-2.54808
AUUUC	U-rich	0.308234	0.287079	0.32939	0.621228	0.537211	0.705245	2.56734	2.39882	2.73586	4.00872	3.65949	4.35795	0.762772	0.665636	0.859908	-2.10623	-3.26686	-4.01305	-1.82249	-5.37049	-0.859076	-2.91184	-3.15423	-9.6496	-3.06631	-2.58798	-5.42511	-2.94017	-4.98307	-3.23226	-3.01634	-2.90742	-3.02015	-2.79285	-3.19223	-1.35686	-1.92558	-4.80302	-0.948347	-0.921019	-1.26754	-2.27547	-1.2144	-1.28576	-6.36116	-3.35506	-3.67368	-1.53358
AUUUG	U-rich	0.774745	0.749026	0.800465	0.904397	0.836426	0.972367	2.624	2.47666	2.77134	4.76278	4.36933	5.15624	0.649804	0.53612	0.763489	-1.40667	-7.43428	-4.36849	-4.61931	-0.167022	-6.48585	-5.59936	-6.97883	-6.33965	-6.15535	-1.91111	-5.64102	-3.17971	-3.77561	-0.77745	-2.26526	-2.54893	-4.23988	-2.78354	-4.28624	-0.111585	-3.89542	-1.23874	-1.17714	-4.77703	-1.94336	-3.29078	-3.00668	-3.50501	-2.45423	-3.46266	-4.87193	-1.34491
AUUUU	U-rich	0.650107	0.62858	0.671634	0.859835	0.789763	0.929906	3.03959	2.92426	3.15493	3.68875	3.44467	3.93284	0.619256	0.546787	0.691725	-8.49732	-19.1792	-5.86534	-9.40145	-10.9708	-9.53395	-13.8993	-14.8556	-6.55312	-6.32462	-11.5384	-7.99692	-7.64608	-6.79094	-9.41753	-7.76008	-7.70426	-7.8312	-12.1055	-12.8174	-7.06781	-3.55493	-8.61193	-3.14349	-3.41341	-13.5463	-3.50741	-6.75344	-4.04928	-7.08829	-6.15614	-7.57909	-3.35347
CAAAA	A-rich	-0.0579595	-0.0826625	-0.0332564	0.32693	0.19401	0.459849	-0.432422	-0.723757	-0.141088	4.03397	3.5338	4.53414	-0.231734	-0.335677	-0.127792	-7.17738	-9.81669	-8.26153	-4.46669	-12.4236	-9.87814	-11.976	-5.57989	-14.5214	-12.5718	-5.13395	-12.3637	-8.78433	-8.12103	-7.32966	-7.3465	-7.43619	-10.5395	-5.24957	-4.26497	-0.549701	-4.94439	-2.60953	-7.6636	-2.47538	-3.18922	-6.69203	0.146708	-2.30332	-3.71051	-3.49351	-0.531767	0.0627125
CAUUU	U-rich	0.468151	0.44336	0.492941	0.53129	0.436975	0.625606	2.35079	2.19045	2.51113	4.44094	4.114	4.76788	0.617155	0.553368	0.680942	-5.17617	-6.85532	-1.91644	-4.50814	-3.26775	-3.15486	-3.68206	-10.2663	-4.56276	-3.08704	-2.93221	-2.67733	-6.57284	-4.86644	-3.0427	-2.61383	-1.81626	-3.46065	-5.21194	-0.522575	-5.80272	-1.98539	-1.41582	-2.38096	-0.632853	-1.52331	-2.65075	-4.82432	-5.95922	-4.98237	-0.639347	1.15357	-2.70509
CUUCU	U-rich	0.515216	0.496418	0.534014	0.0432441	-0.0739379	0.160426	1.74887	1.60037	1.89737	2.02837	1.88838	2.16837	1.17484	1.1183	1.23137	-1.94233	-1.62908	1.36115	3.12453	2.34712	6.76709	-0.0492097	4.50406	5.30442	6.01908	5.57393	4.0341	1.55502	3.40878	2.48086	5.16878	4.11471	9.14164	5.92262	3.62227	9.00707	11.067	8.76183	5.27206	10.3339	7.69038	13.2208	6.78687	10.1575	10.7262	8.53458	11.0331	5.40932
CUUGU	U-rich	1.23116	1.20439	1.25792	0.339991	0.190483	0.4895	1.99806	1.84247	2.15365	1.44387	1.28775	1.59999	0.908986	0.847021	0.970951	-3.97443	-1.34558	-0.812733	-0.725587	2.48484	0.616746	-0.082046	1.97569	0.077981	2.55204	2.28195	2.04027	1.49671	2.13326	0.522304	-0.956225	0.218779	2.53954	0.65444	3.05139	6.31591	5.71409	5.17572	1.5989	2.14936	2.94796	3.2862	1.39456	2.32753	5.09578	2.39732	4.07067	2.32685
CUUUG	U-rich	0.943143	0.919131	0.967155	0.240599	0.142697	0.338502	2.54606	2.38478	2.70733	1.9871	1.64571	2.32848	0.908251	0.848998	0.967503	-0.512481	-0.011198	0.686051	1.25969	5.30906	8.71391	2.38269	2.60474	4.24398	2.63865	1.40458	1.46055	4.34448	3.53251	-0.36547	3.47984	-0.277912	1.79881	2.5584	3.38827	4.09319	3.47177	5.33974	7.9523	4.45516	4.99517	10.7367	3.65724	4.06453	6.7807	4.166	4.84794	7.25008
CUUUU	U-rich	0.741768	0.72355	0.759987	0.441073	0.346205	0.535941	2.95889	2.82175	3.09603	2.25724	2.09402	2.42047	0.983921	0.942763	1.02508	-8.60372	-6.51038	-6.84171	-2.84128	-3.987	-2.53597	0.978982	-4.21997	-5.7036	-7.58972	-3.07899	-2.48007	-3.20416	-3.42835	-5.91641	-3.14819	-2.90795	-0.134107	-1.93164	1.64972	-0.549393	3.00424	3.62417	2.40691	7.92648	2.70553	0.599345	4.84393	3.01403	3.76841	3.49788	1.80257	0.452259
GAAAA	A-rich	-0.015714	-0.0431407	0.0117126	0.837018	0.710072	0.963964	0.117111	-0.179732	0.413954	5.13152	4.71982	5.54323	-0.554056	-0.662907	-0.445206	-8.1668	-7.07167	-7.13298	-4.44098	-5.17	-5.04823	-6.04981	-3.3539	-4.03727	-4.57145	-2.79835	-2.03708	-2.59375	-0.576864	-4.17377	-2.59718	-4.00916	-0.304522	0.184676	3.58773	-0.0941898	2.76713	-1.85892	0.487844	3.76186	5.25103	0.562372	-0.519195	4.67554	0.440412	2.22123	2.68368	4.52143
GAAGA	A-rich	0.0348645	0.0106261	0.0591028	0.946277	0.806208	1.08635	0.236082	-0.144718	0.616882	3.21103	2.57579	3.84627	-0.385929	-0.504442	-0.267416	13.533	23.9736	29.024	35.5837	48.1713	38.4488	32.4394	46.0359	42.8491	24.8572	36.6812	42.3215	34.938	42.9511	33.6333	20.7908	34.0393	45.6341	29.2881	46.2703	45.0608	47.2163	41.4159	25.6554	41.1451	31.2936	39.5835	42.1862	32.1792	32.1052	41.7249	35.7765	36.4941
GAUUU	U-rich	0.535785	0.515078	0.556493	0.797585	0.726991	0.86818	2.65632	2.51487	2.79777	3.28502	2.94323	3.62682	0.372355	0.313061	0.431649	-5.74181	-6.82042	-5.43883	-4.61115	-1.37373	-4.27423	0.327157	-3.23285	-3.10572	-2.90136	-5.17201	-1.31097	-3.27276	0.616964	-1.47753	-2.81564	-4.58767	-1.56286	-1.6436	3.09028	1.22355	-1.9754	1.85444	-0.938123	-1.10885	-0.557604	-2.02375	-0.299936	-1.79709	-0.728013	-2.2268	-0.172943	-3.88644
GGUUU	U-rich	0.704025	0.685072	0.722977	0.577449	0.494765	0.660132	2.95072	2.79746	3.10399	2.17405	1.93817	2.40994	0.826422	0.757424	0.895419	-3.47537	-2.79471	-2.94264	1.71763	-2.17858	5.42194	3.47367	1.77134	3.16394	0.436963	2.54368	2.27045	3.39787	1.93346	1.55398	-1.07924	10.1854	8.98858	5.58574	5.03677	4.17642	4.61424	10.4679	4.07263	2.40482	2.77095	7.49914	4.95525	6.95851	5.85682	8.0608	2.01913	1.89108
GUGUU	U-rich	1.04866	1.02462	1.0727	0.410849	0.300838	0.520859	2.50541	2.34847	2.66234	2.35771	2.14286	2.57255	0.980612	0.906184	1.05504	-0.836198	0.348068	-0.881194	-0.764841	0.153795	3.3746	4.53668	0.842219	3.6036	5.43287	0.428015	4.07134	1.3772	0.287495	1.37269	3.01765	4.56121	3.59276	3.8669	7.97111	2.98614	3.81147	2.86881	4.09276	4.05398	3.34991	2.68854	4.41711	3.01839	0.69411	2.15241	1.60886	0.362831
GUUAU	U-rich	0.677314	0.648861	0.705766	1.20255	1.11825	1.28686	1.88118	1.71885	2.0435	5.20826	4.90722	5.5093	0.383432	0.316695	0.450169	-3.72387	-2.81775	-3.08907	-7.5055	-3.00983	-10.7869	-3.64477	-2.28511	-2.81005	-2.18699	-4.83059	-2.96408	-3.36856	-5.32463	-2.86267	-3.46144	-0.484623	-4.90202	-2.35363	-1.54092	-3.75204	-1.01454	-8.95242	-2.72509	-2.85627	-1.09813	-4.72933	-1.97288	-3.58591	-1.77994	-1.25902	-2.60075	-2.72643
GUUGU	U-rich	1.30006	1.27188	1.32824	0.188033	0.0650348	0.31103	2.18693	2.01859	2.35526	1.02386	0.809485	1.23823	0.765394	0.687925	0.842863	-2.43477	-0.869803	-1.47195	1.36273	-2.16621	0.865737	6.30009	4.49067	3.3084	2.19991	4.84473	1.06225	1.66787	-0.115808	1.97016	4.34992	3.8531	2.61318	1.10991	3.80378	1.5753	0.303304	3.44351	6.9261	5.48391	1.6371	0.963402	5.41293	2.81822	0.213433	4.22115	1.52297	0.00831875
GUUUA	U-rich	0.443265	0.421579	0.46495	0.989277	0.881791	1.09676	2.2384	2.03426	2.44254	4.25453	4.00557	4.5035	0.388534	0.317605	0.459462	-7.5747	-5.64024	-6.81687	-7.99119	-8.51934	-5.56939	-6.79975	-6.60038	-8.06721	-4.61266	-5.54901	-9.76081	-4.58372	-4.22745	-6.38586	-3.8914	-8.13431	-2.23192	-5.27769	-3.81728	-7.15894	-5.10075	-0.837177	-4.36679	-2.41137	-2.28182	-1.37134	-3.15849	-2.34763	-2.18968	-2.25334	-6.03874	-1.95326
GUUUC	U-rich	0.718373	0.700569	0.736177	0.196421	0.102462	0.290381	2.92453	2.73954	3.10952	1.49742	1.29741	1.69742	1.02272	0.963268	1.08217	-1.06459	0.210404	-0.0389347	-1.05893	2.39146	0.699165	5.85412	5.06644	3.26047	1.17992	2.17207	0.43156	-2.61508	1.43681	2.94886	2.88612	1.4856	1.7923	3.28095	3.45786	1.6473	2.59411	5.22632	5.44374	2.59537	4.71941	4.00769	1.80053	4.93004	4.1335	4.22327	4.18861	3.31264
GUUUG	U-rich	0.952287	0.931306	0.973268	0.316927	0.233969	0.399884	2.91215	2.7593	3.065	0.439179	0.198149	0.680209	0.783202	0.723273	0.843132	-0.848985	-2.08279	0.191817	2.84768	1.7188	1.16818	2.15965	4.95731	4.40758	2.6274	4.14372	2.47413	4.72254	3.1548	4.30051	2.95298	3.04924	4.50475	7.58877	3.9744	1.17959	6.95239	4.7482	7.71484	7.06642	5.28418	3.1491	6.54037	0.80078	5.14927	3.61316	4.57298	3.6088
GUUUU	U-rich	0.889348	0.872306	0.906389	0.453099	0.367171	0.539028	3.07676	2.95578	3.19774	2.01508	1.84273	2.18742	0.917457	0.8724	0.962514	-8.40919	-9.32146	-5.64006	-5.46121	-5.79559	-6.60118	-6.89084	-3.5033	0.105101	-1.64895	-0.0512303	-4.58472	-5.07004	-2.40557	-2.68031	-5.35046	-1.72047	0.115659	0.392741	-0.900966	1.3694	2.50258	3.59112	3.4685	0.184485	-5.07048	3.07368	3.88708	1.04328	0.760631	2.85049	-0.853044	-1.25969
UAUAU	U-rich	0.565194	0.53419	0.596198	1.82557	1.7545	1.89664	0.72197	0.582826	0.861114	4.60525	4.34052	4.86998	-0.110782	-0.201908	-0.0196548	-6.1978	-11.2313	-16.0715	-9.00642	-4.51849	-9.01633	-17.9042	-9.86058	-10.0116	-8.4962	-10.1581	-7.30442	-9.2279	-7.96348	-11.789	-8.74761	-8.20244	-9.21752	-14.2301	-5.21283	-5.95709	-9.86003	-9.14188	-8.36315	-14.0924	-4.44976	-12.2003	-7.46227	-6.78366	-2.80745	-10.9958	-6.80164	-5.41141
UAUUU	U-rich	0.589662	0.563761	0.615564	0.932596	0.858594	1.0066	2.38996	2.25859	2.52133	4.62443	4.38554	4.86332	0.22468	0.169568	0.279792	-8.10534	-5.6198	-7.10466	-8.31372	-15.6269	-9.90927	-17.5511	-11.8336	-9.10728	-6.83816	-10.3384	-6.55651	-5.07661	-5.15407	-8.50967	-7.99319	-8.02966	-7.96231	-9.18754	-6.72507	-5.65493	-4.59589	-7.91424	-5.48077	-14.8625	-2.44489	-7.063	-6.04839	-10.2411	-4.78623	-9.05287	-3.41021	-7.30782
UCAUU	U-rich	0.435299	0.408859	0.46174	0.63037	0.534608	0.726133	1.65347	1.50966	1.79728	4.52905	4.24101	4.8171	0.704507	0.639761	0.769252	-4.45664	-4.16928	-7.09341	-6.20289	-3.59059	-8.64619	-10.6248	-5.3082	-6.28305	-2.64274	-3.81898	-7.59563	-6.11076	-4.21575	-3.13786	-7.32041	-4.82346	-1.98062	-0.815964	-5.99499	-7.64087	-2.80091	-2.07434	-4.31291	-3.60576	-0.633968	-0.563667	-3.23544	-2.06049	-0.576516	-0.527167	-2.91016	-1.8002
UCUCU	U-rich	0.776722	0.75921	0.794235	-0.00249151	-0.10028	0.0952967	1.32411	1.1965	1.45172	2.2454	2.13011	2.3607	1.32365	1.26711	1.3802	-1.56121	-0.561424	0.164473	-1.79508	1.30808	2.57864	-0.769828	2.95862	0.0943999	1.87582	1.41444	0.103034	-0.241113	-2.72535	2.61593	-1.75821	0.997146	2.39746	5.89218	5.87704	6.6371	5.88404	5.43326	5.04725	6.78984	9.01455	8.46823	6.68062	8.59725	5.01765	10.003	6.97247	8.4809
UCUGU	U-rich	1.188	1.16062	1.21538	0.255473	0.126812	0.384134	1.52834	1.35933	1.69736	1.80646	1.55338	2.05954	1.05359	0.973818	1.13336	0.0539352	0.0175936	0.736925	-0.952755	0.774684	-0.666307	1.6739	2.04153	-2.77128	2.38187	1.86627	1.72173	3.05592	0.608915	2.75339	1.23437	4.20257	1.53361	1.56471	1.75421	2.37827	4.06587	1.84723	2.52849	2.20459	1.59485	3.41109	3.82536	4.61006	1.72752	6.26262	2.13014	1.45142
UCUUC	U-rich	0.428126	0.411457	0.444796	-0.0151622	-0.123733	0.093409	1.85657	1.68744	2.02569	2.0537	1.91935	2.18805	1.34334	1.28545	1.40123	2.48315	2.03225	3.96037	3.192	6.11568	4.24201	5.90765	2.35203	5.07705	2.47483	3.37528	0.592524	1.12779	3.267	3.63876	2.81817	6.45079	3.73149	3.96592	6.02383	9.77689	8.40905	11.2592	10.5447	7.99339	11.7558	10.0248	9.87305	7.65006	5.11066	9.9386	8.08106	7.20173
UCUUU	U-rich	0.771209	0.753743	0.788674	0.382833	0.299729	0.465938	2.45823	2.33188	2.58458	2.27796	2.13538	2.42054	1.15616	1.10978	1.20253	-5.51456	-8.10651	-4.50302	-1.71841	-1.7951	-0.89933	-2.4115	-6.74954	-6.98692	1.27437	-4.29606	-5.983	-1.21687	-6.52018	-4.20946	-2.35419	-1.46046	-1.88373	0.232418	0.0369494	3.05683	2.78158	2.42227	5.24304	2.07124	1.79179	3.94342	6.95421	3.87762	3.39185	2.13574	1.02451	1.92869
UGAAA	A-rich	0.369322	0.345015	0.39363	1.91615	1.81024	2.02206	0.536567	0.30669	0.766444	4.88949	4.48983	5.28916	-0.211776	-0.306571	-0.11698	-4.38517	-2.21822	-5.39707	-5.47545	-7.81253	-3.99269	-9.9936	-1.34081	-5.29678	-5.14557	-1.4911	0.863767	0.181715	-2.47049	-2.22936	-2.77725	-3.73695	0.584487	-0.308589	0.894642	-0.703631	-0.38955	-3.51088	1.63667	1.65372	0.42331	-0.82108	-0.991427	-1.36125	0.876384	3.77416	0.888287	1.87256
UGGUU	U-rich	0.759128	0.740891	0.777366	0.670054	0.593591	0.746517	2.48694	2.34883	2.62504	2.70984	2.54346	2.87622	0.898028	0.827642	0.968414	-0.114809	-1.59159	-1.08802	1.55838	3.16224	5.94356	0.943311	4.94419	6.03203	5.62864	6.92576	1.60378	5.18592	5.05951	1.07651	5.51337	9.12574	5.02337	3.92533	5.96985	3.20803	10.3517	6.0739	3.75529	7.49677	4.53935	7.71451	5.36501	6.45147	9.02666	3.81312	3.05015	1.99314
UGUAA	UGUA-containing	1.84975	1.81121	1.88829	1.28102	1.15392	1.40813	-0.846445	-1.21511	-0.477783	4.93062	4.39676	5.46449	-0.572906	-0.712012	-0.4338	-3.62488	-2.83403	-2.77451	-7.03063	-5.70251	-7.01529	-4.0556	-3.79906	-3.88972	-1.33405	-3.34889	-0.125337	-2.92573	-0.226812	-3.66193	-3.31394	-6.00637	-1.14365	-0.187085	-2.30725	-2.16359	-7.64359	-4.99228	-4.7462	-2.22584	-7.10987	-4.16376	-5.6831	-3.18202	-2.10915	-3.2549	-0.669414	-4.60405
UGUAU	UGUA-containing	1.65002	1.61562	1.68441	0.603405	0.50968	0.69713	0.0210447	-0.138843	0.180932	3.52874	3.13936	3.91812	-0.0371584	-0.135877	0.0615602	-3.42231	-3.21924	-6.01138	-2.33827	-0.908286	-1.23574	-5.74549	0.428627	-3.74932	-1.6202	-0.534216	2.11937	1.4912	-2.28093	-0.95471	-6.80168	-0.736566	-1.89581	-3.20267	-4.21101	-3.34207	-0.761836	-2.46433	-1.21383	-3.66657	-0.573771	-1.43447	-3.14784	-1.96271	-2.94909	1.34641	-0.293239	0.643353
UGUGU	U-rich	1.32374	1.30224	1.34525	0.332531	0.242808	0.422254	1.84163	1.71329	1.96998	2.76368	2.55273	2.97464	0.904742	0.828695	0.980788	-0.274744	-0.897958	-4.65991	0.469702	-1.13767	-0.188834	-0.510776	2.38214	1.43577	2.85341	2.51299	0.555514	2.17691	-0.17953	3.27605	2.24743	4.54213	2.69903	3.54882	1.85092	1.4968	2.17166	-0.0105026	-0.759669	1.24719	4.05945	6.30635	2.96639	2.60599	-0.881295	3.28093	0.548957	0.27764
UGUUA	U-rich	0.818413	0.792943	0.843883	1.22419	1.11922	1.32917	1.78047	1.58871	1.97223	5.19756	4.94773	5.4474	0.479205	0.410686	0.547724	-6.73041	-4.82704	-5.69029	-5.0328	-12.1161	-5.77989	-4.80047	-5.22309	-1.17142	-2.20511	-3.63266	-5.59091	-5.49788	-3.83749	-4.37141	-6.00869	-5.10143	-2.33967	-2.09947	-4.33155	-1.70492	-9.25811	-6.52772	-1.72938	-2.32437	-4.11672	-1.63857	-4.5851	-3.21011	-1.12289	-0.782257	-2.73126	-3.15157
UGUUG	U-rich	1.15579	1.13192	1.17966	0.488792	0.392306	0.585279	2.19112	2.05814	2.3241	0.819651	0.62139	1.01791	0.853275	0.787915	0.918635	3.77524	4.39589	0.761199	3.9721	7.95455	8.61665	7.92698	10.7228	7.13762	6.45865	6.56851	10.6946	4.90368	7.24471	5.65019	7.70884	7.41079	8.21455	5.09029	7.69989	6.46642	9.79259	13.9729	10.6536	11.3406	6.35764	10.0716	4.72898	4.76102	9.01235	1.63073	9.2191	8.92961
UGUUU	U-rich	1.06712	1.05106	1.08318	0.566298	0.488212	0.644385	2.90769	2.78989	3.02549	1.78952	1.64739	1.93165	1.028	0.97983	1.07617	-5.30499	-4.70809	-2.87402	-8.24654	-5.33004	-7.50104	-0.829075	-3.6775	-3.1672	2.78105	-3.71153	-4.37043	3.61255	-4.57403	-6.08404	0.165081	-2.47804	4.4022	0.41377	-2.23549	0.244094	2.51253	2.6288	2.78902	1.31029	2.85109	0.856386	1.2253	3.37785	4.99957	6.34453	1.3261	1.80513
UUAUG	U-rich	0.733475	0.707862	0.759087	1.2841	1.20902	1.35919	2.19017	2.02536	2.35497	3.47425	3.23693	3.71157	0.173398	0.112412	0.234384	-2.02798	-1.80932	-4.18341	-2.71053	-3.85623	-2.90134	-5.5017	-5.80072	-3.98512	-3.24093	0.0995648	0.0486811	-3.95814	-2.21723	-3.48957	-3.36554	-2.74956	-4.27939	-1.81347	-1.86157	-2.02174	-1.2505	-2.65165	-6.88708	-2.24564	-3.28043	-2.86245	-1.1295	-1.0326	-4.03326	-2.48313	-0.0868093	-0.976974
UUAUU	U-rich	0.455576	0.431862	0.47929	1.19097	1.11088	1.27107	2.17678	2.05768	2.29588	3.99745	3.7841	4.2108	0.300296	0.242899	0.357693	-8.65574	-8.80284	-3.68612	-10.3972	-18.1103	-8.84908	-14.6348	-9.13067	-5.81702	-10.5195	-9.07756	-7.75196	-9.7876	-7.60575	-9.25893	-7.25759	-5.88477	-8.53796	-13.2176	-4.84748	-8.76772	-6.22205	-7.14937	-13.2782	-6.3812	-4.48691	-4.32587	-5.5377	-3.19143	-9.18653	-7.70771	-6.21002	-9.20465
UUCAU	U-rich	0.423412	0.401423	0.445401	0.66728	0.570581	0.763979	1.69109	1.53249	1.84969	3.39047	3.17222	3.60872	0.838296	0.785817	0.890776	-6.53548	-6.86075	-3.85755	-3.34462	-3.26521	-5.55145	-5.67992	-1.62912	-5.50899	-1.04492	-7.399	-2.29544	-6.64897	-1.56969	-2.49355	-6.7199	-4.79341	-3.00783	-3.33789	-3.31029	-0.988478	-1.56962	0.0241134	-1.42634	-1.49334	-0.109225	1.08594	-1.19251	1.90929	2.02856	-0.352206	-1.30295	-1.01817
UUCUC	U-rich	0.579061	0.562096	0.596027	0.0616991	-0.0424361	0.165834	2.25546	2.08708	2.42384	2.23963	2.10642	2.37284	1.4018	1.33113	1.47246	0.607259	1.72877	-0.0994163	-0.234436	3.10513	0.431025	3.91138	2.75208	3.39786	3.02645	0.0950882	0.633882	-0.321745	-0.902902	1.43486	1.70101	2.06705	4.68796	5.57583	1.34256	3.46705	2.63551	9.26197	5.871	8.17028	6.7783	5.91593	4.75557	3.44711	6.74684	6.48666	9.26003	4.89602
UUCUU	U-rich	0.724916	0.708107	0.741725	0.37404	0.285666	0.462414	2.49585	2.38282	2.60889	2.29935	2.19353	2.40517	1.26934	1.21963	1.31905	-5.20294	-5.95571	-6.03364	-4.50143	-0.365002	-3.66409	-0.22936	-2.77581	1.64417	-4.40963	-5.16185	-2.32841	-6.64078	-4.78699	-2.33224	1.5592	-1.3418	3.01679	0.207431	2.59734	2.21063	4.76696	9.15694	5.66842	6.75741	5.20056	7.74942	6.25104	5.25409	3.56316	6.09617	6.62521	5.4394
UUGGU	U-rich	0.785713	0.766687	0.804738	0.683176	0.60352	0.762831	2.40538	2.28871	2.52205	3.19973	2.99104	3.40842	0.887055	0.815101	0.959008	1.70307	-0.615751	0.522816	1.2949	2.144	1.61615	3.30355	3.33911	4.1649	3.12013	-0.811157	3.25268	5.49511	1.4996	3.06867	5.47197	4.23712	2.94774	1.10909	3.56634	2.55087	7.70196	5.38581	0.86701	5.29046	10.1573	4.71099	6.34141	4.75592	0.914698	4.24802	2.51588	0.408321
UUGUA	UGUA-containing	1.84688	1.81275	1.88101	0.585956	0.45878	0.713132	0.362234	0.137242	0.587226	3.30235	2.9336	3.6711	0.157918	0.0609014	0.254934	-1.63424	-4.85908	-2.65593	-1.70032	-6.98084	-5.56038	-3.44233	-2.18969	-1.2673	-0.561217	1.14629	-2.70302	-0.643985	-3.29945	-2.39426	-4.49313	-0.211236	-1.14311	-3.16975	-1.80079	-3.68989	-6.16336	-3.48332	-1.44219	-2.82705	0.487608	-2.30021	-0.491655	-0.836605	-0.966283	-2.10317	-2.4491	0.122604
UUGUG	U-rich	1.21213	1.19019	1.23407	0.630837	0.534734	0.726941	2.7607	2.59925	2.92215	2.33811	2.02432	2.6519	0.993682	0.910129	1.07723	0.226723	-0.999512	1.51577	0.561566	1.78577	3.40743	4.75985	5.97574	7.65521	2.94721	2.52378	5.61088	5.17641	6.93775	5.23322	4.12113	3.89297	3.11811	6.96121	-0.914641	0.595734	1.66473	3.49201	4.86412	9.52175	6.39434	4.96988	3.95844	2.68107	3.36824	4.60646	4.71778	6.87736
UUGUU	U-rich	1.1066	1.0901	1.12311	0.502542	0.4139	0.591183	2.50229	2.39967	2.60491	1.971	1.84172	2.10029	1.10039	1.04964	1.15114	-4.87664	-7.21352	-6.9393	-9.64475	-3.11225	-1.98109	-3.3161	-4.58021	1.38019	-6.90414	-3.27093	-3.68949	-4.77404	-3.35877	-2.90449	-4.35666	-0.34871	-0.0660366	-3.9157	2.58851	2.73903	4.05082	4.77894	6.11382	1.5653	4.88219	0.484201	2.67994	2.96154	3.33067	-0.139429	2.6251	-1.96502
UUUAU	U-rich	0.557909	0.535727	0.580091	1.46185	1.38732	1.53638	2.33145	2.19013	2.47277	3.32983	3.16975	3.48992	0.391242	0.337912	0.444572	-5.25171	-8.03292	-10.0583	-8.42363	-7.53934	-7.28804	-8.78143	-12.8826	-11.5128	-4.97834	-6.18576	-9.84855	-10.8515	-8.63054	-12.8612	-13.6544	-5.05346	-8.88294	-2.15434	-10.1349	-4.55291	-9.61487	-3.6396	-5.88477	-4.84175	-3.63223	-4.55274	-4.81507	-6.53545	-6.59013	-4.55426	-4.49375	-4.62208
UUUCA	U-rich	0.398707	0.379552	0.417862	0.742446	0.658144	0.826749	2.55633	2.35748	2.75519	3.18669	2.94959	3.42379	0.927847	0.869388	0.986307	-5.17011	-3.18941	-2.69833	-5.46575	-3.74763	-1.94694	-1.15726	-4.49207	-4.47638	-6.07061	-0.320428	-6.78258	-1.48607	-2.99681	-5.86177	-4.17647	-0.277343	-3.04472	-2.38454	-2.85337	-2.08682	-0.252816	3.60977	-1.22854	4.03547	0.341669	1.3461	0.793553	1.12148	1.17242	0.0303319	-1.06522	-0.0683282
UUUCU	U-rich	0.751466	0.734743	0.768188	0.351024	0.268042	0.434006	2.80244	2.68051	2.92437	2.15627	2.04975	2.26279	1.18028	1.12955	1.23101	-1.91571	-6.45857	-6.20237	-5.32403	-5.36158	-4.88359	-6.20119	-5.62635	-4.38489	-6.42246	-1.86814	-4.86544	-4.39825	-6.75069	-1.60299	-2.32662	-0.358221	-2.02174	0.414233	1.57865	0.124389	1.5159	0.283979	6.35595	0.652375	4.84315	4.96928	4.97097	0.0568471	4.62495	7.21255	4.43803	7.00792
UUUGA	U-rich	0.603382	0.586969	0.619794	0.983592	0.914969	1.05221	2.37254	2.21778	2.5273	2.34498	2.15407	2.53589	0.702598	0.633007	0.772188	-1.7241	-2.77498	-4.51282	-2.78219	-2.56351	-5.77023	-3.51603	-1.87374	-1.74346	-3.9666	-1.33575	0.332986	-4.02718	-2.73034	-4.79042	-0.937506	-2.28679	0.28977	-0.233791	4.43068	-1.73563	-2.86225	-1.86176	-0.199638	0.102925	2.73363	-0.138596	-2.21179	0.669169	0.571882	2.31653	-2.52039	0.51334
UUUGC	U-rich	0.518302	0.499079	0.537526	0.287835	0.185219	0.390452	2.95304	2.73821	3.16788	2.86588	2.61645	3.11531	1.11598	1.03703	1.19494	3.10654	1.76846	0.766158	2.1862	1.94647	4.4916	3.52228	2.09094	0.883757	1.49654	1.69376	-0.0383908	0.298453	3.93858	1.912	3.52029	0.333908	-0.327982	0.278495	1.61887	3.63416	7.28412	3.8252	4.37335	4.29396	4.35409	5.87727	3.18627	3.96496	1.05703	4.95091	2.96435	0.592339
UUUGG	U-rich	0.815968	0.798874	0.833062	0.704199	0.635212	0.773185	3.31564	3.16402	3.46726	2.7075	2.45842	2.95658	0.872763	0.805636	0.939889	2.14455	5.82761	1.01264	1.83801	3.31377	4.46923	3.63317	5.55247	9.08957	5.12483	4.03592	2.76188	3.52828	1.93899	3.72019	6.21914	1.57162	2.24566	2.05367	3.16874	5.07998	1.96531	5.07341	7.94301	7.67633	5.07956	3.96277	5.5243	1.3553	5.42132	6.12924	2.90145	6.71091
UUUGU	U-rich	1.30346	1.28428	1.32264	0.446279	0.362493	0.530065	2.60939	2.49936	2.71941	2.36669	2.20628	2.5271	0.975407	0.922863	1.02795	-5.21693	-4.47276	-9.43309	-5.44411	-6.68552	1.43018	-0.558729	-2.32904	-4.03629	-5.07764	-5.29478	0.208702	-2.40096	-5.18613	-2.64577	-2.11621	2.2867	-2.80499	-3.10038	-3.50882	-2.97148	1.39889	1.43258	2.75339	6.88571	0.536623	6.07597	-2.15039	1.1183	-2.44943	1.03669	1.55851	-1.9202
UUUUA	U-rich	0.474925	0.455454	0.494397	1.20421	1.12274	1.28568	2.43481	2.29199	2.57763	3.04457	2.8676	3.22154	0.566435	0.513108	0.619762	-3.96005	-18.1671	-11.6362	-11.0976	-4.91528	-11.4582	-10.4872	-14.8552	-6.88273	-8.03653	-5.13486	-8.41433	-9.25967	-9.06518	-12.1083	-11.8529	-10.9372	-6.02841	-10.2682	-10.6947	-11.0846	-3.9724	-6.33737	-5.98451	-10.8806	-4.86987	-7.60435	-4.85985	-2.50619	-4.6735	-3.97601	-2.28622	-11.2628
UUUUC	U-rich	0.614348	0.596507	0.632189	0.220183	0.133243	0.307123	3.08232	2.93934	3.22529	2.16169	2.01096	2.31243	1.11489	1.06761	1.16218	-2.07629	-2.30236	-4.13208	-4.51041	-3.0691	-3.79051	-7.03216	-5.7646	-5.7223	-0.441926	-7.3699	-0.405427	-0.92558	-1.47458	-2.4912	0.461108	-4.17331	0.0890243	-3.40654	1.28333	2.79583	-0.781688	4.469	3.30823	0.75778	5.41621	5.32415	1.52072	3.1399	2.33186	1.25256	2.77755	2.26606
UUUUG	U-rich	1.02616	1.00924	1.04309	0.617809	0.537973	0.697644	3.40581	3.28844	3.52319	2.29521	2.12579	2.46463	0.92509	0.877025	0.973154	-2.36965	-8.83999	-7.79132	-5.96015	0.429911	-0.0781681	0.431825	-1.24822	-4.38345	-0.738814	-3.50964	-0.574836	-5.82315	-1.24991	-2.51011	-3.43665	-2.42153	-2.17377	0.282112	-2.7015	-0.165357	1.66338	6.95294	1.61394	5.88369	4.40443	-4.93141	1.60732	1.15961	3.8023	3.0538	2.73044	0.59852
UUUUU	U-rich	0.724996	0.710095	0.739898	0.502847	0.424194	0.5815	2.90717	2.8067	3.00764	1.88325	1.77736	1.98914	0.80989	0.775809	0.84397	-17.4777	-10.6966	-17.9227	-10.9468	-16.3043	-19.8052	-17.596	-14.3487	-16.8871	-21.3637	-15.3914	-16.735	-11.5935	-16.8919	-7.35567	-9.83195	-7.43676	-10.6516	-3.81914	-7.94552	-6.7808	-7.03943	-7.35602	-5.70269	0.729001	2.29931	-2.50359	1.09983	0.399013	-0.947697	0.0907607	-4.08504	-3.50436
[truncated: 468 more columns]

## Sheet: 6mer motif importance
		[-150, -30) region			[-30, -15) region			[-15, -5) region			[-5, 2) region			[2, 15] region			Sum importance profile
Motif	Family	Mean importance score	95% confidence interval: Lower bound	95% confidence interval: Upper bound	Mean importance score	95% confidence interval: Lower bound	95% confidence interval: Upper bound	Mean importance score	95% confidence interval: Lower bound	95% confidence interval: Upper bound	Mean importance score	95% confidence interval: Lower bound	95% confidence interval: Upper bound	Mean importance score	95% confidence interval: Lower bound	95% confidence interval: Upper bound	-250	-249	-248	-247	-246	-245	-244	-243	-242	-241	-240	-239	-238	-237	-236	-235	-234	-233	-232	-231	-230	-229	-228	-227	-226	-225	-224	-223	-222	-221	-220	-219	-218
AAAAAA	A-rich	-0.182502	-0.241907	-0.123096	0.422081	0.273706	0.570455	-0.0684856	-0.442807	0.305835	1.64778	1.07363	2.22193	-0.277662	-0.467701	-0.0876228	-1.58734	-6.76968	-12.5839	-10.4898	-7.45719	-14.2415	-16.1077	-4.72879	-5.35611	-7.27652	-7.8395	-8.77096	-11.1769	-11.4613	-9.07218	-6.37605	-2.67786	-8.71125	-9.13611	-7.18552	-8.1746	-5.65266	-5.60714	-8.22612	-9.57692	-4.9026	-5.9777	-8.60518	-6.03505	-5.19716	-4.84344	-9.42596	-9.37811
AAAAAC	A-rich	0.08093	0.0210509	0.140809	0.490799	0.198152	0.783446	-0.482524	-1.03276	0.0677138	3.06249	1.63029	4.49469	-0.366717	-0.595138	-0.138296	-1.23156	-1.79347	-2.05876	-0.798911	-0.804292	-3.48949	-1.89779	-10.738	-1.05791	-2.75787	-2.96158	-2.88508	-3.04223	-1.11569	-1.11743	-2.12169	-0.481619	-1.89628	-0.855184	-1.51458	-2.35928	-0.543422	-4.13572	0.334222	-1.50039	-1.48416	-0.255568	0.195212	-1.18471	-2.16606	-2.05688	-0.467884	0.217084
AAAAAG	A-rich	0.0136915	-0.0480273	0.0754103	0.715918	0.43279	0.999046	0.0199576	-0.617222	0.657137	3.61068	2.24755	4.97381	-0.44802	-0.773361	-0.122679	-0.724824	-0.896232	-0.728062	-3.4501	-2.16633	-5.02189	-5.20367	-4.16708	-3.13616	-4.20228	-2.76558	-3.35945	-3.0891	-6.85741	-0.436648	-5.03875	-3.66452	-3.69172	-2.31006	-0.233191	-0.692586	-0.873616	1.00842	-1.6349	-2.25248	0.0733593	-0.817568	0.274484	-1.33006	-0.639771	-0.942195	-0.859892	0.388001
AAAAAU	A-rich	0.053555	-0.0133878	0.120498	1.02116	0.796196	1.24612	0.591486	0.17914	1.00383	2.63403	2.0192	3.24886	-0.445062	-0.672105	-0.21802	-0.252535	-2.30129	-5.20969	-10.1334	0	0	-3.02157	-5.8678	-0.882369	-4.03745	-11.7883	-3.08886	-2.61786	-4.86366	-8.89952	-3.53112	-5.14115	-1.54032	-10.3736	-3.91127	-3.73189	-5.48909	-3.24449	-8.38156	-7.16408	-4.94562	0.0171469	-1.9695	-2.78702	-2.68717	-3.66497	-3.25345	-2.36047
AAAACA	A-rich	0.144528	0.0921682	0.196888	1.17048	0.864014	1.47694	-0.288159	-1.25595	0.679626	3.02882	2.0538	4.00383	-0.446776	-0.704169	-0.189383	-1.36087	-1.54765	-1.22461	-2.71739	-0.96137	-2.04315	-3.40623	-1.33606	-7.25081	-2.45042	-5.45303	1.22216	-2.9753	-2.16994	-2.75172	-1.70507	-2.95335	-1.25327	-3.4956	-3.28345	-1.04544	-1.1534	-2.19967	-4.97367	-0.948867	-4.11198	-2.02095	-0.338222	0.243399	-0.901688	-0.737335	-1.16742	-1.77103
AAAACU	A-rich	0.409439	0.355634	0.463245	0.859512	0.605299	1.11373	0.554305	0.114533	0.994077	4.62392	3.55801	5.68984	-0.192304	-0.419816	0.0352086	0.133371	-2.65028	-2.97736	-1.20688	-0.627325	-0.912882	-2.4631	-4.41661	-4.04664	-5.62098	-2.52868	1.34884	-3.80698	-3.29464	0.405722	-2.88039	-1.68926	-1.38093	-1.32211	-2.02362	-0.418078	-1.22685	-0.929623	-2.65024	-0.155014	-0.927083	-1.88801	-0.254853	-1.15943	-0.822408	-2.18928	-0.738889	-0.742681
AAAAGA	A-rich	0.0238539	-0.034232	0.0819399	1.36616	1.06087	1.67145	0.302996	-0.244717	0.850709	4.89313	3.17181	6.61445	-0.158274	-0.465054	0.148506	0.294298	-2.19115	-1.26415	-0.953768	-2.51541	-1.69268	-3.72139	-3.30462	-1.3926	-6.48855	-2.61742	-3.88141	-3.95395	-2.25647	-3.6081	-1.28771	-5.34664	-2.13687	-0.903324	-1.2006	1.32063	0.644293	-2.22117	2.29208	0.115977	-0.189798	-1.55579	0.289967	1.33152	2.09436	0.95471	-1.22496	0.552175
AAAAUA	A-rich	-0.0362453	-0.110743	0.0382522	1.17053	0.967305	1.37376	-0.0401881	-0.476664	0.396288	4.31796	3.14323	5.49269	-0.338083	-0.610364	-0.065802	-1.51498	-0.880764	-3.49427	-2.52324	-6.16498	-9.81677	-6.55954	-3.23338	-1.44096	0	-3.55253	-1.85993	0	-3.38182	-3.06314	-1.79535	-5.22591	-6.89691	-0.832623	0	-3.59225	-3.54147	0	-3.8198	-7.61424	-4.07697	-5.38905	-0.290322	-1.46354	-3.90584	-0.326648	-1.86651	-0.36784
AAAAUC	A-rich	0.0512918	-0.00755662	0.11014	1.01668	0.746145	1.28722	0.633009	0.275968	0.99005	3.38182	2.39537	4.36827	-0.295028	-0.524755	-0.0653002	-1.90327	-0.588175	-0.969712	-0.402351	-0.827019	-1.61124	-1.70931	-1.78996	-3.81664	-3.12382	-2.55415	-7.02083	-0.924085	-1.65536	-1.65656	-5.98561	-3.07498	-1.98933	-1.47212	-3.07105	-1.38686	-0.277768	-0.0341018	-0.677761	-2.56956	-0.479113	-3.0202	-1.13845	-1.01413	-1.30526	-1.46993	-0.0766212	-1.83455
AAAAUG	A-rich	0.376055	0.3161	0.436009	1.43084	1.21194	1.64974	0.737191	0.102095	1.37229	4.33604	3.24122	5.43085	-0.5226	-0.755583	-0.289616	-1.33583	-0.540904	-0.850104	-4.20175	-7.18246	-3.1764	-2.36463	-1.86848	-1.50972	-2.89896	-2.79436	-5.94963	-2.50714	-0.507951	-3.29658	-2.97459	-4.32356	-2.76427	-2.07824	-4.82009	-2.24494	-1.47077	-1.59043	-1.94253	-2.35088	-1.18137	-5.7664	-1.27788	-0.539886	-2.84975	-0.977375	-0.453533	-0.235405
AAAAUU	A-rich	0.24433	0.172191	0.316469	1.18212	0.960548	1.40368	2.0408	1.63851	2.44309	3.43856	2.87882	3.99831	-0.237515	-0.447183	-0.027847	-4.82221	-3.44922	-5.66744	-3.91145	-0.787372	-6.85175	-6.23502	-3.36203	-5.26314	-2.65195	-1.95858	-3.2066	-2.74337	-4.35835	-3.62741	-4.42469	-2.60511	-0.952686	-3.48722	-5.0105	-1.74729	-3.39509	-3.54333	-0.190694	-5.23028	-4.08193	-1.74938	-3.56067	-3.31696	-1.59359	-1.06779	-4.07199	-4.08837
AAACAA	A-rich	0.187142	0.136105	0.238178	1.34076	1.10601	1.5755	0.0777374	-0.48265	0.638125	2.71825	1.44196	3.99454	-0.505379	-0.806286	-0.204472	-0.183067	-2.66438	-2.90492	-2.2707	-3.73188	-4.49088	-6.45306	-2.17097	-2.74457	-5.2614	-4.87806	-4.90736	-2.54174	-0.93285	-3.54027	-4.79598	-3.74362	-1.34767	-0.475294	-2.66078	-1.41928	-0.710284	-1.59872	-1.72414	-4.6462	-1.22948	-2.20107	-1.9708	3.48772	-0.623213	-0.0913439	-1.81642	-0.686634
AAACAG	A-rich	0.247578	0.199656	0.2955	1.10946	0.730225	1.4887	0.493298	-0.293593	1.28019	3.64519	1.29212	5.99825	-0.0402202	-0.386033	0.305593	0.247872	-0.283236	-0.294061	-0.277106	-0.406412	0	-0.508731	0.195585	-0.706609	-0.899875	0.804267	-0.345588	0.0458564	-0.284291	0.567609	-1.00371	0	0.442188	-0.400038	0.162847	-0.261854	1.79553	-2.57485	1.41355	0.383095	0.135937	-0.603368	0.0571485	-0.00249288	1.20279	0.429288	1.00336	0.751862
AAACAU	A-rich	0.397662	0.341546	0.453779	0.84931	0.609468	1.08915	0.716677	0.188615	1.24474	4.21329	2.93658	5.49	-0.366671	-0.573651	-0.15969	-2.47267	-0.65427	-0.669553	-1.70902	-2.56221	-2.55649	-3.60682	-0.292523	-2.40314	-2.64017	-1.8344	-2.26184	-2.49774	-2.72236	-2.19312	-2.25048	-1.19196	-1.42293	-5.80758	-2.07074	0	-2.46424	-0.404735	-1.17094	-3.39719	-1.20629	-1.86447	-0.606326	-0.619749	0.0970956	-0.922418	-0.890162	0.368039
AAACCA	A-rich	0.0234208	-0.0248195	0.0716611	0.437208	0.199626	0.674789	-0.187136	-0.983008	0.608737	4.64895	3.47698	5.82093	-0.1392	-0.359763	0.0813627	0.238505	-0.719704	-1.01965	-1.41105	-0.545739	-0.998788	-1.74609	-2.44152	-0.367785	-1.57196	-0.616777	-0.536547	-0.604595	-1.16916	-2.27953	0.105415	-4.83346	-1.54079	-0.164612	-0.232045	0.902602	0.35025	-1.2388	-0.375593	-1.20288	-0.574859	-1.76092	0.558491	1.1531	-0.287995	-0.763728	0.188477	-0.165682
AAAGAA	A-rich	0.118124	0.0653367	0.170911	1.63325	1.40545	1.86104	1.35992	0.461405	2.25844	4.2215	3.14382	5.29918	-0.220431	-0.570553	0.12969	0.263206	0.742601	-2.07884	-0.778771	-0.649844	-2.86065	-3.12165	-1.94236	-3.09549	-1.89099	0.203164	-3.56194	-1.93011	-1.02696	1.47579	-3.10244	-0.337371	1.0623	0.118146	0.230739	2.08546	5.54178	1.20653	2.62722	1.51604	1.12694	-0.0573153	1.62806	0.190435	2.01261	0.239339	1.3588	1.75355
AAAGAG	A-rich	0.152607	0.0970792	0.208135	1.32025	0.99136	1.64913	0.907549	0.42249	1.39261	4.15653	2.67968	5.63338	-0.540897	-0.772529	-0.309265	3.70512	3.32855	1.30175	2.722	-2.06747	-0.294146	-1.50178	-1.1864	0.881397	-0.0532186	-1.45734	-0.820146	0.432627	-0.608015	0.64005	0.591632	1.93591	0.0144678	-2.04603	1.66479	4.30566	2.45506	2.55991	2.70259	3.63881	0.599109	3.61864	1.21298	2.34499	1.15233	1.70662	2.42197	2.39392
AAAUAA	A-rich	0.0785838	0.00919026	0.147977	2.34176	2.16979	2.51372	0.508465	-0.183716	1.20065	3.78706	2.98552	4.5886	-0.413137	-0.730413	-0.0958611	-0.831355	-4.15712	-0.880169	0	-3.03399	-2.74874	-5.45028	-0.717676	-4.63495	-0.966056	-2.8875	-1.91265	-2.77081	-4.2574	-4.48342	-0.547473	-2.51526	-2.86998	-1.59533	-3.62993	0	-1.37819	-2.00736	-1.37412	0	-1.96559	-2.69731	-0.992358	-2.292	-2.16699	-3.89219	-1.32166	0
AAAUCA	A-rich	0.0432473	-0.00696948	0.093464	1.30216	1.10748	1.49684	0.559467	0.167955	0.950979	4.85917	3.89087	5.82748	-0.280353	-0.497898	-0.0628083	-0.790209	-2.06104	-1.12079	-1.89697	-2.5786	-3.16865	-2.94878	0.588462	-1.48002	-2.18368	-2.67241	-1.66426	-5.42835	-1.17148	-3.07508	-1.22439	-3.51387	-3.80466	-0.383499	-1.97175	-1.69538	-0.84643	0.0111078	-0.82325	-1.71073	-0.243069	-0.011577	-0.860736	-1.28275	-0.645198	-1.11368	-0.629815	-0.27802
AAAUGA	A-rich	0.192481	0.12925	0.255712	2.07933	1.89211	2.26655	1.24778	0.674724	1.82084	5.40717	4.47339	6.34095	-0.473935	-0.804165	-0.143705	-1.18033	-1.88743	-0.742055	-2.83318	-1.83007	-4.22879	-5.26303	-1.42952	-2.56932	-0.199213	-3.57162	-2.06969	-4.46705	-0.762835	0.277916	-1.1601	-2.1183	-0.851531	-1.53639	-1.92058	-1.19123	-1.27679	-0.274572	0.842525	-0.767127	-2.87427	-0.570537	-0.398912	0.200657	1.11011	-0.937174	0.0427129	-0.012721
AAAUGU	Other	0.992858	0.923309	1.06241	1.42496	1.24593	1.60399	1.58042	1.20818	1.95267	4.3616	3.19432	5.52888	-0.124538	-0.381519	0.132442	-1.82977	-1.59558	-0.11074	-0.388461	-1.88623	-0.70794	-0.298011	-4.04289	-2.66458	-1.17716	-1.1009	-2.14557	-1.8453	-2.12174	-0.134011	-0.66707	-2.3292	-3.48687	-2.12375	-1.58288	-1.95286	-2.22657	-1.51597	0.0675069	-0.89956	-2.80754	-0.593841	-1.37623	-3.08938	-1.65018	-0.540051	-2.18077	-0.425754
AAAUUG	Other	0.604052	0.524649	0.683454	1.30702	1.10616	1.50788	1.6704	1.32191	2.01888	4.80222	3.74565	5.8588	-0.115042	-0.324331	0.0942458	-2.97139	-1.43121	-2.75982	-3.65172	-2.19289	-1.75091	-2.48961	-3.83957	-0.787527	-1.86243	-2.46648	-0.592199	-2.37071	-1.1485	-1.77734	-0.665497	-2.72783	-2.07383	-5.8414	-4.34312	-0.616531	-3.10121	-0.351383	-1.29269	-2.15839	-2.52732	-2.65371	-1.97637	-1.80726	-0.887552	-2.50977	-0.760718	-0.461296
AACAAA	A-rich	0.156449	0.0998216	0.213076	0.918106	0.675392	1.16082	-0.186663	-0.652818	0.279492	2.02582	1.29456	2.75707	-0.499094	-0.802708	-0.195481	-0.141978	-2.67077	-2.94162	-3.25066	-4.79529	-2.03202	-8.19392	-7.8558	-1.29725	-7.2714	-6.23618	-6.51944	-2.28467	-1.83441	-1.21606	-2.49837	-4.25994	-5.8548	-1.36963	-0.622484	0.239736	-4.09801	-1.86292	-2.83943	-3.31855	-1.39036	-3.71185	-3.35801	-1.31008	1.95354	-1.74405	0.797437	-0.681456
AACCAA	A-rich	0.0454263	-0.0170502	0.107903	0.228765	-0.0547408	0.512271	-0.908839	-1.61744	-0.200236	3.42614	2.09404	4.75824	-0.0472588	-0.363863	0.269346	-0.979664	-0.506305	-1.24887	-3.07992	-1.20942	-1.86121	-0.41908	-0.359904	-3.43547	-0.137673	-0.877655	-0.0542129	-1.76042	-1.06744	-2.09772	-0.724536	-0.32753	-2.6297	-1.38786	-0.0992657	0.617115	-0.14116	0.152955	-1.64608	-0.302906	-0.00239406	-1.13789	-0.331779	0.86144	-0.780485	4.71496	0	0.204493
AAGAAA	A-rich	0.0549621	0.00836447	0.10156	1.52918	1.32181	1.73656	0.974648	0.471875	1.47742	3.7207	3.22974	4.21166	-0.123165	-0.335474	0.0891441	-3.363	-1.58449	-2.25714	-2.96178	-1.18426	-0.189718	-4.1797	-3.6107	-1.53814	-2.54093	-1.35258	0.854389	0.142711	-0.587038	0.157321	-0.453707	1.07967	2.62709	1.74253	1.78407	4.4966	4.65714	7.31022	3.68407	1.32638	1.27721	1.4735	2.24475	1.50107	2.58535	3.91504	5.42199	2.75171
AAGAAG	A-rich	0.107606	0.0558147	0.159396	1.17939	0.92432	1.43445	0.593804	-0.1607	1.34831	2.38019	1.46872	3.29166	-0.149822	-0.485343	0.1857	13.6047	11.0129	23.9208	14.3913	18.3102	19.5331	16.0178	10.4523	16.1074	22.5193	11.4005	19.2109	16.2185	10.47	15.5149	15.5997	10.1729	13.8727	25.658	14.7873	22.615	16.769	18.2443	17.1713	17.7949	22.4498	13.5768	15.2949	24.9609	14.6376	18.1498	19.0075	14.9332
AAGAGA	A-rich	0.261666	0.213376	0.309956	1.24916	0.976821	1.52151	0.302446	-0.510243	1.11513	2.96332	2.15626	3.77037	-0.546337	-0.943859	-0.148815	2.14079	5.10461	2.58265	3.55324	6.04064	3.46023	0.308922	2.30676	1.07281	2.5355	2.11746	1.73718	0.32608	5.39649	5.06117	2.5434	1.72192	6.76074	4.25729	3.66394	5.78703	5.69199	5.97245	5.52574	3.33352	5.80732	0.858385	8.33154	4.55987	1.63994	1.76884	4.25461	8.20041
AAGUUU	Other	0.528247	0.491544	0.56495	1.10881	0.968274	1.24934	3.45596	3.177	3.73492	4.47789	3.79869	5.15708	0.524688	0.376693	0.672683	-2.52543	-3.55774	-3.15398	-3.63338	-1.37925	-4.5417	-2.73311	-1.52615	-2.39619	-3.8071	-2.13674	-0.904695	-1.32716	0.33696	-1.88203	-0.230326	-4.99921	-1.60653	-2.28325	-1.81965	1.27412	-0.50062	0	-0.596698	-0.0322909	-2.09972	-1.40927	0.24513	-1.24462	-0.887518	-0.514221	-1.66531	0.130463
AAUAAA	A-rich	0.189305	0.115621	0.262988	3.34846	3.20285	3.49407	1.319	0.71216	1.92585	3.83657	2.56673	5.10641	-0.48525	-0.792771	-0.177728	-2.22505	-1.73972	-0.601198	-0.898411	0	-2.73288	0	-3.43525	-2.96275	-5.67689	-3.15724	-1.64988	-2.49679	-3.39	-7.28529	-2.70017	-5.76057	-3.22058	0	-1.19277	-2.12779	-4.75322	-4.79092	-4.2162	-1.37628	-1.84744	-1.111	-3.14711	-2.4028	-2.97987	-4.04269	-4.59589	0
AAUAAU	A-rich	0.404296	0.321574	0.487018	3.03706	2.86509	3.20903	1.13926	0.796185	1.48233	4.1187	3.32955	4.90785	-0.539579	-0.787149	-0.292009	0	-3.77558	-1.85154	-2.89494	-2.84066	-1.26566	-0.661869	-4.37103	-4.05301	-3.6439	-1.58338	-3.5142	-1.33091	-0.290308	-8.27512	-1.32902	-1.73614	-3.70346	-1.1269	-1.40234	-2.87931	-1.22918	-2.61974	-2.77354	-0.325155	-2.61687	-4.87212	-4.69163	-6.89906	-0.879942	-1.09253	-3.95726	-0.766465
AAUCAA	A-rich	0.0223006	-0.0431085	0.0877098	2.18099	1.97034	2.39164	0.600041	0.131175	1.06891	4.31302	3.52892	5.09712	-0.0125429	-0.363575	0.338489	-2.07687	-1.36402	-1.46559	-2.77485	-2.2217	-1.02769	-2.3722	-0.941419	-3.17959	-1.71701	-4.6246	-2.03554	-1.47447	-1.57437	-1.25097	-2.36533	-1.24846	-2.44317	-2.75723	0.592132	-0.728653	-2.06514	-1.95193	-0.695765	-0.464837	-2.41302	-0.880571	-1.89046	0.214467	2.56396	-0.163765	-1.03712	0.175476
AAUGAA	A-rich	0.344283	0.267012	0.421555	3.33989	3.15722	3.52255	0.922295	0.267836	1.57675	3.63498	2.71854	4.55143	-0.514949	-0.81718	-0.212718	0.199132	4.10713	-1.71012	-0.266279	-2.72794	-3.97773	-3.77741	-5.22714	-1.68553	-1.94277	-0.466803	-0.605142	-2.3355	-2.50966	-2.34114	0.509348	0.129562	-2.3618	0.490061	-0.375417	-1.97037	-0.321508	0.0277626	-2.62853	1.57093	0.934824	-2.25078	-1.4107	0.418287	-0.489402	0.175267	-0.333884	1.23313
AAUGUA	UGUA-containing	1.69706	1.60307	1.79106	1.4223	1.24712	1.59749	-0.477588	-0.875545	-0.0796304	3.35634	2.26172	4.45097	-0.940031	-1.27822	-0.601837	-0.325441	-3.83079	-2.08965	-2.95203	0	-1.12982	0.115973	0	0	0.310985	-0.396074	-1.29986	-1.25137	-1.18771	-0.523674	-2.32356	-0.779534	-0.614872	-3.34192	-2.08286	-0.834761	-1.29092	-4.80111	-3.53535	-0.408099	-2.9116	-0.760551	-0.753836	-1.01644	-1.69217	-2.11415	-0.0737179	-0.0736774
AAUUUG	Other	0.769012	0.7103	0.827725	1.45261	1.31167	1.59355	2.82194	2.55848	3.0854	6.12843	5.4082	6.84865	0.12081	-0.0459898	0.287609	-1.75373	-1.89528	-3.19798	-0.145871	-2.40362	-0.521919	-3.42145	-1.72101	-0.85469	0.00772299	-1.22067	-2.04457	-2.06497	-1.12695	-1.42335	-0.125409	-2.27757	-1.04846	-2.1617	-0.449222	-2.01857	0.400019	0.493272	-0.742297	-1.04944	-3.91233	-0.909594	-0.988503	-1.5447	0.0635413	-1.10019	-1.32153	-0.926143
AAUUUU	U-rich	0.695067	0.645721	0.744413	1.35559	1.21854	1.49264	2.90897	2.66632	3.15162	4.85064	4.36978	5.3315	0.463234	0.291161	0.635307	-3.53228	-1.5963	-3.63848	-1.73808	0	-5.38973	-2.76899	-2.17691	-2.68184	-3.47936	-2.13533	-2.25142	-0.758568	-2.6805	-0.870593	-2.02566	-2.00973	-3.20284	-2.56986	-4.87812	-0.317702	-4.80626	-0.851945	-1.77056	-1.21554	-3.06532	-1.68787	-1.32061	-2.69773	-2.36812	-3.59433	-1.26037	0.290696
ACAAAA	A-rich	0.0590517	0.00553707	0.112566	0.452279	0.142911	0.761648	-0.146653	-0.949649	0.656343	2.69776	1.86808	3.52745	-0.356992	-0.581237	-0.132747	-4.15799	-2.28727	-1.16081	-3.57033	-4.06222	-2.06834	-3.60048	-4.87135	-6.07595	-1.48262	-2.66684	-3.83117	-1.63201	-2.12479	-1.28036	-2.17841	-3.03918	-2.04254	-2.67427	-0.49537	-1.44024	-0.984483	-2.2113	-1.72708	-0.479422	-2.81543	-0.176366	-0.450647	-1.19427	-1.18957	-0.961571	-0.946717	-0.774928
ACAAAC	A-rich	0.19374	0.127033	0.260447	-0.373301	-0.813357	0.0667545	-0.358419	-1.32401	0.607173	3.03832	-0.924795	7.00144	-0.512636	-0.741133	-0.28414	1.17146	-0.142102	-1.26457	-0.224571	-1.08581	-1.00591	-0.505533	-2.34159	-0.351664	0.0174256	-2.22649	-0.257851	-1.53289	-0.530013	-1.26382	-0.189006	-1.28648	-1.5623	-0.409217	-0.494765	0	-0.791315	-0.143193	-0.0055489	-0.482401	-0.719411	-0.517121	-1.49875	-0.532662	0.156902	1.62246	0.132225	0.133018
ACAAAG	A-rich	0.112364	0.05878	0.165948	1.05587	0.807971	1.30378	0.308358	-0.122096	0.738812	4.04887	3.12585	4.97188	-0.299689	-0.518918	-0.08046	1.21837	-0.301529	-0.16586	1.45666	-0.0248944	-0.6583	0.649315	-1.33694	-0.814701	-0.335171	-0.166708	0.854227	-0.636302	-0.536662	0.0765899	2.2822	-0.879631	-0.431946	2.04688	0.648526	0.32507	0.126453	0.692696	1.92265	0.636137	0.572407	-0.598106	0.733197	0.155767	0.791519	3.92854	0.142136	1.31243
ACAAAU	A-rich	0.255659	0.177392	0.333926	0.994629	0.76489	1.22437	0.561947	0.18968	0.934214	3.73572	2.83292	4.63852	-0.558851	-0.797048	-0.320653	-0.636233	-0.725771	-0.667523	-3.05153	-3.36287	-6.47051	-1.52768	-0.614361	-5.14286	-2.11873	-2.96158	-3.01978	-2.11337	-0.430487	-1.06195	0	-0.872729	-5.74691	-2.97489	-3.02967	-1.94263	-1.23455	-3.21085	-3.83772	-2.44553	-1.80616	-1.71312	-2.23305	-3.21763	-0.737244	-0.195262	-3.32384	-1.6429
ACAACA	A-rich	0.0579635	0.000433396	0.115494	0.141786	-0.215908	0.49948	-0.30198	-0.83466	0.2307	2.38631	1.20461	3.56801	-0.17806	-0.413312	0.057191	-0.280328	-0.149342	-2.74506	-1.60869	-1.83299	-2.19189	-0.307579	-0.80306	-2.36966	-1.08801	-1.43995	-0.377432	-0.253776	-0.564729	1.31848	-0.931785	-2.47552	-0.990346	-0.826989	1.28935	-0.0538734	-0.60781	0.946897	0.10147	-0.448656	-0.0398226	-0.237666	-0.916876	0.106279	1.1843	0.731845	0.135934	0.0606175
ACCAAA	A-rich	-0.00268736	-0.0574469	0.0520722	0.0344825	-0.218829	0.287794	-0.756458	-1.54077	0.0278587	3.1107	2.02056	4.20084	0.0932317	-0.0824431	0.268906	-2.00601	-1.152	-0.274903	-0.873698	-5.17943	-1.44732	-1.25859	-0.979781	0.622348	-0.973227	-2.32555	-2.3085	-1.33655	-1.69299	-2.10486	-4.75059	-2.41404	0.0530762	-2.14222	-1.29589	-1.54389	-1.01761	0.126302	0.669984	-1.30566	-0.0307024	-0.251113	-0.354951	-1.80485	0.794891	0	3.40536	0.0878178
ACUUUU	U-rich	0.846789	0.799785	0.893792	0.745615	0.551393	0.939838	3.1693	2.87753	3.46108	2.69485	2.35229	3.0374	0.622604	0.522694	0.722514	-0.00586517	-1.38243	-0.10377	-0.800231	-0.34971	-0.701937	-1.67872	-0.843922	0.157669	0	-0.880434	-1.67237	-1.69204	-2.81504	-1.92264	-2.065	0.943228	-1.87009	-0.632118	-0.476581	0.454913	-0.497199	0.343217	0.708753	-1.98263	-0.0929496	-1.07022	-0.533863	0.186948	0.0712055	-1.24679	-0.165589	-1.08314
AGAAAA	A-rich	-0.0384579	-0.102391	0.0254751	0.624395	0.418327	0.830463	-0.649271	-1.24085	-0.0576876	3.70207	3.1611	4.24305	-0.432009	-0.643545	-0.220472	-3.08623	-2.83721	-2.67951	-1.56275	-1.67469	-2.37917	-0.956446	-3.81608	-3.62294	-0.453181	-1.89668	-0.637317	-1.23978	-2.92465	-1.81161	-3.10817	-1.11351	-2.57507	1.90831	1.81174	1.577	-0.620446	0.731953	1.57562	1.81665	-0.357197	1.50524	1.04645	0.436538	1.01006	0.313513	3.85256	2.1623
AGAAAC	A-rich	0.185933	0.144614	0.227251	0.752205	0.508006	0.996403	-0.153536	-0.851752	0.544679	4.65144	3.40843	5.89445	-0.301488	-0.507384	-0.0955925	0.0344984	-0.258228	0.539166	0.641043	2.08722	0.253316	1.00436	0.935076	-0.0307271	0.444213	3.11489	0.879118	0.84786	0.581833	0.717433	-1.17949	2.05912	0.201468	3.44393	2.7571	2.58863	2.85671	2.90834	2.613	1.44829	2.5065	0.842374	0.926214	1.115	1.14616	3.42516	2.65107	2.30938
AGAAAG	A-rich	0.17139	0.121858	0.220922	1.03193	0.75247	1.31139	0.506197	0.0908498	0.921544	3.57655	2.88821	4.2649	-0.41082	-0.639293	-0.182347	0.233233	2.01259	2.55582	2.80335	-0.703444	1.24809	2.67876	2.70153	3.78421	2.59858	4.53352	0.688751	3.66271	3.95606	5.34953	2.2095	6.45208	2.64572	3.05748	3.35781	5.41049	5.42162	7.53266	3.26024	5.87452	4.17951	1.6679	1.59431	-2.93502	4.29615	3.38724	5.19736	2.98855
AGAAGA	A-rich	0.131512	0.084005	0.179019	0.683035	0.453564	0.912505	0.020422	-0.955511	0.996355	3.31432	2.44806	4.18058	-0.301296	-0.586369	-0.0162238	11.5243	8.82203	9.66231	20.2944	16.9239	10.1835	18.0516	15.3753	8.37527	12.6951	14.551	13.7597	13.9397	10.6707	5.65001	10.2871	14.6767	9.19696	15.9955	21.7897	16.3419	19.3318	11.1294	19.9165	13.0939	14.5894	21.9606	15.0796	15.2815	19.3714	16.4863	14.1081	21.3786
AGAGAA	A-rich	0.209345	0.16507	0.253619	0.813322	0.597444	1.0292	-0.142803	-0.66079	0.375184	2.85351	1.67418	4.03284	-0.581556	-0.836427	-0.326685	0.356584	3.11171	3.28636	2.41855	2.66817	6.23571	2.9402	0.956596	4.71874	1.23773	5.64807	2.53133	1.29474	0.51578	4.82222	3.5766	4.04908	2.36381	4.05191	6.15199	6.35454	2.35627	7.60904	5.08698	3.5483	1.68303	4.61283	2.0829	4.42899	2.70804	1.58703	1.11123	5.34078
AGAGAG	Other	0.407555	0.360398	0.454712	0.27893	-0.0209833	0.578842	-0.684568	-1.53715	0.168012	3.13786	1.48538	4.79035	-0.741898	-1.00265	-0.481151	0.926318	2.86484	4.1799	2.73963	1.94446	1.91773	2.16233	2.49936	1.07333	4.10471	0.565844	3.4458	2.88713	1.78974	1.86423	1.52684	1.57512	2.46778	2.34766	2.03042	2.37931	2.20477	1.12718	4.17044	2.55105	2.6218	4.36044	3.44016	6.69049	6.1511	6.80489	3.7116	2.88596
AGUUUU	U-rich	0.69405	0.65748	0.730621	0.559321	0.401386	0.717256	3.30869	3.03137	3.58602	3.04628	2.63395	3.4586	0.826178	0.692711	0.959645	-1.64864	-1.91061	-1.78326	-3.61689	-4.81637	-0.930197	-2.18217	-1.5284	-2.37143	-0.647044	-1.3098	-1.50662	-0.590022	-0.329978	-0.118824	-2.12191	0.227589	-1.82498	-0.842476	-2.20839	-0.549266	0.509021	-1.8329	0	-0.631399	-0.0167728	0.314615	-0.406675	-0.881659	-0.24942	-2.14433	-2.05971	-0.360683
AUAAAA	A-rich	0.0610332	-0.0121773	0.134244	2.91792	2.72497	3.11087	0.71772	-0.00755825	1.443	3.64315	2.96805	4.31825	-0.355809	-0.659982	-0.0516363	-3.39357	-1.95491	-2.16797	-6.62858	0	-1.92698	-3.13659	-1.46813	-2.73703	-6.66065	-3.472	-4.50269	-6.60023	-1.68765	-5.18003	-9.54442	-4.78039	-2.92455	-5.95354	-0.718953	-2.83062	-1.66238	-6.8633	-3.01785	-7.12912	-0.917535	-1.09077	-1.45924	-1.66188	-1.27836	-3.3958	-3.21438	-1.2284
AUAAAU	A-rich	0.260303	0.191745	0.328861	2.89606	2.73238	3.05974	1.34334	0.888387	1.7983	4.69764	4.09654	5.29874	-0.191789	-0.504505	0.120927	-1.63185	-0.881596	-1.44718	0	-1.84253	-1.30529	-1.16432	-0.600071	-1.66839	-0.976066	-4.24728	-1.83797	-0.4814	-3.10007	-0.677356	-7.42073	-4.33224	0	-0.81343	0	-0.685472	-0.798919	-2.80958	0	-1.9478	-0.321777	-6.96663	-2.15313	-2.7266	-0.686971	-0.332358	-1.1904	-1.72338
AUAAUA	A-rich	0.276341	0.201134	0.351548	3.28833	3.12645	3.45021	0.211432	-0.178183	0.601047	3.69799	3.13544	4.26054	-0.336642	-0.631302	-0.0419818	0	-4.42562	-4.22379	-3.20044	-4.41106	-4.87493	-1.4079	0	-5.59992	-1.94851	-1.91384	-3.31126	-6.14034	-2.55928	0	-5.85143	0	-2.91376	-3.36784	-4.53617	-4.22306	0.434011	0	-3.38805	-1.58042	-3.93358	-3.73615	-4.97593	-2.75466	-5.27638	-0.977257	-1.123	-3.28034
AUAUAU	Other	0.466395	0.415903	0.516887	2.20705	2.08228	2.33183	0.845206	0.511217	1.1792	4.60373	4.19011	5.01736	-0.452645	-0.639224	-0.266067	-7.54013	-9.66387	-5.52611	-2.24074	-3.10566	-6.66159	-5.48397	-4.86187	-2.76829	-4.73776	-6.07	-7.23015	-6.83653	-6.22859	-3.64554	-2.4738	-3.54591	-7.0874	-3.7311	-1.13127	-2.61325	-3.25478	-2.67262	-9.63399	-0.351516	-6.42343	-2.83908	-5.61823	-1.77466	-5.51267	-1.35078	-2.92466	-0.525696
AUAUUU	U-rich	0.530475	0.482589	0.578361	1.42743	1.27878	1.57609	2.77882	2.54175	3.01589	4.91604	4.54277	5.28931	0.214697	0.0753737	0.354021	-1.39152	-0.74637	-5.76531	-6.93663	-2.50899	-7.63426	-3.64957	-5.16104	-2.64062	-6.05073	-2.25763	-2.56239	-2.4644	-4.0632	-1.55017	-2.33192	-1.91048	-3.53977	-4.49367	-0.964951	-1.84537	-1.63274	-2.42636	-2.71282	0	-2.55456	-3.84193	-8.40952	-1.72692	-2.85426	0	-0.593873	-2.17257
AUCAAA	A-rich	0.0278537	-0.0196206	0.0753281	1.66043	1.45332	1.86754	0.10912	-0.804537	1.02278	3.73264	3.11923	4.34605	0.0373876	-0.191468	0.266243	-1.84931	-4.74304	-0.433849	-4.86402	-2.01927	-4.13809	-1.93774	-2.77656	-3.55923	-2.79755	-3.84728	-2.13543	-2.22375	-1.85258	-0.140329	-2.75292	-2.92209	-0.986119	-7.38788	-4.28142	0.36807	-2.17218	-0.990465	-0.44419	-1.13031	-0.285314	-1.9895	-1.59967	-0.87666	-0.789662	-0.341031	0.17742	1.35737
AUCUUU	U-rich	0.713759	0.673812	0.753706	0.64268	0.469922	0.815437	2.73063	2.47726	2.98401	3.29901	2.95624	3.64178	1.18305	1.03169	1.33441	-1.69563	-1.97824	0.595118	-0.865247	-2.9355	-0.39614	-0.219235	-2.17019	-1.97728	-1.53417	-3.69514	-0.397812	-0.928871	-0.915766	0.820269	-0.983749	-1.308	-0.403145	-1.22868	0.377121	-0.0397462	0.405742	0.328555	-0.211998	0.133806	-1.24446	0.969501	-0.507901	-0.180395	-0.341843	-0.685053	-2.12578	-1.05165
AUGAAA	A-rich	0.325144	0.267866	0.382421	2.99116	2.81099	3.17132	0.830427	0.344817	1.31604	4.09753	3.35223	4.84282	-0.0522144	-0.372115	0.267686	-0.625069	-1.9198	-0.184961	-2.42382	-1.05602	-2.35784	-0.968914	-2.41457	-3.1279	-0.927756	-0.841642	-0.745811	-1.77378	-1.53772	-1.43159	-1.73186	0.0605124	-0.694428	0.549541	0.2317	-1.09919	-2.43196	-0.00689567	0.512477	-0.528649	-0.726978	-0.263755	-2.2693	-0.540048	1.46895	0.24708	-1.05502	-0.324253
AUGUAA	UGUA-containing	1.88828	1.80139	1.97517	1.7137	1.49362	1.93378	-1.1947	-1.75755	-0.631847	3.06524	2.01709	4.11339	-0.823359	-1.0764	-0.570317	0	-0.509316	-2.70111	-2.08878	-2.39725	-1.40893	0	-2.26206	-0.757805	-0.15778	-0.194518	-0.312244	-1.23809	-3.47863	-0.647783	-1.99626	0	0.0581894	-1.84693	-0.719241	-6.91193	-0.163	-1.68278	-2.24415	-2.4803	-0.306172	-1.90671	-1.34177	-0.0443245	-3.98121	0.257543	-1.61789	-1.79448
AUGUAU	UGUA-containing	1.68261	1.61191	1.7533	0.873697	0.708191	1.0392	-0.152373	-0.483263	0.178517	3.02571	2.35781	3.69361	-0.267596	-0.473916	-0.0612773	-2.05559	-0.879326	-0.903556	0	-0.514216	-2.12854	0.212932	-1.29844	-1.37134	-0.327768	0.785226	-0.696879	-1.6269	0.218043	-3.54591	-0.676696	-1.24146	-0.334563	-1.70333	-3.6177	0	-1.04294	-0.488438	-2.36482	-0.594946	-2.97739	-2.68914	-1.21589	-2.09757	0.0497247	-0.581317	-0.378645	-1.35944
AUGUUU	U-rich	1.01248	0.975987	1.04898	0.944019	0.825518	1.06252	3.04739	2.81462	3.28016	2.64839	2.12974	3.16705	0.8118	0.671921	0.951678	-2.26796	-1.23075	-1.73114	-1.11884	-3.03882	-1.5854	-2.48954	-1.47249	-0.627548	-1.33527	-3.37275	-1.21338	-0.393684	-2.09518	-0.576082	-2.06849	-2.134	0.44516	-1.39941	-2.98814	-1.06256	-4.81066	-2.25886	-5.33023	-1.09716	-3.52753	-3.9833	-0.768346	0.383241	-2.77688	-1.97429	-2.65456	-1.34666
AUUCUU	U-rich	0.746375	0.698192	0.794559	0.890926	0.714367	1.06748	2.8162	2.561	3.07139	3.51624	3.03173	4.00074	0.932683	0.759713	1.10565	-0.735653	-0.425182	-2.64254	-1.65036	-2.27691	0.309676	-0.622015	0.0641751	-1.67842	-1.53655	-0.513659	-3.03422	-2.56492	-0.845577	-0.47028	0.193157	-0.151422	-0.330997	-1.89143	-0.910989	-0.564797	1.37058	-0.56667	-0.342681	-0.669805	0.0286566	-1.19499	-0.487886	-0.121367	0.49244	-0.468814	-0.182772	-0.915949
AUUGAA	Other	0.457068	0.388191	0.525945	2.16543	1.97289	2.35797	0.680525	0.352931	1.00812	3.71545	3.0368	4.39411	0.171525	-0.103986	0.447037	-0.778762	-1.01695	-2.69799	-1.85813	-1.14116	-0.848183	-0.796238	-0.425161	-0.978455	-1.33438	0.989435	0.49058	-0.806658	0.942642	-2.13513	0.0337737	-0.993164	-0.688997	-0.89034	0.930356	-0.469808	-2.72812	0.098565	0.764724	0.921469	-0.543085	0.534218	-0.664455	-0.769007	0.211158	0.154349	0.909721	0.843767
AUUGUA	UGUA-containing	1.85184	1.76052	1.94316	0.730702	0.513838	0.947566	0.0999628	-0.336111	0.536036	3.14476	2.45448	3.83505	-0.321062	-0.666117	0.0239922	-1.22237	-0.491077	-0.287597	-2.94509	-0.0829159	-1.97585	-1.19229	-1.17397	0	0	-3.87044	0.0986601	0	0	-1.59007	-0.393858	-1.26047	-0.193843	-0.843048	-3.07433	-3.25701	-1.25538	-1.19609	-3.60899	-0.253225	-0.3354	-0.0386333	-4.40673	-0.767377	-0.172615	-0.804079	0.0500291	-0.197755
AUUGUU	U-rich	1.09236	1.04367	1.14104	0.796518	0.630007	0.96303	2.57267	2.32929	2.81605	3.95552	3.39836	4.51267	0.754229	0.575891	0.932568	-1.42054	-4.18715	-2.45828	-1.70289	-0.460174	-4.26675	-2.94957	0.839985	-5.09608	-4.01429	-1.00375	-4.64426	-1.96755	-0.815915	-1.2395	1.9008	-1.18356	-1.9052	0.342205	-0.241376	0.714663	-0.880306	-1.58989	-0.590072	-1.10869	-0.403637	0.393724	-0.0552463	0.394081	0.15799	-1.06942	-1.7661	-1.84232
AUUUAU	U-rich	0.50036	0.442229	0.558491	1.67092	1.52742	1.81442	1.97303	1.70715	2.23891	3.25208	2.93069	3.57347	0.0941514	-0.0549525	0.243255	-0.825828	-2.40081	-1.02764	-4.18026	0	-3.34191	-2.74418	-0.968579	-2.70728	-0.679056	-4.0342	-3.25741	-1.64105	-1.93382	-2.6191	-1.62492	-2.73338	-0.212107	-0.941093	-2.31443	-0.516043	-0.642899	0	-2.94914	-1.59951	-2.00428	0	-4.02436	-5.12117	-0.660755	-1.38447	-1.11353	0
AUUUCU	U-rich	0.622392	0.580174	0.664609	0.676856	0.518466	0.835245	2.98823	2.73828	3.23818	4.34758	3.91194	4.78321	0.929606	0.78159	1.07762	-1.47012	-0.401656	-1.73269	-0.75221	-3.09571	-1.07297	-1.55471	-3.08573	-4.63955	0.119194	-1.6086	-0.449405	-0.935159	0.434642	-1.28307	-2.55968	0.313602	-0.482616	0.205862	-1.74229	-1.54186	-0.217877	-0.668343	0.285464	-0.764081	-0.351601	-0.0351805	0.436468	-0.289181	-1.07559	-1.6371	0.0294715	-0.354956
AUUUGA	Other	0.492559	0.452158	0.53296	1.41935	1.29952	1.53918	2.34432	2.09204	2.5966	4.98863	4.46853	5.50872	0.60005	0.338194	0.861906	-1.39082	-0.490951	-1.30712	-2.70058	-3.52697	-0.764032	-2.48355	-2.16556	-1.0259	-2.43213	-0.470189	-1.3833	-0.591907	-4.95905	0.673958	-1.4301	-1.45734	-0.279473	-0.698007	-2.11086	-2.05084	-3.20587	0.747545	0.122342	-0.684503	-0.706726	-1.31848	-2.11363	-1.56676	-0.982216	-1.84921	0.160937	-1.62875
AUUUGG	Other	0.710354	0.666496	0.754211	1.03719	0.899094	1.17528	3.3378	3.01839	3.65721	5.07008	4.18717	5.95298	0.753499	0.478387	1.02861	0.397681	-0.396663	-0.264706	-0.0213937	0.295771	-2.86928	-1.04359	-0.331857	-0.576023	-0.0547886	0.805548	-0.193288	-0.662778	0.743572	-0.454959	0.724596	-0.523865	-0.469112	-0.655585	-0.658529	1.36672	1.08743	1.11666	0.350883	-1.10065	-1.24037	0.67437	-0.480333	-0.0646236	0.123365	-0.157087	-0.817306	0.807674
AUUUGU	U-rich	1.27397	1.22174	1.3262	0.778884	0.611834	0.945934	2.50447	2.23729	2.77165	5.35249	4.68678	6.0182	0.731057	0.549947	0.912166	-1.65712	-0.261115	-0.944412	-0.822632	0.624981	-1.70546	-2.08299	-1.47133	-4.88338	-3.52388	-0.643165	-3.34672	-2.74191	-1.27156	0.589594	-0.122404	-0.270972	-3.56851	-1.76187	-1.57937	-0.461865	-0.758816	-0.966019	-0.558487	-3.5411	0.899554	-3.70372	-0.668938	-1.73077	-0.281159	-0.614537	-3.43536	-0.852483
AUUUUA	U-rich	0.370915	0.32319	0.41864	1.54433	1.39675	1.69191	2.48384	2.20593	2.76175	4.22272	3.83098	4.61447	0.437941	0.271919	0.603963	-3.03857	-4.66301	-1.45953	-1.6937	-3.10161	-3.27795	-3.4103	0.2081	-1.45958	0	-3.76481	-2.91192	-0.978835	-0.313766	-2.8779	-3.07525	-1.46332	-2.49158	-1.92262	-3.6292	-1.11234	-0.711763	-3.7182	-3.88862	-1.23421	-3.60145	-1.86149	-0.813953	-2.67679	-2.86334	-0.970089	-3.32043	-1.79882
AUUUUC	U-rich	0.532287	0.494196	0.570378	0.40207	0.254758	0.549382	3.43547	3.17841	3.69252	3.93704	3.45747	4.4166	0.958978	0.819224	1.09873	-0.865683	-3.57488	-1.58458	-2.9937	-1.03449	-2.31753	-1.72808	-1.38451	-0.511015	-2.4617	-1.66475	0	-0.75116	-0.488953	0.28509	-1.6864	-0.00632027	-2.04346	-0.0976274	0.314876	-1.53324	0.193818	-0.334943	-0.628466	-0.435951	0.260105	-0.0474167	0.640773	-0.486318	0	-2.22416	0.431438	-0.742392
AUUUUG	U-rich	1.03479	0.99517	1.0744	0.896364	0.774324	1.0184	3.33364	3.12067	3.54662	4.75006	4.15992	5.3402	0.632038	0.471393	0.792683	-2.26324	-2.53182	-0.0943547	-0.342476	-0.606739	-2.28019	-2.44642	-4.23263	-1.11193	-0.548038	-1.42541	-3.02946	-2.16954	-2.39257	-3.26906	-0.120056	-3.5107	-1.45681	-5.53841	-4.34081	-0.580388	-0.101794	-2.56602	1.23554	-0.561847	-4.8065	-0.332781	-2.16769	-0.0419483	-0.303259	-0.143375	-0.682772	1.56689
AUUUUU	U-rich	0.68313	0.642698	0.723563	0.781468	0.621107	0.941828	3.41397	3.20354	3.62441	3.65669	3.31662	3.99676	0.630388	0.509929	0.750846	-0.908551	-5.08589	0.16721	-2.68069	-5.98778	-0.927638	-3.58654	-8.15708	-3.63044	-2.09141	-5.38087	-1.18057	-2.44026	-1.12988	-1.70867	-2.44759	-1.42486	-0.816871	-3.7707	-3.36118	-3.23296	-2.43657	-2.83788	0	0.36153	-3.45716	-0.049305	-2.36718	-1.12595	-3.83172	-1.84133	-3.86887	-1.63003
CAAAAA	A-rich	-0.0561196	-0.11174	-0.000498874	0.0674694	-0.216311	0.35125	-0.354052	-0.831283	0.12318	3.42074	2.57692	4.26455	-0.217732	-0.467064	0.0315999	-2.40641	-3.86592	-5.10473	-1.02088	-4.91447	-4.31089	-5.85338	-1.78033	-6.91171	-4.58157	-2.65539	-6.19657	-4.20598	-3.26343	-3.07823	-0.454839	-2.74297	-8.08935	-2.02094	-3.5722	-0.167122	-2.57915	-2.52047	-2.45517	-1.20409	-0.174819	-1.76173	-0.383332	-0.850893	-2.23119	-2.50319	-1.5347	-0.0407147
CAAAAC	A-rich	0.0524992	0.00360418	0.101394	0.297317	-0.0723546	0.666989	-1.2571	-1.90916	-0.60504	4.67011	3.27542	6.0648	-0.332444	-0.591365	-0.0735236	-1.92814	-2.07367	-1.96028	-1.32179	-1.07448	-1.43093	-1.84234	-0.876331	-2.42383	-2.69389	-1.00648	-2.86979	-1.77754	-0.770026	-1.44793	-1.81382	-0.337726	-1.38141	-1.48396	0.170258	0.134937	-0.991087	0.183879	-1.60682	-1.59059	-0.216872	-1.17757	-0.167097	0.0408032	0.171786	-0.166286	-0.0801124	0.0556044
CAAAAG	A-rich	-0.0934569	-0.141987	-0.0449267	0.715826	0.424249	1.0074	-0.0506914	-0.971932	0.87055	4.10156	2.42741	5.77571	-0.00211101	-0.301454	0.297232	-0.508885	0.463181	0.135114	0.456989	0.16007	0.173299	0.326812	0.436889	-0.9982	-1.9733	0.913809	0.00224936	-0.296098	0.874673	-0.324024	0.074778	0.419328	0.789573	-0.0188167	1.36259	1.5782	1.81043	1.20484	1.91861	1.33617	1.89955	0.183809	2.43583	0.311577	-0.529655	-0.317362	1.30806	2.26911
CAAAAU	A-rich	0.105417	0.0465752	0.164259	0.585195	0.41446	0.755931	0.498341	0.16227	0.834413	4.23337	3.51642	4.95032	-0.0963307	-0.239873	0.0472119	-1.65024	-4.33894	-0.81701	-1.02173	-8.07654	-4.3244	-3.32317	-1.3093	-1.83808	-2.42722	-2.56671	-2.24144	-1.87463	-3.57621	-1.65961	-3.9989	-4.64948	-1.71804	-2.38464	-1.5052	-0.066724	0.100623	-0.977347	-4.01597	-0.869842	-4.20857	-3.20809	-0.5814	-1.46996	-0.0743843	-1.23668	-0.198654	-1.11841
CAAACA	A-rich	0.111041	0.0588044	0.163278	0.266131	-0.0405635	0.572825	-1.16794	-1.72657	-0.609313	4.10301	3.13608	5.06994	-0.41993	-0.693125	-0.146735	-0.241332	-0.440762	-1.16508	-2.80217	-0.446438	-2.62026	-0.707004	-0.370335	-1.20356	-0.115478	-0.855752	-1.29429	-1.8869	-1.07718	-0.496548	-0.854191	-1.24417	-2.59679	-0.870501	0.32319	-0.0077759	-0.564696	1.25773	-0.5677	-1.22833	0.376014	-0.391179	-0.136454	-1.70782	-0.330508	-0.294545	-0.0433231	-0.145901
CAACAA	A-rich	0.0539274	0.0062022	0.101653	0.585155	0.31021	0.8601	-0.558135	-0.992334	-0.123936	2.7037	2.08653	3.32088	-0.36557	-0.688995	-0.0421445	-0.87456	-0.103745	-0.736813	-2.16904	-0.530586	-1.99181	-1.67295	-0.609051	-0.592274	-1.47944	-0.394296	-2.0883	-0.419391	-0.0517868	-1.29778	-0.388144	-0.540521	-0.522513	-0.284978	0.68158	0.397505	0.532177	1.21321	1.07561	0.352403	-0.536654	-1.2757	1.43195	1.79621	-0.0722295	0.24888	1.08074	0.271763
CAAUUU	Other	0.507124	0.444989	0.56926	1.22457	1.08234	1.3668	2.61735	2.32019	2.91451	5.52293	4.84293	6.20294	0.321936	0.196323	0.447549	0	-5.34148	-0.417054	-2.60295	-0.974134	-1.49814	-2.83634	-0.941108	-1.65445	-0.201921	-1.31287	-0.646136	-3.2182	0.0375479	0	-0.025558	-1.42586	-1.73171	-0.89397	-1.97668	0.15648	-1.25094	-0.266165	-0.113848	-4.15762	-0.532382	-0.785991	-1.33017	-1.87841	-0.542577	-1.79522	-0.769799	-1.1291
CACAAA	A-rich	0.026125	-0.023838	0.076088	-0.0960103	-0.368334	0.176313	-1.29588	-2.51982	-0.0719324	4.30104	3.25402	5.34807	-0.127371	-0.449663	0.19492	-2.89931	-0.504065	-1.58211	-1.17541	-1.34348	-0.840746	-0.407889	-2.15873	-0.42866	-2.23399	0	-0.634729	-0.475887	-0.562038	-1.74605	-1.14526	-2.5993	-1.29251	0.112463	-1.12935	-1.60895	-0.167929	0	-0.0213214	-0.16345	-0.468494	-0.676092	-0.545404	-0.471228	0.43613	0.0922466	-1.51546	0.155575
CAUUUU	U-rich	0.673418	0.628609	0.718226	0.544112	0.362619	0.725604	3.2282	2.97172	3.48468	4.55918	4.11424	5.00411	0.814556	0.704346	0.924766	-3.55015	-1.4751	0	-2.32372	-2.18211	-0.704263	-3.00329	-4.93829	-0.0584045	-1.01597	-0.635076	-0.740777	-1.92179	-2.83818	-1.42186	0.0263857	-0.806871	-2.10875	-1.07406	-1.46687	-1.72923	-2.18567	-0.104786	-0.82485	-0.118439	-0.324361	-1.3242	-2.77147	-1.74069	-0.460045	0.387099	0.200505	-1.66555
CCAAAA	A-rich	-0.113722	-0.163387	-0.064056	-0.278515	-0.526439	-0.0305904	-0.669507	-1.74031	0.401298	4.03222	2.99927	5.06517	-0.0598688	-0.25882	0.139082	-2.48257	-2.31541	-0.914613	-1.71981	-0.989396	-3.37296	-0.198207	-1.76512	-1.92542	0	-2.6923	-2.78069	-3.61738	-1.62361	-2.48316	-1.86194	-3.05486	-0.596923	0	-0.753896	-0.230798	-1.15938	-1.90538	0.100554	-2.35188	-2.38215	-0.659618	0	-0.514262	-1.29099	-0.119711	0.212866	-1.84017
CCUUUU	U-rich	0.723717	0.680276	0.767158	0.531804	0.289638	0.773969	2.90542	2.59081	3.22004	3.42258	3.06635	3.7788	1.17111	1.04509	1.29712	-2.35137	-0.228009	-0.648058	-0.696879	0.410499	-0.952329	-1.30005	-0.974616	-0.397979	-1.98894	0.00687756	0.724259	-0.557566	-0.601037	-1.09247	0.0642871	-0.547615	-0.0315714	-0.192557	-0.0010417	0.309304	0.899297	-1.45225	0.913108	2.1709	0	0	-0.375801	0	0	1.09217	0.249554	0.440571
CUAUUU	U-rich	0.49259	0.436174	0.549006	0.773018	0.598092	0.947945	2.52726	2.17369	2.88084	5.68863	5.20406	6.17319	0.511508	0.381947	0.641069	-1.22372	-1.09599	-0.710776	-1.07979	-0.745492	-0.397743	-2.37387	0	-0.00481072	-1.98524	0	-0.673226	0	-0.2077	-2.50505	-0.314706	-0.992741	-0.568859	0	-1.71654	-0.254384	-0.500984	-0.443511	-1.00476	-0.947359	-1.4067	0	-2.38582	0	-1.1759	-0.628284	-1.35513	-0.241245
CUCUCU	Other	0.816773	0.785342	0.848205	-0.255625	-0.490919	-0.0203312	1.35734	1.05206	1.66262	2.5913	2.37684	2.80576	1.46605	1.35519	1.57691	-0.255543	-0.433523	-0.196816	1.40664	0.72963	0.375877	0.904687	-0.310816	1.57007	1.05316	1.17703	0.36833	-0.700697	0.286539	-0.196366	0.213755	2.30086	0.730667	1.79141	2.48797	1.72914	2.27918	0.817788	2.10894	2.33974	5.39281	4.51508	2.40472	2.45866	2.69713	2.82359	3.91337	3.28923
CUCUGU	Other	1.21177	1.16122	1.26232	0.109442	-0.187551	0.406436	1.30483	1.04009	1.56956	1.72029	1.33999	2.10059	1.19438	1.03315	1.3556	0.233431	0.0283738	-0.346303	-0.0914238	0.743904	1.001	0.988785	2.05956	2.37438	0.310285	1.48239	1.08787	0.455676	0.976733	0.348558	2.23421	1.24772	0.258375	0.518941	0.541374	3.68457	0.82204	0.501959	0.353293	0.83899	1.17153	1.2151	1.37463	2.11502	2.30418	1.11781	0.544687	1.75593
CUCUUC	Other	0.497725	0.462477	0.532972	-0.16808	-0.580352	0.244192	1.75761	1.38612	2.1291	2.33279	1.98375	2.68183	1.41231	1.2934	1.53122	0.975562	1.54599	0.20818	2.80159	1.91288	1.36933	1.19615	2.7031	0.977077	0.157504	0.719192	1.50151	2.16123	1.3747	1.10202	1.61576	0.668368	1.40383	1.53242	5.49156	2.91403	2.38438	2.10008	1.16662	4.07157	2.29362	2.62758	2.91308	1.85586	2.30796	2.47574	1.74689	0.867277
CUCUUU	U-rich	0.841055	0.80451	0.8776	0.199205	0.0230385	0.375372	2.65447	2.40291	2.90604	2.6879	2.42053	2.95528	1.26525	1.17168	1.35881	-2.09662	-0.0390371	-0.580115	-0.15893	-1.36063	0.187439	-1.93364	-0.49586	0.0554432	0.148295	-0.448956	-0.697744	0.0769884	-1.23353	-0.777688	-0.0398126	0.044664	-0.379222	0.712463	2.33382	0.495113	1.31725	2.25803	2.45228	0.499607	1.63003	1.52455	1.21534	2.41134	0.73322	2.34558	2.12279	0.104083
CUGUUU	U-rich	1.06862	1.03054	1.10671	0.611324	0.386011	0.836636	3.21074	2.86527	3.55622	1.66723	1.35296	1.98149	1.25621	1.14953	1.36289	-0.383596	-0.233156	-1.18326	-0.485492	-0.854185	0.0719821	1.00196	0.680982	0.0283485	0	-0.79403	-0.820262	-0.890761	0.307924	0.500316	-0.544079	0.169506	0.172859	-0.622992	0.208274	1.21309	0.836413	0.241166	0.668301	2.06233	-0.476135	1.35327	2.40507	1.43487	3.27757	0.999435	1.79274	0.190822
CUUCUU	U-rich	0.678112	0.646147	0.710076	0.205083	0.00179093	0.408375	2.3048	2.05966	2.54993	2.67284	2.43057	2.91512	1.43614	1.33487	1.53742	-0.478486	-3.33141	0.658059	-1.10132	1.3969	2.51949	-0.239342	2.31012	0.775028	-0.176064	0.751677	0.485977	-0.205038	0.760204	0.511687	2.79565	1.5962	1.62799	2.81458	1.20309	5.46145	3.295	2.05033	1.96112	2.82528	0.853008	4.13906	2.27473	5.62479	5.54302	4.21894	3.62621	2.1033
CUUGUA	UGUA-containing	1.82555	1.74834	1.90277	0.480774	0.0313812	0.930166	0.103093	-0.44136	0.647545	3.57409	2.80733	4.34086	0.0881345	-0.122887	0.299156	-1.60892	-0.172288	-0.874785	-1.3925	-2.07332	-0.322433	-1.37325	0.133655	-1.31885	0.966669	0	0.011378	-1.13622	-0.00284221	-0.0965368	-0.568198	0.337265	-0.666384	-0.291749	0	0.261669	-0.313194	0	-0.362507	-0.770747	0.708046	0.177269	-0.0707643	0.043686	0.23148	-0.568866	0.0867031	-0.80242
CUUGUU	U-rich	1.1739	1.13739	1.2104	0.390669	0.0102043	0.771135	2.68941	2.47214	2.90668	1.97592	1.76912	2.18272	1.17784	1.09176	1.26391	-1.08661	-0.684951	0.217755	0.375877	2.33282	0.398084	-0.565617	0.127032	1.39818	0.906809	0.849458	-0.116138	0.748851	1.25997	-0.531457	-1.08271	0.0945226	-0.358821	1.20752	3.2752	4.46467	3.06433	1.84871	0.114803	0.14651	0.016892	0.707139	0.2963	1.57028	1.50346	1.26051	0.585288	0.764655
CUUUAU	U-rich	0.674498	0.620513	0.728483	1.38572	1.17537	1.59607	2.63947	2.27031	3.00863	4.00641	3.53773	4.47509	0.716203	0.576439	0.855966	-2.08584	-0.128719	-3.76973	0	-0.888149	0	-1.72239	-4.98804	-0.196564	-0.777797	-1.41644	-1.27509	-1.25663	-0.620299	-2.74947	-0.988602	0.190428	0	-0.679316	-0.10356	-0.577488	-0.406962	-1.32317	0.0989452	-0.461717	0.223091	-2.79996	-0.0332903	-1.10023	-0.575356	-1.34982	-0.091383	-0.125578
CUUUCU	U-rich	0.734348	0.699699	0.768997	0.117292	-0.103498	0.338081	2.67866	2.45855	2.89877	2.70299	2.43273	2.97324	1.27763	1.14683	1.40844	-1.05788	-1.28571	-0.484236	-0.450173	0.467597	0.577654	-1.09899	1.15906	-0.418933	-0.177426	-0.800612	-1.74874	-0.652468	0.462603	-0.855695	0.0668545	-0.608086	1.10937	0.830187	0.191936	1.85476	2.64779	-0.0620085	-0.774437	2.13141	0.170703	0.545087	1.22906	0.937315	2.90279	1.03563	1.43641	0.345293
CUUUGU	U-rich	1.42373	1.37804	1.46942	0.287481	0.0760167	0.498946	2.78696	2.56288	3.01103	2.71362	2.20764	3.21959	1.07033	0.966331	1.17433	-1.52315	-0.40336	-0.469416	-1.97319	1.23575	1.04595	1.06714	-0.201855	-0.230216	-0.388869	0.016106	0.988043	0.630113	-0.291187	-0.902636	1.61865	-2.54783	0.0769625	-0.387688	-1.23966	0.914748	1.50087	0.821167	0.412859	-0.574297	1.24662	4.0546	0.859534	-0.238986	1.30114	0.300192	1.45984	1.98564
CUUUUA	U-rich	0.516005	0.475224	0.556785	1.00803	0.831695	1.18436	2.3721	2.07953	2.66468	2.73113	2.37645	3.08581	0.672484	0.573115	0.771853	-4.07179	-2.65661	-4.17633	0	-2.55467	-0.711929	-3.89515	-1.63107	-2.80487	-1.00983	-2.49905	0	-1.17672	-2.3361	-4.56864	-2.48846	-0.233458	-2.85453	-1.40282	-2.07363	-0.333623	-0.80718	-0.462108	-0.830654	0.106678	-2.07425	-0.792481	-0.752035	-0.223947	-0.194188	-0.596001	-0.698811	-0.560037
CUUUUC	U-rich	0.644568	0.604133	0.685003	0.171205	-0.129434	0.471843	3.23074	2.86572	3.59575	2.84186	2.42546	3.25825	1.32819	1.23275	1.42362	-0.531806	-0.192354	-0.26666	0.0124119	0.0134169	0.0802101	-0.4229	-1.02017	0.144187	-1.02392	0.670463	-0.259067	-0.223829	-0.356676	0.567064	-0.579243	0.914779	1.04092	0.57303	0.897666	0.756538	2.24689	1.99639	0.463815	4.53206	0.939953	0.787525	2.53124	2.29356	0.327717	1.96023	0.815703	0
CUUUUG	U-rich	1.10248	1.06819	1.13676	0.427697	0.236553	0.61884	3.80502	3.53134	4.07871	3.44565	3.03663	3.85468	1.1241	1.04004	1.20815	-0.745507	-1.89999	0.361061	0.949335	2.37431	1.30818	3.41796	0.678537	1.27104	-0.171712	1.16537	0.661711	0.442769	1.19593	0.321696	0.425899	1.30852	0.767142	-0.288382	2.96188	0.606545	3.29982	1.73361	2.44532	2.77676	2.96275	2.06944	2.73711	1.37516	1.7361	2.67637	2.07792	2.24282
CUUUUU	U-rich	0.779257	0.747128	0.811386	0.435497	0.261596	0.609398	2.97212	2.75398	3.19025	2.71712	2.4985	2.93574	1.07385	1.00288	1.14481	-4.60468	-2.3533	-2.64111	-3.18067	-2.20475	-1.27655	0.214839	-0.244834	-4.79915	-3.73489	-1.24075	-1.68923	-0.945785	-0.0215879	-1.55524	-0.396233	-2.98353	0.63856	-0.548564	0.401648	-1.02327	-0.418467	1.40618	1.77457	2.90353	3.28345	-0.561366	1.18744	1.03347	2.85571	-0.222977	-0.123569	-0.119312
GAAAAA	A-rich	-0.00659155	-0.0641304	0.0509473	0.817915	0.609836	1.02599	0.254698	-0.289556	0.798951	4.54647	3.79233	5.3006	-0.467951	-0.65812	-0.277783	-3.83008	-4.67547	-3.42039	-0.257341	-0.998656	-2.27076	-0.781764	-0.923836	-2.29189	-3.39862	-1.43722	-1.59297	-1.52838	-1.78534	-3.40803	-1.5368	-3.04197	-1.19258	1.00398	-0.598079	-2.39923	0.386493	-0.436668	-0.577096	0.236113	0.498783	-0.456819	-0.386374	-0.0754759	-2.00036	-0.818169	1.44328	1.10839
GAAAAU	A-rich	0.110331	0.0504443	0.170218	1.24475	1.02964	1.45986	0.850676	0.313891	1.38746	5.32311	4.60914	6.03709	-0.52373	-0.701968	-0.345492	-1.81711	-1.71366	-4.11059	-3.66013	-5.47271	-1.70678	-2.72426	-1.29381	-2.94514	-1.75511	-0.532839	-0.0850264	-1.05064	-1.50541	-0.511193	-0.911543	-1.49114	-2.7604	-1.15084	0.193374	-1.64609	0.261942	-1.4976	-1.72869	-0.37904	0.394467	-0.167299	-1.47978	-1.38147	-0.531669	-0.252492	-0.329829	0.376938
GAAACA	A-rich	0.268301	0.221053	0.315549	1.07334	0.842108	1.30458	-0.0152962	-0.701756	0.671163	5.04568	3.55163	6.53973	-0.450237	-0.626895	-0.273579	-1.122	-0.929302	-0.133366	-0.529138	-0.169462	-0.0244917	0.330147	-0.0631191	-0.117323	0.0315816	0.322042	0.0317406	0.105494	-0.157311	1.2806	0.490247	2.13786	0.658727	0.149122	0.991928	3.01948	1.626	1.3253	0.279818	1.02343	0.477072	1.34707	0.867204	1.50284	1.55626	0.932298	2.50056	0.747117
GAAAGA	A-rich	0.153064	0.107095	0.199032	1.58113	1.26862	1.89364	0.674726	-0.695175	2.04463	5.28503	4.28728	6.28278	-0.560066	-0.740581	-0.379551	0.58221	0.0874891	1.68157	2.13151	3.92564	-0.324129	1.24614	0.691683	1.75982	4.36725	2.38399	2.96461	3.98327	6.56454	3.27055	2.77094	3.38582	0.671724	1.44894	4.63602	5.05587	6.38019	5.11875	5.96585	2.20349	2.99817	3.41235	3.91347	4.04535	3.18552	3.39022	4.1013	2.42886
GAACAA	A-rich	0.246562	0.192313	0.300811	1.08025	0.818352	1.34215	-0.420558	-1.03717	0.196051	2.96249	2.32832	3.59666	-0.525941	-0.771583	-0.2803	0.164259	0.114852	-0.130762	0.553626	-0.238365	-1.50425	-0.0863211	0.528271	-1.00201	0.101279	0.450265	0.384023	1.00856	-0.178778	-0.404701	2.24374	2.31959	0.0452128	1.51659	1.35091	0.130297	2.67598	1.47106	2.57916	0.899887	-0.154484	0.213954	0.745288	0.957481	0.450314	0.822092	3.23838	0.923479
GAAGAA	A-rich	0.0983336	0.0574782	0.139189	1.26976	1.02994	1.50957	0.668421	0.145135	1.19171	3.05421	2.01712	4.09131	-0.377494	-0.556465	-0.198523	5.61838	12.7127	9.54846	14.1708	20.3634	18.4106	11.0598	19.843	20.954	9.24804	19.6455	20.9036	14.1062	18.7825	16.4743	10.35	18.1948	21.4496	13.6875	25.0239	18.6065	20.4144	20.1267	13.0199	21.7783	11.7755	15.2819	24.9007	18.8959	19.9686	24.3441	10.6825	23.56
GAAUUU	Other	0.584569	0.532593	0.636545	1.48477	1.34809	1.62146	2.64628	2.37026	2.92229	6.00013	5.32293	6.67734	0.0913018	-0.0342292	0.216833	-1.09629	-3.6638	0.116523	-0.261121	0	-0.986425	0.196706	-2.9504	-0.485647	-0.793519	-1.38479	-0.980032	0.115666	-0.696764	-0.335728	-1.02093	0	0.445047	-1.42605	0.578986	-0.264	0.292157	-0.189436	-0.373951	0.408075	0.224784	-0.307067	-0.523928	-0.542216	-0.855718	-0.10706	-0.0460652	-0.611944
GACAAA	A-rich	-0.00213595	-0.0583324	0.0540605	0.407596	0.0933171	0.721875	0.102784	-0.885287	1.09085	3.99794	2.51041	5.48548	-0.414578	-0.636423	-0.192733	-0.554106	-1.10018	-0.511523	-0.240587	-1.07299	-0.599063	-0.1234	-0.0962985	-0.339063	1.02918	0.399641	-0.0145182	-0.428472	-0.735997	0.908374	-0.665648	-0.440395	0.134489	-0.703678	-0.348907	0.681305	-0.212028	0.174956	1.2316	-0.428332	-1.25612	0.520067	0.0706235	0.863327	2.54291	-0.288459	0.451875	0.226838
GAGAAA	A-rich	0.200016	0.156119	0.243913	0.565181	0.321355	0.809008	-0.593921	-1.07873	-0.109111	3.70154	2.91324	4.48983	-0.453063	-0.642461	-0.263666	-1.08999	0.107799	0.837496	2.02773	2.01863	3.20649	0.895411	1.55219	1.34057	2.79877	0.839401	3.56625	2.28073	3.0066	-0.969	3.95177	1.79149	6.96841	5.56392	3.27174	3.56252	3.96633	1.30319	5.81363	4.58632	3.19222	1.68199	1.20106	2.44118	3.28259	3.26818	4.33524	0.600773
GAGAAG	Other	0.144085	0.0802272	0.207942	0.4296	0.181099	0.678101	0.338187	-0.380371	1.05674	3.60077	1.63766	5.56387	-0.60055	-0.903042	-0.298058	9.04558	11.0155	11.5478	7.54141	10.0443	6.53564	15.4288	10.6742	12.7637	14.696	7.2077	18.775	12.1139	9.95943	6.77	7.95591	6.44283	11.0147	9.00734	11.5767	12.172	11.4693	10.4585	10.6666	7.93699	8.30548	14.1856	16.934	8.60765	7.78867	7.48588	11.7887	5.42059
GAGAGA	Other	0.361584	0.314734	0.408433	0.36829	0.0348692	0.701711	-0.778829	-1.5459	-0.0117597	2.14081	0.673218	3.6084	-1.02246	-1.30571	-0.7392	0.26769	1.88566	0.967306	4.53286	5.57756	0.535486	1.86757	2.66538	0.970327	0.982745	2.40375	2.82263	1.1748	1.32379	3.60302	3.18747	5.33852	3.96865	3.03576	4.73393	0.992375	1.97899	4.28634	1.01609	0.508248	2.95244	3.07078	4.99052	4.99346	4.42755	5.51564	3.0332	3.3911
GAUUUG	Other	0.801281	0.757874	0.844688	0.703728	0.547239	0.860217	2.98273	2.66225	3.30321	4.59312	3.77669	5.40955	0.4233	0.290268	0.556332	-4.84957	-0.536317	-0.662093	0.828007	-1.56248	-1.07242	1.07638	1.2068	0.579978	0.33967	-1.30931	0.294476	0.447273	2.80764	-0.150556	-0.292446	0.581165	0.224101	-0.0522214	2.16128	1.17387	-0.0607755	0.796411	0.232072	0.697632	0.905465	1.38034	-0.00437675	0.0263323	0.219484	-1.14207	-0.0572504	0.438836
GAUUUU	U-rich	0.74729	0.70936	0.785221	0.91289	0.787492	1.03829	3.4445	3.22807	3.66094	3.5623	3.04869	4.07591	0.566724	0.463821	0.669627	-3.25679	-1.97383	-2.66071	-1.99365	0.173808	-2.57209	-0.616332	0.29084	-0.488	-2.11468	-2.7339	-1.00581	-1.5226	0.324315	-1.71132	-0.456507	-1.40896	-1.03761	-2.12686	1.06536	0.594622	-0.220219	1.78555	0.140609	-1.73242	1.09248	-0.377269	1.05118	-0.00105932	-0.764051	-1.2303	-0.199911	-1.37871
GCUUUU	U-rich	0.789258	0.74824	0.830277	0.353234	0.121066	0.585403	3.21942	2.8742	3.56465	3.55338	2.98603	4.12074	1.22547	1.12259	1.32835	-0.700328	-1.10183	-0.839704	-0.260937	0.753205	0.948204	0.219202	-1.90484	0.182813	1.37141	-0.551876	0.436765	1.74373	-0.942196	0.158859	0.0983875	1.47151	0.273669	1.24304	0.829427	2.44679	2.41388	1.72004	3.09264	2.97189	1.09325	1.60025	1.58557	1.1153	1.5668	-0.115832	-0.539409	0.192433
GGUUAU	Other	0.549897	0.499844	0.599951	1.24767	1.06686	1.42847	2.50155	2.14516	2.85793	6.28425	5.72645	6.84204	0.391106	0.261565	0.520646	-1.0989	-0.245269	-1.44689	0.091515	-1.741	-0.786998	0.230501	-0.147536	0.218428	-0.329655	-0.240945	-0.101683	-0.287609	0.311675	-0.0208347	0.134755	0.0934414	0.348482	-0.50451	-0.933617	-0.40118	-0.207249	0.347965	1.3405	1.07083	0.01019	0.13896	0.0884789	0.200353	0.376637	-0.0991799	-0.018365	-0.224833
GGUUUU	U-rich	0.857587	0.820629	0.894545	0.776285	0.60569	0.94688	3.48327	3.25096	3.71559	2.89722	2.48033	3.31411	1.12157	1.00567	1.23747	-3.99359	-0.240959	-0.94512	-0.638074	-0.670265	1.85897	1.29159	1.83963	1.27126	0.344266	-0.37543	-0.327129	0.0392403	0.0758345	2.28872	-0.137738	4.17494	4.93768	0.567232	2.95625	1.85156	3.18721	4.10632	-0.0578049	-0.256121	0.473611	1.20629	0.942377	1.88811	2.70135	2.38058	0.00548534	-0.77576
GUAUUU	U-rich	1.26999	1.19943	1.34055	0.799489	0.593524	1.00545	2.12926	1.74678	2.51175	5.75258	5.14842	6.35673	0.28394	0.125604	0.442275	-0.637538	-1.68945	0	-0.840992	-0.560815	-4.59725	-0.398996	-2.09501	-0.968907	-0.82817	-2.03961	-0.858078	-1.02891	-0.955328	0.191234	-1.79694	-1.23295	0.178731	0.141862	-0.560669	-0.194667	-3.07454	0.187228	-4.27023	-0.576093	-0.794729	-0.908989	1.00695	-1.56105	-1.5781	0.142456	-0.131932	-0.675383
GUCUUU	U-rich	0.959464	0.915884	1.00304	0.178017	-0.0482412	0.404275	2.37141	2.03704	2.70579	3.78151	3.28728	4.27574	1.26985	1.14357	1.39612	-1.19053	0.132143	-0.5141	-0.443385	0.944572	0.297815	-2.60941	-3.18508	0	-0.750679	0.0418653	0.0749816	-0.673383	-0.373576	0.35486	0.747409	0.33431	0.0339069	0.836146	0.519329	0.361011	0.907195	-0.0286424	0.158156	0.929527	1.33377	0.624116	1.95097	2.32595	0.438464	0.217918	1.10694	-0.661691
GUGUGU	Other	1.35275	1.31085	1.39466	0.290367	0.0998719	0.480863	1.98892	1.73497	2.24287	2.36327	1.65846	3.06808	0.964981	0.773122	1.15684	0.291937	0.234286	0.148318	0.891642	1.50416	-0.0765703	1.61815	0.324119	1.13327	-0.274212	1.24058	1.59876	0.433335	1.91636	2.3674	2.85807	-0.101618	2.08759	0.875793	1.69771	0.573915	-0.161071	2.93959	1.02051	-0.614375	2.36095	-0.539509	0.957	-0.108235	1.05206	-1.03817	0.271949	-0.23875
GUGUUU	U-rich	1.1804	1.14283	1.21797	0.459392	0.268597	0.650187	3.26886	3.02386	3.51386	2.75618	2.42753	3.08483	1.18642	1.06332	1.30952	-0.0121211	0.457363	-1.58169	-0.0622275	-0.194402	-0.086236	0.67598	0.205261	1.4889	1.46336	0.226203	1.39748	0.886327	-0.795196	1.48871	0.721199	1.92231	1.28659	-0.329629	2.95902	2.49981	3.59605	2.27278	1.49559	0.393285	1.17593	1.87282	0.343157	1.67064	2.21879	0.222533	0.799089	-0.14962
GUUAUU	U-rich	0.733323	0.679648	0.786998	1.32704	1.14587	1.5082	2.53872	2.27168	2.80576	6.16375	5.72459	6.60292	0.5371	0.429218	0.644982	-3.53687	0	-2.69149	-3.16138	-0.153773	-4.84362	-2.64047	0	-0.60342	-0.154446	-3.66492	-0.558637	-1.38382	-1.60597	-1.01413	-0.357152	-0.856647	-3.85256	0.139994	0.0320991	-0.953936	-0.217166	-4.85991	-1.28271	-1.89609	-0.504954	-1.33818	-0.668398	-0.75829	0.147766	-0.219211	-2.39091	-1.7384
GUUCUU	U-rich	0.926116	0.885339	0.966892	0.367195	0.130921	0.603469	3.00638	2.73247	3.2803	2.6725	2.31312	3.03188	1.28531	1.17024	1.40038	-2.19581	-0.20615	-0.364118	6.91612	-0.546336	2.19762	1.54583	0.947717	-0.872441	0.901431	0.340357	-1.12634	0.854487	1.91813	2.27336	0	3.04392	2.13626	1.74076	1.05004	1.81345	3.98462	3.23153	5.18056	3.21789	4.53602	3.34367	1.9823	0.549164	1.41077	2.23903	0.699611	0.923913
GUUGUA	UGUA-containing	2.02011	1.94325	2.09697	0.292099	-0.0611902	0.645388	0.658079	0.194076	1.12208	3.75802	2.95677	4.55926	0.00964891	-0.226622	0.24592	-1.39627	-0.645722	0	-0.906721	-0.644926	0.0723915	-0.451683	1.01748	1.05322	0.199993	1.30292	-1.23445	-1.01985	-1.40279	-1.72858	0.909369	0.393494	0.265321	0	-0.394131	-1.25353	-1.0552	0.412707	-0.163656	0.0413794	-0.527645	0.334307	1.77782	0.81638	-0.511305	-0.785941	-0.613707	-0.20956
GUUGUU	U-rich	1.26846	1.2321	1.30482	0.326386	0.127038	0.525733	2.92296	2.66914	3.17678	1.63164	1.22825	2.03503	1.03033	0.922446	1.13821	-1.24133	-1.40999	-2.76724	0.881184	-0.294442	-0.136576	1.95007	0.699158	-0.272605	0.876997	0.397611	0.807791	0.386215	2.47769	-0.165049	1.48517	1.09394	1.53689	1.08698	1.57473	1.56926	3.10291	2.12036	1.61999	3.20277	1.85336	0.42064	3.38705	0.889379	-0.369025	1.72071	0.639529	-0.717369
GUUUAU	U-rich	0.709394	0.666566	0.752223	1.53603	1.34181	1.73024	2.65517	2.36623	2.94411	4.45549	4.10493	4.80605	0.530609	0.400411	0.660806	-4.35115	-2.74997	-1.6028	-1.92396	-5.4687	-2.96308	-2.18954	-1.35484	-1.63356	-0.81605	-4.10201	-3.06002	-1.43093	-4.21985	-2.95147	0.159471	-2.99373	-0.30333	-1.03602	-0.319563	-4.81171	-3.04281	-0.472127	-1.69863	0.732594	-0.537083	-0.111251	-1.09716	-0.233048	-0.707892	-0.0497822	-2.00261	-0.48908
GUUUCA	Other	0.650622	0.616317	0.684926	0.701534	0.530232	0.872837	2.93086	2.54924	3.31248	4.08524	3.51328	4.6572	1.10538	0.996867	1.21388	-0.710094	0.0446914	-0.677214	-0.15251	-0.179324	0.410642	0.884279	-0.208253	1.85593	0.326588	-0.699871	0.998627	-0.984453	-0.834174	1.72809	0.804569	0.0659439	0.157171	-0.243535	0.060706	0.369945	2.61041	0.531097	1.78416	0.546312	2.24397	0.805985	1.86651	0.461392	-0.100881	0.81888	0.818064	0.117976
GUUUCU	U-rich	1.01019	0.976646	1.04374	0.256114	0.087295	0.424933	3.174	2.94592	3.40209	2.1275	1.75211	2.50289	1.21096	1.10808	1.31384	-3.18297	-1.55112	-0.0238252	-1.96449	0.0154024	-1.79219	2.18335	1.96692	-0.993414	0.318142	1.83554	-0.465687	-2.92922	0.272544	1.33827	1.58837	0.0525569	0.928758	2.47722	2.46148	-0.418225	-2.15511	4.03358	1.21616	1.5637	1.07474	2.65325	-0.654102	3.08032	3.38017	3.56071	1.84191	1.77248
GUUUGG	Other	0.925473	0.889135	0.961811	0.39638	0.232352	0.560408	3.56477	3.24598	3.88356	1.13874	0.564806	1.71268	0.902198	0.760666	1.04373	1.4087	0.258576	1.90781	1.60134	1.53909	1.45876	3.50635	1.32645	1.40221	1.32639	2.21498	2.40194	1.04928	2.25983	3.57723	2.36495	2.06975	1.54277	1.42128	2.27085	-0.00622974	2.47812	1.7258	2.37834	1.29161	3.19678	2.71572	0.357899	3.00383	2.34795	0.747458	3.09391	0.643385
GUUUGU	U-rich	1.38401	1.34547	1.42256	0.287158	0.104407	0.46991	2.98343	2.76341	3.20345	1.2374	0.545981	1.92883	0.957968	0.852213	1.06372	-0.631587	-1.84343	-0.00106821	0.156195	-0.979222	0.0805025	-1.10646	0.067162	1.78629	-0.813192	1.93748	-0.195819	-0.291216	0.908948	0.728048	2.1541	0.222084	0.984522	2.12356	0.36161	1.80552	3.09329	1.35767	4.63561	2.00625	2.47057	0.759743	3.13418	-2.08213	1.42639	0.396214	-0.885379	0.348715
GUUUUA	U-rich	0.688019	0.64866	0.727377	1.16848	0.967638	1.36932	2.90142	2.60881	3.19402	3.52693	3.10777	3.9461	0.68518	0.569409	0.800951	-4.1178	-1.41275	-1.723	-2.79266	-2.39204	-4.26973	-1.42325	-1.33242	-1.20896	-0.615427	0.0743958	-1.91017	-2.16892	-2.64866	-1.76729	-1.20133	-2.72432	-1.77922	-3.44413	-1.96423	-1.38534	-1.78017	-0.0753732	-1.91361	-1.9227	-0.846036	0.150942	0.526777	-0.609382	0.191271	1.43614	-4.86445	-1.24635
GUUUUC	U-rich	0.813046	0.777953	0.848138	0.0411928	-0.11173	0.194116	3.29359	2.99771	3.58947	1.88261	1.38111	2.38411	1.11339	1.01147	1.21531	-0.501528	-0.896192	-0.300015	0.391744	-0.230346	-0.430079	-1.00307	0.0643026	1.01077	-0.269528	0.765066	-0.00629975	-0.43532	-0.07379	0.00272063	-0.215144	0.671383	1.32931	1.4487	2.0354	0.935373	2.91218	0.526909	2.66982	1.46901	1.51988	0.641472	0.170468	0.488507	-0.317171	1.11245	3.34826	0.801624
GUUUUG	U-rich	1.15999	1.12636	1.19363	0.47321	0.284021	0.6624	3.52016	3.29744	3.74288	1.68635	1.33556	2.03714	0.966464	0.881651	1.05128	-1.03753	-2.67096	-2.35133	1.58238	0.845407	1.34342	0.535584	0.583503	2.4698	2.08172	1.05278	1.41016	0.180281	0.98497	0.326199	0.739299	0.864356	1.09811	2.67756	0.50068	3.34669	2.53073	3.46698	2.55775	0.72327	-2.25898	1.23344	2.13283	1.1811	1.89207	1.97197	0.864023	0.0106017
GUUUUU	U-rich	1.00608	0.97404	1.03813	0.56997	0.381899	0.758041	3.29721	3.09366	3.50077	3.15519	2.85447	3.45592	1.04903	0.97011	1.12795	-1.11102	-4.70117	-0.853878	-3.43612	-3.05936	-3.79361	-4.02398	-2.72245	-1.32565	-0.166645	-1.04387	-2.81788	-3.44696	-0.0833098	-2.1461	-1.91477	-1.18938	-0.456892	-0.148011	-1.02585	0.0144729	-1.41892	0.0607754	0.148226	-0.354651	-1.18297	1.08057	1.97098	0.919779	0.851059	-0.265941	0.190705	-2.25821
UAAAAA	A-rich	0.237563	0.154095	0.321032	1.46638	1.2215	1.71127	0.405755	-0.162957	0.974466	4.16203	3.55212	4.77194	-0.504295	-0.728423	-0.280168	-2.63037	-4.24395	-3.94485	0	-10.6083	-6.25303	-6.24689	-3.66027	-5.34017	-9.84327	-5.87333	-3.46245	-9.77734	-3.6765	-4.77944	-4.99768	-6.40653	-5.21762	-3.64474	-4.7353	-3.96257	-4.13458	-7.63404	-11.0173	-0.916258	-1.52012	-2.13028	-3.63752	-4.58814	-2.65037	-4.75727	-1.84976	-2.36062
UAAUAA	A-rich	0.501822	0.407394	0.59625	3.35981	3.21315	3.50646	0.25127	-0.286239	0.788779	4.38697	3.70947	5.06446	-0.605284	-0.90615	-0.304418	-5.46275	-1.58608	-1.14679	-3.41193	-4.39054	-2.8983	-3.78187	-4.86353	-3.83623	-1.65805	-1.72585	-1.25162	-5.43595	-8.09521	-1.51624	0	-4.63995	0	-2.06406	-4.88965	-3.10118	-5.1873	-1.52911	0	-7.92786	-1.12907	-5.32347	-6.20955	-3.36317	-2.7655	-4.55816	-1.90684	-3.10039
UAAUGU	Other	1.33804	1.25798	1.4181	1.74039	1.59664	1.88414	1.55943	1.26523	1.85363	4.85938	4.01815	5.70061	-0.234226	-0.381594	-0.0868573	-0.620824	-2.01379	-2.40302	-0.766549	-1.04975	-1.28242	-1.02591	0.286779	-0.544873	-0.509551	0	-1.51179	-1.84353	-0.16644	-0.321481	-1.14817	-1.85834	-4.00909	-2.19482	-3.20496	-1.06441	-2.79271	-3.16607	-2.12548	-2.78535	-1.59722	-1.80099	-0.824712	-1.84248	-3.93667	-0.0721137	-1.39145	-0.330458
UAAUUU	U-rich	0.692267	0.623379	0.761156	1.43397	1.29346	1.57449	2.08711	1.79624	2.37798	5.39326	4.98876	5.79776	-0.0778289	-0.217921	0.0622632	-2.75779	-2.25216	-3.32354	-0.260908	-9.08982	-9.86814	-0.168851	-4.36997	-4.22012	-1.98839	-1.36665	-0.495368	-3.49994	-2.55066	-3.95306	-1.84093	-1.7255	-3.31702	-3.32943	-0.379129	-3.86949	0	-0.811398	-2.13653	-2.27217	-1.78563	-1.7041	-2.76636	-1.0654	-2.82093	0	-0.797719	-2.9312
UACAAA	A-rich	0.437235	0.345088	0.529382	1.28039	0.911607	1.64916	0.524371	-0.0777778	1.12652	4.89007	4.37846	5.40167	-0.146682	-0.328342	0.0349778	-0.368049	-0.373284	-1.46278	-2.29901	-2.92599	-2.33384	-3.73246	-2.26212	-2.34505	0	-1.34146	0	-0.293742	-1.58808	0.35798	-0.655877	-0.977814	-0.466035	-0.119016	-1.23617	-1.70579	-0.298784	-0.827312	-1.40862	-1.07318	-0.958757	-0.388495	-1.03974	-0.261314	-0.191448	-0.299046	-0.721875	0
UACUUU	U-rich	0.836669	0.783391	0.889948	0.651182	0.451317	0.851047	2.2745	1.98637	2.56263	4.07915	3.67375	4.48456	0.517774	0.399314	0.636234	-0.357049	-2.45071	0	-1.0853	-1.30967	-3.59278	-1.6579	-1.81816	0	-2.00565	-2.28368	-2.46301	-2.82826	-1.06197	-2.83255	0.203645	-2.14236	-0.54439	-0.3099	-0.931384	-1.35349	-1.65821	0.202786	-0.427053	0.0623969	-1.77175	0	0.256583	-0.809501	-1.00103	-0.401745	-0.50658	0.375962
UAUAAU	Other	0.664724	0.581016	0.748432	2.73538	2.56459	2.90617	0.921248	0.559964	1.28253	4.24865	3.67359	4.82371	-0.256463	-0.453087	-0.0598386	-2.85547	-2.63734	-3.30926	-3.8185	-3.30948	0	-0.592078	-3.11384	-1.43407	0	-1.68864	-1.17088	-2.12204	-0.884828	-2.62207	-0.911446	-3.2242	-1.24842	-3.54699	-1.87266	-3.04925	0	-1.64967	-1.21487	-4.04503	-0.525801	-2.73806	-1.06792	-2.49379	-1.79	0	-0.797425	-0.73128
UAUAUA	Other	0.475304	0.421159	0.529448	2.32567	2.18768	2.46365	-0.0699787	-0.368811	0.228854	5.02994	4.64573	5.41414	-0.415102	-0.585319	-0.244886	-3.97255	-3.69268	-6.56649	-4.45601	-3.85762	-2.8268	-7.09736	-1.76286	-4.81962	-4.44501	-5.43558	-3.66526	-2.85445	-4.26327	-3.97182	-4.69455	-4.50943	-4.39025	-6.09306	-1.6921	-1.18139	-2.48473	-5.08092	-5.8559	-10.9074	-1.09338	-3.22905	-3.54441	-1.29452	0	-3.49218	-1.95084	-0.527114
UAUAUU	U-rich	0.66249	0.594569	0.73041	1.70477	1.56043	1.8491	1.89712	1.65596	2.13828	4.3974	4.01009	4.78471	0.202005	0.025989	0.37802	-1.24638	-5.68306	-6.11742	-2.78282	-1.9064	-1.78134	-3.81205	-4.17219	-2.9149	-1.82106	-0.945205	-3.44669	0	-0.916846	-2.96735	-0.309091	-2.00132	-3.39477	-1.44044	-1.05187	-1.48762	-4.05121	-2.25344	-0.579111	-0.613261	-2.62671	-3.76952	-1.11724	-2.76372	0	-3.34845	-1.27135	-3.35468
UAUCUU	U-rich	0.663743	0.619455	0.708032	0.586908	0.428019	0.745796	2.10426	1.83124	2.37728	3.50312	3.15968	3.84656	0.776537	0.661622	0.891452	-0.300589	-0.157102	-0.260579	-0.750209	-2.4279	-1.54711	-0.519604	-0.72481	-2.81347	-0.837736	-0.888884	-0.624698	-1.44913	-0.645744	-1.61607	-0.822632	-2.34355	-2.05743	-0.0382752	-4.27793	0.193725	-2.7895	-0.428582	-2.50803	0.0295384	0.556258	-0.181981	0.1952	-1.55565	0.105669	-1.66422	-2.25588	-0.445619
UAUGUA	UGUA-containing	1.74915	1.67583	1.82247	0.754522	0.581382	0.927661	-1.07527	-1.42806	-0.722477	3.21377	2.63841	3.78912	-0.524047	-0.707818	-0.340276	-0.501482	-0.207695	-1.96279	-0.601488	-4.50841	-1.41493	-2.6657	-1.39813	0.0436198	0	-2.78461	-1.30972	-4.3452	-0.727312	-1.73768	0.0827248	-0.487339	-2.72848	-2.32862	-3.31491	-1.67197	-0.407821	-1.39137	-0.291893	-2.81054	-1.38015	-1.33585	-2.35185	-1.97538	-0.405434	-0.543578	-2.68932	0.335882
UAUGUU	U-rich	1.0318	0.988964	1.07463	0.982541	0.867621	1.09746	2.10276	1.89213	2.31338	3.85132	3.42847	4.27416	0.518265	0.376244	0.660286	-0.628975	-2.87756	-1.44734	-2.62131	-2.67565	-4.07603	-0.942587	-1.27461	-0.940676	-2.91348	-1.81263	-2.13549	-2.69061	-1.96655	-1.98368	-3.64564	-4.83725	-0.247901	-2.96759	-1.43429	-1.67324	-0.318939	-5.78809	-1.94499	-2.05652	-0.941544	-4.24799	0	-2.0285	-1.57591	-1.90265	-1.23067	-1.75946
UAUUCU	U-rich	0.811658	0.749362	0.873954	0.977423	0.790875	1.16397	2.65557	2.35539	2.95576	4.7617	4.12479	5.39862	0.603848	0.451471	0.756225	-0.0594699	-1.63396	-0.558902	-0.480532	-0.478157	-1.09349	-1.22586	-1.40715	-1.00205	2.00899	-0.954041	-0.559257	-0.120122	-0.767528	-0.465434	-0.51954	0.125445	-1.69875	-0.479997	-0.516487	-0.230674	-2.83275	-0.377977	-0.176999	-0.592807	0	-1.79107	-1.23627	-0.993388	-0.332388	-0.909074	-1.36395	0.100187
UAUUGU	U-rich	1.30598	1.23841	1.37355	0.652612	0.454034	0.851189	2.08944	1.84373	2.33516	4.65313	4.08912	5.21714	0.228651	0.0511159	0.406186	-0.69128	-0.821937	-1.89792	-1.14948	-5.34588	-2.49666	0.203282	-1.56391	-1.29611	-0.885168	-0.477481	-0.660042	-0.339597	-1.97768	-0.433651	-2.46198	-2.18341	-1.30431	-1.92376	-1.06379	-0.752237	-1.57072	-2.04494	-1.27189	-1.02645	-1.90711	-1.25345	-0.257802	-1.5501	-0.239654	-1.76809	-0.585187	-0.892124
UAUUUC	U-rich	0.513737	0.462728	0.564745	0.695501	0.512521	0.87848	2.57564	2.30454	2.84674	4.87392	4.42759	5.32025	0.522051	0.405033	0.639068	-0.188806	-2.80123	0	-1.66366	-0.348905	-0.110095	-1.26948	-4.69202	-2.3083	-0.571872	-2.44642	0	-2.52592	-0.0973883	-2.243	-2.05706	-1.50655	-1.50961	-0.588262	-2.51469	-0.325587	-2.02885	-1.16546	-0.410612	-1.11473	0.00802276	0	-1.88843	-4.78141	-0.570771	-1.47006	-0.781811	-0.446121
UAUUUG	U-rich	0.929988	0.874549	0.985427	1.09662	0.94888	1.24437	2.80669	2.51281	3.10056	5.94836	5.47249	6.42423	0.288461	0.156007	0.420915	-0.754333	-0.6249	-1.06716	-0.421559	-2.20901	-3.65253	-4.44333	-2.61353	-2.53685	-0.0760873	-3.74083	0.0477041	-0.540694	-0.504803	-1.22343	-0.0314271	-1.25133	-0.719708	-2.68056	-0.952346	-0.812157	-1.29553	-0.989694	-2.03443	-1.36399	0	-1.16529	-2.99709	0.553867	-0.665064	-1.84186	-1.41091	-2.53716
UAUUUU	U-rich	0.742846	0.6965	0.789192	0.820216	0.675268	0.965164	3.03216	2.81615	3.24816	4.79559	4.44817	5.14302	0.366864	0.281615	0.452112	-7.86961	-0.116976	-3.02433	-5.56457	-8.21686	-3.32961	-9.39442	-0.748813	-3.93846	-4.44646	-0.635095	-3.55034	-1.33744	-3.30436	-3.0745	-4.96106	-3.52066	-5.27763	-4.90743	-1.40209	-2.06892	-0.661498	-3.61382	-0.138619	-11.6214	-1.0553	-2.80812	-1.25727	-2.27426	-1.83907	-1.91924	-0.668009	-2.94905
UCAAAA	A-rich	0.0389902	-0.00992752	0.0879079	0.784024	0.568169	0.999879	-0.710143	-1.2116	-0.208687	5.07817	4.40117	5.75517	0.0973179	-0.0755846	0.27022	-1.94099	-2.90942	-0.706457	-4.73374	-2.89452	-5.8211	-2.37808	-3.89357	-5.50116	-5.07045	-3.57882	-2.75689	-1.78032	-3.16649	-2.01029	-1.66036	-3.94568	-1.68018	-2.90733	0.448413	-5.07012	-1.5086	-3.64264	-1.29883	-1.04619	-2.193	0.804817	-1.58448	-0.485632	-1.64206	-0.169022	-0.670074	-0.573793
UCAUUU	U-rich	0.582425	0.537561	0.627289	0.574921	0.388555	0.761287	2.35092	2.08896	2.61288	5.24255	4.82447	5.66063	0.876928	0.778123	0.975732	-3.02463	-0.328521	-1.05451	-0.991479	-1.28815	-1.47927	-3.17708	-1.80071	-2.54833	-0.584412	2.0299	-3.47329	-1.88923	-1.36959	-0.777756	-0.893745	-1.33871	-1.45244	0.68699	-3.3933	-1.76189	-1.22277	0.493146	-1.54522	-0.659022	-0.847413	0	-0.969002	-0.591602	-0.321217	0.125791	-1.18091	-1.80012
UCUCUC	Other	0.782178	0.751291	0.813065	-0.368778	-0.623182	-0.114373	1.44075	1.0878	1.79371	2.59359	2.28848	2.89869	1.51254	1.38993	1.63516	0	-0.440775	1.26196	0.0548445	0.0488763	0.533502	-0.0848472	0.224658	1.48214	1.29984	-0.612574	-0.0515498	0.41473	-1.64239	0.194222	0.325202	0.710307	0.313256	1.65123	0.767088	1.66832	1.57119	1.4908	1.64113	5.0033	3.51276	2.44645	1.59173	3.25878	1.42502	2.76663	1.83735	1.60565
UCUCUG	Other	1.04958	1.00188	1.09728	0.0741518	-0.169307	0.317611	1.69339	1.33715	2.04963	1.94281	1.63923	2.24638	1.33386	1.16643	1.5013	0.288714	2.06821	0.778678	0.218834	4.22583	2.3558	2.7752	4.79966	2.21821	3.43876	3.67277	1.02818	1.10445	2.13931	2.8672	0.385076	1.65063	2.44726	1.48671	3.27702	5.08406	4.29986	1.15911	2.18156	1.50294	2.28817	4.35047	4.77932	2.75848	1.91784	1.75119	4.41353	3.09433
UCUCUU	U-rich	0.922798	0.888706	0.95689	0.203821	0.0261528	0.38149	2.25158	2.03591	2.46725	2.88635	2.67844	3.09425	1.54224	1.44975	1.63472	-0.149008	-0.39562	-0.480419	-1.83462	0.820635	1.161	-1.88563	1.25773	0.127729	-0.542838	0.962475	0.720377	-0.24994	-0.969614	0.177255	-0.669119	0.828046	1.8172	4.39044	2.91262	1.99053	-0.15902	1.54385	3.7316	2.1181	4.14666	3.68434	1.48196	3.74279	2.25335	7.03301	1.19849	3.1368
UCUGUU	U-rich	1.16618	1.12969	1.20267	0.40884	0.217359	0.600321	2.58663	2.30168	2.87159	2.19137	1.71884	2.6639	1.36576	1.25944	1.47207	-0.2023	0.141888	0.293105	-1.17197	0.43445	-0.940449	0.631266	0.625445	-2.90796	-0.424735	-0.0416082	0.15024	1.8915	-0.0298813	1.46301	-0.153733	0.950886	0.481479	-1.23502	0.16885	1.08497	4.1425	1.70133	2.00821	0	1.47023	2.64714	3.31515	2.61184	1.22709	3.15639	1.67659	1.21554
UCUUAU	U-rich	0.69312	0.644929	0.741311	1.16085	1.0061	1.3156	1.99866	1.70102	2.2963	4.03629	3.60085	4.47174	0.799577	0.703242	0.895912	-0.434525	-0.650153	-0.684787	-3.74103	-3.42817	-3.33969	-1.67403	-2.41115	-0.817099	-0.558414	-0.712039	-0.168773	-2.31402	-0.521004	-1.12015	-3.91215	-0.305239	0.0368911	0	-1.48358	-2.68138	-2.38322	-1.05182	-0.813501	-0.484826	0.135612	-0.406296	-0.835639	-0.206219	-0.892965	0.470519	-1.79453	-0.48258
UCUUCA	Other	0.272398	0.239338	0.305458	0.445453	0.239543	0.651363	1.77587	1.39052	2.16122	4.06351	3.56887	4.55815	1.33211	1.223	1.44122	0.870483	-0.217132	1.324	0.295975	1.48428	0.525577	1.01256	0.487148	0.0231876	0.505817	0.831362	-0.60529	0.0743423	1.61135	0.187072	-0.195904	1.35477	-0.566743	1.56735	0.603669	3.10343	1.54256	2.33504	1.70687	2.15846	1.59052	3.69883	2.30038	1.79569	0.80129	0.0858291	2.38627	1.95196
UCUUCU	U-rich	0.720135	0.689337	0.750933	0.0789262	-0.103165	0.261018	2.32289	2.12419	2.52159	2.74098	2.55003	2.93193	1.56733	1.47468	1.65999	-1.77578	0.189358	1.0933	0.498286	2.6466	0.192466	2.6197	0.21468	1.6202	0.739647	0.500496	-1.52305	0.189832	0.479541	1.2637	2.54967	2.73028	1.07256	1.36046	4.12011	3.00538	3.32345	2.99997	5.35789	2.63204	6.96866	3.14341	5.00115	5.54443	3.348	7.05147	3.56886	1.73849
UCUUGU	U-rich	1.47323	1.43023	1.51622	0.587464	0.312744	0.862184	2.62247	2.39954	2.84541	2.15584	1.85292	2.45875	1.21058	1.12056	1.30059	-1.02194	0.244512	-2.34598	0.604165	-0.470673	-0.817247	0.204312	0.730823	1.19963	0.952067	1.28482	-0.394119	0.438895	-0.0773128	-0.0293713	-2.1686	1.06551	0.601921	0.630783	3.63	2.92809	0.192049	0.312433	1.19464	1.82687	1.19352	0.429856	0.593154	5.33866	0.468155	3.30871	2.17671	1.87482
UCUUUA	U-rich	0.606493	0.563018	0.649968	1.12009	0.928326	1.31186	2.20548	1.87146	2.5395	3.43179	3.1048	3.75878	0.898049	0.790549	1.00555	-0.756145	-1.63354	-0.948186	-1.1015	-0.0596941	-1.98448	-1.6593	-1.8058	-1.58392	-0.249057	-0.957842	-2.99272	-1.42839	-3.44246	-2.92684	0.172187	-0.896368	-0.0192459	-0.520063	-1.37387	-0.258469	-0.619977	0.190143	-0.239291	0.200127	-3.56438	-0.239258	-1.09791	-0.0710957	-1.00859	-0.636393	-1.22568	0
UCUUUC	U-rich	0.702122	0.66858	0.735664	0.120339	-0.0951617	0.335841	2.53739	2.26393	2.81084	2.91185	2.62365	3.20006	1.30916	1.18385	1.43447	-0.423684	-0.984337	-0.350311	0.202881	0.337347	-1.99493	0.694588	0.838422	-0.292058	0.361168	-0.593872	0.0740425	0.781976	0.185975	-0.331025	0.552458	0.73421	-0.703329	-0.188127	0.946854	1.64148	-0.00206436	0.967887	0.889794	0.328906	0.376	0.387306	2.54854	1.93934	1.16853	1.261	0.337247	0.378124
UCUUUG	U-rich	1.09364	1.05518	1.13211	0.390443	0.189335	0.59155	2.93391	2.6618	3.20602	3.13333	2.65859	3.60807	1.33455	1.22078	1.44832	0.112003	-1.06109	0.100253	2.11634	1.33399	0.870904	0	-2.62422	1.81106	0.873037	0.101819	1.68364	1.44553	-1.70852	-0.686934	-0.430287	-0.421874	0.606176	0.718528	0.821204	1.1045	2.81007	0.901247	2.41963	2.55944	5.08859	1.28487	2.52902	2.26461	1.23203	1.2861	3.43508	0.956548
UCUUUU	U-rich	0.883796	0.853609	0.913982	0.431282	0.278088	0.584477	2.98667	2.781	3.19234	2.68837	2.46708	2.90965	1.28508	1.21521	1.35494	-3.985	-3.46657	-2.01818	-1.90358	-3.06253	1.4645	-1.90785	-0.888206	-8.87018	0.580278	-2.10116	-3.70549	-1.37771	-2.07053	-1.09133	-1.04664	-1.37529	-0.911597	1.94505	-0.0743812	1.55026	1.82776	2.05216	4.10588	-0.882274	0.67392	3.34091	3.68131	1.46643	2.32351	1.3107	1.03873	2.16767
UGAAAA	A-rich	0.240971	0.196808	0.285133	1.56	1.33773	1.78227	0.714645	0.124761	1.30453	4.44065	3.70514	5.17616	-0.254894	-0.424873	-0.0849145	-1.65286	-0.977269	-2.66652	-3.24835	-2.93023	-2.59263	-2.70636	-1.00535	-3.7479	-3.55479	-1.29098	-1.82147	-1.85508	-2.59185	-0.466829	-2.03568	-2.05732	-0.127817	-0.607559	-1.71165	-0.17197	-1.84125	-0.632571	0.746117	2.17381	0.248208	-1.32404	-0.70557	-1.26009	0.696205	1.72071	0.121271	2.09121
UGAAAC	Other	0.597592	0.545975	0.649209	1.50292	1.29641	1.70944	0.508649	0.128921	0.888378	4.64131	3.43367	5.84895	-0.0884383	-0.28285	0.105974	-1.1578	0.307145	-0.486998	-0.588173	-0.18194	0.0184819	0.302461	-0.363912	-0.542108	1.09443	0.227226	0.289216	0.445419	-0.272293	1.06635	1.41212	0.939528	0.824711	-0.169909	0.499438	-0.114654	0.685558	0.510429	0.365238	0	1.21775	0.145568	0.596925	-0.0939218	0.905924	0.654629	0.659899	0.420227
UGAAAU	Other	0.548904	0.48997	0.607837	2.39676	2.22973	2.56379	1.32269	0.944685	1.7007	5.40392	4.73404	6.0738	-0.191834	-0.370769	-0.0128995	-1.35403	-0.623895	-3.52145	-2.06721	-2.32734	-2.33983	-3.72191	-0.679604	-0.855053	-3.4374	-1.41247	0.645648	-1.03345	-1.6937	-3.93872	-1.26803	-1.93231	0	0.0378645	-0.373081	-0.253952	-0.0699115	-3.4274	0.144329	-0.852946	-1.24553	-1.10823	-1.1959	0.224781	-0.575839	0.434478	-1.10184	-0.612178
UGAAGA	Other	0.1447	0.111432	0.177968	1.52115	1.31126	1.73104	-0.0114152	-0.5644	0.54157	3.48809	2.74807	4.2281	-0.123475	-0.293061	0.0461107	6.7626	6.48267	16.4975	13.6604	8.29102	8.093	12.9512	13.8206	5.79197	11.7363	15.1389	7.60254	12.815	13.4687	7.71136	8.34041	15.1168	9.58527	20.0703	13.8786	17.1781	11.472	9.24674	11.1395	12.4133	14.0898	11.2925	9.82404	6.87263	12.6636	6.06759	12.2049	12.5133
UGAUUU	U-rich	0.796895	0.753729	0.840061	1.0333	0.903473	1.16312	2.9446	2.71543	3.17377	3.43329	3.06658	3.8	0.636125	0.525372	0.746878	-4.32895	-2.02453	-2.35238	-0.814344	-3.70772	-0.735188	-3.60605	-1.81665	0.708474	-6.37634	-0.896671	-0.418674	-0.737708	-0.596801	-1.917	-3.31694	-0.783031	-0.971352	2.38177	-0.0556456	-1.33902	0.14733	0.0618491	0.598846	-0.248343	-1.18876	0.42546	-0.540244	-0.919127	-0.911309	0.650823	-0.816748	-3.84123
UGCUUU	U-rich	0.821347	0.783488	0.859207	0.437823	0.224329	0.651316	2.79339	2.48566	3.10111	3.38585	2.95139	3.8203	1.43203	1.32028	1.54378	-0.259707	-0.241691	-0.49035	0.222758	-0.167843	0.782085	0.0915329	0.894295	1.21308	0	0.135143	-1.48407	-1.47382	0.913313	0.424223	0.672061	0.418533	1.66129	0.950624	1.62343	0.602801	0.249018	1.58709	2.63689	3.25174	0.68823	0.624847	1.55216	1.32779	0.0805077	0.861526	0.704074	-0.774671
UGGUUA	Other	0.541395	0.497256	0.585533	1.18776	0.986768	1.38874	1.92255	1.55547	2.28964	6.54569	6.19446	6.89693	0.550116	0.407139	0.693093	-0.827241	-2.07415	-1.85946	-2.23403	-0.675781	-0.749374	-1.94017	-0.714808	-0.794054	0.930477	0.0112222	-1.23663	0.432052	-0.208638	-0.222472	-2.57191	0.278006	-0.381414	0.0221892	0	-0.880904	-0.424806	0.160742	0.389724	-0.152091	0.712461	-0.136615	-0.696101	0.0158545	-0.302226	0.0528071	0.204713	0.495836
UGGUUU	U-rich	0.980132	0.948903	1.01136	0.799927	0.669903	0.929951	3.14159	2.92501	3.35817	2.95953	2.68773	3.23132	1.09551	0.983937	1.20708	-1.59369	-2.33819	-0.187701	0.22002	0.19455	0.466865	-0.354102	1.25594	0.0697584	0.621223	1.03825	0.790978	0.623991	0.5567	-1.84519	4.26643	4.08144	2.93897	0.0822888	1.21902	2.17344	4.52982	2.92683	0.0554234	1.87127	1.23393	2.94413	1.94209	2.61618	3.72963	0.412656	0.539798	-0.11394
UGUAAA	UGUA-containing	1.97829	1.89839	2.05818	1.32957	1.05806	1.60108	-1.43905	-2.98253	0.104441	6.0584	5.34603	6.77077	-0.615801	-0.880475	-0.351127	-2.80693	-0.74106	-0.877928	-2.46827	-0.221188	-3.86314	-2.16839	-0.309369	-1.41345	-0.734207	-0.911006	-0.648733	-2.56578	-0.16595	-0.115854	-1.86836	-3.47601	-0.215805	0.552526	-1.53381	-0.754319	-1.26636	-2.33829	-2.43522	0.14652	0	-2.65409	-2.63991	-0.1182	-0.358403	-0.877476	0	-1.03405
UGUAAC	UGUA-containing	1.97227	1.87594	2.0686	0.214937	-0.0550343	0.484908	-0.597276	-1.41293	0.218383	3.8108	2.33849	5.2831	-0.490868	-0.808273	-0.173462	-0.36788	-0.658042	-1.00748	-1.26276	-0.577115	-0.77884	0.204517	-0.321004	-1.92396	-0.051394	-0.143098	0.733271	-0.120254	0.234968	0	-0.825216	0	-0.942689	0	0.195287	0.318372	-0.354525	-0.247017	-0.739373	-0.0719132	-1.20774	0.220326	-0.116791	0	-1.80488	0	-0.238507	-0.616289
UGUAAU	UGUA-containing	2.10192	2.03571	2.16813	1.84042	1.64371	2.03712	-0.323078	-0.731331	0.0851751	5.18482	4.32252	6.04711	-0.475791	-0.638036	-0.313546	0	-0.506873	0	-4.2977	-0.981481	-3.35165	-0.969114	-1.19334	0.182967	-0.143525	0	-0.0901875	-0.832189	-0.846	-4.36547	0	-2.36245	0.650011	-0.949092	-0.69905	-0.892293	-5.37743	-2.37423	-0.963328	-1.3419	-5.19559	-0.585472	-1.7955	-0.957225	-0.0107443	-1.53237	-0.0216333	-1.61428
UGUAUA	UGUA-containing	1.70621	1.62958	1.78283	1.18866	0.987048	1.39028	-0.585125	-0.986872	-0.183378	4.71861	4.28904	5.14817	-0.278555	-0.451618	-0.105492	-0.833619	1.43711	-2.46492	-1.87177	0	-0.723917	0.119775	-0.21969	-1.74012	-1.48182	-0.57713	-0.766146	-0.701557	0	1.46355	-0.512928	-0.748481	-0.304868	-1.41902	-2.18363	-1.02199	0	-2.06022	-0.662962	-4.25186	0	0.420284	0.268194	-1.26315	-0.345005	0.0994972	-0.476666	0.461622
UGUAUG	UGUA-containing	1.68346	1.60738	1.75954	0.41802	0.250296	0.585744	-0.0965187	-0.448529	0.255492	3.16295	1.61773	4.70817	-0.0654598	-0.332603	0.201683	-0.397975	0	-1.5601	0.364077	0.0373766	-0.31132	-0.671418	-0.39916	-0.502734	1.12038	0.0543747	1.65499	0.833819	-0.873547	-0.615088	-1.85053	-0.519088	1.06891	-0.446588	0	-1.81435	0	-0.293597	0.142341	0.529619	0.807928	-0.727487	-0.00758065	-0.426342	-0.631445	0.676887	-0.179353	0
UGUAUU	UGUA-containing	1.78521	1.72465	1.84577	0.572177	0.351045	0.793309	1.27078	0.943658	1.59791	4.46932	3.85198	5.08665	0.277476	0.10374	0.451213	-0.796251	-1.81399	-0.360905	-1.74842	0.23574	-0.923664	-2.26179	0.944577	-1.64313	0.551745	0.191689	0	1.97257	0.283216	-1.02629	-2.24787	0.606675	-2.34698	-0.872723	-1.0929	-1.09924	-0.553542	-0.115657	-0.169235	-1.16952	-0.806858	-0.232109	-3.89032	0.237577	-1.20807	0.171816	0.0491361	0.178105
UGUCUU	U-rich	1.06604	1.02691	1.10518	0.248755	-0.0263509	0.523862	1.80055	1.50375	2.09735	2.98032	2.55047	3.41017	1.29441	1.14826	1.44055	-1.13283	-0.264958	0.393355	-0.753668	-1.02422	-3.24068	-2.67867	0.104024	-1.27618	-2.18486	0.148185	-1.03123	0.0224306	1.16725	0.0600312	-0.74776	0.610974	1.42656	0.0410829	0.17206	-1.23273	-0.472672	0.821657	0.516414	0.492823	0.788071	1.51043	-1.22164	0.959908	0.505674	0.628835	0.727642	0.70826
UGUGUA	UGUA-containing	1.74276	1.6844	1.80112	0.686117	0.403344	0.968889	-0.0477419	-0.519261	0.423777	6.32028	5.86145	6.7791	0.413381	0.211718	0.615045	-0.270896	-0.843555	-4.19014	-0.133502	-0.536893	-0.209137	-0.00905938	-0.0444771	0.0391352	0.580435	-0.232605	-0.0585361	0.6527	-1.19578	0	-1.20509	-0.466107	0	-0.43997	-0.1414	0.233789	-1.27805	-0.847768	-2.51598	-0.954212	-2.06756	0.224794	-0.693859	1.38721	-0.109341	-0.397077	-0.557891	-1.10679
UGUGUG	Other	1.32044	1.28415	1.35672	0.446314	0.301322	0.591306	2.33027	2.06667	2.59387	2.36942	1.17739	3.56145	0.946308	0.790084	1.10253	0.418163	0.151547	-0.0893093	1.53961	-1.34575	1.07413	0.483943	0.230649	2.53266	2.53984	1.83175	0.747064	0.963371	1.27725	4.22203	1.06846	3.3104	0.9434	2.00293	1.43624	-0.205645	2.77354	0.391748	1.10717	2.31808	1.53744	1.69155	0.813366	1.03934	0.687488	1.86681	1.62448	1.35894
UGUGUU	U-rich	1.36927	1.33284	1.4057	0.481188	0.323506	0.63887	2.77518	2.57623	2.97412	3.17484	2.81149	3.53819	1.18664	1.06473	1.30855	0.190245	-0.984613	-1.59901	-0.703728	0.222378	-0.68341	-0.504223	1.87502	-0.0200596	-0.022867	0.0216071	-0.492953	-0.067048	-0.812442	0.113411	1.47553	1.49007	1.99056	3.22024	0.723652	1.88084	1.56189	1.59075	1.5388	0.909572	1.09747	3.31338	2.37871	-0.731467	0.722471	2.44019	0.0132222	0.909455
UGUUAU	U-rich	1.09728	1.04919	1.14537	1.60358	1.44456	1.76261	2.31801	2.02065	2.61538	5.51121	5.19041	5.83201	0.708744	0.600845	0.816644	-1.0044	-0.691495	-5.46497	-0.916782	-5.01842	-1.04748	-3.06222	-1.60884	-0.716431	-1.18133	-2.80256	0.0993009	-2.3229	-2.13808	-1.41932	-0.858031	-3.38526	-0.958799	0.816095	-0.983574	-0.172442	-6.55552	-0.595784	-0.296545	-0.307301	-2.99215	-1.06568	-3.0237	-1.12264	-0.404272	-1.37115	-1.89359	-1.16938
UGUUCU	U-rich	1.11174	1.07307	1.15041	0.392655	0.16153	0.623781	2.68898	2.43948	2.93848	2.35583	2.03622	2.67544	1.30577	1.19824	1.41331	-0.343582	-0.0407569	1.12801	-1.33734	1.0703	1.27737	1.38638	1.54669	1.54995	0.085324	0.585967	0.0460046	0.737384	-1.63668	0.935037	3.04688	1.1382	2.06056	1.02236	1.38884	3.03256	2.11499	2.59451	3.25841	2.79649	2.59708	1.33382	1.79315	2.1051	1.5083	0.734975	0.391567	-0.407942
UGUUGU	U-rich	1.56433	1.52403	1.60463	0.364806	0.169429	0.560183	2.6726	2.47759	2.86761	1.03902	0.558083	1.51996	1.0676	0.94307	1.19212	-0.579652	-0.65983	0.72449	-2.60675	-0.480803	2.64301	2.48234	1.44624	0.902345	1.51985	0.188772	3.03293	1.1837	1.31079	2.39265	1.35161	0.39499	0.516259	3.35172	1.31647	-0.393721	2.21785	5.20611	3.54907	0.896167	0.508925	3.88774	1.92493	-1.03494	5.1421	0.810423	0.461145	2.56361
UGUUUA	U-rich	0.825518	0.784847	0.866189	1.36235	1.17361	1.5511	2.644	2.31124	2.97676	4.6278	4.25302	5.00258	0.754718	0.643921	0.865515	-1.7933	-2.08412	-1.19003	-5.91777	-1.87113	-2.81883	-0.895357	-3.29021	-2.72757	-1.62299	-5.18429	-2.03737	-1.83713	-1.60464	-1.11519	-0.682328	-1.23184	-1.1207	-0.885616	-1.54026	0.124685	-0.457913	-0.206087	-1.62748	0.569452	-0.571284	-2.19636	0.576425	-0.680759	0.733805	-0.731165	-0.841496	-1.2127
UGUUUC	U-rich	1.09156	1.06071	1.12241	0.288083	0.124973	0.451193	3.17358	2.90233	3.44484	1.87023	1.54393	2.19652	1.32764	1.22192	1.43336	0.445025	-0.18321	-0.476337	1.36745	0.370673	0.673972	1.50744	1.78096	0.203642	1.02631	-0.572672	-2.25089	-0.37467	0.768205	1.92328	0.630988	-0.128345	-0.0885267	1.82842	0.600874	-0.899444	2.25446	1.29685	1.62606	0.0953655	0.410366	-0.83222	1.67384	2.25525	2.09931	2.51333	0.628966	1.91205
UGUUUG	U-rich	1.27941	1.24257	1.31625	0.518123	0.367266	0.66898	3.2124	2.96402	3.46077	0.769085	0.381124	1.15705	1.05982	0.938883	1.18076	-0.705956	-1.02002	0.852661	0.825989	-0.614219	0.324186	1.04936	-0.115079	0.856415	3.21122	1.79461	3.07797	1.53905	-0.0314104	1.10301	0.690854	0.205181	4.08073	0.0724824	-1.17417	1.93167	2.75272	1.39189	4.65521	4.09856	1.42297	0.922535	-2.36811	1.55106	2.60931	1.26641	2.60089	0.8637
UGUUUU	U-rich	1.25012	1.22193	1.27832	0.574087	0.418822	0.729352	3.36972	3.19139	3.54805	2.45693	2.20934	2.70451	1.20159	1.1214	1.28178	-3.04999	-2.10231	-1.0088	-2.5592	-1.5443	-7.0487	-2.87549	-0.969695	0.341397	1.06255	-1.8288	-1.86253	-1.25973	-2.40684	-6.87121	-0.418007	-0.0898431	-0.822721	-1.31264	1.05468	0.5744	0.701205	1.60113	-0.376326	-2.31338	2.70002	3.47741	1.49941	0.828046	1.01735	3.42691	0.272432	-0.0798313
UUAAUA	Other	0.235847	0.161341	0.310354	3.0062	2.83916	3.17324	0.357373	-0.0194761	0.734223	4.13534	3.5296	4.74108	-0.150249	-0.425951	0.125453	-0.835233	-2.14004	-4.99916	-4.38477	-1.28978	0	0	-0.121203	-0.429237	-3.96075	-1.00162	-1.59443	-0.206854	-2.62825	-0.872195	0	-2.65579	-0.188483	-0.989591	-1.4249	-0.73815	-0.394743	-1.36095	-4.14747	-4.31186	-1.13826	-1.01576	-1.21601	-1.43972	-0.907358	-3.39882	-0.140545	-2.28169
UUAAUU	U-rich	0.193658	0.141863	0.245454	1.51703	1.37752	1.65654	1.63397	1.30647	1.96147	5.36573	5.00005	5.73142	0.136973	7.74403e-05	0.273868	-3.15509	-3.30149	-1.4856	-4.48499	-4.21059	-0.0611531	-10.4777	-2.3359	-1.69714	-4.33066	-2.85843	-4.39241	-1.63263	-2.12311	-2.75702	-3.34744	-2.28237	-3.65548	-0.176943	-2.73777	-1.52868	-2.6807	-5.12501	-2.55277	-0.240597	-1.27094	-9.40193	-0.123278	-0.366829	0	-1.38875	-1.23645	-4.32687
UUACUU	U-rich	0.580733	0.536586	0.62488	0.410115	0.192657	0.627573	2.03449	1.76703	2.30194	4.60641	4.24032	4.97251	0.66569	0.539619	0.79176	-1.59171	-1.20155	-2.59834	-0.831037	-2.14752	-1.9894	-1.91169	-0.812853	-0.714994	-0.609372	-1.28716	-2.31916	-2.33538	-9.91978	-2.17566	-0.825681	-0.851842	-0.875438	-2.91873	-2.51688	-0.251853	-0.94352	-0.720296	-0.303505	-2.05499	-1.89901	-0.948273	-2.00791	-0.637103	-0.534789	0.348583	-5.42118	-0.0546991
UUAUAU	U-rich	0.638338	0.580469	0.696206	2.11331	1.97428	2.25235	1.47099	1.15951	1.78247	4.4706	4.11499	4.82621	0.0802155	-0.0532534	0.213684	-1.88588	-2.28087	-3.99382	-2.15912	-3.88372	-7.98488	-1.8018	-3.9509	-1.66072	-3.26695	-2.0214	-0.682045	-1.19185	-2.19149	-2.4277	-5.45499	-5.57763	-1.04576	-1.04336	-0.876423	-3.53308	-1.65925	-3.60635	-1.66226	-0.480684	-0.805442	-1.24941	-2.25154	0	-1.53454	-1.5065	-1.73389	-2.64086
UUAUCU	U-rich	0.587694	0.545547	0.629841	0.675188	0.548458	0.801917	2.16904	1.9093	2.42878	4.0952	3.74423	4.44617	0.664624	0.572447	0.756802	-1.24031	-0.495085	-0.285579	-0.453723	-4.68237	-1.33769	-2.53357	-3.79021	-1.98312	-2.95092	-1.19789	0	-3.623	-1.68056	-4.53081	-2.20618	-0.23277	-0.284387	-1.96737	-1.65192	-4.13445	0.0133449	-1.64175	-0.5136	0.368449	0	-3.10157	0.58693	-1.38482	-0.746258	-1.48749	0.0676962	-0.28388
UUAUGU	U-rich	1.18293	1.13387	1.232	0.876069	0.764836	0.987302	2.38644	2.1321	2.64079	3.73904	3.33473	4.14334	0.245226	0.130408	0.360044	-0.205116	-1.09899	-2.29367	-1.99149	-2.59632	-0.527306	-1.67888	-0.760368	-1.07791	-2.29251	0	-0.691586	-1.11846	-2.66625	-1.19307	-1.74815	-2.18953	-3.12384	-0.855455	-0.313072	0.375673	-1.03808	-0.57371	-1.36812	-0.379585	-2.92714	-1.31488	-2.54921	-0.627164	-1.68516	-0.464489	-0.315042	-1.35998
UUAUUA	U-rich	0.396073	0.343312	0.448834	1.99986	1.83035	2.16936	1.62762	1.36776	1.88748	3.89621	3.59395	4.19847	0.275506	0.131603	0.419408	-2.0889	-2.12035	-0.327901	-1.21984	-2.46422	-1.98887	-1.84099	-2.3604	-1.07487	-3.83038	-2.35627	-4.57923	-3.53262	-2.19722	-0.926365	-0.651893	-1.85055	0.315356	-9.91271	-0.778902	-2.36509	-3.51242	-0.415282	-4.16096	-3.56496	-1.2881	-0.413199	-1.91681	-1.19293	-0.691029	-3.35625	-0.723384	-5.51439
UUAUUC	U-rich	0.455819	0.403106	0.508533	1.01697	0.842737	1.1912	2.52204	2.22556	2.81852	4.78695	4.27741	5.2965	0.517113	0.355803	0.678423	-0.945113	-0.480218	0	-0.721942	-2.90867	-0.864303	-1.43479	-1.67694	-0.496986	-3.43955	-0.466677	-1.49704	-1.51459	-1.563	-1.61106	-0.4933	-1.8045	-0.295085	-1.8265	-1.0194	-2.49292	0.0016858	-0.349355	-0.583824	-1.10837	-0.822956	-1.32497	0	0.158615	-1.71485	0.364398	-0.990549	-1.20464
UUAUUG	U-rich	0.778537	0.725691	0.831382	1.21061	1.03176	1.38947	2.66252	2.39988	2.92516	4.50419	3.9869	5.02148	0.260452	0.140834	0.38007	-2.71881	-1.94888	-0.404143	-1.36306	-5.08065	-0.489364	-4.7706	-2.0081	0.391332	-0.997937	-3.95229	-0.11992	-1.25338	-0.803633	-2.77249	-2.02632	-0.194709	-3.3705	-0.383746	-1.11625	-0.16782	-1.11715	-1.62012	-2.11012	-0.979914	-0.115709	-0.945205	-2.28437	-0.71926	-2.26467	-0.317634	-0.532505	-1.13747
UUAUUU	U-rich	0.552057	0.510001	0.594113	1.02429	0.880448	1.16814	2.65852	2.45579	2.86125	4.84075	4.53806	5.14343	0.420044	0.331487	0.508601	-2.27234	-3.79435	-3.09188	-7.05721	-6.08996	-5.97687	-5.92877	-2.61815	-4.70494	-1.82698	-2.31904	-1.62433	-2.88186	-3.59579	-4.09033	-3.54092	-3.74554	-5.8831	-2.96591	-1.36834	-3.33618	-1.65396	-4.64666	-7.21549	-0.153012	-2.61539	-1.54276	-1.13185	-1.80357	-4.65733	-3.4852	-4.85445	-0.871323
UUCAUU	U-rich	0.562101	0.51434	0.609862	0.632479	0.441484	0.823474	2.25264	2.02047	2.48482	4.48116	4.09657	4.86574	1.00559	0.905973	1.10521	-2.54812	-3.03954	-1.98587	-2.25656	-2.00288	-5.06226	-2.25289	-0.38375	-1.26239	-0.101533	-5.77624	-2.32337	-1.05087	-2.10876	-1.29797	-1.49076	-1.18395	-1.35603	-2.5381	-3.72121	-1.49343	0.673672	-0.911668	0.0554487	-0.202795	-0.120338	-0.602687	-0.951649	1.28057	-0.291718	-0.587454	-0.312111	-0.834608
UUCUAU	U-rich	0.727505	0.678909	0.7761	1.35654	1.19389	1.51918	1.99616	1.67849	2.31382	4.27313	3.8982	4.64806	0.72823	0.608452	0.848008	-1.55202	-1.03872	-3.04263	-2.73772	0	-2.05423	-1.21255	-2.94995	-2.78558	-1.28741	-1.18052	2.58598	-1.2493	-2.96966	-1.54178	-4.09546	-0.451405	-1.0728	-2.69814	-0.236347	-1.18768	0	-1.14926	-0.351524	0	-0.787165	-0.291744	-0.410683	-1.4399	0.288451	1.62123	-0.781663	-0.86408
UUCUCA	Other	0.527995	0.49133	0.56466	0.537273	0.290484	0.784061	1.77396	1.34721	2.20072	4.62301	4.10987	5.13614	1.3286	1.1987	1.4585	-0.0903807	-0.200886	-0.0699964	-0.969131	0.760382	-0.399967	0.234897	0	0.897148	-0.220073	0.74782	-1.11463	-0.175161	-0.486318	0.447459	-0.434612	0.338178	0.814439	1.26953	-0.41409	0.428032	0.0218499	2.61036	1.15656	3.33624	4.15426	1.04788	0.85606	0.235468	0.259077	1.06503	1.17701	-0.104422
UUCUCU	U-rich	0.893644	0.86094	0.926347	0.103596	-0.0772378	0.28443	2.6992	2.48298	2.91542	2.81558	2.52657	3.10459	1.62195	1.50999	1.7339	-0.585525	0.393091	-1.21899	-0.762707	-0.577867	-1.22314	0.739472	0.993611	0.0767974	0.974501	-1.53218	0.416394	-3.50055	-2.01193	0.313725	-0.205586	0.348492	2.78109	3.59586	0.0850033	0.931701	0.83964	2.64639	2.37014	3.68008	2.71153	2.99897	2.48065	2.3219	4.3546	2.06879	4.71145	2.67227
UUCUGU	U-rich	1.38048	1.32815	1.4328	0.3464	0.0697341	0.623066	2.90877	2.55451	3.26303	2.67247	1.78853	3.55642	1.29285	1.10895	1.47676	-0.371343	0.889888	-0.144029	0.0820406	-0.960263	-0.524259	1.06968	-3.58932	1.67476	0.0525062	-0.199508	1.82676	0.433283	1.73953	1.07875	2.03566	0.00711721	0.932773	0.667109	1.28218	0	0.556296	0.855047	1.92222	0.701631	1.99904	2.32976	3.96074	-0.265713	1.96584	1.11534	1.16337	2.10393
UUCUUA	U-rich	0.533468	0.493289	0.573646	0.915408	0.736777	1.09404	2.23789	1.96788	2.5079	4.50594	4.06335	4.94853	0.944344	0.839595	1.04909	-1.70704	-1.73418	-2.20178	-3.24961	-4.13499	-2.29132	-1.67194	-0.308851	0.538305	-0.00925431	-1.38663	-2.57078	-0.36478	-4.36781	-0.875764	-0.630438	-0.267179	-0.490412	-1.70293	-1.6308	-0.312846	-2.60855	-1.09433	-1.66752	-0.22951	-0.109453	-0.102866	-1.17867	0.638796	-0.808451	-0.254739	-0.108629	-1.18472
UUCUUC	U-rich	0.563852	0.53621	0.591495	-0.125363	-0.354633	0.103906	2.74999	2.49979	3.00018	3.0337	2.79205	3.27536	1.63172	1.52532	1.73812	0.182866	1.53193	0.162926	1.99324	1.45191	1.54065	0.251402	0.262198	1.33736	-0.481163	-0.674046	0.254869	-0.552664	0.0280846	0.353179	1.98106	1.58649	1.41573	1.82779	2.41211	0.729845	4.18391	4.62221	4.21641	6.1167	3.64966	4.14311	2.67138	2.0646	4.21203	3.37634	5.56778	3.50949
UUCUUG	U-rich	1.14309	1.10227	1.18391	0.672427	0.473551	0.871302	3.41793	3.16282	3.67305	2.37564	2.07082	2.68047	1.32716	1.19626	1.45806	1.07595	-0.383159	-0.736409	-0.578123	0.897293	1.36646	4.22476	0.757082	1.36338	2.26895	0.361317	2.14366	-0.552395	2.06641	1.25229	1.6733	0.268615	2.90904	3.78924	4.16801	1.53599	3.16303	4.27009	1.9966	2.95755	0.594781	0.615845	3.47402	3.39478	1.27676	2.39528	2.32585	0.3574
UUCUUU	U-rich	0.861144	0.830434	0.891854	0.468632	0.307517	0.629747	2.6771	2.49162	2.86258	2.60267	2.40942	2.79591	1.37378	1.28848	1.45907	-3.65	-3.77922	-1.57818	-0.246881	2.1304	-3.62656	-0.577416	-0.64446	-0.0719425	-2.51502	-3.14341	-1.33533	-4.77273	-0.963032	-1.85508	-1.40675	-1.26992	1.01781	-0.917992	0.541605	1.97088	1.46031	2.65122	0.178137	-1.08602	2.60066	5.34022	2.71497	-0.0469449	0.712402	-0.657733	0.118709	3.61621
UUGAAA	Other	0.554702	0.506813	0.602591	1.61159	1.43915	1.78404	0.419598	0.128807	0.710389	5.17972	4.6261	5.73335	0.124879	-0.0258354	0.275594	-0.905782	-2.69053	-1.61153	-4.69251	-3.03799	-2.79054	-1.66636	-1.89275	-2.54647	-0.481535	-0.227759	0.484529	-1.74916	-0.909786	-2.08988	-4.05767	-0.270791	-0.920912	-0.589522	-0.990199	-0.156405	-1.17634	-0.415755	-1.51654	0.00713778	0.0159457	-0.713555	-0.44278	-0.744645	0.722624	0.313244	-0.64358	0.520746
UUGAUU	U-rich	0.653387	0.616509	0.690266	1.07268	0.938063	1.20729	2.31123	2.11699	2.50547	2.807	2.47127	3.14273	0.761659	0.656497	0.866821	-1.14415	-1.88808	-0.343215	-0.514482	-2.15703	-3.85762	-5.94205	-1.19007	-3.06182	-1.63338	-2.16921	-0.393496	-0.362035	-6.14725	-0.881836	-0.665808	-4.74266	0.326934	-2.74643	-0.973565	0.360838	-0.135739	-0.739473	-4.02591	-0.830931	-0.604933	-0.618791	0.383095	-4.28841	2.10691	-1.84777	-3.87419	-3.6202
UUGCUU	U-rich	0.798221	0.762025	0.834417	0.381705	0.144542	0.618867	2.51062	2.26304	2.75819	3.60441	3.09579	4.11303	1.57456	1.44624	1.70288	-0.372057	-1.49924	0.233015	-0.17922	-0.74945	-0.704663	-0.585494	1.44737	1.04954	-2.03424	-2.95746	-1.49115	-0.19821	-0.447462	1.24958	1.71314	0.725012	0.96498	0.827924	-0.924627	0.00745673	1.23254	2.31386	3.05167	1.94882	2.17435	0.554459	1.89679	2.32681	0.120209	1.04763	0.980502	0.0887043
UUGGGU	Other	0.899405	0.85016	0.948651	0.645566	0.446023	0.845109	3.44964	3.11878	3.78049	5.49725	4.33388	6.66062	1.05533	0.821872	1.28879	-0.0220309	0.327104	-0.0228054	0.330172	0.616046	1.44756	0.549502	1.63707	0.156818	-0.131862	0.655013	0.400179	0.520705	0.302254	1.50926	1.55124	2.32604	-0.490951	0	1.10233	-0.0553414	1.24123	0.802309	0.914668	0.475477	2.648	0.880138	1.89405	1.52112	1.88233	1.53141	2.28132	0.0142524
UUGGUU	U-rich	0.968568	0.934889	1.00225	0.735131	0.598351	0.87191	2.9873	2.81962	3.15498	3.78265	3.43922	4.12609	1.08624	0.976402	1.19607	-0.896985	-1.58239	-0.914858	0.556534	0.0619241	-1.04705	1.16821	0.552648	-0.107763	0.281993	0.087682	2.54204	2.81666	-1.21997	2.36968	2.86952	-0.687763	3.30252	0.266946	1.96312	2.02883	3.73596	0.0311915	1.67767	0.888544	1.22711	2.78211	0.0258518	2.64274	2.50205	2.19082	0.66605	-2.10719
UUGUAA	UGUA-containing	2.169	2.1056	2.23241	1.42584	1.17982	1.67187	-0.286275	-0.93978	0.367231	5.13925	4.27673	6.00176	-0.172762	-0.395576	0.0500527	-0.616854	-1.19697	-1.96339	-1.04422	-4.34339	-0.885177	-2.17825	-0.585645	-0.757983	-1.10445	0.71816	-3.30157	0.040236	-0.47211	-0.639607	-6.05852	-0.57407	0	-0.475926	-0.606062	-0.202825	-3.49492	-2.10957	-0.801002	-3.35497	-0.239762	-1.00172	0.233466	-2.53904	0.501425	-0.672858	-2.03632	-1.09184
UUGUAU	UGUA-containing	1.91706	1.85754	1.97658	0.586139	0.389002	0.783276	1.15164	0.771494	1.53179	3.12576	2.66427	3.58724	0.3734	0.209804	0.536997	-0.746966	-1.86701	-2.05666	0.00670107	-0.911866	-2.59161	0.499881	-2.4928	0.330069	0	0.164611	1.31407	-0.669593	-2.36956	-1.51877	0.618568	-0.126313	-1.2669	-1.62026	-0.999913	0	-1.34858	0.0730968	0.268468	0	2.31692	0.362787	-0.18501	-0.560356	0.190515	0.449385	0.0241808	0.861134
UUGUCU	U-rich	1.20643	1.16421	1.24865	0.0979877	-0.118517	0.314493	2.29269	2.00361	2.58177	3.33859	2.84287	3.83431	1.4357	1.27936	1.59205	-0.070701	-0.0200043	-0.184451	-1.15889	-1.11702	-2.69424	-2.07313	-0.0568805	-0.835294	0.303895	-2.11869	0.369669	0.399889	-1.1498	0.0553682	-0.259312	-1.29122	0.277265	0.939336	0	-0.584378	1.26325	0.0312169	0.256909	1.4002	2.61317	-0.530228	-0.820414	-0.0160105	0.656709	0.744755	1.64617	-0.453806
UUGUGU	U-rich	1.56078	1.52383	1.59772	0.472997	0.31523	0.630765	3.25786	3.04114	3.47457	3.95906	3.21437	4.70374	1.22417	1.09968	1.34867	-0.278106	-5.62792	-0.218919	-2.5968	-1.38993	-0.643897	0.159012	2.72821	0.763608	0.0293909	-0.223414	0.124352	-0.837508	1.03229	0.470077	1.70923	1.70945	0.646016	2.15389	-0.85191	-0.19737	-0.671151	-1.57484	0.151998	5.49863	1.99354	3.34311	-1.03744	0.221725	2.14473	1.8481	1.26435	1.59426
UUGUUA	U-rich	0.981182	0.939592	1.02277	1.01961	0.819615	1.2196	1.93166	1.64535	2.21797	5.89285	5.60424	6.18146	0.726363	0.618741	0.833986	-1.83867	-4.0088	-2.27775	-3.78497	-3.86793	-3.05223	-1.54599	-2.33199	-1.60608	-3.32722	-3.84341	-1.84907	-2.63074	-1.38573	-3.29445	-0.948309	-3.29166	-1.14758	-4.16172	-0.489135	-3.04637	-2.56283	-1.12184	-1.29334	-3.38283	-1.02734	-1.29023	-0.231156	-0.685336	-0.389883	-1.30023	-0.616399	-4.5224
UUGUUC	U-rich	1.0093	0.973667	1.04493	0.323236	0.0962196	0.550252	2.87075	2.59343	3.14807	2.20871	1.8393	2.57811	1.37754	1.26201	1.49307	-0.946709	-0.490444	-0.467911	-0.521651	0.885744	1.37311	1.40091	-0.919948	0.349553	0.34914	1.27656	0.88581	0.10549	1.75665	0.947294	-0.107006	-0.32835	0.266806	1.28227	2.21339	1.78718	1.19227	1.03806	1.31632	2.74981	1.96183	2.34472	0.948834	0.386044	0.521839	-0.441749	0.94622	0.0728635
UUGUUG	U-rich	1.36162	1.32539	1.39784	0.662288	0.450222	0.874354	2.92448	2.71861	3.13035	1.26276	0.853399	1.67211	1.16197	1.04932	1.27461	1.03831	-0.859387	1.21008	0.89866	2.52483	1.38309	0.812592	3.12712	1.42669	0.0521	3.33945	0.984677	3.45433	1.66113	0.556469	-0.385618	1.60376	1.99321	2.90151	1.2519	4.29873	4.27038	4.1268	3.00476	0.2522	3.00399	2.5181	0.813342	2.94554	0.760744	1.33969	2.61082	2.24883
UUGUUU	U-rich	1.26655	1.23887	1.29423	0.550683	0.397904	0.703461	3.07608	2.90794	3.24423	2.35306	2.10247	2.60365	1.32486	1.23682	1.41291	-2.71202	-2.7696	-4.82609	-5.32449	-4.50819	-1.11681	-1.79194	-4.04064	2.13988	-3.57137	-3.5992	-0.20903	-4.48518	-4.4372	-0.614355	-1.75405	4.22611	-0.828315	-0.933906	0.870893	0.308757	1.79739	1.18161	5.32716	1.08537	1.6036	2.01949	1.91598	1.77734	3.70615	1.66029	0.556823	0.575975
UUUAAU	U-rich	0.411808	0.356996	0.466621	2.48791	2.33222	2.64361	1.67483	1.40508	1.94458	4.09989	3.59664	4.60314	0.326583	0.198243	0.454923	-3.44793	0	-3.07243	-2.0492	-2.5889	-0.8894	-0.930802	-1.17975	-5.31605	-0.399049	-5.08637	-0.32049	-3.62374	-0.527014	-0.871295	-3.51491	-3.2671	-2.95391	-0.615889	-2.81712	-1.70736	-1.71356	-2.54351	-4.41703	-0.987555	-5.89256	-0.661172	0.238267	-0.628427	-0.983244	-0.197892	-3.59192	-3.10127
UUUACU	U-rich	0.536081	0.496709	0.575454	0.810588	0.604823	1.01635	2.32601	2.01577	2.63625	3.80374	3.45697	4.1505	0.878654	0.774376	0.982932	-1.62739	-3.70799	-0.415851	-2.0903	-1.48633	-1.38285	-1.67046	-1.17955	-0.591158	-1.97251	-0.621246	-0.649022	-3.07924	-1.88279	-0.588924	-3.42399	-2.29199	-0.301025	-1.06074	-1.48156	-0.319953	-1.18828	-1.87604	-0.514359	-2.50164	-1.12223	-1.10613	-1.39261	-1.53121	-0.663336	-1.41925	-0.220051	-1.59367
UUUAUA	U-rich	0.486998	0.434088	0.539909	2.11572	1.95817	2.27326	1.56072	1.16393	1.9575	3.93194	3.52742	4.33647	0.154018	0.0175588	0.290477	-0.904993	-3.99483	-0.715813	0	-0.647951	-2.08193	-1.69385	-2.70696	-3.49626	-1.74637	-3.76198	-1.92703	-0.66815	-2.0393	-2.0118	-4.16238	-0.461094	-1.62212	0	-1.43006	-1.42078	-2.67273	-1.10649	-2.28792	-3.09728	0	0	-0.500916	-0.548601	-1.11883	-0.856549	-2.67333	-3.29886
UUUAUC	U-rich	0.516464	0.475461	0.557468	1.04474	0.88013	1.20936	2.62525	2.26097	2.98953	3.83226	3.53458	4.12995	0.700556	0.580909	0.820203	-1.06928	-1.50889	-1.20155	-2.03538	-1.8853	-1.0429	-1.82654	-4.44248	-1.58897	-0.68712	-0.529939	-1.07129	-1.33834	-3.08181	-2.62262	-3.14289	-2.44595	-2.94593	-0.716331	-2.18027	-0.410413	-2.79608	-0.219937	-1.11494	0.140543	-0.155972	-0.0074103	-3.14966	-2.6963	-1.53688	-1.35281	-0.910418	-0.0686274
UUUAUG	U-rich	0.847028	0.804159	0.889896	1.6431	1.50024	1.78596	3.37688	3.06551	3.68826	3.54703	3.19832	3.89574	0.396339	0.287544	0.505134	-0.660938	-0.825064	-1.65976	0.223292	-1.39515	-0.819006	-2.46795	0.0487531	-2.02702	-0.0734155	-0.341077	-1.39472	-3.61501	-0.114251	-3.52057	-1.14046	-0.910794	-1.47949	-0.579229	-1.24088	-0.534244	-0.828626	-1.14326	-1.26787	-2.11302	-1.13492	-1.17236	0	-0.726445	-1.55952	0.303023	0.638382	-0.634499
UUUAUU	U-rich	0.577683	0.536287	0.619079	1.33479	1.18633	1.48324	2.64349	2.43749	2.8495	3.98836	3.72846	4.24826	0.519936	0.434707	0.605166	-2.57373	-1.87801	-6.32935	-6.29864	-2.73007	-3.36779	-1.4734	-4.40497	-4.46337	-2.53117	-2.33973	-5.93422	-3.07504	-3.44631	-3.23154	-6.2111	-0.992137	-1.21978	-0.228823	-5.1173	-2.10984	-3.50884	-0.459659	-2.05048	0.119957	-1.23436	-2.22422	-1.21372	-2.39647	-2.66312	-1.39916	-1.96529	-0.741929
UUUCAA	Other	0.370778	0.330439	0.411117	1.39751	1.24143	1.55359	2.36473	1.99384	2.73562	4.19384	3.45051	4.93716	0.869612	0.751288	0.987936	-0.724591	-1.48438	-0.574514	-1.91361	-2.35967	-0.580152	-0.495777	-1.44603	-1.14163	-1.62482	0.235058	-0.197838	-2.37758	-0.445788	-1.47294	-2.63704	-0.394699	-2.87174	-0.510798	2.24179	-0.723578	-0.0482257	1.48524	-1.50742	0.587	-1.6937	0	-0.730766	-0.658859	-0.208088	-0.60487	-1.37262	0.34397
UUUCAU	U-rich	0.594	0.553056	0.634943	0.618677	0.464113	0.773241	2.58335	2.31936	2.84733	3.63252	3.28068	3.98437	1.08558	0.995995	1.17517	-4.24454	-1.97663	-0.644294	-0.732162	0	-0.89874	-1.27873	-4.33135	-2.11448	-2.03391	1.10037	-5.27057	0.0669777	-0.727775	-3.68464	-2.80167	-0.832148	-0.969778	-1.04207	-1.7763	-0.498234	-1.05267	1.14446	-0.623374	0.0116824	0.477843	0.0371891	0.439991	0.32795	-0.30923	-1.09466	-1.20787	-0.899824
UUUCUA	U-rich	0.645048	0.599186	0.690909	1.00041	0.809439	1.19137	2.77597	2.3963	3.15564	3.95507	3.51398	4.39616	0.920192	0.788972	1.05141	-1.1589	-6.39183	-4.19795	-1.90817	-1.97004	-2.35415	-4.10247	-4.43018	-3.32818	-1.84493	-0.827856	-3.59937	-1.44063	-1.83428	-2.92801	-1.57751	-0.51873	-2.00836	-0.856086	-1.55026	-1.03285	-3.14558	-2.83758	-0.825571	-2.67125	0.198003	-0.787603	0.736786	-1.90114	1.0689	0.56477	-1.3623	-0.380379
UUUCUC	U-rich	0.789232	0.755133	0.823331	0.158686	-0.0119356	0.329307	3.1569	2.89188	3.42192	3.1073	2.81997	3.39463	1.43922	1.32848	1.54996	0.0889188	-0.0610356	-0.771932	-0.653522	-0.456822	-0.213485	-1.05788	-0.882917	-0.846159	-1.91736	-0.55292	0.749254	-1.06567	-0.87893	0.759097	-1.09882	0.469016	0.198048	-0.983859	0.72498	-0.292949	1.04983	-0.361983	4.32231	0.788078	0.442536	2.26412	0.572185	2.32958	1.59262	2.32743	0.151705	4.47627
UUUCUG	U-rich	1.01148	0.971758	1.0512	0.589632	0.371111	0.808153	4.05217	3.72774	4.3766	2.34485	1.92489	2.76482	1.24485	1.10677	1.38294	0.573647	-0.0517055	0	-0.229168	0.0602024	1.49554	0.162949	0.985612	1.62978	-0.192315	1.10812	1.38162	0.3702	0.237534	0.830213	1.95419	0.362316	-0.36948	1.09371	0.339401	0.567104	1.25151	1.62466	2.31398	1.22537	1.51593	1.86424	2.9028	1.0806	1.86056	3.99288	2.70711	1.62571
UUUCUU	U-rich	0.875394	0.846758	0.90403	0.360351	0.213613	0.507089	2.96864	2.81054	3.12674	2.73628	2.55561	2.91694	1.38141	1.30046	1.46235	-2.43138	-1.38328	-2.08109	-3.23728	-2.35221	-4.35264	-1.27467	-0.944841	-1.76123	-1.70649	-1.00527	-3.20726	-1.9984	-4.92952	-0.0617418	-0.795433	0.407312	0.0527473	1.2034	1.28276	0.0459235	1.72515	2.62691	1.39855	1.86903	4.83952	2.44069	1.36131	-0.950835	1.16112	1.83746	4.34969	2.43354
UUUGAU	U-rich	0.779516	0.745691	0.813341	1.19173	1.05976	1.3237	2.80569	2.59561	3.01577	2.67246	2.36941	2.9755	0.899732	0.794684	1.00478	-0.802955	-0.132436	-2.81495	-1.20921	-2.93019	-5.39413	-2.09638	-0.32534	-3.89959	-1.20438	-0.198496	-0.689448	-3.45785	-0.44536	-4.44049	-1.412	-0.681708	-0.912986	-0.301398	-1.81013	0.236412	-1.69487	-2.84662	-1.03474	0.130555	0.286104	0.468569	-2.11951	0.723013	0.44133	-0.467818	-2.31948	-0.748924
UUUGCU	U-rich	0.76735	0.732983	0.801717	0.352777	0.140495	0.565058	3.42656	3.1252	3.72792	3.90136	3.35301	4.44971	1.2964	1.15154	1.44126	-0.437686	0.107125	1.09657	0.484117	0.871923	-0.105561	-0.037297	1.84417	1.56836	-0.859858	0.16472	0.120764	-0.279643	1.06213	0.246321	0.150353	1.45803	-0.312752	-0.0756846	-1.14302	2.10491	3.80959	0.5615	1.19391	-0.00369767	1.04855	2.3669	1.97497	1.68322	-0.171933	1.31214	2.065	0.486705
UUUGGA	Other	0.83646	0.802579	0.870341	1.19056	1.03837	1.34274	2.83407	2.48549	3.18266	3.86312	3.23349	4.49275	0.730458	0.570813	0.890103	1.29028	3.58272	0.466378	1.27431	1.58176	1.63009	2.87903	1.65257	5.15759	3.17634	1.74812	-0.876945	1.54991	1.16654	1.61701	3.92662	-0.130698	1.12372	-0.144317	2.27212	1.09751	0.621075	2.42385	3.28888	1.61114	0.571718	1.46953	2.60063	0.271542	2.12106	2.72051	0.404333	1.24445
UUUGGG	Other	0.855383	0.817167	0.893599	0.794545	0.624991	0.964099	4.10028	3.74694	4.45362	3.35469	2.7192	3.99019	0.925892	0.744305	1.10748	-0.0571056	0.609265	0.332787	2.62103	1.16764	0.406831	1.22172	0.269051	3.52523	2.44346	0.807573	1.87635	1.77623	1.77773	1.01696	1.9906	0.0927668	0.86872	0.806508	0.252984	1.80216	0.0449773	2.73493	0.832876	1.22945	1.03733	1.71842	-0.248965	1.22815	0.670921	0.593391	0.963255	2.01064
UUUGGU	U-rich	1.02076	0.987201	1.05432	0.883971	0.73834	1.0296	3.54323	3.34639	3.74006	3.8511	3.31686	4.38534	1.04514	0.943737	1.14655	-0.477062	-0.489847	0.211994	-1.38111	-0.276207	2.55092	-0.687278	2.65909	-1.03402	0.553972	-0.306699	1.26805	-2.01143	-0.700172	1.08532	0.463402	-0.252121	-1.65629	0.896882	0.596893	1.69208	0.436616	-0.157378	3.20928	1.01225	1.88115	0.341836	2.85419	0.156257	1.54002	1.91146	1.56709	3.12694
UUUGUA	UGUA-containing	2.00847	1.95488	2.06206	0.691955	0.486031	0.897879	1.56877	1.20445	1.9331	3.86454	3.27773	4.45135	0.442683	0.300355	0.58501	-0.810398	-1.62044	-0.257963	-1.31721	-2.97504	-0.962645	0.043333	-1.72063	0.0947059	0.161756	-1.17767	-0.0112091	-0.16251	-1.25973	-0.150457	-0.253383	-0.138664	-2.32909	-1.34389	-1.48541	-1.20339	-1.01122	-0.856042	0.271096	1.4194	-2.22497	-0.357931	1.85427	-1.28327	-1.60128	-0.169785	1.30988	-1.98328
UUUGUC	U-rich	1.09358	1.05494	1.13221	0.164384	-0.052618	0.381387	3.069	2.7311	3.40691	3.89439	3.37937	4.40941	1.20881	1.08084	1.33678	0.268721	-0.0904238	-1.17255	-1.20785	-0.494521	-0.473172	0.0144322	-0.579522	-0.363362	-1.92489	-0.834487	-0.412423	-0.346552	0.15488	-0.0943917	0.410643	-0.654379	-0.439223	-0.707274	-0.353233	0.260835	1.12377	-1.47279	-0.41054	1.4233	-0.345898	-0.0874193	-3.8743	-0.366698	0.220448	-0.180348	-0.574391	-0.428327
UUUGUG	U-rich	1.33365	1.29848	1.36881	0.745277	0.585659	0.904896	3.67302	3.40588	3.94015	2.96126	2.50461	3.41791	1.06138	0.9362	1.18656	-1.73117	-0.851019	-1.99425	-0.689353	-0.15231	2.91437	0.0751873	0.163582	0.18279	-1.0674	0.847529	2.13489	2.92505	2.26768	-0.351586	-0.508197	3.8057	0.57875	-1.59909	0.643241	0.768785	-0.03511	0.678642	4.12254	1.98993	4.04061	4.37512	1.26433	1.46128	0.927517	1.4957	1.66292	-0.0124629
UUUGUU	U-rich	1.24326	1.21703	1.26948	0.596028	0.444498	0.747559	2.99557	2.85724	3.1339	3.01445	2.78109	3.2478	1.21506	1.13625	1.29387	-3.4468	-1.52156	-4.79908	-3.00441	-4.25682	-0.400681	-2.25713	0.652326	-3.87284	-3.31239	-2.90633	0.61637	-3.45622	-7.17972	-2.08345	-1.76142	0.587581	-1.21753	0.151675	-2.14176	-2.0516	1.24043	4.65817	0.903502	3.36964	-0.283517	2.45868	-0.4904	1.15852	-1.24554	1.93781	-1.76145	3.22706
UUUUAA	U-rich	0.41648	0.375685	0.457275	1.86996	1.71091	2.029	2.25238	1.93	2.57476	3.68771	3.26409	4.11134	0.436556	0.333323	0.539788	-2.34605	-8.16184	-2.42218	-4.87758	-3.0769	-5.21583	-4.48423	-6.59273	-3.95579	-2.32754	-1.41878	-5.05153	-1.04483	-2.79719	-4.70144	-3.01735	-3.32608	-1.65175	-0.445289	-5.32253	-3.48125	-3.33774	-2.41273	-1.25829	-3.49661	-0.761877	-0.315029	-1.02091	-0.0304903	0.761459	-3.07444	0.163474	-2.24629
UUUUAC	U-rich	0.4932	0.452343	0.534057	0.543664	0.333328	0.754	2.49215	2.16548	2.81883	2.98734	2.60007	3.3746	0.904148	0.778238	1.03006	-0.873892	-3.67489	-2.04023	-2.40428	-0.397777	-0.82878	-0.618824	-2.80176	-0.356573	-0.858285	-3.56104	-0.971122	-1.50202	-1.11981	-1.70682	-2.46593	-0.663207	0.561116	-1.59259	-0.808852	-2.01683	-0.534017	0.140895	-3.38341	-1.22113	-0.43061	-1.58942	-1.23924	-0.974969	-1.67987	0.0700412	-0.663275	-4.0931
UUUUAU	U-rich	0.701473	0.662656	0.740289	1.5615	1.42177	1.70122	2.88292	2.65933	3.1065	3.49912	3.24054	3.75769	0.641154	0.558951	0.723358	-0.210657	-5.22033	-1.89572	-1.48267	0	-3.03447	-6.73861	-4.03734	-0.619069	-3.27675	0	-2.11016	-3.82808	-4.12738	-1.46278	-2.17661	-3.84517	-1.45688	-6.73131	-1.81853	-1.78667	-0.0732364	-4.50612	-0.351786	-2.98767	-1.3208	-1.08126	-1.41909	-0.678398	-2.05492	-1.95536	0.124516	-2.48474
UUUUCA	U-rich	0.572478	0.533676	0.61128	0.70256	0.535232	0.869889	3.40912	3.10097	3.71726	3.42152	2.99943	3.84362	1.06018	0.970598	1.14975	-1.71442	-1.45977	-3.12036	-2.68725	-1.06992	-0.0397582	-4.68243	-1.65681	-3.9434	-0.141531	-4.04112	-0.40611	0	-2.70775	-2.2239	-0.357154	-2.98658	-1.16457	-3.31588	0.48503	-0.54297	-0.930423	1.04864	1.87312	-0.802811	-0.144887	0.435497	1.50806	1.1385	0.068541	0.0846173	-1.1929	-0.361748
UUUUCU	U-rich	0.847927	0.817786	0.878069	0.307236	0.15123	0.463242	3.25209	3.07336	3.43083	2.68236	2.45218	2.91255	1.27095	1.19456	1.34735	-0.7678	-2.49464	-3.88282	-1.05224	-2.38	-3.76434	-3.30791	-4.88099	-1.67348	-1.19408	-1.4461	-0.868991	-0.441314	-1.49099	-0.287285	0.0665544	-1.34143	0.347245	-1.02503	0.0778345	1.29119	1.14803	3.02273	1.78838	1.91151	5.92934	3.73507	0.0422412	1.49052	3.24768	1.95258	5.37881	1.58968
UUUUGA	U-rich	0.807808	0.775581	0.840035	1.11414	0.959715	1.26857	3.17794	2.89871	3.45718	2.67242	2.28449	3.06035	0.825847	0.720309	0.931385	-0.431837	-2.59258	-1.08544	-1.19266	-1.4232	-3.14545	-0.389168	-0.0117382	-2.71087	0.161299	-2.69764	-0.43246	-4.71331	-0.372158	-0.0598919	-0.20769	0.701207	-0.989737	0.658922	-2.23756	-1.33063	0.378355	0.487719	-0.716932	-0.329095	0.17022	-2.21929	1.38885	0.258833	0.48229	-1.02956	-0.0517795	-0.496298
UUUUGC	U-rich	0.710203	0.672854	0.747552	0.494969	0.301893	0.688044	4.04288	3.71531	4.37046	2.93192	2.4112	3.45264	1.23885	1.12719	1.35051	0.46487	-0.052342	0.396233	0.254654	1.16021	1.07618	1.49987	0.689956	-1.72693	-0.0124037	-0.690422	0.531487	0.997722	0.752083	1.29568	0.381937	-1.16132	-0.201156	0.587653	0.163912	3.68026	1.46388	2.17204	0.139991	2.28962	2.2096	1.59901	1.01453	-0.338714	3.40439	0.578256	-0.0261161	0.535726
UUUUGG	U-rich	0.978853	0.949055	1.00865	0.890398	0.756919	1.02388	4.31147	4.07994	4.543	2.75953	2.48004	3.03901	0.993747	0.882047	1.10545	2.08867	-0.018357	-0.732645	0.635069	0.938483	0.0620958	1.56909	2.09742	2.27416	1.69908	-0.937687	-0.378548	-0.0717845	-0.429112	2.24262	-1.40235	0.222256	0.2272	0.905201	0.477765	-1.8251	2.25451	4.06321	0.648537	1.67534	1.51939	-1.1848	0.0890259	0.448558	1.22156	1.59715	2.64833	-0.0248489
UUUUGU	U-rich	1.43698	1.40605	1.46791	0.44171	0.288284	0.595136	3.33342	3.17133	3.49551	2.68178	2.39365	2.96991	1.02877	0.945867	1.11168	-1.09145	-6.85796	-4.60105	-5.31804	1.2872	-0.163865	-0.0833704	-2.11109	-1.51759	-0.334212	0.568099	0.682668	-3.40976	-2.10143	-3.39822	-1.48437	-1.30867	-1.33468	-2.72666	-0.976542	-1.59021	-1.77874	1.25093	3.20091	3.41694	1.89894	-3.77381	-0.12015	1.19376	0.0115395	1.5249	1.42685	1.76133
UUUUUA	U-rich	0.603143	0.567266	0.639021	1.25098	1.08793	1.41402	2.7577	2.50852	3.00688	3.38423	3.10299	3.66546	0.663672	0.571832	0.755513	-7.20928	-2.89791	-4.87343	0	-3.11271	-2.8044	-7.5653	-4.16658	-2.32343	-2.63605	-2.50061	-4.30462	-3.97191	-5.78065	-0.670355	-3.97413	-1.42441	-2.9081	-3.58113	-3.44556	-0.684735	-2.73738	-1.86091	-4.52852	-1.3699	-1.64801	-1.96049	-0.433735	-1.13728	-1.31932	-1.25325	-1.00131	-4.03544
UUUUUC	U-rich	0.729204	0.695513	0.762896	0.357694	0.177241	0.538147	3.31482	3.0901	3.53954	2.90749	2.637	3.17798	1.10092	1.02965	1.17218	-1.42089	-0.5863	-2.52794	-1.4199	-2.1425	-6.50662	-1.17322	-1.65236	0	-1.90915	-1.03154	0	-0.924535	-0.731205	-0.0472952	-1.43683	-1.02728	-4.28593	-0.0123356	-1.26448	0.532439	0.0588631	1.39199	0.152597	0.91454	3.73023	0.450057	1.68774	1.53925	1.53673	3.47999	-0.285058	0.825182
UUUUUG	U-rich	1.07065	1.0395	1.10179	0.579954	0.402819	0.75709	3.79293	3.58369	4.00217	3.09057	2.79702	3.38412	0.941471	0.857195	1.02575	-4.51967	-1.16917	-3.01321	-0.51328	-0.929774	1.39746	-1.97042	-2.35764	-3.49645	-4.82963	-1.90982	-4.86629	-0.344031	-1.63419	-1.12006	-0.697601	-0.905072	0.164201	1.67668	-0.400755	-0.644281	0.717286	-2.87299	-0.109009	1.19782	0.682003	-2.06643	-0.438115	1.58863	-1.36812	-0.309456	-1.09163	0.897298
UUUUUU	U-rich	0.783392	0.758968	0.807815	0.352983	0.212655	0.493312	2.90681	2.75476	3.05887	1.9894	1.84677	2.13204	0.902405	0.852667	0.952143	-3.65319	-6.39889	-6.9105	-7.27505	-9.37135	-11.1997	-6.45603	-5.10528	-11.4903	-11.196	-9.05444	-5.38744	-6.90997	-6.19767	-4.50772	-2.73652	-3.92347	-2.48156	-0.699644	-1.18754	-4.8046	-3.88491	-3.63173	-0.95204	0.239671	0.554937	1.7206	-0.1665	-0.578077	0.039641	-1.0408	-0.711283	-1.13222
[truncated: 468 more columns]
